# Supplementary material for: Insights into the increasing virulence of the swine-origin pandemic H1N1/2009 influenza virus
Source: PubMed Central journal article supplement — Sci Rep. 2013 Apr 3;3:1601. doi: 10.1038/srep01601 (PMC3615340; doi:10.1038/srep01601), 2013-04-03
Supplement: srep01601-s1.pdf [file srep01601-s1.pdf]

**Insights into the increasing virulence of the swine-origin pandemic H1N1/2009**

**influenza virus**

Wei Zou<sup>1, †</sup>, Dijun Chen<sup>2, 3, †</sup>, Min Xiong<sup>3, †</sup>, Jiping Zhu<sup>1</sup>, Xian Lin<sup>1</sup>, Lun Wang<sup>4</sup>, Jun Zhang<sup>1</sup>, Lingling Chen<sup>3</sup>, Hongyu Zhang<sup>3</sup>, Huanchun Chen<sup>1, 5</sup>, Ming Chen<sup>2</sup>, Meilin Jin<sup>1, 5, \*</sup>

<sup>1</sup> State Key Laboratory of Agriculture Microbiology, Huazhong Agriculture University, Wuhan 430070, P. R. China

<sup>2</sup> Department of Bioinformatics, College of Life Sciences, Zhejiang University, Hangzhou, 310058, P. R. China

<sup>3</sup> State Key Laboratory of Crop Genetic Improvement, Center for Bioinformatics, College of Life Science and Technology, Huazhong Agricultural University, Wuhan 430070, P. R. China

<sup>4</sup> Key Laboratory of Horticultural Plant Biology (Ministry of Education), College of Horticulture and Forestry Science, Huazhong Agricultural University, Wuhan 430070, P. R. China

<sup>5</sup> Laboratory of Animal Virology, College of Veterinary Medicine, Huazhong Agriculture University, Wuhan 430070,

<sup>†</sup> These authors contribute equally to this work P. R. China

\* Corresponding author. Phone: +86-27-87286905. Fax: +86-27-87282608. Email: zouweixm@163.com

## **Supplementary Methods and Results**

### **Supplementary Methods**

#### **Pathogenicity of the swine- and human-origin H1N1/2009 viruses**

5-week-old female specific pathogen free (SPF) BALB/c mice were infected with 50 $\mu$ L of Jia6/10 and LN/09 viruses with the titer of  $10^3$ TCID<sub>50</sub> and monitored daily for the signs of disease and mortality till to the 14th day. Body weights were measured daily and the mice lost more than 20% of body weight were euthanized. Six mice in each group were euthanized respectively on day 3 day 5 to collect lung tissues for subsequent virus titer determination, pathological analysis and quantification of cellular factors. The lung tissues were homogenated and the supernatants were collected for detection of the production of cytokines IL-1 $\beta$ , IL-6 and TNF $\alpha$  by enzyme-linked immunosorbent assay (ELISA) according to the manufacturer's protocol (Dakewe, Shenzhen, China). Each test had three replicates. The viral titer detection and histopathological analysis of the mouse lung tissues were proceed as previously described <sup>1</sup>. Appropriate lung tissues infected by Jia6/10 and LN/09 as well as another H5N1 influenza virus (A/duck/Hubei/hangmei01/2006 [HM/06]) were fixed in 10% neutral buffered formalin and routinely processed into paraffin. Sections of 4-mm thickness were cut for hematoxylin and eosin staining for histopathologic evaluation as previously described <sup>1</sup>.

#### **Animal experiments and lung tissues collection**

Stock viruses were prepared by propagating the A/Liaoning/1/2009 (H1N1) (LN/09) (GenBank accession numbers: JX403975-82) and A/swine/Nanchang/F9/2010 (H1N1) (Jia6/10) (GenBank accession numbers: JF275925-32) influenza viruses for one passage in MDCK cells for 40 to 48 h at 37 °C in a 5% CO<sub>2</sub> incubator. The infectious viral titers were determined using the Reed

and Muench method <sup>2</sup> and expressed as log<sub>10</sub> of the 50% tissue culture infective dose per 1.0 mL of fluid (TCID<sub>50</sub>/mL). Six-week-old female BALB/c mice were divided into 3 groups with 6 mice each group. One group of mice was infected with LN/09; the second group was infected with Jia6/10, and the final group was incubated with an equivalent PBS buffer. Each mouse was infected intranasally with 50 μL of a cellular virus stock fluid diluted in PBS to 10<sup>3</sup> TCID<sub>50</sub>. On day 3 and day 5 post-infection, three mice were euthanized and their lung tissues were harvested immediately after slaughter, cut into pieces, frozen and stored in liquid nitrogen. The animal studies were approved by Experimental Animal Center, Institute of Medicine, Hubei Province, China (No. 00018734).

### **RNA preparation and high-throughput sequencing**

The stored lung tissue was placed separately in liquid nitrogen, ground thoroughly to a fine powder and then lysed with TRIzol reagent (Invitrogen, USA). Total RNA was extracted using the RNeasy Mini Kit (QIAGEN, Germany) according to the manufacturer's protocol. The quality and concentration of the RNA were determined by an Agilent 2100 Bioanalyzer (260 nm/280 nm). The cDNA libraries were generated using the Illumina mRNA-SEQ kit and then clonally amplified on a cluster generation station using Illumina version 4 cluster generation reagents. The resulting libraries were then sequenced on a Genome Analyzer IIx using Illumina version 4.0 sequencing reagents, which generated single reads of 76 nucleotides. Image analysis, base calling and error estimation were performed using Illumina Analysis Pipeline software (version 2.6).

### **Bioinformatics analysis**

To systematically characterize the transcriptome of virus-infected tissue, we employed various publicly available tools for the mapping, assembly, and

quantification of transcripts, and we integrated these tools with additional informatics filtering steps to enrich the results for the most robust transcriptome construction. The details of the bioinformatics analysis are provided below.

### **Read alignment and assembly**

Due to the BALB/c mice genome sequence and related annotation are lacking at the moment. So we mapped the RNA-seq reads to the C57BL/6 (mm9) reference genome with a relatively relax criteria for read mapping which allowed maximum two mismatch. We retained transcripts corresponding to mRNAs, pseudogenes or long non-coding RNAs from the Ensembl (release 63, 2011-04-20), the RefSeq (release 37, 2011-03-04), the UCSC (2011-03-02) and the Vega (release 44, 2011-08-11) as the reference annotation information. And the RNA-seq reads from each sample were aligned to the mouse reference genome using TopHat software (version 1.3.2; allowing maximum two mismatches) as previously described <sup>3</sup>. Then, the aligned reads from TopHat mapping were subjected to the Cufflinks program (version 1.1.0; with default parameters) for ab initio transcript assembly <sup>4</sup>.

### **Discovery of splice junctions, NTRs and alternative spliced exons**

We prepared two databases of possible splice junctions in this study. The first database was based on the merged annotated transcripts and the second database was derived by identifying new junctions using TopHat based on RNA-seq data without relying on the genome annotations. And the identification of the splice junctions, the NTRs and the AS events had been performed as previous studies <sup>5,6</sup>.

### **Quantification of gene expression levels**

The gene expression levels were computed according to previous study and presented as RPKM value <sup>7</sup>. For hierarchical clustering analysis, the clustering software Cluster 3.0 <sup>8</sup> was used to perform the complete linkage hierarchical

clustering on both the genes and the samples, using uncentered Pearson's correlation as the distance measure. The clustering results were visualized using the Java Treeview program <sup>9</sup>.

### **Statistical analysis**

All of the statistical analyses were performed using the R language (<http://www.r-project.org/>). For the gene set analysis based on the GO term enrichment methods, GO::TermFinder <sup>10</sup> was used to detect the significantly enriched GO terms for the interested gene sets, which were compared to the genome-wide background with an adjusted P value (FDR) cutoff of 0.05.

### **Supplementary Results**

#### **Identification and description of the NTRs**

The RNA-seq has the greatest potential thus far to discover and annotate novel transcripts <sup>11</sup>. In the present study, 355 NTRs containing 622 multi-exon transcripts were identified based on the transcriptome data (Supplemental Table S1).

At first glance, the overall expression pattern of the NTRs demonstrated diversity across the Jia6/10- and LN/09-infected groups (Supplementary Fig. S2A). Notably, many of these regions were regulated by virus infection. As shown an example in Supplementary Fig. S2B, a novel transcript significantly increased in the virus-infected samples. The NTRs might closely relate to the virus infection and play a role in the interaction between the virus and the mouse lungs. Meanwhile, some NTRs also appeared in the non-influenza virus-infected mouse lungs, indicating that these NTRs might be associated with the normal biological development of mouse. Furthermore, we found that 77.6% of the NTRs only had two exons, and the NTRs had fewer exons per transcript (approximately 2.3) than the average protein-coding genes (approximately 7.7) (Supplementary Fig. S2C). We also observed that the novel

transcripts were (on average) approximately one-third the length of the protein-coding transcripts (median size of 453 bp for the NTRs versus 1,331 bp for the protein-coding transcripts) (Supplementary Fig. S2D). The structure and expression level features of the NTRs examined here were consistent with previous observation that NTRs had shorter exons and tissue-specific expression than the annotated protein-coding genes<sup>6</sup>.

### **Analysis of splice variants**

Alternative splicing (AS), through which a single gene could produce multiple mRNA and protein isoforms, is an important mechanism for the biodiversity of transcriptome and proteome<sup>12</sup>. It has been postulated as a principal contributor of the evolution of the phenotypic complexity in mammals<sup>5</sup>. To systemically investigate the splicing dynamics between the normal and the virus-infected tissues, a computational analysis was performed to categorize all of the splicing models into eight common types of AS events: 1) intron retention (IR), 2) cassette exons (CE), 3) mutually exclusive exons (MEE), 4) coordinate cassette exons (CCE), 5) alternative 5' splice sites (A5SS), 6) alternative 3' splice sites (A3SS), 7) alternative first exons (AFE) and 8) alternative last exons (ALE)<sup>13</sup> (Supplementary Fig. S3A). A total of 39,736 splicing events comprised of these eight AS events were identified with 11,250 multi-exonic genes containing at least one AS event. The predominated AS events observed in the annotated transcriptome were AFE (27.9%), followed by CE (17.7%), A3'SS (17.0%) and ALE (12.2%). Reads supporting both alternative isoforms were observed for 57.3% of these events (Supplementary Fig. S3A).

To assess the extent of the splicing changes upon influenza virus infection, a total of 337 splicing events from 261 genes that changed significantly in the virus-infected groups (false discovery rate (FDR) < 0.05; Supplementary Table S2)

were identified. Notably, although several events were constitutively identified in both the Jia6/10- and LN/09-infected mouse lungs, a higher frequency of virus-specific events was observed in the Jia6/10-infected tissue than in the LN/09-infected tissue and/or in the day 5 groups compared to the day 3 groups (Supplementary Fig. S3A), which suggested that Jia6/10 exerted a greater influence on the transcriptome or proteome complexity than the LN/09 virus, and the complexity was increasing along the process of virus infection.

As the two examples showed here, the splicing events involved the *Tnfrsf19* and the *Gbp5* genes were significantly activated by the virus infection. The *Tnfrsf19* gene splicing event involved an AFE model (Supplementary Fig. S3B), where the exon was preferentially included in the virus-infected cells. While, after the virus infection, an exon of the *Gbp5* gene was activated and the gene displayed a CE model for the second isoform (Supplementary Fig. S3C).

Collectively, most of the NTRs and AS events were regulated by virus infection and displayed distinct changing models and/or magnitude between Jia6/10 and LN/09 infected mouse lung tissues. The identified NTRs and AS events were important contributor to the transcriptome complexity and might closely relate to the pathogenicity of the viruses.

1. Zou, W. et al. Proteomics analysis of differential expression of chicken brain tissue proteins in response to the neurovirulent H5N1 avian influenza virus infection. *J Proteome Res* **9**, 3789-98 (2010).
2. Reed, L. & Muench., H. A simple method of estimating fifty percent endpoints. *Am.J.Hyg* **27**, 5 (1938).

3. Trapnell, C., Pachter, L. & Salzberg, S.L. TopHat: discovering splice junctions with RNA-Seq. *Bioinformatics* **25**, 1105-11 (2009).
4. Trapnell, C. et al. Transcript assembly and quantification by RNA-Seq reveals unannotated transcripts and isoform switching during cell differentiation. *Nat Biotechnol* **28**, 511-5 (2010).
5. Wang, E.T. et al. Alternative isoform regulation in human tissue transcriptomes. *Nature* **456**, 470-6 (2008).
6. Graveley, B.R. et al. The developmental transcriptome of *Drosophila melanogaster*. *Nature* **471**, 473-9 (2011).
7. Mortazavi, A., Williams, B.A., McCue, K., Schaeffer, L. & Wold, B. Mapping and quantifying mammalian transcriptomes by RNA-Seq. *Nat Methods* **5**, 621-8 (2008).
8. de Hoon, M.J., Imoto, S., Nolan, J. & Miyano, S. Open source clustering software. *Bioinformatics* **20**, 1453-4 (2004).
9. Saldanha, A.J. Java Treeview--extensible visualization of microarray data. *Bioinformatics* **20**, 3246-8 (2004).
10. Boyle, E.I. et al. GO::TermFinder--open source software for accessing Gene Ontology information and finding significantly enriched Gene Ontology terms associated with a list of genes. *Bioinformatics* **20**, 3710-5 (2004).
11. Wang, Z., Gerstein, M. & Snyder, M. RNA-Seq: a revolutionary tool for transcriptomics. *Nat Rev Genet* **10**, 57-63 (2009).
12. Nilsen, T.W. & Graveley, B.R. Expansion of the eukaryotic proteome by



alternative splicing. *Nature* **463**, 457-63 (2010).

13. Keren, H., Lev-Maor, G. & Ast, G. Alternative splicing and evolution: diversification, exon definition and function. *Nat Rev Genet* **11**, 345-55 (2010).

**The legends of the supplementary figures and tables:**

**Supplementary Fig.S1. Pathology analysis of the mouse lung tissues infected by Jia6/10 and LN/09 on day 3 and day5. HE staining. HM/06 is a highly pathogenic H5N1 avian influenza virus as a control.**

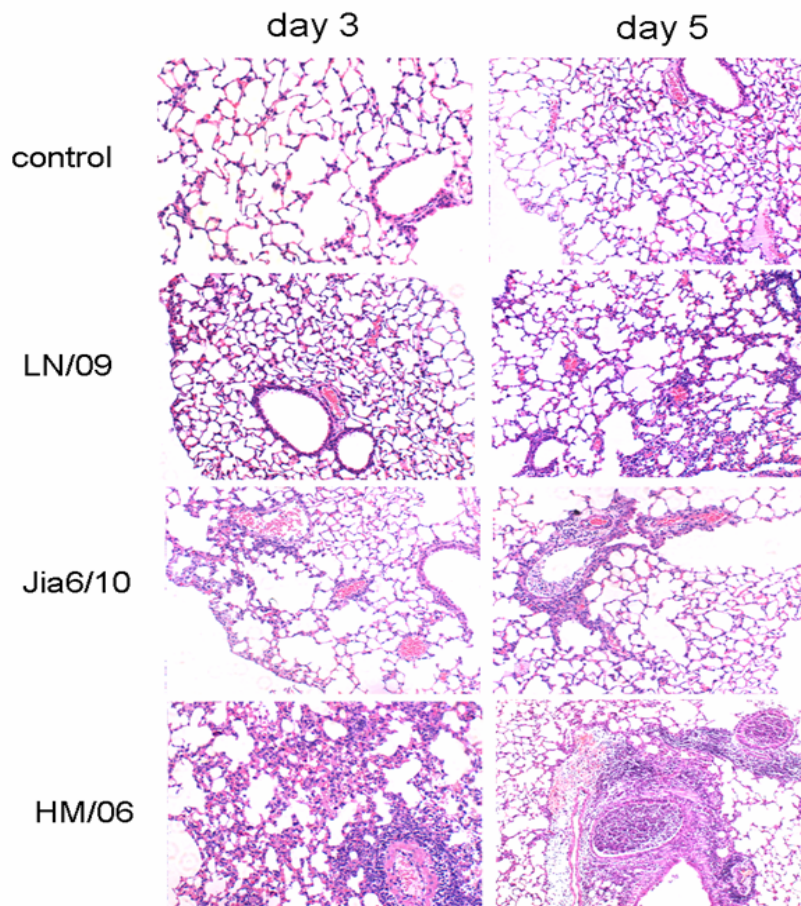

**Supplementary Fig. S2. Discovery of the NTRs after the Jia6/10 and LN/09 infection.**

**A.** Heat map showing the cluster analysis of expression levels (calculated as RPKM) of 355 NTRs. **B.** An example of the NTRs. This NTR is up-regulated after virus infection. The expression value of the NTR is shown on the right. #: number of; PC: protein-coding genes. **C.** The distribution of exon numbers of the NTRs identified in this study. The majority have two exons. **D.** The length distribution of annotated genes and the identified NTRs. The NTRs (median size 453 bp) are much smaller than annotated mice transcripts (median size 1,331 bp).

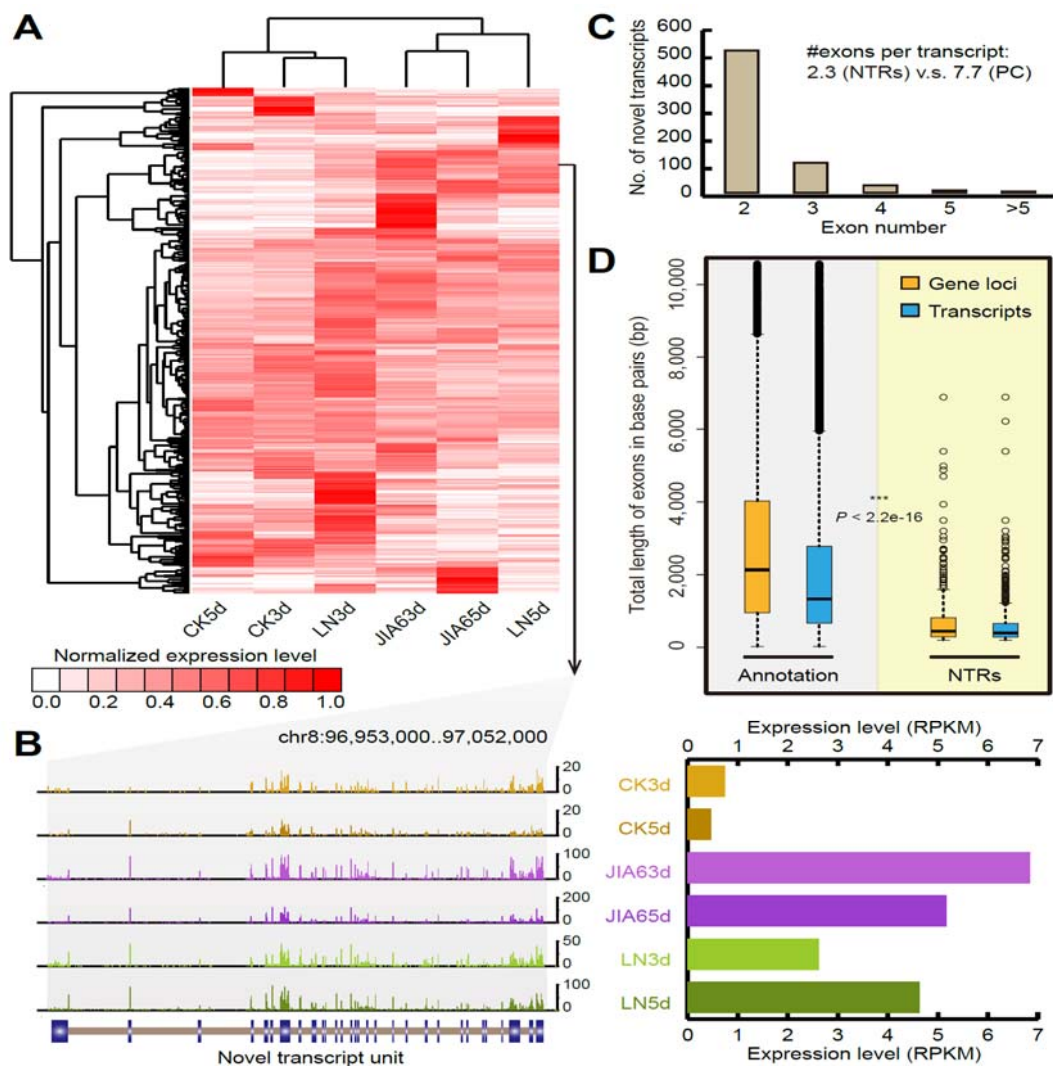

**Supplementary Fig. S3. AS dynamics affected by the Jia6/10 and LN/09 infection.**

**A.** Classification and analysis of the eight common types of AS events. Diagram represents the eight different AS event types (left). The number of events identified from the annotated transcriptome is listed in the middle (color background). The number of events with both isoforms detected by RNA-seq data (orange) and significantly changed after virus infection (colored stacked bar) is shown in the right bar chart. The significance is determined by Fisher's exact test (FDR > 5%). **B.** AS event of *Tnfrsf19* gene regulated by virus infection. Red arrow indicates the alternative first exon. **C.** AS event of *Gbp5* gene regulated by virus infection. Red arrow indicates the exon corresponding for alternative 5' or 3' splice sites. In both **B** and **C**, the RNA-seq data from each sample are indicated.

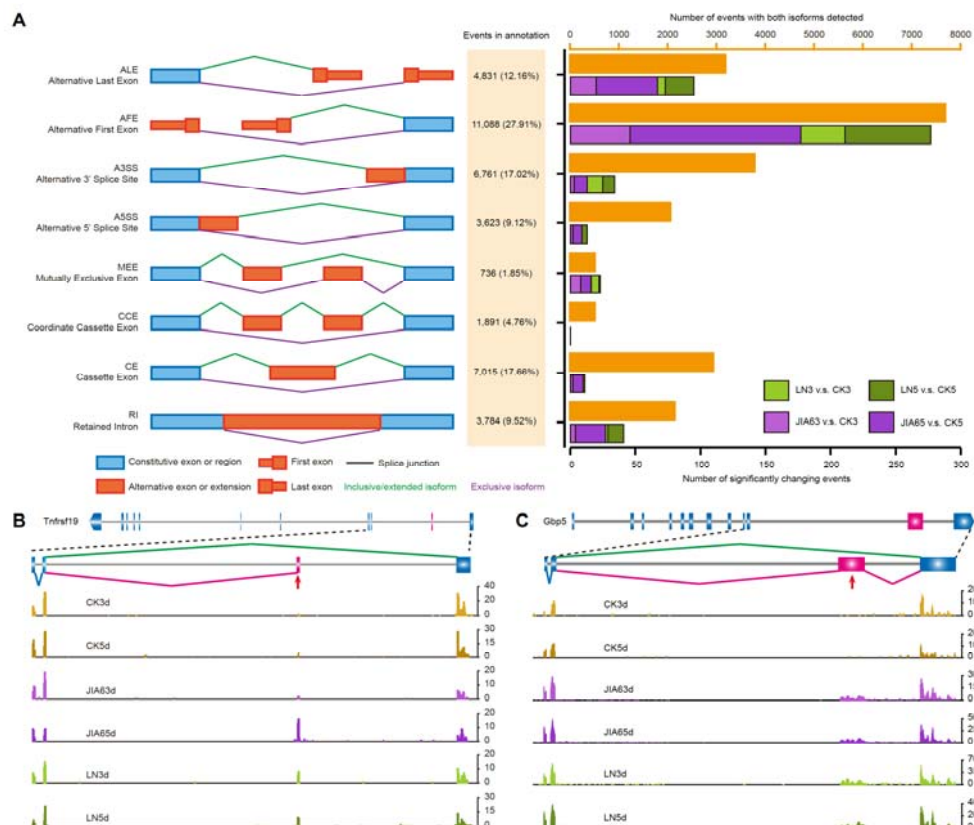

**Supplementary Table S1:** The expression level of NTRs after Jia6/10 and LN/09 infection.

**Supplementary Table S2:** The AS events significantly changed after the Jia6/10 and LN/09 viruses infection.

**Supplementary Table S3:** The differentially expressed genes after the Jia6/10 and LN/09 viruses infection.

**Supplementary Table S4:** The GO analysis of differentially expressed genes after Jia6/10 and LN/09 viruses infection.

**Supplementary Table S5:** The mutation sites of the Jia6/10 and LN/09 viruses genomes after they infected lung tissues.

**The legends of the Supplementary Tables for reviewing only:**

**Data not show:**

**Table S6:** Comparison of the expression levels of most chemokines and the oxidation factors of the lung tissues infected by the Jia6/10, LN/09 and HM/06.

**Table S1. Expression level of NTRs**

| ID        | Location                  | Length | CK3d        | CK5d     | JIA63d   | JIA65d   | LN3d     | LN5d     |
|-----------|---------------------------|--------|-------------|----------|----------|----------|----------|----------|
| NTR.g0001 | chr1:7696221-7698369      | 2149   | 2.207812364 | 16.57222 | 60.83755 | 21.8505  | 20.18989 | 8.796454 |
| NTR.g0002 | chr1:25072124-25075035    | 2912   | 32.79791848 | 5.755018 | 16.87682 | 16.28425 | 12.91559 | 9.780511 |
| NTR.g0004 | chr1:46695465-46696458    | 994    | 3.97063929  | 5.747973 | 1.400075 | 3.536733 | 3.682192 | 2.711996 |
| NTR.g0005 | chr1:46823478-46827067    | 3590   | 4.277736665 | 3.589874 | 0.874411 | 0.331328 | 1.724774 | 1.429116 |
| NTR.g0006 | chr1:46832025-46834725    | 2701   | 6.872907416 | 1.7455   | 0.850328 | 1.611012 | 2.096587 | 2.470675 |
| NTR.g0007 | chr1:46837513-46841480    | 3968   | 3.108665775 | 1.153888 | 1.405304 | 0.63899  | 1.385979 | 1.633275 |
| NTR.g0024 | chr1:184185449-184186183  | 735    | 3.104317991 | 0.998638 | 2.432453 | 1.843388 | 2.099128 | 3.092087 |
| NTR.g0026 | chr1:196921576-196922401  | 826    | 3.076351162 | 2.041135 | 3.163833 | 1.198825 | 5.34913  | 2.134018 |
| NTR.g0027 | chr1:4132745-4138030      | 5286   | 5.667634506 | 4.102288 | 1.665373 | 1.262071 | 2.874325 | 3.629124 |
| NTR.g0028 | chr1:4160282-4187722      | 27441  | 3.283413259 | 2.904692 | 2.572787 | 3.655757 | 2.537408 | 4.905715 |
| NTR.g0030 | chr1:16700141-16704350    | 4210   | 2.328238493 | 3.994551 | 4.256793 | 1.382541 | 3.29863  | 9.938851 |
| NTR.g0039 | chr1:84942001-84956263    | 14263  | 1.540699249 | 1.351725 | 13.41691 | 7.048804 | 7.793318 | 8.310912 |
| NTR.g0053 | chr1:166157113-166158850  | 1738   | 0.615639986 | 0.594141 | 2.411988 | 1.279515 | 1.427292 | 2.452857 |
| NTR.g0054 | chr1:172871694-172875672  | 3979   | 0           | 0.051428 | 16.53522 | 10.44241 | 4.787338 | 5.414047 |
| NTR.g0055 | chr1:172876375-172880283  | 3909   | 0.042898867 | 0.124202 | 12.65579 | 8.177139 | 3.729607 | 4.39507  |
| NTR.g0056 | chr1:173411409-173412844  | 1436   | 0           | 0        | 5.10573  | 5.719804 | 2.846163 | 3.708745 |
| NTR.g0057 | chr1:173413764-173417635  | 3872   | 0.674851737 | 0        | 10.57588 | 6.812521 | 2.346851 | 2.400689 |
| NTR.g0060 | chr10:8264611-8269490     | 4880   | 11.34270035 | 7.777852 | 16.25534 | 16.75002 | 21.22196 | 21.74655 |
| NTR.g0061 | chr10:22009734-22013438   | 3705   | 4.42951034  | 0.777242 | 1.419887 | 1.076034 | 2.333936 | 18.22123 |
| NTR.g0066 | chr10:85291952-85292527   | 576    | 4.226175482 | 6.525752 | 3.97381  | 3.513388 | 4.572359 | 2.886531 |
| NTR.g0068 | chr10:116758688-116766439 | 7752   | 9.007410863 | 2.984119 | 2.528219 | 1.676467 | 2.960975 | 2.639926 |
| NTR.g0072 | chr10:126507537-126508157 | 621    | 7.524904552 | 3.255438 | 5.489656 | 3.466858 | 6.9181   | 5.316832 |
| NTR.g0073 | chr10:8264612-8270302     | 5691   | 10.82901625 | 8.709051 | 19.5162  | 17.84442 | 25.31507 | 23.11361 |
| NTR.g0075 | chr10:19863576-19866523   | 2948   | 2.537499844 | 1.049524 | 0.852133 | 0.645773 | 0.630311 | 0.61898  |
| NTR.g0076 | chr10:25027613-25028652   | 1040   | 0.316180536 | 0.610279 | 0        | 0        | 4.398173 | 0        |
| NTR.g0080 | chr10:59431856-59447557   | 15702  | 6.294009267 | 6.315259 | 4.462107 | 3.159053 | 10.07539 | 3.369168 |
| NTR.g0081 | chr10:116462498-116464401 | 1904   | 1.885655004 | 9.926219 | 0.805933 | 0.458071 | 0.993563 | 1.902618 |
| NTR.g0084 | chr10:127987174-127992591 | 5418   | 6.628008132 | 5.628968 | 4.985774 | 5.431411 | 12.60036 | 4.979714 |
| NTR.g0086 | chr11:5454921-5463892     | 8972   | 13.73982164 | 12.96752 | 12.46812 | 14.93799 | 26.93556 | 15.8708  |
| NTR.g0088 | chr11:57906126-57906987   | 862    | 2.414026201 | 1.694347 | 5.674682 | 8.991847 | 2.035145 | 2.061013 |
| NTR.g0089 | chr11:59272427-59273602   | 1176   | 2.653950614 | 1.494076 | 0.51989  | 2.757918 | 3.332813 | 1.699389 |
| NTR.g0091 | chr11:68773016-68775447   | 2432   | 1.575597638 | 3.317622 | 4.377192 | 0.765501 | 3.15473  | 1.712062 |
| NTR.g0092 | chr11:72418722-72419859   | 1138   | 0.762220935 | 10.29845 | 0        | 0        | 1.767123 | 0        |
| NTR.g0093 | chr11:82812336-82815393   | 3058   | 1.475746809 | 0.897873 | 9.690735 | 9.401382 | 6.024556 | 6.874901 |
| NTR.g0094 | chr11:82837668-82840495   | 2828   | 1.404668774 | 1.287836 | 9.616996 | 8.038756 | 5.414041 | 5.666494 |
| NTR.g0097 | chr11:84684403-84684815   | 413    | 26.97415199 | 18.59443 | 17.41991 | 9.768996 | 28.1758  | 12.14748 |
| NTR.g0099 | chr11:86625171-86628697   | 3527   | 17.54629826 | 13.60667 | 44.25101 | 40.77994 | 35.47075 | 28.57194 |
| NTR.g0100 | chr11:86629161-86629890   | 730    | 44.326079   | 13.94252 | 45.15242 | 56.44489 | 33.87439 | 28.03266 |
| NTR.g0101 | chr11:87784620-87786115   | 1496   | 0.723463939 | 0.465467 | 0.566885 | 29.64262 | 0.279545 | 0.411779 |
| NTR.g0102 | chr11:88756882-88757892   | 1011   | 2.360426122 | 1.138999 | 3.699123 | 3.504136 | 3.192223 | 8.061003 |
| NTR.g0103 | chr11:94523029-94524478   | 1450   | 2.30207851  | 0.740563 | 1.127401 | 0.341752 | 5.11473  | 1.146504 |

|           |                           |       |             |          |          |          |          |          |
|-----------|---------------------------|-------|-------------|----------|----------|----------|----------|----------|
| NTR.g0110 | chr11:117837520-117842071 | 4552  | 0.83043526  | 1.282298 | 2.342538 | 7.100989 | 3.658014 | 5.388378 |
| NTR.g0112 | chr11:5453513-5457585     | 4073  | 19.20796757 | 22.6566  | 23.83044 | 25.12028 | 55.8411  | 24.33835 |
| NTR.g0114 | chr11:34602374-34608296   | 5923  | 0           | 0        | 0.384439 | 0.29134  | 0        | 4.46804  |
| NTR.g0115 | chr11:59449332-59454575   | 5244  | 4.984781747 | 4.104242 | 9.915054 | 11.17775 | 7.717905 | 10.02949 |
| NTR.g0116 | chr11:70598413-70599751   | 1339  | 0.350590327 | 0.338348 | 2.88448  | 1.71753  | 1.016005 | 1.795932 |
| NTR.g0117 | chr11:80221416-80227352   | 5937  | 4.832193099 | 1.165863 | 1.893183 | 0        | 1.400362 | 1.718984 |
| NTR.g0118 | chr11:86623471-86646161   | 22691 | 15.64464091 | 12.51611 | 39.8469  | 37.43107 | 32.03758 | 26.06872 |
| NTR.g0120 | chr11:89983044-89991713   | 8670  | 4.878213985 | 4.184768 | 0        | 0.241396 | 4.712329 | 0.462761 |
| NTR.g0122 | chr11:97146878-97148004   | 1127  | 1.001980572 | 2.320778 | 0.471074 | 2.141965 | 1.626085 | 3.079644 |
| NTR.g0124 | chr11:103514934-103515562 | 629   | 5.021690867 | 8.238762 | 0.295114 | 0.670939 | 2.6195   | 0        |
| NTR.g0128 | chr12:10489263-10495508   | 6246  | 1.095551512 | 1.057294 | 9.112696 | 11.25959 | 4.689069 | 4.388923 |
| NTR.g0129 | chr12:17879338-17882237   | 2900  | 7.880191823 | 1.640296 | 24.78956 | 20.36902 | 34.03112 | 16.4898  |
| NTR.g0130 | chr12:19123230-19126117   | 2888  | 16.37208803 | 4.51439  | 6.414346 | 2.083281 | 24.85269 | 0.998423 |
| NTR.g0131 | chr12:21549062-21560519   | 11458 | 10.59583856 | 7.204559 | 11.60476 | 7.185703 | 9.351547 | 10.99956 |
| NTR.g0132 | chr12:21995464-21996439   | 976   | 3.711684554 | 30.34224 | 13.6009  | 45.11822 | 3.290194 | 5.032973 |
| NTR.g0133 | chr12:22975914-22978327   | 2414  | 5.768158429 | 6.958414 | 44.06767 | 21.06507 | 18.72195 | 14.2815  |
| NTR.g0137 | chr12:57354186-57362486   | 8301  | 4.297084467 | 4.147028 | 7.744262 | 6.634341 | 3.984922 | 3.913284 |
| NTR.g0140 | chr12:60325417-60327359   | 1943  | 34.73336183 | 36.34748 | 90.50158 | 55.91158 | 73.24899 | 45.01715 |
| NTR.g0143 | chr12:114574673-114576753 | 2081  | 13.22614355 | 22.27947 | 11.58841 | 18.84929 | 18.95551 | 52.55926 |
| NTR.g0147 | chr12:19125754-19126544   | 791   | 19.45613252 | 8.813559 | 12.60067 | 9.902851 | 29.91781 | 68.47791 |
| NTR.g0148 | chr12:22977301-22977714   | 414   | 1.492460572 | 9.794332 | 40.69682 | 10.10318 | 7.958233 | 1.274212 |
| NTR.g0150 | chr12:25872393-25873906   | 1514  | 0.710222502 | 0.205626 | 2.337341 | 3.226312 | 1.564242 | 1.758454 |
| NTR.g0153 | chr12:57365993-57370455   | 4463  | 3.169631612 | 3.466806 | 2.856176 | 2.258607 | 3.674217 | 1.443265 |
| NTR.g0156 | chr12:70462165-70462470   | 306   | 4698.723249 | 9062.306 | 3743.686 | 3938.43  | 6160.591 | 4411.006 |
| NTR.g0159 | chr12:94121940-94130345   | 8406  | 3.316483609 | 2.607953 | 5.991448 | 5.087552 | 5.695476 | 6.239787 |
| NTR.g0163 | chr12:114574673-114576753 | 2081  | 12.72433865 | 21.43418 | 11.14874 | 18.13414 | 18.23633 | 50.56514 |
| NTR.g0166 | chr13:13435727-13440419   | 4693  | 5.871084676 | 6.738021 | 6.154604 | 10.60034 | 8.277232 | 11.3798  |
| NTR.g0167 | chr13:18073288-18073760   | 473   | 2.918589564 | 1.173613 | 2.001057 | 1.083187 | 3.665145 | 1.868844 |
| NTR.g0177 | chr13:51729997-51731048   | 1052  | 10.92884896 | 45.5719  | 42.65607 | 51.61152 | 54.02104 | 21.47816 |
| NTR.g0178 | chr13:51732535-51733999   | 1465  | 7.843709453 | 7.217719 | 34.94703 | 35.09527 | 13.74429 | 16.66386 |
| NTR.g0180 | chr13:55286340-55290436   | 4097  | 10.55282863 | 11.87    | 28.82706 | 26.38378 | 32.56448 | 19.57267 |
| NTR.g0185 | chr13:62393414-62394182   | 769   | 14.089987   | 26.39603 | 176.0798 | 44.84869 | 35.54834 | 43.51866 |
| NTR.g0189 | chr13:68232082-68233263   | 1182  | 13.58520299 | 5.66516  | 31.54065 | 28.2348  | 23.33019 | 30.78635 |
| NTR.g0190 | chr13:68352076-68355446   | 3371  | 4.917144909 | 2.572826 | 5.222348 | 6.754399 | 4.1891   | 3.793454 |
| NTR.g0191 | chr13:68373231-68375238   | 2008  | 12.0629748  | 10.07457 | 26.44797 | 15.08397 | 22.05063 | 14.85426 |
| NTR.g0192 | chr13:68435539-68438600   | 3062  | 3.394383489 | 4.258605 | 20.14753 | 9.372693 | 10.23034 | 6.520518 |
| NTR.g0193 | chr13:74584937-74585985   | 1049  | 3.088017605 | 3.268587 | 2.575789 | 1.330917 | 1.616598 | 1.275698 |
| NTR.g0194 | chr13:74644886-74645792   | 907   | 4.725207274 | 5.168227 | 5.553803 | 2.244716 | 5.112268 | 9.682128 |
| NTR.g0195 | chr13:74742945-74745280   | 2336  | 11.9020826  | 7.521587 | 8.095267 | 5.219997 | 8.684292 | 5.622402 |
| NTR.g0197 | chr13:87770308-87772329   | 2022  | 11.62468014 | 11.91991 | 168.2274 | 21.03227 | 26.52941 | 9.924753 |
| NTR.g0205 | chr13:51728130-51733990   | 5861  | 12.23888402 | 28.40616 | 43.15515 | 46.75904 | 38.92696 | 20.12107 |
| NTR.g0206 | chr13:55280843-55290427   | 9585  | 9.632777412 | 10.91316 | 27.32035 | 26.17558 | 31.15223 | 19.01086 |
| NTR.g0209 | chr13:62742260-62744270   | 2011  | 2.860681041 | 0.145304 | 1.061785 | 0.268218 | 2.61796  | 0.128545 |

|           |                           |       |             |          |          |          |          |          |
|-----------|---------------------------|-------|-------------|----------|----------|----------|----------|----------|
| NTR.g0213 | chr13:68374124-68376826   | 2703  | 8.021224338 | 10.5058  | 26.71209 | 20.41336 | 21.25292 | 11.08764 |
| NTR.g0214 | chr13:68582537-68588821   | 6285  | 0.424720123 | 0        | 1.497593 | 11.34922 | 0.492333 | 1.450446 |
| NTR.g0216 | chr13:74648591-74649037   | 447   | 6.246493518 | 6.69818  | 7.341856 | 2.472837 | 4.827264 | 3.555361 |
| NTR.g0217 | chr13:74693261-74693867   | 607   | 8.275541582 | 4.623795 | 5.375288 | 2.521726 | 7.825832 | 2.603032 |
| NTR.g0218 | chr13:74718307-74718792   | 486   | 8.357779206 | 5.473303 | 7.016693 | 2.126986 | 4.844142 | 3.567793 |
| NTR.g0219 | chr13:74746618-74747942   | 1325  | 6.374938731 | 6.687307 | 8.795925 | 2.715705 | 4.176837 | 3.31295  |
| NTR.g0220 | chr14:26199122-26199601   | 480   | 0.342846364 | 2.646992 | 0.402967 | 0.916142 | 0.794851 | 2.927105 |
| NTR.g0221 | chr14:32928487-32928773   | 287   | 12.2559089  | 15.90652 | 254.3238 | 79.05123 | 34.78258 | 20.92735 |
| NTR.g0222 | chr14:32929002-32934078   | 5077  | 12.34824244 | 11.45458 | 46.40015 | 28.46566 | 35.72092 | 21.46265 |
| NTR.g0241 | chr14:32930521-32934059   | 3539  | 16.38284311 | 15.91177 | 63.30382 | 37.25062 | 47.75025 | 29.31484 |
| NTR.g0244 | chr14:45167258-45168354   | 1097  | 0.529145112 | 0.340445 | 0.829245 | 14.76805 | 13.08547 | 1.807064 |
| NTR.g0245 | chr14:51085706-51086805   | 1100  | 1413.594191 | 1274.107 | 962.4036 | 600.4641 | 1563.365 | 840.0584 |
| NTR.g0246 | chr14:52974571-52989040   | 14470 | 19.17976203 | 10.16235 | 27.84731 | 12.72912 | 15.69392 | 10.5956  |
| NTR.g0249 | chr14:57284518-57286942   | 2425  | 3.121007872 | 2.126132 | 2.805168 | 1.635263 | 2.340963 | 0.783709 |
| NTR.g0251 | chr14:65729608-65768726   | 39119 | 4.353080469 | 5.368032 | 3.695193 | 6.031482 | 3.364042 | 3.510038 |
| NTR.g0256 | chr15:63900439-63901152   | 714   | 0.77962324  | 0.752398 | 3.894425 | 6.597056 | 0.903734 | 6.489752 |
| NTR.g0260 | chr15:82193642-82199998   | 6357  | 13.54025044 | 20.5445  | 35.65896 | 22.83127 | 15.86364 | 8.963792 |
| NTR.g0261 | chr15:83100387-83101397   | 1011  | 0.740191428 | 0.952458 | 28.12964 | 10.54887 | 0.858025 | 0.21065  |
| NTR.g0262 | chr15:85525308-85531506   | 6199  | 3.752472296 | 2.414289 | 2.572787 | 4.456542 | 5.799789 | 2.936754 |
| NTR.g0263 | chr15:89049431-89053162   | 3732  | 4.73331654  | 4.404883 | 2.185596 | 3.011475 | 4.311081 | 3.608164 |
| NTR.g0265 | chr15:101084621-101089736 | 5116  | 3.606093528 | 3.267095 | 7.957897 | 3.605333 | 7.336608 | 3.707077 |
| NTR.g0266 | chr15:25766620-25772743   | 6124  | 24.89921722 | 17.16409 | 44.02115 | 25.71933 | 33.71394 | 15.54163 |
| NTR.g0267 | chr15:38380580-38384985   | 4406  | 3.219212441 | 1.841064 | 3.223171 | 2.442618 | 4.422744 | 1.934097 |
| NTR.g0269 | chr15:63901581-63904484   | 2904  | 0.323775265 | 0.104156 | 3.932364 | 5.383345 | 0.875743 | 3.04071  |
| NTR.g0271 | chr15:74761794-74766207   | 4414  | 0.862310553 | 0.656999 | 4.160776 | 1.697857 | 6.313168 | 2.324877 |
| NTR.g0272 | chr15:75701432-75702720   | 1289  | 0.351311707 | 0        | 2.890415 | 0.625842 | 12.62439 | 0.299938 |
| NTR.g0273 | chr15:75716114-75716425   | 312   | 3.679687273 | 0.710238 | 0        | 0.327758 | 5.545111 | 1.570795 |
| NTR.g0275 | chr15:77720760-77732564   | 11805 | 9.714374402 | 24.43219 | 2.767964 | 3.146473 | 19.10931 | 14.82831 |
| NTR.g0278 | chr15:82191608-82197167   | 5560  | 27.32446565 | 36.35666 | 15.77294 | 16.12964 | 17.80511 | 16.42671 |
| NTR.g0279 | chr15:86026659-86043590   | 16932 | 1.835886984 | 1.771777 | 18.07176 | 2.044079 | 2.660186 | 0.391854 |
| NTR.g0281 | chr15:98438449-98454532   | 16084 | 4.753712004 | 3.440782 | 3.957675 | 1.764263 | 6.199282 | 3.213024 |
| NTR.g0284 | chr15:101087611-101090056 | 2446  | 3.642399776 | 1.757603 | 15.51905 | 2.636045 | 4.750027 | 0.388719 |
| NTR.g0285 | chr15:101227444-101229145 | 1702  | 2.649374837 | 1.136381 | 1.383982 | 1.704339 | 2.047426 | 1.633627 |
| NTR.g0292 | chr16:4430094-4437305     | 7212  | 1.696067776 | 2.728067 | 0        | 1.762511 | 0.983035 | 0.724022 |
| NTR.g0294 | chr16:10808296-10818909   | 10614 | 0           | 0        | 3.730063 | 2.261405 | 1.839385 | 3.251371 |
| NTR.g0302 | chr16:33300472-33303097   | 2626  | 0.404591207 | 0        | 0.951078 | 0        | 1.875998 | 4.145113 |
| NTR.g0308 | chr16:98154319-98165238   | 10920 | 0.845235096 | 1.223579 | 10.43125 | 2.258607 | 1.469687 | 0        |
| NTR.g0309 | chr16:98231960-98232706   | 747   | 2.871731475 | 4.787048 | 6.44377  | 1.627762 | 1.81576  | 3.343344 |
| NTR.g0311 | chr17:4880581-4881262     | 682   | 53.42314682 | 39.53909 | 84.0045  | 54.6586  | 70.08717 | 39.90949 |
| NTR.g0315 | chr17:19036604-19038275   | 1672  | 2.505177611 | 3.347578 | 5.209459 | 2.574709 | 2.010452 | 1.15168  |
| NTR.g0317 | chr17:24916732-24918194   | 1463  | 1.459294782 | 0.93889  | 6.289036 | 4.549387 | 2.255474 | 3.530038 |
| NTR.g0321 | chr17:32542618-32544819   | 2202  | 1.902259433 | 0.786785 | 2.600867 | 2.524285 | 3.690146 | 3.877914 |
| NTR.g0324 | chr17:43027610-43045159   | 17550 | 10.83696501 | 13.87356 | 21.31548 | 14.85336 | 20.1507  | 13.25523 |

|           |                          |       |             |          |          |          |          |          |
|-----------|--------------------------|-------|-------------|----------|----------|----------|----------|----------|
| NTR.g0325 | chr17:44242861-44243159  | 299   | 2.958322838 | 2.039298 | 4.967263 | 2.258607 | 6.368642 | 2.164898 |
| NTR.g0326 | chr17:46987899-46990689  | 2791  | 9.140122564 | 7.703625 | 8.73756  | 7.164345 | 12.14913 | 7.439359 |
| NTR.g0327 | chr17:52288540-52297884  | 9345  | 0.659218106 | 0.636198 | 6.585938 | 2.055128 | 1.146242 | 1.969862 |
| NTR.g0335 | chr17:4880894-4899893    | 19000 | 28.54195984 | 21.58953 | 25.08468 | 30.00364 | 34.87407 | 32.0518  |
| NTR.g0342 | chr17:15966584-15968042  | 1459  | 3.99666408  | 7.251345 | 1.691102 | 2.420741 | 2.038479 | 2.183817 |
| NTR.g0343 | chr17:17177141-17178277  | 1137  | 2.500339804 | 1.263966 | 5.037927 | 1.484737 | 2.76036  | 1.931399 |
| NTR.g0346 | chr17:21612179-21613132  | 954   | 9.138690691 | 9.680008 | 28.55592 | 12.90492 | 11.11027 | 10.8471  |
| NTR.g0347 | chr17:21613652-21614333  | 682   | 1.50208935  | 4.832118 | 11.76994 | 19.17718 | 6.674647 | 4.488513 |
| NTR.g0351 | chr17:22852692-22853907  | 1216  | 0.999634013 | 2.508288 | 2.584838 | 1.068474 | 3.244554 | 1.024144 |
| NTR.g0354 | chr17:25308948-25316671  | 7724  | 9.033729603 | 6.5387   | 2.919909 | 3.620941 | 4.450533 | 7.519871 |
| NTR.g0359 | chr17:35851847-35852186  | 340   | 2.266426852 | 1.458188 | 2.663859 | 5.719804 | 2.189356 | 0.967499 |
| NTR.g0361 | chr17:43028892-43031073  | 2182  | 30.14504636 | 44.00526 | 28.88087 | 22.11245 | 35.53124 | 31.79253 |
| NTR.g0363 | chr17:56691514-56694199  | 2686  | 5.371302257 | 4.754312 | 2.951138 | 2.123225 | 6.521119 | 2.930592 |
| NTR.g0364 | chr17:84435107-84437408  | 2302  | 0           | 0        | 2.447285 | 5.93481  | 0.965453 | 1.066608 |
| NTR.g0371 | chr18:61256374-61260655  | 4282  | 14.19926383 | 18.21552 | 6.105803 | 3.239016 | 11.24077 | 3.991668 |
| NTR.g0373 | chr18:90005355-90008388  | 3034  | 8.958448523 | 7.684991 | 29.38589 | 17.41926 | 17.57912 | 23.89505 |
| NTR.g0378 | chr18:60426051-60427812  | 1762  | 0           | 0.633751 | 4.888296 | 7.019054 | 2.791149 | 6.727837 |
| NTR.g0380 | chr18:90005386-90009954  | 4569  | 12.52443289 | 11.90932 | 36.36872 | 24.69036 | 26.10081 | 26.92889 |
| NTR.g0381 | chr19:3083592-3086107    | 2516  | 7.667378    | 5.111084 | 26.29246 | 10.34986 | 14.66058 | 23.55262 |
| NTR.g0382 | chr19:3138903-3142962    | 4060  | 1.869388571 | 2.405478 | 1.464799 | 1.665104 | 0.361164 | 11.17214 |
| NTR.g0384 | chr19:4059955-4061987    | 2033  | 9.428786733 | 2.459332 | 11.08219 | 11.5762  | 20.08718 | 14.79455 |
| NTR.g0385 | chr19:4062074-4065918    | 3845  | 12.60740478 | 8.889563 | 28.48769 | 20.6748  | 29.62536 | 22.2785  |
| NTR.g0387 | chr19:4178930-4179505    | 576   | 0.694054835 | 0        | 6.933975 | 1.236419 | 2.413632 | 2.666521 |
| NTR.g0388 | chr19:5512483-5517691    | 5209  | 3.564102663 | 4.58619  | 3.590649 | 5.744554 | 5.508647 | 3.62251  |
| NTR.g0389 | chr19:5574101-5576184    | 2084  | 0.733828751 | 11.80338 | 2.012524 | 1.307274 | 0.85065  | 1.044196 |
| NTR.g0398 | chr19:60822262-60829452  | 7191  | 2.042314468 | 1.182597 | 2.400447 | 2.182959 | 6.628826 | 3.138584 |
| NTR.g0399 | chr19:3083335-3096154    | 12820 | 5.625274211 | 3.51869  | 17.44755 | 6.402371 | 10.02268 | 14.63034 |
| NTR.g0400 | chr19:3225174-3228264    | 3091  | 2.210886455 | 1.927196 | 8.801641 | 14.42024 | 1.818794 | 1.400462 |
| NTR.g0401 | chr19:4061028-4072760    | 11733 | 17.04811269 | 9.216033 | 38.64396 | 25.80328 | 42.1244  | 28.45357 |
| NTR.g0406 | chr19:10250339-10253830  | 3492  | 14.93141543 | 15.03652 | 16.7867  | 12.43235 | 13.92197 | 9.699512 |
| NTR.g0408 | chr19:12614322-12615428  | 1107  | 1.480382857 | 0.238115 | 20.00974 | 10.54887 | 6.006176 | 4.42365  |
| NTR.g0413 | chr2:11451178-11452421   | 1244  | 1.061423114 | 0.951189 | 2.227769 | 1.080494 | 2.021363 | 1.294581 |
| NTR.g0414 | chr2:16679493-16685046   | 5554  | 6.673367952 | 6.075783 | 1.109941 | 0.448612 | 4.816584 | 1.719998 |
| NTR.g0415 | chr2:25114445-25115176   | 732   | 1.600663964 | 3.346997 | 1.254234 | 0.712873 | 1.546233 | 1.138827 |
| NTR.g0416 | chr2:30018137-30020317   | 2181  | 9.485416083 | 6.131573 | 3.576012 | 1.673831 | 11.51409 | 1.833583 |
| NTR.g0417 | chr2:30304940-30305993   | 1054  | 3.573575361 | 2.81012  | 2.80015  | 3.654624 | 5.523288 | 110.4009 |
| NTR.g0418 | chr2:51800470-51802313   | 1844  | 1.033877532 | 1.282852 | 2.256753 | 1.710237 | 3.595393 | 3.27856  |
| NTR.g0420 | chr2:75471541-75494070   | 22530 | 23.35497226 | 20.22767 | 63.1125  | 26.55168 | 56.76832 | 26.52942 |
| NTR.g0421 | chr2:81830528-81832032   | 1505  | 1.513630226 | 1.168619 | 4.981354 | 2.426801 | 15.79131 | 3.101485 |
| NTR.g0426 | chr2:164700383-164701799 | 1417  | 5.987787707 | 5.283374 | 2.412955 | 2.895301 | 8.329206 | 1.606681 |
| NTR.g0427 | chr2:164702686-164703322 | 637   | 5.507660951 | 6.053571 | 7.01292  | 5.042062 | 9.044631 | 5.747197 |
| NTR.g0430 | chr2:167596575-167598784 | 2210  | 4.48365256  | 5.538664 | 5.26989  | 3.833937 | 8.731668 | 2.603032 |
| NTR.g0432 | chr2:181595681-181598933 | 3253  | 4.923105525 | 3.133762 | 4.924599 | 1.866006 | 2.307017 | 2.861739 |



|           |                          |       |             |          |          |          |          |          |
|-----------|--------------------------|-------|-------------|----------|----------|----------|----------|----------|
| NTR.g0433 | chr2:17844739-17861975   | 17237 | 8.536874474 | 4.868359 | 4.104765 | 5.184529 | 7.646824 | 17.88993 |
| NTR.g0437 | chr2:34530150-34530479   | 330   | 3.384663889 | 1.814705 | 0.884041 | 2.009861 | 6.975077 | 0.321079 |
| NTR.g0439 | chr2:75473458-75494295   | 20838 | 29.90029667 | 24.92123 | 80.67032 | 33.3667  | 73.55453 | 34.23052 |
| NTR.g0441 | chr2:84582092-84583982   | 1891  | 5.741614691 | 2.989285 | 5.949286 | 5.316053 | 7.093514 | 4.514994 |
| NTR.g0443 | chr2:90079637-90081579   | 1943  | 7.132072346 | 5.631559 | 7.874683 | 8.855262 | 7.014808 | 4.612969 |
| NTR.g0445 | chr2:144028256-144045999 | 17744 | 0           | 0        | 7.905474 | 0.69127  | 0        | 1.104317 |
| NTR.g0449 | chr2:164359729-164366747 | 7019  | 4.595121668 | 5.47403  | 5.316517 | 3.709256 | 6.32538  | 2.942368 |
| NTR.g0450 | chr2:167396799-167398244 | 1446  | 3.921779906 | 3.108967 | 3.704054 | 1.372334 | 5.926169 | 1.853513 |
| NTR.g0451 | chr2:167399696-167403497 | 3802  | 6.243761915 | 3.918073 | 5.495757 | 3.29198  | 8.892994 | 4.470147 |
| NTR.g0452 | chr2:167596672-167597986 | 1315  | 3.968675572 | 2.852193 | 5.359337 | 3.083709 | 6.460225 | 2.523216 |
| NTR.g0453 | chr2:167848007-167875937 | 27931 | 2.307263371 | 1.484462 | 1.807905 | 0        | 4.903369 | 1.313242 |
| NTR.g0454 | chr2:167887361-167889273 | 1913  | 5.899555561 | 3.253672 | 3.254993 | 3.11023  | 3.349808 | 2.672789 |
| NTR.g0455 | chr2:174436860-174439680 | 2821  | 1.52990582  | 1.771777 | 1.438548 | 4.088159 | 1.773457 | 3.396071 |
| NTR.g0456 | chr2:175785039-175787855 | 2817  | 5.718480509 | 5.518788 | 2.160403 | 2.546786 | 7.575801 | 1.918024 |
| NTR.g0465 | chr3:87834783-87837047   | 2265  | 13.36319257 | 7.825572 | 4.574713 | 1.444524 | 12.10667 | 3.655322 |
| NTR.g0467 | chr3:91917112-91922658   | 5547  | 8.90804293  | 3.940277 | 6.543828 | 0        | 9.035378 | 2.535127 |
| NTR.g0468 | chr3:95786350-95787343   | 994   | 16.29259704 | 14.96978 | 23.21562 | 17.29532 | 21.21472 | 16.38719 |
| NTR.g0479 | chr3:102809851-102811419 | 1569  | 5.863237963 | 3.545987 | 2.940328 | 2.854972 | 5.618546 | 2.803266 |
| NTR.g0483 | chr3:107122111-107123256 | 1146  | 4.7025156   | 0.3491   | 0        | 0.644405 | 0.419317 | 0        |
| NTR.g0486 | chr3:6138572-6138967     | 396   | 10.73820689 | 12.43587 | 6.941671 | 8.608274 | 12.13647 | 9.626308 |
| NTR.g0487 | chr3:47285957-47289093   | 3137  | 9.552808026 | 8.926545 | 10.87151 | 5.942716 | 16.34667 | 6.213988 |
| NTR.g0488 | chr3:57430865-57431207   | 343   | 5.979133873 | 8.01436  | 4.294653 | 3.25462  | 6.160866 | 4.253983 |
| NTR.g0489 | chr3:87839964-87843464   | 3501  | 1.497697276 | 1.156317 | 1.408263 | 0.266806 | 8.333381 | 2.301629 |
| NTR.g0490 | chr3:88468690-88470128   | 1439  | 2.683747964 | 2.651697 | 3.15436  | 1.13832  | 6.073825 | 0.872873 |
| NTR.g0491 | chr3:89667388-89669162   | 1775  | 2.032589161 | 1.634675 | 0.597254 | 2.263088 | 3.730594 | 1.446129 |
| NTR.g0493 | chr3:115396681-115397363 | 683   | 0.847332454 | 4.702023 | 0.995918 | 0.566053 | 4.420001 | 2.531982 |
| NTR.g0497 | chr3:143889413-143895035 | 5623  | 3.962959137 | 4.461999 | 3.881575 | 1.617867 | 4.402427 | 4.511251 |
| NTR.g0498 | chr3:145317134-145319902 | 2769  | 5.044516735 | 0        | 0.456085 | 0        | 0.449813 | 0        |
| NTR.g0500 | chr4:8320420-8323731     | 3312  | 4.028637392 | 5.230225 | 12.45778 | 21.27404 | 6.949361 | 16.66526 |
| NTR.g0503 | chr4:55434205-55435621   | 1417  | 70.57713056 | 53.42959 | 190.7429 | 118.5768 | 48.49966 | 124.1208 |
| NTR.g0505 | chr4:115329070-115330220 | 1151  | 1.397197132 | 5.932987 | 0.328441 | 1.86677  | 2.429433 | 0.954303 |
| NTR.g0507 | chr4:126720745-126722124 | 1380  | 2.179627525 | 2.454099 | 0.853946 | 2.103227 | 3.368814 | 0.930446 |
| NTR.g0508 | chr4:128594579-128598389 | 3811  | 1.267068568 | 2.445644 | 3.536986 | 1.128605 | 3.121153 | 1.757892 |
| NTR.g0509 | chr4:129073404-129075828 | 2425  | 2.174999866 | 1.443095 | 0.6391   | 0.726494 | 3.624291 | 0.92847  |
| NTR.g0510 | chr4:134850618-134851401 | 784   | 2.478047743 | 1.91321  | 0.582518 | 1.213987 | 1.579895 | 0.317351 |
| NTR.g0511 | chr4:138520662-138522356 | 1695  | 8.310231789 | 3.64547  | 4.143781 | 2.467367 | 6.714026 | 1.719998 |
| NTR.g0515 | chr4:144534793-144550399 | 15607 | 6.335961524 | 5.79288  | 6.663117 | 0.891091 | 7.731164 | 1.423533 |
| NTR.g0516 | chr4:148808421-148808995 | 575   | 16.8387891  | 31.36776 | 16.56969 | 19.88195 | 15.8879  | 25.74375 |
| NTR.g0517 | chr4:148809329-148812118 | 2790  | 22.29780646 | 19.13668 | 33.97663 | 27.02532 | 35.63259 | 24.47627 |
| NTR.g0518 | chr4:148813024-148813305 | 282   | 3.641320866 | 1.561851 | 0.475539 | 4.324536 | 3.751996 | 10.70821 |
| NTR.g0520 | chr4:154213452-154229919 | 16468 | 1.358139121 | 2.246935 | 1.596298 | 2.592264 | 5.622665 | 3.97554  |
| NTR.g0523 | chr4:4896529-4904423     | 7895  | 4.136811419 | 1.451764 | 6.18829  | 1.004931 | 1.743769 | 1.605394 |
| NTR.g0524 | chr4:8320826-8322832     | 2007  | 4.282524489 | 5.818796 | 12.31881 | 24.6941  | 7.577051 | 5.051429 |

|           |                          |       |             |          |          |          |          |          |
|-----------|--------------------------|-------|-------------|----------|----------|----------|----------|----------|
| NTR.g0525 | chr4:8323623-8324916     | 1294  | 4.015298833 | 10.10891 | 15.38937 | 5.753519 | 10.92798 | 44.41657 |
| NTR.g0527 | chr4:42325741-42334734   | 8994  | 8.316239548 | 9.991342 | 9.375585 | 7.860968 | 13.77162 | 9.418527 |
| NTR.g0528 | chr4:42582082-42583615   | 1534  | 4.717345966 | 5.140048 | 19.4954  | 10.43683 | 21.52047 | 20.39738 |
| NTR.g0530 | chr4:106722729-106727945 | 5217  | 4.742708041 | 0.871827 | 1.061785 | 0.60349  | 6.283105 | 0.385634 |
| NTR.g0532 | chr4:126718143-126718897 | 755   | 1.620925533 | 2.085763 | 2.222693 | 1.082845 | 11.58696 | 1.729863 |
| NTR.g0535 | chr4:133819166-133822108 | 2943  | 0.394312909 | 0.190272 | 3.244207 | 1.22928  | 1.142713 | 2.18823  |
| NTR.g0536 | chr4:135498348-135500965 | 2618  | 0.412409395 | 0.398008 | 1.938912 | 0        | 6.21481  | 1.056303 |
| NTR.g0537 | chr4:138894013-138894328 | 316   | 3466.640595 | 7137.999 | 3068.003 | 5957.64  | 4336.728 | 5939.119 |
| NTR.g0538 | chr4:143566128-143571636 | 5509  | 22.90969139 | 4.538301 | 31.46214 | 7.195852 | 80.92826 | 41.69264 |
| NTR.g0539 | chr4:148808261-148809633 | 1373  | 25.33424979 | 23.85685 | 44.75539 | 8.068967 | 49.30147 | 8.520717 |
| NTR.g0540 | chr4:148809760-148812772 | 3013  | 41.20173421 | 38.70863 | 66.58674 | 51.57358 | 71.64118 | 43.17132 |
| NTR.g0541 | chr4:149350833-149352763 | 1931  | 26.44896103 | 27.69044 | 20.95594 | 8.729322 | 37.09248 | 12.50032 |
| NTR.g0543 | chr5:34654336-34657027   | 2692  | 5.377558724 | 2.919246 | 0.395034 | 0.299369 | 2.727214 | 1.434742 |
| NTR.g0545 | chr5:34833203-34835948   | 2746  | 2.242007438 | 0.16644  | 0.202704 | 0.153616 | 2.598921 | 0.441727 |
| NTR.g0546 | chr5:94946835-94949755   | 2921  | 5.553203903 | 8.629354 | 13.82838 | 35.71437 | 21.60294 | 6.428658 |
| NTR.g0547 | chr5:105627420-105630267 | 2848  | 33.41836983 | 17.00527 | 244.2408 | 325.8073 | 83.81573 | 260.155  |
| NTR.g0548 | chr5:110263626-110264038 | 413   | 1.309336576 | 0        | 4.001237 | 0.233251 | 1.82133  | 0.67072  |
| NTR.g0549 | chr5:110335174-110336601 | 1428  | 1.330421996 | 0.855975 | 1.82434  | 3.357599 | 3.598506 | 5.490032 |
| NTR.g0552 | chr5:115337016-115343599 | 6584  | 81.80346074 | 44.15671 | 264.9314 | 80.80326 | 249.1193 | 87.25896 |
| NTR.g0553 | chr5:120282157-120283393 | 1237  | 5.166408183 | 3.086568 | 4.048247 | 3.72529  | 4.943192 | 2.59053  |
| NTR.g0554 | chr5:122896142-122898664 | 2523  | 1.313365304 | 1.267502 | 1.764197 | 0.16712  | 3.044889 | 0.800933 |
| NTR.g0555 | chr5:123482211-123483805 | 1595  | 2.658542224 | 1.425391 | 0.867982 | 1.841793 | 4.280229 | 1.387083 |
| NTR.g0556 | chr5:136100895-136103209 | 2315  | 14.51424728 | 20.33332 | 46.22551 | 20.99086 | 25.5086  | 52.76494 |
| NTR.g0557 | chr5:143691010-143695533 | 4524  | 0           | 0        | 8.625103 | 0.871516 | 10.77489 | 0.208839 |
| NTR.g0560 | chr5:34836231-34837491   | 1261  | 4.568227143 | 2.755439 | 1.342324 | 2.797449 | 1.323865 | 1.706336 |
| NTR.g0561 | chr5:52767172-52795418   | 28247 | 6.785188147 | 7.750984 | 3.580619 | 5.612017 | 8.025864 | 5.615625 |
| NTR.g0562 | chr5:52796276-52812050   | 15775 | 5.048689205 | 8.194468 | 8.631286 | 5.723422 | 7.714538 | 4.11447  |
| NTR.g0564 | chr5:74345960-74346345   | 386   | 8.702639027 | 3.199519 | 1.948324 | 0.369125 | 2.401915 | 0.70762  |
| NTR.g0565 | chr5:94945538-94946646   | 1109  | 12.74160369 | 11.98924 | 13.85273 | 19.29367 | 22.15498 | 10.60639 |
| NTR.g0566 | chr5:94947297-94950207   | 2911  | 4.169171255 | 6.258904 | 10.18943 | 23.10665 | 15.72603 | 4.858994 |
| NTR.g0572 | chr5:110476405-110478106 | 1702  | 3.508304579 | 3.385793 | 3.298807 | 2.916593 | 1.355601 | 2.396216 |
| NTR.g0573 | chr5:113604192-113650324 | 46133 | 9.671814875 | 12.78685 | 4.848933 | 4.711507 | 8.076253 | 6.196752 |
| NTR.g0574 | chr5:115340808-115344104 | 3297  | 18.27554196 | 11.55826 | 59.13164 | 18.78846 | 58.79888 | 18.92885 |
| NTR.g0576 | chr5:123974419-123975458 | 1040  | 2.377357449 | 1.66861  | 0.762066 | 1.34754  | 2.755818 | 1.47615  |
| NTR.g0577 | chr5:136097174-136102642 | 5469  | 5.958123952 | 3.953168 | 20.02397 | 6.385017 | 8.309526 | 25.9111  |
| NTR.g0578 | chr5:141065183-141072518 | 7336  | 2.520110546 | 1.216053 | 3.332282 | 1.402947 | 4.381944 | 2.958428 |
| NTR.g0579 | chr5:141094391-141096280 | 1890  | 0           | 3.661672 | 0.24775  | 0.187752 | 1.221715 | 0.899814 |
| NTR.g0587 | chr6:41147514-41151260   | 3747  | 13.54207202 | 9.3269   | 35.2693  | 20.51107 | 28.56047 | 18.89609 |
| NTR.g0590 | chr6:47696784-47698653   | 1870  | 27.36701387 | 15.37377 | 27.3651  | 95.32256 | 60.60641 | 11.85687 |
| NTR.g0591 | chr6:47707570-47713406   | 5837  | 122.468246  | 65.06312 | 68.92425 | 100.5572 | 129.0165 | 50.74697 |
| NTR.g0593 | chr6:60840520-60841841   | 1322  | 2.579824704 | 5.432151 | 7.994018 | 8.564917 | 11.14647 | 5.806764 |
| NTR.g0594 | chr6:68101866-68102613   | 748   | 2.264422938 | 5.0263   | 1.064602 | 3.630545 | 2.099924 | 6.186517 |
| NTR.g0595 | chr6:68630368-68630840   | 473   | 10.97598147 | 18.59606 | 3.440184 | 5.214154 | 6.785753 | 12.49456 |

|           |                          |       |             |          |          |          |          |          |
|-----------|--------------------------|-------|-------------|----------|----------|----------|----------|----------|
| NTR.g0598 | chr6:70703132-70709444   | 6313  | 0           | 0        | 0.946592 | 5.738849 | 0.933575 | 0        |
| NTR.g0603 | chr6:126758414-126762783 | 4370  | 1.657645529 | 0.79988  | 0        | 0        | 4.80383  | 0.35381  |
| NTR.g0604 | chr6:127581677-127621350 | 39674 | 10.3785169  | 8.265028 | 7.826632 | 5.187834 | 15.39594 | 7.265254 |
| NTR.g0605 | chr6:128871337-128875241 | 3905  | 2.278837129 | 0.338348 | 2.678446 | 3.278922 | 8.331242 | 3.292542 |
| NTR.g0606 | chr6:133670837-133672275 | 1439  | 5.736239765 | 27.02835 | 35.69361 | 17.43204 | 12.1254  | 9.794809 |
| NTR.g0609 | chr6:148583715-148584401 | 687   | 27.16278242 | 51.92917 | 14.89878 | 15.43837 | 85.76438 | 12.14748 |
| NTR.g0612 | chr6:41148343-41151677   | 3335  | 11.52430433 | 7.812883 | 38.13542 | 22.65074 | 25.98177 | 17.50972 |
| NTR.g0614 | chr6:47581162-47600970   | 19809 | 166.8247554 | 250.939  | 134.6211 | 49.42584 | 385.5274 | 125.1191 |
| NTR.g0617 | chr6:60840522-60842596   | 2075  | 3.05981164  | 6.791811 | 8.990923 | 10.62921 | 14.18766 | 7.57585  |
| NTR.g0618 | chr6:69893176-69893676   | 501   | 1.773895995 | 1.069969 | 1.04248  | 1.382541 | 0.771108 | 6.815212 |
| NTR.g0619 | chr6:70088584-70089095   | 512   | 6.456459687 | 7.269496 | 6.745459 | 13.41878 | 2.078969 | 11.33085 |
| NTR.g0620 | chr6:83403287-83406579   | 3293  | 6.355419629 | 8.354801 | 5.249107 | 7.099084 | 8.561837 | 7.068516 |
| NTR.g0629 | chr6:128748835-128762435 | 13601 | 140.783544  | 594.7808 | 153.5886 | 65.70101 | 186.633  | 73.84392 |
| NTR.g0631 | chr6:149251298-149253744 | 2447  | 0.992659823 | 0.319332 | 1.555639 | 0.884183 | 0.383562 | 4.802494 |
| NTR.g0633 | chr7:4299335-4304439     | 5105  | 0           | 0        | 12.60293 | 0.367342 | 0        | 0        |
| NTR.g0634 | chr7:11725469-11727489   | 2021  | 4.671921354 | 6.558218 | 12.97914 | 19.67198 | 5.415661 | 19.21841 |
| NTR.g0635 | chr7:18123738-18125574   | 1837  | 13.81948348 | 13.3369  | 20.95848 | 28.58936 | 29.71351 | 20.1718  |
| NTR.g0636 | chr7:18126526-18127791   | 1266  | 6.804755016 | 10.94522 | 28.11423 | 19.46912 | 31.07405 | 17.95715 |
| NTR.g0637 | chr7:20055042-20059472   | 4431  | 1.848535811 | 1.297443 | 1.777654 | 2.694322 | 3.311617 | 2.295588 |
| NTR.g0638 | chr7:20063692-20065429   | 1738  | 2.070939899 | 0.888276 | 1.081819 | 2.254548 | 1.867149 | 0.589366 |
| NTR.g0639 | chr7:23560464-23563096   | 2633  | 7.970310252 | 6.672563 | 8.803621 | 7.099324 | 13.24647 | 17.05294 |
| NTR.g0640 | chr7:26715832-26717501   | 1670  | 4.882441207 | 6.853736 | 4.347431 | 3.426401 | 6.517224 | 3.031608 |
| NTR.g0641 | chr7:26772976-26773363   | 388   | 17.84982845 | 21.72037 | 29.64553 | 19.70121 | 19.34197 | 22.85936 |
| NTR.g0643 | chr7:29042049-29049394   | 7346  | 4.43369307  | 3.889878 | 11.13295 | 9.478043 | 10.74625 | 8.740683 |
| NTR.g0644 | chr7:29065699-29067731   | 2033  | 4.814723131 | 2.680725 | 6.311979 | 4.783412 | 5.151873 | 0.94861  |
| NTR.g0645 | chr7:30741367-30742061   | 695   | 9.279211385 | 11.5138  | 8.101883 | 4.722966 | 20.89815 | 8.374974 |
| NTR.g0646 | chr7:31981873-31993776   | 11904 | 1.231279972 | 0.792189 | 0        | 0.731151 | 4.75764  | 1.752041 |
| NTR.g0650 | chr7:55995527-55996190   | 664   | 3.83348422  | 4.695667 | 6.585269 | 9.981038 | 4.956491 | 5.412869 |
| NTR.g0652 | chr7:71146772-71163807   | 17036 | 3.516610224 | 3.042725 | 5.273483 | 4.104418 | 8.152864 | 4.348247 |
| NTR.g0653 | chr7:71165695-71167319   | 1625  | 2.360426122 | 2.404554 | 5.240424 | 2.5697   | 8.664604 | 1.791334 |
| NTR.g0663 | chr7:136811360-136838129 | 26770 | 14.29250478 | 11.52274 | 6.645221 | 2.815129 | 12.82273 | 7.315474 |
| NTR.g0666 | chr7:18123790-18144772   | 20983 | 6.059576871 | 9.803955 | 23.88019 | 19.04962 | 30.57603 | 14.91173 |
| NTR.g0668 | chr7:26231593-26233426   | 1834  | 0           | 0        | 0        | 9.757313 | 5.692326 | 0        |
| NTR.g0669 | chr7:26712190-26716317   | 4128  | 15.7696327  | 22.31517 | 7.881426 | 13.22251 | 14.63477 | 12.43702 |
| NTR.g0673 | chr7:29041767-29046477   | 4711  | 9.062385592 | 8.901175 | 21.36609 | 17.14716 | 18.77235 | 14.65023 |
| NTR.g0674 | chr7:31196263-31198540   | 2278  | 1.038970524 | 1.086247 | 8.039308 | 6.092435 | 2.709828 | 4.509107 |
| NTR.g0678 | chr7:51343991-51348092   | 4102  | 0.759959152 | 1.955789 | 6.550301 | 2.030735 | 4.404699 | 1.946481 |
| NTR.g0682 | chr7:71159175-71161275   | 2101  | 1.996929702 | 0.688284 | 2.514754 | 1.905758 | 2.066811 | 2.070248 |
| NTR.g0683 | chr7:82919005-82927181   | 8177  | 29.98201919 | 34.94471 | 48.12817 | 61.34448 | 40.5211  | 56.69179 |
| NTR.g0685 | chr7:88125480-88138116   | 12637 | 4.126155996 | 3.020879 | 2.675699 | 1.013863 | 2.638904 | 4.130145 |
| NTR.g0687 | chr7:108135695-108140708 | 5014  | 4.415624728 | 1.988667 | 4.151946 | 1.573236 | 3.412376 | 2.010618 |
| NTR.g0689 | chr7:121685194-121692014 | 6821  | 0           | 0        | 4.894571 | 0.309105 | 0        | 0        |
| NTR.g0690 | chr7:133491728-133495107 | 3380  | 12.65466099 | 9.886514 | 4.013548 | 2.862673 | 8.84809  | 4.287347 |

|           |                          |       |             |          |          |          |          |          |
|-----------|--------------------------|-------|-------------|----------|----------|----------|----------|----------|
| NTR.g0691 | chr7:134597601-134598747 | 1147  | 2.95247635  | 4.070535 | 2.478723 | 2.404419 | 3.813634 | 3.31295  |
| NTR.g0693 | chr7:136796511-136801528 | 5018  | 11.17512583 | 7.1158   | 2.572787 | 0.307853 | 12.82059 | 0.983602 |
| NTR.g0694 | chr7:146078700-146082129 | 3430  | 2.746447552 | 2.65054  | 2.286539 | 2.344389 | 2.918359 | 2.149421 |
| NTR.g0700 | chr8:19704045-19707103   | 3059  | 7.547846334 | 5.470181 | 5.846293 | 3.477428 | 10.02328 | 3.876331 |
| NTR.g0701 | chr8:28361092-28369463   | 8372  | 1.842490894 | 3.852658 | 0        | 0.273524 | 4.271607 | 0.262176 |
| NTR.g0702 | chr8:34824611-34828545   | 3935  | 10.95258476 | 4.149017 | 12.63257 | 11.67037 | 29.18932 | 6.729182 |
| NTR.g0703 | chr8:72238919-72239630   | 712   | 3.698284971 | 5.204994 | 3.984569 | 9.607911 | 5.180159 | 5.262448 |
| NTR.g0705 | chr8:74750482-74761508   | 11027 | 11.15177296 | 20.90617 | 35.25414 | 71.58697 | 13.67    | 73.21322 |
| NTR.g0706 | chr8:86118994-86121158   | 2165  | 5.711289261 | 0        | 0        | 0        | 0.696894 | 0.256637 |
| NTR.g0707 | chr8:87662538-87664357   | 1820  | 2.456654525 | 1.185433 | 77.23915 | 20.51432 | 22.06997 | 4.456991 |
| NTR.g0708 | chr8:96969954-96994392   | 24439 | 5.415548975 | 4.181148 | 57.634   | 45.60631 | 23.39859 | 39.84711 |
| NTR.g0709 | chr8:108090081-108090462 | 382   | 1.778515515 | 2.574613 | 1.741991 | 0.792081 | 4.466895 | 1.01229  |
| NTR.g0710 | chr8:109201195-109204474 | 3280  | 22.54375699 | 21.75652 | 20.30984 | 16.20686 | 48.81619 | 38.78728 |
| NTR.g0713 | chr8:19853138-19854496   | 1359  | 10.38026666 | 8.636019 | 7.152025 | 5.260612 | 15.35211 | 7.33433  |
| NTR.g0714 | chr8:47814473-47815562   | 1090  | 3.532499783 | 2.083365 | 5.074601 | 3.758287 | 5.687293 | 3.93746  |
| NTR.g0717 | chr8:70644979-70729547   | 84569 | 4.472322529 | 2.411964 | 1.700656 | 1.405974 | 4.421892 | 2.807585 |
| NTR.g0723 | chr8:74750226-74761508   | 11283 | 9.47288581  | 17.52233 | 26.64211 | 60.87198 | 8.627857 | 62.19769 |
| NTR.g0724 | chr8:74848161-74852947   | 4787  | 0           | 0.659101 | 0.53514  | 2.433272 | 0.527781 | 0.388719 |
| NTR.g0725 | chr8:75078316-75081011   | 2696  | 4.55299972  | 1.098502 | 1.04055  | 0.337954 | 2.638904 | 0.539888 |
| NTR.g0726 | chr8:86724775-86731411   | 6637  | 8.723697766 | 10.57349 | 7.145783 | 8.983183 | 11.45222 | 9.286337 |
| NTR.g0728 | chr8:87654768-87664157   | 9390  | 3.236729659 | 3.123701 | 52.78482 | 16.75758 | 19.69798 | 6.390383 |
| NTR.g0729 | chr8:90905284-90912748   | 7465  | 9.493186237 | 7.187615 | 7.376939 | 4.002092 | 17.77329 | 5.358526 |
| NTR.g0730 | chr8:94677544-94682174   | 4631  | 6.470491655 | 4.633045 | 6.869153 | 3.160577 | 5.322973 | 3.742257 |
| NTR.g0731 | chr8:109202278-109204365 | 2088  | 21.72835361 | 20.17453 | 19.00263 | 15.50147 | 47.98731 | 31.12335 |
| NTR.g0734 | chr9:20816640-20817860   | 1221  | 0.77140432  | 0.744466 | 3.02225  | 1.145177 | 3.576828 | 0.439066 |
| NTR.g0740 | chr9:95956708-95959465   | 2758  | 11.49039029 | 11.55769 | 10.46186 | 9.586054 | 9.94279  | 3.247005 |
| NTR.g0741 | chr9:96425753-96427920   | 2168  | 4.488548763 | 3.082247 | 2.739277 | 1.922137 | 5.903514 | 0.958042 |
| NTR.g0742 | chr9:99351838-99352459   | 622   | 2.003961144 | 2.707574 | 1.413221 | 3.926936 | 3.252171 | 0.684365 |
| NTR.g0745 | chr9:121186920-121187916 | 997   | 3.794166433 | 2.197003 | 2.229749 | 0.337954 | 1.319452 | 0        |
| NTR.g0747 | chr9:13217550-13218042   | 493   | 7.37478685  | 11.64642 | 5.778669 | 14.13304 | 13.47085 | 1.717184 |
| NTR.g0748 | chr9:13657819-13673429   | 15611 | 36.21704322 | 26.83839 | 45.98857 | 19.29797 | 32.23661 | 3.31295  |
| NTR.g0751 | chr9:48329524-48331007   | 1484  | 10.62191755 | 16.70532 | 6.70466  | 9.986788 | 6.384445 | 2.183188 |
| NTR.g0753 | chr9:62508694-62513903   | 5210  | 14.51459642 | 1.658811 | 1.122357 | 0.170111 | 3.099384 | 1.467481 |
| NTR.g0754 | chr9:63777549-63784345   | 6797  | 7.114062062 | 2.816671 | 4.931176 | 3.574518 | 4.229013 | 0.934422 |
| NTR.g0755 | chr9:63784574-63785233   | 660   | 2.324013015 | 2.242857 | 2.003132 | 2.208051 | 5.567561 | 0.264555 |
| NTR.g0756 | chr9:95956708-95964706   | 7999  | 12.8551026  | 12.9304  | 11.598   | 10.56332 | 11.22863 | 3.709942 |
| NTR.g0757 | chr9:96392351-96397425   | 5075  | 2.770588065 | 1.671148 | 0.814107 | 1.079672 | 4.616744 | 0.591358 |
| NTR.g0758 | chr9:96406988-96413915   | 6928  | 5.29145112  | 4.425781 | 3.316982 | 3.770566 | 5.724895 | 0        |
| NTR.g0759 | chr9:96418037-96419973   | 1937  | 2.602705632 | 5.274817 | 3.365017 | 3.245599 | 3.318744 | 0.44442  |
| NTR.g0762 | chrX:30546330-30547455   | 1126  | 5.620987308 | 12.99668 | 23.3986  | 21.90446 | 20.49766 | 4.699027 |
| NTR.g0763 | chrX:32017452-32021477   | 4026  | 4.502570925 | 39.62949 | 26.46063 | 13.63582 | 36.53546 | 0.615062 |
| NTR.g0765 | chrX:120211300-120212549 | 1250  | 4.01263195  | 1.742629 | 16.50695 | 5.718618 | 11.04712 | 2.055508 |
| NTR.g0766 | chrX:121395291-121397033 | 1743  | 18.9989788  | 8.556578 | 27.09443 | 4.512745 | 79.87187 | 3.892962 |

|           |                          |       |             |          |          |          |          |          |
|-----------|--------------------------|-------|-------------|----------|----------|----------|----------|----------|
| NTR.g0767 | chrX:121397729-121398840 | 1112  | 3.894012918 | 6.359746 | 4.928919 | 2.401255 | 10.76395 | 0.511473 |
| NTR.g0769 | chrX:146905580-146924885 | 19306 | 4.098892153 | 4.674985 | 24.52627 | 7.567466 | 6.263222 | 1.33617  |
| NTR.g0771 | chrX:7758366-7761949     | 3584  | 0.55254851  | 0.533253 | 1.298883 | 0.984333 | 3.202553 | 0.235873 |
| NTR.g0772 | chrX:30545933-30547189   | 1257  | 0.699743809 | 16.2074  | 15.90067 | 27.63193 | 12.70784 | 0.995695 |
| NTR.g0773 | chrX:32016596-32017807   | 1212  | 8.702639027 | 89.58654 | 55.04016 | 30.63738 | 96.55699 | 1.415241 |
| NTR.g0774 | chrX:32018167-32021477   | 3311  | 16.03233248 | 40.06974 | 43.16336 | 34.41928 | 36.37494 | 5.030579 |
| NTR.g0775 | chrX:67626400-67627798   | 1399  | 2.454692341 | 3.948288 | 3.205709 | 0.242939 | 1.896976 | 0.465718 |
| NTR.g0777 | chrX:95335590-95344328   | 8739  | 3.390094557 | 3.271711 | 1.086701 | 0.823535 | 1.786262 | 0.263122 |
| NTR.g0779 | chrX:113400722-113413393 | 12672 | 805.4506364 | 1389.872 | 507.4038 | 760.7066 | 780.4076 | 171.8425 |
| NTR.g0780 | chrX:121394388-121395728 | 1341  | 12.14595962 | 3.34909  | 18.1507  | 2.318285 | 52.89876 | 2.518381 |
| NTR.g0781 | chrX:122065053-122067537 | 2485  | 28.85704048 | 10.4435  | 11.30577 | 100.6723 | 47.85337 | 4.448375 |
| NTR.g0782 | chrX:132575827-132579592 | 3766  | 5.056685229 | 0.956883 | 0.582687 | 0        | 1.953892 | 0        |
| NTR.g0784 | chrX:146904830-146927004 | 22175 | 3.755096069 | 4.336191 | 27.60399 | 11.09759 | 21.61345 | 1.501062 |

**Table S2. AS events significantly changed after virus infection**

| ASE  | Gene                | Str | Inclusive                | Exclusive                                             | Inclusive                                                                                                                                        | Exclusive                                                    |
|------|---------------------|-----|--------------------------|-------------------------------------------------------|--------------------------------------------------------------------------------------------------------------------------------------------------|--------------------------------------------------------------|
| A3SS | ENSMUSG00000000339  | -   | chr3:116210769-116210863 | chr3:116209911-116210863                              | ENSMUST00000140677,ENSMUST00000000348,<br>ENSMUST00000143425                                                                                     | ENSMUST00000153005                                           |
| A3SS | ENSMUSG00000000827  | +   | chr2:181232037-181234550 | chr2:181232037-181234008/chr2<br>:181232037-181236610 | ENSMUST00000129390,ENSMUST00000108799,<br>ENSMUST00000153909,ENSMUST00000149163,<br>ENSMUST00000108800,ENSMUST00000069712,<br>ENSMUST00000000844 | ENSMUST00000108802/ENSMUST00000125529                        |
| A3SS | ENSMUSG000000005628 | +   | chr3:94928500-94929119   | chr3:94928500-94929437                                | ENSMUST00000131597                                                                                                                               | ENSMUST00000005769                                           |
| A3SS | ENSMUSG000000019179 | +   | chr5:136254671-136259175 | chr5:136254671-136260054                              | ENSMUST00000130795,ENSMUST00000019323                                                                                                            | ENSMUST00000138101                                           |
| A3SS | ENSMUSG000000021789 | +   | chr14:41945121-41945505  | chr14:41945121-41945724                               | ENSMUST00000170719                                                                                                                               | ENSMUST00000022314                                           |
| A3SS | ENSMUSG000000022285 | -   | chr15:36720743-36723900  | chr15:36723430-36723900                               | ENSMUST00000110361                                                                                                                               | ENSMUST00000022894                                           |
| A3SS | ENSMUSG000000022747 | -   | chr16:58507727-58524040  | chr16:58523785-58524040                               | ENSMUST00000123918                                                                                                                               | ENSMUST00000151510                                           |
| A3SS | ENSMUSG000000022747 | -   | chr16:58507727-58524237  | chr16:58523785-58524237/chr16<br>:58524145-58524237   | ENSMUST00000114358                                                                                                                               | ENSMUST00000126978,ENSMUST00000114357/<br>ENSMUST00000123918 |
| A3SS | ENSMUSG000000022747 | -   | chr16:58523785-58524237  | chr16:58507727-58524237/chr16<br>:58524145-58524237   | ENSMUST00000126978,ENSMUST00000114357                                                                                                            | ENSMUST00000114358/ENSMUST00000123918                        |
| A3SS | ENSMUSG000000022890 | -   | chr16:84831752-84835666  | chr16:84835228-84835666                               | ENSMUST00000138279                                                                                                                               | ENSMUST00000023608,ENSMUST00000114191                        |
| A3SS | ENSMUSG000000023944 | -   | chr17:45708568-45708714  | chr17:45706499-45708714                               | ENSMUST00000024739,ENSMUST00000163966                                                                                                            | ENSMUST00000165127                                           |
| A3SS | ENSMUSG000000024121 | -   | chr17:24306231-24306548  | chr17:24301849-24306548                               | ENSMUST00000098862                                                                                                                               | ENSMUST00000150647                                           |
| A3SS | ENSMUSG000000026879 | +   | chr2:35111993-35122340   | chr2:35111993-35139425                                | ENSMUST00000113016                                                                                                                               | ENSMUST00000167857                                           |
| A3SS | ENSMUSG000000027523 | +   | chr2:174153442-174153609 | chr2:174153442-174159713                              | ENSMUST00000087871,ENSMUST00000149016,<br>ENSMUST00000133356,ENSMUST00000156623                                                                  | ENSMUST00000124935                                           |
| A3SS | ENSMUSG000000030201 | -   | chr6:134492063-134516661 | chr6:134470611-134516661                              | ENSMUST00000032322                                                                                                                               | ENSMUST00000126836                                           |
| A3SS | ENSMUSG000000030538 | -   | chr7:87377264-87377396   | chr7:87375310-87377396/chr7:8                         | ENSMUST00000065163                                                                                                                               | ENSMUST00000131402/ENSMUST00000071457                        |

|      |                    |   |                           |                                               |                                                                                                                                                                                                               |                                                                                                        |
|------|--------------------|---|---------------------------|-----------------------------------------------|---------------------------------------------------------------------------------------------------------------------------------------------------------------------------------------------------------------|--------------------------------------------------------------------------------------------------------|
|      |                    |   |                           | 7373434-87377396                              |                                                                                                                                                                                                               |                                                                                                        |
| A3SS | ENSMUSG00000032366 | - | chr9:66895718-66896826    | chr9:66896056-66896826                        | ENSMUST00000131279,ENSMUST00000113685,<br>ENSMUST00000129733,ENSMUST00000050905,<br>ENSMUST00000030185,ENSMUST00000113693,<br>ENSMUST00000113687,ENSMUST00000129466,<br>ENSMUST00000113697,ENSMUST00000113707 | ENSMUST00000113701,ENSMUST00000113705,E<br>NSMUST00000034928                                           |
| A3SS | ENSMUSG00000033685 | + | chr7:107646958-107647078  | chr7:107646958-107647245                      | ENSMUST00000149808                                                                                                                                                                                            | ENSMUST00000126534                                                                                     |
| A3SS | ENSMUSG00000038145 | + | chr9:122026525-122041011  | chr9:122026525-122046024                      | ENSMUST00000119215,ENSMUST00000118886,<br>ENSMUST00000134949,ENSMUST00000146832                                                                                                                               | ENSMUST00000120173                                                                                     |
| A3SS | ENSMUSG00000039771 | + | chr5:136592675-136595865  | chr5:136592675-136597959                      | ENSMUST00000041366,ENSMUST00000111127                                                                                                                                                                         | ENSMUST00000111129                                                                                     |
| A3SS | ENSMUSG00000040264 | + | chr3:142163710-142166785  | chr3:142163710-142164226                      | ENSMUST00000065526                                                                                                                                                                                            | ENSMUST00000045254,ENSMUST00000090127,E<br>NSMUST00000165451                                           |
| A3SS | ENSMUSG00000045932 | + | chr19:34625512-34637353   | chr19:34625512-34644709                       | ENSMUST00000149829                                                                                                                                                                                            | ENSMUST00000102826                                                                                     |
| A3SS | ENSMUSG00000060126 | + | chr14:76245263-76245424   | chr14:76245263-76246010                       | ENSMUST00000150047,ENSMUST00000154533,<br>ENSMUST00000110894                                                                                                                                                  | ENSMUST00000142061                                                                                     |
| A3SS | ENSMUSG00000062825 | - | chr11:120208663-120209283 | chr11:120209189-120209283                     | ENSMUST00000089616                                                                                                                                                                                            | ENSMUST00000071555,ENSMUST00000062147,E<br>NSMUST00000131103,ENSMUST00000141406,E<br>NSMUST00000128055 |
| A3SS | ENSMUSG00000068039 | + | chr17:13109495-13110664   | chr17:13109495-13110909                       | ENSMUST00000129632,ENSMUST00000151715,<br>ENSMUST00000151287,ENSMUST00000143961,<br>ENSMUST00000133003                                                                                                        | ENSMUST00000089024                                                                                     |
| A5SS | ENSMUSG00000005871 | + | chr18:34425876-34427952   | chr18:34420811-34427952                       | ENSMUST00000163295                                                                                                                                                                                            | ENSMUST00000066133,ENSMUST00000079362,E<br>NSMUST00000115781,ENSMUST00000170023                        |
| A5SS | ENSMUSG00000006333 | + | chr7:3656370-3658253      | chr7:3657783-3658253/chr7:365<br>7521-3658253 | ENSMUST00000108624                                                                                                                                                                                            | ENSMUST00000146927/ENSMUST00000006496,<br>ENSMUST00000108625                                           |
| A5SS | ENSMUSG00000022884 | + | chr16:23111969-23113240   | chr16:23112530-23113240                       | ENSMUST00000147117,ENSMUST00000023599,                                                                                                                                                                        | ENSMUST00000123413                                                                                     |

|      |                    |   |                          |                                                                              |                                                                                                                            |                                                                                                        |
|------|--------------------|---|--------------------------|------------------------------------------------------------------------------|----------------------------------------------------------------------------------------------------------------------------|--------------------------------------------------------------------------------------------------------|
|      |                    |   |                          |                                                                              | ENSMUST00000168891,ENSMUST00000131871,<br>ENSMUST00000115341                                                               |                                                                                                        |
| A5SS | ENSMUSG00000023092 | + | chrX:54043827-54045021   | chrX:54043223-54045021/chrX:5<br>4044615-54045021                            | ENSMUST00000116596,ENSMUST00000114773,<br>ENSMUST00000023854,ENSMUST00000114772                                            | ENSMUST00000114770,ENSMUST00000114768/<br>ENSMUST00000114769                                           |
| A5SS | ENSMUSG00000023092 | + | chrX:54043223-54045021   | chrX:54043827-54045021/chrX:5<br>4044615-54045021                            | ENSMUST00000114770,ENSMUST00000114768                                                                                      | ENSMUST00000116596,ENSMUST00000114773,E<br>NSMUST00000023854,ENSMUST00000114772/E<br>NSMUST00000114769 |
| A5SS | ENSMUSG00000027639 | - | chr2:156925239-156927057 | chr2:156925239-156927457                                                     | ENSMUST00000139263                                                                                                         | ENSMUST00000057725,ENSMUST00000109550                                                                  |
| A5SS | ENSMUSG00000027940 | + | chr3:89895013-89902297   | chr3:89894001-89902297                                                       | ENSMUST00000136125                                                                                                         | ENSMUST00000119158                                                                                     |
| A5SS | ENSMUSG00000028788 | + | chr4:129522436-129523709 | chr4:129520006-129523709                                                     | ENSMUST00000165853,ENSMUST00000030578                                                                                      | ENSMUST00000141754                                                                                     |
| A5SS | ENSMUSG00000032366 | - | chr9:66875974-66877471   | chr9:66875974-66878836                                                       | ENSMUST00000113685,ENSMUST00000050905,<br>ENSMUST00000113684                                                               | ENSMUST00000113686,ENSMUST00000113687                                                                  |
| A5SS | ENSMUSG00000040264 | + | chr3:142171060-142184004 | chr3:142182023-142184004                                                     | ENSMUST00000090127                                                                                                         | ENSMUST00000065526,ENSMUST00000165451                                                                  |
| A5E  | ENSMUSG00000001348 | - | chr9:21934573-21936181   | chr9:21934573-21934967/chr9:2<br>1934573-21940057                            | ENSMUST00000069330                                                                                                         | ENSMUST00000115315/ENSMUST00000165735                                                                  |
| A5E  | ENSMUSG00000001348 | - | chr9:21934573-21934967   | chr9:21934573-21936181/chr9:2<br>1934573-21940057                            | ENSMUST00000115315                                                                                                         | ENSMUST00000069330/ENSMUST00000165735                                                                  |
| A5E  | ENSMUSG00000001891 | - | chr11:21254409-21270190  | chr11:21254409-21271018                                                      | ENSMUST00000102875                                                                                                         | ENSMUST00000060895                                                                                     |
| A5E  | ENSMUSG00000001911 | - | chr8:87296214-87297253   | chr8:87296214-87323897                                                       | ENSMUST00000109764,ENSMUST00000109762,<br>ENSMUST00000063596                                                               | ENSMUST00000076715,ENSMUST00000126806,E<br>NSMUST00000099070                                           |
| A5E  | ENSMUSG00000002504 | - | chr17:24779315-24781764  | chr17:24779315-24784472                                                      | ENSMUST00000019684                                                                                                         | ENSMUST00000088403,ENSMUST0000002572                                                                   |
| A5E  | ENSMUSG00000002963 | + | chr7:52113579-52113823   | chr7:52112924-52113823                                                       | ENSMUST0000003044,ENSMUST00000107876,<br>ENSMUST00000123015,ENSMUST00000098478                                             | ENSMUST00000124168,ENSMUST00000139003                                                                  |
| A5E  | ENSMUSG00000002983 | - | chr7:20213319-20214540   | chr7:20213319-20213425/chr7:2<br>0213319-20213526/chr7:2021331<br>9-20213957 | ENSMUST00000137615,ENSMUST00000108452,<br>ENSMUST00000094762,ENSMUST00000131759,<br>ENSMUST00000049912,ENSMUST00000098754, | ENSMUST00000153309/ENSMUST00000141586/<br>ENSMUST00000130543                                           |



|     |                    |   |                          |                                                                      |                                                                                                                   |                                                           |
|-----|--------------------|---|--------------------------|----------------------------------------------------------------------|-------------------------------------------------------------------------------------------------------------------|-----------------------------------------------------------|
|     |                    |   |                          |                                                                      | ENSMUST00000148040                                                                                                |                                                           |
| AFE | ENSMUSG00000002992 | - | chr7:20258962-20262071   | chr7:20258962-20259184/chr7:20258962-20266654                        | ENSMUST00000142352,ENSMUST00000127648,ENSMUST00000003074                                                          | ENSMUST00000134116/ENSMUST00000150569                     |
| AFE | ENSMUSG00000003099 | - | chr7:17600894-17613042   | chr7:17600894-17607764                                               | ENSMUST00000138353,ENSMUST00000156366                                                                             | ENSMUST00000003183,ENSMUST00000142597,ENSMUST00000127311  |
| AFE | ENSMUSG00000003123 | - | chr7:26173672-26175081   | chr7:26173672-26180520/chr7:26173672-26182617                        | ENSMUST00000054301                                                                                                | ENSMUST00000003207/ENSMUST00000149349                     |
| AFE | ENSMUSG00000003352 | + | chr15:98465644-98469919  | chr15:98462951-98469919                                              | ENSMUST00000003442                                                                                                | ENSMUST00000109150                                        |
| AFE | ENSMUSG00000003500 | - | chr6:29159268-29162069   | chr6:29159268-29166072                                               | ENSMUST00000160878,ENSMUST00000078155,ENSMUST00000162215,ENSMUST00000159124,ENSMUST00000162099,ENSMUST00000160749 | ENSMUST00000162739                                        |
| AFE | ENSMUSG00000003644 | - | chr4:133427918-133430523 | chr4:133427918-133428759/chr4:133427918-133436832                    | ENSMUST00000157067,ENSMUST00000168974                                                                             | ENSMUST00000137486/ENSMUST00000105894,ENSMUST000000003741 |
| AFE | ENSMUSG00000004085 | + | chr2:72123912-72136245   | chr2:72136095-72136245                                               | ENSMUST00000090824,ENSMUST00000150126,ENSMUST00000112073,ENSMUST00000135469,ENSMUST00000135204                    | ENSMUST00000144111                                        |
| AFE | ENSMUSG00000004263 | - | chr6:124699939-124706002 | chr6:124699939-124703635/chr6:124699939-124706314                    | ENSMUST00000146872                                                                                                | ENSMUST00000129411/ENSMUST00000088357                     |
| AFE | ENSMUSG00000004771 | - | chr9:64574624-64585391   | chr9:64574624-64576041                                               | ENSMUST00000171100                                                                                                | ENSMUST00000172298,ENSMUST00000004892,ENSMUST00000169058  |
| AFE | ENSMUSG00000004897 | + | chr3:87711087-87717013   | chr3:87713985-87717013/chr3:87711489-87717013/chr3:87710636-87717013 | ENSMUST00000162631,ENSMUST00000159492                                                                             | ENSMUST00000160198/ENSMUST00000161616/ENSMUST00000005017  |
| AFE | ENSMUSG00000005514 | + | chr5:136165122-136191742 | chr5:136150531-136191742/chr5:136145986-136191742                    | ENSMUST00000005651,ENSMUST00000122113                                                                             | ENSMUST00000153515/ENSMUST00000153500                     |
| AFE | ENSMUSG00000006390 | + | chr4:118100820-118103101 | chr4:118102435-118103101                                             | ENSMUST00000006557,ENSMUST00000129419,                                                                            | ENSMUST00000067896                                        |

|     |                    |   |                          |                                                                                                                      |                                                          |                                                                                                                                      |
|-----|--------------------|---|--------------------------|----------------------------------------------------------------------------------------------------------------------|----------------------------------------------------------|--------------------------------------------------------------------------------------------------------------------------------------|
|     |                    |   |                          |                                                                                                                      | ENSMUST00000102673,ENSMUST00000167636                    |                                                                                                                                      |
| AFE | ENSMUSG00000007880 | - | chr4:133278966-133308384 | chr4:133278966-133309829/chr4:133278966-133312310                                                                    | ENSMUST00000145664,ENSMUST00000105896,ENSMUST00000105897 | ENSMUST00000138473/ENSMUST00000008024                                                                                                |
| AFE | ENSMUSG00000007880 | - | chr4:133278966-133309829 | chr4:133278966-133308384/chr4:133278966-133312310                                                                    | ENSMUST00000138473                                       | ENSMUST00000145664,ENSMUST00000105896,ENSMUST00000105897/ENSMUST00000008024                                                          |
| AFE | ENSMUSG00000010067 | + | chr9:107457256-107459784 | chr9:107456575-107459784/chr9:107454177-107459784/chr9:107459082-107459784                                           | ENSMUST00000010211                                       | ENSMUST00000093786,ENSMUST00000122225/ENSMUST00000156198/ENSMUST00000121635                                                          |
| AFE | ENSMUSG00000010067 | + | chr9:107454177-107459784 | chr9:107457256-107459784/chr9:107456575-107459784/chr9:107459082-107459784                                           | ENSMUST00000156198                                       | ENSMUST00000010211/ENSMUST00000093786,ENSMUST00000122225/ENSMUST00000121635                                                          |
| AFE | ENSMUSG00000010080 | - | chr11:94357995-94359456  | chr11:94357995-94361007                                                                                              | ENSMUST00000142992                                       | ENSMUST00000127305,ENSMUST00000165069,ENSMUST00000010224                                                                             |
| AFE | ENSMUSG00000012405 | - | chr14:19102974-19103473  | chr14:19102974-19103337/chr14:19102974-19103359/chr14:19102974-19103733                                              | ENSMUST00000080281                                       | ENSMUST00000079419/ENSMUST00000100799/ENSMUST00000147121                                                                             |
| AFE | ENSMUSG00000014606 | - | chr11:70459730-70460793  | chr11:70459730-70460270                                                                                              | ENSMUST00000139638                                       | ENSMUST00000014750                                                                                                                   |
| AFE | ENSMUSG00000015053 | + | chr6:88143994-88149511   | chr6:88148875-88149511                                                                                               | ENSMUST00000170089                                       | ENSMUST00000015197                                                                                                                   |
| AFE | ENSMUSG00000015656 | + | chr9:40609703-40610001   | chr9:40609431-40610001                                                                                               | ENSMUST00000133964                                       | ENSMUST00000140984,ENSMUST00000117870,ENSMUST00000015800,ENSMUST00000117557                                                          |
| AFE | ENSMUSG00000015668 | - | chrX:97820726-97821155   | chrX:97820726-97821225                                                                                               | ENSMUST00000059099,ENSMUST00000151548                    | ENSMUST00000015812                                                                                                                   |
| AFE | ENSMUSG00000017756 | + | chr13:73901338-73921967  | chr13:73870785-73921967                                                                                              | ENSMUST00000017900,ENSMUST00000171201                    | ENSMUST00000068263                                                                                                                   |
| AFE | ENSMUSG00000018819 | + | chr7:149646871-149670384 | chr7:149669352-149670384/chr7:149669196-149670384/chr7:149658269-149670384/chr7:149663271-149670384/chr7:149661322-1 | ENSMUST00000105967,ENSMUST00000018963,ENSMUST00000105968 | ENSMUST00000156960/ENSMUST00000140626/ENSMUST00000038946,ENSMUST00000128986,ENSMUST00000105966/ENSMUST00000149521/ENSMUST00000132956 |

|     |                    |   |                           |                                                                                                 |                                       |                                                                                                                                      |
|-----|--------------------|---|---------------------------|-------------------------------------------------------------------------------------------------|---------------------------------------|--------------------------------------------------------------------------------------------------------------------------------------|
|     |                    |   |                           | 49670384                                                                                        |                                       |                                                                                                                                      |
| AFE | ENSMUSG00000018983 | + | chr4:135736840-135737201  | chr4:135736492-135737201                                                                        | ENSMUST00000168263,ENSMUST00000149750 | ENSMUST00000061721                                                                                                                   |
| AFE | ENSMUSG00000019254 | - | chr7:4448937-4452868      | chr7:4448937-4449018                                                                            | ENSMUST00000125220                    | ENSMUST00000124248,ENSMUST00000013886,ENSMUST00000145689                                                                             |
| AFE | ENSMUSG00000019920 | + | chr10:57857348-57861769   | chr10:57834447-57861769/chr10:57814945-57861769/chr10:57786435-57861769                         | ENSMUST00000105468,ENSMUST00000020077 | ENSMUST00000171062/ENSMUST00000171162/ENSMUST00000020078                                                                             |
| AFE | ENSMUSG00000019920 | + | chr10:57814945-57861769   | chr10:57834447-57861769/chr10:57857348-57861769/chr10:57786435-57861769                         | ENSMUST00000171162                    | ENSMUST00000171062/ENSMUST00000105468,ENSMUST00000020077/ENSMUST00000020078                                                          |
| AFE | ENSMUSG00000019929 | + | chr10:96942423-96945973   | chr10:96945181-96945973                                                                         | ENSMUST00000105287                    | ENSMUST00000163448                                                                                                                   |
| AFE | ENSMUSG00000019947 | - | chr10:67597854-67599234   | chr10:67597854-67648774                                                                         | ENSMUST00000165054                    | ENSMUST00000020106                                                                                                                   |
| AFE | ENSMUSG00000019970 | + | chr10:21712213-21714772   | chr10:21714631-21714772/chr10:21698788-21714772/chr10:21689330-21714772/chr10:21713987-21714772 | ENSMUST00000150089,ENSMUST00000100036 | ENSMUST00000020145,ENSMUST00000141218,ENSMUST00000126560/ENSMUST00000142174,ENSMUST00000164659/ENSMUST00000120509/ENSMUST00000092673 |
| AFE | ENSMUSG00000020023 | + | chr10:94039197-94041168   | chr10:94013721-94041168/chr10:94038172-94041168/chr10:93977849-94041168                         | ENSMUST00000117929                    | ENSMUST00000117460/ENSMUST00000121471/ENSMUST00000065060                                                                             |
| AFE | ENSMUSG00000020120 | - | chr11:16895358-16908560   | chr11:16895358-16952186/chr11:16895358-16902817                                                 | ENSMUST00000102881                    | ENSMUST00000020321/ENSMUST00000156101                                                                                                |
| AFE | ENSMUSG00000020120 | - | chr11:16895358-16952186   | chr11:16895358-16908560/chr11:16895358-16902817                                                 | ENSMUST00000020321                    | ENSMUST00000102881/ENSMUST00000156101                                                                                                |
| AFE | ENSMUSG00000020225 | + | chr10:119638905-119652597 | chr10:119645998-119652597                                                                       | ENSMUST00000156877                    | ENSMUST00000020446,ENSMUST00000141206,ENSMUST00000134797                                                                             |
| AFE | ENSMUSG00000020265 | + | chr10:77069713-77072557   | chr10:77069095-77072557/chr10                                                                   | ENSMUST00000099538                    | ENSMUST00000129492/ENSMUST00000020501,                                                                                               |

|     |                    |   |                           |                                                                                                             |                                                                                                                           |                                                                                                                                                  |
|-----|--------------------|---|---------------------------|-------------------------------------------------------------------------------------------------------------|---------------------------------------------------------------------------------------------------------------------------|--------------------------------------------------------------------------------------------------------------------------------------------------|
|     |                    |   |                           | :77069086-77072557                                                                                          |                                                                                                                           | ENSMUST00000141228,ENSMUST00000137841                                                                                                            |
| AFE | ENSMUSG00000020315 | - | chr11:30059445-30097724   | chr11:30059445-30119579                                                                                     | ENSMUST00000102838,ENSMUST00000039018                                                                                     | ENSMUST00000011877,ENSMUST00000006629,E<br>NSMUST00000124231                                                                                     |
| AFE | ENSMUSG00000020400 | - | chr11:54754384-54769523   | chr11:54754384-54769350/chr11<br>:54754384-54776335                                                         | ENSMUST00000102731,ENSMUST00000124304,<br>ENSMUST00000108889,ENSMUST00000101203                                           | ENSMUST00000155316/ENSMUST00000018482                                                                                                            |
| AFE | ENSMUSG00000020453 | + | chr11:3191887-3193283     | chr11:3193018-3193283/chr11:3<br>189350-3193283/chr11:3192376-<br>3193283                                   | ENSMUST00000020731,ENSMUST00000123983,<br>ENSMUST00000057089,ENSMUST00000094471,<br>ENSMUST00000110043,ENSMUST00000093402 | ENSMUST00000136285/ENSMUST00000101644,<br>ENSMUST00000134089,ENSMUST00000144396/<br>ENSMUST00000153603                                           |
| AFE | ENSMUSG00000020538 | - | chr11:60020759-60033955   | chr11:60020759-60023838                                                                                     | ENSMUST00000020846                                                                                                        | ENSMUST00000144942,ENSMUST00000064158                                                                                                            |
| AFE | ENSMUSG00000020681 | + | chr11:105836717-105836850 | chr11:105836192-105836850                                                                                   | ENSMUST00000001964                                                                                                        | ENSMUST00000132280,ENSMUST00000001963                                                                                                            |
| AFE | ENSMUSG00000021000 | + | chr12:60232591-60237051   | chr12:60230883-60237051                                                                                     | ENSMUST00000170992                                                                                                        | ENSMUST00000069430,ENSMUST00000043421                                                                                                            |
| AFE | ENSMUSG00000021266 | - | chr12:110126758-110131370 | chr12:110126758-110132279                                                                                   | ENSMUST00000161410,ENSMUST00000161154                                                                                     | ENSMUST00000109848,ENSMUST00000160477                                                                                                            |
| AFE | ENSMUSG00000021360 | + | chr13:41014170-41048945   | chr13:40983654-41048945/chr13<br>:40956642-41048945                                                         | ENSMUST00000067778                                                                                                        | ENSMUST00000069958/ENSMUST00000110191                                                                                                            |
| AFE | ENSMUSG00000021360 | + | chr13:40983654-41048945   | chr13:41014170-41048945/chr13<br>:40956642-41048945                                                         | ENSMUST00000069958                                                                                                        | ENSMUST00000067778/ENSMUST00000110191                                                                                                            |
| AFE | ENSMUSG00000021789 | + | chr14:41945537-41945724   | chr14:41945121-41945724                                                                                     | ENSMUST00000170719                                                                                                        | ENSMUST00000022314                                                                                                                               |
| AFE | ENSMUSG00000022010 | + | chr14:76904648-76905056   | chr14:76888482-76905056/chr14<br>:76887731-76905056/chr14:7681<br>8816-76905056/chr14:76904100-<br>76905056 | ENSMUST00000022587                                                                                                        | ENSMUST00000101618/ENSMUST00000142683/<br>ENSMUST00000110888,ENSMUST00000110887,E<br>NSMUST00000048371,ENSMUST00000088906/E<br>NSMUST00000140251 |
| AFE | ENSMUSG00000022010 | + | chr14:76818816-76905056   | chr14:76888482-76905056/chr14<br>:76887731-76905056/chr14:7690<br>4648-76905056/chr14:76904100-<br>76905056 | ENSMUST00000110888,ENSMUST00000110887,<br>ENSMUST00000048371,ENSMUST00000088906                                           | ENSMUST00000101618/ENSMUST00000142683/<br>ENSMUST00000022587/ENSMUST00000140251                                                                  |
| AFE | ENSMUSG00000022037 | + | chr14:66588736-66590569   | chr14:66589541-66590569/chr14                                                                               | ENSMUST00000153460                                                                                                        | ENSMUST00000127387/ENSMUST00000144619/                                                                                                           |

|     |                    |   |                         |                                                                                                                         |                                                              |                                                                                                                            |
|-----|--------------------|---|-------------------------|-------------------------------------------------------------------------------------------------------------------------|--------------------------------------------------------------|----------------------------------------------------------------------------------------------------------------------------|
|     |                    |   |                         | :66590381-66590569/chr14:66587525-66590569/chr14:66590012-66590569/chr14:66589781-66590569                              |                                                              | ENSMUST00000022616/ENSMUST00000128539/<br>ENSMUST00000138191                                                               |
| AFE | ENSMUSG00000022037 | + | chr14:66587525-66590569 | chr14:66589541-66590569/chr14:66588736-66590569/chr14:66590381-66590569/chr14:66590012-66590569/chr14:66589781-66590569 | ENSMUST00000022616                                           | ENSMUST00000127387/ENSMUST00000153460/<br>ENSMUST00000144619/ENSMUST00000128539/<br>ENSMUST00000138191                     |
| AFE | ENSMUSG00000022148 | + | chr15:6604849-6608532   | chr15:6602544-6608532                                                                                                   | ENSMUST00000162154                                           | ENSMUST00000110659,ENSMUST00000090461,ENSMUST00000163073                                                                   |
| AFE | ENSMUSG00000022194 | + | chr14:55503650-55513685 | chr14:55513506-55513685/chr14:55511575-55513685/chr14:55513331-55513685                                                 | ENSMUST00000134077                                           | ENSMUST00000141446/ENSMUST00000140691/<br>ENSMUST00000022808,ENSMUST00000150975,ENSMUST00000116476                         |
| AFE | ENSMUSG00000022389 | + | chr15:81633316-81645374 | chr15:81642150-81645374/chr15:81641576-81645374                                                                         | ENSMUST00000052561,ENSMUST00000109553                        | ENSMUST00000023024/ENSMUST00000168200                                                                                      |
| AFE | ENSMUSG00000022389 | + | chr15:81642150-81645374 | chr15:81633316-81645374/chr15:81641576-81645374                                                                         | ENSMUST00000023024                                           | ENSMUST00000052561,ENSMUST00000109553/<br>ENSMUST00000168200                                                               |
| AFE | ENSMUSG00000022433 | - | chr15:79269285-79272191 | chr15:79269285-79272358                                                                                                 | ENSMUST00000135519                                           | ENSMUST00000117786                                                                                                         |
| AFE | ENSMUSG00000022433 | - | chr15:79269289-79271651 | chr15:79269289-79272358/chr15:79269289-79273977                                                                         | ENSMUST00000122044                                           | ENSMUST00000120859/ENSMUST00000156043                                                                                      |
| AFE | ENSMUSG00000022433 | - | chr15:79269289-79272358 | chr15:79269289-79271651/chr15:79269289-79273977                                                                         | ENSMUST00000120859                                           | ENSMUST00000122044/ENSMUST00000156043                                                                                      |
| AFE | ENSMUSG00000022565 | - | chr15:76025242-76036028 | chr15:76025242-76038492/chr15:76025242-76038854/chr15:76025242-76039395/chr15:76025242-                                 | ENSMUST00000171634,ENSMUST00000073418,<br>ENSMUST00000076442 | ENSMUST00000169289,ENSMUST00000080857/<br>ENSMUST00000171562,ENSMUST00000076355/<br>ENSMUST00000071869,ENSMUST00000170915/ |

|     |                    |   |                         |                                                                                                                                                                                                 |                                                                             |                                                                                                                                                                                                                                     |
|-----|--------------------|---|-------------------------|-------------------------------------------------------------------------------------------------------------------------------------------------------------------------------------------------|-----------------------------------------------------------------------------|-------------------------------------------------------------------------------------------------------------------------------------------------------------------------------------------------------------------------------------|
|     |                    |   |                         | 76028410/chr15:76025242-76059788/chr15:76025242-76061604/chr15:76025242-76029724/chr15:76025242-76029979/chr15:76025242-76030899/chr15:76025242-76025854                                        |                                                                             | ENSMUST00000072692/ENSMUST00000074834/ENSMUST00000089610,ENSMUST00000167754,ENSMUST00000166428/ENSMUST00000169438/ENSMUST00000054449,ENSMUST00000165453,ENSMUST00000169714/ENSMUST00000170728,ENSMUST00000169108/ENSMUST00000023226 |
| AFE | ENSMUSG00000022756 | - | chr16:17576058-17576174 | chr16:17576058-17576733/chr16:17576058-17577019                                                                                                                                                 | ENSMUST00000090165                                                          | ENSMUST00000172164/ENSMUST00000063544                                                                                                                                                                                               |
| AFE | ENSMUSG00000022951 | - | chr16:92397681-92400141 | chr16:92397681-92466078                                                                                                                                                                         | ENSMUST00000023672                                                          | ENSMUST00000060005                                                                                                                                                                                                                  |
| AFE | ENSMUSG00000023036 | + | chr18:37981788-37984675 | chr18:37836561-37984675/chr18:37968631-37984675/chr18:37928194-37984675/chr18:37918021-37984675/chr18:37977637-37984675/chr18:37904312-37984675/chr18:37899197-37984675/chr18:37887970-37984675 | ENSMUST00000055935                                                          | ENSMUST00000073447/ENSMUST00000076807/ENSMUST00000044851/ENSMUST00000061279/ENSMUST00000066140/ENSMUST00000003599/ENSMUST00000091935/ENSMUST00000066149                                                                             |
| AFE | ENSMUSG00000023092 | + | chrX:54007568-54041166  | chrX:54039759-54041166/chrX:54041013-54041166/chrX:54033085-54041166/chrX:54032971-54041166/chrX:54032700-54041166                                                                              | ENSMUST00000116596,ENSMUST00000023854,ENSMUST00000114770,ENSMUST00000114769 | ENSMUST00000144600/ENSMUST00000151033/ENSMUST00000155882/ENSMUST00000114772,ENSMUST00000114768/ENSMUST00000114773                                                                                                                   |
| AFE | ENSMUSG00000023092 | + | chrX:54032971-54041166  | chrX:54039759-54041166/chrX:54041013-54041166/chrX:54007568-54041166/chrX:54033085-54041166/chrX:54032700-54041166                                                                              | ENSMUST00000114772,ENSMUST00000114768                                       | ENSMUST00000144600/ENSMUST00000151033/ENSMUST00000116596,ENSMUST00000023854,ENSMUST00000114770,ENSMUST00000114769/ENSMUST00000155882/ENSMUST00000114773                                                                             |

|     |                    |   |                         |                                                                                 |                                                                                                                            |                                                                                                                                                                                                                                      |
|-----|--------------------|---|-------------------------|---------------------------------------------------------------------------------|----------------------------------------------------------------------------------------------------------------------------|--------------------------------------------------------------------------------------------------------------------------------------------------------------------------------------------------------------------------------------|
| AFE | ENSMUSG00000023206 | + | chr2:11627571-11639891  | chr2:11627205-11639891                                                          | ENSMUST00000114833,ENSMUST00000114832,<br>ENSMUST00000114831,ENSMUST00000114834,<br>ENSMUST00000078834,ENSMUST00000138856  | ENSMUST00000126394,ENSMUST00000148748,E<br>NSMUST00000128156,ENSMUST00000123600,E<br>NSMUST00000091456,ENSMUST00000135341,E<br>NSMUST00000138349                                                                                     |
| AFE | ENSMUSG00000024048 | - | chr17:71346235-71351448 | chr17:71346235-71349329/chr17<br>:71346235-71352012/chr17:7134<br>6235-71347225 | ENSMUST00000148960                                                                                                         | ENSMUST00000150456/ENSMUST00000123686/<br>ENSMUST00000024846                                                                                                                                                                         |
| AFE | ENSMUSG00000024050 | - | chr17:32524762-32525763 | chr17:32524762-32526205/chr17<br>:32524762-32525384/chr17:3252<br>4762-32525549 | ENSMUST00000170603                                                                                                         | ENSMUST00000003725,ENSMUST00000087699,E<br>NSMUST00000163107,ENSMUST00000114463,E<br>NSMUST00000114462/ENSMUST00000165912/E<br>NSMUST00000087703,ENSMUST00000170617,E<br>NSMUST00000172216,ENSMUST00000169280,E<br>NSMUST00000171728 |
| AFE | ENSMUSG00000024050 | - | chr17:32524762-32526205 | chr17:32524762-32525763/chr17<br>:32524762-32525384/chr17:3252<br>4762-32525549 | ENSMUST00000003725,ENSMUST00000087699,<br>ENSMUST00000163107,ENSMUST00000114463,<br>ENSMUST00000114462                     | ENSMUST00000170603/ENSMUST00000165912/<br>ENSMUST00000087703,ENSMUST00000170617,E<br>NSMUST00000172216,ENSMUST00000169280,E<br>NSMUST00000171728                                                                                     |
| AFE | ENSMUSG00000024969 | - | chr19:7365272-7369528   | chr19:7365272-7415658/chr19:7<br>365272-7416257                                 | ENSMUST00000025921                                                                                                         | ENSMUST00000032556,ENSMUST00000165989,E<br>NSMUST00000032557,ENSMUST00000051711,E<br>NSMUST00000164205,ENSMUST00000169541,E<br>NSMUST00000165286,ENSMUST00000171721,E<br>NSMUST00000168872,ENSMUST00000165965/E<br>NSMUST00000171393 |
| AFE | ENSMUSG00000024969 | - | chr19:7365272-7415658   | chr19:7365272-7369528/chr19:7<br>365272-7416257                                 | ENSMUST00000032556,ENSMUST00000165989,<br>ENSMUST00000032557,ENSMUST00000051711,<br>ENSMUST00000164205,ENSMUST00000169541, | ENSMUST00000025921/ENSMUST00000171393                                                                                                                                                                                                |

|     |                    |   |                           |                                                                                                                  |                                                                                                                                                                                                               |                                                                                 |
|-----|--------------------|---|---------------------------|------------------------------------------------------------------------------------------------------------------|---------------------------------------------------------------------------------------------------------------------------------------------------------------------------------------------------------------|---------------------------------------------------------------------------------|
|     |                    |   |                           |                                                                                                                  | ENSMUST00000165286,ENSMUST00000171721,<br>ENSMUST00000168872,ENSMUST00000165965                                                                                                                               |                                                                                 |
| AFE | ENSMUSG00000025025 | + | chr19:53404210-53405841   | chr19:53385463-53405841/chr19:<br>:53405090-53405841                                                             | ENSMUST00000025998                                                                                                                                                                                            | ENSMUST00000003870/ENSMUST00000111737                                           |
| AFE | ENSMUSG00000025025 | + | chr19:53385463-53405841   | chr19:53404210-53405841/chr19:<br>:53405090-53405841                                                             | ENSMUST00000003870                                                                                                                                                                                            | ENSMUST00000025998/ENSMUST00000111737                                           |
| AFE | ENSMUSG00000025132 | - | chr11:120441707-120442836 | chr11:120441707-120442304                                                                                        | ENSMUST00000106197                                                                                                                                                                                            | ENSMUST00000067936                                                              |
| AFE | ENSMUSG00000025223 | - | chr19:46110855-46113545   | chr19:46110855-46119320                                                                                          | ENSMUST00000137771,ENSMUST00000056931                                                                                                                                                                         | ENSMUST00000026252,ENSMUST00000156585,E<br>NSMUST00000152946                    |
| AFE | ENSMUSG00000025353 | - | chr10:128257161-128258598 | chr10:128257161-128257317                                                                                        | ENSMUST00000116228                                                                                                                                                                                            | ENSMUST00000026409                                                              |
| AFE | ENSMUSG00000025408 | + | chr10:126730815-126732377 | chr10:126727947-126732377                                                                                        | ENSMUST00000026475                                                                                                                                                                                            | ENSMUST00000139091                                                              |
| AFE | ENSMUSG00000025647 | + | chr9:108953967-108958492  | chr9:108955494-108958492/chr9:<br>:108957777-108958492/chr9:108<br>957593-108958492/chr9:1089575<br>21-108958492 | ENSMUST00000135942,ENSMUST00000128976,<br>ENSMUST00000143754,ENSMUST00000112059,<br>ENSMUST00000026737,ENSMUST00000154113,<br>ENSMUST00000059097,ENSMUST00000120305,<br>ENSMUST00000120218,ENSMUST00000155541 | ENSMUST00000124432/ENSMUST00000151141/<br>ENSMUST00000152771/ENSMUST00000154184 |
| AFE | ENSMUSG00000026031 | + | chr1:58770503-58783150    | chr1:58768436-58783150                                                                                           | ENSMUST00000097722,ENSMUST00000164900,<br>ENSMUST00000069333,ENSMUST00000114309,<br>ENSMUST00000140940                                                                                                        | ENSMUST00000114313                                                              |
| AFE | ENSMUSG00000026430 | - | chr1:133078831-133096430  | chr1:133078831-133108834                                                                                         | ENSMUST00000068564                                                                                                                                                                                            | ENSMUST00000027688,ENSMUST00000112442                                           |
| AFE | ENSMUSG00000026817 | + | chr2:32484008-32485369    | chr2:32485136-32485369                                                                                           | ENSMUST00000156578,ENSMUST00000113278,<br>ENSMUST00000113277                                                                                                                                                  | ENSMUST00000068271                                                              |
| AFE | ENSMUSG00000026833 | + | chr2:28048982-28063598    | chr2:28061619-28063598                                                                                           | ENSMUST00000100244,ENSMUST00000113920,<br>ENSMUST00000152415                                                                                                                                                  | ENSMUST00000102879,ENSMUST00000028177                                           |
| AFE | ENSMUSG00000026872 | - | chr2:44968612-44968936    | chr2:44968612-44972720                                                                                           | ENSMUST00000126743                                                                                                                                                                                            | ENSMUST00000076836                                                              |
| AFE | ENSMUSG00000026879 | + | chr2:35138121-35139425    | chr2:35138241-35139425/chr2:3                                                                                    | ENSMUST00000028239,ENSMUST00000124323                                                                                                                                                                         | ENSMUST00000139867/ENSMUST00000113016/                                          |



|     |                    |   |                          |                                                                                                         |                                                                                 |                                                                                                        |
|-----|--------------------|---|--------------------------|---------------------------------------------------------------------------------------------------------|---------------------------------------------------------------------------------|--------------------------------------------------------------------------------------------------------|
|     |                    |   |                          | 5122423-35139425/chr2:3511199<br>3-35139425/chr2:35135238-3513<br>9425                                  |                                                                                 | ENSMUST00000167857/ENSMUST00000142324                                                                  |
| AFE | ENSMUSG00000026879 | + | chr2:35122423-35139425   | chr2:35138241-35139425/chr2:3<br>5138121-35139425/chr2:3511199<br>3-35139425/chr2:35135238-3513<br>9425 | ENSMUST00000113016                                                              | ENSMUST00000139867/ENSMUST00000028239,<br>ENSMUST00000124323/ENSMUST00000167857/<br>ENSMUST00000142324 |
| AFE | ENSMUSG00000026879 | + | chr2:35111993-35139425   | chr2:35138241-35139425/chr2:3<br>5138121-35139425/chr2:3512242<br>3-35139425/chr2:35135238-3513<br>9425 | ENSMUST00000167857                                                              | ENSMUST00000139867/ENSMUST00000028239,<br>ENSMUST00000124323/ENSMUST00000113016/<br>ENSMUST00000142324 |
| AFE | ENSMUSG00000026921 | + | chr2:26439568-26441105   | chr2:26436761-26441105/chr2:2<br>6435629-26441105                                                       | ENSMUST00000102907,ENSMUST00000100290,<br>ENSMUST00000139801,ENSMUST00000102906 | ENSMUST00000080087,ENSMUST00000166920/<br>ENSMUST00000152713                                           |
| AFE | ENSMUSG00000026921 | + | chr2:26436761-26441105   | chr2:26439568-26441105/chr2:2<br>6435629-26441105                                                       | ENSMUST00000080087,ENSMUST00000166920                                           | ENSMUST00000102907,ENSMUST00000100290,E<br>NSMUST00000139801,ENSMUST00000102906/E<br>NSMUST00000152713 |
| AFE | ENSMUSG00000026956 | - | chr2:25220207-25220401   | chr2:25220207-25220847                                                                                  | ENSMUST00000091308,ENSMUST00000102925                                           | ENSMUST00000152537                                                                                     |
| AFE | ENSMUSG00000026970 | - | chr2:60680529-60800748   | chr2:60680529-60719175/chr2:6<br>0680529-60726065/chr2:6068052<br>9-60727047                            | ENSMUST00000028347,ENSMUST00000112510                                           | ENSMUST00000112509,ENSMUST00000164147/<br>ENSMUST00000151846/ENSMUST00000169261,<br>ENSMUST00000132529 |
| AFE | ENSMUSG00000026970 | - | chr2:60680529-60719175   | chr2:60680529-60800748/chr2:6<br>0680529-60726065/chr2:6068052<br>9-60727047                            | ENSMUST00000112509,ENSMUST00000164147                                           | ENSMUST00000028347,ENSMUST00000112510/<br>ENSMUST00000151846/ENSMUST00000169261,<br>ENSMUST00000132529 |
| AFE | ENSMUSG00000027381 | + | chr2:127951988-127954356 | chr2:127953548-127954356                                                                                | ENSMUST00000103210,ENSMUST00000019281,<br>ENSMUST00000103211,ENSMUST00000089634 | ENSMUST00000129206                                                                                     |
| AFE | ENSMUSG00000027580 | - | chr2:180975776-180976517 | chr2:180975776-180976671                                                                                | ENSMUST00000121484                                                              | ENSMUST00000029102,ENSMUST00000087446,E                                                                |

|     |                    |   |                          |                                                                              |                                                                                                        |                                                                                                                                                                     |
|-----|--------------------|---|--------------------------|------------------------------------------------------------------------------|--------------------------------------------------------------------------------------------------------|---------------------------------------------------------------------------------------------------------------------------------------------------------------------|
|     |                    |   |                          |                                                                              |                                                                                                        | NSMUST00000094203,ENSMUST00000155049,E<br>NSMUST00000108831                                                                                                         |
| AFE | ENSMUSG00000027601 | + | chr3:19088892-19100026   | chr3:19088288-19100026/chr3:1<br>9087548-19100026/chr3:1908738<br>6-19100026 | ENSMUST00000132035                                                                                     | ENSMUST00000130645,ENSMUST00000138777,E<br>NSMUST00000029129/ENSMUST00000130806,E<br>NSMUST00000117529/ENSMUST00000119865                                           |
| AFE | ENSMUSG00000027601 | + | chr3:19088288-19100026   | chr3:19088892-19100026/chr3:1<br>9087548-19100026/chr3:1908738<br>6-19100026 | ENSMUST00000130645,ENSMUST00000138777,<br>ENSMUST00000029129                                           | ENSMUST00000132035/ENSMUST00000130806,<br>ENSMUST00000117529/ENSMUST00000119865                                                                                     |
| AFE | ENSMUSG00000027763 | + | chr3:60277095-60399516   | chr3:60333726-60399516/chr3:6<br>0305345-60399516                            | ENSMUST00000169236                                                                                     | ENSMUST00000029327,ENSMUST00000076983,E<br>NSMUST00000099087/ENSMUST00000166251                                                                                     |
| AFE | ENSMUSG00000027763 | + | chr3:60333726-60399516   | chr3:60277095-60399516/chr3:6<br>0305345-60399516                            | ENSMUST00000029327,ENSMUST00000076983,<br>ENSMUST00000099087                                           | ENSMUST00000169236/ENSMUST00000166251                                                                                                                               |
| AFE | ENSMUSG00000027940 | + | chr3:89877767-89890368   | chr3:89884539-89890368/chr3:8<br>9883918-89890368/chr3:8988378<br>5-89890368 | ENSMUST00000121503,ENSMUST00000119570,<br>ENSMUST00000062193                                           | ENSMUST00000127955/ENSMUST00000149432/<br>ENSMUST00000029549,ENSMUST00000131354,E<br>NSMUST00000118566,ENSMUST00000147430,E<br>NSMUST00000029550,ENSMUST00000119158 |
| AFE | ENSMUSG00000028042 | - | chr3:89185437-89196957   | chr3:89185437-89195876/chr3:8<br>9185437-89189584/chr3:8918543<br>7-89190985 | ENSMUST00000029677,ENSMUST00000040116                                                                  | ENSMUST00000107432/ENSMUST00000107435/<br>ENSMUST00000107433                                                                                                        |
| AFE | ENSMUSG00000028101 | + | chr3:96501118-96503343   | chr3:96500454-96503343                                                       | ENSMUST00000064900                                                                                     | ENSMUST00000162934,ENSMUST00000107076                                                                                                                               |
| AFE | ENSMUSG00000028410 | + | chr4:40669666-40670736   | chr4:40670286-40670736/chr4:4<br>0670169-40670736/chr4:4067003<br>4-40670736 | ENSMUST00000030118,ENSMUST00000137476                                                                  | ENSMUST00000149794/ENSMUST00000129204,<br>ENSMUST00000164233,ENSMUST00000125442/<br>ENSMUST00000137246                                                              |
| AFE | ENSMUSG00000028906 | - | chr4:131563353-131604786 | chr4:131563353-131626543/chr4<br>:131563353-131631117                        | ENSMUST00000105969,ENSMUST00000084253,<br>ENSMUST00000141291,ENSMUST00000097859,<br>ENSMUST00000105981 | ENSMUST00000144754,ENSMUST00000030739,E<br>NSMUST00000131953/ENSMUST00000105975                                                                                     |

|     |                    |   |                          |                                                                                         |                                                                                                                                                         |                                                                                                                                                         |
|-----|--------------------|---|--------------------------|-----------------------------------------------------------------------------------------|---------------------------------------------------------------------------------------------------------------------------------------------------------|---------------------------------------------------------------------------------------------------------------------------------------------------------|
| AFE | ENSMUSG00000029082 | + | chr5:44211843-44212849   | chr5:44210332-44212849                                                                  | ENSMUST00000101237                                                                                                                                      | ENSMUST00000126976                                                                                                                                      |
| AFE | ENSMUSG00000029452 | + | chr5:121902379-121913796 | chr5:121903364-121913796/chr5:121902804-121913796/chr5:121913279-121913796              | ENSMUST00000111795                                                                                                                                      | ENSMUST00000078094/ENSMUST00000060004,ENSMUST00000150805,ENSMUST00000145729,ENSMUST00000124247/ENSMUST00000094357,ENSMUST00000031405,ENSMUST00000156080 |
| AFE | ENSMUSG00000029713 | - | chr5:137971137-137971412 | chr5:137971137-137974367                                                                | ENSMUST00000111027,ENSMUST00000150063,ENSMUST00000132525,ENSMUST00000170293,ENSMUST00000111020,ENSMUST00000111023,ENSMUST00000140139,ENSMUST00000031726 | ENSMUST00000143495                                                                                                                                      |
| AFE | ENSMUSG00000029810 | - | chr6:48788364-48790360   | chr6:48788364-48790995                                                                  | ENSMUST00000164733,ENSMUST00000101429                                                                                                                   | ENSMUST00000166247                                                                                                                                      |
| AFE | ENSMUSG00000029823 | + | chr6:38508075-38509204   | chr6:38501908-38509204                                                                  | ENSMUST00000101519,ENSMUST00000159936,ENSMUST00000160511                                                                                                | ENSMUST00000114879,ENSMUST00000162386                                                                                                                   |
| AFE | ENSMUSG00000030047 | - | chr6:87446106-87446217   | chr6:87446106-87482820                                                                  | ENSMUST00000101197,ENSMUST00000145128                                                                                                                   | ENSMUST00000113637                                                                                                                                      |
| AFE | ENSMUSG00000030064 | - | chr6:97373518-97437587   | chr6:97373518-97478724/chr6:97373518-97409188/chr6:97373518-97381358                    | ENSMUST00000032146,ENSMUST00000113353                                                                                                                   | ENSMUST00000113355,ENSMUST00000142589/ENSMUST00000113359/ENSMUST00000124050                                                                             |
| AFE | ENSMUSG00000030087 | + | chr6:90412719-90416414   | chr6:90415451-90416414                                                                  | ENSMUST00000032174                                                                                                                                      | ENSMUST00000113530                                                                                                                                      |
| AFE | ENSMUSG00000030168 | - | chr6:119320426-119338500 | chr6:119320426-119367438                                                                | ENSMUST00000169744                                                                                                                                      | ENSMUST00000032272                                                                                                                                      |
| AFE | ENSMUSG00000030201 | - | chr6:134470611-134491670 | chr6:134470611-134516661                                                                | ENSMUST00000032322                                                                                                                                      | ENSMUST00000126836                                                                                                                                      |
| AFE | ENSMUSG00000030276 | + | chr6:113342890-113343097 | chr6:113340812-113343097/chr6:113339536-113343097                                       | ENSMUST00000032414,ENSMUST00000038889                                                                                                                   | ENSMUST00000129894/ENSMUST00000140505                                                                                                                   |
| AFE | ENSMUSG00000030495 | + | chr7:35971669-35982234   | chr7:35980310-35982234                                                                  | ENSMUST00000167441                                                                                                                                      | ENSMUST00000131048,ENSMUST00000001854                                                                                                                   |
| AFE | ENSMUSG00000030695 | - | chr7:133941640-133943516 | chr7:133941640-133942559                                                                | ENSMUST00000133514                                                                                                                                      | ENSMUST00000087566                                                                                                                                      |
| AFE | ENSMUSG00000030695 | - | chr7:133941290-133943516 | chr7:133941290-133942559/chr7:133941290-133941488/chr7:133941290-133943802/chr7:1339412 | ENSMUST00000151137                                                                                                                                      | ENSMUST00000032934/ENSMUST00000133514,ENSMUST00000087566/ENSMUST00000141355,ENSMUST00000106348/ENSMUST00000135707                                       |

|     |                    |   |                          |                                                                            |                                                                                                |                                                                                                                   |
|-----|--------------------|---|--------------------------|----------------------------------------------------------------------------|------------------------------------------------------------------------------------------------|-------------------------------------------------------------------------------------------------------------------|
|     |                    |   |                          | 90-133941710                                                               |                                                                                                |                                                                                                                   |
| AFE | ENSMUSG00000030737 | - | chr7:106840403-106855021 | chr7:106840403-106859773/chr7:106840403-106843573/chr7:106840403-106844045 | ENSMUST00000168867,ENSMUST00000107088                                                          | ENSMUST00000032985/ENSMUST00000137914,ENSMUST00000145381/ENSMUST00000107086                                       |
| AFE | ENSMUSG00000030986 | - | chr7:140940719-140951083 | chr7:140940719-140968285                                                   | ENSMUST00000140593,ENSMUST00000033290,ENSMUST00000063669                                       | ENSMUST00000106139                                                                                                |
| AFE | ENSMUSG00000031328 | - | chrX:71471673-71472200   | chrX:71471673-71471756                                                     | ENSMUST00000130007,ENSMUST00000144429,ENSMUST00000033699,ENSMUST00000101454,ENSMUST00000114299 | ENSMUST00000156766                                                                                                |
| AFE | ENSMUSG00000031570 | + | chr8:26830847-26831027   | chr8:26830807-26831027/chr8:26830955-26831027                              | ENSMUST00000138879,ENSMUST00000139836,ENSMUST00000068916,ENSMUST00000095387,ENSMUST00000133117 | ENSMUST00000124764,ENSMUST00000145678/ENSMUST00000138548                                                          |
| AFE | ENSMUSG00000031851 | + | chr8:128258249-128259968 | chr8:128259786-128259968/chr8:128257131-128259968/chr8:128253962-128259968 | ENSMUST00000065135,ENSMUST00000034313                                                          | ENSMUST00000152189/ENSMUST00000151172,ENSMUST00000138656,ENSMUST00000146055/ENSMUST00000143504                    |
| AFE | ENSMUSG00000031851 | + | chr8:128257131-128259968 | chr8:128258249-128259968/chr8:128259786-128259968/chr8:128253962-128259968 | ENSMUST00000151172,ENSMUST00000138656,ENSMUST00000146055                                       | ENSMUST00000065135,ENSMUST00000034313/ENSMUST00000152189/ENSMUST00000143504                                       |
| AFE | ENSMUSG00000032125 | + | chr9:37209736-37210737   | chr9:37210472-37210737                                                     | ENSMUST00000163262                                                                             | ENSMUST00000115046,ENSMUST00000102895,ENSMUST00000172374,ENSMUST00000156972,ENSMUST00000063237,ENSMUST00000115048 |
| AFE | ENSMUSG00000032812 | + | chr7:108496713-108515535 | chr7:108510750-108515535/chr7:108509853-108515535                          | ENSMUST00000107010,ENSMUST00000107011                                                          | ENSMUST00000138628,ENSMUST00000133423/ENSMUST00000137384                                                          |
| AFE | ENSMUSG00000032812 | + | chr7:108533554-108534066 | chr7:108533938-108534066/chr7:108527046-108534066                          | ENSMUST00000107010,ENSMUST00000107011,ENSMUST00000127873,ENSMUST00000084896,ENSMUST00000148902 | ENSMUST00000134143/ENSMUST00000084895                                                                             |

|     |                    |   |                           |                                                                                                     |                                                          |                                                                                                                   |
|-----|--------------------|---|---------------------------|-----------------------------------------------------------------------------------------------------|----------------------------------------------------------|-------------------------------------------------------------------------------------------------------------------|
| AFE | ENSMUSG00000032812 | + | chr7:108522015-108533376  | chr7:108531498-108533376/chr7:108531470-108533376/chr7:108527046-108533376/chr7:108532620-108533376 | ENSMUST00000107010,ENSMUST00000107011,ENSMUST00000084896 | ENSMUST00000141083/ENSMUST00000152082/ENSMUST00000127873/ENSMUST00000148902                                       |
| AFE | ENSMUSG00000032812 | + | chr7:108527046-108533376  | chr7:108522015-108533376/chr7:108531498-108533376/chr7:108531470-108533376/chr7:108532620-108533376 | ENSMUST00000127873                                       | ENSMUST00000107010,ENSMUST00000107011,ENSMUST00000084896/ENSMUST00000141083/ENSMUST00000152082/ENSMUST00000148902 |
| AFE | ENSMUSG00000034006 | + | chr18:80452149-80453521   | chr18:80453142-80453521/chr18:80453057-80453521/chr18:80452612-80453521                             | ENSMUST00000123750,ENSMUST00000131780,ENSMUST00000157056 | ENSMUST00000134545,ENSMUST00000091798,ENSMUST00000070135/ENSMUST00000151677,ENSMUST00000129043/ENSMUST00000144468 |
| AFE | ENSMUSG00000034255 | - | chr11:103201718-103221561 | chr11:103201718-103217579/chr11:103201718-103205824                                                 | ENSMUST00000107024,ENSMUST00000116102                    | ENSMUST00000136491/ENSMUST00000041385                                                                             |
| AFE | ENSMUSG00000034377 | + | chr17:6139156-6176829     | chr17:6106996-6176829/chr17:6106582-6176829                                                         | ENSMUST00000039655,ENSMUST00000141059                    | ENSMUST00000149756/ENSMUST00000142030                                                                             |
| AFE | ENSMUSG00000034377 | + | chr17:6106996-6176829     | chr17:6139156-6176829/chr17:6106582-6176829                                                         | ENSMUST00000149756                                       | ENSMUST00000039655,ENSMUST00000141059/ENSMUST00000142030                                                          |
| AFE | ENSMUSG00000036402 | + | chr6:66846983-66864447    | chr6:66846521-66864447/chr6:66846509-66864447                                                       | ENSMUST00000114222                                       | ENSMUST00000114228,ENSMUST00000043148,ENSMUST00000114226/ENSMUST00000114227,ENSMUST00000114225,ENSMUST00000114224 |
| AFE | ENSMUSG00000036854 | + | chr7:31338081-31339281    | chr7:31337746-31339281/chr7:31338954-31339281/chr7:31338551-31339281                                | ENSMUST00000126989                                       | ENSMUST00000123355/ENSMUST00000146732/ENSMUST00000044048                                                          |
| AFE | ENSMUSG00000038170 | - | chr3:97562853-97596662    | chr3:97562853-97570397                                                                              | ENSMUST00000107038,ENSMUST00000090750,ENSMUST00000168438 | ENSMUST00000045243                                                                                                |
| AFE | ENSMUSG00000038311 | + | chr17:36282147-36292244   | chr17:36292084-36292244                                                                             | ENSMUST00000056774                                       | ENSMUST00000090537                                                                                                |

|     |                    |   |                          |                                                                                                         |                                                              |                                                                                 |
|-----|--------------------|---|--------------------------|---------------------------------------------------------------------------------------------------------|--------------------------------------------------------------|---------------------------------------------------------------------------------|
| AFE | ENSMUSG00000038375 | + | chr2:155208665-155211026 | chr2:155207753-155211026/chr2:<br>:155206928-155211026                                                  | ENSMUST00000134218                                           | ENSMUST00000043237/ENSMUST00000151466                                           |
| AFE | ENSMUSG00000038375 | + | chr2:155207753-155211026 | chr2:155208665-155211026/chr2:<br>:155206928-155211026                                                  | ENSMUST00000043237                                           | ENSMUST00000134218/ENSMUST00000151466                                           |
| AFE | ENSMUSG00000038406 | - | chr7:52269705-52270835   | chr7:52269705-52271450                                                                                  | ENSMUST00000151264                                           | ENSMUST00000153243                                                              |
| AFE | ENSMUSG00000038406 | - | chr7:52268963-52271450   | chr7:52268963-52269575                                                                                  | ENSMUST00000085383,ENSMUST00000171446                        | ENSMUST00000151264,ENSMUST00000153243,E<br>NSMUST00000117282                    |
| AFE | ENSMUSG00000038521 | - | chr6:124491506-124492211 | chr6:124491506-124492206/chr6:<br>:124491506-124492216/chr6:124<br>491506-124492286                     | ENSMUST00000160505                                           | ENSMUST00000162844/ENSMUST00000159463/<br>ENSMUST00000162443                    |
| AFE | ENSMUSG00000038811 | + | chr11:95704109-95705126  | chr11:95703740-95705126/chr11<br>:95704706-95705126                                                     | ENSMUST00000100532                                           | ENSMUST00000107711,ENSMUST00000107714/<br>ENSMUST00000107709                    |
| AFE | ENSMUSG00000039697 | - | chr10:30374248-30375443  | chr10:30374248-30382100                                                                                 | ENSMUST00000099982,ENSMUST00000092610,<br>ENSMUST00000105514 | ENSMUST00000068567                                                              |
| AFE | ENSMUSG00000039952 | - | chr9:108155488-108165812 | chr9:108155488-108166111                                                                                | ENSMUST00000171412                                           | ENSMUST00000080435                                                              |
| AFE | ENSMUSG00000040181 | - | chr1:164789693-164789932 | chr1:164789693-164796370                                                                                | ENSMUST00000111518,ENSMUST00000134098                        | ENSMUST00000046049                                                              |
| AFE | ENSMUSG00000040479 | - | chr2:91785026-91805577   | chr2:91785026-91803443/chr2:9<br>1785026-91785331/chr2:9178502<br>6-91815724/chr2:91785026-9178<br>5983 | ENSMUST00000128152                                           | ENSMUST00000028667/ENSMUST00000111303/<br>ENSMUST00000099709/ENSMUST00000142090 |
| AFE | ENSMUSG00000040479 | - | chr2:91785026-91785331   | chr2:91785026-91803443/chr2:9<br>1785026-91805577/chr2:9178502<br>6-91815724/chr2:91785026-9178<br>5983 | ENSMUST00000111303                                           | ENSMUST00000028667/ENSMUST00000128152/<br>ENSMUST00000099709/ENSMUST00000142090 |
| AFE | ENSMUSG00000040813 | - | chr9:106587326-106587575 | chr9:106587326-106588166                                                                                | ENSMUST00000163441                                           | ENSMUST00000046735                                                              |
| AFE | ENSMUSG00000042010 | + | chr5:114616149-114634059 | chr5:114626199-114634059                                                                                | ENSMUST00000031583,ENSMUST00000102582                        | ENSMUST00000146841                                                              |

|     |                    |   |                          |                                                                                                 |                                       |                                                                                                                                                                                                                                     |
|-----|--------------------|---|--------------------------|-------------------------------------------------------------------------------------------------|---------------------------------------|-------------------------------------------------------------------------------------------------------------------------------------------------------------------------------------------------------------------------------------|
| AFE | ENSMUSG00000042622 | + | chr15:79178676-79187397  | chr15:79178184-79187397                                                                         | ENSMUST00000163691                    | ENSMUST00000096350                                                                                                                                                                                                                  |
| AFE | ENSMUSG00000042842 | + | chr13:33060543-33063340  | chr13:33057412-33063340                                                                         | ENSMUST00000017184,ENSMUST00000110293 | ENSMUST00000164541                                                                                                                                                                                                                  |
| AFE | ENSMUSG00000044328 | - | chr11:77326467-77326662  | chr11:77326467-77329052                                                                         | ENSMUST00000060417,ENSMUST00000094005 | ENSMUST00000136101                                                                                                                                                                                                                  |
| AFE | ENSMUSG00000044934 | - | chr13:64246988-64253697  | chr13:64246988-64251378/chr13:64246988-64253908                                                 | ENSMUST00000152644                    | ENSMUST00000134136/ENSMUST00000117241,ENSMUST00000059817                                                                                                                                                                            |
| AFE | ENSMUSG00000045983 | + | chr16:20672949-20674301  | chr16:20674034-20674301                                                                         | ENSMUST00000140576                    | ENSMUST00000115463,ENSMUST00000073840,ENSMUST00000154950,ENSMUST00000156226,ENSMUST00000141034,ENSMUST00000150333,ENSMUST00000115460,ENSMUST00000044783,ENSMUST00000128594,ENSMUST00000170807,ENSMUST00000142344,ENSMUST00000115461 |
| AFE | ENSMUSG00000049775 | - | chrX:163645983-163647038 | chrX:163645983-163646255/chrX:163645983-163646940                                               | ENSMUST00000112172                    | ENSMUST00000112175/ENSMUST00000112176                                                                                                                                                                                               |
| AFE | ENSMUSG00000049775 | - | chrX:163645983-163646255 | chrX:163645983-163647038/chrX:163645983-163646940                                               | ENSMUST00000112175                    | ENSMUST00000112172/ENSMUST00000112176                                                                                                                                                                                               |
| AFE | ENSMUSG00000051355 | - | chr11:22856692-22872651  | chr11:22856692-22873900/chr11:22856692-22882079                                                 | ENSMUST00000162924                    | ENSMUST00000057843/ENSMUST00000159081,ENSMUST00000160826,ENSMUST00000093270                                                                                                                                                         |
| AFE | ENSMUSG00000051853 | - | chr15:98571865-98573024  | chr15:98571865-98593411                                                                         | ENSMUST00000053183                    | ENSMUST00000129354                                                                                                                                                                                                                  |
| AFE | ENSMUSG00000053565 | - | chr7:29763009-29765463   | chr7:29763009-29766693                                                                          | ENSMUST00000066070                    | ENSMUST00000098615                                                                                                                                                                                                                  |
| AFE | ENSMUSG00000053897 | + | chr3:135488764-135489204 | chr3:135489047-135489204/chr3:135488495-135489204                                               | ENSMUST00000139953                    | ENSMUST00000167390/ENSMUST00000081978                                                                                                                                                                                               |
| AFE | ENSMUSG00000055322 | - | chr1:74043678-74044819   | chr1:74043678-74048861                                                                          | ENSMUST00000050681                    | ENSMUST00000169786,ENSMUST00000171899                                                                                                                                                                                               |
| AFE | ENSMUSG00000055491 | + | chr19:46119552-46135893  | chr19:46131849-46135893/chr19:46131383-46135893/chr19:46131349-46135893/chr19:46131233-46135893 | ENSMUST00000134015                    | ENSMUST00000147640,ENSMUST00000126127/ENSMUST00000150158/ENSMUST00000135327/ENSMUST00000062322,ENSMUST00000111899,ENSMUST00000099392                                                                                                |

|     |                    |   |                           |                                                                                                                                                                         |                                                          |                                                                                                                                                         |
|-----|--------------------|---|---------------------------|-------------------------------------------------------------------------------------------------------------------------------------------------------------------------|----------------------------------------------------------|---------------------------------------------------------------------------------------------------------------------------------------------------------|
| AFE | ENSMUSG00000055850 | - | chr6:72311220-72311406    | chr6:72311220-72312235/chr6:72311220-72312270/chr6:72311220-72312311/chr6:72311220-72311306                                                                             | ENSMUST00000133978,ENSMUST00000154098,ENSMUST00000069580 | ENSMUST00000151063/ENSMUST00000126065/ENSMUST00000069595/ENSMUST00000130064,ENSMUST00000125554                                                          |
| AFE | ENSMUSG00000057411 | - | chr17:25928621-25928998   | chr17:25928621-25929276                                                                                                                                                 | ENSMUST00000072735                                       | ENSMUST00000164133                                                                                                                                      |
| AFE | ENSMUSG00000057530 | + | chr4:137469544-137469683  | chr4:137418296-137469683/chr4:137461070-137469683                                                                                                                       | ENSMUST00000073194,ENSMUST00000151110                    | ENSMUST00000130407/ENSMUST00000102518                                                                                                                   |
| AFE | ENSMUSG00000057530 | + | chr4:137418296-137469683  | chr4:137469544-137469683/chr4:137461070-137469683                                                                                                                       | ENSMUST00000130407                                       | ENSMUST00000073194,ENSMUST00000151110/ENSMUST00000102518                                                                                                |
| AFE | ENSMUSG00000059013 | + | chr2:32580919-32593039    | chr2:32591442-32593039                                                                                                                                                  | ENSMUST00000074248                                       | ENSMUST00000141670                                                                                                                                      |
| AFE | ENSMUSG00000059248 | + | chr11:117127909-117151712 | chr11:117094033-117151712/chr11:117080245-117151712                                                                                                                     | ENSMUST00000019038                                       | ENSMUST00000106354/ENSMUST00000093907                                                                                                                   |
| AFE | ENSMUSG00000059248 | + | chr11:117094033-117151712 | chr11:117127909-117151712/chr11:117080245-117151712                                                                                                                     | ENSMUST00000106354                                       | ENSMUST00000019038/ENSMUST00000093907                                                                                                                   |
| AFE | ENSMUSG00000059325 | - | chr5:77524047-77524176    | chr5:77524047-77543872                                                                                                                                                  | ENSMUST00000113453                                       | ENSMUST00000081964                                                                                                                                      |
| AFE | ENSMUSG00000060126 | + | chr14:76245497-76246010   | chr14:76245754-76246010/chr14:76245263-76246010                                                                                                                         | ENSMUST00000154533,ENSMUST00000110894                    | ENSMUST00000134040/ENSMUST00000142061                                                                                                                   |
| AFE | ENSMUSG00000060147 | - | chr13:34023515-34027791   | chr13:34023515-34027438/chr13:34023515-34027442/chr13:34023515-34027488/chr13:34023515-34027496/chr13:34023515-34027636/chr13:34023515-34088112/chr13:34023515-34094335 | ENSMUST00000171985,ENSMUST00000043552                    | ENSMUST00000171252/ENSMUST00000167260/ENSMUST00000170991/ENSMUST00000017188/ENSMUST00000168350/ENSMUST00000171034,ENSMUST00000168400/ENSMUST00000166354 |
| AFE | ENSMUSG00000060548 | - | chr14:61643673-61656687   | chr14:61643673-61664952                                                                                                                                                 | ENSMUST00000111236                                       | ENSMUST00000111234,ENSMUST00000077444                                                                                                                   |
| AFE | ENSMUSG00000068036 | + | chr17:14036465-14039537   | chr17:14036234-14039537                                                                                                                                                 | ENSMUST00000124922                                       | ENSMUST00000133422,ENSMUST00000137531,ENSMUST00000150848,ENSMUST00000137784,E                                                                           |



|     |                    |   |                          |                                                                                                                                |                                                                                                        |                                                                                                        |
|-----|--------------------|---|--------------------------|--------------------------------------------------------------------------------------------------------------------------------|--------------------------------------------------------------------------------------------------------|--------------------------------------------------------------------------------------------------------|
|     |                    |   |                          |                                                                                                                                |                                                                                                        | NSMUST00000170827,ENSMUST00000139666,E<br>NSMUST00000165039                                            |
| AFE | ENSMUSG00000070436 | - | chr7:106497974-106500334 | chr7:106497974-106501392                                                                                                       | ENSMUST00000094154                                                                                     | ENSMUST00000169437                                                                                     |
| AFE | ENSMUSG00000071176 | + | chr8:14996434-14997542   | chr8:14991234-14997542                                                                                                         | ENSMUST00000162636                                                                                     | ENSMUST00000084207,ENSMUST00000163062,E<br>NSMUST00000110800                                           |
| AFE | ENSMUSG00000074457 | + | chr3:90345239-90345916   | chr3:90343387-90345916/chr3:9<br>0342943-90345916/chr3:9034133<br>9-90345916/chr3:90345116-9034<br>5916/chr3:90345112-90345916 | ENSMUST00000098910                                                                                     | ENSMUST00000150833/ENSMUST00000107334/<br>ENSMUST00000098911/ENSMUST00000107331/<br>ENSMUST00000107333 |
| AFE | ENSMUSG00000075254 | + | chr16:33756854-33760844  | chr16:33751295-33760844                                                                                                        | ENSMUST00000128105                                                                                     | ENSMUST00000126532,ENSMUST00000152782                                                                  |
| AFE | ENSMUSG00000078440 | + | chr10:80850663-80853104  | chr10:80851875-80853104/chr10<br>:80850225-80853104                                                                            | ENSMUST00000131968                                                                                     | ENSMUST00000125635/ENSMUST00000144647                                                                  |
| AFE | ENSMUSG00000090137 | - | chr8:73033533-73034583   | chr8:73033533-73034017/chr8:7<br>3033533-73034237                                                                              | ENSMUST00000135446                                                                                     | ENSMUST00000129909/ENSMUST00000125184                                                                  |
| AFE | ENSMUSG00000090137 | - | chr8:73033533-73034017   | chr8:73033533-73034583/chr8:7<br>3033533-73034237                                                                              | ENSMUST00000129909                                                                                     | ENSMUST00000135446/ENSMUST00000125184                                                                  |
| ALE | ENSMUSG00000001403 | + | chr2:164597726-164598004 | chr2:164597726-164602690                                                                                                       | ENSMUST00000088248                                                                                     | ENSMUST00000001439                                                                                     |
| ALE | ENSMUSG00000001419 | + | chr3:87971656-87971960   | chr3:87971656-87972554                                                                                                         | ENSMUST00000172414,ENSMUST00000119251,<br>ENSMUST00000001455,ENSMUST00000107559,<br>ENSMUST00000107558 | ENSMUST00000139153                                                                                     |
| ALE | ENSMUSG00000001472 | + | chr8:125924597-125927047 | chr8:125924597-125924834/chr8<br>:125924597-125924976                                                                          | ENSMUST00000108840                                                                                     | ENSMUST00000093050/ENSMUST00000057934,<br>ENSMUST00000108839                                           |
| ALE | ENSMUSG00000001964 | + | chrX:71501215-71502217   | chrX:71501215-71506121                                                                                                         | ENSMUST00000088313,ENSMUST00000096424,<br>ENSMUST00000152288,ENSMUST00000002029                        | ENSMUST00000119197                                                                                     |
| ALE | ENSMUSG00000004567 | + | chr8:3512865-3514783     | chr8:3512865-3513301                                                                                                           | ENSMUST00000162797,ENSMUST00000004683                                                                  | ENSMUST00000111076                                                                                     |
| ALE | ENSMUSG00000004980 | - | chr6:51413253-51413410   | chr6:51411432-51413410                                                                                                         | ENSMUST00000114459                                                                                     | ENSMUST00000090002,ENSMUST00000069949                                                                  |

|     |                    |   |                           |                                                                                     |                                                                                                                           |                                                                                                        |
|-----|--------------------|---|---------------------------|-------------------------------------------------------------------------------------|---------------------------------------------------------------------------------------------------------------------------|--------------------------------------------------------------------------------------------------------|
| ALE | ENSMUSG00000005763 | + | chr1:167789955-167791135  | chr1:167789955-167796786/chr1:<br>:167789955-167799149                              | ENSMUST00000005907,ENSMUST00000159070                                                                                     | ENSMUST00000161559,ENSMUST00000086002,E<br>NSMUST00000027849/ENSMUST00000161971                        |
| ALE | ENSMUSG00000005763 | + | chr1:167789955-167796786  | chr1:167789955-167791135/chr1:<br>:167789955-167799149                              | ENSMUST00000161559,ENSMUST00000086002,<br>ENSMUST00000027849                                                              | ENSMUST0000005907,ENSMUST00000159070/<br>ENSMUST00000161971                                            |
| ALE | ENSMUSG00000006378 | + | chr15:78867304-78867573   | chr15:78867304-78872358                                                             | ENSMUST00000006544                                                                                                        | ENSMUST00000171999                                                                                     |
| ALE | ENSMUSG00000008682 | + | chrX:71517656-71518011    | chrX:71517656-71518254                                                              | ENSMUST00000151702,ENSMUST00000134330,<br>ENSMUST00000149171,ENSMUST00000008826,<br>ENSMUST00000125775,ENSMUST00000074085 | ENSMUST00000135690                                                                                     |
| ALE | ENSMUSG00000010025 | - | chr11:61038188-61062364   | chr11:61059823-61062364/chr11:<br>:61061984-61062364                                | ENSMUST00000071413,ENSMUST00000066277                                                                                     | ENSMUST00000074127/ENSMUST00000108715                                                                  |
| ALE | ENSMUSG00000015942 | + | chr5:134690539-134692006  | chr5:134690539-134692116/chr5:<br>:134690539-134690821/chr5:134<br>690539-134697663 | ENSMUST00000016086,ENSMUST00000128842                                                                                     | ENSMUST00000152587/ENSMUST00000135588/<br>ENSMUST00000123941                                           |
| ALE | ENSMUSG00000017119 | + | chr11:101415412-101429713 | chr11:101415412-101417124                                                           | ENSMUST00000149170                                                                                                        | ENSMUST00000107208,ENSMUST00000123558,E<br>NSMUST00000103098,ENSMUST00000107213,E<br>NSMUST00000103099 |
| ALE | ENSMUSG00000020610 | + | chr11:109296070-109313076 | chr11:109296070-109297877                                                           | ENSMUST00000020929                                                                                                        | ENSMUST00000103061,ENSMUST00000092500                                                                  |
| ALE | ENSMUSG00000021254 | + | chr12:87610011-87622399   | chr12:87610011-87629750                                                             | ENSMUST00000071106                                                                                                        | ENSMUST00000110212                                                                                     |
| ALE | ENSMUSG00000021268 | + | chr12:110796530-110809601 | chr12:110796530-110796850                                                           | ENSMUST00000143836,ENSMUST00000143847                                                                                     | ENSMUST00000143272,ENSMUST00000128458,E<br>NSMUST00000146701,ENSMUST00000124106,E<br>NSMUST00000021696 |
| ALE | ENSMUSG00000021493 | - | chr13:55608484-55608691   | chr13:55607728-55608691                                                             | ENSMUST00000069968,ENSMUST00000069929                                                                                     | ENSMUST00000046246,ENSMUST00000155098,E<br>NSMUST00000109909                                           |
| ALE | ENSMUSG00000021624 | + | chr13:103492947-103494785 | chr13:103492947-103529246                                                           | ENSMUST00000022124                                                                                                        | ENSMUST00000170878                                                                                     |
| ALE | ENSMUSG00000022436 | + | chr15:78740529-78741769   | chr15:78740529-78742360/chr15:<br>:78740529-78748560                                | ENSMUST00000001226,ENSMUST00000109695                                                                                     | ENSMUST00000109698/ENSMUST00000134703                                                                  |

|     |                    |   |                          |                                                   |                                                                                                                                                                                                                                                                                                   |                                                                                                                                                  |
|-----|--------------------|---|--------------------------|---------------------------------------------------|---------------------------------------------------------------------------------------------------------------------------------------------------------------------------------------------------------------------------------------------------------------------------------------------------|--------------------------------------------------------------------------------------------------------------------------------------------------|
| ALE | ENSMUSG00000022565 | - | chr15:76012329-76013340  | chr15:76008815-76013340                           | ENSMUST00000054449,ENSMUST00000169714,<br>ENSMUST00000080857,ENSMUST00000089610,<br>ENSMUST00000171562,ENSMUST00000073418,<br>ENSMUST00000169438,ENSMUST00000071869,<br>ENSMUST00000076355,ENSMUST00000076442,<br>ENSMUST00000074834,ENSMUST00000072692,<br>ENSMUST00000023226,ENSMUST00000169108 | ENSMUST00000165210                                                                                                                               |
| ALE | ENSMUSG00000022884 | + | chr16:23111969-23113240  | chr16:23111969-23112424                           | ENSMUST00000147117,ENSMUST00000023599,<br>ENSMUST00000168891,ENSMUST00000131871,<br>ENSMUST00000115341                                                                                                                                                                                            | ENSMUST00000077605,ENSMUST00000123413                                                                                                            |
| ALE | ENSMUSG00000023092 | + | chrX:54043223-54045021   | chrX:54043223-54043641                            | ENSMUST00000114770,ENSMUST00000114768                                                                                                                                                                                                                                                             | ENSMUST00000116596,ENSMUST00000114773,E<br>NSMUST00000023854,ENSMUST00000114772,E<br>NSMUST00000144600,ENSMUST00000114769                        |
| ALE | ENSMUSG00000023944 | - | chr17:45708568-45708714  | chr17:45706499-45708714                           | ENSMUST00000130406                                                                                                                                                                                                                                                                                | ENSMUST00000165127                                                                                                                               |
| ALE | ENSMUSG00000026254 | + | chr1:89122808-89124376   | chr1:89122808-89129169                            | ENSMUST00000113231,ENSMUST00000113233                                                                                                                                                                                                                                                             | ENSMUST00000050876                                                                                                                               |
| ALE | ENSMUSG00000027088 | + | chr2:69630548-69633533   | chr2:69630548-69637366                            | ENSMUST00000028494,ENSMUST00000112266                                                                                                                                                                                                                                                             | ENSMUST00000128765                                                                                                                               |
| ALE | ENSMUSG00000027180 | + | chr2:103895183-103900039 | chr2:103895183-103896158                          | ENSMUST00000028603                                                                                                                                                                                                                                                                                | ENSMUST00000143799                                                                                                                               |
| ALE | ENSMUSG00000027194 | - | chr2:94168642-94170675   | chr2:94166975-94170675                            | ENSMUST00000094801                                                                                                                                                                                                                                                                                | ENSMUST00000111238,ENSMUST00000111237,E<br>NSMUST00000055081,ENSMUST00000170623                                                                  |
| ALE | ENSMUSG00000027651 | + | chr2:157875949-157956875 | chr2:157875949-157884388                          | ENSMUST00000152452                                                                                                                                                                                                                                                                                | ENSMUST00000103123,ENSMUST00000099135,E<br>NSMUST00000156552,ENSMUST00000109518,E<br>NSMUST00000128206,ENSMUST00000135603,E<br>NSMUST00000029180 |
| ALE | ENSMUSG00000027940 | + | chr3:89894001-89894935   | chr3:89894001-89902297/chr3:8<br>9894001-89903450 | ENSMUST00000121503,ENSMUST00000118566,<br>ENSMUST00000029550                                                                                                                                                                                                                                      | ENSMUST00000119158/ENSMUST00000029549,<br>ENSMUST00000119570,ENSMUST00000062193                                                                  |
| ALE | ENSMUSG00000027940 | + | chr3:89895013-89895853   | chr3:89895013-89902297/chr3:8                     | ENSMUST00000121503                                                                                                                                                                                                                                                                                | ENSMUST00000136125/ENSMUST00000118566,                                                                                                           |

|     |                    |   |                          |                                                                              |                                                                                 |                                                                                                                                                                                                                                                                                                   |
|-----|--------------------|---|--------------------------|------------------------------------------------------------------------------|---------------------------------------------------------------------------------|---------------------------------------------------------------------------------------------------------------------------------------------------------------------------------------------------------------------------------------------------------------------------------------------------|
|     |                    |   |                          | 9895013-89903450                                                             |                                                                                 | ENSMUST00000029550                                                                                                                                                                                                                                                                                |
| ALE | ENSMUSG00000028273 | - | chr3:141940965-141966907 | chr3:141966385-141966907                                                     | ENSMUST00000029941                                                              | ENSMUST00000168967,ENSMUST00000090134,E<br>NSMUST00000058626,ENSMUST00000170361,E<br>NSMUST00000084039                                                                                                                                                                                            |
| ALE | ENSMUSG00000028464 | - | chr4:43528875-43531102   | chr4:43527733-43531102                                                       | ENSMUST00000030184,ENSMUST00000107913                                           | ENSMUST00000150262,ENSMUST00000107914                                                                                                                                                                                                                                                             |
| ALE | ENSMUSG00000028464 | - | chr4:43528713-43532261   | chr4:43532169-43532261                                                       | ENSMUST00000133355                                                              | ENSMUST00000034926,ENSMUST00000150262,E<br>NSMUST00000030184,ENSMUST00000107914,E<br>NSMUST00000107913                                                                                                                                                                                            |
| ALE | ENSMUSG00000028745 | + | chr4:138843747-138844776 | chr4:138843747-138846918                                                     | ENSMUST00000150077,ENSMUST00000102507                                           | ENSMUST00000030518,ENSMUST00000102508,E<br>NSMUST00000042675                                                                                                                                                                                                                                      |
| ALE | ENSMUSG00000029203 | + | chr5:65983214-65985659   | chr5:65983214-65986114                                                       | ENSMUST00000142407,ENSMUST00000164549,<br>ENSMUST00000031105,ENSMUST00000131873 | ENSMUST00000122141                                                                                                                                                                                                                                                                                |
| ALE | ENSMUSG00000030337 | + | chr6:125169655-125190353 | chr6:125169655-125170068                                                     | ENSMUST00000063588                                                              | ENSMUST00000032487                                                                                                                                                                                                                                                                                |
| ALE | ENSMUSG00000031167 | - | chrX:7718334-7720373     | chrX:7720081-7720373                                                         | ENSMUST00000115619                                                              | ENSMUST00000115615                                                                                                                                                                                                                                                                                |
| ALE | ENSMUSG00000031167 | - | chrX:7718334-7720377     | chrX:7720081-7720377                                                         | ENSMUST00000040010                                                              | ENSMUST00000115620,ENSMUST00000115616                                                                                                                                                                                                                                                             |
| ALE | ENSMUSG00000031402 | - | chrX:72359005-72376064   | chrX:72371219-72376064                                                       | ENSMUST00000132935                                                              | ENSMUST00000155742                                                                                                                                                                                                                                                                                |
| ALE | ENSMUSG00000032366 | - | chr9:66877549-66878836   | chr9:66875974-66878836/chr9:6<br>6872372-66878836/chr9:6687124<br>8-66878836 | ENSMUST00000113685,ENSMUST00000050905,<br>ENSMUST00000030185,ENSMUST00000113684 | ENSMUST00000113686,ENSMUST00000113687/<br>ENSMUST00000113689,ENSMUST00000113690,E<br>NSMUST00000113693/ENSMUST00000113701,E<br>NSMUST00000113696,ENSMUST00000113705,E<br>NSMUST00000129733,ENSMUST00000113695,E<br>NSMUST00000139046,ENSMUST00000034928,E<br>NSMUST00000113697,ENSMUST00000113707 |
| ALE | ENSMUSG00000032366 | - | chr9:66875974-66878836   | chr9:66877549-66878836/chr9:6<br>6872372-66878836/chr9:6687124<br>8-66878836 | ENSMUST00000113686,ENSMUST00000113687                                           | ENSMUST00000113685,ENSMUST00000050905,E<br>NSMUST00000030185,ENSMUST00000113684/E<br>NSMUST00000113689,ENSMUST00000113690,E                                                                                                                                                                       |

|     |                    |   |                          |                                                                      |                                                                                 |                                                                                                                                                                                                                                                                                                                          |
|-----|--------------------|---|--------------------------|----------------------------------------------------------------------|---------------------------------------------------------------------------------|--------------------------------------------------------------------------------------------------------------------------------------------------------------------------------------------------------------------------------------------------------------------------------------------------------------------------|
|     |                    |   |                          |                                                                      |                                                                                 | NSMUST00000113693,ENSMUST00000113701,E<br>NSMUST00000113696,ENSMUST00000113705,E<br>NSMUST00000129733,ENSMUST00000113695,E<br>NSMUST00000139046,ENSMUST00000034928,E<br>NSMUST00000113697,ENSMUST00000113707                                                                                                             |
| ALE | ENSMUSG00000032366 | - | chr9:66872372-66878836   | chr9:66877549-66878836/chr9:66875974-66878836/chr9:66871248-66878836 | ENSMUST00000113689,ENSMUST00000113690,ENSMUST00000113693                        | ENSMUST00000113685,ENSMUST00000050905,E<br>NSMUST00000030185,ENSMUST00000113684/E<br>NSMUST00000113686,ENSMUST00000113687/E<br>NSMUST00000113701,ENSMUST00000113696,E<br>NSMUST00000113705,ENSMUST00000129733,E<br>NSMUST00000113695,ENSMUST00000139046,E<br>NSMUST00000034928,ENSMUST00000113697,E<br>NSMUST00000113707 |
| ALE | ENSMUSG00000034377 | + | chr17:6106996-6121828    | chr17:6106996-6137211                                                | ENSMUST00000146758                                                              | ENSMUST00000152672                                                                                                                                                                                                                                                                                                       |
| ALE | ENSMUSG00000034842 | + | chr5:92762008-92774138   | chr5:92762008-92817160                                               | ENSMUST00000135528                                                              | ENSMUST00000154245                                                                                                                                                                                                                                                                                                       |
| ALE | ENSMUSG00000036006 | + | chr13:24793599-24796639  | chr13:24793599-24797960                                              | ENSMUST00000132689,ENSMUST00000038477,<br>ENSMUST00000091694,ENSMUST00000102959 | ENSMUST00000110384,ENSMUST00000110383                                                                                                                                                                                                                                                                                    |
| ALE | ENSMUSG00000039021 | - | chr2:32618525-32620413   | chr2:32613088-32620413                                               | ENSMUST00000161430,ENSMUST00000161950,<br>ENSMUST00000066478,ENSMUST00000161089 | ENSMUST00000091059                                                                                                                                                                                                                                                                                                       |
| ALE | ENSMUSG00000039285 | + | chr9:117968293-117970832 | chr9:117968293-117968738/chr9:117968293-117978149                    | ENSMUST00000044454,ENSMUST00000133580,<br>ENSMUST00000135251,ENSMUST00000133814 | ENSMUST00000130735/ENSMUST00000154583                                                                                                                                                                                                                                                                                    |
| ALE | ENSMUSG00000040591 | - | chr2:91117291-91119347   | chr2:91119114-91119347                                               | ENSMUST00000064652,ENSMUST00000111344                                           | ENSMUST00000102594,ENSMUST00000094835                                                                                                                                                                                                                                                                                    |
| ALE | ENSMUSG00000040795 | - | chr4:129295606-129295736 | chr4:129295160-129295736                                             | ENSMUST00000121442                                                              | ENSMUST00000046675,ENSMUST00000131559                                                                                                                                                                                                                                                                                    |
| ALE | ENSMUSG00000041936 | - | chr4:155546531-155546671 | chr4:155540623-155546671                                             | ENSMUST00000075787,ENSMUST00000144749,<br>ENSMUST00000105574,ENSMUST00000105575 | ENSMUST00000071248                                                                                                                                                                                                                                                                                                       |
| ALE | ENSMUSG00000047921 | - | chr15:72631832-72733987  | chr15:72587788-72733987/chr15                                        | ENSMUST00000170633                                                              | ENSMUST00000089770,ENSMUST00000023276/                                                                                                                                                                                                                                                                                   |

|     |                    |   |                                                                                        |                                                                                                                  |                                                              |                                                                                                                           |
|-----|--------------------|---|----------------------------------------------------------------------------------------|------------------------------------------------------------------------------------------------------------------|--------------------------------------------------------------|---------------------------------------------------------------------------------------------------------------------------|
|     |                    |   |                                                                                        | :72682943-72733987                                                                                               |                                                              | ENSMUST00000168191                                                                                                        |
| ALE | ENSMUSG00000047921 | - | chr15:72587788-72733987                                                                | chr15:72631832-72733987/chr15:<br>:72682943-72733987                                                             | ENSMUST00000089770,ENSMUST00000023276                        | ENSMUST00000170633/ENSMUST00000168191                                                                                     |
| ALE | ENSMUSG00000052146 | - | chr17:27768200-27769224                                                                | chr17:27767451-27769224                                                                                          | ENSMUST00000114882,ENSMUST00000114881,<br>ENSMUST00000155071 | ENSMUST00000025052                                                                                                        |
| ALE | ENSMUSG00000054435 | + | chr6:48640456-48640841                                                                 | chr6:48640456-48641365                                                                                           | ENSMUST00000118802,ENSMUST00000121957,<br>ENSMUST00000114527 | ENSMUST00000119575                                                                                                        |
| ALE | ENSMUSG00000056121 | - | chr17:78778085-78780948                                                                | chr17:78771219-78780948                                                                                          | ENSMUST00000112487,ENSMUST00000070039                        | ENSMUST00000169193                                                                                                        |
| ALE | ENSMUSG00000061353 | + | chr6:117123596-117126104                                                               | chr6:117123596-117128601                                                                                         | ENSMUST00000073043                                           | ENSMUST00000112871                                                                                                        |
| ALE | ENSMUSG00000065979 | - | chr16:11885838-11887671                                                                | chr16:11828690-11887671                                                                                          | ENSMUST00000073371                                           | ENSMUST00000127972,ENSMUST00000096272,E<br>NSMUST00000145169                                                              |
| ALE | ENSMUSG00000074884 | + | chr2:121275819-121276457                                                               | chr2:121275819-121276324/chr2:<br>:121275819-121281312/chr2:121<br>275819-121276434/chr2:1212758<br>19-121282745 | ENSMUST00000139253                                           | ENSMUST00000110615/ENSMUST00000154418/<br>ENSMUST00000099475/ENSMUST00000148575                                           |
| ALE | ENSMUSG00000085362 | + | chr3:9404929-9434709                                                                   | chr3:9404929-9410931                                                                                             | ENSMUST00000146465                                           | ENSMUST00000136458                                                                                                        |
| ALE | ENSMUSG00000089844 | - | chr1:85081719-85086102                                                                 | chr1:85085391-85086102                                                                                           | ENSMUST00000161724                                           | ENSMUST00000160792                                                                                                        |
| ALE | ENSMUSG00000089847 | + | chr7:112789136-112789276                                                               | chr7:112789136-112789542                                                                                         | ENSMUST00000151193                                           | ENSMUST00000149819                                                                                                        |
| ALE | ENSMUSG00000090083 | + | chr17:29772967-29811084                                                                | chr17:29772967-29778161                                                                                          | ENSMUST00000130871                                           | ENSMUST00000024817,ENSMUST00000161242                                                                                     |
| CE  | ENSMUSG00000002885 | - | chr8:86254010-86254156;chr8:<br>86255802-86255936;chr8:8625<br>7313-86257465;          | chr8:86254010-86254156;chr8:8<br>6257313-86257465;                                                               | ENSMUST00000075843                                           | ENSMUST00000109802                                                                                                        |
| CE  | ENSMUSG00000018411 | + | chr11:104163675-104163724;c<br>hr11:104166526-104166723;ch<br>r11:104167940-104168072; | chr11:104163675-104163724;chr<br>11:104167940-104168072;                                                         | ENSMUST00000106988,ENSMUST00000106989                        | ENSMUST00000100347,ENSMUST00000106993,E<br>NSMUST00000106991,ENSMUST00000132977,E<br>NSMUST00000106992,ENSMUST00000106995 |
| CE  | ENSMUSG00000026193 | - | chr1:71648884-71649071;chr1:                                                           | chr1:71648884-71649071;chr1:7                                                                                    | ENSMUST00000097700,ENSMUST00000055226                        | ENSMUST00000087254                                                                                                        |

|     |                    |   |                                                                             |                                                    |                                       |                                                                                                                                                                            |
|-----|--------------------|---|-----------------------------------------------------------------------------|----------------------------------------------------|---------------------------------------|----------------------------------------------------------------------------------------------------------------------------------------------------------------------------|
|     |                    |   | 71650234-71650503;chr1:71651544-71651657;                                   | 1651544-71651657;                                  |                                       |                                                                                                                                                                            |
| CE  | ENSMUSG00000029144 | - | chr5:31475155-31475434;chr5:31475756-31475884;chr5:31476141-31476462;       | chr5:31475155-31475434;chr5:31476141-31476462;     | ENSMUST00000043161,ENSMUST00000163687 | ENSMUST00000088010,ENSMUST00000133520,ENSMUST00000101411,ENSMUST00000151370                                                                                                |
| CE  | ENSMUSG00000030605 | - | chr7:86287755-86287936;chr7:86288164-86288274;chr7:86290133-86290264;       | chr7:86287755-86287936;chr7:86290133-86290264;     | ENSMUST00000032825                    | ENSMUST00000107409                                                                                                                                                         |
| CE  | ENSMUSG00000032366 | - | chr9:66883802-66883935;chr9:66895593-66895718;chr9:66895931-66896056;       | chr9:66883802-66883935;chr9:66895931-66896056;     | ENSMUST00000034928                    | ENSMUST00000113701,ENSMUST00000113705                                                                                                                                      |
| CE  | ENSMUSG00000032966 | + | chr2:151368554-151368601;chr2:151369642-151369876;chr2:151383122-151383234; | chr2:151368554-151368601;chr2:151383122-151383234; | ENSMUST00000109880                    | ENSMUST00000044011,ENSMUST00000148295                                                                                                                                      |
| CE  | ENSMUSG00000032966 | + | chr2:151368554-151368601;chr2:151369749-151369876;chr2:151383122-151383234; | chr2:151368554-151368601;chr2:151383122-151383234; | ENSMUST00000137597,ENSMUST00000143230 | ENSMUST00000044011,ENSMUST00000148295                                                                                                                                      |
| CE  | ENSMUSG00000037266 | + | chr4:134481208-134481347;chr4:134481692-134481736;chr4:134482650-134482733; | chr4:134481208-134481347;chr4:134482650-134482733; | ENSMUST00000154837                    | ENSMUST00000078084                                                                                                                                                         |
| CE  | ENSMUSG00000049550 | - | chr5:124061831-124061947;chr5:124063077-124065344;chr5:124067345-124067560; | chr5:124061831-124061947;chr5:124067345-124067560; | ENSMUST00000154672                    | ENSMUST00000111552,ENSMUST00000137363,ENSMUST00000163515,ENSMUST00000171894,ENSMUST00000063905,ENSMUST00000111566,ENSMUST00000111564,ENSMUST00000111561,ENSMUST00000031382 |
| MXE | ENSMUSG00000015937 | - | chr13:56185557-56185646;chr                                                 | chr13:56185557-56185646;chr13                      | ENSMUST00000045788                    | ENSMUST00000016081                                                                                                                                                         |

|     |                     |   |                                                                                                                                          |                                                                                                      |                                       |                                                              |
|-----|---------------------|---|------------------------------------------------------------------------------------------------------------------------------------------|------------------------------------------------------------------------------------------------------|---------------------------------------|--------------------------------------------------------------|
|     |                     |   | 13:56189613-56189703;chr13:<br>56197485-56197595;                                                                                        | :56191119-56191218;chr13:5619<br>7485-56197595;                                                      |                                       |                                                              |
| MXE | ENSMUSG00000020149  | + | chr11:20115633-20115705;chr<br>11:20118816-20118911;chr11:<br>20124651-20125464;                                                         | chr11:20115633-20115705;chr11<br>:20124370-20124501;chr11:2012<br>4651-20125464;                     | ENSMUST00000109599                    | ENSMUST00000079816                                           |
| MXE | ENSMUSG00000020456  | + | chr11:6213791-6213982;chr11:<br>6216768-6216858;chr11:62345<br>36-6234651;                                                               | chr11:6213791-6213982;chr11:6<br>216981-6217083;chr11:6224881-<br>6224925;chr11:6234536-6234651<br>; | ENSMUST00000081894,ENSMUST00000109797 | ENSMUST00000165203                                           |
| MXE | ENSMUSG00000020456  | + | chr11:6213791-6213982;chr11:<br>6216768-6216858;chr11:62345<br>36-6234651;                                                               | chr11:6213791-6213982;chr11:6<br>216981-6217083;chr11:6234536-<br>6234651;                           | ENSMUST00000081894,ENSMUST00000109797 | ENSMUST00000003461,ENSMUST00000101555,E<br>NSMUST00000101554 |
| MXE | ENSMUSG000000021798 | - | chr14:35380584-35380753;chr<br>14:35382899-35382913;chr14:<br>35384904-35385107;chr14:353<br>86176-35386198;chr14:353917<br>81-35391856; | chr14:35380584-35380753;chr14<br>:35390172-35390530;chr14:3539<br>1781-35391856;                     | ENSMUST00000090040                    | ENSMUST00000022330,ENSMUST00000022327,E<br>NSMUST00000022328 |
| MXE | ENSMUSG000000021798 | - | chr14:35380584-35380753;chr<br>14:35384904-35385107;chr14:<br>35386176-35386198;chr14:353<br>91781-35391856;                             | chr14:35380584-35380753;chr14<br>:35390172-35390530;chr14:3539<br>1781-35391856;                     | ENSMUST00000064098                    | ENSMUST00000022330,ENSMUST00000022327,E<br>NSMUST00000022328 |
| MXE | ENSMUSG000000027620 | - | chr2:156003072-156003121;ch<br>r2:156003488-156003642;chr2<br>:156004913-156004976;                                                      | chr2:156003072-156003121;chr2<br>:156004616-156004688;chr2:156<br>004913-156004976;                  | ENSMUST00000154677                    | ENSMUST00000146549,ENSMUST00000155837,E<br>NSMUST00000137566 |
| MXE | ENSMUSG000000028464 | - | chr4:43531274-43531336;chr4:<br>43531516-43531591;chr4:4353                                                                              | chr4:43531274-43531336;chr4:4<br>3531875-43531950;chr4:4353209                                       | ENSMUST00000107913                    | ENSMUST00000030184,ENSMUST00000107914                        |



|     |                    |   |                                                                             |                                                                             |                                                                                                                                                                                               |                                                                                                                                                         |
|-----|--------------------|---|-----------------------------------------------------------------------------|-----------------------------------------------------------------------------|-----------------------------------------------------------------------------------------------------------------------------------------------------------------------------------------------|---------------------------------------------------------------------------------------------------------------------------------------------------------|
|     |                    |   | 2099-43532169;                                                              | 9-43532169;                                                                 |                                                                                                                                                                                               |                                                                                                                                                         |
| MXE | ENSMUSG00000029767 | + | chr6:29306471-29306697;chr6:29311294-29311487;chr6:29316040-29316206;       | chr6:29306471-29306697;chr6:29311560-29311753;chr6:29316040-29316206;       | ENSMUST00000031779                                                                                                                                                                            | ENSMUST00000090481                                                                                                                                      |
| MXE | ENSMUSG00000032294 | + | chr9:59519728-59519880;chr9:59522836-59523002;chr9:59525851-59526032;       | chr9:59519728-59519880;chr9:59523375-59523541;chr9:59525851-59526032;       | ENSMUST00000163694                                                                                                                                                                            | ENSMUST00000034834                                                                                                                                      |
| MXE | ENSMUSG00000032366 | - | chr9:66879259-66879321;chr9:66879758-66879833;chr9:66880601-66880671;       | chr9:66879259-66879321;chr9:66880273-66880348;chr9:66880601-66880671;       | ENSMUST00000113685,ENSMUST00000113686,ENSMUST00000113705,ENSMUST00000113690,ENSMUST00000030185,ENSMUST00000113695,ENSMUST00000113693,ENSMUST00000113687,ENSMUST00000034928,ENSMUST00000113707 | ENSMUST00000113701,ENSMUST00000113689,ENSMUST00000113696,ENSMUST00000129733,ENSMUST00000050905,ENSMUST00000113684,ENSMUST00000139046,ENSMUST00000113697 |
| MXE | ENSMUSG00000036452 | + | chr18:39466356-39466506;chr18:39517207-39517317;chr18:39522771-39522862;    | chr18:39466356-39466506;chr18:39517392-39517482;chr18:39522771-39522862;    | ENSMUST00000155576                                                                                                                                                                            | ENSMUST00000151757                                                                                                                                      |
| MXE | ENSMUSG00000054252 | + | chr5:34072793-34072983;chr5:34073930-34074080;chr5:34075371-34075561;       | chr5:34072793-34072983;chr5:34074766-34074910;chr5:34075371-34075561;       | ENSMUST00000114411                                                                                                                                                                            | ENSMUST00000087820,ENSMUST00000067150,ENSMUST00000164207,ENSMUST00000169212                                                                             |
| MXE | ENSMUSG00000061723 | + | chr7:149698437-149698527;chr7:149699570-149699610;chr7:149701681-149701735; | chr7:149698437-149698527;chr7:149700231-149700271;chr7:149701681-149701735; | ENSMUST00000105947,ENSMUST00000105946,ENSMUST00000105941,ENSMUST00000105943,ENSMUST00000105948                                                                                                | ENSMUST00000105944,ENSMUST00000105945,ENSMUST00000105942                                                                                                |
| MXE | ENSMUSG00000061904 | - | chr10:90582272-90582451;chr10:90584667-90584788;chr10:90586303-90586451;    | chr10:90582272-90582451;chr10:90584952-90585076;chr10:90586303-90586451;    | ENSMUST00000076694                                                                                                                                                                            | ENSMUST00000170810                                                                                                                                      |
| RI  | ENSMUSG00000000740 | + | chr8:125627798-125627854;chr8:125628944-125629144;                          | chr8:125627798-125629144;                                                   | ENSMUST00000000756                                                                                                                                                                            | ENSMUST00000129311                                                                                                                                      |

|    |                     |   |                                                                                                                                                                                                  |                            |                                                                                                        |                                       |
|----|---------------------|---|--------------------------------------------------------------------------------------------------------------------------------------------------------------------------------------------------|----------------------------|--------------------------------------------------------------------------------------------------------|---------------------------------------|
| RI | ENSMUSG00000001416  | + | chr3:88124936-88125067;chr3:<br>88125366-88125429;                                                                                                                                               | chr3:88124936-88125429;    | ENSMUST00000167000                                                                                     | ENSMUST00000168062,ENSMUST00000167718 |
| RI | ENSMUSG00000005481  | + | chr8:86245633-86245751;chr8:<br>86246129-86246260;                                                                                                                                               | chr8:86245633-86246260;    | ENSMUST00000140521,ENSMUST00000172396,<br>ENSMUST00000019576,ENSMUST00000109810,<br>ENSMUST00000116451 | ENSMUST00000127505                    |
| RI | ENSMUSG000000019822 | - | chr10:41207478-41207631;chr<br>10:41207799-41207903;chr10:<br>41207983-41208115;chr10:412<br>08239-41208321;chr10:412085<br>40-41209157;                                                         | chr10:41207478-41209157;   | ENSMUST00000141542                                                                                     | ENSMUST00000143470                    |
| RI | ENSMUSG000000019822 | - | chr10:41207983-41208115;chr<br>10:41208239-41208321;chr10:<br>41208540-41208629;chr10:412<br>08737-41208830;chr10:412090<br>81-41209157;                                                         | chr10:41207983-41209157;   | ENSMUST00000019965                                                                                     | ENSMUST00000126833                    |
| RI | ENSMUSG000000019822 | - | chr10:41207478-41207631;chr<br>10:41207799-41207903;chr10:<br>41207983-41208115;chr10:412<br>08239-41208321;chr10:412085<br>40-41208629;chr10:41208737-<br>41208830;chr10:41209081-412<br>09157; | chr10:41207478-41209157;   | ENSMUST00000019965                                                                                     | ENSMUST00000143470                    |
| RI | ENSMUSG000000023039 | + | chr15:101244400-101244611;c<br>hr15:101246652-101246712;                                                                                                                                         | chr15:101244400-101246712; | ENSMUST00000068904,ENSMUST00000147662                                                                  | ENSMUST00000131069                    |
| RI | ENSMUSG000000025512 | - | chr7:148708508-148708600;ch<br>r7:148712331-148712392;chr7                                                                                                                                       | chr7:148708508-148713604;  | ENSMUST00000026586,ENSMUST00000143561,<br>ENSMUST00000153191,ENSMUST00000118694,                       | ENSMUST00000147610                    |

|    |                    |   |                                                                                                                               |                           |                                                                                                |                    |
|----|--------------------|---|-------------------------------------------------------------------------------------------------------------------------------|---------------------------|------------------------------------------------------------------------------------------------|--------------------|
|    |                    |   | :148713498-148713604;                                                                                                         |                           | ENSMUST00000064642,ENSMUST00000166082                                                          |                    |
| RI | ENSMUSG00000027405 | + | chr2:130102172-130102359;chr2:130102443-130102594;chr2:130102768-130102868;chr2:130103212-130103360;chr2:130103585-130103706; | chr2:130102172-130103706; | ENSMUST00000103198                                                                             | ENSMUST00000161543 |
| RI | ENSMUSG00000028180 | + | chr3:157204664-157204833;chr3:157206122-157206208;                                                                            | chr3:157204664-157206208; | ENSMUST00000029831,ENSMUST00000136928,ENSMUST00000106057,ENSMUST00000106058,ENSMUST00000106063 | ENSMUST00000152882 |
| RI | ENSMUSG00000028245 | - | chr4:6345619-6345670;chr4:6347011-6347074;chr4:6347197-6347287;chr4:6348204-6348283;                                          | chr4:6345619-6348283;     | ENSMUST00000143566,ENSMUST00000164854,ENSMUST00000029910                                       | ENSMUST00000156078 |
| RI | ENSMUSG00000029017 | + | chr5:21249197-21249276;chr5:21251796-21251908;                                                                                | chr5:21249197-21251908;   | ENSMUST00000030882                                                                             | ENSMUST00000125693 |
| RI | ENSMUSG00000030272 | - | chr6:113288274-113288400;chr6:113289279-113289417;chr6:113289501-113289575;                                                   | chr6:113288274-113289575; | ENSMUST00000152736,ENSMUST00000155543,ENSMUST00000032409                                       | ENSMUST00000156512 |
| RI | ENSMUSG00000037266 | + | chr4:134481208-134481347;chr4:134482650-134482733;                                                                            | chr4:134481208-134482733; | ENSMUST00000078084                                                                             | ENSMUST00000148900 |
| RI | ENSMUSG00000042831 | + | chr7:31097256-31097407;chr7:31097610-31097726;                                                                                | chr7:31097256-31097726;   | ENSMUST00000136887,ENSMUST00000060834                                                          | ENSMUST00000132193 |
| RI | ENSMUSG00000047675 | - | chr4:116827613-116827712;chr4:116828176-116828282;                                                                            | chr4:116827613-116828282; | ENSMUST00000144051,ENSMUST00000102696                                                          | ENSMUST00000140226 |
| RI | ENSMUSG00000053332 | + | chr1:162966114-162966145;chr1:162966339-162966710;chr1                                                                        | chr1:162966114-162967446; | ENSMUST00000160429                                                                             | ENSMUST00000162163 |

|    |                    |   |                                                                                                                                                                                |                           |                                                                                                                                                                                               |                    |
|----|--------------------|---|--------------------------------------------------------------------------------------------------------------------------------------------------------------------------------|---------------------------|-----------------------------------------------------------------------------------------------------------------------------------------------------------------------------------------------|--------------------|
|    |                    |   | :162966951-162966983;chr1:162967419-162967446;                                                                                                                                 |                           |                                                                                                                                                                                               |                    |
| RI | ENSMUSG00000053332 | + | chr1:162965297-162965325;chr1:162965883-162965935;chr1:162966114-162966145;chr1:162966339-162966710;chr1:162966951-162966983;chr1:162967419-162967446;chr1:16296736-162967678; | chr1:162965297-162967678; | ENSMUST00000160429                                                                                                                                                                            | ENSMUST00000161229 |
| RI | ENSMUSG00000053332 | + | chr1:162966114-162966145;chr1:162966339-162966375;                                                                                                                             | chr1:162966114-162966375; | ENSMUST00000166523,ENSMUST00000159119,ENSMUST00000159404,ENSMUST00000159663,ENSMUST00000159706,ENSMUST00000161005,ENSMUST00000162558,ENSMUST00000160152,ENSMUST00000162289,ENSMUST00000161380 | ENSMUST00000159890 |
| RI | ENSMUSG00000053332 | + | chr1:162966114-162966145;chr1:162966339-162966375;chr1:162966680-162966710;chr1:162966951-162967295;chr1:162967419-162967446;                                                  | chr1:162966114-162967446; | ENSMUST00000161380                                                                                                                                                                            | ENSMUST00000162163 |
| RI | ENSMUSG00000053332 | + | chr1:162966114-162966145;chr1:162966339-162966375;chr1:162966680-162966710;chr1:162966951-162966983;chr1:162967419-162967446;                                                  | chr1:162966114-162967446; | ENSMUST00000159706,ENSMUST00000162289                                                                                                                                                         | ENSMUST00000162163 |
| RI | ENSMUSG00000053332 | + | chr1:162966114-162966145;chr1:162966339-162966710;chr1:162966951-162966983;chr1:162967419-162967446;                                                                           | chr1:162966114-162967446; | ENSMUST00000161461                                                                                                                                                                            | ENSMUST00000162163 |

|    |                    |   |                                                                                                                                                        |                           |                                                                             |                    |
|----|--------------------|---|--------------------------------------------------------------------------------------------------------------------------------------------------------|---------------------------|-----------------------------------------------------------------------------|--------------------|
|    |                    |   | :162966951-162966983;chr1:162967255-162967295;chr1:162967419-162967446;                                                                                |                           |                                                                             |                    |
| RI | ENSMUSG00000053332 | + | chr1:162966114-162966145;chr1:162966339-162966375;chr1:162966680-162966710;chr1:162966951-162966983;chr1:162967255-162967295;chr1:162967419-162967446; | chr1:162966114-162967446; | ENSMUST00000166523,ENSMUST00000162558                                       | ENSMUST00000162163 |
| RI | ENSMUSG00000053332 | + | chr1:162966114-162966145;chr1:162966339-162966375;chr1:162966680-162966710;chr1:162966951-162967446;                                                   | chr1:162966114-162967446; | ENSMUST00000160152                                                          | ENSMUST00000162163 |
| RI | ENSMUSG00000053841 | - | chr4:129308524-129308598;chr4:129308835-129308954;                                                                                                     | chr4:129308524-129308954; | ENSMUST00000046425,ENSMUST00000084264                                       | ENSMUST00000142577 |
| RI | ENSMUSG00000058600 | - | chr15:34370260-34370359;chr15:34370987-34371117;chr15:34372390-34372535;                                                                               | chr15:34370260-34372535;  | ENSMUST00000079735                                                          | ENSMUST00000135417 |
| RI | ENSMUSG00000062647 | + | chr2:26768191-26768321;chr2:26768508-26768577;                                                                                                         | chr2:26768191-26768577;   | ENSMUST00000164423,ENSMUST00000136269,ENSMUST00000143678,ENSMUST00000102898 | ENSMUST00000137376 |
| RI | ENSMUSG00000074578 | + | chr2:166890659-166890717;chr2:166890934-166890980;                                                                                                     | chr2:166890659-166890980; | ENSMUST00000125674                                                          | ENSMUST00000125841 |
| RI | ENSMUSG00000089989 | - | chr7:52387598-52387782;chr7:52389252-52389396;                                                                                                         | chr7:52387598-52389396;   | ENSMUST00000085377,ENSMUST00000123381,ENSMUST00000146760                    | ENSMUST00000134065 |

**Table S3. Differentially expressed genes after virus infection**

| Gene                | Symbol        | Fold change (log2) |               |             |              |
|---------------------|---------------|--------------------|---------------|-------------|--------------|
|                     |               | Jia6/10_CK_3d      | Jia6/10_CK_5d | LN/09_CK_3d | LN/09_CK_5d  |
| ENSMUSG00000037124  | Trim58        | -0.287609407       | -11.74747583  | -0.34178696 | -10.77011053 |
| ENSMUSG00000022491  | Glycam1       | -1.725805733       | -8.925211425  | -1.16014958 | -2.89467053  |
| ENSMUSG00000013418  | B4galnt2      | 0                  | -8.541111762  | 0           | -6.270642185 |
| ENSMUSG00000027849  | Syt6          | 0.250445924        | -7.149621301  | 0.863308649 | -6.8691291   |
| ENSMUSG00000031710  | Ucp1          | -3.935005873       | -5.785891572  | -4.05872688 | -4.778944169 |
| ENSMUSG00000071858  | Gm94          | -1.616652737       | -5.641462821  | -1.12909513 | -0.145774485 |
| ENSMUSG00000074181  | -             | -2.527503658       | -5.511725877  | -0.33821478 | -2.40824863  |
| ENSMUSG00000035686  | Thrsp         | -4.31207046        | -5.183824543  | -1.88675443 | -2.771907387 |
| ENSMUSG00000054422  | Fabp1         | -4.011877336       | -5.098340254  | -2.2223221  | -3.352501772 |
| ENSMUSG00000074183  | Gsta1         | -1.304494639       | -4.861825372  | -0.51477285 | -2.841397486 |
| ENSMUSG00000051596  | Otop1         | -4.156303111       | -4.815696392  | -1.88702336 | -3.830995188 |
| ENSMUSG00000030244  | Gys2          | -4.282459659       | -4.808567942  | -2.62199835 | -2.078017481 |
| ENSMUSG00000038801  | Scgb1c1       | -3.095090755       | -4.803550127  | -0.64432479 | -2.890455576 |
| ENSMUSG00000032310  | Cyp1a2        | -5.29896692        | -4.765926357  | -1.58741554 | -1.268584105 |
| ENSMUSG00000006269  | Atp6v1b1      | -4.375064101       | -4.625592231  | -3.7986345  | -4.197101509 |
| ENSMUSG000000085128 | -             | -1.701344288       | -4.619144536  | -1.12261539 | -2.353318346 |
| ENSMUSG00000057933  | Gsta2         | -1.806272156       | -4.58312763   | -0.82279928 | -2.989461072 |
| ENSMUSG00000040972  | Igsf21        | -3.931074221       | -4.569161785  | -1.30677166 | -4.630743906 |
| ENSMUSG00000090887  | -             | -1.030146213       | -4.568071311  | -0.11711948 | -0.801161987 |
| ENSMUSG00000004892  | Bcan          | -4.01276648        | -4.550782052  | -0.73073278 | -2.004256526 |
| ENSMUSG00000084775  | Gm16741       | -0.251084016       | -4.518376293  | 0.170736806 | -3.881941296 |
| ENSMUSG00000038791  | Scgb3a2       | -3.58688471        | -4.463052449  | -1.73472593 | -2.701525263 |
| ENSMUSG00000025431  | Crisp1        | -1.838165337       | -4.424841669  | -0.52649284 | -0.14921212  |
| ENSMUSG00000046748  | 2310005G13Rik | -0.874859651       | -4.335078941  | -0.25374021 | -0.01411231  |
| ENSMUSG00000071047  | Ces1a         | -2.460466911       | -4.321584503  | -2.05121957 | -1.363323414 |
| ENSMUSG00000078597  | Cyp4a12b      | -1.859550414       | -4.296094011  | -3.14615554 | -0.976424375 |
| ENSMUSG00000030664  | 1110006G14Rik | -1.292057699       | -4.285122357  | -0.95660243 | -4.224647611 |
| ENSMUSG00000020884  | Asgr1         | -1.650199316       | -4.24422716   | -3.92762599 | -2.691957525 |
| ENSMUSG00000069372  | Ctxn3         | -1.242812194       | -4.068172583  | -0.47941548 | -0.796630676 |
| ENSMUSG00000002588  | Pon1          | -3.681439203       | -4.040733802  | -1.56965842 | -3.219034658 |
| ENSMUSG00000064294  | Aox3          | -3.122357516       | -4.037899906  | -1.73869759 | -2.488221117 |
| ENSMUSG00000056078  | Lipm          | -0.972327417       | -3.988977501  | 0.107771333 | 0.052451321  |
| ENSMUSG00000059201  | Lep           | -3.581793438       | -3.969446307  | -2.44511027 | -3.673882179 |
| ENSMUSG00000074179  | Gm10639       | -1.762113128       | -3.968477433  | -0.33820426 | -4.324866012 |
| ENSMUSG00000043687  | 1190005I06Rik | -1.696441172       | -3.914352676  | -0.89740451 | -3.120471422 |
| ENSMUSG00000026621  | Mosc1         | -5.624312213       | -3.884002981  | -1.55190972 | -1.927112346 |
| ENSMUSG00000019102  | Aldh3a1       | -1.635253817       | -3.880457484  | -0.64789018 | -0.237811965 |
| ENSMUSG00000083425  | Gm13992       | 0                  | -3.873939908  | 0.576233812 | -3.840421214 |
| ENSMUSG00000005547  | Cyp2a5        | -2.506710308       | -3.861859284  | -2.0700418  | -2.08694177  |
| ENSMUSG00000042031  | Lce3b         | -1.257312267       | -3.853934278  | -0.52301599 | -0.024588744 |
| ENSMUSG00000024653  | Scgb1a1       | -1.356121991       | -3.825662217  | 0           | -1.356121991 |
| ENSMUSG00000026459  | Myog          | -1.204737501       | -3.824062377  | -1.24965827 | -1.072535877 |
| ENSMUSG00000059898  | Dsc3          | -0.636423312       | -3.821188964  | -0.36587298 | 0.284113948  |

|                    |               |              |              |             |              |
|--------------------|---------------|--------------|--------------|-------------|--------------|
| ENSMUSG00000031844 | Hsd17b2       | -0.997114387 | -3.7852752   | -1.56284863 | -1.646201588 |
| ENSMUSG00000091971 | Hspa1a        | -0.465321464 | -3.784270251 | 0.915002906 | -0.983517056 |
| ENSMUSG00000090877 | Hspa1b        | -0.458449487 | -3.777538078 | 0.939686837 | -0.954163148 |
| ENSMUSG00000066071 | Cyp4a12a      | -1.925838046 | -3.773240516 | -3.35354714 | -0.817399613 |
| ENSMUSG00000026691 | Fmo3          | -3.441648297 | -3.770566484 | -2.29213101 | -2.933906739 |
| ENSMUSG00000032315 | Cyp1a1        | -4.349778503 | -3.760697744 | -0.94217974 | -3.658408098 |
| ENSMUSG00000030302 | Atp2b2        | -2.876898195 | -3.75711125  | -0.76818735 | -2.6270256   |
| ENSMUSG00000044338 | Aplnr         | -2.345253621 | -3.752106512 | -1.07095022 | -1.898894904 |
| ENSMUSG00000060343 | Calm5         | -1.270802485 | -3.74682105  | -0.35215716 | -1.105837089 |
| ENSMUSG00000064057 | Scgb3a1       | -3.5724546   | -3.745681812 | -3.73775707 | -3.018695922 |
| ENSMUSG0000004885  | Crabp2        | -1.168154902 | -3.741174004 | -0.111364   | 0.603110507  |
| ENSMUSG00000027401 | Tgm3          | -1.464167292 | -3.725474914 | -0.55712839 | 0.019504019  |
| ENSMUSG00000041984 | Rptn          | -1.561773619 | -3.703779046 | -0.68303585 | 0.071779817  |
| ENSMUSG00000048455 | Sprr1b        | -0.112747322 | -3.695978094 | 0.480417344 | -0.220758478 |
| ENSMUSG00000045475 | Lce3c         | -1.215164224 | -3.694956628 | -0.29506249 | 0.0622306    |
| ENSMUSG00000033765 | Calm4         | -1.537931224 | -3.694402807 | -0.82425621 | -0.199465685 |
| ENSMUSG00000027923 | Lce1b         | -1.584566389 | -3.694208477 | -0.2062237  | -0.173804439 |
| ENSMUSG00000054325 | Lce3a         | -1.143867138 | -3.694158418 | -0.38400203 | -0.11125737  |
| ENSMUSG00000005355 | Casp14        | -0.899580479 | -3.682707505 | -0.40602388 | -0.42335282  |
| ENSMUSG00000092004 | Gm17482       | -2.063941207 | -3.679164783 | 0.055265694 | -2.648323535 |
| ENSMUSG00000018776 | Amac1         | -0.805913872 | -3.650263385 | -0.97796314 | -1.847383232 |
| ENSMUSG00000068885 | Lce3f         | -1.200717759 | -3.638119229 | -0.21477806 | 0.056741983  |
| ENSMUSG00000043681 | Fam25c        | -1.262836111 | -3.618880113 | -0.18552443 | 0.069934405  |
| ENSMUSG00000083314 | Gm11742       | 1.813882917  | -3.615226169 | 1.064235552 | -1.026420052 |
| ENSMUSG00000074254 | Cyp2a4        | -2.412635966 | -3.602417259 | -2.09843936 | -1.943783289 |
| ENSMUSG00000043122 | A530016L24Rik | -4.380698941 | -3.591051371 | -2.03559788 | -2.250707903 |
| ENSMUSG00000033208 | S100b         | -1.153128794 | -3.583433032 | -0.64950083 | -1.031221802 |
| ENSMUSG00000020052 | Ascl1         | -2.137131672 | -3.568973722 | -1.86466127 | -3.534600353 |
| ENSMUSG00000052974 | Cyp2f2        | -3.085517184 | -3.560505987 | -1.60312815 | -2.309642445 |
| ENSMUSG00000026304 | Rab17         | -3.160006035 | -3.542404686 | -3.88454843 | -1.977100206 |
| ENSMUSG00000001494 | Sost          | -3.100006624 | -3.53064087  | -3.24980028 | -3.201821764 |
| ENSMUSG00000026983 | Il1f5         | -1.062509491 | -3.516340294 | -0.74437554 | -0.119665658 |
| ENSMUSG00000034774 | Dsg1c         | -0.82226572  | -3.505459344 | -0.55886161 | 0.317824933  |
| ENSMUSG00000027483 | Bpifa1        | -3.108980108 | -3.500078188 | -3.68336966 | -2.917877026 |
| ENSMUSG00000082969 | Gm12630       | 0.803429995  | -3.495021172 | 0.444179432 | -1.908421148 |
| ENSMUSG00000059668 | Krt4          | -1.381051368 | -3.49060403  | -0.36291652 | 0            |
| ENSMUSG00000063651 | Cnfn          | -1.098443612 | -3.483928025 | 0.111771193 | 0.126255392  |
| ENSMUSG00000031757 | Mt4           | -1.667515933 | -3.471093876 | -0.3359134  | 0.048902613  |
| ENSMUSG00000037973 | Ccdc129       | -3.284984527 | -3.449271546 | -1.73573947 | -2.304745404 |
| ENSMUSG00000041523 | Upk2          | -4.324261761 | -3.447962121 | -0.96102161 | -2.42192604  |
| ENSMUSG00000083618 | Gm11771       | -2.332398698 | -3.444961554 | -1.17994004 | -1.957511641 |
| ENSMUSG00000046095 | Krt32         | -0.96913284  | -3.412103415 | -0.63538834 | 1.037098632  |
| ENSMUSG00000083826 | Gm13039       | 1.033348144  | -3.410075193 | -1.48456869 | -2.426474022 |
| ENSMUSG00000061397 | Krt79         | -1.298730578 | -3.405808317 | -0.24973604 | -1.827237891 |
| ENSMUSG00000027559 | Car3          | -3.187778995 | -3.399938537 | -1.72881622 | -2.432295039 |
| ENSMUSG00000059956 | Serpib12      | -1.370140366 | -3.39442296  | -0.60001265 | -0.100347868 |
| ENSMUSG00000031494 | Cd209a        | -2.533592867 | -3.390472583 | -1.36272269 | -0.014025339 |
| ENSMUSG00000054013 | Tmem179       | -4.307105302 | -3.383465904 | -1.60289517 | -1.922931965 |

|                    |               |              |              |             |              |
|--------------------|---------------|--------------|--------------|-------------|--------------|
| ENSMUSG00000067063 | Gm6990        | -3.343753095 | -3.375289392 | -2.80434531 | -1.344121242 |
| ENSMUSG00000074433 | 2310001H18Rik | -1.147151196 | -3.366534198 | -0.43284931 | 0.203723372  |
| ENSMUSG00000083991 | Gm11618       | -1.398876859 | -3.360844488 | -1.48238278 | -1.021159739 |
| ENSMUSG00000051906 | Cd209f        | -2.201783669 | -3.3486846   | -0.63895842 | -1.143826937 |
| ENSMUSG00000090944 | -             | -0.405999992 | -3.336779514 | 1.387036282 | -0.563168642 |
| ENSMUSG00000061959 | Ces1e         | -1.926561277 | -3.336594081 | -1.64808534 | -2.317632004 |
| ENSMUSG00000073415 | Gm10501       | -0.505191959 | -3.32969745  | 0.734292714 | -0.92461189  |
| ENSMUSG00000074156 | Ces1h         | -1.388135004 | -3.32555803  | -0.69999245 | 0.097449524  |
| ENSMUSG00000043472 | Gm9782        | -1.145810653 | -3.324569694 | 0.036003728 | 0.23409711   |
| ENSMUSG00000041991 | Hnr           | -1.542398645 | -3.317517261 | -0.89376184 | 0.165240264  |
| ENSMUSG00000045539 | Spr3          | -1.182551128 | -3.312753193 | -0.17568293 | 0.116234856  |
| ENSMUSG00000007033 | Hspa11        | -0.50373007  | -3.28803962  | 0.734760687 | -0.919355168 |
| ENSMUSG00000049598 | Vsig8         | -0.939428061 | -3.267240186 | 0.208376828 | -0.019099501 |
| ENSMUSG00000059412 | Fxyd2         | -3.882020324 | -3.264612119 | -0.70652631 | -4.208168062 |
| ENSMUSG00000059741 | Myl3          | -1.512152876 | -3.248249232 | -0.59131441 | -2.216213026 |
| ENSMUSG00000037071 | Scd1          | -2.729739224 | -3.24502215  | -1.00961272 | -1.545972146 |
| ENSMUSG00000023019 | Gpd1          | -2.549663111 | -3.243905127 | -1.58373517 | -2.416829753 |
| ENSMUSG00000057609 | Lce1a1        | -1.39015391  | -3.226352415 | -0.2912742  | -0.177441425 |
| ENSMUSG00000074199 | Krtdap        | -0.934821105 | -3.219442292 | -0.15241209 | -0.041214925 |
| ENSMUSG00000040165 | Cd209c        | -1.987225333 | -3.200835203 | 0.211513018 | -1.763312701 |
| ENSMUSG00000034783 | Cd207         | -3.350482264 | -3.199567142 | -1.42208112 | -2.049392205 |
| ENSMUSG00000091712 | Sec14l5       | -2.781485191 | -3.196150848 | -0.70009041 | -1.186913342 |
| ENSMUSG00000027913 | Crc1          | -1.318275717 | -3.185047117 | -0.48658813 | 0.060440347  |
| ENSMUSG00000078658 | Lce1d         | -1.546927384 | -3.182415058 | -0.18041597 | -0.206297501 |
| ENSMUSG00000039114 | Nrn1          | -1.752420912 | -3.178573712 | -0.74517784 | -1.764013699 |
| ENSMUSG00000056978 | Hamp2         | -3.278085982 | -3.167396732 | -1.70380438 | -4.689041914 |
| ENSMUSG00000092070 | -             | -0.487940765 | -3.167178999 | -1.94979589 | -0.355450592 |
| ENSMUSG00000044041 | Krt13         | -1.338423222 | -3.164780285 | -0.49150134 | 0.038848944  |
| ENSMUSG00000041616 | Nppa          | -2.950786525 | -3.162968159 | -0.92296643 | -1.422233137 |
| ENSMUSG00000023011 | Faim2         | -1.906173426 | -3.162958305 | -0.37421754 | -2.023769466 |
| ENSMUSG00000022996 | Wnt10b        | -2.591080141 | -3.162776597 | -0.73092113 | -1.685039503 |
| ENSMUSG00000017697 | Ada           | -1.114818104 | -3.159913154 | -0.44660796 | 0.00823615   |
| ENSMUSG00000036655 | Colec11       | -1.488498906 | -3.137068376 | -0.63714143 | -1.339054627 |
| ENSMUSG00000090356 | 2310042E22Rik | -1.077756784 | -3.134317717 | -0.53791841 | 0.191997396  |
| ENSMUSG00000040127 | Sdr9c7        | -0.765522874 | -3.124025753 | -0.705244   | -0.251363106 |
| ENSMUSG00000043165 | Lor           | -0.867906944 | -3.110733164 | 0.348382467 | -0.251824138 |
| ENSMUSG00000059832 | Kprp          | -1.051039979 | -3.104216234 | 0.033411709 | -0.022098316 |
| ENSMUSG00000032807 | Alox12b       | -1.121426891 | -3.099602728 | -0.24865716 | 0.296834369  |
| ENSMUSG00000031881 | Cdh16         | -2.229218102 | -3.090538235 | -0.39918244 | -1.169927941 |
| ENSMUSG00000000889 | Dbh           | -0.064690158 | -3.086592068 | -1.24671019 | -3.729665848 |
| ENSMUSG00000087183 | -             | -3.640989038 | -3.079523666 | -2.77627981 | -5.031739318 |
| ENSMUSG00000072473 | 1700024G13Rik | -2.236383341 | -3.074467257 | -1.33837666 | -1.781396653 |
| ENSMUSG00000057606 | Colq          | -2.498857691 | -3.06251364  | -0.85201588 | -1.428266454 |
| ENSMUSG00000078100 | -             | -0.852210445 | -3.049790523 | -0.61149775 | -0.048891199 |
| ENSMUSG00000042379 | Esm1          | -2.426180843 | -3.039490294 | -1.58148206 | -2.106877244 |
| ENSMUSG00000020096 | Tbata         | -2.647236213 | -3.035917801 | -1.97169771 | -3.373644638 |
| ENSMUSG00000075605 | 2300005B03Rik | -1.315710456 | -3.027124788 | -1.02239013 | -0.337714315 |
| ENSMUSG00000058022 | Adtrp         | -0.749293505 | -3.025260263 | -0.52108366 | -1.072384293 |



|                    |               |              |              |             |              |
|--------------------|---------------|--------------|--------------|-------------|--------------|
| ENSMUSG00000068887 | Lce1j         | -1.680328118 | -3.022790611 | -0.80880021 | 0.558043107  |
| ENSMUSG00000028427 | Aqp7          | -2.485741039 | -3.014794643 | -1.76994719 | -3.156115188 |
| ENSMUSG00000030747 | Dgat2         | -2.396507224 | -3.008877589 | -1.43695543 | -1.791404389 |
| ENSMUSG00000055775 | Myh8          | -1.365164461 | -3.005084802 | -0.600074   | -0.487168192 |
| ENSMUSG00000068890 | Lce1a2        | -1.344436995 | -2.989126704 | -0.11249264 | 0.277198058  |
| ENSMUSG00000051431 | Gpr87         | -0.819690131 | -2.981576885 | -0.91485282 | 0.026285576  |
| ENSMUSG00000086678 | -             | -0.7170269   | -2.969399578 | -0.11842961 | -0.058506765 |
| ENSMUSG00000040808 | S100g         | -3.103804105 | -2.965542636 | -1.1676512  | -2.795878473 |
| ENSMUSG00000042200 | Cdrt4         | 0.150412836  | -2.961263998 | -0.84052126 | -2.920237241 |
| ENSMUSG00000025175 | Fn3k          | -1.781374219 | -2.949655564 | -1.30639318 | -1.72939531  |
| ENSMUSG00000083216 | Hbb-bh3       | -2.825829594 | -2.943049502 | -0.7105822  | -1.286008228 |
| ENSMUSG00000064225 | Paqr9         | -4.269405584 | -2.940491634 | -1.63169302 | -3.024883865 |
| ENSMUSG00000059631 | 1500035N22Rik | -1.021159883 | -2.939511828 | -0.96276756 | -1.865867995 |
| ENSMUSG00000079355 | Ccr11         | -2.470282241 | -2.939151354 | -1.37537862 | -3.999408967 |
| ENSMUSG00000079602 | 9230102O04Rik | 0.153390299  | -2.938114834 | 0.650816936 | -1.569383248 |
| ENSMUSG00000069441 | Dsg1a         | -0.955758317 | -2.928236729 | -0.40004713 | 0.342450165  |
| ENSMUSG00000050463 | Krt78         | -1.298443795 | -2.923107711 | -0.38367479 | 0.011247337  |
| ENSMUSG00000062515 | Fabp4         | -3.014030186 | -2.917999322 | -1.54305698 | -2.679302633 |
| ENSMUSG00000072800 | -             | -1.80584914  | -2.913805987 | -0.81957729 | -1.231038912 |
| ENSMUSG00000029695 | Aass          | -1.907159469 | -2.906619684 | -1.03048052 | -1.8006868   |
| ENSMUSG00000083967 | Gm15115       | -2.814174113 | -2.906450922 | -0.68534731 | -1.251774191 |
| ENSMUSG00000030554 | Synm          | -1.805021676 | -2.897312052 | -0.74194583 | -1.631156252 |
| ENSMUSG00000027912 | Lce1m         | -1.5778703   | -2.89580252  | -0.44211911 | 0.430132437  |
| ENSMUSG00000059230 | Defb4         | -1.334901128 | -2.892878246 | -0.2293512  | -0.366455116 |
| ENSMUSG00000068889 | Lce1e         | -2.015292146 | -2.892832166 | -0.46521717 | -0.321029828 |
| ENSMUSG00000036731 | 2310002J15Rik | -1.291742654 | -2.885392153 | -0.33270408 | -0.270541877 |
| ENSMUSG00000040412 | 5330417C22Rik | -2.095605399 | -2.882782719 | -1.07015222 | -1.735923659 |
| ENSMUSG00000046676 | Lce1l         | -1.381162727 | -2.875275542 | -0.61758109 | -0.33166483  |
| ENSMUSG00000025783 | 4930412O13Rik | 0.036257015  | -2.875191155 | 1.404809798 | -0.914236138 |
| ENSMUSG00000063130 | Calml3        | -1.274754791 | -2.864733723 | -0.70290156 | 0.128016296  |
| ENSMUSG00000068323 | Slc4a5        | -2.137721784 | -2.861339611 | -0.60456093 | -1.548441837 |
| ENSMUSG00000062778 | Chia          | -2.125660737 | -2.855748254 | -0.84610823 | -1.69959537  |
| ENSMUSG00000029361 | Nos1          | -1.257717086 | -2.855451561 | -0.43635041 | -0.526258137 |
| ENSMUSG00000059824 | Dbp           | -0.460951976 | -2.848961564 | -0.71829346 | -0.92980356  |
| ENSMUSG00000075425 | Gm13547       | -1.017634992 | -2.843710054 | -0.14602059 | -0.647129617 |
| ENSMUSG00000082364 | Gm11955       | -1.856536396 | -2.84164755  | -0.46379943 | 0.159298617  |
| ENSMUSG00000005705 | Agrp          | -0.982472232 | -2.836718906 | -0.130412   | -0.821866219 |
| ENSMUSG00000025153 | Fasn          | -2.349743313 | -2.834273765 | -0.91881363 | -1.576330436 |
| ENSMUSG00000089932 | Gm16114       | 0.596217894  | -2.831586836 | 1.735739995 | -1.659294383 |
| ENSMUSG00000074218 | Cox7a1        | -3.31215037  | -2.831354167 | -1.70644668 | -1.552908692 |
| ENSMUSG00000075217 | 4833423E24Rik | -0.70810695  | -2.826961948 | -0.90261344 | 0.39735255   |
| ENSMUSG00000047586 | Nccrpl        | -0.36423282  | -2.801256785 | 0.318956938 | 0.28611728   |
| ENSMUSG00000015354 | Pcolce2       | -1.998805859 | -2.800976493 | -0.57362876 | -3.336385011 |
| ENSMUSG00000024028 | Tff2          | -1.146406992 | -2.795325163 | -1.5542234  | -1.963949164 |
| ENSMUSG00000037577 | Ephx3         | -0.342841979 | -2.789514691 | -0.10571939 | -0.066535414 |
| ENSMUSG00000039070 | Cpa4          | -1.027064927 | -2.786456331 | -0.27552812 | 0.408834129  |
| ENSMUSG00000080907 | 4930455H04Rik | 0.314047135  | -2.780881679 | -0.14002006 | -1.499961742 |
| ENSMUSG00000060579 | Fhit          | -1.338146265 | -2.755772766 | -1.03925983 | -0.763401171 |

|                    |               |              |              |             |              |
|--------------------|---------------|--------------|--------------|-------------|--------------|
| ENSMUSG00000025150 | Cbr2          | -2.449720239 | -2.746890743 | -1.04463071 | -1.436956464 |
| ENSMUSG00000024027 | Glp1r         | -2.588938182 | -2.7458861   | -1.56922363 | -2.026244689 |
| ENSMUSG00000044594 | Serpib3a      | -1.264364334 | -2.742291566 | -0.59121724 | -0.156000382 |
| ENSMUSG00000024039 | Cbs           | -1.339106582 | -2.739119198 | -1.38702481 | -1.892079397 |
| ENSMUSG00000046814 | Gchfr         | -2.127481872 | -2.733877979 | -0.85432336 | -2.140024376 |
| ENSMUSG00000084893 | Hba-ps4       | -2.372332947 | -2.726527589 | -0.56680775 | -0.816689721 |
| ENSMUSG00000039269 | 2300002M23Rik | -0.697751545 | -2.724515227 | -0.08950195 | 0.493725557  |
| ENSMUSG00000064018 | -             | -1.356312866 | -2.718038597 | -0.47951027 | -0.895518269 |
| ENSMUSG00000048004 | Tmem196       | -1.439366876 | -2.711459177 | -2.92822021 | -0.712602395 |
| ENSMUSG00000060621 | Nkpd1         | -1.162734935 | -2.707124274 | -0.02812694 | 0.532387862  |
| ENSMUSG00000019894 | Slc6a15       | -3.900624453 | -2.704492564 | -1.55432043 | -3.079893841 |
| ENSMUSG00000044086 | Lmod3         | -2.002590348 | -2.70380087  | -1.68180134 | -0.085034151 |
| ENSMUSG00000042124 | Lce1f         | -1.748353458 | -2.69825867  | -0.3398401  | -0.112785042 |
| ENSMUSG00000053522 | Lgals7        | -1.457462799 | -2.69232351  | -0.1266986  | 0.015366856  |
| ENSMUSG00000042092 | Lce1c         | -1.657822193 | -2.688853909 | -0.30757775 | -0.245632596 |
| ENSMUSG00000027796 | Smad9         | -2.284870382 | -2.688092503 | -1.11372961 | -1.804355462 |
| ENSMUSG00000031780 | Ccl17         | -0.399070947 | -2.686671837 | 0.316721953 | -0.517285591 |
| ENSMUSG00000038572 | Bpifb5        | -1.756646443 | -2.683296859 | 0.100276555 | -1.665308227 |
| ENSMUSG00000080729 | Gm8084        | -1.349893282 | -2.67789476  | -0.85644004 | -0.73771086  |
| ENSMUSG00000033508 | Asprv1        | -1.185890397 | -2.67631733  | -0.42629723 | -0.046376373 |
| ENSMUSG00000073602 | Serpib3b      | -1.143965058 | -2.666909681 | -0.22999766 | -0.596482145 |
| ENSMUSG00000079168 | Cd209g        | -3.405378752 | -2.665052794 | -0.29600113 | -0.442141164 |
| ENSMUSG00000045776 | Lrtm1         | -2.102562299 | -2.661795966 | -0.72007203 | -0.940725476 |
| ENSMUSG00000040488 | Ltbp4         | -1.795805152 | -2.661538853 | -0.25675818 | -1.374640395 |
| ENSMUSG00000044322 | Dsc1          | -1.002772838 | -2.648522328 | -0.60981763 | 0.339600483  |
| ENSMUSG00000023461 | -             | -1.08854862  | -2.647795902 | -0.34714067 | -1.988555512 |
| ENSMUSG00000027380 | Acox1         | -1.792915879 | -2.646342876 | -0.67705155 | -1.155389177 |
| ENSMUSG00000036523 | Greb1         | -0.938883816 | -2.645712026 | -0.18145971 | -1.607964119 |
| ENSMUSG00000054196 | Cthrc1        | -0.203576831 | -2.642832025 | -0.63523283 | -1.223754487 |
| ENSMUSG00000022496 | Tnfrsf17      | -1.546264904 | -2.631889264 | -1.63524126 | -1.257842863 |
| ENSMUSG00000084038 | Gm11295       | -2.040046694 | -2.627783565 | -1.72501435 | -0.987585132 |
| ENSMUSG00000018566 | Slc2a4        | -3.191984815 | -2.621951607 | -1.77998928 | -1.34164671  |
| ENSMUSG00000080993 | Gm12903       | 0.655190054  | -2.621023282 | 1.20448661  | -1.007306057 |
| ENSMUSG00000055609 | Hba-x         | -2.484183399 | -2.620630793 | -0.2495955  | -0.922784512 |
| ENSMUSG00000078898 | Gm4723        | -1.233275223 | -2.607374156 | 0.19596124  | -0.161183215 |
| ENSMUSG00000026874 | Hc            | -1.821603755 | -2.602363641 | -0.36144446 | -0.89064147  |
| ENSMUSG00000024500 | Ppp2r2b       | -2.095783724 | -2.593850345 | -0.6556492  | -1.1612302   |
| ENSMUSG00000029499 | Pxmp2         | -1.973071055 | -2.593778096 | -1.27323432 | -1.657359857 |
| ENSMUSG00000011632 | Pinlyp        | -0.712544074 | -2.592651043 | -0.55033711 | 0.827393011  |
| ENSMUSG00000085700 | Hbb-bh0       | -4.246035584 | -2.58663986  | -1.51476696 | -0.847543451 |
| ENSMUSG00000013091 | Tmem190       | -0.810951402 | -2.585397407 | -0.93816077 | 0.204251605  |
| ENSMUSG00000034768 | Asb16         | -1.654020685 | -2.584671853 | -0.822272   | -0.896279627 |
| ENSMUSG00000047182 | Irs3          | -1.661431662 | -2.583226911 | -0.91400797 | -1.317714919 |
| ENSMUSG00000020427 | Igfbp3        | -2.638265553 | -2.578570451 | -1.12895308 | -2.443322992 |
| ENSMUSG00000024990 | Rbp4          | -2.135867901 | -2.565287316 | -0.96467836 | -1.955210745 |
| ENSMUSG00000005373 | Mlxipl        | -3.119974045 | -2.561693783 | -1.08781234 | -1.419401895 |
| ENSMUSG00000047884 | Klk9          | -0.545458968 | -2.559364974 | 0.421529496 | 0.067280169  |
| ENSMUSG00000057074 | Ces1g         | -1.972059289 | -2.557949897 | -1.18164831 | -1.812288196 |

|                    |               |              |              |             |              |
|--------------------|---------------|--------------|--------------|-------------|--------------|
| ENSMUSG00000015852 | Fcrfs         | -2.54879017  | -2.557492706 | -0.63696458 | -1.412185897 |
| ENSMUSG00000020722 | Cacng1        | -0.593090988 | -2.545586415 | -0.34774715 | -0.03513304  |
| ENSMUSG00000031927 | 1700012B09Rik | -0.410441075 | -2.535729202 | -0.09761098 | -3.068033045 |
| ENSMUSG00000043496 | Tril          | -1.866452594 | -2.529823366 | -0.96554003 | -2.233890355 |
| ENSMUSG00000031489 | Adrb3         | -2.49725605  | -2.524448127 | -1.02214028 | -2.481116664 |
| ENSMUSG00000068492 | -             | -0.767412382 | -2.523309085 | -0.21172871 | -0.299489559 |
| ENSMUSG00000032262 | Elov14        | -1.045660416 | -2.516441412 | -0.1629635  | -1.389496421 |
| ENSMUSG00000024534 | Sncaip        | -0.658398771 | -2.510160764 | -1.0686186  | -1.404460099 |
| ENSMUSG00000053214 | Gm9899        | -0.599143521 | -2.510088141 | -0.28657387 | -1.67879974  |
| ENSMUSG00000028148 | Them5         | -0.682955292 | -2.509519541 | -0.3226357  | 0.104109708  |
| ENSMUSG00000012187 | Mogat1        | -2.207050654 | -2.500209074 | -1.65999099 | -3.363281127 |
| ENSMUSG00000078447 | -             | 0.113074212  | -2.499092348 | 0.245062698 | -2.032964622 |
| ENSMUSG00000071470 | Ccnb1ip1      | -0.148375135 | -2.497890377 | -0.80576022 | 1.864444935  |
| ENSMUSG00000058135 | Gstm1         | -1.968422448 | -2.496228351 | -0.71399658 | -1.846987809 |
| ENSMUSG00000017914 | BC034902      | -2.276975125 | -2.49424976  | -2.22500378 | -1.553226738 |
| ENSMUSG00000035486 | Plk5          | -2.927301808 | -2.493541066 | -1.38119649 | -1.333032281 |
| ENSMUSG00000082160 | Gm11578       | 0.453674173  | -2.49286664  | -0.92748844 | -3.441874479 |
| ENSMUSG00000026413 | Pkp1          | -1.189573255 | -2.488161748 | -0.37462595 | -0.000416927 |
| ENSMUSG00000021055 | Esr2          | -0.916045637 | -2.487982692 | -0.19964799 | -1.432705595 |
| ENSMUSG00000033578 | Tmem35        | -1.692276935 | -2.487651823 | -1.27980722 | -3.78108067  |
| ENSMUSG00000090826 | -             | -1.245974831 | -2.486391829 | -0.54156132 | -2.382636649 |
| ENSMUSG00000027224 | Duoxa1        | -0.633203358 | -2.485909619 | -0.4555273  | 0.008181154  |
| ENSMUSG00000045036 | Tmem232       | -0.934911799 | -2.484233718 | -0.94301522 | -0.935752885 |
| ENSMUSG00000046056 | Sbsn          | -1.264025872 | -2.480981865 | -0.25810398 | -0.218673307 |
| ENSMUSG00000061928 | Dsg1b         | -0.888304924 | -2.480642748 | -0.20248098 | 0.341348565  |
| ENSMUSG00000028996 | Rbp7          | -3.251554117 | -2.479081334 | -0.86801216 | -1.607949904 |
| ENSMUSG00000055561 | Spink5        | -0.972803814 | -2.477057106 | -0.58033183 | 0.251404518  |
| ENSMUSG00000022759 | 4930451C15Rik | -2.195934448 | -2.475273444 | -1.44978772 | -1.701382809 |
| ENSMUSG00000090870 | -             | -1.685162448 | -2.47170044  | -1.62986558 | -2.413120072 |
| ENSMUSG00000067006 | Serpinb5      | -1.175902438 | -2.459216636 | -0.13226613 | 0.29096961   |
| ENSMUSG00000090309 | -             | -0.037500796 | -2.458058536 | -0.44269211 | -2.090276803 |
| ENSMUSG00000044359 | P2ry4         | -0.944338663 | -2.455815373 | -0.68185006 | -2.089369352 |
| ENSMUSG00000078866 | Gm14420       | -0.021229997 | -2.455723039 | 1.124143875 | -0.712282359 |
| ENSMUSG00000020123 | Avpr1a        | -2.246179307 | -2.455223115 | -1.8137647  | -0.510208699 |
| ENSMUSG00000050762 | Prss27        | -1.447734889 | -2.45488959  | -0.6588488  | -0.123124284 |
| ENSMUSG00000091089 | A930018M24Rik | -1.937118965 | -2.450835714 | -0.79256402 | -0.926186588 |
| ENSMUSG00000038065 | 2410066E13Rik | -2.399901386 | -2.450022786 | -0.74439822 | -1.749105362 |
| ENSMUSG00000030546 | Plin1         | -2.864857459 | -2.44894064  | -1.65860168 | -2.229379427 |
| ENSMUSG00000030433 | Sbk2          | -1.574098911 | -2.4452926   | -0.7646723  | -0.540298453 |
| ENSMUSG00000044405 | Adig          | -2.463379963 | -2.435540395 | -1.90316036 | -1.904162218 |
| ENSMUSG00000079434 | Neu2          | -1.424067619 | -2.430346933 | -0.78178071 | -0.826251487 |
| ENSMUSG00000024526 | Cidea         | -1.997412456 | -2.427904833 | -1.55622846 | -2.397960794 |
| ENSMUSG00000084189 | Gm8089        | -1.531450704 | -2.420275218 | -0.62629586 | -0.325994887 |
| ENSMUSG00000049593 | Lce1h         | -1.612562487 | -2.41999751  | -0.55579443 | 0.086119719  |
| ENSMUSG00000041559 | Fmod          | -2.201909686 | -2.415812589 | -0.94003933 | -1.021698342 |
| ENSMUSG00000033327 | Tnxb          | -1.108698932 | -2.412462953 | 0.013307801 | -1.244219102 |
| ENSMUSG00000067879 | 3110035E14Rik | -0.256635705 | -2.409428119 | 0.714749582 | -1.507078324 |
| ENSMUSG00000026327 | Serpinb11     | -0.805961263 | -2.408759116 | -0.33854215 | -0.043881937 |

|                    |               |              |              |             |              |
|--------------------|---------------|--------------|--------------|-------------|--------------|
| ENSMUSG00000031725 | Ces1f         | -2.064371505 | -2.407273214 | -1.62749973 | -2.40645963  |
| ENSMUSG00000086213 | A330040F15Rik | -0.532598651 | -2.406193594 | -0.76899576 | -3.895233221 |
| ENSMUSG00000050195 | Scd4          | -2.300890361 | -2.40491746  | -0.9680574  | -1.134278298 |
| ENSMUSG00000006457 | Actn3         | -1.45926618  | -2.39888805  | -1.16192006 | -0.353123112 |
| ENSMUSG00000090221 | -             | -1.085599534 | -2.395688607 | 0.495408439 | -0.225528945 |
| ENSMUSG00000022878 | Adipoq        | -2.743536058 | -2.384403931 | -1.6552115  | -2.427749905 |
| ENSMUSG00000039518 | Cdsn          | -0.788585931 | -2.383135398 | -0.09399489 | 0.19251761   |
| ENSMUSG00000023046 | Igfbp6        | -1.989701973 | -2.381273012 | -0.61620767 | -1.731083698 |
| ENSMUSG00000060899 | Rpl21-ps11    | -5.475643255 | -2.38120773  | -5.94243391 | -2.799313366 |
| ENSMUSG00000019326 | Aoc3          | -1.791570269 | -2.380710458 | -1.07531988 | -1.668569157 |
| ENSMUSG00000075402 | Krt76         | -1.654247976 | -2.379855094 | -1.03789742 | 0.156458892  |
| ENSMUSG00000083771 | Gm15988       | 0.558531097  | -2.378388432 | 1.453674475 | -1.17635469  |
| ENSMUSG00000025488 | Cox8b         | -2.893886428 | -2.378154574 | -1.83903231 | -1.815601582 |
| ENSMUSG00000089756 | Gm8898        | -1.196115783 | -2.377870731 | 0.353482701 | -0.162285313 |
| ENSMUSG00000049357 | 4933408B17Rik | -0.632131141 | -2.376435858 | 0.670217803 | -1.131127586 |
| ENSMUSG00000037686 | Aspg          | -1.785602576 | -2.374905058 | -0.64408564 | -1.513667955 |
| ENSMUSG00000062826 | Ces2f         | -1.009339117 | -2.371595679 | 0.150026902 | 0.032410112  |
| ENSMUSG00000078621 | Hbb-bh2       | -3.309112874 | -2.371191627 | -1.45921548 | -1.062549288 |
| ENSMUSG00000074491 | Clec4g        | -0.91840995  | -2.370742364 | -0.96379914 | -1.028090214 |
| ENSMUSG00000053957 | Gm12474       | -1.343822569 | -2.364969072 | -0.86097224 | -3.109754276 |
| ENSMUSG00000030048 | Gkn3          | -1.568761783 | -2.363386975 | -1.44105656 | -1.683676401 |
| ENSMUSG00000037624 | Kcnk2         | -1.391282075 | -2.35803103  | -0.64436185 | -1.526661138 |
| ENSMUSG00000038457 | Fam70b        | -2.536702443 | -2.356962036 | -0.98773119 | -0.707689047 |
| ENSMUSG00000073063 | Hbq1b         | -2.625736764 | -2.355339361 | -0.1063993  | -0.837424977 |
| ENSMUSG00000017204 | Gsdma         | -0.935783736 | -2.355186447 | -0.21817971 | 0.246288051  |
| ENSMUSG00000073672 | Rnf223        | -0.615335327 | -2.354299766 | 0.109571475 | 0.424467897  |
| ENSMUSG00000079993 | Gm11799       | -2.153112312 | -2.353915554 | -0.36543561 | -1.162393885 |
| ENSMUSG00000028573 | Fggy          | 0.310084408  | -2.353696705 | -0.63754875 | -1.643539028 |
| ENSMUSG00000020524 | Gria1         | -2.057663978 | -2.349663579 | -0.6791153  | -2.075369462 |
| ENSMUSG00000084129 | Hmgb1-ps1     | 1.300252241  | -2.347884638 | 0.069529192 | -1.306137365 |
| ENSMUSG00000020183 | Cpm           | -1.843123668 | -2.343622399 | -1.11651646 | -1.476074389 |
| ENSMUSG00000087272 | Gm15409       | -2.325551852 | -2.34215891  | -0.18263508 | -0.739606041 |
| ENSMUSG00000082795 | Gm13193       | 0.987155275  | -2.341546023 | -1.97372347 | -1.330592262 |
| ENSMUSG00000025202 | Scd3          | -2.263442883 | -2.340976928 | -0.96490689 | -1.18212911  |
| ENSMUSG00000052217 | Hbb-bh1       | -3.2804261   | -2.337778258 | -1.43155208 | -1.041032774 |
| ENSMUSG00000074264 | Amy1          | -2.114828147 | -2.33644353  | -1.66405718 | -1.647901795 |
| ENSMUSG00000030972 | Acsm5         | -4.650402803 | -2.333849978 | -2.29292242 | -2.287086637 |
| ENSMUSG00000027513 | Pck1          | -2.08308577  | -2.332370078 | -1.68371556 | -3.191971378 |
| ENSMUSG00000041220 | Elov16        | -2.610051405 | -2.332323003 | -1.51962261 | -1.203971685 |
| ENSMUSG00000055632 | Hmcn2         | -1.918381761 | -2.331323847 | -0.57606916 | -0.425475406 |
| ENSMUSG00000048142 | Nat8l         | -2.439853206 | -2.327243891 | -1.15652855 | -2.005529651 |
| ENSMUSG00000033615 | Cplx1         | 0.303079491  | -2.322518966 | -0.10396982 | -0.867457633 |
| ENSMUSG00000054850 | Ncrna00086    | -1.722781723 | -2.321756854 | -0.57275618 | -2.51217222  |
| ENSMUSG00000090903 | -             | -0.934393458 | -2.320333075 | -1.67681404 | -1.98849123  |
| ENSMUSG00000057454 | Lypd3         | -0.958923219 | -2.317067694 | -0.38097876 | -0.038308037 |
| ENSMUSG00000020623 | Map2k6        | -1.465066964 | -2.316174417 | -1.13864921 | -1.147044745 |
| ENSMUSG00000068083 | Cyp2d40       | 0.825298456  | -2.314979937 | 0.568118137 | -0.501422296 |
| ENSMUSG00000045238 | A730035I17Rik | -1.151911339 | -2.314868433 | -0.40905901 | -2.896208044 |

|                    |               |              |              |             |              |
|--------------------|---------------|--------------|--------------|-------------|--------------|
| ENSMUSG00000014846 | Tppp3         | -2.091356283 | -2.311765767 | -0.99002256 | -1.405423607 |
| ENSMUSG00000061527 | Krt5          | -1.590965405 | -2.306710955 | 0.029481734 | -0.039715033 |
| ENSMUSG00000090879 | -             | -0.242123178 | -2.304735565 | 1.107766    | -1.299731274 |
| ENSMUSG00000023013 | Aqp2          | -0.031087095 | -2.303975733 | 0.76274601  | -1.622824423 |
| ENSMUSG00000015405 | Ace2          | -1.087094103 | -2.30102456  | -0.56171483 | -2.364889817 |
| ENSMUSG00000049173 | Myoz3         | -2.628603375 | -2.29855611  | -0.19657681 | 0.441748562  |
| ENSMUSG00000050296 | Abca12        | -0.847031687 | -2.296650252 | -0.43364784 | -0.163115921 |
| ENSMUSG00000032649 | Glt25d2       | -1.776433859 | -2.288892467 | -0.78152901 | -1.636937805 |
| ENSMUSG00000086389 | Gm15998       | -1.049992573 | -2.288214413 | -0.14329049 | -0.364303032 |
| ENSMUSG00000003949 | Hlf           | -0.764736408 | -2.283277411 | -0.50084922 | -1.457016648 |
| ENSMUSG00000020251 | Glt8d2        | -0.729348924 | -2.281632867 | -0.25886979 | -2.023492475 |
| ENSMUSG00000032908 | Sgpp2         | -1.217582713 | -2.273689079 | -0.13748918 | -0.796018333 |
| ENSMUSG00000071551 | Akr1c19       | -0.491461163 | -2.27284327  | -0.79914554 | -1.164218772 |
| ENSMUSG00000038216 | Pnmt          | 0.728028235  | -2.271205562 | -1.06277782 | -0.823548253 |
| ENSMUSG00000044951 | Mylk4         | -2.24404538  | -2.269451061 | -1.03337229 | -0.531041519 |
| ENSMUSG00000047797 | Gjb1          | -1.113057415 | -2.268284335 | -0.14213036 | -1.880587844 |
| ENSMUSG00000021573 | Tppp          | -2.414073265 | -2.263372832 | -1.06501396 | -1.674968844 |
| ENSMUSG00000020532 | Acaca         | -2.364435982 | -2.257085408 | -1.22981154 | -1.599733191 |
| ENSMUSG00000031204 | Asb12         | -1.273837939 | -2.255726347 | -1.18735781 | -0.704176728 |
| ENSMUSG00000037129 | Tmprss13      | -0.89250946  | -2.255722096 | -0.25248905 | -1.545947909 |
| ENSMUSG00000082152 | Gm13655       | 0.187313046  | -2.254970074 | -6.83258569 | -2.207453862 |
| ENSMUSG00000002769 | Gnmt          | -3.297479478 | -2.253109407 | -0.64555324 | -1.516431529 |
| ENSMUSG00000068522 | Aard          | -1.2315018   | -2.252215898 | -0.26486132 | -1.542005579 |
| ENSMUSG00000051456 | Hspb3         | -1.926227195 | -2.249249683 | -3.81007535 | 0.026739441  |
| ENSMUSG00000072966 | Gprasp2       | -1.012490006 | -2.249064648 | -0.07569496 | -2.424417724 |
| ENSMUSG00000030865 | 2010110P09Rik | -2.238995852 | -2.248192882 | -0.93953196 | -1.22559751  |
| ENSMUSG00000040694 | Apobec2       | -2.553028762 | -2.2474035   | -1.18136236 | 0.034853102  |
| ENSMUSG00000030606 | Hapln3        | -0.505749701 | -2.238586333 | -0.48501153 | -1.27625635  |
| ENSMUSG00000029205 | Chrna9        | -2.018931408 | -2.237935108 | -1.35564989 | -1.681461964 |
| ENSMUSG00000046415 | B430212C06Rik | -0.478577875 | -2.235593178 | -0.365581   | -1.563578838 |
| ENSMUSG00000032291 | Crabp1        | -1.252373687 | -2.234946742 | -0.86490005 | -1.031112841 |
| ENSMUSG00000075390 | Rpl36-ps8     | -1.741036794 | -2.23398392  | 1.091721015 | -1.96315316  |
| ENSMUSG00000033595 | Lgi3          | -1.601741028 | -2.226835151 | -0.41479034 | -1.301302398 |
| ENSMUSG00000091578 | -             | -1.934296866 | -2.225903647 | -0.72651718 | -1.619646939 |
| ENSMUSG00000073601 | Serpib3c      | -1.446684637 | -2.224739682 | -0.78817349 | -1.127248811 |
| ENSMUSG00000091939 | -             | -2.833810276 | -2.223160025 | -0.634708   | -1.117394377 |
| ENSMUSG00000031147 | Magix         | -1.874688079 | -2.221148487 | -1.38985307 | -3.386340046 |
| ENSMUSG00000062713 | Sim2          | -0.650155115 | -2.219428633 | -0.20424019 | 0.327736571  |
| ENSMUSG00000001865 | Cpa3          | -0.761909595 | -2.214328822 | -1.25118416 | -1.748658626 |
| ENSMUSG00000007122 | Casq1         | -2.65675893  | -2.213839562 | -1.2660329  | -0.113833042 |
| ENSMUSG00000046550 | Spin2         | -0.000934951 | -2.213298932 | -0.91529575 | -3.0762783   |
| ENSMUSG00000090066 | 1110002E22Rik | -1.764653189 | -2.211673467 | -1.24702796 | -0.375182908 |
| ENSMUSG00000020469 | Myl7          | -2.511510703 | -2.211323088 | -0.7666951  | -1.813025327 |
| ENSMUSG00000039013 | Siglec5       | -0.693609409 | -2.211229102 | -0.58504297 | -1.217383402 |
| ENSMUSG00000090314 | 2310050C09Rik | -1.62219846  | -2.206225861 | -0.0619187  | 0.407706464  |
| ENSMUSG00000091169 | -             | -0.563593175 | -2.205045934 | -1.02713464 | -1.261851494 |
| ENSMUSG00000061086 | Myl4          | -2.766197397 | -2.203048916 | -0.6663096  | -1.398623589 |
| ENSMUSG00000048399 | Tprg          | -1.03715553  | -2.202575941 | 0.192117775 | 0.157201041  |

|                    |               |              |              |             |              |
|--------------------|---------------|--------------|--------------|-------------|--------------|
| ENSMUSG00000020811 | Wscd1         | -1.569231727 | -2.201281472 | -0.62740054 | -1.751675728 |
| ENSMUSG00000058017 | Serpib3d      | -1.106004201 | -2.199115158 | -0.68563435 | -0.201772026 |
| ENSMUSG00000021319 | Sfrp4         | -0.522911765 | -2.199096842 | 0.955452533 | 0.011261184  |
| ENSMUSG00000025270 | Alas2         | -2.20380458  | -2.198903758 | -0.34214431 | -2.206066441 |
| ENSMUSG00000026301 | Iqca          | -1.758503586 | -2.197878661 | -1.11363038 | -1.169588536 |
| ENSMUSG00000078861 | Zfp931        | 0.013394376  | -2.19624989  | 1.450254901 | -0.314932877 |
| ENSMUSG00000022871 | Fetub         | -0.692848047 | -2.195432543 | -0.15731333 | 0.055442288  |
| ENSMUSG00000004038 | Gstm3         | -2.078245072 | -2.19374035  | -0.59033544 | -1.615092977 |
| ENSMUSG00000008153 | Clstn3        | -1.965868476 | -2.193629754 | -0.83630807 | -1.553905473 |
| ENSMUSG00000058260 | Serpina9      | -0.766181339 | -2.192045545 | 0.467643001 | 0.180854552  |
| ENSMUSG00000029120 | Ppp2r2c       | -1.693788235 | -2.191573363 | -0.15985284 | 0.040204874  |
| ENSMUSG00000080937 | Gm13510       | -0.516621212 | -2.188996368 | -0.93013138 | -1.173577392 |
| ENSMUSG00000073413 | Ly6g6d        | -0.838967908 | -2.188651109 | -0.5110984  | -0.340115016 |
| ENSMUSG00000003477 | Inmt          | -1.764593447 | -2.183816235 | -0.74988524 | -1.686511811 |
| ENSMUSG00000032500 | Dclk3         | -1.433929502 | -2.182787989 | -0.25841414 | -3.010283488 |
| ENSMUSG00000055980 | Irs1          | -1.700785519 | -2.182044373 | -0.52695495 | -1.303517019 |
| ENSMUSG00000040055 | Gjb6          | -1.022977824 | -2.181219764 | -0.3325262  | -0.270168821 |
| ENSMUSG00000031312 | Itgb1bp2      | -1.917528803 | -2.175538437 | -0.81088264 | -1.931554655 |
| ENSMUSG00000029153 | Ociad2        | -1.421849727 | -2.173594523 | -0.77842102 | -1.302793957 |
| ENSMUSG00000036813 | Entpd8        | -2.323912888 | -2.172210088 | -0.56949828 | -1.407255108 |
| ENSMUSG00000090490 | -             | -1.72323883  | -2.166292947 | -0.99973867 | 0.115829314  |
| ENSMUSG00000038776 | Ephx1         | -1.692414268 | -2.165919563 | -0.85063219 | -1.546311523 |
| ENSMUSG00000030607 | Acan          | 0.001246399  | -2.163990419 | 0.128830749 | 0.76259168   |
| ENSMUSG00000028036 | Ptgfr         | -0.515673758 | -2.160662876 | -0.51720061 | -1.13533001  |
| ENSMUSG00000086015 | 4833417C18Rik | -0.930098866 | -2.160234954 | -0.49879821 | -0.129698696 |
| ENSMUSG00000026961 | Lrrc26        | -2.999344229 | -2.158231002 | -1.53687055 | -0.922576491 |
| ENSMUSG00000044156 | Hepacam2      | -2.368419075 | -2.157752886 | -1.00614506 | -1.004368954 |
| ENSMUSG00000050097 | Ces2b         | -1.324058557 | -2.155175886 | -0.13042179 | -1.617631238 |
| ENSMUSG00000064201 | Krt2          | -2.489031073 | -2.154987859 | -1.60875049 | 0.489095826  |
| ENSMUSG00000073940 | Hbb-b2        | -1.996823219 | -2.15243985  | 0           | 0.152720908  |
| ENSMUSG00000082513 | Gm15374       | -0.369279429 | -2.152043789 | -0.16038981 | -1.878928669 |
| ENSMUSG00000084088 | Gm12941       | 0.708399083  | -2.14377624  | 0.198961612 | -0.551440488 |
| ENSMUSG00000056632 | Dsg3          | -0.433307582 | -2.143216777 | 0.201913515 | 0.168819036  |
| ENSMUSG00000017309 | Cd300lg       | -1.855961084 | -2.142305993 | -0.93026845 | -1.567823917 |
| ENSMUSG00000046093 | Hpcal4        | -1.996276464 | -2.140207902 | -0.41932343 | -1.640564528 |
| ENSMUSG00000035459 | Stab2         | -0.32342481  | -2.140011738 | -0.07850326 | -1.629972049 |
| ENSMUSG00000031972 | Acta1         | -1.96933128  | -2.139135005 | -1.18033833 | -1.838392439 |
| ENSMUSG00000037188 | Grhl3         | -1.181013144 | -2.138017302 | -0.371285   | -0.199780745 |
| ENSMUSG00000051113 | Fam71e1       | -1.019334399 | -2.135896344 | -0.60906105 | -1.461329679 |
| ENSMUSG00000078252 | Krtap17-1     | -2.227056656 | -2.124103268 | -0.95458239 | -3.3372679   |
| ENSMUSG00000047227 | Gm527         | -0.386102138 | -2.1210111   | 0.119240344 | -0.663371533 |
| ENSMUSG00000032454 | Rbp2          | -0.870433318 | -2.117517352 | -0.47284127 | -1.170180656 |
| ENSMUSG00000079319 | -             | -0.599143521 | -2.115506071 | 0.636350977 | -1.023377666 |
| ENSMUSG00000049349 | Gm5105        | -1.30716041  | -2.113621347 | -1.96356237 | 0.017448414  |
| ENSMUSG00000031886 | Ces2e         | -1.651617241 | -2.112856808 | -0.18119106 | -1.016456384 |
| ENSMUSG00000078169 | Gm16499       | -1.343504356 | -2.112180246 | -1.12428564 | -2.993178457 |
| ENSMUSG00000034810 | Scn7a         | -0.887131094 | -2.110689393 | -0.50477011 | -1.494312383 |
| ENSMUSG00000075307 | Kbtbd10       | -1.395284699 | -2.108086823 | -1.0646387  | -0.455580156 |

|                    |               |              |              |             |              |
|--------------------|---------------|--------------|--------------|-------------|--------------|
| ENSMUSG00000039004 | Bmp6          | -1.594888631 | -2.106689292 | -0.76848037 | -1.599303685 |
| ENSMUSG00000090891 | D6Ertd527e    | -2.370715991 | -2.104312479 | -0.79556102 | -1.527336502 |
| ENSMUSG00000070570 | Slc17a7       | -2.196587891 | -2.104299941 | 0.124053258 | -0.976406425 |
| ENSMUSG00000073424 | Cyp4f15       | -1.618236973 | -2.103553954 | -0.63449884 | -0.99413524  |
| ENSMUSG00000081602 | Gm15369       | -0.766191691 | -2.100699045 | -0.20773163 | -1.703597874 |
| ENSMUSG00000030278 | Cidec         | -2.648477906 | -2.098993836 | -1.16456189 | -2.233713281 |
| ENSMUSG00000033763 | Mtss11        | -1.366720874 | -2.098861822 | -0.24552713 | -1.470505632 |
| ENSMUSG00000022206 | Npr3          | -1.620492209 | -2.091929237 | -0.36846871 | -1.153447262 |
| ENSMUSG00000024892 | Pcx           | -2.242082876 | -2.090814198 | -0.89035183 | -1.024536785 |
| ENSMUSG00000052305 | Hbb-b1        | -1.649683296 | -2.090570623 | 0           | -0.152720908 |
| ENSMUSG00000022546 | Gpt           | -1.755104667 | -2.086726383 | -0.87541558 | -1.254931541 |
| ENSMUSG00000012705 | Retn          | -3.673708087 | -2.085647404 | -1.074304   | -1.673502037 |
| ENSMUSG00000033805 | Ephx4         | -0.068248645 | -2.082978218 | 0.158256809 | -0.962001558 |
| ENSMUSG00000061068 | Mcpt4         | -1.925624874 | -2.081969268 | -0.62855199 | -1.193821942 |
| ENSMUSG00000021506 | Pitx1         | -1.242221338 | -2.081937815 | -0.14315238 | 0.473713128  |
| ENSMUSG00000054619 | Mettl7a1      | -1.796993511 | -2.081469129 | -0.82797324 | -1.617006037 |
| ENSMUSG00000040794 | C1qtnf4       | -0.218833815 | -2.080775732 | -0.66783994 | -1.469284435 |
| ENSMUSG00000052450 | 2810055G20Rik | -0.245863538 | -2.079438922 | -0.61712758 | -2.87376298  |
| ENSMUSG00000086663 | -             | -1.443246919 | -2.077279674 | -0.05943013 | -0.92753432  |
| ENSMUSG00000029193 | Cckar         | -1.969825351 | -2.076276878 | -0.85958245 | -0.98139271  |
| ENSMUSG00000022591 | Gm9747        | -1.811313446 | -2.075483052 | -0.61123871 | -1.779561041 |
| ENSMUSG00000020566 | Atp6v1c2      | -0.963553009 | -2.074779603 | -0.37416908 | -1.070763082 |
| ENSMUSG00000021032 | Ngb           | -1.627597702 | -2.074125885 | 0.174669727 | -1.274903638 |
| ENSMUSG00000066108 | Muc5b         | -0.46855757  | -2.073233663 | -0.0525886  | -0.749091817 |
| ENSMUSG00000071019 | Sdr16c6       | -1.23901889  | -2.07194865  | -0.42837633 | -1.268015868 |
| ENSMUSG00000006777 | Krt23         | -1.131507474 | -2.070453791 | -0.81915006 | -0.880990154 |
| ENSMUSG00000078964 | Ces1b         | -1.196367233 | -2.069835555 | -0.94419414 | -0.873812215 |
| ENSMUSG00000068888 | Lce1i         | -1.640937622 | -2.067110652 | -0.52130531 | 0.061847185  |
| ENSMUSG00000063661 | Krt73         | -0.817584892 | -2.065447747 | 0.09047204  | 0.506677987  |
| ENSMUSG00000027376 | Prom2         | -1.048390104 | -2.063697218 | -0.07165372 | -0.594236945 |
| ENSMUSG00000060180 | Myh13         | -1.691265864 | -2.061242634 | -0.89269835 | -0.149307986 |
| ENSMUSG00000026824 | Kcnj3         | -2.120517461 | -2.061153095 | -1.28375557 | -1.485321433 |
| ENSMUSG00000040181 | Fmo1          | -1.481335251 | -2.059787039 | -0.94338375 | -1.850418971 |
| ENSMUSG00000030713 | Klk7          | -0.298218267 | -2.056239079 | 0.013097533 | 0.29905945   |
| ENSMUSG00000023336 | Wfdc1         | -1.372752241 | -2.055676314 | -0.34530127 | -2.474191464 |
| ENSMUSG00000020889 | Nr1d1         | -0.926876671 | -2.054923559 | -0.82234594 | -0.532724217 |
| ENSMUSG00000061259 | Tmprss11d     | -0.594339629 | -2.053549403 | 0.798029853 | 1.117863458  |
| ENSMUSG00000056605 | Krt72-ps      | -0.816513066 | -2.050212197 | 0.136808102 | 0.503905629  |
| ENSMUSG00000085069 | Gm13111       | -1.127254436 | -2.047630564 | -0.46225414 | -1.1103265   |
| ENSMUSG00000001300 | Efnb2         | -1.38949722  | -2.044927327 | -0.73554865 | -1.503351869 |
| ENSMUSG00000000903 | Vpreb3        | -1.157768381 | -2.044239868 | -1.0894138  | -1.325595419 |
| ENSMUSG00000091922 | Gm17409       | 1.086792779  | -2.041635615 | 0.533033552 | -0.144843962 |
| ENSMUSG00000023328 | Ache          | -1.102193443 | -2.041563896 | 0.434995273 | -0.198006575 |
| ENSMUSG00000054514 | 2610204G22Rik | -0.924252071 | -2.040812045 | -1.67274715 | -0.291240773 |
| ENSMUSG00000060962 | Dmkn          | -1.055925438 | -2.040711728 | -0.20755659 | -0.005254484 |
| ENSMUSG00000031877 | Ces2g         | -1.170649576 | -2.040556822 | -0.25266181 | -0.822743083 |
| ENSMUSG00000025889 | Snea          | -2.096605529 | -2.038216021 | -0.50125655 | -0.596352979 |
| ENSMUSG00000058669 | Nkx2-9        | 0.454142188  | -2.037932841 | 0.521290573 | -1.189938747 |

|                    |               |              |              |             |              |
|--------------------|---------------|--------------|--------------|-------------|--------------|
| ENSMUSG00000026668 | Ucma          | 1.228351953  | -2.037139109 | 1.295291622 | -0.210918847 |
| ENSMUSG00000047216 | Cdh19         | -0.843304731 | -2.036205349 | 0.227328844 | -1.463421933 |
| ENSMUSG00000054622 | D730045B01Rik | -1.425040293 | -2.034202179 | -2.75342754 | -0.428823803 |
| ENSMUSG00000073465 | Park2         | 1.187203499  | -2.034202179 | 1.855068346 | -1.13447725  |
| ENSMUSG00000091141 | -             | -1.817140232 | -2.03246059  | 1.42700981  | -1.036145116 |
| ENSMUSG00000057182 | Scn3a         | -1.321135585 | -2.031766434 | -0.51595348 | -1.019312332 |
| ENSMUSG00000046916 | Myct1         | -1.733345431 | -2.030697485 | -1.04163314 | -1.522734996 |
| ENSMUSG00000044287 | Nrn1l         | -0.250028733 | -2.028782047 | 0.768132507 | -0.13971423  |
| ENSMUSG00000029669 | Tspan12       | -1.637227887 | -2.02863306  | -0.64776305 | -1.497948969 |
| ENSMUSG00000020182 | Ddc           | -0.424617131 | -2.026872265 | -1.09472774 | -1.626913515 |
| ENSMUSG00000067951 | Vmn1r227      | 0            | -2.025131587 | 0           | -2.025131587 |
| ENSMUSG00000091305 | Gm17100       | 0.748443629  | -2.022425167 | -0.36865716 | -1.964729814 |
| ENSMUSG00000026984 | Ilf6          | -1.376320664 | -2.01993883  | -0.69296652 | 0.149796594  |
| ENSMUSG00000030693 | Klk10         | -0.160361238 | -2.017678517 | 0.072303831 | 0.516967046  |
| ENSMUSG00000042451 | Mybph         | -1.592464321 | -2.015489171 | -0.63059849 | -0.13767415  |
| ENSMUSG00000024972 | Lgals12       | -2.278572856 | -2.013002653 | -0.9001218  | -1.320655578 |
| ENSMUSG00000035458 | Tnni3         | -1.561785779 | -2.012261172 | -0.63487606 | -1.279500417 |
| ENSMUSG00000062196 | -             | -0.967684912 | -2.011616874 | -0.2968384  | -0.223741289 |
| ENSMUSG00000026532 | Spna1         | -1.999059055 | -2.010741099 | -0.24762661 | -1.050696153 |
| ENSMUSG00000027919 | Lcelg         | -1.621227485 | -2.009514298 | -0.49803461 | 0.684510277  |
| ENSMUSG00000035606 | Ky            | -1.47529092  | -2.005924987 | -1.70721943 | -1.935070438 |
| ENSMUSG00000087573 | -             | -1.205313775 | -2.005719206 | -0.73057547 | -1.544497381 |
| ENSMUSG00000027820 | Mme           | -1.220780163 | -2.005580518 | -0.62995092 | -1.427967814 |
| ENSMUSG00000032172 | Olfm2         | -2.277573665 | -2.001261417 | -1.31266388 | -3.980623769 |
| ENSMUSG00000048520 | Fbx113        | -0.784249882 | -2.001002526 | -0.24671536 | -0.678941649 |
| ENSMUSG00000086596 | Susd5         | -0.570196347 | -1.98686461  | -0.87882819 | -2.464505841 |
| ENSMUSG00000091658 | -             | -2.091665823 | -1.985832975 | -1.02163399 | -0.294188195 |
| ENSMUSG00000040752 | Myh6          | -2.268883776 | -1.974486494 | -0.55590479 | -1.705900716 |
| ENSMUSG00000058921 | Slc10a5       | -2.44206283  | -1.967357335 | -2.58559627 | -1.706290858 |
| ENSMUSG00000068480 | Gm7551        | -4.829123259 | -1.964030511 | -5.26450165 | -2.108215556 |
| ENSMUSG00000079278 | Tmem233       | -1.963333109 | -1.958873978 | -2.70209941 | 0.247578818  |
| ENSMUSG00000061816 | Myl1          | -3.030402559 | -1.957709331 | -1.53154243 | -0.270443991 |
| ENSMUSG00000033044 | Dhrs7c        | -2.229445529 | -1.951846901 | -0.95357859 | -0.573522742 |
| ENSMUSG00000041476 | Smpx          | -1.822365572 | -1.948922356 | -1.04562956 | -3.950654374 |
| ENSMUSG00000031283 | Chrd1l        | -1.563164049 | -1.948238284 | -0.67614402 | -2.781342929 |
| ENSMUSG00000053093 | Myh7          | -2.383200103 | -1.931675825 | -0.84807637 | -1.6270044   |
| ENSMUSG00000030399 | Ckm           | -2.258700043 | -1.927182337 | -1.29066472 | -0.210336042 |
| ENSMUSG00000052131 | Akr1b7        | -1.26541187  | -1.914828678 | -1.0728143  | -2.07920527  |
| ENSMUSG00000018893 | Mb            | -2.852206317 | -1.909911718 | -1.78532247 | -0.453601218 |
| ENSMUSG00000071343 | Gm10327       | -2.927357854 | -1.908784662 | -5.36222307 | -2.527346779 |
| ENSMUSG00000017300 | Tnnc2         | -2.390898591 | -1.908210288 | -1.24637308 | -0.052130193 |
| ENSMUSG00000026715 | Serpinc1      | -2.058046514 | -1.893598576 | -3.16644939 | -0.295926795 |
| ENSMUSG00000032355 | Mlip          | -0.827273573 | -1.890669372 | -0.29064544 | -2.169779407 |
| ENSMUSG00000027887 | Sypl2         | -2.01527517  | -1.889980342 | -1.3132933  | 0.225748329  |
| ENSMUSG00000041653 | Pnpla3        | -2.672600547 | -1.887677268 | -1.36066822 | -1.60744076  |
| ENSMUSG00000031377 | Bmx           | -1.738371049 | -1.886651678 | -1.10002144 | -3.116076708 |
| ENSMUSG00000040705 | A930016O22Rik | -2.249268347 | -1.884335451 | -1.23908617 | -0.150200495 |
| ENSMUSG00000074217 | 2210011C24Rik | -2.002736765 | -1.86846798  | -0.77601603 | -1.525747788 |



|                    |           |              |              |             |              |
|--------------------|-----------|--------------|--------------|-------------|--------------|
| ENSMUSG00000040289 | Hey1      | -2.153985828 | -1.867172846 | -0.526356   | -0.840619815 |
| ENSMUSG00000031919 | Tmed6     | -3.1952773   | -1.847156774 | -0.66353385 | -0.223317893 |
| ENSMUSG00000052698 | Tln2      | -1.202699376 | -1.841683504 | -0.5639699  | -2.651027899 |
| ENSMUSG00000074505 | Fat3      | -1.23378721  | -1.841080245 | 0.012246794 | -2.809065365 |
| ENSMUSG00000038967 | Pdk2      | -2.070759035 | -1.834904947 | -0.92835445 | -1.29258248  |
| ENSMUSG00000037681 | Esyt3     | -1.800802545 | -1.82566649  | -1.03917393 | -2.635283941 |
| ENSMUSG00000040283 | Btnl9     | -2.929693692 | -1.821391607 | -2.26886625 | -1.779199497 |
| ENSMUSG00000067594 | Krt77     | -2.482105211 | -1.815618919 | -1.62704913 | 0.531424088  |
| ENSMUSG00000041737 | Tmem45b   | -2.646860696 | -1.814419653 | -1.71346996 | -2.831304073 |
| ENSMUSG00000024386 | Proc      | -1.124619292 | -1.801597728 | -2.33608278 | -4.071849023 |
| ENSMUSG00000032064 | Dixdc1    | -1.36618325  | -1.768223992 | -1.16108486 | -2.915329601 |
| ENSMUSG00000069268 | Hist1h2bf | -2.524523516 | -1.765753407 | -0.30996611 | -1.003155517 |
| ENSMUSG00000032401 | Lctl      | -2.382222244 | -1.753912896 | -0.7723561  | -2.793897554 |
| ENSMUSG00000068697 | Myoz1     | -2.066998718 | -1.752220887 | -1.45306562 | 0.047706912  |
| ENSMUSG00000091041 | Gm17720   | 0.368598631  | -1.751016353 | 1.699659136 | -3.523574501 |
| ENSMUSG00000032418 | Me1       | -1.919194391 | -1.748990249 | -1.17753004 | -2.752201914 |
| ENSMUSG00000046834 | Krt1      | -2.297712626 | -1.730439582 | -1.61896451 | 0.309704056  |
| ENSMUSG00000080958 | Gm11902   | -0.95286617  | -1.730414217 | -1.89474113 | -2.104309885 |
| ENSMUSG00000031519 | Asb5      | -2.302215414 | -1.71041587  | -0.91718414 | -0.178137877 |
| ENSMUSG00000042750 | Bex2      | -1.394606149 | -1.708989126 | -0.85424041 | -3.530586488 |
| ENSMUSG00000037010 | Apln      | -1.178935749 | -1.706627674 | -0.51058753 | -2.327393295 |
| ENSMUSG00000032034 | Kcnj5     | -2.087670083 | -1.706143604 | -0.72880046 | -2.751685689 |
| ENSMUSG00000020475 | Pgam2     | -2.129869182 | -1.705205974 | -0.79815373 | -0.440153305 |
| ENSMUSG00000041633 | Kctd12b   | -1.14317883  | -1.704883081 | -1.34336803 | -2.842611532 |
| ENSMUSG00000083502 | Gm14861   | -1.992404144 | -1.696065056 | -2.42640888 | -1.877004467 |
| ENSMUSG00000031841 | Cdh13     | -1.414523115 | -1.690136524 | -0.60961595 | -2.651678976 |
| ENSMUSG00000046782 | Ttc6      | -2.512697532 | -1.688209566 | -2.18034074 | -0.08693562  |
| ENSMUSG00000091431 | -         | 1.695178395  | -1.679608528 | 0.254616041 | -2.465975455 |
| ENSMUSG00000032377 | Plscr4    | -1.166290495 | -1.664886816 | -0.46997714 | -2.567636683 |
| ENSMUSG00000022519 | Srl       | -2.283018937 | -1.659699049 | -0.9953427  | -0.616735454 |
| ENSMUSG00000021909 | -         | -2.745913293 | -1.657504711 | -0.7495571  | -1.189798204 |
| ENSMUSG00000022595 | Lypd2     | -2.402701393 | -1.6567343   | -1.00511318 | -0.655375833 |
| ENSMUSG00000091219 | -         | -1.034220939 | -1.65579433  | 0.056341232 | -3.340139409 |
| ENSMUSG00000091898 | Tnnc1     | -2.750774896 | -1.648655628 | -0.75305661 | -1.191660506 |
| ENSMUSG00000045104 | Gm5514    | -2.050173156 | -1.639880503 | -1.18263436 | -0.876754288 |
| ENSMUSG00000033544 | Angptl1   | -2.223304601 | -1.633437332 | -1.65595082 | -0.075468332 |
| ENSMUSG00000050164 | Mchr1     | -2.131036635 | -1.62703655  | -0.2674891  | -1.276572624 |
| ENSMUSG00000091354 | -         | -2.193412622 | -1.625471866 | -0.53406909 | -2.539213514 |
| ENSMUSG00000028167 | Bdh2      | -2.769605578 | -1.620805923 | -1.04852248 | -2.144603844 |
| ENSMUSG00000035878 | Agphd1    | -0.708524875 | -1.615765997 | -0.80688243 | -3.242700713 |
| ENSMUSG00000030672 | Mylpf     | -2.568217743 | -1.613271706 | -1.48450107 | 0.138982793  |
| ENSMUSG00000050520 | Cldn8     | -1.517798897 | -1.612473486 | -2.07240437 | -1.813856972 |
| ENSMUSG00000084025 | Gm6276    | -0.794290871 | -1.609578527 | -2.27106043 | 0.201864415  |
| ENSMUSG00000048355 | Arxes1    | -1.761154306 | -1.600277124 | -0.52408813 | -2.775028964 |
| ENSMUSG00000032332 | Col12a1   | -1.147051151 | -1.599722759 | -0.45588597 | -2.613764282 |
| ENSMUSG00000083241 | Gm13259   | 0            | -1.589034766 | 0           | -3.28833929  |
| ENSMUSG00000001403 | Ube2c     | -2.203546012 | -1.587110036 | -1.16663453 | 0.081350543  |
| ENSMUSG00000034910 | Pygo1     | -1.206879252 | -1.582476815 | -0.79532126 | -2.754727516 |

|                    |         |              |              |             |              |
|--------------------|---------|--------------|--------------|-------------|--------------|
| ENSMUSG00000020216 | Jsrp1   | -2.275652994 | -1.576358933 | -1.30981986 | -0.430646813 |
| ENSMUSG00000041624 | Gucy1a2 | -1.099534845 | -1.57230902  | -0.33656499 | -2.316998902 |
| ENSMUSG00000040855 | Reps2   | -1.183458291 | -1.571480282 | -0.39179828 | -2.624041176 |
| ENSMUSG00000082629 | Gm5639  | -1.831375325 | -1.568884845 | -0.57839123 | -2.619140858 |
| ENSMUSG00000025815 | Dhtkd1  | -1.490729793 | -1.566807011 | -1.17980703 | -2.195038381 |
| ENSMUSG00000033577 | Myo6    | -0.950664177 | -1.565089421 | -0.70586425 | -2.879349593 |
| ENSMUSG00000006574 | Slc4a1  | -2.480095689 | -1.564199914 | -0.58692589 | -1.724001204 |
| ENSMUSG00000060913 | Trim55  | -2.452552502 | -1.556112226 | -0.27240688 | -0.742306968 |
| ENSMUSG00000061974 | Cldn24  | -2.628829212 | -1.550647757 | -2.6305959  | -0.656532515 |
| ENSMUSG00000032528 | Vipr1   | -0.095807415 | -1.548659115 | -0.09008961 | -2.19290271  |
| ENSMUSG00000071745 | DXBay18 | -1.915559113 | -1.548021341 | -0.60328521 | -2.292532212 |
| ENSMUSG00000006235 | Epor    | -1.263998099 | -1.542363405 | -0.57980321 | -2.334378232 |
| ENSMUSG00000039099 | Wdr93   | -2.058429117 | -1.539573365 | -1.41690527 | -0.44329531  |
| ENSMUSG00000048040 | Arxes2  | -1.61572692  | -1.531006468 | -0.45201998 | -2.844949287 |
| ENSMUSG00000005716 | Pvalb   | -4.820965404 | -1.521945961 | -3.88388528 | 1.251719835  |
| ENSMUSG00000026489 | Adck3   | -2.300370054 | -1.519375305 | -1.99140486 | -1.03877564  |
| ENSMUSG00000040147 | Maob    | -0.858222784 | -1.515471716 | -0.50788553 | -2.665636697 |
| ENSMUSG00000029862 | Cln1    | -2.274128986 | -1.497016494 | -1.66989898 | -0.426414295 |
| ENSMUSG00000056328 | Myh1    | -2.788842134 | -1.486329707 | -1.81780147 | -0.297720364 |
| ENSMUSG00000037493 | Cib2    | -1.176234084 | -1.480928366 | -0.95027982 | -2.483372098 |
| ENSMUSG00000038201 | Kcna7   | -2.377216156 | -1.477255717 | -1.7427641  | 0.69041546   |
| ENSMUSG00000073975 | Olfr550 | -1.480355091 | -1.476256629 | -0.67560168 | -2.169905466 |
| ENSMUSG00000019278 | Dpep1   | -1.352853    | -1.475208967 | -0.41618871 | -2.845837852 |
| ENSMUSG00000067771 | Gm14685 | -2.343299346 | -1.475167341 | -0.06362584 | -2.056114251 |
| ENSMUSG00000037347 | Chst7   | -1.070498429 | -1.473528497 | -0.70099105 | -2.649628045 |
| ENSMUSG00000025810 | Nrp1    | -0.863766066 | -1.471413036 | -0.55082004 | -2.745611685 |
| ENSMUSG00000029735 | Tpk1    | -0.347956869 | -1.464025684 | 0.242932793 | -2.401654756 |
| ENSMUSG00000047844 | Bex4    | -1.113319479 | -1.461639296 | -0.61147762 | -2.808386793 |
| ENSMUSG00000036867 | Smad6   | -1.501995282 | -1.456391512 | -0.48804653 | -2.786048906 |
| ENSMUSG00000036551 | Akap14  | -1.416371589 | -1.454642181 | -0.96438576 | -2.608564913 |
| ENSMUSG00000040533 | Matn1   | -1.084962932 | -1.454456939 | -2.10910909 | -0.657409695 |
| ENSMUSG00000051726 | Kcnf1   | -2.147365172 | -1.452485006 | -0.47428776 | -1.462174849 |
| ENSMUSG00000091867 | Cyp2a22 | -1.047922219 | -1.451778186 | -3.36964289 | -2.025027074 |
| ENSMUSG00000029019 | Nppb    | -3.279261469 | -1.450425202 | 0.255548463 | -0.680201342 |
| ENSMUSG00000083870 | Gm11761 | -0.19097836  | -1.445625219 | -2.57245329 | -0.688072527 |
| ENSMUSG00000007877 | Tcap    | -2.029736792 | -1.438781594 | -1.63161022 | -0.409350124 |
| ENSMUSG00000046240 | Hepacam | -1.915240958 | -1.433270218 | -0.22601261 | -2.882574345 |
| ENSMUSG00000008658 | Rbfox1  | -2.075138771 | -1.425307191 | -1.29111597 | 0.143696961  |
| ENSMUSG00000027022 | Xirp2   | -2.915457087 | -1.420528657 | -1.6205475  | 0.134026024  |
| ENSMUSG00000061311 | Rag1    | -3.28683828  | -1.416665767 | -1.73767561 | -2.419129347 |
| ENSMUSG00000090889 | Gm17428 | -2.005983268 | -1.406741302 | -0.60205253 | -1.570191495 |
| ENSMUSG00000025893 | Kbtbd3  | -0.614792828 | -1.389607216 | -0.12653397 | -2.638012306 |
| ENSMUSG00000032554 | Trf     | -0.981853689 | -1.382869984 | -0.40097025 | -2.42660013  |
| ENSMUSG00000079669 | Gm17396 | -0.413217656 | -1.378223064 | -0.21682652 | -3.840018295 |
| ENSMUSG00000029195 | Klb     | -1.794933473 | -1.376032291 | -1.36116414 | -2.208162948 |
| ENSMUSG00000091138 | -       | -1.207698329 | -1.373870506 | -0.18984472 | -2.7979696   |
| ENSMUSG00000061723 | Tnnt3   | -2.259568364 | -1.373778625 | -1.31716269 | 0.032719063  |
| ENSMUSG00000009216 | Fam163b | 0.82387305   | -1.368638475 | 1.753658488 | -2.071556041 |

|                    |               |              |              |             |              |
|--------------------|---------------|--------------|--------------|-------------|--------------|
| ENSMUSG00000078820 | -             | -2.697523802 | -1.362181972 | -1.45377623 | -0.373911814 |
| ENSMUSG00000032527 | Pccb          | -1.303857303 | -1.361822857 | -0.56284683 | -2.489020462 |
| ENSMUSG00000054978 | Kbtbd13       | -1.532310183 | -1.360692603 | -1.55440442 | -3.298135692 |
| ENSMUSG00000071317 | Bves          | -2.057845313 | -1.353190878 | -1.2566518  | -0.526751593 |
| ENSMUSG00000087365 | C430049B03Rik | -0.816388845 | -1.342830955 | 0.110729808 | -2.500494715 |
| ENSMUSG00000045414 | 1190002N15Rik | -1.19756225  | -1.339551803 | -0.8283812  | -2.605784035 |
| ENSMUSG00000022040 | Ephx2         | -2.014744285 | -1.335394425 | -1.24972369 | -1.663986221 |
| ENSMUSG00000090983 | -             | -1.023583149 | -1.32587641  | -2.56815078 | -2.251476633 |
| ENSMUSG00000092099 | Gm17530       | 0.270422562  | -1.319089754 | 0.140726713 | -3.21022094  |
| ENSMUSG00000058463 | Gm5471        | 0.03363021   | -1.313811184 | -0.81749877 | -2.249121881 |
| ENSMUSG00000058254 | Tspan7        | -0.998948536 | -1.304182902 | -0.49459139 | -2.737588362 |
| ENSMUSG00000087466 | A330041J22Rik | -2.243302208 | -1.30378944  | -1.02765212 | -2.097683715 |
| ENSMUSG00000036395 | Glb112        | -0.879272331 | -1.30200474  | -0.65020957 | -3.25904645  |
| ENSMUSG00000061780 | Cfd           | -2.908303733 | -1.298146514 | -0.8379074  | -1.74780221  |
| ENSMUSG00000032549 | Rab6b         | -1.619697142 | -1.295854173 | -0.86853465 | -3.642408179 |
| ENSMUSG00000031379 | Pir           | -0.658908529 | -1.293659817 | -0.35936547 | -2.736670906 |
| ENSMUSG00000042045 | Sln           | -1.846617444 | -1.292086028 | -0.85868245 | -2.034177792 |
| ENSMUSG00000091345 | Col6a5        | -1.949908452 | -1.286973838 | -0.85786013 | -3.34412127  |
| ENSMUSG00000023092 | Fhl1          | -1.133966801 | -1.286477521 | -0.4684026  | -2.773996766 |
| ENSMUSG00000038233 | Fam198a       | -1.709963382 | -1.285799221 | -0.25965687 | -2.205792418 |
| ENSMUSG00000073681 | -             | -2.663586497 | -1.276091642 | -3.09596956 | -1.019499434 |
| ENSMUSG00000043719 | Col6a6        | -1.398591146 | -1.27237732  | -0.81002767 | -2.386054732 |
| ENSMUSG00000066235 | Gtdc2         | -0.963274694 | -1.266606113 | -0.33786222 | -2.591575818 |
| ENSMUSG00000032511 | Scn5a         | -2.049879676 | -1.259694029 | 0.009184735 | -2.430003794 |
| ENSMUSG00000049281 | Scn3b         | -1.063701278 | -1.257532194 | -0.52929887 | -2.39367125  |
| ENSMUSG00000084137 | Gm9085        | 0.908809551  | -1.256109898 | 0.077871517 | -3.783615594 |
| ENSMUSG00000047419 | Cmya5         | -2.210552695 | -1.254290827 | -1.43220518 | -0.277801126 |
| ENSMUSG00000038064 | Cldn22        | -2.133335657 | -1.237028512 | -2.53234582 | -0.601292957 |
| ENSMUSG00000079428 | Tceal7        | -0.930688626 | -1.236560442 | -0.5863613  | -2.208249769 |
| ENSMUSG00000086780 | -             | -1.935083609 | -1.233523793 | -0.63796665 | -2.705982395 |
| ENSMUSG00000032417 | Rwdd2a        | -1.049703683 | -1.225568017 | -0.27838707 | -2.403547527 |
| ENSMUSG00000032348 | Gsta4         | -1.087184056 | -1.223115546 | -0.38312192 | -2.112335269 |
| ENSMUSG00000027713 | 1810062G17Rik | 1.022870029  | -1.219694273 | 0.376196646 | -3.134991983 |
| ENSMUSG00000057003 | Myh4          | -2.6788016   | -1.21602875  | -1.7971851  | 0.313151404  |
| ENSMUSG00000054034 | Tceal5        | -0.661043135 | -1.206470391 | -0.00247942 | -2.347424004 |
| ENSMUSG00000038204 | Asb10         | -2.991789445 | -1.202932977 | -1.25220122 | 0.036633227  |
| ENSMUSG00000046818 | Ddit4l        | -2.085170174 | -1.20181794  | -1.46368379 | 0.315739991  |
| ENSMUSG00000039607 | Rbms3         | -0.615553137 | -1.19475058  | -0.20404693 | -2.443894662 |
| ENSMUSG00000052374 | Actn2         | -2.539506929 | -1.190570682 | -1.08896584 | -0.238326509 |
| ENSMUSG00000090642 | Gm17182       | -1.357869099 | -1.186874617 | -0.7733976  | -2.120968646 |
| ENSMUSG00000031996 | Aplp2         | -0.812843059 | -1.186755783 | -0.38419535 | -2.586478201 |
| ENSMUSG00000038239 | Hrc           | -2.315457901 | -1.186679279 | -1.10920524 | -0.560424572 |
| ENSMUSG00000025037 | Maoa          | -0.593656007 | -1.180397097 | -0.50465476 | -2.642812356 |
| ENSMUSG00000029368 | Alb           | -9.964365666 | -1.179199564 | -7.70048045 | -0.810365507 |
| ENSMUSG00000066072 | Cyp4a10       | -2.028451952 | -1.177029985 | -1.51165228 | -0.967332058 |
| ENSMUSG00000090639 | Gm20425       | -0.903122372 | -1.173162579 | -0.36005128 | -2.309265117 |
| ENSMUSG00000001349 | Cnn1          | -0.416416059 | -1.172434505 | 0.696737223 | -2.14876739  |
| ENSMUSG00000040875 | Osbp110       | -1.022727086 | -1.172107867 | -0.6131885  | -2.154419376 |

|                    |               |              |              |             |              |
|--------------------|---------------|--------------|--------------|-------------|--------------|
| ENSMUSG00000028396 | 2310002L09Rik | -3.543624927 | -1.172095406 | -1.99344867 | -1.106674236 |
| ENSMUSG00000026085 | Lyg1          | -4.165373009 | -1.168789635 | -0.42812778 | -1.548359882 |
| ENSMUSG00000091119 | Ccdc152       | 1.571038132  | -1.16709139  | 0.730943702 | -2.42851247  |
| ENSMUSG00000059495 | Arhgef12      | -0.5079535   | -1.156962445 | -0.43228205 | -2.476280715 |
| ENSMUSG00000031373 | Car5b         | -1.733180994 | -1.150655667 | -1.10476805 | -2.492595034 |
| ENSMUSG00000031097 | Tnni2         | -2.373675991 | -1.145270474 | -1.36631044 | 0.30185627   |
| ENSMUSG00000046242 | 1600029I14Rik | -1.040886099 | -1.142264775 | -0.73229442 | -2.491047726 |
| ENSMUSG00000052934 | Fbxo31        | -0.948857852 | -1.129179898 | -0.18777191 | -2.110406936 |
| ENSMUSG00000031495 | Cd209d        | -2.412892492 | -1.124008481 | -1.0172011  | -1.103577867 |
| ENSMUSG00000036782 | Klhl13        | -1.082132133 | -1.123545835 | -0.81459177 | -2.067464499 |
| ENSMUSG00000008035 | Mid1ip1       | -0.955683502 | -1.119820706 | -0.22543654 | -2.106478434 |
| ENSMUSG00000033590 | Myo5c         | -1.120971736 | -1.117743588 | -0.43185081 | -2.246079143 |
| ENSMUSG00000090150 | Acad11        | -0.961107049 | -1.117433402 | -0.6534033  | -2.325952215 |
| ENSMUSG00000031292 | Cdk15         | -0.814580866 | -1.11203592  | -0.60038672 | -2.275315457 |
| ENSMUSG00000031209 | Heph          | -0.679719312 | -1.111837041 | 0.130217217 | -2.973709285 |
| ENSMUSG00000086119 | Gm2415        | -0.675044701 | -1.111349833 | 0.439802522 | -2.414245297 |
| ENSMUSG00000046532 | Ar            | -0.498539905 | -1.104119485 | -0.60591702 | -2.836178366 |
| ENSMUSG00000032203 | Pigb          | -0.758586754 | -1.101732731 | -0.48519022 | -2.165838764 |
| ENSMUSG00000061273 | Mmgt1         | -0.676346998 | -1.098959238 | -0.43858432 | -2.217136276 |
| ENSMUSG00000087644 | Gm14703       | -0.47881029  | -1.091997094 | -0.05074091 | -2.179629417 |
| ENSMUSG00000050671 | Ism2          | -2.047380671 | -1.087594474 | -0.72343312 | -2.510785641 |
| ENSMUSG00000000266 | Mid2          | -0.622829596 | -1.084800735 | -0.50139124 | -2.498653466 |
| ENSMUSG00000085173 | Gm2869        | -1.447091513 | -1.083317891 | -2.00332487 | -0.181457876 |
| ENSMUSG00000061393 | Acvr2b        | -0.924063234 | -1.08058448  | -0.38509237 | -2.544533109 |
| ENSMUSG00000038663 | Fsd2          | -2.04312455  | -1.080223507 | -1.17797586 | -0.890783293 |
| ENSMUSG00000025784 | Clec3b        | -0.996034813 | -1.076606792 | -0.05833216 | -2.295571001 |
| ENSMUSG00000033350 | Chst2         | -0.926961103 | -1.074581121 | -0.15591214 | -2.516189855 |
| ENSMUSG00000051226 | -             | -2.031610906 | -1.073864572 | -1.69062165 | -0.642711214 |
| ENSMUSG00000032452 | Clstn2        | -0.696265186 | -1.073615203 | -0.07336145 | -2.369290537 |
| ENSMUSG00000047412 | Zbtb44        | -0.579507898 | -1.07293985  | -0.26174781 | -2.223728669 |
| ENSMUSG00000069620 | Dppa5b        | -0.689396679 | -1.071247819 | 1.232930154 | -2.735398749 |
| ENSMUSG00000032076 | Cadm1         | -0.745414388 | -1.070855913 | -0.33748691 | -2.474929875 |
| ENSMUSG00000039956 | Mrap          | -2.384466034 | -1.067544672 | -1.25939575 | -1.437576974 |
| ENSMUSG00000027442 | Cst8          | -0.674551947 | -1.06397226  | -2.70352868 | -1.06397226  |
| ENSMUSG00000042903 | Foxo4         | -1.065489944 | -1.060716464 | -0.35079888 | -2.300215248 |
| ENSMUSG00000078864 | Gm14322       | 0.729535936  | -1.055320546 | 0.680493134 | -2.363199984 |
| ENSMUSG00000087156 | -             | -0.479078114 | -1.055011184 | 0.458342143 | -2.105850285 |
| ENSMUSG00000032526 | Deb1          | -0.970201166 | -1.054914599 | -0.43448758 | -2.95987485  |
| ENSMUSG00000024512 | 2310002L13Rik | -2.241656372 | -1.051392985 | 0.550422529 | -0.453276159 |
| ENSMUSG00000070306 | Ccdc153       | -1.255504274 | -1.045118498 | -0.7496025  | -2.255815777 |
| ENSMUSG00000082605 | Gm16148       | -1.1928499   | -1.043570582 | -3.41821706 | -0.35803194  |
| ENSMUSG00000043518 | Rai2          | -0.74160594  | -1.04255028  | -0.87798145 | -2.389951714 |
| ENSMUSG00000091332 | -             | 0.409547234  | -1.041509216 | -2.95826575 | -2.917384188 |
| ENSMUSG00000068270 | Shroom4       | -0.713063312 | -1.036268249 | -0.34209744 | -2.117298781 |
| ENSMUSG00000072641 | Cux2          | 0.610030625  | -1.036100058 | 1.736955128 | -2.554284704 |
| ENSMUSG00000050071 | Bex1          | -1.174749604 | -1.029649873 | -0.75337453 | -2.480472355 |
| ENSMUSG00000041012 | Cmtm8         | -0.976823174 | -1.028057347 | -0.4419414  | -2.001762528 |
| ENSMUSG00000047409 | Ctdspl        | -0.688129045 | -1.026225868 | -0.29090083 | -2.403908451 |

|                    |         |              |              |             |              |
|--------------------|---------|--------------|--------------|-------------|--------------|
| ENSMUSG00000042073 | Abhd14b | -1.153375508 | -1.024451628 | -0.41761604 | -2.533366985 |
| ENSMUSG00000034467 | Dynlrb2 | -0.928443637 | -1.017905865 | -0.38448623 | -2.134562733 |
| ENSMUSG00000032263 | Bckdhh  | -0.756243798 | -1.016906167 | -0.29023284 | -2.38836012  |
| ENSMUSG00000049555 | Tmie    | -1.458648747 | -1.015621534 | -0.18467465 | -2.494776253 |
| ENSMUSG00000055653 | Gpc3    | -1.372503398 | -1.01547841  | -0.44766638 | -2.351683567 |
| ENSMUSG00000034563 | Ccpg1   | -0.839804135 | -1.01144824  | -0.66615871 | -2.39746816  |
| ENSMUSG00000041361 | Myzap   | -1.271945255 | -1.009924089 | -0.77035069 | -2.559190215 |
| ENSMUSG00000057880 | Abat    | -2.159012432 | -1.008951464 | -1.04620049 | -1.152454229 |
| ENSMUSG00000020295 | Hbq1a   | -2.083471719 | -1.008121568 | -1.51153273 | 0.997146381  |
| ENSMUSG00000055733 | Nap113  | -0.909890068 | -1.007546809 | -0.10576204 | -2.233640436 |
| ENSMUSG00000035847 | Ids     | -0.474608699 | -1.007428181 | -0.46158196 | -2.463303797 |
| ENSMUSG00000084158 | Gm14652 | -1.509834923 | -1.001128297 | -0.24642928 | -2.408910184 |
| ENSMUSG00000049556 | Lingo1  | -1.17232874  | -0.995909982 | -1.26980894 | -2.180705894 |
| ENSMUSG00000059327 | Eda     | -1.238617788 | -0.995908653 | -0.7232446  | -2.67625318  |
| ENSMUSG00000039278 | Pcsk1n  | -1.004465765 | -0.991448442 | 0.24866801  | -3.185159108 |
| ENSMUSG00000031434 | Morc4   | -0.93565279  | -0.991056206 | -0.11536846 | -2.543415946 |
| ENSMUSG00000089865 | Gm20510 | -0.840672951 | -0.988770823 | -0.63830717 | -2.344970446 |
| ENSMUSG00000056267 | Cep70   | -1.231981691 | -0.988748663 | -1.15638339 | -2.431619015 |
| ENSMUSG00000006373 | Pgrmc1  | -1.015054497 | -0.986339115 | -0.44644492 | -2.297448672 |
| ENSMUSG00000052187 | Hbb-y   | -2.081871336 | -0.985892382 | -1.46390464 | -0.808458474 |
| ENSMUSG00000031144 | Syp     | -0.495707371 | -0.980313725 | -0.1027075  | -2.328317394 |
| ENSMUSG00000034584 | Exph5   | -0.690759778 | -0.976726899 | -0.54395309 | -2.469901533 |
| ENSMUSG00000074673 | Ttl9    | -2.42701226  | -0.972236816 | -1.80970363 | -0.25862269  |
| ENSMUSG00000078640 | Gm11627 | -2.926281487 | -0.970296188 | -1.03288889 | -1.68621053  |
| ENSMUSG00000001995 | Sipa112 | -0.637799975 | -0.970008151 | -0.36405595 | -2.335034514 |
| ENSMUSG00000001948 | Spa17   | -0.891923844 | -0.969362214 | -0.80221645 | -2.010264363 |
| ENSMUSG00000074001 | Kbtbd5  | -2.418082759 | -0.967900229 | -0.93193025 | -1.185692317 |
| ENSMUSG00000054863 | Fam19a5 | -2.124319789 | -0.966948791 | -1.00618988 | -0.27358986  |
| ENSMUSG00000032198 | Dock6   | -0.759780732 | -0.961706724 | -0.01291865 | -2.364401164 |
| ENSMUSG00000032531 | Amotl2  | -0.930243621 | -0.957073712 | -0.50124352 | -2.382760268 |
| ENSMUSG00000032366 | Tpm1    | -1.039216584 | -0.956367191 | -0.5393341  | -2.171198823 |
| ENSMUSG00000043154 | Ppp2r3a | -1.156242802 | -0.953489062 | -0.85576748 | -2.109511872 |
| ENSMUSG00000040883 | Tmem205 | -0.679183126 | -0.953076081 | -0.64772411 | -2.412824403 |
| ENSMUSG00000041748 | Ccr11   | -0.321504364 | -0.928352886 | -0.1192947  | -2.027215471 |
| ENSMUSG00000016386 | Mpped2  | -2.428809881 | -0.925395274 | -0.10929881 | -0.693374181 |
| ENSMUSG00000032380 | Dapk2   | -1.226842882 | -0.925049139 | -0.7449372  | -2.373695695 |
| ENSMUSG00000035202 | Lars2   | -0.630818033 | -0.921233746 | -0.43415801 | -2.668922237 |
| ENSMUSG00000010051 | Hyal1   | -0.455638221 | -0.919885193 | -0.0126171  | -2.48034545  |
| ENSMUSG00000001943 | Vsig2   | -0.33905076  | -0.912527338 | 0.181473409 | -2.619591098 |
| ENSMUSG00000025597 | Klhl4   | -0.344476317 | -0.910932717 | -1.01779736 | -3.306820099 |
| ENSMUSG00000033460 | Armcx1  | -0.699971296 | -0.897056657 | -0.71149678 | -2.7943218   |
| ENSMUSG00000032374 | Plod2   | -0.80481289  | -0.896822173 | -0.33877769 | -2.21747597  |
| ENSMUSG00000083772 | Gm15566 | -0.353246848 | -0.896691787 | -1.48947544 | -5.006310295 |
| ENSMUSG00000033196 | Myh2    | -3.073247264 | -0.896539546 | -2.03849114 | 0.251977102  |
| ENSMUSG00000043384 | Gprasp1 | -0.633889363 | -0.8922382   | -0.05321657 | -2.099690106 |
| ENSMUSG00000032609 | Klhdc8b | -0.976207572 | -0.882235339 | 0.160010848 | -2.062415017 |
| ENSMUSG00000092137 | Gcom1   | -1.02552141  | -0.875075013 | -0.6389807  | -2.289546484 |
| ENSMUSG00000089883 | Gm3355  | -1.909800568 | -0.868166163 | -2.0216981  | 1.189091865  |

|                    |               |              |              |             |              |
|--------------------|---------------|--------------|--------------|-------------|--------------|
| ENSMUSG00000046480 | Scn4b         | -2.18739305  | -0.866308235 | -1.42816489 | -1.168121823 |
| ENSMUSG00000031431 | Tsc22d3       | -0.363449404 | -0.865280749 | 0.11608123  | -2.146580265 |
| ENSMUSG00000047485 | Klhl34        | -2.184837676 | -0.864946913 | -1.50943149 | -1.800201709 |
| ENSMUSG00000031299 | Pdha1         | -1.034505752 | -0.864155876 | -0.85711734 | -2.295102852 |
| ENSMUSG00000084118 | Gm14989       | 1.87415919   | -0.861436676 | 0.658650242 | -2.446526214 |
| ENSMUSG00000075587 | Gm11531       | -2.081568141 | -0.85749382  | -1.52877089 | -1.218590068 |
| ENSMUSG00000031812 | Map1lc3b      | -0.5916763   | -0.85611628  | -0.24814251 | -2.29994551  |
| ENSMUSG00000052911 | Lamb2         | -0.654885387 | -0.854953388 | -0.18822778 | -2.271282347 |
| ENSMUSG00000042812 | Foxf1         | -0.533053942 | -0.85325697  | -0.23311344 | -2.532200915 |
| ENSMUSG00000030730 | Atp2a1        | -2.484984492 | -0.850779421 | -1.97463821 | 0.48561039   |
| ENSMUSG00000027077 | Smtnl1        | -2.173858402 | -0.848490544 | -1.45334994 | 0.387420403  |
| ENSMUSG00000032387 | Rbpms2        | -0.529481777 | -0.845715601 | -0.76560016 | -2.678836541 |
| ENSMUSG00000006675 | P4htm         | -0.923060823 | -0.839807298 | -0.48643653 | -2.700660351 |
| ENSMUSG00000074854 | -             | -3.334106089 | -0.834595537 | -4.7206447  | -0.946879588 |
| ENSMUSG00000032232 | Cgnl1         | -0.665205307 | -0.832865361 | -0.39468583 | -2.262416293 |
| ENSMUSG00000081098 | Gm12220       | -2.38475667  | -0.827655802 | -0.17076025 | -0.056536257 |
| ENSMUSG00000029236 | Nmu           | -2.549978994 | -0.827654833 | -0.21856311 | -0.771722293 |
| ENSMUSG00000061490 | Ube2d4        | -2.032585501 | -0.827396662 | -1.44231634 | -0.031690381 |
| ENSMUSG00000032311 | Nrg4          | -0.09073563  | -0.826317947 | -0.4563426  | -2.030206081 |
| ENSMUSG00000032449 | Slc25a36      | -0.499287398 | -0.824978554 | -0.43765715 | -2.124986563 |
| ENSMUSG00000071347 | C1qtnf9       | -2.354022953 | -0.82447585  | -1.06678875 | -0.873367778 |
| ENSMUSG00000063632 | Sox11         | -2.151350656 | -0.823511072 | -0.66076342 | 0.01135941   |
| ENSMUSG00000033965 | Slc16a2       | -0.74797748  | -0.819280113 | -0.12528823 | -2.175847112 |
| ENSMUSG00000042444 | Fam63b        | -0.41557307  | -0.818859344 | -0.09469216 | -2.029106352 |
| ENSMUSG00000052658 | 5830454E08Rik | -0.815433899 | -0.811045983 | -0.23424578 | -2.546418487 |
| ENSMUSG00000032911 | Cspg4         | -0.17077378  | -0.807535045 | 0.367670866 | -2.010314892 |
| ENSMUSG00000032375 | Aph1b         | -0.31555514  | -0.806263336 | -0.24982156 | -2.097249642 |
| ENSMUSG00000032194 | Kank2         | -0.827640841 | -0.79951413  | -0.2994802  | -2.380122859 |
| ENSMUSG00000038145 | Snrk          | -0.162586303 | -0.796630344 | 0.123101583 | -2.092418958 |
| ENSMUSG00000032246 | Calml4        | -0.751313726 | -0.792372354 | -0.69406491 | -2.5394208   |
| ENSMUSG00000031216 | Stard8        | -0.618426112 | -0.791476149 | -0.12155808 | -2.119765533 |
| ENSMUSG00000032279 | Idh3a         | -0.856121536 | -0.789436102 | -0.77392368 | -2.193405644 |
| ENSMUSG00000050730 | Arhgap42      | -0.180217427 | -0.784461454 | 0.191636087 | -2.294679416 |
| ENSMUSG00000045103 | Dmd           | -0.815035154 | -0.781960973 | -0.46862977 | -2.20445065  |
| ENSMUSG00000081236 | Gm13574       | 1.412034138  | -0.777572415 | 0.325530771 | -2.286730511 |
| ENSMUSG00000028116 | Myoz2         | -2.12837244  | -0.767032977 | -0.97515922 | -0.84407092  |
| ENSMUSG00000051234 | Rnf7          | -0.531678799 | -0.7588698   | -0.46439657 | -2.046507989 |
| ENSMUSG00000031425 | Plp1          | -0.38858194  | -0.75874688  | -0.17380828 | -2.051334715 |
| ENSMUSG00000032010 | Usp2          | -0.395683956 | -0.757928018 | -0.046271   | -2.053144827 |
| ENSMUSG00000080254 | Gm15380       | -0.468421934 | -0.75328397  | -0.84907096 | -2.177827685 |
| ENSMUSG00000074046 | -             | -0.333850849 | -0.752735244 | -0.03848016 | -3.232312995 |
| ENSMUSG00000013076 | Amotl1        | -0.816845745 | -0.750908644 | -0.3100476  | -2.225099198 |
| ENSMUSG00000066357 | Wdr6          | -0.792754438 | -0.749311485 | -0.46724676 | -2.154227803 |
| ENSMUSG00000028773 | Fabp3         | -2.420647379 | -0.749174137 | -1.68558506 | -1.322906843 |
| ENSMUSG00000048537 | Phldb1        | -0.880285146 | -0.747176863 | -0.0896424  | -2.073097073 |
| ENSMUSG00000051133 | Gm6293        | -1.038961756 | -0.740604961 | 1.231173199 | -2.04194717  |
| ENSMUSG00000032839 | Trpc1         | 0.007829517  | -0.73588739  | -0.31607487 | -2.149694924 |
| ENSMUSG00000056366 | Fabp3-ps1     | -2.602643901 | -0.735576377 | -1.81929881 | -1.40388012  |

|                    |               |              |              |             |              |
|--------------------|---------------|--------------|--------------|-------------|--------------|
| ENSMUSG00000083416 | Gm15378       | -0.921793416 | -0.731846939 | -0.1369675  | -2.649463511 |
| ENSMUSG00000032047 | Acat1         | -0.974676436 | -0.730351259 | -0.90280035 | -2.232922973 |
| ENSMUSG00000080795 | Gm6783        | -0.318354848 | -0.728244518 | -0.83358828 | -2.977668859 |
| ENSMUSG00000082245 | Gm6292        | -0.129931462 | -0.726752821 | -0.98082343 | -4.581170033 |
| ENSMUSG00000085396 | 6720401G13Rik | -0.804127598 | -0.721376517 | -0.09248141 | -2.770448548 |
| ENSMUSG00000032733 | Snx33         | -0.589782421 | -0.721322409 | -0.28537395 | -2.022693576 |
| ENSMUSG00000046714 | Foxc2         | -0.897026201 | -0.71998463  | 0.07884974  | -2.473246128 |
| ENSMUSG00000032216 | Nedd4         | -0.431392545 | -0.719614378 | -0.41002624 | -2.270394969 |
| ENSMUSG00000087096 | -             | -1.188201821 | -0.712287966 | -2.03621346 | 0.840269145  |
| ENSMUSG00000031253 | Srpx2         | -0.086082789 | -0.706480348 | 0.142606889 | -2.407375538 |
| ENSMUSG00000046402 | Rbp1          | -0.357682545 | -0.702464109 | -0.10463732 | -2.281687618 |
| ENSMUSG00000025862 | Stag2         | -0.225303672 | -0.701407957 | -0.36632434 | -2.141105127 |
| ENSMUSG00000081797 | Gm8662        | -0.028242128 | -0.698994379 | -0.47141245 | -7.139299157 |
| ENSMUSG00000032356 | Rasgrf1       | -1.305674381 | -0.697325056 | -0.14670088 | -3.239412054 |
| ENSMUSG00000031176 | Dynlt3        | -0.28451685  | -0.695876429 | -0.28872724 | -2.005425766 |
| ENSMUSG00000032067 | Pts           | -0.182140395 | -0.694520412 | -0.48378047 | -2.21110557  |
| ENSMUSG00000025812 | Pard3         | -0.426817042 | -0.694018328 | -0.03679841 | -2.091339502 |
| ENSMUSG00000037287 | Tbcel         | -0.575139803 | -0.693833915 | -0.47845152 | -2.035413444 |
| ENSMUSG00000037358 | 4930578C19Rik | -0.153283242 | -0.692863561 | -0.05617759 | -2.983319175 |
| ENSMUSG00000032085 | Tagln         | -0.384130842 | -0.685158632 | 0.420444956 | -2.086411384 |
| ENSMUSG00000041696 | Rasl12        | -0.801467343 | -0.683796139 | -0.27776776 | -2.29545279  |
| ENSMUSG00000083897 | Gm14843       | -0.661503987 | -0.681445938 | -0.19958631 | -2.842161717 |
| ENSMUSG00000032398 | Snape5        | -0.694055471 | -0.67344087  | -0.39477045 | -2.203527152 |
| ENSMUSG00000043943 | Naalad2       | -0.222293653 | -0.672600713 | -0.14413854 | -2.168109272 |
| ENSMUSG00000041688 | Amot          | -1.147401034 | -0.671933938 | -1.01049695 | -2.212778137 |
| ENSMUSG00000021622 | Ckmt2         | -4.313264323 | -0.670443736 | -2.68042233 | 0.225374814  |
| ENSMUSG00000049804 | Armcx4        | -1.01874978  | -0.667326623 | -0.86757391 | -2.674763586 |
| ENSMUSG00000073158 | 9030624G23Rik | -1.794496058 | -0.66069227  | -3.79834012 | -0.515352943 |
| ENSMUSG00000020061 | Mybpc1        | -2.243739921 | -0.655177439 | -1.40381492 | 0.387572401  |
| ENSMUSG00000001366 | Fbxo9         | -0.570333017 | -0.650941101 | -0.39040624 | -2.004143879 |
| ENSMUSG00000080878 | Gm15618       | -0.990340632 | -0.649622679 | -0.96789589 | -3.138018528 |
| ENSMUSG00000081281 | Gm6274        | -0.063494298 | -0.646304271 | -0.13302429 | -2.330227585 |
| ENSMUSG00000037971 | 1110032A03Rik | -0.586156636 | -0.641514099 | -0.34712652 | -2.013254755 |
| ENSMUSG00000062319 | Gm10115       | -2.918555234 | -0.637207882 | 0.618231662 | -0.234189331 |
| ENSMUSG00000032086 | Bace1         | -0.601423926 | -0.635289452 | -0.20822172 | -2.125175159 |
| ENSMUSG00000025260 | Hsd17b10      | -0.935942259 | -0.634486313 | -0.46995232 | -2.032959805 |
| ENSMUSG00000031997 | Trpc6         | -0.272972934 | -0.631131614 | -0.25602676 | -2.153090071 |
| ENSMUSG00000038119 | Cdon          | -0.796881364 | -0.630446683 | -0.52882595 | -2.336977687 |
| ENSMUSG00000080811 | Gm14513       | 0.102642473  | -0.629564574 | -0.28242163 | -2.725070264 |
| ENSMUSG00000082192 | Gm14719       | -0.943389237 | -0.607630222 | -0.34174058 | -2.883593862 |
| ENSMUSG00000079564 | Gm11149       | -1.674474493 | -0.606490835 | -1.25953173 | -2.079331225 |
| ENSMUSG00000091437 | -             | -2.825260221 | -0.606364492 | -4.78560509 | -1.893339693 |
| ENSMUSG00000041729 | Coro2b        | -0.529139815 | -0.605076599 | 0.054829833 | -2.106431287 |
| ENSMUSG00000032548 | Slco2a1       | -0.404395663 | -0.604027806 | -0.10816049 | -2.162240096 |
| ENSMUSG00000087151 | Gm14022       | -3.10308377  | -0.601188714 | -0.96903881 | -0.26172348  |
| ENSMUSG00000060125 | -             | -3.79479488  | -0.594639589 | -4.26799549 | -0.643935594 |
| ENSMUSG00000081750 | Gm4995        | -0.616899425 | -0.593259024 | -0.48889852 | -2.072477418 |
| ENSMUSG00000031980 | Agt           | -2.853844237 | -0.585514551 | -1.63798659 | -2.217268187 |

|                    |               |              |              |             |              |
|--------------------|---------------|--------------|--------------|-------------|--------------|
| ENSMUSG00000039585 | Myo9a         | -0.40005234  | -0.585054224 | -0.37153032 | -2.240076661 |
| ENSMUSG00000032134 | Muc16         | 0.027266354  | -0.582162139 | -0.2592117  | -2.461054045 |
| ENSMUSG00000090963 | Gm17655       | -0.487800195 | -0.581582932 | -0.97028213 | -2.316858223 |
| ENSMUSG00000079361 | -             | 1.974791392  | -0.5801685   | 1.688501517 | -2.048935204 |
| ENSMUSG00000038775 | Vill          | -0.292380276 | -0.577431496 | 0.054307262 | -2.419307006 |
| ENSMUSG00000035776 | Cd99l2        | -0.596897622 | -0.573041279 | -0.42459841 | -2.013319058 |
| ENSMUSG00000032547 | Ryk           | -0.543762308 | -0.571848561 | -0.29210213 | -2.098873175 |
| ENSMUSG00000031274 | Col4a5        | -0.879792318 | -0.570169618 | -0.59237036 | -2.179151683 |
| ENSMUSG00000059237 | Ppp1r2-ps4    | -0.070671575 | -0.569125903 | -0.23852241 | -2.273163141 |
| ENSMUSG00000053310 | Nrgn          | -0.80204914  | -0.568441713 | 0.423073465 | -2.125459889 |
| ENSMUSG00000001946 | Esam          | -0.194181699 | -0.568123506 | 0.004420653 | -2.070543863 |
| ENSMUSG00000041658 | Rragb         | -0.596934801 | -0.56437096  | -0.31530766 | -2.242797891 |
| ENSMUSG00000006241 | Ccdc159       | -0.648511291 | -0.562210885 | -0.33214248 | -2.781133429 |
| ENSMUSG00000085718 | Rpl9-ps3      | -3.847306583 | -0.557658095 | -4.86020833 | -0.557658095 |
| ENSMUSG00000031938 | 4931406C07Rik | -0.510695365 | -0.555876255 | -0.49520106 | -2.244298171 |
| ENSMUSG00000080942 | Gm14556       | -0.137524638 | -0.555004927 | 0.151072668 | -2.848818534 |
| ENSMUSG00000002010 | Idh3g         | -0.811953234 | -0.554732908 | -0.47706688 | -2.005915765 |
| ENSMUSG00000032060 | Cryab         | -0.875976324 | -0.552999354 | -0.36020086 | -2.064756905 |
| ENSMUSG00000031409 | Tceal6        | -0.55341117  | -0.548589238 | -0.23346254 | -3.016557739 |
| ENSMUSG00000047168 | Gm6684        | -2.549445047 | -0.547633185 | -0.33942084 | -0.936854415 |
| ENSMUSG00000032570 | Atp2c1        | -0.434347861 | -0.542929847 | -0.48954664 | -2.041078691 |
| ENSMUSG00000059401 | Mamld1        | -0.326858718 | -0.54155109  | -0.16624053 | -2.301591691 |
| ENSMUSG00000039952 | Dag1          | -0.601315612 | -0.540316362 | -0.24326331 | -2.088500346 |
| ENSMUSG00000032349 | Elov15        | -0.511235789 | -0.534867387 | -0.25217547 | -2.131913161 |
| ENSMUSG00000009471 | Myod1         | -3.756495145 | -0.533823942 | -2.41446901 | 0.092012021  |
| ENSMUSG00000000881 | Dlg3          | -0.338226273 | -0.527840471 | -0.44155972 | -2.029466451 |
| ENSMUSG00000079334 | Nat6          | -0.596816849 | -0.526962847 | 0.013533498 | -2.16749827  |
| ENSMUSG00000042271 | Nxt2          | -0.343986463 | -0.523174275 | -0.54751528 | -2.10301794  |
| ENSMUSG00000082755 | Gm8692        | -0.2360728   | -0.522399365 | -0.07641498 | -2.630041567 |
| ENSMUSG00000000168 | Dlat          | -0.82836617  | -0.519271181 | -0.6694817  | -2.026361258 |
| ENSMUSG00000028989 | Angptl7       | -2.384646598 | -0.517767607 | -1.64268719 | 0.135367292  |
| ENSMUSG00000081996 | Gm7153        | 0.236893367  | -0.516476847 | 0.220851576 | -2.096663719 |
| ENSMUSG00000032249 | Anp32a        | -0.590312987 | -0.514647511 | -0.21768948 | -2.180428435 |
| ENSMUSG00000082873 | Gm15367       | -0.561582479 | -0.51458606  | -0.81509442 | -3.481337547 |
| ENSMUSG00000084331 | Gm8163        | -0.780784792 | -0.510373932 | 0.064792949 | -3.701692831 |
| ENSMUSG00000051373 | Ppapdc3       | -2.389800017 | -0.509304319 | -0.94835854 | -0.277148477 |
| ENSMUSG00000081614 | Gm9436        | -0.032200558 | -0.50741168  | -0.2733008  | -2.806437489 |
| ENSMUSG00000048970 | C1galt1c1     | -2.128525013 | -0.505235308 | -3.20770507 | -1.998634345 |
| ENSMUSG00000083019 | Gm6222        | -0.549249508 | -0.504268812 | -0.39338423 | -2.332889695 |
| ENSMUSG00000031760 | Mt3           | -3.233468468 | -0.494262789 | -0.20680145 | -0.389313134 |
| ENSMUSG00000057969 | Sema3b        | -0.441612966 | -0.493377142 | -0.2620227  | -2.139873076 |
| ENSMUSG00000025860 | Xiap          | 0.040257188  | -0.486199844 | 0.029987196 | -2.017917542 |
| ENSMUSG00000081803 | Gm15282       | -1.747162599 | -0.478447012 | -1.69915107 | -3.781939312 |
| ENSMUSG00000069986 | Gm8054        | -4.558746966 | -0.477937352 | -5.99638382 | 0.049175401  |
| ENSMUSG00000063488 | Zfp167        | -0.133655338 | -0.477757974 | -0.56288772 | -2.043832364 |
| ENSMUSG00000043587 | Acpl2         | -0.554879425 | -0.474878192 | -0.3910961  | -2.103911521 |
| ENSMUSG00000010064 | Slc38a3       | -2.90316908  | -0.470487192 | -1.85314602 | -1.24729364  |
| ENSMUSG00000019478 | Rab4a         | -0.471997896 | -0.469969283 | -0.18979606 | -2.139889564 |



|                    |               |              |              |             |              |
|--------------------|---------------|--------------|--------------|-------------|--------------|
| ENSMUSG00000079508 | Apoo          | -0.654533221 | -0.469807762 | -0.33259348 | -2.678699134 |
| ENSMUSG00000032062 | 2310030G06Rik | -0.350785731 | -0.468189609 | -0.30256403 | -2.21648504  |
| ENSMUSG00000080847 | Gm4773        | 0.016248666  | -0.467085401 | 0.207602235 | -2.934568338 |
| ENSMUSG00000032392 | Parp16        | -0.605492758 | -0.459148936 | -0.24905231 | -2.33468283  |
| ENSMUSG00000032314 | Etfa          | -0.60519471  | -0.456522351 | -0.66178001 | -2.662989809 |
| ENSMUSG00000074501 | Gm5612        | -0.876057907 | -0.456205858 | -0.08093461 | -6.647953354 |
| ENSMUSG00000084079 | Gm11631       | -3.04397503  | -0.453398905 | -4.01484107 | -1.98814295  |
| ENSMUSG00000071708 | Sms           | -0.515204876 | -0.452689392 | -0.4704621  | -2.005481891 |
| ENSMUSG00000034487 | Kdelc2        | -0.22329026  | -0.449414894 | -0.14986388 | -2.232633676 |
| ENSMUSG00000057626 | Gm5621        | -0.316117759 | -0.449235906 | -0.06089901 | -2.172984697 |
| ENSMUSG00000066771 | Gm5614        | -0.077497749 | -0.448699377 | -0.05816042 | -4.792458618 |
| ENSMUSG00000031059 | Ndufb11       | -0.561278331 | -0.442037013 | -0.26351911 | -2.232136729 |
| ENSMUSG00000081570 | Gm12192       | -2.131587932 | -0.43903999  | -0.73650486 | 0.269600576  |
| ENSMUSG00000090802 | Gm8074        | -2.281816925 | -0.438154431 | -2.11977146 | 0.050598877  |
| ENSMUSG00000019933 | 2310015B20Rik | -2.464405942 | -0.434693579 | -1.20305212 | -3.140830688 |
| ENSMUSG00000025794 | Rpl14         | -0.086678445 | -0.430161156 | -0.08981675 | -2.330654896 |
| ENSMUSG00000051851 | Cxx1c         | -0.424957962 | -0.430016621 | -0.01223492 | -2.527090502 |
| ENSMUSG00000025656 | Arhgef9       | -0.805884382 | -0.428988674 | -0.92832306 | -2.046615163 |
| ENSMUSG00000083554 | Gm6645        | 0.539528126  | -0.427527521 | -0.45543288 | -2.246304668 |
| ENSMUSG00000083200 | Gm15066       | 0.287354448  | -0.419889097 | -0.12938495 | -3.74774599  |
| ENSMUSG00000090483 | Tmem29        | -0.069257949 | -0.419043119 | 0.265322329 | -2.085634803 |
| ENSMUSG00000010047 | Hyal2         | -0.541640181 | -0.41689653  | -0.05756944 | -2.03371471  |
| ENSMUSG00000031245 | Hmgn5         | -0.289472356 | -0.416881486 | -0.63205041 | -2.061689989 |
| ENSMUSG00000040146 | Rgl3          | -0.298701668 | -0.416330192 | 0.064270571 | -2.027528486 |
| ENSMUSG00000032121 | Tmem218       | -0.135282467 | -0.415661168 | -0.22201208 | -2.077692506 |
| ENSMUSG00000078982 | Gm11025       | -2.316762674 | -0.414060833 | -1.45187239 | -2.146172215 |
| ENSMUSG00000027470 | Mylk2         | -2.048127881 | -0.409296771 | -1.2323936  | 0.014470286  |
| ENSMUSG00000084060 | Gm16412       | 0.680708394  | -0.406482506 | 0.399862131 | -3.440425415 |
| ENSMUSG00000031246 | Sh3bgrl       | -0.001227912 | -0.405733092 | -0.29423748 | -2.03329607  |
| ENSMUSG00000019359 | Gdpd2         | -1.181033575 | -0.403219754 | -0.28590412 | -2.54008245  |
| ENSMUSG00000031320 | Rps4x         | -0.141792107 | -0.400633357 | -0.24816153 | -2.076515372 |
| ENSMUSG00000082498 | Gm12937       | -2.681713115 | -0.398804201 | -0.81181094 | -0.176026496 |
| ENSMUSG00000066475 | Gm10268       | -2.145061341 | -0.390807253 | -1.9199445  | 0.361798153  |
| ENSMUSG00000009927 | Rps25         | -0.165750343 | -0.390127129 | -0.24631175 | -2.35546402  |
| ENSMUSG00000045775 | Slc16a5       | -2.546961574 | -0.388956909 | -1.48157688 | 0.16493526   |
| ENSMUSG00000031134 | RbmX          | -0.394081621 | -0.388523025 | -0.36349482 | -2.074892911 |
| ENSMUSG00000084185 | Rplp1-ps1     | -0.569979829 | -0.384310592 | -0.45579992 | -5.254401298 |
| ENSMUSG00000048592 | Gm5946        | -0.08832179  | -0.382973116 | -0.40922601 | -2.019557785 |
| ENSMUSG00000032320 | Rcn2          | -0.161507861 | -0.382709264 | -0.20462488 | -2.162246485 |
| ENSMUSG00000035967 | Ddx26b        | -0.454590187 | -0.381924796 | -0.35637561 | -2.114523334 |
| ENSMUSG00000044037 | Als2cl        | -0.658689641 | -0.377674522 | -0.10766582 | -2.101622774 |
| ENSMUSG00000082115 | Gm15490       | 0.407782073  | -0.375159054 | -2.25264303 | 0.646806843  |
| ENSMUSG00000053040 | Aph1c         | 0.085496683  | -0.371321506 | -0.00620269 | -2.145395328 |
| ENSMUSG00000082650 | Gm15358       | -2.250012459 | -0.368892462 | -0.65950188 | 0.245254539  |
| ENSMUSG00000081896 | Gm5389        | -0.565097904 | -0.366967106 | -0.5737731  | -2.686998081 |
| ENSMUSG00000080862 | Gm14523       | -3.782920803 | -0.365281082 | -0.19935925 | -1.85476302  |
| ENSMUSG00000032340 | Neo1          | -0.59466408  | -0.359339397 | -0.19319341 | -2.119262698 |
| ENSMUSG00000032422 | Snx14         | -0.339867061 | -0.357464686 | -0.17896379 | -2.116780587 |

|                    |               |              |              |             |              |
|--------------------|---------------|--------------|--------------|-------------|--------------|
| ENSMUSG00000030785 | Cox6a2        | -2.001458871 | -0.355357854 | -1.20065086 | 0.00920716   |
| ENSMUSG00000058914 | C1qtnf3       | -2.97862709  | -0.345813798 | -1.2178783  | -0.085697623 |
| ENSMUSG00000000167 | Pih1d2        | 0.127613557  | -0.340472662 | -0.64380078 | -2.832593179 |
| ENSMUSG00000083823 | Amd-ps1       | 0.399520931  | -0.320202077 | 0.054827957 | -2.668937288 |
| ENSMUSG00000080758 | Gm5392        | 0.033981955  | -0.31861839  | -0.30497784 | -4.908342178 |
| ENSMUSG00000083621 | Gm14586       | -0.306832683 | -0.305945261 | -0.26514835 | -2.532324898 |
| ENSMUSG00000083346 | Gm8260        | -0.001604296 | -0.301131032 | 0.06678178  | -4.532772016 |
| ENSMUSG00000007815 | Rhoa          | -0.152759421 | -0.299073025 | -0.16718924 | -2.013408155 |
| ENSMUSG00000032558 | Nphp3         | -0.387593481 | -0.294388785 | -0.18088696 | -2.160369181 |
| ENSMUSG00000084186 | Rpl36-ps10    | -0.21600727  | -0.294159155 | -0.78879266 | -4.220438308 |
| ENSMUSG00000048709 | Gm8666        | -0.124041281 | -0.293994925 | -0.05331382 | -2.174301027 |
| ENSMUSG00000080740 | Gm15013       | -0.018718302 | -0.290554985 | -0.37403804 | -5.581955354 |
| ENSMUSG00000081164 | Gm8722        | -0.466787231 | -0.289700598 | -0.34031249 | -2.023383089 |
| ENSMUSG00000084193 | Gm6823        | 0.586143336  | -0.28712705  | 0.181650918 | -2.410867951 |
| ENSMUSG00000083250 | Gm5403        | -0.667159276 | -0.286109518 | 0.00811173  | -3.078923468 |
| ENSMUSG00000074408 | -             | -0.612769318 | -0.276450937 | -0.38614581 | -2.346172547 |
| ENSMUSG00000032403 | 2300009A05Rik | -0.365135658 | -0.27198136  | -0.1922369  | -2.677907578 |
| ENSMUSG00000080777 | Gm15365       | -0.290433234 | -0.260307789 | -0.52177343 | -2.574182495 |
| ENSMUSG00000083375 | Gm15057       | -0.747404866 | -0.258934261 | -1.02458068 | -2.94363502  |
| ENSMUSG00000024471 | Myot          | -2.621524725 | -0.253097649 | -1.90418361 | 0.529783611  |
| ENSMUSG00000081898 | Gm5754        | 0.481686053  | -0.248322819 | -0.61732135 | -2.391077546 |
| ENSMUSG00000049536 | Tceal1        | -0.481321535 | -0.247492761 | -0.60910589 | -2.050608595 |
| ENSMUSG00000001661 | Hoxc6         | -2.093948885 | -0.246625628 | -2.5459456  | -0.45361161  |
| ENSMUSG00000045519 | Zfp560        | -0.271548105 | -0.245040211 | -0.46627888 | -2.649426214 |
| ENSMUSG00000016239 | Lonrf3        | -0.547201414 | -0.243124395 | -0.30660229 | -2.652057207 |
| ENSMUSG00000050394 | Armcx6        | -0.438282438 | -0.232023936 | -0.46604489 | -2.080458577 |
| ENSMUSG00000081763 | Gm9435        | 0.099394383  | -0.231922577 | -0.13112082 | -3.157931374 |
| ENSMUSG00000031355 | Arhgap6       | -0.05890942  | -0.226924487 | -0.09981814 | -2.046726239 |
| ENSMUSG00000032491 | Nradd         | -0.306873917 | -0.226603529 | 0.296403111 | -2.143089584 |
| ENSMUSG00000081456 | Gm7781        | -0.513309418 | -0.225553709 | -0.7323556  | -3.52684291  |
| ENSMUSG00000043219 | Hoxa6         | -2.618302232 | -0.224460844 | -1.57254965 | 0.105331379  |
| ENSMUSG00000081263 | Gm14859       | 0.069897202  | -0.223244418 | 0.058968533 | -3.692887601 |
| ENSMUSG00000083016 | Gm11703       | -1.885001438 | -0.220031548 | -2.39430571 | -0.142389242 |
| ENSMUSG00000087626 | Gm15050       | 0.298694773  | -0.214873027 | -1.83100485 | -2.417310877 |
| ENSMUSG00000082682 | Gm15349       | -2.193942463 | -0.214320421 | 0.302500686 | 0.172197333  |
| ENSMUSG00000084031 | Gm7416        | 0.137298155  | -0.214212984 | -0.23089327 | -2.294650081 |
| ENSMUSG00000083288 | Csnk2a1-ps    | 0.206627876  | -0.203427004 | -0.33676357 | -4.636097206 |
| ENSMUSG00000037315 | Phf16         | 0.176052855  | -0.203418847 | -0.08257236 | -2.150921348 |
| ENSMUSG00000082076 | Gm8659        | -0.731703918 | -0.198457501 | -0.64040487 | -2.043984064 |
| ENSMUSG00000080974 | Gm9009        | -0.272804411 | -0.197469219 | -0.40222581 | -7.441065663 |
| ENSMUSG00000043929 | Klhl15        | 0.283523053  | -0.189823824 | -0.10426967 | -2.061592683 |
| ENSMUSG00000083982 | Gm14650       | -0.123656669 | -0.180963647 | -0.43331656 | -4.89386285  |
| ENSMUSG00000042293 | Gm5617        | -0.753270685 | -0.178611718 | -0.41715928 | -2.375526488 |
| ENSMUSG00000081897 | Gm15067       | 0.270387177  | -0.169916759 | 0.41650261  | -4.647723196 |
| ENSMUSG00000082625 | Gm15204       | 0.157937032  | -0.16745124  | -0.24859921 | -2.256064876 |
| ENSMUSG00000031380 | Figf          | -0.054132835 | -0.164944773 | 0.349318525 | -2.282818018 |
| ENSMUSG00000083736 | Gm6039        | 0.148129828  | -0.159461695 | -0.19768436 | -2.012174714 |
| ENSMUSG00000073131 | Vma21         | -0.130138778 | -0.154246102 | -0.05813548 | -2.193414331 |

|                    |               |              |              |             |              |
|--------------------|---------------|--------------|--------------|-------------|--------------|
| ENSMUSG00000032251 | Irak1bp1      | 0.415848952  | -0.151885722 | 0.164516195 | -2.010557515 |
| ENSMUSG00000025271 | Pfkfb1        | -0.55533096  | -0.148798706 | -0.46861036 | -2.398711854 |
| ENSMUSG00000020990 | Cdk11         | -1.350945625 | -0.142466636 | -2.29778934 | -0.298275174 |
| ENSMUSG00000062270 | Morf4l1       | 0.07289968   | -0.13911415  | -0.15822464 | -2.6741639   |
| ENSMUSG00000063018 | 2010204K13Rik | -0.395149788 | -0.134382354 | -0.22645218 | -2.328284299 |
| ENSMUSG00000082549 | Gm14813       | 0.113538729  | -0.130301137 | 0.003242033 | -2.735688966 |
| ENSMUSG00000044550 | Tceal3        | -0.469358376 | -0.121849829 | -0.62916017 | -2.447160016 |
| ENSMUSG00000061808 | Tr            | -3.033933911 | -0.107024412 | -6.86838502 | -0.107024412 |
| ENSMUSG00000082222 | Gm14865       | -0.597825585 | -0.095109178 | -0.95199241 | -2.278163556 |
| ENSMUSG00000031214 | Ophn1         | -0.068859124 | -0.092910531 | -0.44197008 | -2.491747502 |
| ENSMUSG00000082955 | Gm8036        | 0.549045327  | -0.092442253 | 0.368902969 | -2.907030842 |
| ENSMUSG00000081848 | Gm14925       | -0.056562033 | -0.087499792 | -0.66061998 | -3.493630041 |
| ENSMUSG00000040867 | Begain        | -2.125362248 | -0.07867882  | 0.180050346 | -0.215576854 |
| ENSMUSG00000071083 | Gm10311       | -0.88241812  | -0.076736406 | -2.56376363 | -0.013968548 |
| ENSMUSG00000082144 | Gm12788       | -2.095913735 | -0.076507129 | 0.478935969 | -0.998816923 |
| ENSMUSG00000090771 | -             | -0.254626505 | -0.075651402 | 0.939540409 | -2.481860564 |
| ENSMUSG00000025141 | Myadml2       | -3.144679839 | -0.071299256 | -1.49204763 | -0.453877262 |
| ENSMUSG00000079593 | Gm14597       | -0.055999027 | -0.06514814  | 0.228458594 | -2.407690006 |
| ENSMUSG00000080788 | Gm7841        | 0.113544764  | -0.064262307 | -0.06703714 | -7.172440227 |
| ENSMUSG00000089996 | Tmsb15b2      | -0.43742106  | -0.063269793 | -1.80926008 | -2.315257296 |
| ENSMUSG00000084303 | Gm8216        | -0.139693469 | -0.057600397 | -0.39202693 | -2.655015473 |
| ENSMUSG00000081972 | Gm16397       | -1.552837523 | -0.057521674 | -0.02441386 | -3.14232034  |
| ENSMUSG00000025265 | Fgd1          | -0.180619599 | -0.041754608 | -0.00407708 | -2.070506191 |
| ENSMUSG00000083911 | Gm4342        | -0.107871777 | -0.038137876 | -0.01665842 | -2.962784435 |
| ENSMUSG00000079435 | Rpl36a        | -0.11558513  | -0.037827731 | 0.066012346 | -2.164595305 |
| ENSMUSG00000081142 | Gm15497       | -0.600699934 | -0.032151136 | -2.71427319 | -1.133207419 |
| ENSMUSG00000059252 | Tpt1-ps5      | -0.205081461 | -0.029751162 | -0.29623324 | -2.597652173 |
| ENSMUSG00000000049 | Apoh          | -3.779077105 | -0.023651245 | -3.7053999  | 0.163007157  |
| ENSMUSG00000071680 | Gm7123        | 0.389862434  | -0.018457708 | -0.23808712 | -3.72975308  |
| ENSMUSG00000039661 | Dusp26        | -3.238101355 | -0.014143475 | -2.28428688 | -0.757142005 |
| ENSMUSG00000081762 | Gm13738       | -2.507930953 | -0.003006807 | -1.97856583 | -0.658365057 |
| ENSMUSG00000003053 | Cyp2c29       | -1.42618423  | 0            | -5.5996152  | 0            |
| ENSMUSG00000032081 | Apoc3         | -1.594171106 | 0            | -3.77487695 | 0.128650929  |
| ENSMUSG00000061958 | Gm14851       | -2.392070082 | 0            | -4.64740864 | 0            |
| ENSMUSG00000063751 | Gm13939       | -2.453924555 | 0            | -4.54858439 | 0.197383574  |
| ENSMUSG00000066252 | -             | -1.327399946 | 0            | -5.38349237 | 0            |
| ENSMUSG00000069324 | Gm5096        | -1.996489985 | 0            | -4.61486641 | 0            |
| ENSMUSG00000073290 | Gm10490       | -2.680243779 | 0            | -2.14997348 | 0            |
| ENSMUSG00000082404 | Gm14799       | -1.44647328  | 0            | -2.27292304 | 0            |
| ENSMUSG00000083434 | Gm12760       | -3.494197974 | 0            | -3.49419797 | 0.257620164  |
| ENSMUSG00000083446 | Gm12826       | -4.805893116 | 0            | -3.13307685 | 0            |
| ENSMUSG00000090372 | -             | -2.148543695 | 0            | -2.58868811 | 0            |
| ENSMUSG00000092015 | -             | -2.566094235 | 0            | -2.56609424 | 0.151482187  |
| ENSMUSG00000062380 | Tubb3         | 0.101193143  | 0.000673763  | 0.40543701  | -2.021630303 |
| ENSMUSG00000001986 | Gria3         | 0.052763954  | 0.016250341  | 0.138756785 | -2.177911567 |
| ENSMUSG00000025991 | Cps1          | -1.170892885 | 0.025776392  | -7.3752436  | 0            |
| ENSMUSG00000071748 | Gm14698       | -0.19858985  | 0.027621291  | -0.08057758 | -2.039309933 |
| ENSMUSG00000058192 | Zfp846        | -0.402559835 | 0.028420997  | -0.5873734  | -2.474549663 |

|                    |               |              |             |             |              |
|--------------------|---------------|--------------|-------------|-------------|--------------|
| ENSMUSG00000082623 | Gm15493       | -0.13438224  | 0.029892712 | 0.084836479 | -2.221084545 |
| ENSMUSG00000083595 | Gm9200        | -0.277634012 | 0.039099222 | -0.38371707 | -2.380992582 |
| ENSMUSG00000079418 | Atg4a         | 0.259560114  | 0.041767374 | -0.28473603 | -2.249050914 |
| ENSMUSG00000081308 | Gm14480       | -0.205038122 | 0.043195038 | -0.3652889  | -3.361009949 |
| ENSMUSG00000079480 | Pin4          | 0.075247701  | 0.044410178 | -0.04079216 | -2.399845472 |
| ENSMUSG00000047746 | Fbxo40        | -2.029217505 | 0.045358106 | -1.53856638 | 0.39181074   |
| ENSMUSG00000025898 | Cwf1912       | 0.421977581  | 0.05582588  | -0.20253257 | -2.048887309 |
| ENSMUSG00000048758 | Rpl29         | 0.217181934  | 0.0612445   | 0.149501195 | -7.690192635 |
| ENSMUSG00000082413 | Gm13401       | -0.064624215 | 0.063720479 | -0.42678137 | -2.786447377 |
| ENSMUSG00000083971 | Gm5943        | 0.150546587  | 0.071618082 | -0.25130022 | -2.31212215  |
| ENSMUSG00000035540 | Gc            | -2.010368093 | 0.082519073 | -3.04378647 | 0.078578959  |
| ENSMUSG00000031105 | Slc25a14      | -0.168963751 | 0.088793162 | -0.03796227 | -2.420696117 |
| ENSMUSG00000059481 | Plg           | -1.344033092 | 0.097845788 | -6.377723   | 0.095101562  |
| ENSMUSG00000081568 | Gm15032       | -0.344641408 | 0.104969632 | -0.30478736 | -5.709297402 |
| ENSMUSG00000081473 | Gm4853        | -0.497611395 | 0.112066621 | -0.35525133 | -2.117020067 |
| ENSMUSG00000082336 | Gm8401        | 0.401525094  | 0.112599281 | 0.087600855 | -2.385448435 |
| ENSMUSG00000085116 | Gm2735        | -0.025437844 | 0.137285778 | -0.20161357 | -8.00136662  |
| ENSMUSG00000082653 | Gm15897       | -2.581741748 | 0.153248367 | -0.12763165 | -0.922759061 |
| ENSMUSG00000033831 | Fgb           | -2.325089901 | 0.158741597 | -2.3250899  | 0            |
| ENSMUSG00000081217 | Gm15268       | 0.714576335  | 0.167093839 | 0.297888659 | -3.143523878 |
| ENSMUSG00000066592 | Gm7589        | -0.106930586 | 0.173631822 | -0.18232135 | -2.743745711 |
| ENSMUSG00000082032 | Gm12271       | -2.093196009 | 0.174916596 | -1.54299976 | -2.135748776 |
| ENSMUSG00000083166 | Gm8648        | 0.085851829  | 0.175182414 | -0.11370327 | -7.139234129 |
| ENSMUSG00000084125 | Gm8757        | 0.02278315   | 0.175443336 | -0.84356182 | -2.296084792 |
| ENSMUSG00000031146 | Plp2          | 0.146827413  | 0.176161522 | 0.101645857 | -2.049329329 |
| ENSMUSG00000085226 | Gm7855        | 1.463500854  | 0.181397949 | -0.92696585 | -2.47432819  |
| ENSMUSG00000070531 | Wfdc6b        | -2.143336463 | 0.2020214   | -0.95910901 | -0.017255102 |
| ENSMUSG00000083362 | Gm8606        | 0.122518317  | 0.205370644 | -0.04995513 | -4.667545882 |
| ENSMUSG00000001134 | Uxt           | 0.139556803  | 0.207863672 | 0.124733097 | -2.107380569 |
| ENSMUSG00000084216 | Gm7973        | 0.356789234  | 0.216049728 | 0.407707821 | -2.754139244 |
| ENSMUSG00000081222 | Gm15173       | -0.171057352 | 0.229267455 | 0.163820456 | -5.084199071 |
| ENSMUSG00000081739 | Mdm4-ps       | 0.262125606  | 0.233352997 | 0.107019808 | -2.177082902 |
| ENSMUSG00000082776 | Gm7061        | 0.167555355  | 0.252413283 | 0.106825537 | -3.298422386 |
| ENSMUSG00000074336 | Apoc4         | -2.069840995 | 0.255249335 | -4.0716708  | 0.266141268  |
| ENSMUSG00000082488 | 1700119I11Rik | -5.2367995   | 0.264945644 | -2.2554548  | 0.712945956  |
| ENSMUSG00000081748 | Gm14870       | 0.122146635  | 0.272830396 | -0.96491127 | -3.339369474 |
| ENSMUSG00000081159 | Gm6023        | 0.125275373  | 0.276849264 | 0           | -2.798343235 |
| ENSMUSG00000082660 | Gm14612       | -0.360067554 | 0.281145862 | -0.45928008 | -2.006553728 |
| ENSMUSG00000032083 | Apoa1         | -3.386497823 | 0.282971117 | -4.66598799 | 0            |
| ENSMUSG00000045694 | Gm4997        | 0.27481558   | 0.31616157  | -0.4270198  | -5.452977366 |
| ENSMUSG00000083551 | Gm14516       | 0.98023305   | 0.329257601 | 0.059480099 | -2.428927591 |
| ENSMUSG00000081613 | Gm12109       | -3.953891212 | 0.329338334 | -5.9892391  | 0.344618325  |
| ENSMUSG00000023235 | Cel25         | -2.241708098 | 0.336036745 | -1.17998666 | 1.053292882  |
| ENSMUSG00000067653 | Ankrd23       | -2.437454091 | 0.34276043  | -1.91057811 | 0.812060169  |
| ENSMUSG00000049493 | Pls1          | 0.313369058  | 0.364654677 | -0.06961245 | -2.077759689 |
| ENSMUSG00000082912 | Gm8770        | 0.777572712  | 0.396216945 | 0.482709123 | -2.11497314  |
| ENSMUSG00000090602 | Gm5611        | 0.362406326  | 0.423779908 | 0.172851718 | -2.010968058 |
| ENSMUSG00000081350 | Gm5388        | 0.17912022   | 0.430436227 | 0.204176521 | -3.565997339 |

|                    |               |              |             |             |              |
|--------------------|---------------|--------------|-------------|-------------|--------------|
| ENSMUSG00000085898 | Gm6689        | -3.328514498 | 0.459600535 | -4.77355265 | 0.258909621  |
| ENSMUSG00000091804 | -             | -2.462692219 | 0.461155188 | -0.44934826 | -0.012805229 |
| ENSMUSG00000025386 | Pde6g         | -4.271780703 | 0.467183959 | -4.40431391 | -0.621067719 |
| ENSMUSG00000082054 | Psm6-ps       | 0.000602425  | 0.476030757 | 0.298596696 | -2.201388011 |
| ENSMUSG00000080774 | Gm9143        | 0.267744144  | 0.479834931 | -1.10760115 | -3.229085494 |
| ENSMUSG00000083906 | Gm15186       | 0.381774644  | 0.494099278 | -0.05950943 | -2.520931484 |
| ENSMUSG00000063816 | Gm4987        | -0.229869888 | 0.509332075 | 0.362121988 | -2.261684227 |
| ENSMUSG00000081331 | Gm15151       | -0.544655911 | 0.511729134 | 0.34866974  | -3.735359702 |
| ENSMUSG00000061486 | Gm5161        | 0.096255643  | 0.518795305 | 0.51621012  | -3.875806622 |
| ENSMUSG00000090331 | Gm17199       | -3.576002045 | 0.545902039 | -3.57600205 | 0.577286461  |
| ENSMUSG00000082360 | Gm8814        | 0.050081493  | 0.548543628 | -0.15348157 | -5.096490321 |
| ENSMUSG00000082464 | Rab9b-ps1     | 0.186363385  | 0.586770973 | -0.54551465 | -4.618262218 |
| ENSMUSG00000036216 | Leap2         | -2.978896968 | 0.594933535 | -1.34583349 | 0            |
| ENSMUSG00000084842 | Pabpc1l2b-ps  | -0.711640294 | 0.596578773 | -3.14902895 | -0.45372189  |
| ENSMUSG00000081933 | Gm14767       | 0.40704999   | 0.601421151 | -0.03940415 | -2.143262751 |
| ENSMUSG00000066829 | Zfp810        | 0.436991364  | 0.601862316 | 0.113544379 | -2.155302804 |
| ENSMUSG00000030359 | Pzp           | -1.212531987 | 0.607998317 | -4.00169179 | 1.331731662  |
| ENSMUSG00000082810 | Gm8682        | 0.433389835  | 0.621175907 | 0.432104746 | -4.536705696 |
| ENSMUSG00000070308 | -             | -0.059819951 | 0.62504565  | -0.08790772 | -3.557756882 |
| ENSMUSG00000082669 | Gm5393        | 0.02664578   | 0.638106469 | -0.09949571 | -3.103628559 |
| ENSMUSG00000028356 | Ambp          | -3.471297868 | 0.656880733 | -5.00100772 | 0.264022314  |
| ENSMUSG00000084142 | Gm9103        | 0.421009782  | 0.659970317 | 0.364943092 | -4.546755841 |
| ENSMUSG00000081373 | Gm16436       | 0.53831623   | 0.669672311 | 0.19299385  | -2.455425142 |
| ENSMUSG00000081084 | Gm5638        | 0.469841088  | 0.696081206 | 0.175224084 | -4.503625914 |
| ENSMUSG00000083908 | Gm6447        | -1.006097589 | 0.723040835 | 0.301092072 | -2.913838632 |
| ENSMUSG00000044794 | 9330133O14Rik | 0.451589552  | 0.737524835 | -0.09227069 | -2.242656424 |
| ENSMUSG00000081678 | Gm12959       | -2.665222686 | 0.738453875 | -0.73583405 | 0.447074736  |
| ENSMUSG00000078875 | Gm14419       | -1.672456002 | 0.747966162 | -2.69871537 | 0.224530884  |
| ENSMUSG00000079538 | -             | -2.501923147 | 0.764799835 | 1.903265182 | -0.100535829 |
| ENSMUSG00000044820 | AY074887      | 0.410819884  | 0.771690659 | -2.97195749 | -0.612228868 |
| ENSMUSG00000087239 | Gm7613        | 0.63343204   | 0.808783604 | 0.378710746 | -2.546455149 |
| ENSMUSG00000078893 | -             | -1.750585162 | 0.85384923  | -3.61036312 | 0.03457612   |
| ENSMUSG00000028307 | Aldob         | -4.398255936 | 0.881525552 | -3.87922384 | -0.154845038 |
| ENSMUSG00000084361 | Gm8202        | 0.560289894  | 0.895187266 | 0.280635621 | -4.074961816 |
| ENSMUSG00000082337 | Gm14723       | 0.738772854  | 0.920923634 | -0.32290984 | -2.730418237 |
| ENSMUSG00000022868 | Ahsg          | -3.559907096 | 0.961243213 | -3.77861322 | 0.63909846   |
| ENSMUSG00000026418 | Tnni1         | -2.686862781 | 0.965117106 | -2.40532234 | 0.737476044  |
| ENSMUSG00000064179 | Tnnt1         | -3.085034066 | 1.008123887 | -2.08073576 | 1.24711215   |
| ENSMUSG00000082954 | Gm15504       | -1.197407443 | 1.092260937 | -2.155937   | -1.568892786 |
| ENSMUSG00000081008 | Gm13314       | -0.86973763  | 1.121375712 | -2.28007477 | 0.719428914  |
| ENSMUSG00000082541 | Gm9095        | -0.441121247 | 1.189385628 | 1.94830501  | -2.725268189 |
| ENSMUSG00000091406 | -             | -2.785975242 | 1.215430102 | -2.32946578 | 0            |
| ENSMUSG00000081230 | Gm9097        | -0.441278519 | 1.26309745  | 1.946169892 | -2.725586211 |
| ENSMUSG00000049641 | Vgll2         | -1.817140232 | 1.337711092 | -5.91181273 | 0.823046589  |
| ENSMUSG00000081030 | Gm12704       | -2.427698982 | 1.360483167 | -4.62012655 | 0.750961292  |
| ENSMUSG00000025172 | Ankrd2        | -2.810165681 | 1.369137006 | -2.96308473 | 1.311357792  |
| ENSMUSG00000062540 | -             | -0.339623217 | 1.506344974 | -2.73724423 | 1.1529213    |
| ENSMUSG00000078437 | -             | -0.339623217 | 1.506344974 | -2.73724423 | 1.1529213    |

|                    |           |              |              |             |              |
|--------------------|-----------|--------------|--------------|-------------|--------------|
| ENSMUSG00000086495 | Gm13778   | -2.095565931 | 1.525758064  | -2.55213752 | 1.295115744  |
| ENSMUSG00000080796 | Gm9159    | -2.507875832 | 1.539535311  | -2.99031592 | 0.036083516  |
| ENSMUSG00000081670 | Gm15697   | -1.173129363 | 1.623147766  | -2.49808901 | 1.938006265  |
| ENSMUSG00000082204 | Gm7722    | 0.688430709  | 1.638380346  | -0.37278172 | -3.597065631 |
| ENSMUSG00000078370 | Gm6316    | -0.868929053 | 1.686684738  | -2.94470052 | -1.27601514  |
| ENSMUSG00000091786 | Gm8425    | -2.20947575  | 1.992109962  | -0.19780654 | 1.203637886  |
| ENSMUSG00000081136 | Gm12990   | 5.224687237  | -4.135244152 | -0.47130608 | -4.670315341 |
| ENSMUSG00000069475 | Gm6020    | 2.396233218  | -4.074102919 | 4.233717594 | -1.588545615 |
| ENSMUSG00000084897 | Gm14226   | 8.152685958  | -3.556751975 | -0.0098088  | -0.910929695 |
| ENSMUSG00000073028 | Igkv4-71  | 1.009321217  | -2.052239182 | -0.54285217 | 2.122171422  |
| ENSMUSG00000060566 | Rpl21-ps3 | 2.193704648  | -1.959979025 | -0.18717611 | -2.329435658 |
| ENSMUSG00000084069 | Gm12306   | 0            | -1.892080109 | 2.386181872 | -2.324241602 |
| ENSMUSG00000084149 | Gm12944   | -2.293099616 | -1.440132149 | -2.98862622 | 4.203293497  |
| ENSMUSG00000040759 | Cmtm5     | -0.357762136 | -1.110610465 | 3.001628715 | -3.381567567 |
| ENSMUSG00000079255 | -         | 1.479992479  | -0.845456359 | 2.139908281 | -2.327818663 |
| ENSMUSG00000063821 | Dupd1     | -3.326984646 | -0.32496264  | -1.44242435 | 3.974789015  |
| ENSMUSG00000090274 | -         | -0.720736589 | 0            | -2.21000161 | 6.364672227  |
| ENSMUSG00000005681 | Apoa2     | -5.781091087 | 0.003435702  | -6.48812291 | 2.332090105  |
| ENSMUSG00000091315 | Gm17214   | -2.516747906 | 0.321318278  | 4.983119625 | 0.544529058  |
| ENSMUSG00000075515 | -         | -2.49613684  | 0.54204441   | -1.64072952 | 4.192174359  |
| ENSMUSG00000034339 | Gm5689    | -2.386585587 | 0.566364467  | -1.13889313 | 2.145822589  |
| ENSMUSG00000081543 | Gm12733   | -3.495989875 | 0.97870126   | -1.35260035 | 2.566201321  |
| ENSMUSG00000028001 | Fga       | -4.399133505 | 1.333103198  | -0.36925825 | 3.37546009   |
| ENSMUSG00000082816 | Gm11953   | -6.623912965 | 1.357509629  | -7.08614889 | 2.08773402   |
| ENSMUSG00000006179 | Prss16    | -3.508860272 | 1.364002984  | -1.00715645 | 2.050650982  |
| ENSMUSG00000033860 | Fgg       | -3.693072834 | 1.736897952  | -1.23686485 | 2.024745831  |
| ENSMUSG00000027220 | Syt13     | -2.649251942 | 1.808316282  | -0.95011631 | 2.588903431  |
| ENSMUSG00000083126 | Gm14109   | -2.314686681 | 2.242777868  | -1.18193395 | 2.573849575  |
| ENSMUSG00000060459 | Kng2      | -1.890374226 | 2.411010386  | -2.86744541 | -0.479452407 |
| ENSMUSG00000079281 | -         | -1.264759096 | 2.582902786  | -3.03087456 | 0            |
| ENSMUSG00000022875 | Kng1      | -2.77056917  | 2.853417442  | -4.37331729 | 0.889293597  |
| ENSMUSG00000023083 | H2-M10.2  | -4.179878086 | 2.856081357  | 0.152850097 | 2.874633707  |
| ENSMUSG00000025014 | Dntt      | -5.310582552 | 3.006877492  | -1.78901568 | 2.480895726  |
| ENSMUSG00000033027 | Klrc3     | 0.692401549  | 3.244509921  | -2.19572828 | 2.223291001  |
| ENSMUSG00000073375 | Lrrc30    | -5.248109495 | 3.546380158  | -4.23133163 | 2.917964808  |
| ENSMUSG00000080999 | Gm11336   | -2.830768573 | 4.031068718  | -2.4245916  | 0.636445048  |
| ENSMUSG00000013936 | Myl2      | -4.40414698  | 5.310478119  | -7.03367226 | 6.093366324  |
| ENSMUSG00000061615 | Hist1h2ab | -1.943433784 | 5.849693418  | -3.25670859 | 2.332469068  |
| ENSMUSG00000083993 | Gm14398   | -5.510572951 | 6.353901479  | -4.96269003 | 7.388702334  |
| ENSMUSG00000090265 | Gm9550    | 2.211156162  | -1.94949703  | -0.58012908 | -1.906393746 |
| ENSMUSG00000067224 | Gm3695    | -0.177287651 | -1.942273497 | 4.730402311 | 1.099028495  |
| ENSMUSG00000082271 | Gm12217   | 2.53497423   | -1.620318868 | 0.092502327 | -0.263097203 |
| ENSMUSG00000013611 | Snx31     | 4.336935102  | -1.452819996 | -1.27027887 | -0.132280443 |
| ENSMUSG00000066714 | Gm8062    | -0.514899204 | -1.344838188 | -0.69611736 | 2.128388164  |
| ENSMUSG00000076548 | Igkv4-69  | 2.311525401  | -1.044217126 | -0.95819166 | 0.288384388  |
| ENSMUSG00000090941 | Gm17212   | -1.153309301 | -1.03657153  | 5.412092919 | -0.017318075 |
| ENSMUSG00000085812 | Gm15843   | -0.096258603 | -0.970136639 | -0.38352675 | 2.195352724  |
| ENSMUSG00000030345 | Dyrk4     | 3.69910523   | -0.937820749 | 1.408116782 | 0.448393592  |

|                    |               |              |              |             |              |
|--------------------|---------------|--------------|--------------|-------------|--------------|
| ENSMUSG00000082357 | Gm13542       | 2.493303278  | -0.894862344 | 2.152130917 | 0.610351122  |
| ENSMUSG00000058700 | Gm8724        | -1.169348499 | -0.777365426 | -0.21008653 | 3.207984361  |
| ENSMUSG00000082123 | Gm16149       | 2.104698528  | -0.666923799 | 3.177717804 | 2.768729341  |
| ENSMUSG00000083922 | Gm3835        | 0.421528864  | -0.630340923 | 2.113486834 | -0.595393742 |
| ENSMUSG00000084143 | Gm13400       | 2.121131398  | -0.625728685 | 3.348680864 | 0.217566112  |
| ENSMUSG00000083173 | Gm13064       | -0.15961627  | -0.579571187 | 6.379092819 | -1.505942872 |
| ENSMUSG00000089728 | Clec2f-ps     | 2.116479053  | -0.574953065 | 2.756519389 | 1.572180079  |
| ENSMUSG00000020310 | Madcam1       | 2.675128457  | -0.519809341 | 3.582429501 | 1.079384329  |
| ENSMUSG00000076612 | Ighg2c        | -0.421948051 | -0.517399934 | -0.52815703 | 2.274133688  |
| ENSMUSG00000059565 | Gm5292        | 3.407085011  | -0.423048345 | 1.2410509   | -0.38137988  |
| ENSMUSG00000079906 | Gm15846       | 0.387861996  | -0.416606943 | 3.213890396 | -0.44997796  |
| ENSMUSG00000056508 | 1700001K19Rik | 2.872255858  | -0.395175384 | 1.988214376 | -0.573170086 |
| ENSMUSG00000082753 | -             | -0.826635936 | -0.312681436 | 3.357640023 | 1.560200987  |
| ENSMUSG00000082904 | -             | -0.826635936 | -0.312681436 | 4.347393001 | 1.00650983   |
| ENSMUSG00000024857 | Cabp2         | -1.42015935  | -0.264451158 | 2.819196078 | 3.718814526  |
| ENSMUSG00000024353 | 2010001M09Rik | 0.021253946  | -0.250830713 | 0.164692664 | 2.006440212  |
| ENSMUSG00000021983 | Atp8a2        | -0.475541873 | -0.235737603 | -0.06341887 | 4.7057368    |
| ENSMUSG00000050241 | Klre1         | 2.753118081  | -0.228711178 | 1.396188976 | 0.125546137  |
| ENSMUSG00000032611 | 1700102P08Rik | 0.576719224  | -0.206321685 | 3.10381048  | -1.547985737 |
| ENSMUSG00000078883 | -             | 1.683619043  | -0.166778421 | 1.257626125 | 3.306899146  |
| ENSMUSG00000058613 | Gm5062        | 1.376265172  | -0.126765685 | 0.350962455 | 2.325859219  |
| ENSMUSG00000091094 | -             | 1.394809139  | -0.084742308 | 1.205911177 | 4.083242535  |
| ENSMUSG00000075014 | Gm10800       | -0.273637626 | -0.044377739 | 2.320034132 | 0.027159367  |
| ENSMUSG00000063885 | Gm6498        | 0.038914612  | -0.033134051 | 2.525709391 | 2.957991134  |
| ENSMUSG00000087286 | Gm9013        | 0.021516211  | -0.023545311 | -1.41233015 | 4.818504468  |
| ENSMUSG00000085993 | Gm15905       | 2.678932757  | -0.020278798 | 0           | -0.396969407 |
| ENSMUSG00000072188 | Gm10354       | 2.134631919  | -0.018921687 | 2.981848991 | 0.587069142  |
| ENSMUSG00000026931 | 1700019N19Rik | 0            | 0            | 0           | 3.272796601  |
| ENSMUSG00000078520 | Gm13011       | 0            | 0            | 0           | 3.767358178  |
| ENSMUSG00000079621 | -             | 0            | 0            | 0           | 3.402435683  |
| ENSMUSG00000082417 | Gm13740       | 2.516868084  | 0            | 0.160600571 | 0            |
| ENSMUSG00000082502 | Gm12636       | 2.29658662   | 0            | 0.164089859 | 0            |
| ENSMUSG00000083533 | Gm13450       | 3.508352586  | 0            | 0           | 0            |
| ENSMUSG00000084003 | Gm15269       | 2.270023537  | 0            | 1.337197281 | 0.923209284  |
| ENSMUSG00000084393 | Gm14101       | -0.192517394 | 0            | 4.224973282 | 0            |
| ENSMUSG00000086242 | -             | 2.483532046  | 0            | 0           | 0            |
| ENSMUSG00000090915 | -             | 2.096538489  | 0            | 1.859977497 | 0            |
| ENSMUSG00000091348 | -             | -1.127369147 | 0            | -1.12736915 | 2.37824248   |
| ENSMUSG00000091410 | Gm17150       | 0            | 0            | 0           | 4.835454213  |
| ENSMUSG00000091441 | Gm17387       | 0            | 0            | 2.724589158 | 3.009343589  |
| ENSMUSG00000092159 | -             | -0.050127471 | 0            | 6.074566886 | 0.233254902  |
| ENSMUSG00000006143 | Upk3bl        | 0.764198362  | 0.013146236  | 1.317911817 | 3.12260487   |
| ENSMUSG00000054215 | Spr2k         | 0.55760391   | 0.038446808  | 0.146627013 | 2.813755639  |
| ENSMUSG00000058773 | Hist1h1b      | 1.684140556  | 0.057600473  | 0.220350862 | 3.448140846  |
| ENSMUSG00000091897 | Gm17019       | 2.934458972  | 0.065794754  | 3.141843505 | 1.142146981  |
| ENSMUSG00000091666 | -             | 1.265918949  | 0.123019057  | 3.564052327 | 0.239233048  |
| ENSMUSG00000018919 | Tm4sf5        | 2.182433153  | 0.152127965  | -1.47865445 | 0.832383547  |
| ENSMUSG00000028072 | Ntrk1         | 2.559245858  | 0.201344773  | 1.684034647 | 0.371774494  |

|                    |               |              |             |             |              |
|--------------------|---------------|--------------|-------------|-------------|--------------|
| ENSMUSG00000074629 | 4930518I15Rik | 2.406592483  | 0.218438794 | 1.772498044 | 0.531453111  |
| ENSMUSG00000084231 | Gm11975       | 2.720472725  | 0.300609035 | 2.156711408 | 2.397701893  |
| ENSMUSG00000056771 | Gm10010       | 3.276904263  | 0.318359441 | 0.131169432 | 2.404759696  |
| ENSMUSG00000091941 | Gm7399        | 0.428444187  | 0.329613239 | 0.665021455 | 2.480335759  |
| ENSMUSG00000073538 | E330020D12Rik | 2.148602964  | 0.341896744 | 1.592223421 | 1.106653554  |
| ENSMUSG00000091255 | Speer4e       | 2.657305295  | 0.35878218  | 2.808287639 | 1.003279749  |
| ENSMUSG00000083427 | Gm12007       | 2.327140318  | 0.38650819  | 0.740462048 | -0.549196539 |
| ENSMUSG00000086986 | Gm12103       | 2.161256619  | 0.389266683 | 1.750990723 | -0.351604548 |
| ENSMUSG00000083193 | 4930595D18Rik | 2.85719254   | 0.397561959 | 1.566808743 | 0.440072534  |
| ENSMUSG00000074518 | Gm10711       | 2.401271876  | 0.443058712 | 1.072602434 | -0.057743972 |
| ENSMUSG00000030017 | Reg3g         | 2.470600703  | 0.464561373 | 2.069119473 | 1.613436221  |
| ENSMUSG00000060747 | Il28b         | 2.16845912   | 0.472156043 | 0.406143699 | 1.494379767  |
| ENSMUSG00000053395 | Cacng8        | 3.403947313  | 0.49510671  | 0.212886163 | 0.640055399  |
| ENSMUSG00000091117 | Gm9064        | 0.791027403  | 0.567925905 | 2.223270769 | -0.922712741 |
| ENSMUSG00000045471 | Hcrt          | 3.234719771  | 0.569904204 | -0.24391885 | 0            |
| ENSMUSG00000076670 | Ighv3-5       | 0.8825155    | 0.594933535 | 0.286257816 | 2.251388863  |
| ENSMUSG00000003665 | Has1          | 1.30758057   | 0.603915125 | 2.561076808 | 0.88938856   |
| ENSMUSG00000081260 | Gm13149       | 0.610113441  | 0.61410673  | -0.26795521 | 2.141131926  |
| ENSMUSG00000085300 | Gm16345       | -0.676826778 | 0.652957259 | -0.54037345 | 2.300891005  |
| ENSMUSG00000037974 | Muc5ac        | -0.107624454 | 0.656690765 | 0.415779595 | 2.00998427   |
| ENSMUSG00000082202 | Gm4910        | 2.120106407  | 0.668601144 | 0.178864458 | -0.801123882 |
| ENSMUSG00000071005 | Ccl19         | 2.027042639  | 0.668698015 | 2.112171266 | 1.955255452  |
| ENSMUSG00000081241 | Gm14737       | 2.829502856  | 0.67382459  | 2.769603216 | -0.448746528 |
| ENSMUSG00000053821 | Gm9922        | 1.590081733  | 0.712742349 | 2.488380344 | 0.408841743  |
| ENSMUSG00000059128 | Il28a         | 2.20525174   | 0.713933312 | 0.288385732 | 1.115552679  |
| ENSMUSG00000022838 | Eaf2          | 0.560163894  | 0.72313151  | 0.138053688 | 2.427272921  |
| ENSMUSG00000084381 | AA413626      | 2.028179655  | 0.726678945 | 1.103528252 | -0.019874555 |
| ENSMUSG00000033219 | Gm9758        | 2.456706545  | 0.737611275 | 2.608995238 | 1.874159829  |
| ENSMUSG00000084194 | -             | 2.035727282  | 0.768367935 | 2.043797291 | 1.928822107  |
| ENSMUSG00000078361 | -             | 3.32741378   | 0.790708658 | 1.9668033   | 1.416958611  |
| ENSMUSG00000050635 | Spr2f         | 1.148827631  | 0.793357398 | 2.630836854 | 0            |
| ENSMUSG00000078736 | -             | 1.997860684  | 0.832400052 | 2.087058783 | 2.093471174  |
| ENSMUSG00000069720 | 4930572O03Rik | 2.231629828  | 0.844687013 | 1.993912183 | 2.431874879  |
| ENSMUSG00000073208 | Speer4c       | 2.083268513  | 0.849157398 | 2.461727624 | 1.675348771  |
| ENSMUSG00000091875 | -             | 3.015766781  | 0.852053162 | 1.462831578 | 0.119665347  |
| ENSMUSG00000040627 | Aicda         | 5.00558559   | 0.869341554 | 3.518297484 | 2.288800458  |
| ENSMUSG00000057610 | Ighv1-73      | -0.941376585 | 0.88098876  | 0.540616266 | 3.172373642  |
| ENSMUSG00000083842 | Gm12485       | 2.007772174  | 0.885505075 | 0.80850233  | 0.467126984  |
| ENSMUSG00000091272 | Gm17641       | 1.682943989  | 0.886580743 | 2.14657019  | 1.581824962  |
| ENSMUSG00000091723 | Gm17366       | 1.501357601  | 0.886735817 | 2.486223859 | 1.527609827  |
| ENSMUSG00000061947 | Serpina10     | 0.884936302  | 0.940946971 | 0.875267026 | 2.025512656  |
| ENSMUSG00000039531 | Zufsp         | 2.063739386  | 0.946459471 | 0.726124971 | 1.292339597  |
| ENSMUSG00000013928 | Thap8         | 2.708312017  | 0.948527276 | 1.143771572 | 1.004178788  |
| ENSMUSG00000039851 | 4932438H23Rik | 0.395365465  | 0.954341519 | 0.161769295 | 3.164236233  |
| ENSMUSG00000045232 | Rln3          | 2.186999155  | 0.956627863 | 1.168985494 | 1.874293311  |
| ENSMUSG00000079295 | Klrbl-ps1     | 3.178139577  | 0.966226936 | 2.81521672  | 0.041440286  |
| ENSMUSG00000040570 | Rundc3b       | 1.062809027  | 0.966239047 | 0.702005938 | 2.253920386  |
| ENSMUSG00000086265 | Marcksl1-ps4  | 1.237765608  | 0.970862626 | 0.840770976 | 2.295447064  |



|                    |               |              |             |             |              |
|--------------------|---------------|--------------|-------------|-------------|--------------|
| ENSMUSG00000059994 | Fcrl1         | 1.437997841  | 0.971946443 | 1.045449818 | 2.153464994  |
| ENSMUSG00000070708 | Gtsf11        | 2.101422936  | 0.973843664 | 0.887826978 | 3.065705116  |
| ENSMUSG00000063911 | Tdgl1-ps2     | 0.563503149  | 0.974905911 | -0.33232777 | 2.481886637  |
| ENSMUSG00000089871 | Speer7-ps1    | 1.540465521  | 0.976240289 | 2.634389788 | 2.077706291  |
| ENSMUSG00000078926 | Cdc20b        | 1.603592288  | 0.976285478 | 2.154617755 | 1.7354632    |
| ENSMUSG00000082587 | Gm12129       | 6.733376013  | 0.985343279 | 0.248170304 | 1.374735416  |
| ENSMUSG00000085915 | Gm8091        | 0.306182898  | 0.997416288 | 0.333507316 | 2.597239155  |
| ENSMUSG00000079528 | 1700021O21Rik | 3.721898752  | 1.014498127 | -0.20752307 | 0            |
| ENSMUSG00000075269 | Bex6          | 2.110159989  | 1.017316205 | 1.143866796 | 0.728795606  |
| ENSMUSG00000083285 | Gm15815       | 2.097729919  | 1.04137617  | 0.129692031 | 1.058337279  |
| ENSMUSG00000030954 | Gp2           | 2.527174012  | 1.042196099 | -0.34902112 | 2.230835361  |
| ENSMUSG00000078971 | -             | 1.07280432   | 1.046846662 | 0.516566524 | 2.460812333  |
| ENSMUSG00000078817 | Nlrp12        | 2.162104422  | 1.052863376 | 0.312017284 | 1.000316162  |
| ENSMUSG00000079330 | Lemd1         | 3.954282756  | 1.057769103 | 2.255428635 | 0.80079597   |
| ENSMUSG00000030111 | A2m           | 6.697943172  | 1.066419896 | 6.43029477  | 1.276198865  |
| ENSMUSG00000082262 | Gm14730       | 2.484599617  | 1.06709485  | 0.192841812 | 0.240706323  |
| ENSMUSG00000090665 | Gad1-ps       | 2.15858828   | 1.075069274 | 0.45183367  | 0.911593537  |
| ENSMUSG00000091445 | -             | 2.102713937  | 1.081089502 | 1.236594817 | 1.24546095   |
| ENSMUSG00000031385 | Plxnb3        | 1.139651402  | 1.087495135 | 9.066307304 | 0.390966259  |
| ENSMUSG00000061684 | Rpl21-ps8     | -1.674954642 | 1.09228551  | -1.90761889 | 2.367855305  |
| ENSMUSG00000030156 | Cd69          | 2.562250138  | 1.104824279 | 1.364734513 | 1.80427701   |
| ENSMUSG00000020010 | Vnn3          | 2.438496433  | 1.114401075 | 2.084086662 | 1.130693978  |
| ENSMUSG00000040133 | Gpr176        | 3.166152101  | 1.131241456 | 3.277925106 | 1.569128653  |
| ENSMUSG00000083630 | Gm15602       | 0.899140262  | 1.139855821 | 1.105089451 | 2.090206443  |
| ENSMUSG00000091919 | -             | 2.578467329  | 1.166418787 | 1.733771639 | 0.369875349  |
| ENSMUSG00000026088 | Mitd1         | 2.000332659  | 1.19725171  | 1.110172966 | 1.303638039  |
| ENSMUSG00000041754 | Trem3         | 2.003949478  | 1.216297893 | 0.790606216 | 1.286987644  |
| ENSMUSG00000026582 | Sele          | 3.012610042  | 1.226679294 | 2.775874757 | 2.410161531  |
| ENSMUSG00000021880 | Rnase6        | 2.103058982  | 1.228825774 | 0.867989733 | 1.573035371  |
| ENSMUSG00000080193 | Gm14756       | 0            | 1.228991464 | 3.623047448 | 1.299308035  |
| ENSMUSG00000055872 | Gm9985        | 3.222784659  | 1.231896878 | 1.898284574 | 1.921618057  |
| ENSMUSG00000000392 | Fap           | 1.230802314  | 1.233214988 | 0.514931101 | 2.224379051  |
| ENSMUSG00000078349 | AW011738      | 2.034112797  | 1.258511618 | 1.427885027 | 1.425624141  |
| ENSMUSG00000080076 | Hist1h2aj     | 0.610846095  | 1.265589704 | 1.159197021 | 2.319386673  |
| ENSMUSG00000038418 | Egr1          | 2.274703537  | 1.281974509 | 1.780488576 | 1.210659044  |
| ENSMUSG00000072909 | -             | 1.630244303  | 1.287383069 | 0.907560699 | 2.766757352  |
| ENSMUSG00000059108 | Ifitm6        | 3.010910299  | 1.289378744 | 1.581689994 | 1.123568525  |
| ENSMUSG00000038580 | Sct           | 4.412874252  | 1.291421704 | 2.980339539 | 1.803945242  |
| ENSMUSG00000001095 | Slc13a2       | 2.110397537  | 1.300374166 | 2.732008253 | 2.578307683  |
| ENSMUSG00000053541 | Gm4759        | 2.174341053  | 1.307495594 | 0.887103705 | 1.718682711  |
| ENSMUSG00000037246 | H2-M10.5      | 5.439655938  | 1.309455014 | 0.361111487 | 5.536726192  |
| ENSMUSG00000028362 | Tnfsf8        | 3.483337243  | 1.319727558 | 2.103590807 | 1.176249515  |
| ENSMUSG00000027580 | BC006779      | 2.036636084  | 1.320594515 | 1.410019974 | 1.591584119  |
| ENSMUSG00000090517 | -             | 0.95173473   | 1.326146803 | 0.820617578 | 2.404975375  |
| ENSMUSG00000090141 | Gm614         | 2.306502114  | 1.32886268  | 0.519124952 | -0.477617606 |
| ENSMUSG00000083045 | Gm16100       | 2.090161728  | 1.329433635 | 3.180664081 | 1.356312866  |
| ENSMUSG00000066258 | Trim12a       | 2.006050846  | 1.332310286 | 1.00571953  | 1.459593774  |
| ENSMUSG00000079451 | Tmprss11g     | 0.865864083  | 1.35880172  | 1.684284943 | 2.674406599  |

|                    |               |              |             |             |             |
|--------------------|---------------|--------------|-------------|-------------|-------------|
| ENSMUSG00000074000 | -             | 2.058895171  | 1.362737695 | 1.113859902 | -1.01032579 |
| ENSMUSG00000039748 | Exo1          | 2.083240591  | 1.371819374 | 0.45853473  | 1.901040523 |
| ENSMUSG00000019320 | Noxo1         | 2.248593247  | 1.381339652 | 1.269771455 | 1.864814545 |
| ENSMUSG00000037440 | Vnn1          | 2.341817986  | 1.397599628 | 1.06287683  | 1.417054053 |
| ENSMUSG00000040428 | Plekha4       | 2.569557084  | 1.412455158 | 1.824502606 | 1.281130191 |
| ENSMUSG00000031891 | Hsd11b2       | 2.074183842  | 1.413043449 | 1.480968107 | 1.448854838 |
| ENSMUSG00000000202 | Btbd17        | 2.60596229   | 1.418301779 | 2.828302572 | 1.410159224 |
| ENSMUSG00000054136 | Adm2          | 2.205273498  | 1.420871434 | 0.729015164 | 1.153283936 |
| ENSMUSG00000029304 | Spp1          | 0.508753132  | 1.421039635 | 1.075098935 | 2.003448171 |
| ENSMUSG00000078702 | -             | 0            | 1.428025663 | 2.106180788 | 2.198411949 |
| ENSMUSG00000047330 | Kcne4         | 2.144643981  | 1.438384315 | 1.693061611 | 1.018516692 |
| ENSMUSG00000026429 | Ube2t         | 0.928436448  | 1.449934454 | 0.983583357 | 2.071137467 |
| ENSMUSG00000047735 | Samd9l        | 2.198531036  | 1.452324856 | 1.084595717 | 1.627224252 |
| ENSMUSG00000047230 | Cldn2         | 3.240273272  | 1.457975882 | 2.791785382 | 0.400995502 |
| ENSMUSG00000030218 | Mgp           | 2.049852132  | 1.469254095 | 1.320928719 | 1.046953124 |
| ENSMUSG00000086143 | -             | 5.980178623  | 1.479829563 | 5.199400814 | 1.432958175 |
| ENSMUSG00000028255 | Clca3         | 5.915641551  | 1.495994086 | 5.153266848 | 2.475502513 |
| ENSMUSG00000066512 | Klk1b5        | 5.551269812  | 1.510227746 | 4.16624729  | 2.502033754 |
| ENSMUSG00000074529 | C330013J21Rik | 3.362496942  | 1.518819863 | 1.749726667 | 0.043010442 |
| ENSMUSG00000028751 | Pla2g2e       | 2.110461555  | 1.523017781 | 0.566821383 | 0.338401386 |
| ENSMUSG00000080142 | Gm12838       | 2.10500528   | 1.523814979 | 0.138309464 | 0.585821982 |
| ENSMUSG00000054044 | Gm9933        | 1.820585207  | 1.527271844 | 2.378567225 | 1.56124555  |
| ENSMUSG00000086705 | -             | 2.614459773  | 1.532837285 | 1.142089138 | 1.494867864 |
| ENSMUSG00000030117 | Gdf3          | 5.046062633  | 1.535137245 | 3.979291831 | 0.646447481 |
| ENSMUSG00000083081 | Gm13223       | 0.764522411  | 1.542994175 | 0.800301053 | 2.438639474 |
| ENSMUSG00000030365 | Clec2i        | 1.214305386  | 1.556993526 | 0.680294333 | 2.108737814 |
| ENSMUSG00000079700 | Fpr3          | 3.11345415   | 1.56722186  | 1.009824841 | 1.741588863 |
| ENSMUSG00000082507 | Gm9378        | -0.769006774 | 1.567989862 | 0.427848265 | 2.578532711 |
| ENSMUSG00000086176 | Gm15534       | 3.490888703  | 1.573876843 | 1.888996923 | 1.207709985 |
| ENSMUSG00000026630 | Batf3         | 1.310661199  | 1.592760644 | 0.786845716 | 2.317040694 |
| ENSMUSG00000047592 | Nxpe5         | 1.917291115  | 1.593651432 | 2.482150479 | 1.804676489 |
| ENSMUSG00000063286 | Gm8995        | 2.598939582  | 1.596933038 | 1.310995506 | 1.958643367 |
| ENSMUSG00000081173 | Gm13500       | 1.329986299  | 1.602566442 | -0.91488008 | 2.358973225 |
| ENSMUSG00000083796 | Gm13369       | -0.342942567 | 1.614194582 | -1.00254236 | 2.667833616 |
| ENSMUSG00000030650 | Tmc5          | 1.814872884  | 1.617182727 | 1.466132209 | 2.58719534  |
| ENSMUSG00000082163 | Gm14276       | 1.252069888  | 1.618733019 | -0.11663154 | 2.152700864 |
| ENSMUSG00000083186 | Gm11805       | 0.69237724   | 1.664804247 | 0.677476022 | 2.121902933 |
| ENSMUSG00000033213 | AA467197      | 5.29587973   | 1.668845283 | 2.694581782 | 1.794835876 |
| ENSMUSG00000063021 | Hist1h2ak     | 5.866406144  | 1.66963491  | 1.198210865 | 2.079761113 |
| ENSMUSG00000005410 | Mcm5          | 1.33588015   | 1.674553264 | 1.008600035 | 2.07995067  |
| ENSMUSG00000025001 | Hells         | 1.774549987  | 1.683686943 | 0.858168451 | 2.094455606 |
| ENSMUSG00000025492 | Ifitm3        | 2.245813399  | 1.69150779  | 1.439318054 | 1.454246558 |
| ENSMUSG00000003617 | Cp            | 2.060516327  | 1.693167063 | 1.093573747 | 1.713293881 |
| ENSMUSG00000038508 | Gdf15         | 2.777042797  | 1.696698484 | 2.595676546 | 1.850056633 |
| ENSMUSG00000030413 | Pglyrp1       | 2.285002143  | 1.698571116 | 2.113925652 | 1.915314895 |
| ENSMUSG00000040658 | BC048355      | 0.0737712    | 1.698579686 | 0.353069423 | 2.07078125  |
| ENSMUSG00000068129 | Cst7          | 2.514097665  | 1.699789739 | 1.845234894 | 2.089401949 |
| ENSMUSG00000083726 | -             | 2.069229808  | 1.702631478 | 1.799060071 | 2.578469673 |

|                    |                |              |             |             |             |
|--------------------|----------------|--------------|-------------|-------------|-------------|
| ENSMUSG00000039501 | Znfx1          | 2.319921457  | 1.709967907 | 1.178089416 | 1.777002207 |
| ENSMUSG00000040296 | Ddx58          | 2.468260279  | 1.726050458 | 1.405636126 | 1.836504321 |
| ENSMUSG00000024795 | Kif20b         | 0.995175665  | 1.726087136 | 0.292166142 | 2.12982521  |
| ENSMUSG00000059309 | Hist1h3f       | -0.086194323 | 1.737716274 | 0.370725321 | 2.243093233 |
| ENSMUSG00000060519 | Tor3a          | 2.423104276  | 1.738061852 | 1.14293348  | 1.673449968 |
| ENSMUSG00000043939 | A530064D06Rik  | 4.193290013  | 1.742067296 | 2.542219429 | 2.026904699 |
| ENSMUSG00000069892 | 9930111J21Rik2 | 2.21699083   | 1.748398712 | 0.943566666 | 1.778836157 |
| ENSMUSG00000049625 | Tifab          | 2.304004201  | 1.755770497 | 1.114993062 | 1.741626734 |
| ENSMUSG00000012428 | Steap4         | 2.474106622  | 1.75710571  | 1.733785898 | 2.057162261 |
| ENSMUSG00000090607 | Gm17052        | 0.49215583   | 1.762722844 | -0.22832184 | 2.007114126 |
| ENSMUSG00000026222 | Sp100          | 2.14419917   | 1.763225368 | 1.336393053 | 1.751988774 |
| ENSMUSG00000069893 | 9930111J21Rik1 | 2.228615686  | 1.766736028 | 0.98276355  | 1.805305178 |
| ENSMUSG00000075122 | Cd80           | 2.061782545  | 1.766764574 | 1.44186965  | 1.504542517 |
| ENSMUSG00000034652 | Cd300a         | 2.451428776  | 1.770920962 | 0.903219558 | 1.152933982 |
| ENSMUSG00000038301 | Snx10          | 2.137332494  | 1.777399727 | 0.621934513 | 1.691974917 |
| ENSMUSG00000030077 | Chl1           | 1.031755887  | 1.782770941 | 0.826783678 | 2.280519201 |
| ENSMUSG00000006930 | Hap1           | 2.221637836  | 1.783493814 | 1.505450611 | 1.830636576 |
| ENSMUSG00000069309 | Hist1h2an      | 1.575250852  | 1.786750937 | 1.736087212 | 2.265255156 |
| ENSMUSG00000030474 | Siglece        | 2.378875883  | 1.78875574  | 1.354698935 | 1.227896877 |
| ENSMUSG00000041347 | Bdkrb1         | 2.570827948  | 1.791529513 | 2.848792589 | 2.859311637 |
| ENSMUSG00000048498 | Cd300e         | 2.253005594  | 1.799239244 | 1.188493554 | 1.272348556 |
| ENSMUSG00000062417 | Hist1h3g       | 0.16548226   | 1.801220835 | -0.19825887 | 2.01517225  |
| ENSMUSG00000036931 | Nfkbid         | 1.96060256   | 1.805133567 | 1.909881742 | 2.083511686 |
| ENSMUSG00000031444 | F10            | 2.02696275   | 1.81071359  | 1.089865331 | 1.50493287  |
| ENSMUSG00000020089 | Ppa1           | 1.451835354  | 1.840701061 | 0.72414626  | 2.090047591 |
| ENSMUSG00000063268 | Parp10         | 2.017114869  | 1.843747649 | 1.204041829 | 1.732882157 |
| ENSMUSG00000021697 | Depdc1b        | -0.762336186 | 1.844122072 | 0.179367729 | 2.154510344 |
| ENSMUSG00000075404 | -              | 2.491028115  | 1.845060891 | 1.040021126 | 2.229177448 |
| ENSMUSG00000035673 | Sbno2          | 1.496376062  | 1.84688894  | 1.305104945 | 2.068545596 |
| ENSMUSG00000081832 | Gm6897         | 0            | 1.848898901 | 2.903418181 | 1.276291667 |
| ENSMUSG00000082910 | Gm14758        | 0.790532681  | 1.848898901 | 3.01802877  | 1.276291667 |
| ENSMUSG00000090792 | -              | 2.092787827  | 1.849880446 | 0.547196371 | 1.868045928 |
| ENSMUSG00000007080 | Pole           | 1.554959581  | 1.850522102 | 1.265742919 | 2.172708846 |
| ENSMUSG00000034883 | Lrr1           | 2.081062312  | 1.852802757 | 0.878587799 | 2.236505261 |
| ENSMUSG00000004707 | Ly9            | 2.291297878  | 1.858180619 | 1.312664323 | 1.840862942 |
| ENSMUSG00000092005 | -              | 2.019375568  | 1.861512813 | 1.116699446 | 1.673029368 |
| ENSMUSG00000030427 | Lilra6         | 2.156439218  | 1.862265583 | 0.779798084 | 1.609279998 |
| ENSMUSG00000083407 | Gm13176        | 2.326706293  | 1.862469683 | 2.01491462  | 2.3435756   |
| ENSMUSG00000034206 | Polq           | 1.623339134  | 1.868381943 | 1.149115396 | 2.269470043 |
| ENSMUSG00000062082 | Cd200r4        | 2.571023936  | 1.86997658  | 1.610970022 | 1.920011014 |
| ENSMUSG00000024079 | Eif2ak2        | 2.54168414   | 1.873493068 | 1.604377445 | 1.87801527  |
| ENSMUSG00000027078 | Ube2l6         | 2.369943693  | 1.874931579 | 1.127087966 | 1.815259495 |
| ENSMUSG00000040010 | Slc7a5         | 2.012805983  | 1.881947796 | 1.289038144 | 0.655097263 |
| ENSMUSG00000052759 | Gpr25          | -0.982605596 | 1.882000963 | 1.36897944  | 2.535467543 |
| ENSMUSG00000071713 | Csf2rb         | 1.579489554  | 1.88323192  | 1.145070862 | 2.044708631 |
| ENSMUSG00000079740 | Gm11172        | 2.504437343  | 1.884769823 | 1.159926219 | 1.941170179 |
| ENSMUSG00000050957 | Insl6          | 2.940193503  | 1.885620203 | 1.926053065 | 1.21787843  |
| ENSMUSG00000022584 | Ly6c2          | 2.426950357  | 1.890173249 | 1.054444293 | 1.342123034 |

|                    |               |              |             |             |             |
|--------------------|---------------|--------------|-------------|-------------|-------------|
| ENSMUSG00000039997 | Ifi203        | 2.61349756   | 1.892809835 | 1.483407285 | 2.134117149 |
| ENSMUSG00000053835 | H2-T24        | 2.202851795  | 1.893017664 | 1.321851932 | 1.677769788 |
| ENSMUSG00000045273 | Cenph         | 0.513363011  | 1.894327482 | 0.273469054 | 2.272686997 |
| ENSMUSG00000071350 | Setdb2        | 2.099219484  | 1.896918354 | 0.365947901 | 1.654382414 |
| ENSMUSG00000037868 | Egr2          | 2.419970374  | 1.898523945 | 1.785537457 | 1.778387722 |
| ENSMUSG00000028874 | Fgr           | 1.941109755  | 1.90329233  | 0.904843488 | 2.094620856 |
| ENSMUSG00000001156 | Mxd1          | 2.162912834  | 1.904687947 | 1.155556125 | 1.904472605 |
| ENSMUSG00000055172 | C1ra          | 2.004896686  | 1.910291062 | 1.075175044 | 1.720097294 |
| ENSMUSG00000036986 | Pml           | 2.386854182  | 1.910534598 | 1.48568241  | 0.660989432 |
| ENSMUSG00000034959 | 5031414D18Rik | 2.028641007  | 1.913137974 | 0.61860283  | 2.153664332 |
| ENSMUSG00000001901 | Kcnh6         | 0.239668632  | 1.913961298 | -0.01571449 | 3.315828189 |
| ENSMUSG00000027306 | Nusap1        | 0.367024795  | 1.915083116 | 0.184468674 | 2.430406894 |
| ENSMUSG00000069302 | Hist1h2ah     | -0.020665204 | 1.916508854 | 0.139409692 | 2.340035787 |
| ENSMUSG00000054040 | -             | 4.601779968  | 1.916776707 | 3.417499719 | 1.764991677 |
| ENSMUSG00000029664 | Tfpi2         | 3.126343567  | 1.917820077 | 1.419388063 | 1.521215688 |
| ENSMUSG00000024989 | Cep55         | 2.412478852  | 1.925654677 | 1.690846424 | 2.043500755 |
| ENSMUSG00000035355 | Kcnh4         | 2.061144795  | 1.925900697 | 1.513990632 | 2.211027685 |
| ENSMUSG00000060262 | -             | 1.534790948  | 1.930816325 | 1.73025477  | 2.525685854 |
| ENSMUSG00000023015 | Racgap1       | 1.444516256  | 1.931101725 | 1.097887087 | 2.153113322 |
| ENSMUSG00000082176 | Gm13163       | 0.143330458  | 1.938874199 | -0.97217922 | 2.557084743 |
| ENSMUSG00000071714 | Csf2rb2       | 1.64451532   | 1.940553695 | 1.195792445 | 2.170170092 |
| ENSMUSG00000039854 | -             | 4.362264401  | 1.944686555 | 2.992779824 | 1.857618281 |
| ENSMUSG00000001228 | Uhrf1         | 1.253044255  | 1.946893187 | 1.082832595 | 2.334249241 |
| ENSMUSG00000022876 | Samsn1        | 1.899619894  | 1.950945606 | 1.164074736 | 2.073806027 |
| ENSMUSG00000067341 | H2-Eb2        | 1.902227722  | 1.951155714 | 1.15452869  | 2.33227132  |
| ENSMUSG00000025129 | Ppp1r27       | -1.775586382 | 1.955612922 | 1.115361778 | 2.795781123 |
| ENSMUSG00000048327 | Ckap2l        | 1.139416755  | 1.959875446 | 0.847309889 | 2.502816341 |
| ENSMUSG00000029366 | Dck           | 2.211174935  | 1.963770684 | 1.250027907 | 2.312081666 |
| ENSMUSG00000091567 | -             | 2.374641698  | 1.967685512 | 1.327804137 | 2.293641764 |
| ENSMUSG00000091928 | -             | 2.389877898  | 1.979008064 | 1.33940256  | 2.298484234 |
| ENSMUSG00000034482 | Ly6g5c        | -0.40797438  | 1.979654995 | -0.88347727 | 2.595461907 |
| ENSMUSG00000091489 | -             | 0.271277283  | 1.985547791 | 0.386321292 | 3.297062258 |
| ENSMUSG00000019876 | Pkib          | 2.252614811  | 1.988334266 | 0.629077074 | 2.031399172 |
| ENSMUSG00000085149 | -             | 2.364061094  | 1.988992451 | 1.661662728 | 2.410556384 |
| ENSMUSG00000046688 | Tifa          | 1.517467414  | 1.989521463 | 0.624626692 | 2.273292199 |
| ENSMUSG00000073902 | Gm1966        | 2.495283706  | 1.990957393 | 1.054224555 | 2.26610833  |
| ENSMUSG00000068631 | Gm7676        | 2.103047104  | 1.993644213 | 1.636222821 | 1.754296691 |
| ENSMUSG00000087181 | Gm13570       | 1.097221668  | 1.994455689 | 2.332716166 | 1.201692993 |
| ENSMUSG00000022587 | Ly6e          | 2.197739204  | 1.994674179 | 1.660734931 | 1.897952555 |
| ENSMUSG00000051439 | Cd14          | 2.162940532  | 1.997158896 | 1.695561157 | 2.109908154 |
| ENSMUSG00000071068 | Trem12        | 2.25495622   | 1.999040384 | 1.623514004 | 2.256027007 |
| ENSMUSG00000069304 | -             | 1.534790948  | 2.002160629 | 2.336570379 | 2.409244761 |
| ENSMUSG00000059937 | -             | 2.016866644  | 2.004016893 | 0.765872905 | 1.817870067 |
| ENSMUSG00000020185 | E2f7          | 0.874105986  | 2.006042628 | 1.229515655 | 2.16672532  |
| ENSMUSG00000032586 | Traip         | 1.0946866    | 2.006819842 | 0.59580373  | 0.717265664 |
| ENSMUSG00000042345 | Ubash3a       | 0.309965357  | 2.008347788 | 0.432597834 | 1.650830739 |
| ENSMUSG00000051498 | Tlr6          | 1.736687255  | 2.008950539 | 0.793717371 | 2.115473696 |
| ENSMUSG00000089942 | Pira2         | 1.810046631  | 2.019510124 | 0.689974647 | 1.739921213 |

|                    |               |              |             |             |             |
|--------------------|---------------|--------------|-------------|-------------|-------------|
| ENSMUSG00000027995 | Tlr2          | 2.447728656  | 2.02125987  | 1.351299895 | 1.900949632 |
| ENSMUSG00000065968 | Ifitm7        | 2.282325408  | 2.023992549 | 1.930386676 | 2.023567655 |
| ENSMUSG00000022221 | Ripk3         | 1.493616711  | 2.025206746 | 0.792293465 | 1.746733429 |
| ENSMUSG00000038311 | 2410017I17Rik | 2.923949147  | 2.028644793 | -0.34998606 | 1.542337712 |
| ENSMUSG00000022831 | Hcls1         | 1.616502628  | 2.028831497 | 0.862735518 | 2.004326534 |
| ENSMUSG00000040829 | Zmynd15       | 1.818439536  | 2.029772133 | 1.109328714 | 1.701075042 |
| ENSMUSG00000030147 | Clec4b1       | 0.620023617  | 2.037357812 | 0.727935315 | 2.14224234  |
| ENSMUSG00000055413 | H2-Q5         | 1.870889908  | 2.03790792  | 1.088106985 | 1.484003657 |
| ENSMUSG00000032596 | Uba7          | 2.206676806  | 2.038356975 | 1.202245055 | 0.491577779 |
| ENSMUSG00000039236 | Isg20         | 2.750301105  | 2.039086644 | 1.430637145 | 1.959402541 |
| ENSMUSG00000052160 | Pld4          | 2.205374489  | 2.040236074 | 1.251586073 | 1.575844523 |
| ENSMUSG00000038523 | 1700003F12Rik | -0.667988379 | 2.042104099 | 0.231089617 | 1.560457998 |
| ENSMUSG00000028613 | Lrp8          | 1.881339508  | 2.042467195 | 1.156492834 | 2.338877395 |
| ENSMUSG00000074651 | Mcin          | 0.95585736   | 2.043687679 | 1.743258863 | 2.876997328 |
| ENSMUSG00000035455 | Figl1         | 2.090616217  | 2.04427159  | 1.467991109 | 1.968348303 |
| ENSMUSG00000041929 | -             | -0.905748517 | 2.04479024  | -0.16524557 | 2.544738751 |
| ENSMUSG00000026890 | Lhx6          | 1.081356952  | 2.047074445 | 0.063285124 | 1.443219954 |
| ENSMUSG00000028480 | Glpr2         | 1.288347725  | 2.04745852  | 0.539990125 | 1.74125823  |
| ENSMUSG00000092155 | -             | -0.531667744 | 2.047538326 | -0.0498133  | 2.459880677 |
| ENSMUSG00000050578 | Mmp13         | 2.14691817   | 2.048786813 | 1.838800418 | 0.726219965 |
| ENSMUSG00000030793 | Pycard        | 1.289860617  | 2.048931414 | 0.515818314 | 1.83529122  |
| ENSMUSG00000079620 | Muc4          | 2.185552468  | 2.049448795 | 2.152384659 | 2.554809267 |
| ENSMUSG00000031504 | Rab20         | 2.219933046  | 2.050920167 | 1.528899755 | 1.693271643 |
| ENSMUSG00000046908 | Ltb4r1        | 0.122824973  | 2.051093209 | 0.065234159 | 2.100055334 |
| ENSMUSG00000074419 | Gm15448       | 2.272439227  | 2.05184393  | 0.971145011 | 1.795364221 |
| ENSMUSG00000033453 | Adamts15      | 1.474052882  | 2.053277218 | 1.349207453 | 0.064311648 |
| ENSMUSG00000034947 | Tmem106a      | 2.068104602  | 2.054840791 | 1.155612495 | 1.768266538 |
| ENSMUSG00000024730 | Ms4a8a        | 1.718809789  | 2.057880271 | 0.798389631 | 1.866739316 |
| ENSMUSG00000003484 | Cyp4f18       | 2.282932559  | 2.058184508 | 1.345379552 | 1.463627233 |
| ENSMUSG00000067203 | H2-K2         | 1.696807945  | 2.058701152 | 1.056381566 | 1.659728435 |
| ENSMUSG00000040751 | Lat2          | 2.15122484   | 2.060112644 | 1.333869899 | 1.843410102 |
| ENSMUSG00000083668 | Gm5648        | 1.227889098  | 2.060884321 | 0.819651486 | 1.032690668 |
| ENSMUSG00000003283 | Hck           | 1.843479905  | 2.063271373 | 0.603976248 | 1.820639373 |
| ENSMUSG00000027715 | Ccna2         | 1.329744665  | 2.063614067 | 0.879335257 | 2.207982361 |
| ENSMUSG00000021451 | Sema4d        | 2.009715357  | 2.065496636 | 1.158820439 | 1.926253238 |
| ENSMUSG00000078452 | Raet1d        | 1.314551524  | 2.067936567 | 1.017494379 | 0.986367298 |
| ENSMUSG00000079505 | Gm11131       | 1.827721213  | 2.072279551 | 1.01340735  | 1.570586051 |
| ENSMUSG00000082803 | Gm14423       | 1.947440606  | 2.073976437 | 1.263744823 | 1.441632919 |
| ENSMUSG00000081665 | Gm15922       | 1.8694766    | 2.076526927 | 0.780365062 | 1.791290078 |
| ENSMUSG00000028071 | Sh2d2a        | 1.063772276  | 2.077278389 | 1.136083567 | 2.312512405 |
| ENSMUSG00000079298 | Klrb1b        | 2.661573314  | 2.077363795 | -0.50373412 | 1.90777766  |
| ENSMUSG00000026580 | Selp          | 2.517147657  | 2.079954375 | 1.847524502 | 2.619936605 |
| ENSMUSG00000037872 | Darc          | 2.210841406  | 2.084672313 | 1.255332425 | 2.014252614 |
| ENSMUSG00000073409 | H2-Q6         | 1.844285141  | 2.085102036 | 1.011974658 | 1.670376592 |
| ENSMUSG00000005640 | Insrr         | 3.07457019   | 2.085242064 | 1.516348533 | 2.211448329 |
| ENSMUSG00000082367 | Gm12363       | 0.611849187  | 2.085668316 | -0.27117704 | 0.61183805  |
| ENSMUSG00000027496 | Aurka         | 1.205874064  | 2.086230316 | 1.155846099 | 2.3479053   |
| ENSMUSG00000085995 | Gm2788        | 1.425676315  | 2.088532    | 0.617261726 | 3.160989478 |

|                    |               |              |             |             |             |
|--------------------|---------------|--------------|-------------|-------------|-------------|
| ENSMUSG00000079274 | -             | 3.008840981  | 2.089054229 | 1.32350087  | 2.631003389 |
| ENSMUSG00000074417 | Gm14548       | 2.013061972  | 2.089124561 | 0.880710146 | 1.836758606 |
| ENSMUSG00000033031 | C330027C09Rik | 1.325093359  | 2.09235363  | 0.231746747 | 2.198503069 |
| ENSMUSG00000074342 | I830077J02Rik | 2.620820022  | 2.092978683 | 0.868790914 | 1.822641107 |
| ENSMUSG00000030677 | Kif22         | 1.050449699  | 2.093490876 | 1.079963348 | 2.548623957 |
| ENSMUSG00000034641 | Cd300ld       | 3.061755575  | 2.09577645  | 1.650079399 | 1.982461712 |
| ENSMUSG00000035951 | Ascl3         | -0.558523946 | 2.099421259 | -0.96615375 | 1.795496567 |
| ENSMUSG00000026068 | Il18rap       | 1.955013401  | 2.101669807 | 0.705562332 | 1.666954288 |
| ENSMUSG00000005470 | Asf1b         | 0.454760365  | 2.101738766 | 0.579081147 | 2.53650192  |
| ENSMUSG00000074148 | -             | 1.689496486  | 2.102349132 | 0.485590139 | 0.026418689 |
| ENSMUSG00000030786 | Itgam         | 1.874258556  | 2.102370509 | 1.42643412  | 1.626074205 |
| ENSMUSG00000059657 | Stfa2l1       | 3.822671267  | 2.103902839 | 1.742403275 | 0.977095469 |
| ENSMUSG00000015854 | Cd5l          | 1.263869133  | 2.105675512 | 1.405638158 | 1.739605616 |
| ENSMUSG00000006642 | Tcf23         | 1.30792196   | 2.10961334  | 0.840827252 | 0.198786566 |
| ENSMUSG00000089950 | Gm16215       | 1.101670244  | 2.113417132 | 1.397074587 | 1.306058043 |
| ENSMUSG00000042607 | Asb4          | 1.082373422  | 2.115011551 | 0.814196735 | 2.864511889 |
| ENSMUSG00000084301 | Gm7856        | 1.890560002  | 2.115766086 | 1.26990409  | 2.303521167 |
| ENSMUSG00000061232 | H2-K1         | 1.84563553   | 2.115791591 | 1.044794353 | 1.48579345  |
| ENSMUSG00000050232 | Cxcr3         | 1.600494205  | 2.116266015 | 1.548667071 | 1.307162405 |
| ENSMUSG00000029829 | Tmem213       | 0.357925923  | 2.117756508 | 1.181974864 | 2.087141539 |
| ENSMUSG00000017861 | Mybl2         | 0.559160086  | 2.119203964 | 0.500326232 | 2.622809955 |
| ENSMUSG00000054520 | Sh3bp2        | 2.034834949  | 2.121307832 | 1.318943171 | 2.104535855 |
| ENSMUSG00000020848 | Doc2b         | 2.551023482  | 2.122030434 | 0.830821867 | 0.603460873 |
| ENSMUSG00000086133 | Gm16331       | -0.530991032 | 2.12345218  | 0.044078579 | 1.417078017 |
| ENSMUSG00000089929 | Bcl2a1b       | 1.831259382  | 2.124265902 | 0.651105951 | 0.239431055 |
| ENSMUSG00000067610 | Klri1         | 2.265225485  | 2.128817133 | 0.864894368 | 1.80433135  |
| ENSMUSG00000084220 | Gm12387       | 1.221945594  | 2.135779708 | 0.273031314 | 2.312701798 |
| ENSMUSG00000061100 | Retnla        | 2.334488125  | 2.136771849 | 2.773615043 | 2.998529294 |
| ENSMUSG00000087651 | 1500009L16Rik | 2.022264679  | 2.13817286  | 1.541277359 | 1.858785101 |
| ENSMUSG00000020053 | Igf1          | 1.882999813  | 2.139798724 | 0.869618622 | 1.850918858 |
| ENSMUSG00000002307 | Daxx          | 2.808844474  | 2.145838007 | 1.449674973 | 2.165767522 |
| ENSMUSG00000017146 | Brca1         | 1.575531904  | 2.146964209 | 1.39768233  | 2.209471258 |
| ENSMUSG00000073491 | Pydc4         | 3.854005242  | 2.151340434 | 2.304256708 | 2.272806309 |
| ENSMUSG00000018920 | Cxcl16        | 1.83378577   | 2.157193707 | 0.834338164 | 1.867755418 |
| ENSMUSG00000004328 | Hif3a         | 2.16259899   | 2.157270446 | 1.91367307  | 1.007955302 |
| ENSMUSG00000051354 | Samd3         | 1.559492071  | 2.158254329 | 0.50856388  | 2.113906816 |
| ENSMUSG00000035929 | H2-Q4         | 1.941071421  | 2.158507751 | 1.030565655 | 1.477041137 |
| ENSMUSG00000022504 | Ciita         | 1.745914541  | 2.159921809 | 0.902498426 | 2.495262073 |
| ENSMUSG00000079492 | Gm11127       | 1.649044701  | 2.161936025 | 0.924837063 | 1.707058121 |
| ENSMUSG00000073402 | Gm8909        | 2.241491911  | 2.162317289 | 1.133051638 | 1.735901055 |
| ENSMUSG00000078606 | Gm4070        | 2.284914072  | 2.163430058 | 1.046479629 | 2.432220065 |
| ENSMUSG00000086198 | -             | 0.343221282  | 2.163615426 | 0.93318601  | 1.167635197 |
| ENSMUSG00000053219 | Raet1e        | 1.263947823  | 2.164512815 | 0.833674627 | 1.003259947 |
| ENSMUSG00000038507 | Parp12        | 2.235353732  | 2.164969885 | 1.153696644 | 2.031682795 |
| ENSMUSG00000045868 | Gvin1         | 2.285103134  | 2.165257803 | 1.049102685 | 2.426847344 |
| ENSMUSG00000024910 | Ctsw          | 1.704235615  | 2.165858874 | 1.124188852 | 2.142679478 |
| ENSMUSG00000072377 | -             | 1.73207654   | 2.170924094 | 0.97074159  | 1.562345666 |
| ENSMUSG00000024112 | Cacna1h       | 1.241299239  | 2.172592962 | 0.951105417 | 1.619390682 |

|                    |               |              |             |             |             |
|--------------------|---------------|--------------|-------------|-------------|-------------|
| ENSMUSG00000017499 | Cdc6          | 1.805273533  | 2.174838257 | 1.615816666 | 2.271123774 |
| ENSMUSG00000080917 | Gm15925       | 1.958880996  | 2.175433127 | 0.909835376 | 1.880461293 |
| ENSMUSG00000024663 | Rab3il1       | 0.972720944  | 2.176988373 | 0.800763666 | 2.166702618 |
| ENSMUSG00000037313 | Tacc3         | 1.141861926  | 2.178573267 | 1.466915197 | 2.317715802 |
| ENSMUSG00000052477 | C130026I21Rik | 2.497831843  | 2.184179499 | 1.02239109  | 2.092153348 |
| ENSMUSG00000037997 | Parp11        | 2.506588908  | 2.18597232  | 1.092043191 | 2.261422377 |
| ENSMUSG00000042115 | Klhdc8a       | 1.431179842  | 2.186407058 | -0.18209878 | 1.037739505 |
| ENSMUSG00000051235 | Gen1          | 1.187271674  | 2.191559703 | 0.335788449 | 2.358599474 |
| ENSMUSG00000025739 | Gng13         | 0.908689103  | 2.193067733 | 0.515023598 | 2.630076915 |
| ENSMUSG00000053175 | Bcl3          | 1.775221016  | 2.194698148 | 1.818709115 | 2.55602656  |
| ENSMUSG00000050075 | Gpr171        | 2.556113902  | 2.199431028 | 1.425968049 | 2.432691672 |
| ENSMUSG00000060550 | H2-Q7         | 1.945263273  | 2.200213588 | 1.186235241 | 1.742365847 |
| ENSMUSG00000073821 | 8030451A03Rik | 1.839573144  | 2.201885887 | 1.472215896 | 2.256761479 |
| ENSMUSG00000001123 | Lgals9        | 2.285347691  | 2.202968335 | 1.39117004  | 1.994285697 |
| ENSMUSG00000046828 | Mettl21e      | 0.832318335  | 2.206988484 | 0.271115339 | 0.755984354 |
| ENSMUSG00000069301 | Hist1h2ag     | -0.032638863 | 2.20716174  | 1.360670472 | 2.515371076 |
| ENSMUSG00000034422 | Parp14        | 2.659687692  | 2.209352082 | 1.427323086 | 2.355236924 |
| ENSMUSG00000051949 | -             | 3.832862647  | 2.212572451 | 1.72100691  | 1.501546149 |
| ENSMUSG00000091388 | Gm17576       | -0.599548391 | 2.213655303 | 0.066917852 | 1.98906648  |
| ENSMUSG00000091747 | D17H6S56E-5   | 2.479025459  | 2.214808236 | 1.915113735 | 2.382133576 |
| ENSMUSG00000022431 | Ribc2         | 1.096645571  | 2.215391499 | 0.259612665 | 2.626816693 |
| ENSMUSG00000052485 | Tmem171       | 1.744031639  | 2.21593084  | 1.14777977  | 1.82436793  |
| ENSMUSG00000075602 | Ly6a          | 2.323050259  | 2.215968051 | 1.169439307 | 1.656528153 |
| ENSMUSG00000078783 | Gm9733        | 2.984813634  | 2.223704135 | 0.918604229 | 1.902980402 |
| ENSMUSG00000049734 | Trex1         | 2.518258889  | 2.225231929 | 1.484512815 | 0.708503464 |
| ENSMUSG00000079017 | Ifi2712a      | 2.691103126  | 2.226425154 | 2.194962301 | 2.39122965  |
| ENSMUSG00000079563 | Pglyrp2       | 0.440867992  | 2.228468655 | -0.05661582 | 2.512693453 |
| ENSMUSG00000026646 | Suv39h2       | 1.440056603  | 2.230720781 | 1.270940189 | 2.272835948 |
| ENSMUSG00000082039 | Gm15653       | -0.355169556 | 2.231162031 | -0.80498948 | 0.150553178 |
| ENSMUSG00000091253 | -             | 1.721137833  | 2.231222105 | -0.95660243 | -0.0339226  |
| ENSMUSG00000074420 | Gm10693       | 2.013042401  | 2.233046333 | 0.879650704 | 2.000604024 |
| ENSMUSG00000058818 | Lilrb3        | 2.170921384  | 2.234392441 | 1.071394716 | 1.975920377 |
| ENSMUSG00000081372 | Gm16171       | -0.593692614 | 2.236267054 | -1.55399836 | 2.777766887 |
| ENSMUSG00000027639 | Samhd1        | 2.067900535  | 2.239104081 | 0.867692603 | 2.117885497 |
| ENSMUSG00000032218 | Ccnb2         | 1.47357027   | 2.240678856 | 0.994696955 | 0.834047011 |
| ENSMUSG00000020399 | Havcr2        | 2.125089998  | 2.243516571 | 0.717189212 | 1.808873848 |
| ENSMUSG00000068348 | Gm10238       | 2.277642014  | 2.246405421 | 1.59869845  | 2.054257242 |
| ENSMUSG00000079553 | Kifc1         | 0.871646432  | 2.248746538 | 0.827630749 | 2.272767309 |
| ENSMUSG00000079004 | -             | 0.543059284  | 2.249131263 | 0.405512191 | 2.305809026 |
| ENSMUSG00000026896 | Ifih1         | 2.930823057  | 2.24955825  | 1.392022661 | 2.130041844 |
| ENSMUSG00000021886 | Gpr65         | 2.512903885  | 2.250218286 | 0.922074827 | 2.068883605 |
| ENSMUSG00000074476 | Spc24         | 1.416075244  | 2.254735596 | 1.504115513 | 0.518416186 |
| ENSMUSG00000044811 | AF251705      | 2.339077271  | 2.255369547 | 1.067103701 | 1.806195374 |
| ENSMUSG00000001444 | Tbx21         | 1.462566646  | 2.256989732 | 1.152637669 | 2.086958673 |
| ENSMUSG00000075010 | AW112010      | 2.581869813  | 2.257772357 | 1.301908971 | 2.151263481 |
| ENSMUSG00000061972 | Olfr99        | 2.845329462  | 2.259097128 | 1.11448624  | 2.549079576 |
| ENSMUSG00000066513 | Klk1b4        | 3.927045943  | 2.25927822  | 2.823718951 | 3.411061381 |
| ENSMUSG00000083994 | Gm16465       | 1.87869557   | 2.261616239 | 0.992219943 | 0.638936254 |

|                    |               |              |             |             |              |
|--------------------|---------------|--------------|-------------|-------------|--------------|
| ENSMUSG00000079019 | Insl3         | 1.573869851  | 2.262307719 | 1.627465941 | 2.569881412  |
| ENSMUSG00000041515 | Irf8          | 1.958773587  | 2.263790507 | 0.83664426  | 0.673373843  |
| ENSMUSG00000040204 | 2810417H13Rik | 0.918266751  | 2.264089686 | 0.523050742 | 0.526167083  |
| ENSMUSG00000070390 | Nlrp1b        | 2.569707297  | 2.265014047 | 1.018741732 | 2.282076654  |
| ENSMUSG00000074273 | Gm10657       | 1.972606457  | 2.265332576 | 0.73255175  | -0.217873988 |
| ENSMUSG00000029816 | GpnmB         | 2.314258884  | 2.267260735 | 1.543207784 | 1.753582351  |
| ENSMUSG00000071715 | Ncf4          | 2.085709609  | 2.267755136 | 1.25830418  | 2.223802187  |
| ENSMUSG00000074788 | -             | 1.694950937  | 2.269449312 | 0.887637607 | 1.937831639  |
| ENSMUSG00000037474 | Dtl           | 0.922762596  | 2.269748684 | 0.680568745 | 2.205095646  |
| ENSMUSG00000026458 | Ppfia4        | 2.374836665  | 2.273783256 | 1.135440115 | 1.850682694  |
| ENSMUSG00000066677 | Pydc3         | 3.205583544  | 2.274793159 | 1.641139471 | 2.080093048  |
| ENSMUSG00000026779 | Mastl         | 1.816970995  | 2.275736961 | 0.755318765 | 2.61664546   |
| ENSMUSG00000067614 | Krt86         | 1.793667101  | 2.277348028 | 0.559344066 | 2.447908143  |
| ENSMUSG00000091373 | Gm8810        | 1.384655528  | 2.277888641 | 0.751140118 | 1.896412535  |
| ENSMUSG00000087551 | -             | 2.204930154  | 2.278536477 | 1.390678456 | 2.490247016  |
| ENSMUSG00000024056 | Ndc80         | 0.731890434  | 2.282111364 | -0.23867719 | 2.442020533  |
| ENSMUSG00000025279 | Dnase113      | 2.053200583  | 2.288063169 | 1.138413344 | 2.370141989  |
| ENSMUSG00000075330 | A930003A15Rik | -1.762778974 | 2.29148249  | -0.76649335 | 1.038075436  |
| ENSMUSG00000089783 | Gm454         | 0.678528226  | 2.291878542 | 2.800095402 | 3.310726484  |
| ENSMUSG00000038218 | Gm9765        | 3.293716794  | 2.292086733 | 1.966297417 | 2.11116155   |
| ENSMUSG00000021624 | Cd180         | 2.529019487  | 2.292348925 | 0.648307883 | 1.947859142  |
| ENSMUSG00000047841 | BC051628      | -0.699934532 | 2.29482077  | -1.10276411 | 2.759913358  |
| ENSMUSG00000036362 | P2ry13        | 2.392392327  | 2.296375846 | 1.155130817 | 2.599707019  |
| ENSMUSG00000068227 | Il2rb         | 2.327843723  | 2.297156576 | 1.605382646 | 1.993392755  |
| ENSMUSG00000044583 | Tlr7          | 3.027523565  | 2.298965963 | 1.933213386 | 0.676595428  |
| ENSMUSG00000069310 | Hist1h3c      | -0.380792926 | 2.299450387 | -0.3782408  | 0.805780484  |
| ENSMUSG00000036067 | Slc2a6        | 2.537951614  | 2.30067554  | 1.195719571 | 2.495941697  |
| ENSMUSG00000025473 | Adam8         | 1.676173581  | 2.301268272 | 1.448034718 | 1.976490135  |
| ENSMUSG00000045763 | Basp1         | 1.962681916  | 2.304809718 | 1.72973554  | 1.997312007  |
| ENSMUSG00000084328 | Gm14046       | -0.182580146 | 2.305030289 | -0.5527296  | 3.003986676  |
| ENSMUSG00000022901 | Cd86          | 3.020751119  | 2.305628135 | 1.39952123  | 2.593915399  |
| ENSMUSG00000038963 | Slco4a1       | 1.36664039   | 2.306542427 | 0.997850442 | 2.115363814  |
| ENSMUSG00000025058 | 5430427O19Rik | 3.47043964   | 2.306751818 | 2.171416464 | 0.357097044  |
| ENSMUSG00000028873 | Cdca8         | 0.815688118  | 2.310708479 | 1.027675322 | 2.369994587  |
| ENSMUSG00000019845 | Tube1         | 0.139227219  | 2.312717    | 0.169078936 | 2.792492505  |
| ENSMUSG00000026669 | Mcm10         | 1.88749883   | 2.31332374  | 1.814074471 | 2.777008543  |
| ENSMUSG00000002068 | Cene1         | 2.417913845  | 2.3151159   | 1.900691615 | 2.537179145  |
| ENSMUSG00000034394 | Lif           | 2.4789831    | 2.315946688 | 1.840828239 | 1.956013165  |
| ENSMUSG00000025746 | Il6           | 6.957083194  | 2.316698959 | 6.17636304  | 2.576074627  |
| ENSMUSG00000020493 | Prr11         | 0.913685585  | 2.317185648 | 1.026223221 | 2.247802461  |
| ENSMUSG00000072244 | Trim6         | 2.306593679  | 2.317387612 | 0.975455926 | 2.010123601  |
| ENSMUSG00000049608 | Gpr55         | 1.898945949  | 2.317818464 | 1.039875177 | 2.677401594  |
| ENSMUSG00000070327 | Rnf213        | 2.797711893  | 2.318520278 | 1.711741965 | 2.498927505  |
| ENSMUSG00000070034 | Sp110         | 2.472469574  | 2.320084273 | 1.339814475 | 2.299181107  |
| ENSMUSG00000083617 | Gm5390        | -0.84740419  | 2.320100901 | 0.432961268 | -0.377008218 |
| ENSMUSG00000024529 | Lox           | 1.241374281  | 2.322834268 | 0.680779694 | 1.519839697  |
| ENSMUSG00000082088 | Gm15753       | 2.352740397  | 2.323275561 | 1.140040383 | 2.262725699  |
| ENSMUSG00000048534 | Amical        | 2.167987509  | 2.323970827 | 1.041962213 | 0.090147917  |



|                    |               |              |             |             |              |
|--------------------|---------------|--------------|-------------|-------------|--------------|
| ENSMUSG00000084169 | Gm12240       | -0.026958589 | 2.325553826 | -0.62726847 | 1.573008914  |
| ENSMUSG00000030867 | Plk1          | 1.263687208  | 2.327942393 | 1.022829541 | 2.557539863  |
| ENSMUSG00000038135 | Crygn         | -0.437164667 | 2.329056524 | -0.83807956 | 0.757709131  |
| ENSMUSG00000024696 | Lpxn          | 2.857952508  | 2.331617457 | 1.614139872 | 2.381638999  |
| ENSMUSG00000044827 | Thr1          | 2.425437016  | 2.332119303 | 1.179483486 | 2.4638952    |
| ENSMUSG00000073406 | H2-B1         | 1.984279003  | 2.33399305  | 1.048804459 | 1.628043946  |
| ENSMUSG00000028459 | Cd72          | 2.457093877  | 2.337330908 | 1.133299613 | 1.817879924  |
| ENSMUSG00000024339 | Tap2          | 1.910758176  | 2.338012248 | 0.767438307 | 2.234966978  |
| ENSMUSG00000081701 | Gm13890       | 0            | 2.338367362 | 0           | 0            |
| ENSMUSG00000026039 | Sgol2         | 1.096374031  | 2.34280222  | 0.464471141 | 2.076077674  |
| ENSMUSG00000083769 | Gm11689       | 0.824507679  | 2.342853368 | 0.293472108 | 1.307125678  |
| ENSMUSG00000021190 | Lgmn          | 1.946998358  | 2.344413471 | 1.182520895 | 1.673513551  |
| ENSMUSG00000042726 | Trafd1        | 2.326222758  | 2.345794186 | 1.205938755 | 2.157825792  |
| ENSMUSG00000070388 | Fbxo39        | 2.574271844  | 2.346100912 | 1.998652258 | 2.457014662  |
| ENSMUSG00000082692 | Gm15652       | -0.058299862 | 2.347230725 | 0.261758474 | 2.425079434  |
| ENSMUSG00000037860 | Aim2          | 2.050204598  | 2.34839341  | 1.046153988 | 2.190457967  |
| ENSMUSG00000021614 | Vcan          | 3.167359149  | 2.351453834 | 1.823265351 | 2.227680143  |
| ENSMUSG00000026548 | Slamf9        | 2.787803111  | 2.356543205 | 1.234210553 | 2.043656404  |
| ENSMUSG00000079455 | Gm16026       | 2.578624973  | 2.357702266 | 1.43434006  | 2.367237358  |
| ENSMUSG00000061852 | Gm7582        | 2.510024699  | 2.361100655 | 1.403499729 | 2.132688191  |
| ENSMUSG00000056290 | Ms4a4b        | 2.669543138  | 2.364540757 | 1.422826147 | 2.198131377  |
| ENSMUSG00000031765 | Mt1           | 2.040636443  | 2.365544708 | 2.101601208 | 2.000551986  |
| ENSMUSG00000081974 | Gm11960       | 3.085708976  | 2.366876803 | -0.40974805 | -0.607898263 |
| ENSMUSG00000041831 | Syt13         | 1.904743035  | 2.367768131 | 1.032414812 | 1.70033349   |
| ENSMUSG00000012443 | Kif11         | 1.560655315  | 2.369223301 | 1.21616059  | 2.552442945  |
| ENSMUSG00000049502 | Dtx3l         | 2.773785575  | 2.370556274 | 1.464199693 | 2.403918122  |
| ENSMUSG00000062007 | Hsh2d         | 3.217646458  | 2.371354549 | 2.050467252 | 2.773366451  |
| ENSMUSG00000030895 | Hpx           | 1.617637723  | 2.372957314 | 0.620458735 | 3.234657669  |
| ENSMUSG00000021208 | Ifi2712b      | 2.733766341  | 2.374642995 | 2.156753391 | 2.493961264  |
| ENSMUSG00000029811 | Abp1          | 2.629652085  | 2.375949057 | 1.495873632 | 2.080482127  |
| ENSMUSG00000027368 | Dusp2         | 2.107354802  | 2.37691691  | 1.256468796 | 2.394559753  |
| ENSMUSG00000078773 | Rad54b        | 1.059593733  | 2.37724532  | 1.048646424 | 2.624875349  |
| ENSMUSG00000041536 | Serpina3a     | 3.950928983  | 2.380971495 | 1.861040356 | 2.419914424  |
| ENSMUSG00000011008 | Mcoln2        | 2.002290605  | 2.381790065 | 1.08351621  | 2.707031099  |
| ENSMUSG00000031004 | Mki67         | 0.873329911  | 2.382807501 | 0.828670815 | 2.766878903  |
| ENSMUSG00000049109 | Themis        | -1.070782404 | 2.382842772 | -0.70269327 | 2.476173525  |
| ENSMUSG00000086076 | Ncr3-ps       | 1.330093223  | 2.388314789 | 1.097577291 | 3.0125445    |
| ENSMUSG00000087060 | 2810442I21Rik | 2.809670726  | 2.389472398 | 1.472668157 | 2.482119217  |
| ENSMUSG00000053977 | Cd8a          | -1.24124667  | 2.39216746  | -0.48215153 | 2.50708092   |
| ENSMUSG00000029414 | Kntc1         | 1.474158028  | 2.392950927 | 1.494042951 | 2.467369101  |
| ENSMUSG00000067212 | H2-T23        | 2.341181299  | 2.395704668 | 1.168056597 | 2.002483342  |
| ENSMUSG00000022548 | Apod          | 3.671461757  | 2.398085777 | 2.643964876 | 2.087241341  |
| ENSMUSG00000086513 | 9130208D14Rik | 2.403338827  | 2.398352998 | 1.091732853 | 2.591799806  |
| ENSMUSG00000078771 | Evi2a         | 2.486209964  | 2.399735602 | 1.13766405  | 2.281863062  |
| ENSMUSG00000083178 | Gm12187       | 2.918186739  | 2.400393927 | 1.24089074  | 2.523331265  |
| ENSMUSG00000090756 | -             | 0.642639577  | 2.401480705 | -0.81441423 | 1.263112395  |
| ENSMUSG00000024330 | Coll1a2       | 2.518959824  | 2.403845876 | 1.499461462 | 2.470116471  |
| ENSMUSG00000069273 | Hist1h3e      | -0.174245334 | 2.404204119 | -0.22011499 | 2.371953355  |

|                    |               |              |             |             |             |
|--------------------|---------------|--------------|-------------|-------------|-------------|
| ENSMUSG00000053063 | Clec12a       | 2.651323674  | 2.405547095 | 1.081157797 | 1.624489862 |
| ENSMUSG00000079491 | H2-T10        | 2.265938132  | 2.406754217 | 0.960167048 | 1.961919174 |
| ENSMUSG00000030268 | Bcat1         | 1.307750938  | 2.406867568 | 1.729669785 | 4.033223528 |
| ENSMUSG00000024337 | -             | 1.996984122  | 2.409361472 | 0.861572381 | 2.296761765 |
| ENSMUSG00000056116 | H2-T22        | 2.189875119  | 2.409371342 | 0.992539152 | 1.941773208 |
| ENSMUSG00000030651 | Art2b         | 1.352937371  | 2.410692883 | 0.736702751 | 2.1726648   |
| ENSMUSG00000010601 | Apol7a        | 1.550309207  | 2.413284032 | 0.325050852 | 1.907985758 |
| ENSMUSG00000090222 | Gm16340       | 2.56733091   | 2.422480768 | 1.484945427 | 2.48749795  |
| ENSMUSG00000090272 | Mndal         | 2.853262399  | 2.423405646 | 1.691350775 | 2.401672616 |
| ENSMUSG00000050107 | Gsg2          | 0.870232996  | 2.42365982  | 0.263436283 | 2.562735602 |
| ENSMUSG00000035004 | Igsf6         | 2.427716215  | 2.42968827  | 0.954699189 | 2.037023075 |
| ENSMUSG00000069267 | Hist1h3b      | 0.503009692  | 2.431091436 | 0.606492395 | 1.153826979 |
| ENSMUSG00000027398 | Il1b          | 3.086932422  | 2.431582295 | 2.459500813 | 2.815357429 |
| ENSMUSG00000073407 | Gm6034        | 1.871480404  | 2.431926052 | 0.471210045 | 2.051911453 |
| ENSMUSG00000054128 | H2-T3         | 2.33119812   | 2.433016544 | 2.460920396 | 1.744842793 |
| ENSMUSG00000002699 | Lcp2          | 1.573945988  | 2.433137213 | 0.761407889 | 2.276745676 |
| ENSMUSG00000017724 | Etv4          | 2.047286188  | 2.43354533  | 1.250132511 | 1.900705561 |
| ENSMUSG00000040528 | Gm885         | 2.416555661  | 2.433713233 | 1.350404038 | 2.333791669 |
| ENSMUSG00000024842 | Cabp4         | 2.070572088  | 2.433791009 | 1.330723571 | 1.791463468 |
| ENSMUSG00000046805 | Mpeg1         | 2.534292927  | 2.435071139 | 1.005687191 | 2.069061493 |
| ENSMUSG00000055994 | Nod2          | 2.380229184  | 2.437439129 | 1.352868939 | 2.59488435  |
| ENSMUSG00000037406 | Htra4         | 1.735943534  | 2.437985337 | 0.650096795 | 1.813927438 |
| ENSMUSG00000084170 | Gm11954       | 0.697810258  | 2.442019822 | -0.37250714 | 1.32894746  |
| ENSMUSG00000004952 | Rasa4         | 2.259515731  | 2.446701299 | 1.233811415 | 2.117433278 |
| ENSMUSG00000040483 | Xaf1          | 3.100748128  | 2.450320269 | 2.06737857  | 2.274449643 |
| ENSMUSG00000027322 | Siglec1       | 3.583151058  | 2.452286876 | 2.890877615 | 2.139791185 |
| ENSMUSG00000067613 | 5430421N21Rik | 0.369647504  | 2.454627567 | 0.496785074 | 2.048961378 |
| ENSMUSG00000046179 | E2f8          | 1.006090752  | 2.45813618  | 0.854375186 | 2.829392197 |
| ENSMUSG00000081512 | Gm15821       | 1.81667505   | 2.458570614 | 0.73544335  | 2.307876009 |
| ENSMUSG00000047511 | Olfrl396      | 1.70305639   | 2.466580139 | 0.661982127 | 2.226385217 |
| ENSMUSG00000033952 | Aspm          | 0.837029415  | 2.474407721 | 0.320662332 | 2.703027201 |
| ENSMUSG00000044701 | Il27          | 2.755609387  | 2.476546014 | 2.207160542 | 2.360870199 |
| ENSMUSG00000073405 | C920025E04Rik | 2.012434988  | 2.479163152 | 1.133804541 | 2.007503563 |
| ENSMUSG00000021266 | Wars          | 1.647786585  | 2.481701939 | 0.200901635 | 2.398671704 |
| ENSMUSG00000033538 | Casp4         | 2.572712172  | 2.484070717 | 1.475975735 | 0.823669495 |
| ENSMUSG00000058163 | Gm5431        | 3.208052863  | 2.485317276 | 1.780970064 | 2.447985089 |
| ENSMUSG00000018899 | Irf1          | 1.925746734  | 2.485927164 | 0.544064622 | 2.363198612 |
| ENSMUSG00000081143 | Gm15823       | -0.286380848 | 2.486722865 | 2.328987051 | 1.570334083 |
| ENSMUSG00000024014 | Pim1          | 1.837297086  | 2.487466494 | 1.326161492 | 2.586550399 |
| ENSMUSG00000032322 | Pstpip1       | 1.865995917  | 2.491753566 | 1.201547758 | 0.574940437 |
| ENSMUSG00000091428 | -             | 4.316934953  | 2.491799235 | 3.334312263 | 3.009343589 |
| ENSMUSG00000071280 | Gm10322       | 0.143330458  | 2.49359619  | -0.56015505 | 3.741986732 |
| ENSMUSG00000022021 | Diap3         | 2.733555488  | 2.498754134 | 2.160353679 | 2.310535103 |
| ENSMUSG00000000182 | Fgf23         | 1.852733985  | 2.499562725 | 2.692137023 | 5.099377261 |
| ENSMUSG00000039519 | Cyp7b1        | 3.242450398  | 2.500789112 | 2.13109915  | 2.622333245 |
| ENSMUSG00000021423 | Ly86          | 3.024206572  | 2.502585456 | 1.903426687 | 2.273257386 |
| ENSMUSG00000028793 | Rnf19b        | 1.921589888  | 2.502658211 | 0.88979112  | 2.167511088 |
| ENSMUSG00000030148 | Clec4a2       | 1.598540476  | 2.503616766 | 0.570194901 | 1.754508833 |

|                    |               |              |             |             |              |
|--------------------|---------------|--------------|-------------|-------------|--------------|
| ENSMUSG00000091191 | Gm17334       | 1.846682176  | 2.506897647 | 0.403709792 | 2.394534322  |
| ENSMUSG00000027331 | D2Ertd750e    | 1.486827105  | 2.508190999 | 0.837770842 | 2.301237245  |
| ENSMUSG00000036912 | Piwil4        | 2.653205075  | 2.509673386 | 1.9567779   | 1.483221654  |
| ENSMUSG00000023132 | Gzma          | 1.369181954  | 2.511697799 | 0.631462492 | 2.084595638  |
| ENSMUSG00000020330 | Hmmr          | 1.752895099  | 2.516577361 | 1.013156135 | 2.95803089   |
| ENSMUSG00000022906 | Parp9         | 2.62916772   | 2.518125655 | 1.424544504 | 2.456670891  |
| ENSMUSG00000024349 | Tmem173       | 2.124112244  | 2.522542359 | 1.547568925 | 2.666639988  |
| ENSMUSG00000061242 | Rpl21-ps7     | -1.472233841 | 2.523697711 | -1.94543445 | 1.980126311  |
| ENSMUSG00000087520 | Gm14389       | 0.729296134  | 2.527280567 | 0.887359863 | 2.400166278  |
| ENSMUSG00000033470 | Cysltr2       | 1.987072708  | 2.528728093 | 0.535721243 | 1.507176151  |
| ENSMUSG00000027832 | Ptx3          | 3.189863406  | 2.529123861 | 4.154893993 | 2.548783939  |
| ENSMUSG00000036768 | Kif15         | 0.401542795  | 2.530802303 | -0.22674087 | 0.77815897   |
| ENSMUSG00000026628 | Atf3          | 2.693960811  | 2.542349459 | 1.36170004  | 2.308795547  |
| ENSMUSG00000022094 | Slc39a14      | 2.445885149  | 2.547223377 | 1.486468762 | 2.508765746  |
| ENSMUSG00000090158 | -             | 3.034975546  | 2.549634107 | 1.784515924 | 2.421735243  |
| ENSMUSG00000073412 | Lst1          | 2.701906601  | 2.558799882 | 1.3791931   | 2.388532496  |
| ENSMUSG00000026605 | Cenpf         | 0.82961562   | 2.562961206 | 0.499123065 | 2.977210638  |
| ENSMUSG00000059639 | Clec4a4       | 1.462529939  | 2.571010095 | -0.43041019 | 1.751799103  |
| ENSMUSG00000035042 | Ccl5          | 2.436035528  | 2.573394106 | 1.588056522 | 2.324781067  |
| ENSMUSG00000024338 | Psmb8         | 2.309080262  | 2.57471778  | 1.176129389 | 2.475790908  |
| ENSMUSG00000021765 | Fst           | 0.877803261  | 2.582358065 | 0.320536177 | 1.600385055  |
| ENSMUSG00000058290 | Espl1         | 1.227300957  | 2.584012126 | 1.207515988 | 3.039979085  |
| ENSMUSG00000027843 | Ptpn22        | 2.217448536  | 2.586092593 | 1.100717583 | 1.920940537  |
| ENSMUSG00000006398 | Cdc20         | 1.183660021  | 2.589197814 | 1.119961758 | 2.85864349   |
| ENSMUSG00000082458 | Gm9430        | 1.256224058  | 2.591592111 | 0.661753537 | 1.244430478  |
| ENSMUSG00000023992 | Trem2         | 1.788306449  | 2.591911059 | 1.327508303 | 1.572156766  |
| ENSMUSG00000073980 | Gm9574        | 2.075114728  | 2.592494341 | 1.823439486 | 1.704809792  |
| ENSMUSG00000030154 | Klrblf        | 2.051553694  | 2.592913438 | 0.904036919 | 1.140064974  |
| ENSMUSG00000053475 | Tnfaip6       | 2.597325145  | 2.596121785 | 2.616965888 | 3.142506572  |
| ENSMUSG00000022582 | Ly6g          | 2.364391615  | 2.59738938  | 2.083414185 | 2.26456494   |
| ENSMUSG00000039899 | Fgl2          | 2.515947417  | 2.59876213  | 1.157497504 | 2.461269353  |
| ENSMUSG00000026955 | 2010317E24Rik | 1.030292917  | 2.600631403 | 0.559075407 | 3.068876408  |
| ENSMUSG00000070691 | Runx3         | 2.347989801  | 2.60162865  | 1.885082857 | 2.548228166  |
| ENSMUSG00000029915 | Clec5a        | 2.218155789  | 2.603098935 | 0.971507072 | 2.401691764  |
| ENSMUSG00000082129 | Gm14502       | 0            | 2.604028612 | 0           | 0            |
| ENSMUSG00000030745 | Ii21r         | 1.424510324  | 2.606529165 | 0.932478931 | 2.860942051  |
| ENSMUSG00000021322 | Aoah          | 2.140292561  | 2.606953327 | 1.013094978 | 2.402024231  |
| ENSMUSG00000022034 | Esco2         | 2.030486252  | 2.609881528 | 1.602976081 | 2.542716355  |
| ENSMUSG00000068101 | Cenpm         | 1.39227351   | 2.61377946  | 0.619184081 | 2.485893147  |
| ENSMUSG00000021281 | Tnfaip2       | 1.740841761  | 2.617953747 | 0.855469349 | 2.539678586  |
| ENSMUSG00000004612 | Nkg7          | 1.348641347  | 2.618085993 | 0.474525856 | 2.353735021  |
| ENSMUSG00000036469 | 1-Mar         | 1.859966914  | 2.618165262 | 1.006083293 | 2.617587317  |
| ENSMUSG00000085954 | -             | 3.18566669   | 2.619037026 | 2.539048106 | 2.304757007  |
| ENSMUSG00000022583 | Ly6f          | 2.42467246   | 2.62745286  | 2.229144591 | 2.201681217  |
| ENSMUSG00000037202 | Prf1          | 1.571926723  | 2.628349248 | 0.7977864   | 2.170092027  |
| ENSMUSG00000042489 | Clspn         | 1.237062335  | 2.629370026 | 1.015710195 | 2.660178641  |
| ENSMUSG00000090439 | Gm17455       | 1.581026465  | 2.636133992 | 1.486874911 | -0.894313049 |
| ENSMUSG00000030525 | Chrna7        | 2.704144731  | 2.6437404   | 1.793039315 | 3.092603126  |

|                    |               |             |             |             |             |
|--------------------|---------------|-------------|-------------|-------------|-------------|
| ENSMUSG00000034116 | Vav1          | 1.800648916 | 2.64478645  | 0.96037514  | 2.537412167 |
| ENSMUSG00000038943 | Prc1          | 1.479416372 | 2.647544825 | 1.031456952 | 3.019833484 |
| ENSMUSG00000027699 | Ect2          | 1.442266154 | 2.650925775 | 0.748106828 | 2.419163334 |
| ENSMUSG00000022586 | Ly6i          | 2.695743617 | 2.652193391 | 1.504627536 | 2.229802588 |
| ENSMUSG00000044170 | Olfrl384      | 0.519268394 | 2.656340886 | -0.54200004 | 2.71106203  |
| ENSMUSG00000020415 | Pttg1         | 2.490273728 | 2.656475821 | 1.764151887 | 2.660684679 |
| ENSMUSG00000028602 | Tnfrsf8       | 0.926260259 | 2.660787952 | -0.90941864 | 2.295025967 |
| ENSMUSG00000091650 | Apol11a       | 1.211438675 | 2.669962232 | 0.397811676 | 2.313291105 |
| ENSMUSG00000039981 | Zc3h12d       | 2.125823332 | 2.672220522 | 1.603041848 | 2.66143901  |
| ENSMUSG00000072082 | Ccnf          | 1.173433332 | 2.675105402 | 0.702957229 | 2.722776795 |
| ENSMUSG00000040017 | Saa4          | 6.10142764  | 2.675307851 | 3.924006726 | 2.38115045  |
| ENSMUSG00000005696 | Sh2d1a        | 0.146041764 | 2.676611522 | -0.18220971 | 1.697878044 |
| ENSMUSG00000043832 | Clec4a3       | 2.861341678 | 2.682091595 | 1.369496708 | 2.049054888 |
| ENSMUSG00000036887 | C1qa          | 1.732050465 | 2.683272836 | 1.487886482 | 2.252669189 |
| ENSMUSG00000028068 | Iqgap3        | 1.966052436 | 2.683533954 | 1.802114013 | 2.361311469 |
| ENSMUSG00000022385 | Gtse1         | 1.307994818 | 2.68414319  | 1.125861006 | 2.569269271 |
| ENSMUSG00000084160 | Gm13345       | 3.137158468 | 2.690381041 | 2.456384641 | 0.052150114 |
| ENSMUSG00000026683 | Nuf2          | 2.204693837 | 2.692644218 | 1.591229652 | 3.313334163 |
| ENSMUSG00000085607 | -             | 2.488370149 | 2.697996617 | 1.609282912 | 2.247692228 |
| ENSMUSG00000047728 | BC025446      | 2.447677514 | 2.701087842 | 2.229707851 | 2.176696903 |
| ENSMUSG00000002055 | Spag5         | 0.705653833 | 2.702454402 | 0.613098766 | 3.159513273 |
| ENSMUSG00000048806 | Ifnb1         | 3.111734121 | 2.703676599 | 2.059905529 | 2.628974182 |
| ENSMUSG00000058715 | Fcer1g        | 2.500059094 | 2.706743475 | 1.481909126 | 2.328968823 |
| ENSMUSG00000078780 | Gm5150        | 2.457091649 | 2.709109163 | 1.771989204 | 2.509539775 |
| ENSMUSG00000073822 | -             | 0.407521923 | 2.709805356 | 0.767094358 | 1.561986809 |
| ENSMUSG00000040084 | Bub1b         | 0.82885484  | 2.710196412 | 0.66445728  | 2.908387679 |
| ENSMUSG00000056529 | Ptafr         | 3.03531409  | 2.712581826 | 1.48228342  | 2.29460373  |
| ENSMUSG00000036896 | C1qc          | 1.739695331 | 2.713688739 | 1.180210819 | 2.324264221 |
| ENSMUSG00000051378 | Kif18b        | 0.87440368  | 2.716843174 | 1.051938854 | 2.849995097 |
| ENSMUSG00000023505 | Cdca3         | 0.877055568 | 2.717422124 | 1.126940944 | 2.942019933 |
| ENSMUSG00000024791 | Cdca5         | 1.318274145 | 2.720170742 | 1.018334881 | 2.984768044 |
| ENSMUSG00000040033 | Stat2         | 2.73147649  | 2.724605852 | 1.808022962 | 2.815390981 |
| ENSMUSG00000015880 | Ncapg         | 1.86896965  | 2.725398279 | 1.504761415 | 3.059170956 |
| ENSMUSG00000030142 | Clec4e        | 4.423633555 | 2.726111487 | 2.896530497 | 2.398476454 |
| ENSMUSG00000027469 | Tpx2          | 1.514855286 | 2.727129407 | 0.82613707  | 2.671101741 |
| ENSMUSG00000037991 | Rmi2          | 1.497967597 | 2.732935657 | 0.512138812 | 2.968371204 |
| ENSMUSG00000024222 | Fkbp5         | 2.110068811 | 2.733091417 | 2.070284886 | 2.066358857 |
| ENSMUSG00000021714 | Cenpk         | 3.131403822 | 2.735315725 | 1.171474311 | 2.945510437 |
| ENSMUSG00000091344 | -             | 1.077796723 | 2.740678141 | 0.772483655 | 2.005799964 |
| ENSMUSG00000082273 | Gm14801       | 1.480603789 | 2.747720979 | 1.357855548 | 2.814030572 |
| ENSMUSG00000026770 | Il2ra         | 2.462827107 | 2.753596804 | 1.841709281 | 2.829034423 |
| ENSMUSG00000053168 | 9030619P08Rik | 2.266343277 | 2.756472547 | 1.987022983 | 2.76238721  |
| ENSMUSG00000038642 | Ctss          | 2.582391161 | 2.756915636 | 1.405082884 | 2.3552046   |
| ENSMUSG00000079712 | Gm8597        | 2.906365955 | 2.759835859 | 2.533226212 | 2.816388783 |
| ENSMUSG00000046295 | Ankle1        | 0.762500368 | 2.766722943 | 0.827171295 | 3.148697223 |
| ENSMUSG00000058728 | Cd300c        | 1.03305279  | 2.769502776 | 0.666335714 | 2.57461811  |
| ENSMUSG00000036905 | C1qb          | 1.875649259 | 2.775105909 | 1.500450681 | 2.353661412 |
| ENSMUSG00000043873 | Chi317        | 0.79572881  | 2.777920068 | -0.42846173 | 0.021412464 |

|                    |               |              |             |             |             |
|--------------------|---------------|--------------|-------------|-------------|-------------|
| ENSMUSG00000038357 | Camp          | -0.780537495 | 2.780119063 | -1.11876484 | 0.316307888 |
| ENSMUSG00000074385 | Gm10684       | 2.220774584  | 2.788380051 | 0.972667216 | 0.263322746 |
| ENSMUSG00000029378 | Areg          | 3.511942494  | 2.788907334 | 3.263946593 | 2.363056842 |
| ENSMUSG00000049303 | Syt12         | 1.972114871  | 2.793131451 | 1.050585106 | 2.243356151 |
| ENSMUSG00000037731 | Themis2       | 2.732105989  | 2.809972285 | 1.407218499 | 2.64356134  |
| ENSMUSG00000030167 | Klrc1         | 1.732158261  | 2.812450509 | 0.099120099 | 2.704751269 |
| ENSMUSG00000031756 | Cenpn         | 0.624813364  | 2.814992813 | 0.659578201 | 0.877245492 |
| ENSMUSG00000027199 | Gatm          | 2.042479528  | 2.815309555 | 0.856457563 | 2.604041707 |
| ENSMUSG00000091564 | -             | 2.51227461   | 2.816064617 | 0.303372799 | 2.159075025 |
| ENSMUSG00000069792 | Wfdc17        | 2.104809726  | 2.81880193  | 1.588571803 | 2.897189358 |
| ENSMUSG00000045328 | Cenpe         | 1.255172425  | 2.81901468  | 0.623030236 | 3.004668954 |
| ENSMUSG00000090646 | -             | 1.548655681  | 2.822647126 | 1.083603634 | 2.407473407 |
| ENSMUSG00000020649 | Rrm2          | 0.812911113  | 2.839021584 | 1.10172983  | 3.143836851 |
| ENSMUSG00000045381 | Olfr433       | -0.27721526  | 2.83991609  | -0.71926867 | 1.819414936 |
| ENSMUSG00000024677 | Ms4a6b        | 3.014463587  | 2.843477866 | 1.703651233 | 2.572042073 |
| ENSMUSG00000033644 | Piwil2        | 1.548007283  | 2.84556716  | 1.110255399 | 2.549372327 |
| ENSMUSG00000020897 | Aurkb         | 1.195669597  | 2.846559298 | 1.105394708 | 2.880358075 |
| ENSMUSG00000032691 | Nlrp3         | 2.455326743  | 2.846977048 | 1.478315395 | 2.501378327 |
| ENSMUSG00000027219 | Slc28a2       | 2.695727809  | 2.848460972 | 0.994724806 | 2.352159216 |
| ENSMUSG00000035852 | 9130017N09Rik | 2.923281319  | 2.864554722 | 1.67796078  | 2.472140389 |
| ENSMUSG00000090128 | Gm16038       | 2.901204657  | 2.867429996 | 1.789176732 | 2.740553457 |
| ENSMUSG00000023940 | Sgol1         | 1.039182779  | 2.870272856 | 0.832287506 | 3.264429465 |
| ENSMUSG00000057465 | Saa2          | 6.692915895  | 2.870356828 | 5.307799649 | 3.252919703 |
| ENSMUSG00000081446 | Gm14068       | 1.62912826   | 2.870530478 | 0.481082251 | 1.565585078 |
| ENSMUSG00000049103 | Ccr2          | 2.950456144  | 2.870991096 | 1.470753278 | 1.257517404 |
| ENSMUSG00000024340 | Btl2          | 0.90205289   | 2.875322618 | -0.22116545 | 2.689515769 |
| ENSMUSG00000081206 | Gm11935       | -0.431975902 | 2.879038262 | 1.141484348 | 0.57955033  |
| ENSMUSG00000029298 | Gbp9          | 2.353209078  | 2.881633949 | 0.43765842  | 2.854508683 |
| ENSMUSG00000052749 | Trim30b       | 3.965083053  | 2.890823901 | 2.444005854 | 2.672550404 |
| ENSMUSG00000072572 | Slc39a2       | 2.027406831  | 2.894887278 | 0.886224658 | 2.764914886 |
| ENSMUSG00000017716 | Birc5         | 1.134268618  | 2.895093845 | 1.204395419 | 3.051997026 |
| ENSMUSG00000038179 | Slamf7        | 3.521981746  | 2.900714437 | 1.259200385 | 2.743294754 |
| ENSMUSG00000026073 | Il1r2         | 2.190910563  | 2.909046771 | 1.172788324 | 2.204345811 |
| ENSMUSG00000041324 | Inhba         | 3.069699563  | 2.914554806 | 1.634477105 | 2.659757168 |
| ENSMUSG00000084139 | Gm12322       | 0.237369316  | 2.921153557 | -1.29717516 | 0.64768843  |
| ENSMUSG00000022622 | Acr           | -0.367409692 | 2.927042861 | -0.85716495 | 1.751462223 |
| ENSMUSG00000041431 | Ccnb1         | 1.777701211  | 2.934073583 | 0.953358829 | 3.13537789  |
| ENSMUSG00000073411 | H2-D1         | 2.231797201  | 2.93503563  | 1.000586978 | 1.269601023 |
| ENSMUSG00000046057 | Gm15428       | 0.406996354  | 2.93554255  | 0.150887694 | 3.226630058 |
| ENSMUSG00000017832 | Hspb9         | 1.45852844   | 2.939865837 | 0.297196317 | 0.979772961 |
| ENSMUSG00000022014 | Epsti1        | 3.382246763  | 2.948977815 | 2.324737775 | 2.924461369 |
| ENSMUSG00000061577 | Gpr114        | 3.356722354  | 2.950165734 | 2.354413499 | 3.048327084 |
| ENSMUSG00000035493 | Tgfbi         | 2.420210406  | 2.958956176 | 1.333807188 | 2.646354997 |
| ENSMUSG00000053113 | Socs3         | 2.872479952  | 2.962834641 | 2.790208485 | 3.098828841 |
| ENSMUSG00000028971 | Cort          | 0.210781895  | 2.964233594 | 1.692685033 | 3.579031324 |
| ENSMUSG00000058755 | Osm           | 3.3019049    | 2.96464423  | 3.354215329 | 3.081116752 |
| ENSMUSG00000083822 | Hmgb1-ps5     | 2.99350821   | 2.967617337 | 1.602310975 | 2.693413254 |
| ENSMUSG00000072621 | Slfn10-ps     | 3.971868948  | 2.970256052 | 2.140984941 | 2.810921845 |

|                    |               |              |             |              |             |
|--------------------|---------------|--------------|-------------|--------------|-------------|
| ENSMUSG00000074622 | Mafb          | 1.779326539  | 2.978473914 | 1.210207527  | 2.500866911 |
| ENSMUSG00000002992 | Apoc2         | 2.347277244  | 2.982181585 | 1.605075252  | 1.691193829 |
| ENSMUSG00000009292 | Trpm2         | 2.209930749  | 2.992676151 | 0.941215149  | 2.426172211 |
| ENSMUSG00000040253 | Gbp7          | 2.776042409  | 2.996200037 | 1.008201797  | 3.101823305 |
| ENSMUSG00000031872 | Bean1         | 1.835327659  | 2.997067928 | 0.017651866  | 1.529576476 |
| ENSMUSG00000028678 | Kif2c         | -0.771868212 | 2.998372077 | -1.609355545 | 2.939733856 |
| ENSMUSG00000023913 | Pla2g7        | 2.956498879  | 3.002527691 | 1.506334037  | 2.175120183 |
| ENSMUSG00000079071 | Gm14085       | 3.075052847  | 3.011791909 | 1.447187083  | 2.469693425 |
| ENSMUSG00000057191 | AB124611      | 2.684051319  | 3.013981529 | 1.300984023  | 1.340839562 |
| ENSMUSG00000026656 | Fcgr2b        | 2.478724363  | 3.015810046 | 1.537627969  | 2.879826016 |
| ENSMUSG00000026104 | Stat1         | 2.864605425  | 3.015896822 | 1.454080166  | 3.143851772 |
| ENSMUSG00000030921 | Trim30a       | 3.579839946  | 3.018381432 | 1.878969212  | 3.006879843 |
| ENSMUSG00000072620 | Slfn2         | 3.030581294  | 3.018671572 | 1.746758146  | 2.866248277 |
| ENSMUSG00000020684 | Ras110b       | 2.925369697  | 3.019209358 | 1.465845279  | 1.943538819 |
| ENSMUSG00000033777 | Tlr13         | 3.672926554  | 3.026358174 | 1.904391405  | 1.111678504 |
| ENSMUSG00000041498 | Kif14         | 0.683694002  | 3.02745071  | 0.523235365  | 2.981882462 |
| ENSMUSG00000040328 | Olfir56       | 2.849846385  | 3.034614698 | 1.325432727  | 2.883400456 |
| ENSMUSG00000038209 | Itln1         | 1.970515055  | 3.04084207  | 1.337260805  | 2.939891789 |
| ENSMUSG00000039315 | Clnk          | 2.475693123  | 3.043332299 | 0.966088217  | 2.892437415 |
| ENSMUSG00000009214 | Tmem8c        | 0.35470265   | 3.044893766 | 0.541217448  | 3.072477423 |
| ENSMUSG00000026009 | Icos          | 1.369610865  | 3.047758686 | 1.167742776  | 2.872549662 |
| ENSMUSG00000029075 | Tnfrsf4       | 1.707926762  | 3.048978823 | 1.410525733  | 3.451320416 |
| ENSMUSG00000089763 | Gm2635        | 3.630692695  | 3.055583199 | 2.546986381  | 3.036371663 |
| ENSMUSG00000055541 | Lair1         | 3.141119994  | 3.065315145 | 0.94450326   | 2.566902154 |
| ENSMUSG00000066361 | Serpina3c     | 2.45404371   | 3.068532227 | 1.474221772  | 2.420646922 |
| ENSMUSG00000023078 | Cxcl13        | 2.415378052  | 3.071355355 | 1.092034648  | 2.203381874 |
| ENSMUSG00000033880 | Lgals3bp      | 3.312368345  | 3.080885468 | 2.412359854  | 2.722622095 |
| ENSMUSG00000036596 | Cpz           | 1.74279246   | 3.08116511  | 1.223236686  | 2.430255169 |
| ENSMUSG00000037921 | Ddx60         | 3.50592884   | 3.08491574  | 1.800527763  | 2.75995711  |
| ENSMUSG00000033355 | Rtp4          | 3.012831295  | 3.08522515  | 2.186153799  | 3.048692992 |
| ENSMUSG00000086123 | Gm16060       | -0.544990248 | 3.090084503 | -0.5508299   | 2.793304647 |
| ENSMUSG00000082000 | Gm12488       | 0.273637626  | 3.093645642 | 0.203330226  | 1.039116033 |
| ENSMUSG00000020808 | Fam64a        | 0.676529841  | 3.093934442 | 0.966728504  | 2.517208683 |
| ENSMUSG00000063177 | Klk1b27       | 4.183776277  | 3.094139732 | 3.284382596  | 3.578153859 |
| ENSMUSG00000047798 | Cd300lf       | 3.193988638  | 3.098425057 | 1.951339076  | 2.53814267  |
| ENSMUSG00000050896 | Rtn4rl2       | 3.204338802  | 3.108466755 | 2.69016778   | 2.74095848  |
| ENSMUSG00000025877 | Hk3           | 2.625245018  | 3.115405272 | 0.881790653  | 2.842895215 |
| ENSMUSG00000034329 | Brip1         | 1.608376914  | 3.115884262 | 0.898795035  | 3.164932791 |
| ENSMUSG00000055629 | B4galnt4      | 0.903629245  | 3.118873618 | 0.72638646   | 2.382446841 |
| ENSMUSG00000074146 | 4930579C12Rik | 2.432013151  | 3.126697065 | 0.74286731   | 2.156210281 |
| ENSMUSG00000047293 | Gpr15         | 4.14782601   | 3.133284681 | 2.694953692  | 3.45315755  |
| ENSMUSG00000024124 | Prss30        | 2.402353626  | 3.138483344 | 1.873340389  | 3.527648556 |
| ENSMUSG00000063903 | Klk1          | 5.395005916  | 3.147945363 | 4.112129761  | 3.532876643 |
| ENSMUSG00000022824 | Muc13         | 0.446332011  | 3.150234599 | 1.187403338  | 4.383046678 |
| ENSMUSG00000067843 | -             | 0            | 3.154077639 | 0            | 0           |
| ENSMUSG00000028262 | Clca2         | 3.180285941  | 3.155071596 | 1.737714793  | 2.629042886 |
| ENSMUSG00000021403 | Serpib9b      | 1.802411955  | 3.15862518  | 0.455495715  | 1.585600875 |
| ENSMUSG00000069793 | Slfn9         | 4.309450499  | 3.158737615 | 2.851458549  | 3.325068098 |

|                    |               |             |             |             |              |
|--------------------|---------------|-------------|-------------|-------------|--------------|
| ENSMUSG00000058470 | Gm8369        | 4.112775042 | 3.159543235 | 3.173920632 | 2.925535198  |
| ENSMUSG00000048922 | Cdca2         | 1.358781643 | 3.163279252 | 1.342800243 | 3.411774395  |
| ENSMUSG00000073631 | Gm10553       | 3.034637335 | 3.163502255 | 1.865059325 | 3.242056185  |
| ENSMUSG00000029377 | Ereg          | 1.769468296 | 3.164505851 | 2.263008064 | 1.962560253  |
| ENSMUSG00000019942 | Cdk1          | 2.038154334 | 3.169143553 | 1.510249955 | 3.290956098  |
| ENSMUSG00000046718 | Bst2          | 3.676376896 | 3.170551406 | 2.616565167 | 2.868281633  |
| ENSMUSG00000035365 | Parpbp        | 2.797866188 | 3.172335343 | 1.898182651 | 2.882416933  |
| ENSMUSG00000029605 | Oas1b         | 3.592617794 | 3.187966331 | 2.376835722 | 3.136458582  |
| ENSMUSG00000044313 | Mab2113       | 3.423586134 | 3.188411429 | 2.320008088 | 3.576393897  |
| ENSMUSG00000042730 | -             | 0.382771369 | 3.189537307 | -0.70030545 | 0.994524543  |
| ENSMUSG00000084197 | Gm9089        | 2.541740816 | 3.199330277 | 2.297771082 | -0.431899973 |
| ENSMUSG00000030144 | Clec4d        | 2.32729988  | 3.202937468 | 1.459391532 | 2.77959753   |
| ENSMUSG00000039396 | Neil3         | 1.073391578 | 3.205771017 | 0.35189247  | 2.784489307  |
| ENSMUSG00000044138 | -             | 3.006111913 | 3.206631657 | 1.32214154  | 2.595234364  |
| ENSMUSG00000034773 | BC030867      | 1.640133033 | 3.215167361 | 1.780700196 | 3.473237058  |
| ENSMUSG00000068744 | Psrc1         | 1.614194929 | 3.216555295 | 0.93273885  | 2.11570223   |
| ENSMUSG00000026475 | Rgs16         | 3.240228083 | 3.227054693 | 2.712216819 | 2.848055756  |
| ENSMUSG00000090939 | Gm17147       | 0.138725038 | 3.229715873 | 0.942206853 | 3.964304764  |
| ENSMUSG00000043740 | B430306N03Rik | 4.213335837 | 3.230032694 | 2.750091265 | 3.123694608  |
| ENSMUSG00000036223 | Ska1          | 1.754776467 | 3.264073865 | 1.387040817 | 2.811226459  |
| ENSMUSG00000075266 | Cenpw         | 0.407835897 | 3.264724038 | 0.128881701 | 3.259776913  |
| ENSMUSG00000005667 | Mthfd2        | 2.605060091 | 3.266449091 | 1.641985391 | 3.19866028   |
| ENSMUSG00000026573 | Xcl1          | 3.423908358 | 3.269722901 | 0.185321891 | 2.731020277  |
| ENSMUSG00000073554 | Gm6960        | 1.650694814 | 3.272802415 | 0.829408276 | 3.381133315  |
| ENSMUSG00000074026 | Gm6091        | 1.385394621 | 3.283401165 | 0.551340588 | 1.444476459  |
| ENSMUSG00000040613 | Apobec1       | 3.27349329  | 3.286122775 | 1.893717544 | 2.723304323  |
| ENSMUSG00000074151 | Nlrc5         | 3.177870791 | 3.287706587 | 1.62155852  | 3.170577371  |
| ENSMUSG00000029798 | Herc6         | 3.803495943 | 3.28890089  | 2.330786022 | 3.347198819  |
| ENSMUSG00000079419 | Ms4a6c        | 3.460306925 | 3.29399297  | 1.968704273 | 2.885667502  |
| ENSMUSG00000050014 | Apol10b       | 3.798135375 | 3.296149171 | 1.402082012 | 2.828211015  |
| ENSMUSG00000074677 | Sirpb1c       | 3.836814754 | 3.29715136  | 1.765538084 | 2.751834329  |
| ENSMUSG00000091553 | Serpina3e-ps  | 3.733158532 | 3.303937513 | 2.039739299 | 3.063087761  |
| ENSMUSG00000035683 | Melk          | 0.535105131 | 3.309478162 | 0.024767957 | 3.415361454  |
| ENSMUSG00000037321 | Tap1          | 2.791815899 | 3.310226889 | 1.373641464 | 3.154394693  |
| ENSMUSG00000062593 | Lilrb4        | 3.140161168 | 3.312473797 | 2.046385369 | 3.08474628   |
| ENSMUSG00000026177 | Slc11a1       | 2.730833287 | 3.319147752 | 1.532851104 | 2.283287675  |
| ENSMUSG00000029005 | Draxin        | 2.410190897 | 3.320085136 | 0.408690375 | 2.013252818  |
| ENSMUSG00000014686 | Ceacam16      | 2.794472721 | 3.320867464 | 2.741777754 | 2.181544004  |
| ENSMUSG00000091576 | Trim30b       | 3.57207228  | 3.328384143 | 1.900524621 | 3.21056435   |
| ENSMUSG00000068245 | D14Erttd668e  | 3.93313581  | 3.32897763  | 2.288323676 | 3.121458638  |
| ENSMUSG00000032783 | Troap         | 1.26380267  | 3.333276204 | 0.877400292 | 3.399858273  |
| ENSMUSG00000041064 | Pif1          | 0.01326978  | 3.33683033  | 0.868724885 | 2.266801594  |
| ENSMUSG00000043263 | Pyhin1        | 3.738297583 | 3.339193852 | 2.079965013 | 3.479378562  |
| ENSMUSG00000053318 | Slamf8        | 2.796964344 | 3.340526451 | 0.518979258 | 3.603013096  |
| ENSMUSG00000057135 | Scimp         | 3.572704328 | 3.340571802 | 1.947210061 | 3.418996355  |
| ENSMUSG00000049988 | Lrrc25        | 2.953854746 | 3.351117376 | 1.543486939 | 2.671117785  |
| ENSMUSG00000035208 | Slfn8         | 4.158395729 | 3.359538883 | 2.632668681 | 3.432928479  |
| ENSMUSG00000078860 | -             | 2.757614289 | 3.369407853 | 1.337197281 | 0            |

|                    |               |              |             |             |              |
|--------------------|---------------|--------------|-------------|-------------|--------------|
| ENSMUSG00000071716 | Apol7e        | 2.095623504  | 3.37738687  | 0.777951071 | 2.954008501  |
| ENSMUSG00000039699 | Batf2         | 2.702861784  | 3.392077706 | 1.015954382 | 3.400441493  |
| ENSMUSG00000054203 | Ifi205        | 3.28028129   | 3.394506933 | 1.702524999 | 3.070045955  |
| ENSMUSG00000029322 | Plac8         | 3.978002334  | 3.401038874 | 2.474206684 | 3.373416808  |
| ENSMUSG00000029380 | Cxcl1         | 5.19052012   | 3.402960566 | 4.158203232 | 3.742342395  |
| ENSMUSG00000079014 | Serpina3i     | 3.290810887  | 3.406994115 | 1.435613039 | 3.313978079  |
| ENSMUSG00000020638 | Cmpk2         | 4.130997531  | 3.408662485 | 2.546926752 | 3.618163992  |
| ENSMUSG00000067615 | Krt81         | 1.215226675  | 3.410403566 | 0.511752305 | 2.836945905  |
| ENSMUSG00000067555 | Gm10212       | 3.017528338  | 3.411208193 | 1.878033897 | 2.89882869   |
| ENSMUSG00000049037 | Clec4a1       | 3.342995418  | 3.411763876 | 1.934610591 | 2.71935198   |
| ENSMUSG00000024798 | Htr7          | 2.491901212  | 3.414829342 | 1.144755397 | 3.592398865  |
| ENSMUSG00000029371 | Cxcl5         | 3.881000095  | 3.41809753  | 3.101519016 | 4.535860819  |
| ENSMUSG00000078781 | -             | 3.489242419  | 3.425413655 | 1.508736127 | 2.866068435  |
| ENSMUSG00000078920 | Ifi47         | 3.268383876  | 3.425780925 | 1.558236721 | 3.474216746  |
| ENSMUSG00000069910 | Ccdc99        | 1.609940928  | 3.433577461 | 0.734559039 | 3.735259495  |
| ENSMUSG00000075031 | Hist1h2bb     | -1.117489026 | 3.438427477 | -1.71525951 | 0.850606729  |
| ENSMUSG00000081675 | Gm12712       | 1.503872982  | 3.443797584 | -0.42966845 | 0.934486308  |
| ENSMUSG00000030149 | Klrk1         | 3.417223601  | 3.445004294 | 1.528432789 | 2.939088047  |
| ENSMUSG00000038379 | Ttk           | 1.99053886   | 3.446217607 | 1.250775414 | 2.071693964  |
| ENSMUSG00000009185 | Ccl8          | 3.404949328  | 3.462910806 | 3.349059057 | 3.808538979  |
| ENSMUSG00000038304 | Cd160         | 1.474732052  | 3.465396267 | 1.151421732 | 2.582992528  |
| ENSMUSG00000025804 | Ccr1          | 2.830835092  | 3.468261646 | 1.681336497 | 1.77168035   |
| ENSMUSG00000058207 | Serpina3k     | 4.175749674  | 3.479932558 | 2.502987652 | 3.191468942  |
| ENSMUSG00000070501 | BC094916      | 3.656082556  | 3.483766898 | 2.074498725 | 3.668977956  |
| ENSMUSG00000028327 | 1300002K09Rik | 3.431160314  | 3.491442785 | 1.778599528 | 3.131960069  |
| ENSMUSG00000020651 | Slc26a4       | 4.076337038  | 3.492159636 | 2.764416247 | 3.81774071   |
| ENSMUSG00000023903 | Mmp25         | 1.999689375  | 3.497949659 | 1.329982466 | 3.494467665  |
| ENSMUSG00000005800 | Mmp8          | 4.005708414  | 3.505517185 | 1.571827681 | 0.600247964  |
| ENSMUSG00000026536 | Mnda          | 3.76691278   | 3.507626408 | 2.138479519 | 3.328994936  |
| ENSMUSG00000037725 | Ckap2         | 1.789195355  | 3.509898891 | 1.279747214 | 3.383051096  |
| ENSMUSG00000004296 | Il12b         | 5.75490136   | 3.511407939 | 2.202086978 | 3.302432754  |
| ENSMUSG00000078763 | Slfn1         | 4.149547283  | 3.515522066 | 2.534349911 | 3.292530173  |
| ENSMUSG00000001773 | Folh1         | 1.201956904  | 3.521806084 | 0.31414575  | -1.278980648 |
| ENSMUSG00000030187 | Klra2         | 5.136717878  | 3.526531026 | 2.787670001 | 2.724725174  |
| ENSMUSG00000045322 | Tlr9          | 4.12215089   | 3.541778742 | 2.372483748 | 1.791841057  |
| ENSMUSG00000053101 | Gpr141        | 4.624559744  | 3.545639282 | 2.036931373 | 3.032954509  |
| ENSMUSG00000089672 | Gp49a         | 3.242855732  | 3.549303056 | 1.956664302 | 3.239674374  |
| ENSMUSG00000033847 | Pla2g4c       | 2.513630093  | 3.550139675 | 0.650553935 | 3.891545126  |
| ENSMUSG00000068252 | Apol7b        | 2.390500565  | 3.553303669 | 1.215678005 | 3.233213835  |
| ENSMUSG00000090189 | -             | 3.680627292  | 3.55528239  | 2.746976681 | 3.931008524  |
| ENSMUSG00000084133 | Gm12856       | 1.390532784  | 3.56679107  | 0.628357545 | 3.736690414  |
| ENSMUSG00000073632 | -             | 3.556111168  | 3.567771817 | 2.360625844 | 3.712051931  |
| ENSMUSG00000091144 | Gm6907        | 3.991804565  | 3.616958417 | 2.394534521 | 3.625778704  |
| ENSMUSG00000022534 | Mefv          | 3.451864123  | 3.62526937  | 2.146430704 | 3.58688073   |
| ENSMUSG00000066867 | Oas1e         | 2.093563281  | 3.629235086 | -0.07489044 | 2.541999619  |
| ENSMUSG00000030124 | Lag3          | 2.362153464  | 3.630890139 | 1.826447394 | 3.425862766  |
| ENSMUSG00000024371 | C2            | 3.971738987  | 3.631772025 | 2.626240918 | 3.235077831  |
| ENSMUSG00000090894 | Olfr110       | 0.362366645  | 3.639744288 | 0.277164707 | 0.0128714    |



|                    |               |              |             |             |              |
|--------------------|---------------|--------------|-------------|-------------|--------------|
| ENSMUSG00000043811 | Rtn4r         | 0.429772615  | 3.645273338 | 0.369311566 | 3.203878496  |
| ENSMUSG00000074153 | -             | 3.185412692  | 3.646942698 | 2.08201028  | 3.67875203   |
| ENSMUSG00000073490 | AI607873      | 3.547181976  | 3.651167428 | 2.360188659 | 3.37551588   |
| ENSMUSG00000063660 | Olfcr98       | 2.505363612  | 3.65654103  | 0.136425334 | 3.396019774  |
| ENSMUSG00000022652 | Morc1         | 5.469607995  | 3.659437873 | 2.535214367 | 5.053092906  |
| ENSMUSG00000037544 | Dlgap5        | 1.776061641  | 3.665544064 | 1.661644007 | 3.977353622  |
| ENSMUSG00000083161 | Gm11427       | 5.147040087  | 3.667154798 | 3.530947078 | 3.486104884  |
| ENSMUSG00000028270 | Gbp2          | 3.308876492  | 3.671582891 | 1.044519985 | 3.654280618  |
| ENSMUSG00000069874 | Irgm2         | 3.076114689  | 3.675445057 | 1.439514407 | 3.730850574  |
| ENSMUSG00000067297 | 2010002M12Rik | 4.489299878  | 3.700240275 | 2.978408911 | 4.015552705  |
| ENSMUSG00000012519 | Mlkl          | 3.278439941  | 3.703910203 | 1.440253341 | 3.154242904  |
| ENSMUSG00000062488 | I830012O16Rik | 4.454108387  | 3.706366146 | 2.910343563 | 3.639421507  |
| ENSMUSG00000066364 | Serpina3b     | 3.407674951  | 3.708696532 | 1.141415709 | 3.422290354  |
| ENSMUSG00000028718 | Stil          | 1.287998013  | 3.727299598 | 1.356746984 | 3.776116475  |
| ENSMUSG00000018986 | Slfn3         | 4.774595382  | 3.736378799 | 3.05596403  | 3.70624689   |
| ENSMUSG00000073489 | Ifi204        | 4.080516719  | 3.750708817 | 2.450964599 | 3.563753547  |
| ENSMUSG00000056025 | Clca1         | 3.423828549  | 3.771599433 | 1.479656937 | 2.387181038  |
| ENSMUSG00000079339 | Gm14446       | 4.89671084   | 3.773834257 | 3.452645518 | 4.114969976  |
| ENSMUSG00000048852 | Gm12185       | 3.59217253   | 3.776546745 | 1.815495252 | 3.887764201  |
| ENSMUSG00000000791 | Il12rb1       | 2.4975315    | 3.786859935 | 1.334095894 | 3.259792225  |
| ENSMUSG00000026271 | Gpr35         | 3.047520239  | 3.790598883 | 1.863512742 | 3.664959574  |
| ENSMUSG00000079311 | Gm3222        | -0.340530889 | 3.79747731  | -0.79390762 | 1.001971113  |
| ENSMUSG00000047517 | Dmbt1         | 1.799635126  | 3.797669445 | 1.00159609  | 5.108631064  |
| ENSMUSG00000023045 | Soat2         | 3.818894141  | 3.801005246 | 2.954438247 | 3.222520829  |
| ENSMUSG00000089938 | Gm15744       | -1.266150865 | 3.810487683 | -0.37853216 | -0.898082172 |
| ENSMUSG00000079363 | Gbp4          | 2.510196509  | 3.811935802 | 0.311480205 | 3.557307307  |
| ENSMUSG00000006948 | Klk4          | 1.072119524  | 3.826443133 | 0.51457577  | 3.86563717   |
| ENSMUSG00000030107 | Usp18         | 4.487440996  | 3.832795297 | 3.062845817 | 3.89213283   |
| ENSMUSG00000060802 | B2m           | 2.759495585  | 3.838166115 | 1.063792827 | 1.137441102  |
| ENSMUSG00000035186 | Ubd           | 3.186277202  | 3.843011136 | 1.379040579 | 3.491958505  |
| ENSMUSG00000071552 | Tigit         | 4.651349494  | 3.867316755 | 4.119615583 | 3.509925966  |
| ENSMUSG00000021091 | Serpina3n     | 3.946796107  | 3.876002267 | 3.165436725 | 3.380345334  |
| ENSMUSG00000037033 | Clca4         | 4.093967528  | 3.883567442 | 3.591715939 | 4.144567919  |
| ENSMUSG00000017830 | Dhx58         | 4.016481897  | 3.889848786 | 2.769682311 | 3.632278128  |
| ENSMUSG00000034438 | Gbp8          | 2.849825947  | 3.905366665 | 0.607208983 | 3.839488175  |
| ENSMUSG00000091649 | Gm4902        | 4.529440726  | 3.916976092 | 2.674843184 | 3.754978269  |
| ENSMUSG00000041481 | Serpina3g     | 3.837811969  | 3.926642638 | 1.540148756 | 3.655714634  |
| ENSMUSG00000079012 | Serpina3m     | 4.47585607   | 3.927409216 | 3.526880196 | 3.37484555   |
| ENSMUSG00000024672 | Ms4a7         | 4.227079554  | 3.942702334 | 2.703910222 | 3.22875625   |
| ENSMUSG00000028217 | Cdh17         | 1.869442274  | 3.953146187 | 0.583195505 | 5.371150193  |
| ENSMUSG00000090556 | Olfcr753-ps1  | 2.957856114  | 3.954829923 | -1.40499581 | 3.394907041  |
| ENSMUSG00000048621 | Gm6377        | 2.637839068  | 3.9644982   | 1.044983181 | 1.784844222  |
| ENSMUSG00000046591 | Ticrr         | 1.552826234  | 3.965445586 | 1.032012061 | 4.011378374  |
| ENSMUSG00000028269 | Gbp1          | 3.444526893  | 3.966465617 | 0.993871912 | 3.961639583  |
| ENSMUSG00000002847 | Pla1a         | 3.215093179  | 3.968878836 | 0.937076951 | 2.332416253  |
| ENSMUSG00000066363 | Serpina3f     | 3.828877986  | 3.970244001 | 1.634823876 | 3.721759303  |
| ENSMUSG00000024397 | Aif1          | 3.785430988  | 3.977137495 | 2.226881463 | 3.53247517   |
| ENSMUSG00000078521 | Aunip         | 2.532098535  | 3.985490835 | 0.990241142 | 3.84701657   |

|                    |               |             |             |             |              |
|--------------------|---------------|-------------|-------------|-------------|--------------|
| ENSMUSG00000048574 | Gm5593        | 1.51460797  | 3.989827441 | 0.995849302 | 4.082120276  |
| ENSMUSG00000044703 | Phf11         | 4.569228415 | 4.005585244 | 2.717715572 | 3.920118872  |
| ENSMUSG00000033576 | Apol6         | 2.376372606 | 4.005591813 | 0.608083693 | 3.455058113  |
| ENSMUSG00000073090 | Gm7932        | 1.732785828 | 4.018260895 | 0.676799067 | 4.024853344  |
| ENSMUSG00000074896 | Ifit3         | 4.712314421 | 4.021332375 | 3.100054573 | 3.870064666  |
| ENSMUSG00000028268 | Gbp3          | 3.570849181 | 4.021950773 | 1.672639112 | 3.981600572  |
| ENSMUSG00000035818 | 9930023K05Rik | 3.610317531 | 4.037045094 | 3.588040163 | 2.388616653  |
| ENSMUSG00000032690 | Oas2          | 4.520495913 | 4.053017658 | 3.667475226 | 3.957066822  |
| ENSMUSG00000031762 | Mt2           | 2.643853797 | 4.060624194 | 2.509980291 | 3.568959265  |
| ENSMUSG00000090881 | Gm6904        | 4.918227354 | 4.069568063 | 3.009711525 | 3.986438389  |
| ENSMUSG00000045932 | Ifit2         | 5.151889782 | 4.075219644 | 2.728756446 | 3.86823402   |
| ENSMUSG00000078236 | -             | 3.589729738 | 4.075317688 | 1.523370784 | 3.484561836  |
| ENSMUSG00000090125 | Pou3f1        | 3.589272452 | 4.076301897 | 1.522673804 | 3.487265575  |
| ENSMUSG00000059179 | Gm8991        | 2.104943546 | 4.085407924 | 0.984766623 | 4.391262401  |
| ENSMUSG00000057346 | Apol9b        | 4.168150169 | 4.089178947 | 2.92095222  | 3.793321298  |
| ENSMUSG00000083249 | Gm14623       | 0           | 4.095105817 | 0           | 0            |
| ENSMUSG00000049916 | 2610318N02Rik | 0.183612076 | 4.095610742 | 0.123602014 | 4.546375546  |
| ENSMUSG00000029561 | Oas12         | 3.934390913 | 4.102190312 | 2.710124687 | 3.931992512  |
| ENSMUSG00000078616 | Trim30c       | 5.470618592 | 4.103375507 | 3.670035605 | 4.511897659  |
| ENSMUSG00000020641 | Rsad2         | 6.616465906 | 4.113581616 | 4.646471701 | 4.20940434   |
| ENSMUSG00000018486 | Wnt9b         | 0.503419022 | 4.115845479 | -0.12882275 | 1.841731042  |
| ENSMUSG00000013643 | Lypd8         | 3.94623766  | 4.132595913 | 4.400830605 | 4.744116217  |
| ENSMUSG00000018907 | Alox12e       | 1.073464855 | 4.151014415 | 0.908420757 | 3.775324747  |
| ENSMUSG00000026285 | Pdcd1         | 2.192570322 | 4.154263033 | 1.766929992 | 3.956658509  |
| ENSMUSG00000023151 | Lrrc69        | 0.106668853 | 4.167941354 | 0           | -0.096658708 |
| ENSMUSG00000090231 | Cfb           | 4.813602344 | 4.170875534 | 3.403259354 | 3.804952265  |
| ENSMUSG00000037145 | 2210407C18Rik | 1.08719804  | 4.171526163 | 0.988449111 | 5.127420607  |
| ENSMUSG00000052212 | Cd177         | 5.172152471 | 4.198998785 | 4.398627557 | 4.245405331  |
| ENSMUSG00000045587 | BC049730      | 5.214278409 | 4.21416985  | 4.714305918 | 4.700656165  |
| ENSMUSG00000031898 | Dpep3         | 1.748452885 | 4.223933422 | 0.352883173 | 2.518403263  |
| ENSMUSG00000044201 | Cdc25c        | 2.09972864  | 4.225096383 | 1.141132053 | 4.619413156  |
| ENSMUSG00000026535 | Ifi202b       | 4.013066326 | 4.228013525 | 2.273437872 | 4.06665823   |
| ENSMUSG00000063388 | BC023105      | 5.172476068 | 4.238673186 | 2.277945955 | 4.84392889   |
| ENSMUSG00000082116 | Gm12188       | 3.275642123 | 4.251700472 | 2.194284985 | 4.275006616  |
| ENSMUSG00000037628 | Cdkn3         | 1.790093337 | 4.251978572 | 1.277387196 | 3.164168771  |
| ENSMUSG00000078921 | Tgtp2         | 3.436613425 | 4.25696572  | 1.680427881 | 4.361602866  |
| ENSMUSG00000026981 | Il1rn         | 3.541349444 | 4.26582573  | 2.085400287 | 4.321981329  |
| ENSMUSG00000022026 | Olfm4         | 1.991262149 | 4.277559277 | 1.504469694 | 3.538794005  |
| ENSMUSG00000024679 | Ms4a6d        | 4.525196697 | 4.287331256 | 3.011287224 | 3.954538921  |
| ENSMUSG00000031098 | Syt8          | 1.707650841 | 4.28795211  | 2.344436091 | 3.984580363  |
| ENSMUSG00000026011 | Ctla4         | 3.051423498 | 4.288395979 | 2.147152286 | 4.428123611  |
| ENSMUSG00000078853 | Igtp          | 3.496609411 | 4.288727888 | 1.791912652 | 4.298133724  |
| ENSMUSG00000046879 | Irgm1         | 3.769934744 | 4.294891718 | 2.066273834 | 4.137511397  |
| ENSMUSG00000025044 | Msr1          | 3.764069321 | 4.31087926  | 2.148659371 | 3.963172544  |
| ENSMUSG00000090942 | F830016B08Rik | 4.525822373 | 4.342506427 | 2.571687715 | 4.254600914  |
| ENSMUSG00000027379 | Bub1          | 1.649180788 | 4.343253494 | 0.466596915 | 4.546747022  |
| ENSMUSG00000016529 | Il10          | 2.299560862 | 4.360252521 | 0.897797432 | 4.392136915  |
| ENSMUSG00000029379 | Cxcl3         | 7.06843363  | 4.378061697 | 5.584160511 | 4.675407659  |

|                    |              |             |             |             |             |
|--------------------|--------------|-------------|-------------|-------------|-------------|
| ENSMUSG0000000817  | Fasl         | 2.380096508 | 4.379310112 | 1.353742077 | 4.124808985 |
| ENSMUSG00000078922 | Tgtp1        | 3.550434542 | 4.384424092 | 1.772417172 | 4.502316964 |
| ENSMUSG00000092021 | Gbp11        | 3.335142672 | 4.384448035 | 1.164972525 | 4.18814226  |
| ENSMUSG00000082292 | Gm12250      | 3.597985753 | 4.38834381  | 1.722720822 | 4.443021369 |
| ENSMUSG00000034459 | Ifit1        | 4.918661501 | 4.395545209 | 3.346286398 | 4.616270379 |
| ENSMUSG00000057596 | Trim30d      | 5.102585943 | 4.398772547 | 2.987664503 | 4.277790552 |
| ENSMUSG00000066861 | Oas1g        | 3.497547952 | 4.420556667 | 2.041165293 | 3.31978139  |
| ENSMUSG00000022322 | Shcbp1       | 1.26686504  | 4.43669171  | -0.05815014 | 4.595082871 |
| ENSMUSG00000068246 | Apol9a       | 4.232474284 | 4.440423943 | 2.982289271 | 4.117697224 |
| ENSMUSG00000058717 | Gm4763       | 2.653864858 | 4.450556113 | 2.238150956 | 4.255343451 |
| ENSMUSG00000034987 | Hrh2         | 3.050400273 | 4.452175533 | 2.10561366  | 6.479219478 |
| ENSMUSG00000016496 | Cd274        | 3.752327953 | 4.463668168 | 1.275868622 | 4.297703714 |
| ENSMUSG00000070427 | Il18bp       | 4.099736528 | 4.488978941 | 1.909010366 | 4.052582038 |
| ENSMUSG00000001131 | Timp1        | 5.819121091 | 4.510629018 | 5.136144979 | 2.94170068  |
| ENSMUSG00000046031 | Fam26f       | 5.087021013 | 4.510809733 | 2.192691435 | 4.511886729 |
| ENSMUSG00000023341 | Mx2          | 4.905096892 | 4.569021652 | 3.533356985 | 4.718591876 |
| ENSMUSG00000039364 | Sectm1b      | 8.627200838 | 4.591313419 | 7.965709015 | 4.799935872 |
| ENSMUSG00000085164 | -            | 4.698492583 | 4.602661473 | 3.210620897 | 4.238056919 |
| ENSMUSG00000038037 | Socs1        | 3.658016955 | 4.611361762 | 2.2033132   | 4.516085683 |
| ENSMUSG00000006403 | Adamts4      | 4.673391231 | 4.619731638 | 4.01495766  | 4.379180932 |
| ENSMUSG00000073555 | Gm4951       | 4.669909008 | 4.626081326 | 2.561524581 | 4.514854682 |
| ENSMUSG00000040552 | C3ar1        | 4.602201057 | 4.638424768 | 2.610586512 | 3.474154454 |
| ENSMUSG00000044165 | Bcl2l15      | 2.804240666 | 4.64328886  | 1.314727049 | 3.053566275 |
| ENSMUSG00000079013 | Serpina3j    | 4.690599127 | 4.653058761 | 3.221193267 | 4.23425375  |
| ENSMUSG00000024675 | Ms4a4c       | 5.022628072 | 4.654453653 | 3.048309506 | 4.309666854 |
| ENSMUSG00000079362 | Gbp6         | 3.527147635 | 4.675506775 | 1.343273758 | 4.580922977 |
| ENSMUSG00000091157 | Serpina3l-ps | 5.026963002 | 4.687797951 | 3.592734834 | 4.434260526 |
| ENSMUSG00000046845 | Il1f10       | 0           | 4.698424087 | 0           | 0           |
| ENSMUSG00000016498 | Pdcd1lg2     | 2.705190182 | 4.699540968 | 2.025597293 | 4.758033242 |
| ENSMUSG00000044162 | Tnip3        | 6.686562245 | 4.717831592 | 5.49999861  | 4.224833759 |
| ENSMUSG00000026358 | Rgs1         | 4.412791435 | 4.721938816 | 2.946046271 | 3.812111985 |
| ENSMUSG00000026166 | Ccl20        | 4.694698513 | 4.736375033 | 3.870766819 | 4.074638565 |
| ENSMUSG00000039146 | H28          | 5.194416325 | 4.750556985 | 3.200914882 | 4.669274149 |
| ENSMUSG00000085977 | Gm5970       | 4.983222145 | 4.75702677  | 2.956660332 | 4.570014411 |
| ENSMUSG00000000247 | Lhx2         | 4.661883573 | 4.759788097 | 2.408070957 | 4.268165323 |
| ENSMUSG00000028965 | Tnfrsf9      | 4.335496284 | 4.760283847 | 2.973145845 | 4.562809462 |
| ENSMUSG00000083885 | Gm13213      | 2.184239083 | 4.791240019 | 1.167182118 | 1.986657712 |
| ENSMUSG00000056494 | Cngb3        | 1.171290107 | 4.793247456 | 0.19261965  | 2.538700776 |
| ENSMUSG00000038067 | Csf3         | 6.644540617 | 4.793307599 | 5.852086318 | 4.4112702   |
| ENSMUSG00000035692 | Isg15        | 5.229906738 | 4.847203055 | 3.898397395 | 4.802480021 |
| ENSMUSG00000050370 | Ch25h        | 4.880609209 | 4.932807552 | 3.453807991 | 4.784704957 |
| ENSMUSG00000026822 | Lcn2         | 5.063977773 | 4.957621284 | 3.797908029 | 4.630836707 |
| ENSMUSG00000024401 | Tnf          | 4.012909399 | 4.960913432 | 2.439699804 | 4.805977366 |
| ENSMUSG00000034730 | Bai1         | 3.809895086 | 4.970666999 | 1.813444527 | 3.849784294 |
| ENSMUSG00000091824 | -            | 5.363727157 | 4.982285362 | 2.765438356 | 4.18704     |
| ENSMUSG00000015947 | Fcgr1        | 5.300079561 | 4.986049303 | 3.600211675 | 4.415510228 |
| ENSMUSG00000070778 | Rpl7a-ps8    | 2.67677317  | 5.014369839 | -0.14665263 | 1.009186526 |
| ENSMUSG00000053338 | Tarm1        | 2.585382832 | 5.036867868 | 0.09752517  | 5.35510463  |

|                    |               |              |             |             |             |
|--------------------|---------------|--------------|-------------|-------------|-------------|
| ENSMUSG00000040264 | Gbp5          | 4.750811673  | 5.047864312 | 2.068101514 | 4.907038148 |
| ENSMUSG00000041827 | Oas11         | 5.22282845   | 5.063222314 | 3.770126172 | 5.173586214 |
| ENSMUSG00000079597 | Gm5483        | 5.473447706  | 5.099067921 | 3.184094852 | 3.303736549 |
| ENSMUSG00000028037 | Ifi44         | 5.442029223  | 5.11155823  | 3.560243702 | 4.968367674 |
| ENSMUSG00000047197 | Gjd3          | 3.349592976  | 5.111879045 | 2.87771648  | 4.264391804 |
| ENSMUSG00000054588 | Gbp10         | 3.864125778  | 5.116682305 | 1.551918629 | 4.909075155 |
| ENSMUSG00000058427 | Cxcl2         | 5.282454271  | 5.120601732 | 4.782911179 | 4.745278985 |
| ENSMUSG00000079227 | Ccr5          | 4.128895248  | 5.195410293 | 2.486852367 | 3.094081428 |
| ENSMUSG00000042385 | Gzmk          | 2.68252282   | 5.213697366 | 1.723253729 | 4.076930605 |
| ENSMUSG00000070524 | Fcrlb         | 3.876102199  | 5.227114402 | 0.712233984 | 5.178354288 |
| ENSMUSG00000054072 | Iigp1         | 4.454401195  | 5.29725879  | 2.260127636 | 5.178471819 |
| ENSMUSG00000000204 | Slfn4         | 6.305377029  | 5.350232339 | 4.521158054 | 5.094078504 |
| ENSMUSG00000059089 | Fcgr4         | 4.35014077   | 5.373192631 | 2.353745148 | 4.893616379 |
| ENSMUSG00000027514 | Zbp1          | 5.318744156  | 5.453170568 | 3.688447515 | 5.274317547 |
| ENSMUSG00000025498 | Irf7          | 5.392277818  | 5.561626912 | 4.077569812 | 5.163252562 |
| ENSMUSG00000063234 | Gpr84         | 6.941010486  | 5.572059608 | 5.083046232 | 5.70556489  |
| ENSMUSG00000032661 | Oas3          | 5.692483338  | 5.588069063 | 4.10259459  | 5.156112811 |
| ENSMUSG00000071311 | Gpr31b        | 6.315426333  | 5.606453207 | 3.744188693 | 4.856991755 |
| ENSMUSG00000035352 | Ccl12         | 4.953037305  | 5.744812349 | 3.60424098  | 5.749193024 |
| ENSMUSG00000015437 | Gzmb          | 3.790998127  | 5.746503677 | 1.9631898   | 5.102199742 |
| ENSMUSG00000068606 | Gm4841        | 5.943272355  | 5.857085117 | 3.54775462  | 5.953733619 |
| ENSMUSG00000000386 | Mx1           | 6.412416799  | 5.899084454 | 4.582947666 | 5.907964452 |
| ENSMUSG00000082131 | -             | -0.826635936 | 5.918464422 | 3.357640023 | 1.00650983  |
| ENSMUSG00000082748 | -             | -0.826635936 | 5.918464422 | -1.91236789 | 0.029058356 |
| ENSMUSG00000024786 | 1700123I01Rik | 4.533357971  | 5.926786516 | 2.247509097 | 4.799646719 |
| ENSMUSG00000048031 | Fcrl5         | 1.827325302  | 6.04644595  | -0.26363772 | 5.045015023 |
| ENSMUSG00000045027 | Prss22        | 5.095429201  | 6.237117185 | 4.957291689 | 5.632026118 |
| ENSMUSG00000031551 | Ido1          | 7.098142272  | 6.362763823 | 2.497903023 | 6.100300927 |
| ENSMUSG00000003555 | Cyp17a1       | 0            | 6.427817323 | 0           | 0.889134938 |
| ENSMUSG00000000982 | Ccl3          | 6.113465179  | 6.47155938  | 5.101554119 | 5.627421162 |
| ENSMUSG00000029417 | Cxcl9         | 5.614594957  | 7.121729261 | 3.248339533 | 7.20839688  |
| ENSMUSG00000018930 | Ccl4          | 6.552448392  | 7.27855129  | 4.755509095 | 6.793284219 |
| ENSMUSG00000035373 | Ccl7          | 6.46797104   | 7.330710982 | 5.12462868  | 7.386936701 |
| ENSMUSG00000025165 | Sectm1a       | 7.579445382  | 7.481087058 | 6.284434392 | 7.045293091 |
| ENSMUSG00000027670 | Ocstamp       | 5.65618598   | 7.489991867 | 3.667725433 | 7.169962921 |
| ENSMUSG00000055170 | Ifng          | 4.867481576  | 7.749999768 | 0.95665031  | 7.254588912 |
| ENSMUSG00000035385 | Ccl2          | 6.150871116  | 7.770060916 | 4.669265037 | 7.482848315 |
| ENSMUSG00000079186 | Gzmc          | 3.006084758  | 7.834205876 | 2.173657288 | 4.107104898 |
| ENSMUSG00000082976 | Gm15056       | 5.124377768  | 7.866976983 | 3.34336518  | 7.507383108 |
| ENSMUSG00000074115 | Saa1          | 7.830060209  | 7.89707669  | 5.822140188 | 7.590709027 |
| ENSMUSG00000022126 | Irg1          | 8.534669131  | 8.493591582 | 6.55932073  | 8.394126411 |
| ENSMUSG00000034855 | Cxcl10        | 8.202354846  | 9.073811865 | 5.840047953 | 9.324561336 |
| ENSMUSG00000040026 | Saa3          | 10.38155485  | 9.298371217 | 6.311413194 | 7.531918016 |

note:blue color reprints downregulated genes;

red color represents upregulated genes;

blank color represents different changing trend in Jia6/10 and LN/10 infection group on day 3 and day5.

**Table S4. Gene ontology (GO) analysis of differentially expressed genes after virus infection**

| GO ID                     | GO Term                            | Up-regulated genes |              |                                                                                                                                                                                                                                                                                                                                                                                                                                                                                                                                                                                                                                                                                                                                                                                                            | Down-regulated genes |              |                                                                                                                                             |
|---------------------------|------------------------------------|--------------------|--------------|------------------------------------------------------------------------------------------------------------------------------------------------------------------------------------------------------------------------------------------------------------------------------------------------------------------------------------------------------------------------------------------------------------------------------------------------------------------------------------------------------------------------------------------------------------------------------------------------------------------------------------------------------------------------------------------------------------------------------------------------------------------------------------------------------------|----------------------|--------------|---------------------------------------------------------------------------------------------------------------------------------------------|
|                           |                                    | Corrected p-value  | No. of genes | Gene list                                                                                                                                                                                                                                                                                                                                                                                                                                                                                                                                                                                                                                                                                                                                                                                                  | Corrected p-value    | No. of genes | Gene list                                                                                                                                   |
| <b>Biological Process</b> |                                    |                    |              |                                                                                                                                                                                                                                                                                                                                                                                                                                                                                                                                                                                                                                                                                                                                                                                                            |                      |              |                                                                                                                                             |
| GO:0002694                | regulation of leukocyte activation | 3.61E-09           | 39           | ENSMUSG00000036931, ENSMUSG00000040528, ENSMUSG00000073412, ENSMUSG00000049103, ENSMUSG00000016529, ENSMUSG00000038179, ENSMUSG00000035385, ENSMUSG00000075122, ENSMUSG00000028874, ENSMUSG00000030365, ENSMUSG00000026011, ENSMUSG00000020053, ENSMUSG00000034652, ENSMUSG00000027398, ENSMUSG00000031551, ENSMUSG00000026770, ENSMUSG00000025473, ENSMUSG00000016496, ENSMUSG00000044701, ENSMUSG00000055170, ENSMUSG00000001444, ENSMUSG00000027843, ENSMUSG00000055994, ENSMUSG00000035042, ENSMUSG00000058715, ENSMUSG00000071552, ENSMUSG00000026573, ENSMUSG00000004296, ENSMUSG00000000791, ENSMUSG00000022901, ENSMUSG00000026656, ENSMUSG00000029075, ENSMUSG00000037440, ENSMUSG00000030124, ENSMUSG00000016498, ENSMUSG00000022876, ENSMUSG00000024397, ENSMUSG00000048806, ENSMUSG00000025746 | 1                    | 7            | ENSMUSG00000063632, ENSMUSG00000042812, ENSMUSG00000025889, ENSMUSG00000024653, ENSMUSG00000024028, ENSMUSG00000026532, ENSMUSG000000017697 |

|            |                                                                                                                |                 |    |                                                                                                                                                                                                                                                                                                                                                                           |             |    |                                                                                                                                                                                                                                                                                      |
|------------|----------------------------------------------------------------------------------------------------------------|-----------------|----|---------------------------------------------------------------------------------------------------------------------------------------------------------------------------------------------------------------------------------------------------------------------------------------------------------------------------------------------------------------------------|-------------|----|--------------------------------------------------------------------------------------------------------------------------------------------------------------------------------------------------------------------------------------------------------------------------------------|
| GO:0052169 | pathogen-associated<br>molecular pattern dependent<br>modulation by symbiont of<br>host innate immune response | 0.00351362<br>7 | 5  | ENSMUSG00000027995, ENSMUSG00000045322,<br>ENSMUSG00000044583, ENSMUSG00000051498,<br>ENSMUSG00000055994                                                                                                                                                                                                                                                                  | 1           | 0  |                                                                                                                                                                                                                                                                                      |
| GO:0032680 | regulation of tumor necrosis<br>factor production                                                              | 7.65E-07        | 17 | ENSMUSG00000055170, ENSMUSG00000028602,<br>ENSMUSG00000027995, ENSMUSG00000045322,<br>ENSMUSG00000055994, ENSMUSG00000058715,<br>ENSMUSG00000030525, ENSMUSG00000051439,<br>ENSMUSG00000049103, ENSMUSG00000016529,<br>ENSMUSG00000000982, ENSMUSG0000004296,<br>ENSMUSG00000053175, ENSMUSG00000044827,<br>ENSMUSG00000018930, ENSMUSG00000079227,<br>ENSMUSG00000030921 | 1           | 2  | ENSMUSG00000022878, ENSMUSG00000024526                                                                                                                                                                                                                                               |
| GO:0060415 | muscle tissue morphogenesis                                                                                    | 1               | 0  |                                                                                                                                                                                                                                                                                                                                                                           | 0.000780233 | 13 | ENSMUSG00000035458, ENSMUSG00000032366,<br>ENSMUSG00000027470, ENSMUSG00000046714,<br>ENSMUSG00000059741, ENSMUSG00000091898,<br>ENSMUSG00000053093, ENSMUSG00000006235,<br>ENSMUSG00000026418, ENSMUSG00000007877,<br>ENSMUSG00000021909, ENSMUSG00000040289,<br>ENSMUSG00000040752 |
| GO:0002698 | negative regulation of<br>immune effector process                                                              | 1.05E-05        | 15 | ENSMUSG00000026656, ENSMUSG00000050241,<br>ENSMUSG00000055994, ENSMUSG00000079298,<br>ENSMUSG00000079620, ENSMUSG00000026573,<br>ENSMUSG00000048806, ENSMUSG00000024339,<br>ENSMUSG00000034652, ENSMUSG00000049103,<br>ENSMUSG00000073406, ENSMUSG00000037321,                                                                                                            | 1           | 0  |                                                                                                                                                                                                                                                                                      |

|            |                                  |   |   |                                                                                                                                                                                               |             |    |                                                                                                                                                                                                                                                                                                                                                                                                                                                                                                                                                                                                                                                                                                                                                                                                                                                                                                                                                                                                                                                                   |
|------------|----------------------------------|---|---|-----------------------------------------------------------------------------------------------------------------------------------------------------------------------------------------------|-------------|----|-------------------------------------------------------------------------------------------------------------------------------------------------------------------------------------------------------------------------------------------------------------------------------------------------------------------------------------------------------------------------------------------------------------------------------------------------------------------------------------------------------------------------------------------------------------------------------------------------------------------------------------------------------------------------------------------------------------------------------------------------------------------------------------------------------------------------------------------------------------------------------------------------------------------------------------------------------------------------------------------------------------------------------------------------------------------|
|            |                                  |   |   | ENSMUSG00000030111, ENSMUSG00000034459,<br>ENSMUSG00000026770                                                                                                                                 |             |    |                                                                                                                                                                                                                                                                                                                                                                                                                                                                                                                                                                                                                                                                                                                                                                                                                                                                                                                                                                                                                                                                   |
| GO:0044255 | cellular lipid metabolic process | 1 | 9 | ENSMUSG00000023913, ENSMUSG00000033847,<br>ENSMUSG0000003484, ENSMUSG00000028751,<br>ENSMUSG00000017146, ENSMUSG00000050370,<br>ENSMUSG00000021322, ENSMUSG00000018907,<br>ENSMUSG00000023045 | 0.008245682 | 49 | ENSMUSG00000037686, ENSMUSG00000032203,<br>ENSMUSG00000033327, ENSMUSG00000032262,<br>ENSMUSG00000025889, ENSMUSG00000062515,<br>ENSMUSG00000046402, ENSMUSG0000002588,<br>ENSMUSG00000013418, ENSMUSG00000032454,<br>ENSMUSG00000032310, ENSMUSG00000027513,<br>ENSMUSG00000032807, ENSMUSG00000031760,<br>ENSMUSG00000067653, ENSMUSG00000037071,<br>ENSMUSG00000028773, ENSMUSG00000032649,<br>ENSMUSG00000025202, ENSMUSG00000025153,<br>ENSMUSG00000073424, ENSMUSG00000022878,<br>ENSMUSG00000078597, ENSMUSG00000032349,<br>ENSMUSG00000059201, ENSMUSG00000066072,<br>ENSMUSG00000023019, ENSMUSG0000004885,<br>ENSMUSG00000030972, ENSMUSG00000032908,<br>ENSMUSG00000025991, ENSMUSG00000032315,<br>ENSMUSG0000000049, ENSMUSG00000090150,<br>ENSMUSG00000022040, ENSMUSG00000052131,<br>ENSMUSG00000024990, ENSMUSG00000032081,<br>ENSMUSG00000032083, ENSMUSG00000030747,<br>ENSMUSG00000075217, ENSMUSG00000028167,<br>ENSMUSG00000031425, ENSMUSG00000041220,<br>ENSMUSG00000050195, ENSMUSG00000020532,<br>ENSMUSG00000041653, ENSMUSG00000027380, |

|            |                                |          |    |                                                                                                                                                                                                                                                                                                                                                                                                                                                                                                                                                                                                                                                                                                                                                                                                                                                                                                                                                                                                                                                |   |                    |                                                                                                                                                                                                                                                                           |
|------------|--------------------------------|----------|----|------------------------------------------------------------------------------------------------------------------------------------------------------------------------------------------------------------------------------------------------------------------------------------------------------------------------------------------------------------------------------------------------------------------------------------------------------------------------------------------------------------------------------------------------------------------------------------------------------------------------------------------------------------------------------------------------------------------------------------------------------------------------------------------------------------------------------------------------------------------------------------------------------------------------------------------------------------------------------------------------------------------------------------------------|---|--------------------|---------------------------------------------------------------------------------------------------------------------------------------------------------------------------------------------------------------------------------------------------------------------------|
|            |                                |          |    |                                                                                                                                                                                                                                                                                                                                                                                                                                                                                                                                                                                                                                                                                                                                                                                                                                                                                                                                                                                                                                                |   | ENSMUSG00000012187 |                                                                                                                                                                                                                                                                           |
| GO:0031347 | regulation of defense response | 7.16E-19 | 50 | <p>ENSMUSG00000074151, ENSMUSG00000027995, ENSMUSG00000035673, ENSMUSG00000029377, ENSMUSG00000049103, ENSMUSG00000016529, ENSMUSG00000073406, ENSMUSG00000030413, ENSMUSG00000022906, ENSMUSG00000028874, ENSMUSG00000040296, ENSMUSG00000025804, ENSMUSG00000027398, ENSMUSG00000030895, ENSMUSG00000051498, ENSMUSG00000027639, ENSMUSG00000079227, ENSMUSG00000037321, ENSMUSG00000031551, ENSMUSG00000034459, ENSMUSG00000026770, ENSMUSG00000025473, ENSMUSG00000005696, ENSMUSG00000045322, ENSMUSG00000022548, ENSMUSG000000055994, ENSMUSG00000035042, ENSMUSG00000058715, ENSMUSG00000030149, ENSMUSG00000024349, ENSMUSG00000030525, ENSMUSG00000026573, ENSMUSG00000021322, ENSMUSG00000000982, ENSMUSG00000004296, ENSMUSG00000000791, ENSMUSG00000015947, ENSMUSG00000022901, ENSMUSG00000026656, ENSMUSG00000050241, ENSMUSG00000029371, ENSMUSG00000030124, ENSMUSG00000079298, ENSMUSG00000036986, ENSMUSG00000024401, ENSMUSG00000024339, ENSMUSG00000025746, ENSMUSG00000044583, ENSMUSG00000030111, ENSMUSG00000042726</p> | 1 | 13                 | <p>ENSMUSG00000042812, ENSMUSG00000022868, ENSMUSG00000019326, ENSMUSG00000062515, ENSMUSG00000024653, ENSMUSG00000043496, ENSMUSG00000017697, ENSMUSG00000026715, ENSMUSG00000024028, ENSMUSG00000031980, ENSMUSG00000022878, ENSMUSG00000032076, ENSMUSG00000010047</p> |



|            |                                  |                 |    |                                                                                                                                                                                                                                                                                                                                                                                                                                                                                                                                                                                                                                                                       |   |    |                                                                                                                                                                                                                                                                                                                                       |
|------------|----------------------------------|-----------------|----|-----------------------------------------------------------------------------------------------------------------------------------------------------------------------------------------------------------------------------------------------------------------------------------------------------------------------------------------------------------------------------------------------------------------------------------------------------------------------------------------------------------------------------------------------------------------------------------------------------------------------------------------------------------------------|---|----|---------------------------------------------------------------------------------------------------------------------------------------------------------------------------------------------------------------------------------------------------------------------------------------------------------------------------------------|
| GO:0010564 | regulation of cell cycle process | 0.00025071<br>9 | 32 | <p>ENSMUSG00000017716, ENSMUSG00000058755, ENSMUSG00000024791, ENSMUSG00000027699, ENSMUSG00000029377, ENSMUSG00000026605, ENSMUSG00000068744, ENSMUSG00000019942, ENSMUSG00000045328, ENSMUSG00000030268, ENSMUSG00000017146, ENSMUSG00000027379, ENSMUSG00000027469, ENSMUSG00000020053, ENSMUSG00000027398, ENSMUSG00000029414, ENSMUSG00000042489, ENSMUSG00000035186, ENSMUSG00000041431, ENSMUSG00000027306, ENSMUSG00000023015, ENSMUSG00000037474, ENSMUSG00000020897, ENSMUSG00000017499, ENSMUSG00000039981, ENSMUSG00000034394, ENSMUSG00000030867, ENSMUSG00000036986, ENSMUSG00000024401, ENSMUSG00000024397, ENSMUSG00000072082, ENSMUSG00000032218</p> | 1 | 11 | <p>ENSMUSG00000022996, ENSMUSG00000010051, ENSMUSG0000005373, ENSMUSG00000035486, ENSMUSG0000007815, ENSMUSG00000025862, ENSMUSG00000036867, ENSMUSG00000042903, ENSMUSG00000032315, ENSMUSG0000001403, ENSMUSG00000023092</p>                                                                                                        |
| GO:0009607 | response to biotic stimulus      | 5.59E-40        | 92 | <p>ENSMUSG00000060802, ENSMUSG00000027995, ENSMUSG00000035692, ENSMUSG00000066861, ENSMUSG00000079563, ENSMUSG00000061232, ENSMUSG00000016529, ENSMUSG00000053977, ENSMUSG00000029605, ENSMUSG00000070034, ENSMUSG00000040253, ENSMUSG00000023341, ENSMUSG00000040296, ENSMUSG00000025804, ENSMUSG00000046718, ENSMUSG00000051498, ENSMUSG00000045932, ENSMUSG00000054072, ENSMUSG00000034855, ENSMUSG00000031551,</p>                                                                                                                                                                                                                                                | 1 | 16 | <p>ENSMUSG00000020889, ENSMUSG00000031495, ENSMUSG00000025889, ENSMUSG00000034783, ENSMUSG00000010051, ENSMUSG00000079278, ENSMUSG00000035486, ENSMUSG00000059230, ENSMUSG00000028036, ENSMUSG00000015405, ENSMUSG00000037071, ENSMUSG00000036216, ENSMUSG00000025991, ENSMUSG00000056978, ENSMUSG00000035459, ENSMUSG00000010047</p> |

|  |  |  |  |                                                                                                                                                                                                                                                                                                                                                                                                                                                                                                                                                                                                                                                                                                                                                                                                                                                                                                                                                                                                                                                                                                                                                          |  |  |  |
|--|--|--|--|----------------------------------------------------------------------------------------------------------------------------------------------------------------------------------------------------------------------------------------------------------------------------------------------------------------------------------------------------------------------------------------------------------------------------------------------------------------------------------------------------------------------------------------------------------------------------------------------------------------------------------------------------------------------------------------------------------------------------------------------------------------------------------------------------------------------------------------------------------------------------------------------------------------------------------------------------------------------------------------------------------------------------------------------------------------------------------------------------------------------------------------------------------|--|--|--|
|  |  |  |  | ENSMUSG00000039236, ENSMUSG00000069874,<br>ENSMUSG00000045322, ENSMUSG00000025492,<br>ENSMUSG00000079362, ENSMUSG00000055994,<br>ENSMUSG00000030149, ENSMUSG00000028270,<br>ENSMUSG00000038357, ENSMUSG00000026896,<br>ENSMUSG0000000982, ENSMUSG00000053175,<br>ENSMUSG00000025498, ENSMUSG00000026656,<br>ENSMUSG0000003283, ENSMUSG00000028268,<br>ENSMUSG00000022622, ENSMUSG00000079017,<br>ENSMUSG00000048806, ENSMUSG00000000386,<br>ENSMUSG00000044583, ENSMUSG00000022126,<br>ENSMUSG00000053219, ENSMUSG00000024079,<br>ENSMUSG00000027832, ENSMUSG00000040613,<br>ENSMUSG00000026822, ENSMUSG00000058427,<br>ENSMUSG00000060747, ENSMUSG00000029417,<br>ENSMUSG00000038209, ENSMUSG00000029298,<br>ENSMUSG00000051439, ENSMUSG00000037202,<br>ENSMUSG00000035385, ENSMUSG00000032691,<br>ENSMUSG00000020641, ENSMUSG00000020638,<br>ENSMUSG00000030413, ENSMUSG00000028874,<br>ENSMUSG00000029915, ENSMUSG00000027398,<br>ENSMUSG00000059089, ENSMUSG00000027639,<br>ENSMUSG00000079227, ENSMUSG00000027514,<br>ENSMUSG00000034459, ENSMUSG00000028362,<br>ENSMUSG00000055170, ENSMUSG00000028269,<br>ENSMUSG00000026104, ENSMUSG00000035042, |  |  |  |
|--|--|--|--|----------------------------------------------------------------------------------------------------------------------------------------------------------------------------------------------------------------------------------------------------------------------------------------------------------------------------------------------------------------------------------------------------------------------------------------------------------------------------------------------------------------------------------------------------------------------------------------------------------------------------------------------------------------------------------------------------------------------------------------------------------------------------------------------------------------------------------------------------------------------------------------------------------------------------------------------------------------------------------------------------------------------------------------------------------------------------------------------------------------------------------------------------------|--|--|--|

|            |                       |          |    |                                                                                                                                                                                                                                                                                                                                                                                                                                                                                                                                |   |   |                                        |
|------------|-----------------------|----------|----|--------------------------------------------------------------------------------------------------------------------------------------------------------------------------------------------------------------------------------------------------------------------------------------------------------------------------------------------------------------------------------------------------------------------------------------------------------------------------------------------------------------------------------|---|---|----------------------------------------|
|            |                       |          |    | ENSMUSG00000056529, ENSMUSG00000058715,<br>ENSMUSG00000024349, ENSMUSG00000026573,<br>ENSMUSG00000076612, ENSMUSG00000004296,<br>ENSMUSG00000015947, ENSMUSG00000022901,<br>ENSMUSG00000044827, ENSMUSG00000041515,<br>ENSMUSG00000023078, ENSMUSG00000029371,<br>ENSMUSG00000032661, ENSMUSG00000036986,<br>ENSMUSG00000024401, ENSMUSG00000054588,<br>ENSMUSG00000024339, ENSMUSG00000025746,<br>ENSMUSG00000041347, ENSMUSG00000026177                                                                                      |   |   |                                        |
| GO:0042110 | T cell activation     | 6.72E-05 | 24 | ENSMUSG00000055170, ENSMUSG00000060802,<br>ENSMUSG00000074148, ENSMUSG00000027843,<br>ENSMUSG0000001444, ENSMUSG00000071005,<br>ENSMUSG00000071068, ENSMUSG00000030525,<br>ENSMUSG00000026573, ENSMUSG00000018899,<br>ENSMUSG00000004296, ENSMUSG00000053977,<br>ENSMUSG00000053175, ENSMUSG00000022901,<br>ENSMUSG00000029075, ENSMUSG00000062007,<br>ENSMUSG00000030786, ENSMUSG00000034116,<br>ENSMUSG00000038418, ENSMUSG00000025746,<br>ENSMUSG00000059089, ENSMUSG00000049109,<br>ENSMUSG00000026177, ENSMUSG00000028362 | 1 | 2 | ENSMUSG00000061311, ENSMUSG00000017697 |
| GO:0048247 | lymphocyte chemotaxis | 7.07E-08 | 9  | ENSMUSG00000050232, ENSMUSG00000023078,<br>ENSMUSG00000035042, ENSMUSG00000026573,<br>ENSMUSG00000049103, ENSMUSG00000074115,<br>ENSMUSG00000000982, ENSMUSG00000035385,                                                                                                                                                                                                                                                                                                                                                       | 1 | 0 |                                        |

|            |                                                       |                 |    |                                                                                                                                                                                                                                                                                                                                                                                                                                    |             |    |                                                                                                                                                                                                                                                                                                                                                                                                                                                                                                                                                            |
|------------|-------------------------------------------------------|-----------------|----|------------------------------------------------------------------------------------------------------------------------------------------------------------------------------------------------------------------------------------------------------------------------------------------------------------------------------------------------------------------------------------------------------------------------------------|-------------|----|------------------------------------------------------------------------------------------------------------------------------------------------------------------------------------------------------------------------------------------------------------------------------------------------------------------------------------------------------------------------------------------------------------------------------------------------------------------------------------------------------------------------------------------------------------|
|            |                                                       |                 |    | ENSMUSG00000025473                                                                                                                                                                                                                                                                                                                                                                                                                 |             |    |                                                                                                                                                                                                                                                                                                                                                                                                                                                                                                                                                            |
| GO:0010466 | negative regulation of peptidase activity             | 0.18103012<br>1 | 21 | ENSMUSG00000017716, ENSMUSG00000074148, ENSMUSG00000029664, ENSMUSG00000066363, ENSMUSG00000021403, ENSMUSG00000041481, ENSMUSG00000059657, ENSMUSG00000068129, ENSMUSG00000041536, ENSMUSG00000001131, ENSMUSG00000058207, ENSMUSG00000079597, ENSMUSG00000079012, ENSMUSG00000061947, ENSMUSG00000025746, ENSMUSG00000020053, ENSMUSG00000066364, ENSMUSG00000021091, ENSMUSG00000030111, ENSMUSG00000066361, ENSMUSG00000051949 | 0.000347907 | 27 | ENSMUSG00000025860, ENSMUSG00000055653, ENSMUSG00000022868, ENSMUSG00000025889, ENSMUSG00000026715, ENSMUSG00000090877, ENSMUSG00000044594, ENSMUSG00000058017, ENSMUSG00000039278, ENSMUSG00000061311, ENSMUSG00000026874, ENSMUSG00000059956, ENSMUSG00000067006, ENSMUSG00000023336, ENSMUSG00000031760, ENSMUSG00000026327, ENSMUSG00000028356, ENSMUSG00000030359, ENSMUSG00000058260, ENSMUSG00000055561, ENSMUSG00000022871, ENSMUSG00000019278, ENSMUSG00000070531, ENSMUSG00000027442, ENSMUSG00000032060, ENSMUSG00000036867, ENSMUSG00000031980 |
| GO:0032946 | positive regulation of mononuclear cell proliferation | 0.00828999      | 15 | ENSMUSG00000055170, ENSMUSG00000029075, ENSMUSG00000075122, ENSMUSG00000035042, ENSMUSG00000016498, ENSMUSG00000024397, ENSMUSG00000026573, ENSMUSG00000020053, ENSMUSG00000025746, ENSMUSG00000027398, ENSMUSG00000049103, ENSMUSG00000004296, ENSMUSG00000000791, ENSMUSG00000026770, ENSMUSG00000022901                                                                                                                         | 1           | 2  | ENSMUSG00000026532, ENSMUSG00000017697                                                                                                                                                                                                                                                                                                                                                                                                                                                                                                                     |
| GO:0003208 | cardiac ventricle morphogenesis                       | 1               | 0  |                                                                                                                                                                                                                                                                                                                                                                                                                                    | 0.001186552 | 13 | ENSMUSG00000042812, ENSMUSG00000035458, ENSMUSG00000032366, ENSMUSG00000046714, ENSMUSG00000059741, ENSMUSG00000063632,                                                                                                                                                                                                                                                                                                                                                                                                                                    |

|            |                              |   |    |                                                                                                                                                                                                                                                                                                                                                                                                |          |                                                                                                                                                    |                                                                                                                                                                                                                                                                                                                                                                                                                                                                                                                                                                                                                                                                                                                                                                                                                                                                                                                                                                               |
|------------|------------------------------|---|----|------------------------------------------------------------------------------------------------------------------------------------------------------------------------------------------------------------------------------------------------------------------------------------------------------------------------------------------------------------------------------------------------|----------|----------------------------------------------------------------------------------------------------------------------------------------------------|-------------------------------------------------------------------------------------------------------------------------------------------------------------------------------------------------------------------------------------------------------------------------------------------------------------------------------------------------------------------------------------------------------------------------------------------------------------------------------------------------------------------------------------------------------------------------------------------------------------------------------------------------------------------------------------------------------------------------------------------------------------------------------------------------------------------------------------------------------------------------------------------------------------------------------------------------------------------------------|
|            |                              |   |    |                                                                                                                                                                                                                                                                                                                                                                                                |          | ENSMUSG00000091898, ENSMUSG00000053093,<br>ENSMUSG0000006235, ENSMUSG00000026418,<br>ENSMUSG00000021909, ENSMUSG00000040289,<br>ENSMUSG00000040752 |                                                                                                                                                                                                                                                                                                                                                                                                                                                                                                                                                                                                                                                                                                                                                                                                                                                                                                                                                                               |
| GO:0044057 | regulation of system process | 1 | 18 | ENSMUSG00000055170, ENSMUSG00000038642,<br>ENSMUSG00000030525, ENSMUSG00000016529,<br>ENSMUSG00000035385, ENSMUSG00000000982,<br>ENSMUSG00000006398, ENSMUSG00000028072,<br>ENSMUSG00000045471, ENSMUSG00000034394,<br>ENSMUSG00000024401, ENSMUSG00000038418,<br>ENSMUSG00000024397, ENSMUSG00000025746,<br>ENSMUSG00000020053, ENSMUSG00000027398,<br>ENSMUSG00000059089, ENSMUSG00000041324 | 3.04E-06 | 47                                                                                                                                                 | ENSMUSG00000020123, ENSMUSG00000030302,<br>ENSMUSG00000030730, ENSMUSG00000032366,<br>ENSMUSG00000025889, ENSMUSG00000007122,<br>ENSMUSG00000032511, ENSMUSG00000029236,<br>ENSMUSG00000090877, ENSMUSG00000020524,<br>ENSMUSG00000090639, ENSMUSG00000032554,<br>ENSMUSG00000033577, ENSMUSG00000024534,<br>ENSMUSG00000021909, ENSMUSG00000024028,<br>ENSMUSG00000033208, ENSMUSG00000061086,<br>ENSMUSG00000048142, ENSMUSG00000017697,<br>ENSMUSG00000036867, ENSMUSG00000037010,<br>ENSMUSG00000029361, ENSMUSG00000073465,<br>ENSMUSG00000024027, ENSMUSG00000022878,<br>ENSMUSG00000040752, ENSMUSG00000064179,<br>ENSMUSG00000059201, ENSMUSG00000035458,<br>ENSMUSG00000031214, ENSMUSG00000027470,<br>ENSMUSG00000027077, ENSMUSG00000091898,<br>ENSMUSG00000025991, ENSMUSG00000053093,<br>ENSMUSG0000000889, ENSMUSG00000038239,<br>ENSMUSG00000061723, ENSMUSG00000031144,<br>ENSMUSG00000031097, ENSMUSG00000032356,<br>ENSMUSG00000032083, ENSMUSG00000049281, |

|            |                                        |             |    |                                                                                                                                                                                                                                                                                                                                                                                                                                                                                                                                                                                                                                                                                                                                                                                                    |   |   |                                                                                                                                                                                                |
|------------|----------------------------------------|-------------|----|----------------------------------------------------------------------------------------------------------------------------------------------------------------------------------------------------------------------------------------------------------------------------------------------------------------------------------------------------------------------------------------------------------------------------------------------------------------------------------------------------------------------------------------------------------------------------------------------------------------------------------------------------------------------------------------------------------------------------------------------------------------------------------------------------|---|---|------------------------------------------------------------------------------------------------------------------------------------------------------------------------------------------------|
|            |                                        |             |    |                                                                                                                                                                                                                                                                                                                                                                                                                                                                                                                                                                                                                                                                                                                                                                                                    |   |   | ENSMUSG00000059741, ENSMUSG00000026418,<br>ENSMUSG00000031980                                                                                                                                  |
| GO:002709  | regulation of T cell mediated immunity | 0.000421958 | 11 | ENSMUSG00000073411, ENSMUSG00000060802,<br>ENSMUSG00000055994, ENSMUSG00000079620,<br>ENSMUSG00000024339, ENSMUSG00000048806,<br>ENSMUSG00000026573, ENSMUSG00000061232,<br>ENSMUSG00000004296, ENSMUSG00000037321,<br>ENSMUSG00000067212                                                                                                                                                                                                                                                                                                                                                                                                                                                                                                                                                          | 1 | 0 |                                                                                                                                                                                                |
| GO:0022403 | cell cycle phase                       | 3.26E-15    | 63 | ENSMUSG00000017716, ENSMUSG00000015880,<br>ENSMUSG00000024791, ENSMUSG00000007080,<br>ENSMUSG00000050107, ENSMUSG00000045273,<br>ENSMUSG00000024989, ENSMUSG00000029377,<br>ENSMUSG00000026605, ENSMUSG00000068744,<br>ENSMUSG00000019942, ENSMUSG00000045328,<br>ENSMUSG00000006398, ENSMUSG00000031004,<br>ENSMUSG00000028873, ENSMUSG00000002055,<br>ENSMUSG00000033644, ENSMUSG00000027379,<br>ENSMUSG00000024056, ENSMUSG00000027469,<br>ENSMUSG00000027331, ENSMUSG00000027715,<br>ENSMUSG00000036912, ENSMUSG00000041324,<br>ENSMUSG00000029414, ENSMUSG00000044201,<br>ENSMUSG00000024014, ENSMUSG00000026683,<br>ENSMUSG00000023505, ENSMUSG00000050957,<br>ENSMUSG00000039748, ENSMUSG00000026039,<br>ENSMUSG00000041431, ENSMUSG00000040084,<br>ENSMUSG00000036223, ENSMUSG00000027306, | 1 | 9 | ENSMUSG00000022996, ENSMUSG00000062380,<br>ENSMUSG00000031176, ENSMUSG00000036782,<br>ENSMUSG00000042903, ENSMUSG00000025862,<br>ENSMUSG00000007815, ENSMUSG00000001403,<br>ENSMUSG00000071470 |

|            |                    |          |    |                                                                                                                                                                                                                                                                                                                                                                                                                                                                                                                                                                                                                                    |   |   |                                                                                                                                                                                       |
|------------|--------------------|----------|----|------------------------------------------------------------------------------------------------------------------------------------------------------------------------------------------------------------------------------------------------------------------------------------------------------------------------------------------------------------------------------------------------------------------------------------------------------------------------------------------------------------------------------------------------------------------------------------------------------------------------------------|---|---|---------------------------------------------------------------------------------------------------------------------------------------------------------------------------------------|
|            |                    |          |    | <p>ENSMUSG00000037313, ENSMUSG00000024795,<br/> ENSMUSG00000023015, ENSMUSG00000078763,<br/> ENSMUSG00000069910, ENSMUSG00000025001,<br/> ENSMUSG00000048922, ENSMUSG00000051378,<br/> ENSMUSG00000020897, ENSMUSG00000031898,<br/> ENSMUSG00000017499, ENSMUSG00000020415,<br/> ENSMUSG00000071350, ENSMUSG00000037544,<br/> ENSMUSG00000028678, ENSMUSG00000030867,<br/> ENSMUSG00000012443, ENSMUSG00000028068,<br/> ENSMUSG00000074476, ENSMUSG00000017861,<br/> ENSMUSG00000023940, ENSMUSG00000072082,<br/> ENSMUSG00000026779, ENSMUSG00000033952,<br/> ENSMUSG00000058290, ENSMUSG00000032218,<br/> ENSMUSG00000027496</p> |   |   |                                                                                                                                                                                       |
| GO:0000278 | mitotic cell cycle | 8.67E-15 | 54 | <p>ENSMUSG00000017716, ENSMUSG00000015880,<br/> ENSMUSG00000024791, ENSMUSG0000007080,<br/> ENSMUSG00000050107, ENSMUSG00000045273,<br/> ENSMUSG00000024989, ENSMUSG00000026605,<br/> ENSMUSG00000068744, ENSMUSG00000019942,<br/> ENSMUSG00000045328, ENSMUSG00000006398,<br/> ENSMUSG00000028873, ENSMUSG00000002055,<br/> ENSMUSG00000027379, ENSMUSG00000024056,<br/> ENSMUSG00000027469, ENSMUSG00000027331,<br/> ENSMUSG00000027715, ENSMUSG00000041324,<br/> ENSMUSG00000029414, ENSMUSG00000044201,<br/> ENSMUSG00000024014, ENSMUSG00000026683,</p>                                                                       | 1 | 8 | <p>ENSMUSG00000007815, ENSMUSG00000025862,<br/> ENSMUSG00000042903, ENSMUSG00000022996,<br/> ENSMUSG00000001403, ENSMUSG00000062380,<br/> ENSMUSG000000031176, ENSMUSG00000036782</p> |

|            |                        |          |    |                                                                                                                                                                                                                                                                                                                                                                                                                                                                                                                                                                                                                                                                                 |   |   |  |
|------------|------------------------|----------|----|---------------------------------------------------------------------------------------------------------------------------------------------------------------------------------------------------------------------------------------------------------------------------------------------------------------------------------------------------------------------------------------------------------------------------------------------------------------------------------------------------------------------------------------------------------------------------------------------------------------------------------------------------------------------------------|---|---|--|
|            |                        |          |    | ENSMUSG00000023505, ENSMUSG000000041431,<br>ENSMUSG00000040084, ENSMUSG000000036223,<br>ENSMUSG00000027306, ENSMUSG000000023015,<br>ENSMUSG00000024795, ENSMUSG000000078763,<br>ENSMUSG00000069910, ENSMUSG000000025001,<br>ENSMUSG00000048922, ENSMUSG000000051378,<br>ENSMUSG00000020897, ENSMUSG000000017499,<br>ENSMUSG00000071350, ENSMUSG000000020415,<br>ENSMUSG00000037544, ENSMUSG000000028678,<br>ENSMUSG00000012443, ENSMUSG000000030867,<br>ENSMUSG00000074476, ENSMUSG000000028068,<br>ENSMUSG00000017861, ENSMUSG000000023940,<br>ENSMUSG00000072082, ENSMUSG000000026779,<br>ENSMUSG00000033952, ENSMUSG000000058290,<br>ENSMUSG00000032218, ENSMUSG000000027496 |   |   |  |
| GO:0007059 | chromosome segregation | 1.68E-07 | 23 | ENSMUSG00000017716, ENSMUSG000000026683,<br>ENSMUSG00000015880, ENSMUSG000000024791,<br>ENSMUSG00000050107, ENSMUSG000000045273,<br>ENSMUSG00000026039, ENSMUSG000000041431,<br>ENSMUSG00000036223, ENSMUSG000000026605,<br>ENSMUSG00000027306, ENSMUSG00000069910,<br>ENSMUSG00000068744, ENSMUSG000000045328,<br>ENSMUSG00000071350, ENSMUSG000000017146,<br>ENSMUSG00000020415, ENSMUSG000000028678,<br>ENSMUSG00000002055, ENSMUSG000000027379,<br>ENSMUSG00000024056, ENSMUSG000000023940,                                                                                                                                                                                 | 1 | 0 |  |



|            |                                                      |          |    |                                                                                                                                                                                                                                                                                                                                                                                            |          |    |                                                                                                                                                                                                                                                                                                                                                                                                                                                                                                                                                                                                    |
|------------|------------------------------------------------------|----------|----|--------------------------------------------------------------------------------------------------------------------------------------------------------------------------------------------------------------------------------------------------------------------------------------------------------------------------------------------------------------------------------------------|----------|----|----------------------------------------------------------------------------------------------------------------------------------------------------------------------------------------------------------------------------------------------------------------------------------------------------------------------------------------------------------------------------------------------------------------------------------------------------------------------------------------------------------------------------------------------------------------------------------------------------|
|            |                                                      |          |    | ENSMUSG00000058290                                                                                                                                                                                                                                                                                                                                                                         |          |    |                                                                                                                                                                                                                                                                                                                                                                                                                                                                                                                                                                                                    |
| GO:0060537 | muscle tissue development                            | 1        | 2  | ENSMUSG00000022587, ENSMUSG00000020053                                                                                                                                                                                                                                                                                                                                                     | 9.14E-05 | 29 | ENSMUSG00000009471, ENSMUSG00000021506, ENSMUSG00000035458, ENSMUSG00000032366, ENSMUSG00000027470, ENSMUSG00000035606, ENSMUSG00000052911, ENSMUSG00000031274, ENSMUSG00000032340, ENSMUSG00000046714, ENSMUSG00000007815, ENSMUSG00000091898, ENSMUSG00000030672, ENSMUSG00000053093, ENSMUSG00000021909, ENSMUSG00000031972, ENSMUSG00000024990, ENSMUSG00000022996, ENSMUSG00000045103, ENSMUSG00000059741, ENSMUSG00000026459, ENSMUSG00000049641, ENSMUSG00000006235, ENSMUSG00000026418, ENSMUSG00000007877, ENSMUSG00000031980, ENSMUSG00000040289, ENSMUSG00000038119, ENSMUSG00000040752 |
| GO:0044403 | symbiosis, encompassing mutualism through parasitism | 1.18E-07 | 19 | ENSMUSG00000027995, ENSMUSG00000028269, ENSMUSG00000045322, ENSMUSG00000079362, ENSMUSG00000035042, ENSMUSG00000055994, ENSMUSG00000028270, ENSMUSG00000029298, ENSMUSG00000038357, ENSMUSG00000000982, ENSMUSG00000018930, ENSMUSG00000028268, ENSMUSG00000040253, ENSMUSG00000024339, ENSMUSG00000044583, ENSMUSG00000051498, ENSMUSG00000037321, ENSMUSG00000079227, ENSMUSG00000034459 | 1        | 5  | ENSMUSG00000039952, ENSMUSG00000029368, ENSMUSG00000032216, ENSMUSG00000010047, ENSMUSG00000015405                                                                                                                                                                                                                                                                                                                                                                                                                                                                                                 |

|            |                        |          |    |                                                                                                                                                                                                                                                                                                                                                                                                                                                                                                                                                                                                                                                                                                                                                                                                                                                                     |   |    |                                                                                                                                                                                                                                                                                                                              |
|------------|------------------------|----------|----|---------------------------------------------------------------------------------------------------------------------------------------------------------------------------------------------------------------------------------------------------------------------------------------------------------------------------------------------------------------------------------------------------------------------------------------------------------------------------------------------------------------------------------------------------------------------------------------------------------------------------------------------------------------------------------------------------------------------------------------------------------------------------------------------------------------------------------------------------------------------|---|----|------------------------------------------------------------------------------------------------------------------------------------------------------------------------------------------------------------------------------------------------------------------------------------------------------------------------------|
| GO:0006935 | chemotaxis             | 4.13E-07 | 37 | <p>ENSMUSG00000035352, ENSMUSG00000048534,<br/> ENSMUSG00000058427, ENSMUSG00000029379,<br/> ENSMUSG00000071005, ENSMUSG00000009185,<br/> ENSMUSG00000049103, ENSMUSG00000074115,<br/> ENSMUSG00000035385, ENSMUSG00000017724,<br/> ENSMUSG00000050232, ENSMUSG00000026166,<br/> ENSMUSG00000028072, ENSMUSG00000018930,<br/> ENSMUSG00000030786, ENSMUSG00000000247,<br/> ENSMUSG00000025804, ENSMUSG00000027398,<br/> ENSMUSG00000034855, ENSMUSG00000025473,<br/> ENSMUSG00000029005, ENSMUSG00000018920,<br/> ENSMUSG00000055170, ENSMUSG00000035042,<br/> ENSMUSG00000056529, ENSMUSG00000058715,<br/> ENSMUSG00000070691, ENSMUSG00000030077,<br/> ENSMUSG00000026573, ENSMUSG00000040552,<br/> ENSMUSG00000035373, ENSMUSG00000029304,<br/> ENSMUSG00000000982, ENSMUSG00000023078,<br/> ENSMUSG00000037868, ENSMUSG00000029380,<br/> ENSMUSG00000079700</p> | 1 | 10 | <p>ENSMUSG00000031380, ENSMUSG00000025810,<br/> ENSMUSG00000032547, ENSMUSG00000062380,<br/> ENSMUSG00000052911, ENSMUSG00000031780,<br/> ENSMUSG00000041012, ENSMUSG00000023235,<br/> ENSMUSG00000026874, ENSMUSG00000041688</p>                                                                                            |
| GO:0051704 | multi-organism process | 4.25E-30 | 95 | <p>ENSMUSG00000060802, ENSMUSG00000027995,<br/> ENSMUSG00000035692, ENSMUSG00000066861,<br/> ENSMUSG00000079563, ENSMUSG00000061232,<br/> ENSMUSG00000016529, ENSMUSG00000053977,<br/> ENSMUSG00000018930, ENSMUSG00000029605,<br/> ENSMUSG00000070034, ENSMUSG00000040253,<br/> ENSMUSG00000023341, ENSMUSG00000040296,</p>                                                                                                                                                                                                                                                                                                                                                                                                                                                                                                                                        | 1 | 24 | <p>ENSMUSG00000020123, ENSMUSG00000031495,<br/> ENSMUSG00000029368, ENSMUSG00000025889,<br/> ENSMUSG00000034783, ENSMUSG00000046532,<br/> ENSMUSG00000024039, ENSMUSG00000059230,<br/> ENSMUSG00000036216, ENSMUSG00000025991,<br/> ENSMUSG00000039952, ENSMUSG00000035459,<br/> ENSMUSG00000021319, ENSMUSG00000031996,</p> |

|  |  |  |                                                                                                                                                                                                                                                                                                                                                                                                                                                                                                                                                                                                                                                                                                                                                                                                                                                                                                                                                                                                                                                                                                                                                           |  |  |                                                                                                                                                                                                                    |
|--|--|--|-----------------------------------------------------------------------------------------------------------------------------------------------------------------------------------------------------------------------------------------------------------------------------------------------------------------------------------------------------------------------------------------------------------------------------------------------------------------------------------------------------------------------------------------------------------------------------------------------------------------------------------------------------------------------------------------------------------------------------------------------------------------------------------------------------------------------------------------------------------------------------------------------------------------------------------------------------------------------------------------------------------------------------------------------------------------------------------------------------------------------------------------------------------|--|--|--------------------------------------------------------------------------------------------------------------------------------------------------------------------------------------------------------------------|
|  |  |  | ENSMUSG00000025804, ENSMUSG00000046718,<br>ENSMUSG00000051498, ENSMUSG00000045932,<br>ENSMUSG00000054072, ENSMUSG00000037321,<br>ENSMUSG00000034855, ENSMUSG00000031551,<br>ENSMUSG00000039236, ENSMUSG00000069874,<br>ENSMUSG00000045322, ENSMUSG00000025492,<br>ENSMUSG00000079362, ENSMUSG00000055994,<br>ENSMUSG00000030149, ENSMUSG00000028270,<br>ENSMUSG00000038357, ENSMUSG00000026896,<br>ENSMUSG00000000982, ENSMUSG00000053175,<br>ENSMUSG00000025498, ENSMUSG00000026656,<br>ENSMUSG0000003283, ENSMUSG00000028268,<br>ENSMUSG00000079017, ENSMUSG00000048806,<br>ENSMUSG00000000386, ENSMUSG00000044583,<br>ENSMUSG00000022126, ENSMUSG00000053219,<br>ENSMUSG00000024079, ENSMUSG00000027832,<br>ENSMUSG00000040613, ENSMUSG00000026822,<br>ENSMUSG00000058427, ENSMUSG00000060747,<br>ENSMUSG00000029417, ENSMUSG00000038209,<br>ENSMUSG00000029298, ENSMUSG00000051439,<br>ENSMUSG00000037202, ENSMUSG00000035385,<br>ENSMUSG00000032691, ENSMUSG00000020641,<br>ENSMUSG00000020638, ENSMUSG00000030413,<br>ENSMUSG00000028874, ENSMUSG00000029915,<br>ENSMUSG00000027398, ENSMUSG00000059089,<br>ENSMUSG00000027639, ENSMUSG00000079227, |  |  | ENSMUSG00000020889, ENSMUSG00000010051,<br>ENSMUSG00000032216, ENSMUSG00000037071,<br>ENSMUSG00000015405, ENSMUSG00000028036,<br>ENSMUSG00000056978, ENSMUSG00000006235,<br>ENSMUSG00000057880, ENSMUSG00000010047 |
|--|--|--|-----------------------------------------------------------------------------------------------------------------------------------------------------------------------------------------------------------------------------------------------------------------------------------------------------------------------------------------------------------------------------------------------------------------------------------------------------------------------------------------------------------------------------------------------------------------------------------------------------------------------------------------------------------------------------------------------------------------------------------------------------------------------------------------------------------------------------------------------------------------------------------------------------------------------------------------------------------------------------------------------------------------------------------------------------------------------------------------------------------------------------------------------------------|--|--|--------------------------------------------------------------------------------------------------------------------------------------------------------------------------------------------------------------------|

|            |                               |          |    |                                                                                                                                                                                                                                                                                                                                                                                                                                                                                                                                                                                                                                                                                |   |   |                                                                                                                                                                                                               |
|------------|-------------------------------|----------|----|--------------------------------------------------------------------------------------------------------------------------------------------------------------------------------------------------------------------------------------------------------------------------------------------------------------------------------------------------------------------------------------------------------------------------------------------------------------------------------------------------------------------------------------------------------------------------------------------------------------------------------------------------------------------------------|---|---|---------------------------------------------------------------------------------------------------------------------------------------------------------------------------------------------------------------|
|            |                               |          |    | <p>ENSMUSG00000027514, ENSMUSG00000034459,<br/> ENSMUSG00000028362, ENSMUSG00000055170,<br/> ENSMUSG00000028269, ENSMUSG00000026104,<br/> ENSMUSG00000035042, ENSMUSG00000056529,<br/> ENSMUSG00000058715, ENSMUSG00000024349,<br/> ENSMUSG00000026573, ENSMUSG00000076612,<br/> ENSMUSG0000004296, ENSMUSG00000015947,<br/> ENSMUSG00000022901, ENSMUSG00000044827,<br/> ENSMUSG00000041515, ENSMUSG00000023078,<br/> ENSMUSG00000029371, ENSMUSG00000032661,<br/> ENSMUSG00000034394, ENSMUSG00000036986,<br/> ENSMUSG00000024401, ENSMUSG00000054588,<br/> ENSMUSG00000024339, ENSMUSG00000025746,<br/> ENSMUSG00000041347, ENSMUSG00000030111,<br/> ENSMUSG00000026177</p> |   |   |                                                                                                                                                                                                               |
| GO:0050776 | regulation of immune response | 3.00E-25 | 64 | <p>ENSMUSG00000060802, ENSMUSG00000074151,<br/> ENSMUSG00000036905, ENSMUSG00000074148,<br/> ENSMUSG00000027995, ENSMUSG00000036887,<br/> ENSMUSG00000029377, ENSMUSG00000049103,<br/> ENSMUSG00000061232, ENSMUSG00000016529,<br/> ENSMUSG00000073406, ENSMUSG00000053063,<br/> ENSMUSG00000073411, ENSMUSG00000030413,<br/> ENSMUSG00000022906, ENSMUSG00000028874,<br/> ENSMUSG00000030365, ENSMUSG00000026011,<br/> ENSMUSG00000025804, ENSMUSG00000034652,<br/> ENSMUSG00000030895, ENSMUSG00000051498,</p>                                                                                                                                                               | 1 | 9 | <p>ENSMUSG00000042812, ENSMUSG00000061780,<br/> ENSMUSG00000043496, ENSMUSG00000032083,<br/> ENSMUSG00000017697, ENSMUSG00000090877,<br/> ENSMUSG00000046834, ENSMUSG00000026874,<br/> ENSMUSG00000032076</p> |

|            |                             |                 |    |                                                                                                                                                                                                                                                                                                                                                                                                                                                                                                                                                                                                                                                                                                                                                                                                                                                                                                                                                                                   |   |   |  |
|------------|-----------------------------|-----------------|----|-----------------------------------------------------------------------------------------------------------------------------------------------------------------------------------------------------------------------------------------------------------------------------------------------------------------------------------------------------------------------------------------------------------------------------------------------------------------------------------------------------------------------------------------------------------------------------------------------------------------------------------------------------------------------------------------------------------------------------------------------------------------------------------------------------------------------------------------------------------------------------------------------------------------------------------------------------------------------------------|---|---|--|
|            |                             |                 |    | <p>ENSMUSG00000027639, ENSMUSG00000037321,<br/> ENSMUSG00000031551, ENSMUSG00000026770,<br/> ENSMUSG00000067212, ENSMUSG00000025473,<br/> ENSMUSG00000005696, ENSMUSG00000044701,<br/> ENSMUSG00000055170, ENSMUSG00000045322,<br/> ENSMUSG00000001444, ENSMUSG00000027843,<br/> ENSMUSG00000092005, ENSMUSG00000040751,<br/> ENSMUSG00000055994, ENSMUSG00000058715,<br/> ENSMUSG00000030149, ENSMUSG00000024349,<br/> ENSMUSG00000040552, ENSMUSG00000026573,<br/> ENSMUSG00000024371, ENSMUSG00000004296,<br/> ENSMUSG00000000791, ENSMUSG00000055172,<br/> ENSMUSG00000015947, ENSMUSG00000022901,<br/> ENSMUSG00000026656, ENSMUSG00000050241,<br/> ENSMUSG00000030124, ENSMUSG00000079298,<br/> ENSMUSG00000079620, ENSMUSG00000024401,<br/> ENSMUSG00000090231, ENSMUSG00000022876,<br/> ENSMUSG00000048806, ENSMUSG00000024339,<br/> ENSMUSG00000044583, ENSMUSG00000025746,<br/> ENSMUSG00000030111, ENSMUSG00000042726,<br/> ENSMUSG00000049109, ENSMUSG00000026177</p> |   |   |  |
| GO:0051856 | adhesion to symbiont        | 0.00051139<br>6 | 6  | <p>ENSMUSG00000040253, ENSMUSG00000028270,<br/> ENSMUSG00000028269, ENSMUSG00000029298,<br/> ENSMUSG00000079362, ENSMUSG00000028268</p>                                                                                                                                                                                                                                                                                                                                                                                                                                                                                                                                                                                                                                                                                                                                                                                                                                           | 1 | 0 |  |
| GO:0002526 | acute inflammatory response | 0.00389412<br>6 | 11 | <p>ENSMUSG00000040026, ENSMUSG00000040017,<br/> ENSMUSG00000037440, ENSMUSG00000030017,</p>                                                                                                                                                                                                                                                                                                                                                                                                                                                                                                                                                                                                                                                                                                                                                                                                                                                                                       | 1 | 0 |  |

|            |                                    |          |     |                                                                                                                                                                                                                                                                                                                                                                                                                                                                                                                                                                                                                                                                                                                                                                                                                                                                                                                                                                             |   |    |                                                                                                                                                                                                                                                                                                                                                                                                                                                                                                                                                                                                                                                                                                                                                                                                                                                                                                                                                                               |
|------------|------------------------------------|----------|-----|-----------------------------------------------------------------------------------------------------------------------------------------------------------------------------------------------------------------------------------------------------------------------------------------------------------------------------------------------------------------------------------------------------------------------------------------------------------------------------------------------------------------------------------------------------------------------------------------------------------------------------------------------------------------------------------------------------------------------------------------------------------------------------------------------------------------------------------------------------------------------------------------------------------------------------------------------------------------------------|---|----|-------------------------------------------------------------------------------------------------------------------------------------------------------------------------------------------------------------------------------------------------------------------------------------------------------------------------------------------------------------------------------------------------------------------------------------------------------------------------------------------------------------------------------------------------------------------------------------------------------------------------------------------------------------------------------------------------------------------------------------------------------------------------------------------------------------------------------------------------------------------------------------------------------------------------------------------------------------------------------|
|            |                                    |          |     | ENSMUSG00000025746, ENSMUSG00000027398,<br>ENSMUSG00000029380, ENSMUSG00000074115,<br>ENSMUSG00000057465, ENSMUSG00000026981,<br>ENSMUSG00000015947                                                                                                                                                                                                                                                                                                                                                                                                                                                                                                                                                                                                                                                                                                                                                                                                                         |   |    |                                                                                                                                                                                                                                                                                                                                                                                                                                                                                                                                                                                                                                                                                                                                                                                                                                                                                                                                                                               |
| GO:0048583 | regulation of response to stimulus | 3.31E-09 | 134 | ENSMUSG00000036931, ENSMUSG00000027995,<br>ENSMUSG00000036887, ENSMUSG00000027699,<br>ENSMUSG00000049103, ENSMUSG00000061232,<br>ENSMUSG00000053977, ENSMUSG00000022831,<br>ENSMUSG0000000817, ENSMUSG00000022906,<br>ENSMUSG0000001123, ENSMUSG00000028071,<br>ENSMUSG00000040296, ENSMUSG00000020053,<br>ENSMUSG00000037321, ENSMUSG00000035365,<br>ENSMUSG00000031551, ENSMUSG00000053395,<br>ENSMUSG00000025473, ENSMUSG00000038037,<br>ENSMUSG00000045322, ENSMUSG00000027368,<br>ENSMUSG0000001444, ENSMUSG00000055994,<br>ENSMUSG00000030149, ENSMUSG00000000982,<br>ENSMUSG00000026656, ENSMUSG00000023913,<br>ENSMUSG00000030124, ENSMUSG00000028068,<br>ENSMUSG00000038418, ENSMUSG00000022876,<br>ENSMUSG00000042345, ENSMUSG00000074151,<br>ENSMUSG00000036905, ENSMUSG00000071005,<br>ENSMUSG00000046845, ENSMUSG00000029377,<br>ENSMUSG00000073406, ENSMUSG00000053063,<br>ENSMUSG00000030413, ENSMUSG00000062007,<br>ENSMUSG00000027398, ENSMUSG00000027639, | 1 | 95 | ENSMUSG00000009471, ENSMUSG00000033327,<br>ENSMUSG00000032547, ENSMUSG00000025889,<br>ENSMUSG00000062515, ENSMUSG00000046532,<br>ENSMUSG00000026715, ENSMUSG00000090877,<br>ENSMUSG00000039952, ENSMUSG00000037188,<br>ENSMUSG00000090639, ENSMUSG00000026983,<br>ENSMUSG00000061393, ENSMUSG00000071317,<br>ENSMUSG00000026874, ENSMUSG00000039004,<br>ENSMUSG00000033208, ENSMUSG00000059495,<br>ENSMUSG00000089865, ENSMUSG00000031760,<br>ENSMUSG00000029195, ENSMUSG00000043496,<br>ENSMUSG00000017697, ENSMUSG00000044037,<br>ENSMUSG00000036867, ENSMUSG00000040289,<br>ENSMUSG00000032076, ENSMUSG00000022878,<br>ENSMUSG00000025860, ENSMUSG00000042812,<br>ENSMUSG00000059201, ENSMUSG00000022868,<br>ENSMUSG00000031214, ENSMUSG00000027470,<br>ENSMUSG00000026984, ENSMUSG00000001494,<br>ENSMUSG00000059327, ENSMUSG00000052305,<br>ENSMUSG0000000049, ENSMUSG00000050164,<br>ENSMUSG00000032422, ENSMUSG00000032356,<br>ENSMUSG00000032083, ENSMUSG00000059481, |

|  |  |  |                                                                                                                                                                                                                                                                                                                                                                                                                                                                                                                                                                                                                                                                                                                                                                                                                                                                                                                                                                                                                                                                                                                                                            |  |  |                                                                                                                                                                                                                                                                                                                                                                                                                                                                                                                                                                                                                                                                                                                                                                                                                                                                                                                                                                                                                                                                                                                                      |
|--|--|--|------------------------------------------------------------------------------------------------------------------------------------------------------------------------------------------------------------------------------------------------------------------------------------------------------------------------------------------------------------------------------------------------------------------------------------------------------------------------------------------------------------------------------------------------------------------------------------------------------------------------------------------------------------------------------------------------------------------------------------------------------------------------------------------------------------------------------------------------------------------------------------------------------------------------------------------------------------------------------------------------------------------------------------------------------------------------------------------------------------------------------------------------------------|--|--|--------------------------------------------------------------------------------------------------------------------------------------------------------------------------------------------------------------------------------------------------------------------------------------------------------------------------------------------------------------------------------------------------------------------------------------------------------------------------------------------------------------------------------------------------------------------------------------------------------------------------------------------------------------------------------------------------------------------------------------------------------------------------------------------------------------------------------------------------------------------------------------------------------------------------------------------------------------------------------------------------------------------------------------------------------------------------------------------------------------------------------------|
|  |  |  | ENSMUSG00000034459, ENSMUSG00000029005,<br>ENSMUSG00000055170, ENSMUSG00000027843,<br>ENSMUSG00000035042, ENSMUSG00000035186,<br>ENSMUSG00000058715, ENSMUSG00000026475,<br>ENSMUSG00000004296, ENSMUSG00000000791,<br>ENSMUSG00000015947, ENSMUSG00000023078,<br>ENSMUSG00000034394, ENSMUSG00000079298,<br>ENSMUSG00000026358, ENSMUSG00000036986,<br>ENSMUSG00000039519, ENSMUSG00000024401,<br>ENSMUSG00000090231, ENSMUSG00000028971,<br>ENSMUSG00000026580, ENSMUSG00000025746,<br>ENSMUSG00000053113, ENSMUSG00000049109,<br>ENSMUSG00000025165, ENSMUSG00000058755,<br>ENSMUSG00000060802, ENSMUSG00000018899,<br>ENSMUSG00000016529, ENSMUSG00000028072,<br>ENSMUSG00000018930, ENSMUSG00000034652,<br>ENSMUSG00000025804, ENSMUSG00000051498,<br>ENSMUSG00000030895, ENSMUSG00000046718,<br>ENSMUSG00000000182, ENSMUSG00000034855,<br>ENSMUSG00000026770, ENSMUSG00000030921,<br>ENSMUSG00000033470, ENSMUSG00000044701,<br>ENSMUSG00000005696, ENSMUSG00000040751,<br>ENSMUSG00000022548, ENSMUSG00000030525,<br>ENSMUSG00000040552, ENSMUSG00000035373,<br>ENSMUSG00000021322, ENSMUSG00000024371,<br>ENSMUSG00000055172, ENSMUSG00000050241, |  |  | ENSMUSG00000031355, ENSMUSG00000054196,<br>ENSMUSG00000052374, ENSMUSG00000025265,<br>ENSMUSG00000031980, ENSMUSG00000040412,<br>ENSMUSG00000031380, ENSMUSG00000025810,<br>ENSMUSG00000029368, ENSMUSG00000001995,<br>ENSMUSG00000055980, ENSMUSG00000061780,<br>ENSMUSG00000046714, ENSMUSG00000031841,<br>ENSMUSG00000021319, ENSMUSG00000032554,<br>ENSMUSG00000024028, ENSMUSG00000041688,<br>ENSMUSG00000021055, ENSMUSG00000031996,<br>ENSMUSG00000020889, ENSMUSG00000020427,<br>ENSMUSG0000005705, ENSMUSG00000022996,<br>ENSMUSG00000031489, ENSMUSG00000001300,<br>ENSMUSG00000032216, ENSMUSG00000020623,<br>ENSMUSG00000032064, ENSMUSG00000063632,<br>ENSMUSG00000024386, ENSMUSG00000046834,<br>ENSMUSG00000073465, ENSMUSG00000038119,<br>ENSMUSG00000073424, ENSMUSG00000055653,<br>ENSMUSG00000019326, ENSMUSG00000046818,<br>ENSMUSG00000032570, ENSMUSG00000032911,<br>ENSMUSG00000024039, ENSMUSG00000032558,<br>ENSMUSG00000025386, ENSMUSG00000007815,<br>ENSMUSG00000040146, ENSMUSG00000025656,<br>ENSMUSG00000031144, ENSMUSG00000024653,<br>ENSMUSG00000058914, ENSMUSG00000020052,<br>ENSMUSG00000010047 |
|--|--|--|------------------------------------------------------------------------------------------------------------------------------------------------------------------------------------------------------------------------------------------------------------------------------------------------------------------------------------------------------------------------------------------------------------------------------------------------------------------------------------------------------------------------------------------------------------------------------------------------------------------------------------------------------------------------------------------------------------------------------------------------------------------------------------------------------------------------------------------------------------------------------------------------------------------------------------------------------------------------------------------------------------------------------------------------------------------------------------------------------------------------------------------------------------|--|--|--------------------------------------------------------------------------------------------------------------------------------------------------------------------------------------------------------------------------------------------------------------------------------------------------------------------------------------------------------------------------------------------------------------------------------------------------------------------------------------------------------------------------------------------------------------------------------------------------------------------------------------------------------------------------------------------------------------------------------------------------------------------------------------------------------------------------------------------------------------------------------------------------------------------------------------------------------------------------------------------------------------------------------------------------------------------------------------------------------------------------------------|

|            |                                 |                 |    |                                                                                                                                                                                                                                                                                                                                                                                                                                                                                                                                                                                                                                                                                                                                                                                                                                                                                        |   |    |                                                                                                                                                                                                                                                                                |
|------------|---------------------------------|-----------------|----|----------------------------------------------------------------------------------------------------------------------------------------------------------------------------------------------------------------------------------------------------------------------------------------------------------------------------------------------------------------------------------------------------------------------------------------------------------------------------------------------------------------------------------------------------------------------------------------------------------------------------------------------------------------------------------------------------------------------------------------------------------------------------------------------------------------------------------------------------------------------------------------|---|----|--------------------------------------------------------------------------------------------------------------------------------------------------------------------------------------------------------------------------------------------------------------------------------|
|            |                                 |                 |    | <p>ENSMUSG00000079620, ENSMUSG00000024397,<br/> ENSMUSG00000048806, ENSMUSG00000044583,<br/> ENSMUSG00000078817, ENSMUSG00000033952,<br/> ENSMUSG00000021451, ENSMUSG00000074148,<br/> ENSMUSG00000035673, ENSMUSG00000031444,<br/> ENSMUSG00000024696, ENSMUSG00000035385,<br/> ENSMUSG00000073411, ENSMUSG0000004952,<br/> ENSMUSG00000017146, ENSMUSG00000028874,<br/> ENSMUSG00000030365, ENSMUSG00000026011,<br/> ENSMUSG00000049608, ENSMUSG00000079227,<br/> ENSMUSG00000067212, ENSMUSG00000041324,<br/> ENSMUSG00000057135, ENSMUSG00000026104,<br/> ENSMUSG00000092005, ENSMUSG00000024349,<br/> ENSMUSG00000026573, ENSMUSG00000026981,<br/> ENSMUSG00000022901, ENSMUSG00000021886,<br/> ENSMUSG00000044827, ENSMUSG00000029371,<br/> ENSMUSG00000034116, ENSMUSG00000021765,<br/> ENSMUSG00000024339, ENSMUSG00000042726,<br/> ENSMUSG00000030111, ENSMUSG00000026177</p> |   |    |                                                                                                                                                                                                                                                                                |
| GO:0051223 | regulation of protein transport | 0.00013991<br>7 | 29 | <p>ENSMUSG00000030142, ENSMUSG00000055170,<br/> ENSMUSG00000027995, ENSMUSG00000045322,<br/> ENSMUSG00000055994, ENSMUSG00000022548,<br/> ENSMUSG00000071005, ENSMUSG00000027699,<br/> ENSMUSG00000024349, ENSMUSG00000051439,<br/> ENSMUSG00000074115, ENSMUSG00000016529,<br/> ENSMUSG00000037313, ENSMUSG00000000982,</p>                                                                                                                                                                                                                                                                                                                                                                                                                                                                                                                                                           | 1 | 12 | <p>ENSMUSG00000024990, ENSMUSG00000034584,<br/> ENSMUSG00000031495, ENSMUSG00000059201,<br/> ENSMUSG00000032083, ENSMUSG00000062778,<br/> ENSMUSG00000059327, ENSMUSG00000026874,<br/> ENSMUSG00000022878, ENSMUSG00000032076,<br/> ENSMUSG00000010047, ENSMUSG00000024526</p> |



|            |                           |   |    |                                                                                                                                                                                                                                                                                                                                                      |             |    |                                                                                                                                                                                                                                                                                                                                                                                                                                                                                                                                                                                                                                                                                                                                                                                                                                          |
|------------|---------------------------|---|----|------------------------------------------------------------------------------------------------------------------------------------------------------------------------------------------------------------------------------------------------------------------------------------------------------------------------------------------------------|-------------|----|------------------------------------------------------------------------------------------------------------------------------------------------------------------------------------------------------------------------------------------------------------------------------------------------------------------------------------------------------------------------------------------------------------------------------------------------------------------------------------------------------------------------------------------------------------------------------------------------------------------------------------------------------------------------------------------------------------------------------------------------------------------------------------------------------------------------------------------|
|            |                           |   |    | <p>ENSMUSG00000032691, ENSMUSG00000019942,<br/> ENSMUSG00000029075, ENSMUSG00000030793,<br/> ENSMUSG00000028874, ENSMUSG00000029915,<br/> ENSMUSG00000024401, ENSMUSG00000040296,<br/> ENSMUSG00000020053, ENSMUSG00000044583,<br/> ENSMUSG00000025746, ENSMUSG00000027398,<br/> ENSMUSG00000044811, ENSMUSG00000079227,<br/> ENSMUSG00000078817</p> |             |    |                                                                                                                                                                                                                                                                                                                                                                                                                                                                                                                                                                                                                                                                                                                                                                                                                                          |
| GO:0043436 | oxoacid metabolic process | 1 | 13 | <p>ENSMUSG00000030268, ENSMUSG00000038963,<br/> ENSMUSG00000003484, ENSMUSG00000037440,<br/> ENSMUSG00000017146, ENSMUSG00000039519,<br/> ENSMUSG00000050370, ENSMUSG00000021266,<br/> ENSMUSG00000018907, ENSMUSG00000027199,<br/> ENSMUSG00000022126, ENSMUSG00000031551,<br/> ENSMUSG00000020010</p>                                              | 0.000136703 | 55 | <p>ENSMUSG00000037686, ENSMUSG00000032263,<br/> ENSMUSG00000033327, ENSMUSG00000032262,<br/> ENSMUSG00000025889, ENSMUSG00000062515,<br/> ENSMUSG00000020182, ENSMUSG00000046402,<br/> ENSMUSG0000002588, ENSMUSG00000002010,<br/> ENSMUSG0000004038, ENSMUSG00000032310,<br/> ENSMUSG00000032418, ENSMUSG00000027513,<br/> ENSMUSG00000032807, ENSMUSG00000032279,<br/> ENSMUSG00000067653, ENSMUSG00000019278,<br/> ENSMUSG00000074183, ENSMUSG00000037071,<br/> ENSMUSG00000029361, ENSMUSG00000032348,<br/> ENSMUSG00000025202, ENSMUSG00000025153,<br/> ENSMUSG00000057880, ENSMUSG00000073424,<br/> ENSMUSG00000002769, ENSMUSG00000022878,<br/> ENSMUSG00000078597, ENSMUSG00000030399,<br/> ENSMUSG00000032349, ENSMUSG00000059201,<br/> ENSMUSG00000066072, ENSMUSG00000021622,<br/> ENSMUSG0000004885, ENSMUSG00000024039,</p> |

|            |                                                                                                                                                     |                 |    |                                                                                                                                                                                                                                                                                                                                                                                            |   |   |                                                                                                                                                                                                                                                                                                                                                                                           |
|------------|-----------------------------------------------------------------------------------------------------------------------------------------------------|-----------------|----|--------------------------------------------------------------------------------------------------------------------------------------------------------------------------------------------------------------------------------------------------------------------------------------------------------------------------------------------------------------------------------------------|---|---|-------------------------------------------------------------------------------------------------------------------------------------------------------------------------------------------------------------------------------------------------------------------------------------------------------------------------------------------------------------------------------------------|
|            |                                                                                                                                                     |                 |    |                                                                                                                                                                                                                                                                                                                                                                                            |   |   | ENSMUSG00000030972, ENSMUSG00000058135, ENSMUSG0000000168, ENSMUSG00000031299, ENSMUSG00000025991, ENSMUSG00000032315, ENSMUSG00000027820, ENSMUSG00000090150, ENSMUSG00000022040, ENSMUSG00000075217, ENSMUSG00000028167, ENSMUSG00000031425, ENSMUSG00000024892, ENSMUSG00000029695, ENSMUSG00000041220, ENSMUSG00000035202, ENSMUSG00000050195, ENSMUSG00000020532, ENSMUSG00000027380 |
| GO:0002687 | positive regulation of leukocyte migration                                                                                                          | 1.23E-09        | 19 | ENSMUSG00000027995, ENSMUSG00000035042, ENSMUSG00000071005, ENSMUSG00000040552, ENSMUSG00000026573, ENSMUSG00000035373, ENSMUSG00000049103, ENSMUSG00000035385, ENSMUSG00000000982, ENSMUSG00000020310, ENSMUSG00000023913, ENSMUSG00000023078, ENSMUSG00000026582, ENSMUSG00000018930, ENSMUSG00000024397, ENSMUSG00000026580, ENSMUSG00000041347, ENSMUSG00000034855, ENSMUSG00000025473 | 1 | 2 | ENSMUSG00000031380, ENSMUSG00000019326                                                                                                                                                                                                                                                                                                                                                    |
| GO:0052257 | pathogen-associated molecular pattern dependent induction by organism of innate immune response of other organism involved in symbiotic interaction | 0.00351362<br>7 | 5  | ENSMUSG00000027995, ENSMUSG00000045322, ENSMUSG00000044583, ENSMUSG00000051498, ENSMUSG00000055994                                                                                                                                                                                                                                                                                         | 1 | 0 |                                                                                                                                                                                                                                                                                                                                                                                           |

|            |                                                     |                 |     |                                                                                                                                                                                                                                                                                                                                                                                                                                                                                                                                                                                                                                                                |   |     |                                                                                                                                                                                                         |
|------------|-----------------------------------------------------|-----------------|-----|----------------------------------------------------------------------------------------------------------------------------------------------------------------------------------------------------------------------------------------------------------------------------------------------------------------------------------------------------------------------------------------------------------------------------------------------------------------------------------------------------------------------------------------------------------------------------------------------------------------------------------------------------------------|---|-----|---------------------------------------------------------------------------------------------------------------------------------------------------------------------------------------------------------|
| GO:0001819 | positive regulation of cytokine production          | 3.38E-11        | 32  | ENSMUSG00000027995, ENSMUSG00000029377, ENSMUSG00000049103, ENSMUSG00000051439, ENSMUSG00000032691, ENSMUSG00000018930, ENSMUSG00000040296, ENSMUSG00000027398, ENSMUSG00000079227, ENSMUSG00000031551, ENSMUSG00000025473, ENSMUSG00000055170, ENSMUSG00000045322, ENSMUSG00000055994, ENSMUSG00000035042, ENSMUSG00000058715, ENSMUSG00000030149, ENSMUSG00000071552, ENSMUSG00000026573, ENSMUSG00000040552, ENSMUSG00000004296, ENSMUSG00000000982, ENSMUSG00000053175, ENSMUSG00000000791, ENSMUSG00000025498, ENSMUSG00000050241, ENSMUSG00000041515, ENSMUSG00000030793, ENSMUSG00000024401, ENSMUSG00000025746, ENSMUSG00000044583, ENSMUSG00000026177 | 1 | 4   | ENSMUSG00000031380, ENSMUSG00000026874, ENSMUSG00000022878, ENSMUSG00000062778                                                                                                                          |
| GO:0002715 | regulation of natural killer cell mediated immunity | 0.00042102<br>9 | 9   | ENSMUSG00000005696, ENSMUSG00000050241, ENSMUSG00000030124, ENSMUSG00000079298, ENSMUSG00000030149, ENSMUSG00000024339, ENSMUSG00000073406, ENSMUSG00000037321, ENSMUSG00000004296                                                                                                                                                                                                                                                                                                                                                                                                                                                                             | 1 | 0   |                                                                                                                                                                                                         |
| GO:0048519 | negative regulation of biological process           | 3.04E-06        | 162 | ENSMUSG00000017716, ENSMUSG00000033538, ENSMUSG00000036931, ENSMUSG00000027995, ENSMUSG00000066861, ENSMUSG00000049103, ENSMUSG00000020185, ENSMUSG00000075404, ENSMUSG00000019942, ENSMUSG00000021190,                                                                                                                                                                                                                                                                                                                                                                                                                                                        | 1 | 113 | ENSMUSG00000020123, ENSMUSG00000032547, ENSMUSG00000025889, ENSMUSG00000062515, ENSMUSG00000046532, ENSMUSG00000066357, ENSMUSG00000026715, ENSMUSG00000090877, ENSMUSG00000039952, ENSMUSG00000044820, |

|  |  |                                                                                                                                                                                                                                                                                                                                                                                                                                                                                                                                                                                                                                                                                                                                                                                                                                                                                                                                                                                                                                                                                                                                                          |  |                                                                                                                                                                                                                                                                                                                                                                                                                                                                                                                                                                                                                                                                                                                                                                                                                                                                                                                                                                                                                                                                                                                                                            |
|--|--|----------------------------------------------------------------------------------------------------------------------------------------------------------------------------------------------------------------------------------------------------------------------------------------------------------------------------------------------------------------------------------------------------------------------------------------------------------------------------------------------------------------------------------------------------------------------------------------------------------------------------------------------------------------------------------------------------------------------------------------------------------------------------------------------------------------------------------------------------------------------------------------------------------------------------------------------------------------------------------------------------------------------------------------------------------------------------------------------------------------------------------------------------------|--|------------------------------------------------------------------------------------------------------------------------------------------------------------------------------------------------------------------------------------------------------------------------------------------------------------------------------------------------------------------------------------------------------------------------------------------------------------------------------------------------------------------------------------------------------------------------------------------------------------------------------------------------------------------------------------------------------------------------------------------------------------------------------------------------------------------------------------------------------------------------------------------------------------------------------------------------------------------------------------------------------------------------------------------------------------------------------------------------------------------------------------------------------------|
|  |  | ENSMUSG0000000817, ENSMUSG00000036896,<br>ENSMUSG00000033644, ENSMUSG00000022504,<br>ENSMUSG00000020053, ENSMUSG00000037321,<br>ENSMUSG00000035365, ENSMUSG00000031551,<br>ENSMUSG00000036912, ENSMUSG00000042489,<br>ENSMUSG00000025473, ENSMUSG00000038037,<br>ENSMUSG00000045322, ENSMUSG00000025492,<br>ENSMUSG00000027368, ENSMUSG00000002992,<br>ENSMUSG00000055994, ENSMUSG00000063268,<br>ENSMUSG00000041431, ENSMUSG00000037313,<br>ENSMUSG00000000982, ENSMUSG00000029304,<br>ENSMUSG00000053175, ENSMUSG00000002307,<br>ENSMUSG00000078763, ENSMUSG00000026656,<br>ENSMUSG00000020897, ENSMUSG00000029075,<br>ENSMUSG00000001131, ENSMUSG00000030124,<br>ENSMUSG00000028068, ENSMUSG00000038418,<br>ENSMUSG00000022876, ENSMUSG00000042345,<br>ENSMUSG00000024079, ENSMUSG00000074151,<br>ENSMUSG00000040613, ENSMUSG00000040528,<br>ENSMUSG0000003665, ENSMUSG00000071005,<br>ENSMUSG00000046845, ENSMUSG00000029377,<br>ENSMUSG00000073406, ENSMUSG00000072620,<br>ENSMUSG00000032691, ENSMUSG00000045328,<br>ENSMUSG00000037725, ENSMUSG00000027398,<br>ENSMUSG00000034459, ENSMUSG00000016496,<br>ENSMUSG00000029005, ENSMUSG00000055170, |  | ENSMUSG00000002010, ENSMUSG00000026983,<br>ENSMUSG00000013418, ENSMUSG00000026874,<br>ENSMUSG00000033208, ENSMUSG00000026668,<br>ENSMUSG00000059495, ENSMUSG00000079428,<br>ENSMUSG00000031760, ENSMUSG00000010051,<br>ENSMUSG00000037071, ENSMUSG00000017697,<br>ENSMUSG00000036867, ENSMUSG00000046240,<br>ENSMUSG00000037010, ENSMUSG00000052187,<br>ENSMUSG00000040289, ENSMUSG00000051234,<br>ENSMUSG00000008035, ENSMUSG00000040055,<br>ENSMUSG00000022878, ENSMUSG00000024027,<br>ENSMUSG00000025860, ENSMUSG00000042812,<br>ENSMUSG00000062713, ENSMUSG00000064179,<br>ENSMUSG00000059201, ENSMUSG00000022868,<br>ENSMUSG00000027077, ENSMUSG00000026984,<br>ENSMUSG00000035486, ENSMUSG00000041616,<br>ENSMUSG00000001494, ENSMUSG00000000049,<br>ENSMUSG00000052217, ENSMUSG00000024990,<br>ENSMUSG00000032422, ENSMUSG00000032083,<br>ENSMUSG00000038775, ENSMUSG00000059481,<br>ENSMUSG00000031355, ENSMUSG00000042903,<br>ENSMUSG00000046814, ENSMUSG00000054196,<br>ENSMUSG00000031980, ENSMUSG00000030730,<br>ENSMUSG00000025810, ENSMUSG00000049556,<br>ENSMUSG00000029368, ENSMUSG00000032366,<br>ENSMUSG00000055980, ENSMUSG00000040147, |
|--|--|----------------------------------------------------------------------------------------------------------------------------------------------------------------------------------------------------------------------------------------------------------------------------------------------------------------------------------------------------------------------------------------------------------------------------------------------------------------------------------------------------------------------------------------------------------------------------------------------------------------------------------------------------------------------------------------------------------------------------------------------------------------------------------------------------------------------------------------------------------------------------------------------------------------------------------------------------------------------------------------------------------------------------------------------------------------------------------------------------------------------------------------------------------|--|------------------------------------------------------------------------------------------------------------------------------------------------------------------------------------------------------------------------------------------------------------------------------------------------------------------------------------------------------------------------------------------------------------------------------------------------------------------------------------------------------------------------------------------------------------------------------------------------------------------------------------------------------------------------------------------------------------------------------------------------------------------------------------------------------------------------------------------------------------------------------------------------------------------------------------------------------------------------------------------------------------------------------------------------------------------------------------------------------------------------------------------------------------|

|  |  |  |                                                                                                                                                                                                                                                                                                                                                                                                                                                                                                                                                                                                                                                                                                                                                                                                                                                                                                                                                                                                                                                                                                                                                            |  |  |                                                                                                                                                                                                                                                                                                                                                                                                                                                                                                                                                                                                                                                                                                                                                                                                                                                                                                                                                                                                                                                                                                                                      |
|--|--|--|------------------------------------------------------------------------------------------------------------------------------------------------------------------------------------------------------------------------------------------------------------------------------------------------------------------------------------------------------------------------------------------------------------------------------------------------------------------------------------------------------------------------------------------------------------------------------------------------------------------------------------------------------------------------------------------------------------------------------------------------------------------------------------------------------------------------------------------------------------------------------------------------------------------------------------------------------------------------------------------------------------------------------------------------------------------------------------------------------------------------------------------------------------|--|--|--------------------------------------------------------------------------------------------------------------------------------------------------------------------------------------------------------------------------------------------------------------------------------------------------------------------------------------------------------------------------------------------------------------------------------------------------------------------------------------------------------------------------------------------------------------------------------------------------------------------------------------------------------------------------------------------------------------------------------------------------------------------------------------------------------------------------------------------------------------------------------------------------------------------------------------------------------------------------------------------------------------------------------------------------------------------------------------------------------------------------------------|
|  |  |  | ENSMUSG00000068227, ENSMUSG00000027843,<br>ENSMUSG00000022838, ENSMUSG00000035042,<br>ENSMUSG00000034329, ENSMUSG00000035186,<br>ENSMUSG00000058715, ENSMUSG00000030077,<br>ENSMUSG00000090125, ENSMUSG00000026475,<br>ENSMUSG00000004296, ENSMUSG00000018486,<br>ENSMUSG00000041515, ENSMUSG00000037440,<br>ENSMUSG00000020415, ENSMUSG00000034394,<br>ENSMUSG00000079298, ENSMUSG00000026358,<br>ENSMUSG00000039519, ENSMUSG00000036986,<br>ENSMUSG00000024401, ENSMUSG00000074622,<br>ENSMUSG00000025746, ENSMUSG00000072082,<br>ENSMUSG00000053113, ENSMUSG00000026628,<br>ENSMUSG00000058755, ENSMUSG00000073412,<br>ENSMUSG00000018986, ENSMUSG00000018899,<br>ENSMUSG00000016529, ENSMUSG00000017724,<br>ENSMUSG00000000392, ENSMUSG00000068744,<br>ENSMUSG00000028072, ENSMUSG00000018930,<br>ENSMUSG00000026222, ENSMUSG00000034652,<br>ENSMUSG00000025804, ENSMUSG00000000182,<br>ENSMUSG00000034855, ENSMUSG00000091875,<br>ENSMUSG00000079019, ENSMUSG00000026770,<br>ENSMUSG00000030921, ENSMUSG00000028718,<br>ENSMUSG00000035455, ENSMUSG00000022548,<br>ENSMUSG00000070691, ENSMUSG00000030525,<br>ENSMUSG00000040627, ENSMUSG00000021322, |  |  | ENSMUSG00000046714, ENSMUSG00000031841,<br>ENSMUSG00000032010, ENSMUSG00000021319,<br>ENSMUSG00000024028, ENSMUSG00000041688,<br>ENSMUSG00000061311, ENSMUSG00000030607,<br>ENSMUSG00000021055, ENSMUSG00000023336,<br>ENSMUSG00000020889, ENSMUSG00000020427,<br>ENSMUSG00000031431, ENSMUSG00000022996,<br>ENSMUSG00000031489, ENSMUSG00000055561,<br>ENSMUSG00000019278, ENSMUSG00000032216,<br>ENSMUSG00000032060, ENSMUSG00000025862,<br>ENSMUSG00000063632, ENSMUSG00000032064,<br>ENSMUSG00000024386, ENSMUSG00000029019,<br>ENSMUSG00000032194, ENSMUSG00000023092,<br>ENSMUSG00000029361, ENSMUSG00000055609,<br>ENSMUSG00000073465, ENSMUSG00000073424,<br>ENSMUSG00000024526, ENSMUSG00000026532,<br>ENSMUSG00000055653, ENSMUSG00000050071,<br>ENSMUSG00000046818, ENSMUSG0000005373,<br>ENSMUSG00000089996, ENSMUSG00000032911,<br>ENSMUSG00000024039, ENSMUSG00000032558,<br>ENSMUSG00000001134, ENSMUSG00000007815,<br>ENSMUSG00000058669, ENSMUSG00000032081,<br>ENSMUSG00000024653, ENSMUSG00000058914,<br>ENSMUSG00000020052, ENSMUSG00000028036,<br>ENSMUSG00000059668, ENSMUSG00000022206,<br>ENSMUSG00000010047 |
|--|--|--|------------------------------------------------------------------------------------------------------------------------------------------------------------------------------------------------------------------------------------------------------------------------------------------------------------------------------------------------------------------------------------------------------------------------------------------------------------------------------------------------------------------------------------------------------------------------------------------------------------------------------------------------------------------------------------------------------------------------------------------------------------------------------------------------------------------------------------------------------------------------------------------------------------------------------------------------------------------------------------------------------------------------------------------------------------------------------------------------------------------------------------------------------------|--|--|--------------------------------------------------------------------------------------------------------------------------------------------------------------------------------------------------------------------------------------------------------------------------------------------------------------------------------------------------------------------------------------------------------------------------------------------------------------------------------------------------------------------------------------------------------------------------------------------------------------------------------------------------------------------------------------------------------------------------------------------------------------------------------------------------------------------------------------------------------------------------------------------------------------------------------------------------------------------------------------------------------------------------------------------------------------------------------------------------------------------------------------|

|            |                                                     |            |   |                                                                                                                                                                                                                                                                                                                                                                                                                                                                                                                                                                                                                                                                                                                                                                                                                                                                                                                                                                                                                                                                    |   |   |  |
|------------|-----------------------------------------------------|------------|---|--------------------------------------------------------------------------------------------------------------------------------------------------------------------------------------------------------------------------------------------------------------------------------------------------------------------------------------------------------------------------------------------------------------------------------------------------------------------------------------------------------------------------------------------------------------------------------------------------------------------------------------------------------------------------------------------------------------------------------------------------------------------------------------------------------------------------------------------------------------------------------------------------------------------------------------------------------------------------------------------------------------------------------------------------------------------|---|---|--|
|            |                                                     |            |   | ENSMUSG00000038357, ENSMUSG00000050241,<br>ENSMUSG0000003283, ENSMUSG00000078236,<br>ENSMUSG00000079620, ENSMUSG00000030867,<br>ENSMUSG00000016498, ENSMUSG00000024397,<br>ENSMUSG00000048806, ENSMUSG00000078817,<br>ENSMUSG00000033952, ENSMUSG00000021451,<br>ENSMUSG00000035673, ENSMUSG00000034730,<br>ENSMUSG00000026605, ENSMUSG00000024696,<br>ENSMUSG00000029378, ENSMUSG00000035385,<br>ENSMUSG00000074651, ENSMUSG00000017146,<br>ENSMUSG00000004952, ENSMUSG00000029915,<br>ENSMUSG00000073489, ENSMUSG00000030365,<br>ENSMUSG00000026011, ENSMUSG00000090272,<br>ENSMUSG00000079227, ENSMUSG00000037628,<br>ENSMUSG00000049608, ENSMUSG00000041324,<br>ENSMUSG00000024014, ENSMUSG00000026104,<br>ENSMUSG00000071552, ENSMUSG00000026573,<br>ENSMUSG00000026981, ENSMUSG00000022901,<br>ENSMUSG00000025001, ENSMUSG00000045471,<br>ENSMUSG00000032661, ENSMUSG00000039981,<br>ENSMUSG00000040829, ENSMUSG00000021765,<br>ENSMUSG00000024339, ENSMUSG00000041347,<br>ENSMUSG00000042726, ENSMUSG00000045763,<br>ENSMUSG00000030111, ENSMUSG00000026177 |   |   |  |
| GO:0051988 | regulation of attachment of spindle microtubules to | 0.00907611 | 5 | ENSMUSG00000045328, ENSMUSG00000041431,<br>ENSMUSG00000002055, ENSMUSG00000023015,                                                                                                                                                                                                                                                                                                                                                                                                                                                                                                                                                                                                                                                                                                                                                                                                                                                                                                                                                                                 | 1 | 0 |  |

|            |                                                                                              |                 |    |                                                                                                                                                                                                                                                                                         |   |   |                                        |
|------------|----------------------------------------------------------------------------------------------|-----------------|----|-----------------------------------------------------------------------------------------------------------------------------------------------------------------------------------------------------------------------------------------------------------------------------------------|---|---|----------------------------------------|
|            | kinetochore                                                                                  |                 |    | ENSMUSG00000027699                                                                                                                                                                                                                                                                      |   |   |                                        |
| GO:0051817 | modification of morphology or physiology of other organism involved in symbiotic interaction | 0.00514216<br>7 | 10 | ENSMUSG00000027995, ENSMUSG00000045322, ENSMUSG00000018930, ENSMUSG00000035042, ENSMUSG00000055994, ENSMUSG00000044583, ENSMUSG00000051498, ENSMUSG00000038357, ENSMUSG00000000982, ENSMUSG00000079227                                                                                  | 1 | 2 | ENSMUSG00000029368, ENSMUSG00000010047 |
| GO:0042990 | regulation of transcription factor import into nucleus                                       | 0.00482277<br>9 | 11 | ENSMUSG00000027995, ENSMUSG00000045322, ENSMUSG00000071005, ENSMUSG00000024401, ENSMUSG00000024349, ENSMUSG00000040296, ENSMUSG00000044583, ENSMUSG00000027398, ENSMUSG00000037313, ENSMUSG00000078817, ENSMUSG00000032691                                                              | 1 | 0 |                                        |
| GO:0052556 | positive regulation by symbiont of host immune response                                      | 0.00351362<br>7 | 5  | ENSMUSG00000027995, ENSMUSG00000045322, ENSMUSG00000044583, ENSMUSG00000051498, ENSMUSG00000055994                                                                                                                                                                                      | 1 | 0 |                                        |
| GO:0044146 | negative regulation of growth of symbiont involved in interaction with host                  | 0.00049450<br>7 | 8  | ENSMUSG00000055170, ENSMUSG00000027995, ENSMUSG00000041515, ENSMUSG00000055994, ENSMUSG00000024401, ENSMUSG00000038357, ENSMUSG00000016529, ENSMUSG0000004296                                                                                                                           | 1 | 0 |                                        |
| GO:0019724 | B cell mediated immunity                                                                     | 4.11E-06        | 16 | ENSMUSG00000036905, ENSMUSG00000036887, ENSMUSG00000055994, ENSMUSG00000092005, ENSMUSG00000039748, ENSMUSG00000058715, ENSMUSG00000026573, ENSMUSG00000040627, ENSMUSG00000024371, ENSMUSG00000076612, ENSMUSG00000055172, ENSMUSG00000053175, ENSMUSG00000015947, ENSMUSG00000026656, | 1 | 0 |                                        |

|            |                                             |                 |    |                                                                                                                                                                                                                                                                                                                                                                                                                                                                            |          |    |                                                                                                                                                                                                                                                                                                                                                                         |
|------------|---------------------------------------------|-----------------|----|----------------------------------------------------------------------------------------------------------------------------------------------------------------------------------------------------------------------------------------------------------------------------------------------------------------------------------------------------------------------------------------------------------------------------------------------------------------------------|----------|----|-------------------------------------------------------------------------------------------------------------------------------------------------------------------------------------------------------------------------------------------------------------------------------------------------------------------------------------------------------------------------|
|            |                                             |                 |    | ENSMUSG00000025498, ENSMUSG00000058818                                                                                                                                                                                                                                                                                                                                                                                                                                     |          |    |                                                                                                                                                                                                                                                                                                                                                                         |
| GO:0050867 | positive regulation of cell activation      | 0.00110783<br>8 | 23 | ENSMUSG00000055170, ENSMUSG00000001444, ENSMUSG00000035042, ENSMUSG00000055994, ENSMUSG00000058715, ENSMUSG00000026573, ENSMUSG00000049103, ENSMUSG00000035385, ENSMUSG00000004296, ENSMUSG00000000791, ENSMUSG00000022901, ENSMUSG00000029075, ENSMUSG00000037440, ENSMUSG00000075122, ENSMUSG00000028874, ENSMUSG00000016498, ENSMUSG00000024397, ENSMUSG00000026580, ENSMUSG00000020053, ENSMUSG00000025746, ENSMUSG00000027398, ENSMUSG00000026770, ENSMUSG00000025473 | 1        | 3  | ENSMUSG00000059201, ENSMUSG00000026532, ENSMUSG00000017697                                                                                                                                                                                                                                                                                                              |
| GO:2000403 | positive regulation of lymphocyte migration | 1.03E-05        | 8  | ENSMUSG00000023078, ENSMUSG00000018930, ENSMUSG00000035042, ENSMUSG00000024397, ENSMUSG00000026573, ENSMUSG00000035373, ENSMUSG00000049103, ENSMUSG00000000982                                                                                                                                                                                                                                                                                                             | 1        | 0  |                                                                                                                                                                                                                                                                                                                                                                         |
| GO:0061061 | muscle structure development                | 1               | 5  | ENSMUSG00000022587, ENSMUSG00000020053, ENSMUSG00000058773, ENSMUSG00000034394, ENSMUSG00000006642                                                                                                                                                                                                                                                                                                                                                                         | 4.04E-05 | 36 | ENSMUSG00000009471, ENSMUSG00000021506, ENSMUSG00000032366, ENSMUSG00000035606, ENSMUSG00000052911, ENSMUSG00000031274, ENSMUSG00000046714, ENSMUSG00000030672, ENSMUSG00000032010, ENSMUSG00000021909, ENSMUSG00000031972, ENSMUSG00000022996, ENSMUSG00000032085, ENSMUSG00000032060, ENSMUSG00000026459, ENSMUSG00000036867, ENSMUSG00000049641, ENSMUSG00000007877, |



|            |                                                     |                 |    |                                                                                                                                                                                                                                                                                                                                                                                                                       |   |   |                                                                                                                                                                                                                                                                                                                                                                                                |
|------------|-----------------------------------------------------|-----------------|----|-----------------------------------------------------------------------------------------------------------------------------------------------------------------------------------------------------------------------------------------------------------------------------------------------------------------------------------------------------------------------------------------------------------------------|---|---|------------------------------------------------------------------------------------------------------------------------------------------------------------------------------------------------------------------------------------------------------------------------------------------------------------------------------------------------------------------------------------------------|
|            |                                                     |                 |    |                                                                                                                                                                                                                                                                                                                                                                                                                       |   |   | ENSMUSG00000040289, ENSMUSG00000038119,<br>ENSMUSG00000040752, ENSMUSG00000042812,<br>ENSMUSG00000035458, ENSMUSG00000027470,<br>ENSMUSG00000027077, ENSMUSG00000032340,<br>ENSMUSG00000007815, ENSMUSG00000091898,<br>ENSMUSG00000053093, ENSMUSG00000045103,<br>ENSMUSG00000059741, ENSMUSG00000059481,<br>ENSMUSG00000042903, ENSMUSG00000006235,<br>ENSMUSG00000026418, ENSMUSG00000031980 |
| GO:0051702 | interaction with symbiont                           | 0.00183310<br>7 | 10 | ENSMUSG00000028269, ENSMUSG00000018930,<br>ENSMUSG00000079362, ENSMUSG00000035042,<br>ENSMUSG00000028268, ENSMUSG00000040253,<br>ENSMUSG00000028270, ENSMUSG00000029298,<br>ENSMUSG00000038357, ENSMUSG00000000982                                                                                                                                                                                                    | 1 | 0 |                                                                                                                                                                                                                                                                                                                                                                                                |
| GO:0002449 | lymphocyte mediated immunity                        | 3.06E-07        | 19 | ENSMUSG00000036905, ENSMUSG00000036887,<br>ENSMUSG00000055994, ENSMUSG00000092005,<br>ENSMUSG00000039748, ENSMUSG00000058715,<br>ENSMUSG00000026573, ENSMUSG00000040627,<br>ENSMUSG00000024371, ENSMUSG00000015437,<br>ENSMUSG00000076612, ENSMUSG00000053977,<br>ENSMUSG00000055172, ENSMUSG00000053175,<br>ENSMUSG00000015947, ENSMUSG00000026656,<br>ENSMUSG00000025498, ENSMUSG00000058818,<br>ENSMUSG00000026177 | 1 | 0 |                                                                                                                                                                                                                                                                                                                                                                                                |
| GO:0052306 | modulation by organism of innate immune response in | 0.00351362<br>7 | 5  | ENSMUSG00000027995, ENSMUSG00000045322,<br>ENSMUSG00000044583, ENSMUSG00000051498,                                                                                                                                                                                                                                                                                                                                    | 1 | 0 |                                                                                                                                                                                                                                                                                                                                                                                                |

|            |                                                  |          |    |                                                                                                                                                                                                                                                                                                                                                                                                                                                                                                                                                                                                                                                                                                                                                                                                                                                                                            |             |    |                                                                                                                                            |
|------------|--------------------------------------------------|----------|----|--------------------------------------------------------------------------------------------------------------------------------------------------------------------------------------------------------------------------------------------------------------------------------------------------------------------------------------------------------------------------------------------------------------------------------------------------------------------------------------------------------------------------------------------------------------------------------------------------------------------------------------------------------------------------------------------------------------------------------------------------------------------------------------------------------------------------------------------------------------------------------------------|-------------|----|--------------------------------------------------------------------------------------------------------------------------------------------|
|            | other organism involved in symbiotic interaction |          |    | ENSMUSG00000055994                                                                                                                                                                                                                                                                                                                                                                                                                                                                                                                                                                                                                                                                                                                                                                                                                                                                         |             |    |                                                                                                                                            |
| GO:0050778 | positive regulation of immune response           | 2.13E-16 | 43 | ENSMUSG00000060802, ENSMUSG00000036905, ENSMUSG00000074148, ENSMUSG00000027995, ENSMUSG00000036887, ENSMUSG00000029377, ENSMUSG00000049103, ENSMUSG00000061232, ENSMUSG00000073411, ENSMUSG00000030413, ENSMUSG00000030365, ENSMUSG00000026011, ENSMUSG00000051498, ENSMUSG00000030895, ENSMUSG00000037321, ENSMUSG00000031551, ENSMUSG00000025473, ENSMUSG00000067212, ENSMUSG00000005696, ENSMUSG00000045322, ENSMUSG00000027843, ENSMUSG00000092005, ENSMUSG00000040751, ENSMUSG00000055994, ENSMUSG00000058715, ENSMUSG00000024349, ENSMUSG00000030149, ENSMUSG00000040552, ENSMUSG00000026573, ENSMUSG00000024371, ENSMUSG00000004296, ENSMUSG00000000791, ENSMUSG00000055172, ENSMUSG00000015947, ENSMUSG00000022901, ENSMUSG00000050241, ENSMUSG00000030124, ENSMUSG00000024401, ENSMUSG00000090231, ENSMUSG00000024339, ENSMUSG00000044583, ENSMUSG00000049109, ENSMUSG00000026177 | 1           | 7  | ENSMUSG00000090877, ENSMUSG00000046834, ENSMUSG00000061780, ENSMUSG00000043496, ENSMUSG00000026874, ENSMUSG00000032076, ENSMUSG00000017697 |
| GO:0048878 | chemical homeostasis                             | 1        | 36 | ENSMUSG00000026822, ENSMUSG00000058427, ENSMUSG00000029379, ENSMUSG00000031762,                                                                                                                                                                                                                                                                                                                                                                                                                                                                                                                                                                                                                                                                                                                                                                                                            | 0.008216819 | 54 | ENSMUSG00000020123, ENSMUSG00000030302, ENSMUSG00000030730, ENSMUSG00000031757,                                                            |

|            |                    |          |     |                                                                                                                                                                                                                                                                                                                                                                                                                                                                                                                                                                                                                                                                                                                                                 |   |    |                                                                                                                                                                                                                                                                                                                                                                                                                                                                                                                                                                                                                                                                                                                                                                                                                                                                                                                                                                                                                                                                                                                                                                     |
|------------|--------------------|----------|-----|-------------------------------------------------------------------------------------------------------------------------------------------------------------------------------------------------------------------------------------------------------------------------------------------------------------------------------------------------------------------------------------------------------------------------------------------------------------------------------------------------------------------------------------------------------------------------------------------------------------------------------------------------------------------------------------------------------------------------------------------------|---|----|---------------------------------------------------------------------------------------------------------------------------------------------------------------------------------------------------------------------------------------------------------------------------------------------------------------------------------------------------------------------------------------------------------------------------------------------------------------------------------------------------------------------------------------------------------------------------------------------------------------------------------------------------------------------------------------------------------------------------------------------------------------------------------------------------------------------------------------------------------------------------------------------------------------------------------------------------------------------------------------------------------------------------------------------------------------------------------------------------------------------------------------------------------------------|
|            |                    |          |     | <p>ENSMUSG00000071005, ENSMUSG00000049103,<br/> ENSMUSG00000074115, ENSMUSG00000035385,<br/> ENSMUSG00000050232, ENSMUSG00000000817,<br/> ENSMUSG00000025804, ENSMUSG00000020053,<br/> ENSMUSG00000027398, ENSMUSG00000020651,<br/> ENSMUSG00000000182, ENSMUSG00000079227,<br/> ENSMUSG00000037321, ENSMUSG00000034459,<br/> ENSMUSG00000031765, ENSMUSG00000035042,<br/> ENSMUSG0000002992, ENSMUSG00000030525,<br/> ENSMUSG00000026573, ENSMUSG00000040552,<br/> ENSMUSG00000090125, ENSMUSG00000000982,<br/> ENSMUSG00000045471, ENSMUSG00000023078,<br/> ENSMUSG00000022094, ENSMUSG00000078236,<br/> ENSMUSG00000036986, ENSMUSG00000012428,<br/> ENSMUSG00000024339, ENSMUSG00000037868,<br/> ENSMUSG00000029380, ENSMUSG00000026177</p> |   |    | <p>ENSMUSG00000025889, ENSMUSG00000062515,<br/> ENSMUSG00000070570, ENSMUSG00000025270,<br/> ENSMUSG00000032511, ENSMUSG00000057182,<br/> ENSMUSG00000020524, ENSMUSG00000039952,<br/> ENSMUSG00000090639, ENSMUSG00000032554,<br/> ENSMUSG00000021319, ENSMUSG00000030865,<br/> ENSMUSG0000006269, ENSMUSG00000031209,<br/> ENSMUSG00000026874, ENSMUSG00000018566,<br/> ENSMUSG00000033208, ENSMUSG00000031996,<br/> ENSMUSG00000027513, ENSMUSG00000031760,<br/> ENSMUSG00000074336, ENSMUSG00000032839,<br/> ENSMUSG00000029193, ENSMUSG00000024027,<br/> ENSMUSG00000022878, ENSMUSG00000035458,<br/> ENSMUSG00000032570, ENSMUSG00000005373,<br/> ENSMUSG00000025991, ENSMUSG00000028427,<br/> ENSMUSG0000000889, ENSMUSG00000038239,<br/> ENSMUSG00000027887, ENSMUSG00000050164,<br/> ENSMUSG00000023013, ENSMUSG00000024990,<br/> ENSMUSG00000032081, ENSMUSG00000029205,<br/> ENSMUSG00000032083, ENSMUSG00000030747,<br/> ENSMUSG00000058914, ENSMUSG00000049281,<br/> ENSMUSG00000028167, ENSMUSG00000031425,<br/> ENSMUSG00000031997, ENSMUSG00000006235,<br/> ENSMUSG00000056978, ENSMUSG00000037624,<br/> ENSMUSG00000031980, ENSMUSG00000020532</p> |
| GO:0006950 | response to stress | 2.82E-28 | 169 | ENSMUSG00000034206, ENSMUSG00000036931,                                                                                                                                                                                                                                                                                                                                                                                                                                                                                                                                                                                                                                                                                                         | 1 | 75 | ENSMUSG00000009471, ENSMUSG00000020123,                                                                                                                                                                                                                                                                                                                                                                                                                                                                                                                                                                                                                                                                                                                                                                                                                                                                                                                                                                                                                                                                                                                             |

|  |  |  |                                                                                                                                                                                                                                                                                                                                                                                                                                                                                                                                                                                                                                                                                                                                                                                                                                                                                                                                                                                                                                                                                                                                                           |  |  |                                                                                                                                                                                                                                                                                                                                                                                                                                                                                                                                                                                                                                                                                                                                                                                                                                                                                                                                                                                                                                                                                                                                                           |
|--|--|--|-----------------------------------------------------------------------------------------------------------------------------------------------------------------------------------------------------------------------------------------------------------------------------------------------------------------------------------------------------------------------------------------------------------------------------------------------------------------------------------------------------------------------------------------------------------------------------------------------------------------------------------------------------------------------------------------------------------------------------------------------------------------------------------------------------------------------------------------------------------------------------------------------------------------------------------------------------------------------------------------------------------------------------------------------------------------------------------------------------------------------------------------------------------|--|--|-----------------------------------------------------------------------------------------------------------------------------------------------------------------------------------------------------------------------------------------------------------------------------------------------------------------------------------------------------------------------------------------------------------------------------------------------------------------------------------------------------------------------------------------------------------------------------------------------------------------------------------------------------------------------------------------------------------------------------------------------------------------------------------------------------------------------------------------------------------------------------------------------------------------------------------------------------------------------------------------------------------------------------------------------------------------------------------------------------------------------------------------------------------|
|  |  |  | ENSMUSG00000027995, ENSMUSG00000007080,<br>ENSMUSG00000027699, ENSMUSG00000066861,<br>ENSMUSG00000049103, ENSMUSG00000061232,<br>ENSMUSG00000017830, ENSMUSG00000053977,<br>ENSMUSG00000075404, ENSMUSG00000019942,<br>ENSMUSG00000030268, ENSMUSG00000022504,<br>ENSMUSG00000040296, ENSMUSG00000020053,<br>ENSMUSG00000040264, ENSMUSG00000030144,<br>ENSMUSG00000037321, ENSMUSG00000035365,<br>ENSMUSG00000031551, ENSMUSG00000042489,<br>ENSMUSG00000025473, ENSMUSG00000069874,<br>ENSMUSG00000045322, ENSMUSG00000026068,<br>ENSMUSG00000025492, ENSMUSG00000055994,<br>ENSMUSG0000001228, ENSMUSG00000030149,<br>ENSMUSG00000009292, ENSMUSG00000026896,<br>ENSMUSG00000037313, ENSMUSG00000000982,<br>ENSMUSG00000037474, ENSMUSG00000053175,<br>ENSMUSG00000026656, ENSMUSG00000023913,<br>ENSMUSG00000029075, ENSMUSG00000026582,<br>ENSMUSG00000028268, ENSMUSG00000039396,<br>ENSMUSG00000024079, ENSMUSG00000074151,<br>ENSMUSG00000040613, ENSMUSG00000036905,<br>ENSMUSG00000029664, ENSMUSG00000035352,<br>ENSMUSG00000026822, ENSMUSG00000029379,<br>ENSMUSG00000026429, ENSMUSG00000029811,<br>ENSMUSG00000037202, ENSMUSG00000051439, |  |  | ENSMUSG00000031495, ENSMUSG00000025889,<br>ENSMUSG00000062270, ENSMUSG00000034783,<br>ENSMUSG00000007122, ENSMUSG00000059230,<br>ENSMUSG00000026715, ENSMUSG00000090877,<br>ENSMUSG00000037188, ENSMUSG00000090639,<br>ENSMUSG00000039278, ENSMUSG00000026874,<br>ENSMUSG00000033350, ENSMUSG0000007033,<br>ENSMUSG00000031760, ENSMUSG00000019102,<br>ENSMUSG00000043496, ENSMUSG00000010051,<br>ENSMUSG00000037071, ENSMUSG00000017697,<br>ENSMUSG00000029193, ENSMUSG00000061958,<br>ENSMUSG00000090372, ENSMUSG00000022878,<br>ENSMUSG00000042812, ENSMUSG00000022868,<br>ENSMUSG00000026984, ENSMUSG00000035486,<br>ENSMUSG00000000049, ENSMUSG00000022040,<br>ENSMUSG00000023013, ENSMUSG00000031780,<br>ENSMUSG00000059481, ENSMUSG00000042903,<br>ENSMUSG00000031980, ENSMUSG00000040412,<br>ENSMUSG00000030730, ENSMUSG00000029368,<br>ENSMUSG00000033831, ENSMUSG00000025270,<br>ENSMUSG00000061780, ENSMUSG00000033196,<br>ENSMUSG00000052911, ENSMUSG00000018893,<br>ENSMUSG00000029236, ENSMUSG00000033577,<br>ENSMUSG00000032554, ENSMUSG00000021055,<br>ENSMUSG00000022996, ENSMUSG00000031489,<br>ENSMUSG00000031431, ENSMUSG00000032216, |
|--|--|--|-----------------------------------------------------------------------------------------------------------------------------------------------------------------------------------------------------------------------------------------------------------------------------------------------------------------------------------------------------------------------------------------------------------------------------------------------------------------------------------------------------------------------------------------------------------------------------------------------------------------------------------------------------------------------------------------------------------------------------------------------------------------------------------------------------------------------------------------------------------------------------------------------------------------------------------------------------------------------------------------------------------------------------------------------------------------------------------------------------------------------------------------------------------|--|--|-----------------------------------------------------------------------------------------------------------------------------------------------------------------------------------------------------------------------------------------------------------------------------------------------------------------------------------------------------------------------------------------------------------------------------------------------------------------------------------------------------------------------------------------------------------------------------------------------------------------------------------------------------------------------------------------------------------------------------------------------------------------------------------------------------------------------------------------------------------------------------------------------------------------------------------------------------------------------------------------------------------------------------------------------------------------------------------------------------------------------------------------------------------|

|  |  |  |                                                                                                                                                                                                                                                                                                                                                                                                                                                                                                                                                                                                                                                                                                                                                                                                                                                                                                                                                                                                                                                                                                                                                              |  |                                                                                                                                                                                                                                                                                                                                                                                                                                                                  |
|--|--|--|--------------------------------------------------------------------------------------------------------------------------------------------------------------------------------------------------------------------------------------------------------------------------------------------------------------------------------------------------------------------------------------------------------------------------------------------------------------------------------------------------------------------------------------------------------------------------------------------------------------------------------------------------------------------------------------------------------------------------------------------------------------------------------------------------------------------------------------------------------------------------------------------------------------------------------------------------------------------------------------------------------------------------------------------------------------------------------------------------------------------------------------------------------------|--|------------------------------------------------------------------------------------------------------------------------------------------------------------------------------------------------------------------------------------------------------------------------------------------------------------------------------------------------------------------------------------------------------------------------------------------------------------------|
|  |  |  | ENSMUSG00000032691, ENSMUSG00000030413,<br>ENSMUSG00000027398, ENSMUSG00000027639,<br>ENSMUSG00000034459, ENSMUSG00000028362,<br>ENSMUSG00000055170, ENSMUSG00000079363,<br>ENSMUSG00000035042, ENSMUSG00000034329,<br>ENSMUSG00000039748, ENSMUSG00000058715,<br>ENSMUSG00000017832, ENSMUSG00000004296,<br>ENSMUSG00000076612, ENSMUSG00000000791,<br>ENSMUSG00000050896, ENSMUSG00000015947,<br>ENSMUSG00000021624, ENSMUSG00000040026,<br>ENSMUSG00000023078, ENSMUSG000000041515,<br>ENSMUSG00000037440, ENSMUSG00000020415,<br>ENSMUSG00000078920, ENSMUSG00000036986,<br>ENSMUSG00000024401, ENSMUSG00000090231,<br>ENSMUSG00000054588, ENSMUSG00000026580,<br>ENSMUSG00000025746, ENSMUSG00000004328,<br>ENSMUSG00000033777, ENSMUSG000000060802,<br>ENSMUSG00000058755, ENSMUSG00000009185,<br>ENSMUSG00000079563, ENSMUSG00000016529,<br>ENSMUSG00000037731, ENSMUSG00000030148,<br>ENSMUSG00000018930, ENSMUSG00000070034,<br>ENSMUSG00000049502, ENSMUSG00000040253,<br>ENSMUSG00000023341, ENSMUSG00000046591,<br>ENSMUSG00000026222, ENSMUSG00000034652,<br>ENSMUSG00000025804, ENSMUSG00000051498,<br>ENSMUSG00000046718, ENSMUSG00000022534, |  | ENSMUSG00000091971, ENSMUSG00000020623,<br>ENSMUSG00000032060, ENSMUSG00000024386,<br>ENSMUSG00000046834, ENSMUSG00000060180,<br>ENSMUSG00000029361, ENSMUSG00000073465,<br>ENSMUSG00000057880, ENSMUSG00000019326,<br>ENSMUSG00000024039, ENSMUSG00000032911,<br>ENSMUSG00000036216, ENSMUSG00000007815,<br>ENSMUSG00000035459, ENSMUSG00000000889,<br>ENSMUSG00000027559, ENSMUSG00000051456,<br>ENSMUSG00000062778, ENSMUSG00000056978,<br>ENSMUSG00000010047 |
|--|--|--|--------------------------------------------------------------------------------------------------------------------------------------------------------------------------------------------------------------------------------------------------------------------------------------------------------------------------------------------------------------------------------------------------------------------------------------------------------------------------------------------------------------------------------------------------------------------------------------------------------------------------------------------------------------------------------------------------------------------------------------------------------------------------------------------------------------------------------------------------------------------------------------------------------------------------------------------------------------------------------------------------------------------------------------------------------------------------------------------------------------------------------------------------------------|--|------------------------------------------------------------------------------------------------------------------------------------------------------------------------------------------------------------------------------------------------------------------------------------------------------------------------------------------------------------------------------------------------------------------------------------------------------------------|

|  |  |  |  |                                                                                                                                                                                                                                                                                                                                                                                                                                                                                                                                                                                                                                                                                                                                                                                                                                                                                                                                                                                                                                                                                                                                                          |  |  |  |
|--|--|--|--|----------------------------------------------------------------------------------------------------------------------------------------------------------------------------------------------------------------------------------------------------------------------------------------------------------------------------------------------------------------------------------------------------------------------------------------------------------------------------------------------------------------------------------------------------------------------------------------------------------------------------------------------------------------------------------------------------------------------------------------------------------------------------------------------------------------------------------------------------------------------------------------------------------------------------------------------------------------------------------------------------------------------------------------------------------------------------------------------------------------------------------------------------------|--|--|--|
|  |  |  |  | ENSMUSG00000078773, ENSMUSG00000054072,<br>ENSMUSG00000034855, ENSMUSG00000026770,<br>ENSMUSG00000044701, ENSMUSG00000005696,<br>ENSMUSG00000039236, ENSMUSG00000018920,<br>ENSMUSG00000079362, ENSMUSG00000022548,<br>ENSMUSG00000030525, ENSMUSG00000028270,<br>ENSMUSG00000035373, ENSMUSG00000024371,<br>ENSMUSG00000038357, ENSMUSG00000057465,<br>ENSMUSG00000055172, ENSMUSG00000030793,<br>ENSMUSG0000003283, ENSMUSG00000051235,<br>ENSMUSG00000030867, ENSMUSG00000048806,<br>ENSMUSG0000000386, ENSMUSG00000044583,<br>ENSMUSG00000029380, ENSMUSG00000053219,<br>ENSMUSG00000037872, ENSMUSG00000030017,<br>ENSMUSG00000024791, ENSMUSG00000058427,<br>ENSMUSG00000029417, ENSMUSG00000031444,<br>ENSMUSG00000029298, ENSMUSG00000074115,<br>ENSMUSG00000035385, ENSMUSG00000020641,<br>ENSMUSG00000030677, ENSMUSG00000040017,<br>ENSMUSG00000026166, ENSMUSG00000017146,<br>ENSMUSG00000028874, ENSMUSG00000029915,<br>ENSMUSG00000073489, ENSMUSG00000026011,<br>ENSMUSG00000079227, ENSMUSG00000027514,<br>ENSMUSG00000021423, ENSMUSG00000028269,<br>ENSMUSG00000026104, ENSMUSG00000092005,<br>ENSMUSG00000056529, ENSMUSG00000024349, |  |  |  |
|--|--|--|--|----------------------------------------------------------------------------------------------------------------------------------------------------------------------------------------------------------------------------------------------------------------------------------------------------------------------------------------------------------------------------------------------------------------------------------------------------------------------------------------------------------------------------------------------------------------------------------------------------------------------------------------------------------------------------------------------------------------------------------------------------------------------------------------------------------------------------------------------------------------------------------------------------------------------------------------------------------------------------------------------------------------------------------------------------------------------------------------------------------------------------------------------------------|--|--|--|

|            |                                                |                 |    |                                                                                                                                                                                                                                                                                                                                                                                                                                                                                                                                                                                                   |   |    |                                                                                                                                                                                                                                                                |
|------------|------------------------------------------------|-----------------|----|---------------------------------------------------------------------------------------------------------------------------------------------------------------------------------------------------------------------------------------------------------------------------------------------------------------------------------------------------------------------------------------------------------------------------------------------------------------------------------------------------------------------------------------------------------------------------------------------------|---|----|----------------------------------------------------------------------------------------------------------------------------------------------------------------------------------------------------------------------------------------------------------------|
|            |                                                |                 |    | ENSMUSG00000026981, ENSMUSG00000022901,<br>ENSMUSG00000049734, ENSMUSG00000044827,<br>ENSMUSG00000029371, ENSMUSG00000032661,<br>ENSMUSG00000046879, ENSMUSG00000024529,<br>ENSMUSG00000034438, ENSMUSG00000041347,<br>ENSMUSG00000026177                                                                                                                                                                                                                                                                                                                                                         |   |    |                                                                                                                                                                                                                                                                |
| GO:0032496 | response to<br>lipopolysaccharide              | 6.32E-10        | 27 | ENSMUSG00000024079, ENSMUSG00000055170,<br>ENSMUSG00000026104, ENSMUSG00000079362,<br>ENSMUSG00000056529, ENSMUSG00000035042,<br>ENSMUSG00000055994, ENSMUSG00000030149,<br>ENSMUSG00000028270, ENSMUSG00000051439,<br>ENSMUSG00000035385, ENSMUSG00000000982,<br>ENSMUSG00000004296, ENSMUSG00000020638,<br>ENSMUSG00000041515, ENSMUSG00000029371,<br>ENSMUSG00000024401, ENSMUSG00000054588,<br>ENSMUSG00000025804, ENSMUSG00000027398,<br>ENSMUSG00000059089, ENSMUSG00000041347,<br>ENSMUSG00000079227, ENSMUSG00000022126,<br>ENSMUSG00000031551, ENSMUSG00000053219,<br>ENSMUSG00000026177 | 1 | 4  | ENSMUSG00000020889, ENSMUSG00000025991,<br>ENSMUSG00000025889, ENSMUSG00000028036                                                                                                                                                                              |
| GO:0032101 | regulation of response to<br>external stimulus | 0.00014283<br>8 | 34 | ENSMUSG00000035673, ENSMUSG00000071005,<br>ENSMUSG00000049103, ENSMUSG00000016529,<br>ENSMUSG00000035385, ENSMUSG00000018930,<br>ENSMUSG00000025804, ENSMUSG00000027398,<br>ENSMUSG00000079227, ENSMUSG00000034855,<br>ENSMUSG00000031551, ENSMUSG00000026770,                                                                                                                                                                                                                                                                                                                                    | 1 | 25 | ENSMUSG00000031380, ENSMUSG00000009471,<br>ENSMUSG00000042812, ENSMUSG00000025810,<br>ENSMUSG00000032547, ENSMUSG00000059201,<br>ENSMUSG00000022868, ENSMUSG00000019326,<br>ENSMUSG00000062515, ENSMUSG00000026715,<br>ENSMUSG00000031841, ENSMUSG00000024028, |

|            |                       |          |     |                                                                                                                                                                                                                                                                                                                                                                                                                                                                                                                                                                                                                                                                                                      |   |    |                                                                                                                                                                                                                                                                                                                                                                                                                                                                                                                                                                                                                                                       |
|------------|-----------------------|----------|-----|------------------------------------------------------------------------------------------------------------------------------------------------------------------------------------------------------------------------------------------------------------------------------------------------------------------------------------------------------------------------------------------------------------------------------------------------------------------------------------------------------------------------------------------------------------------------------------------------------------------------------------------------------------------------------------------------------|---|----|-------------------------------------------------------------------------------------------------------------------------------------------------------------------------------------------------------------------------------------------------------------------------------------------------------------------------------------------------------------------------------------------------------------------------------------------------------------------------------------------------------------------------------------------------------------------------------------------------------------------------------------------------------|
|            |                       |          |     | <p>ENSMUSG00000025473, ENSMUSG00000045322,<br/> ENSMUSG00000022548, ENSMUSG00000055994,<br/> ENSMUSG00000035042, ENSMUSG00000058715,<br/> ENSMUSG00000030525, ENSMUSG00000026573,<br/> ENSMUSG00000040552, ENSMUSG00000035373,<br/> ENSMUSG00000021322, ENSMUSG0000004296,<br/> ENSMUSG0000000982, ENSMUSG00000015947,<br/> ENSMUSG00000026656, ENSMUSG00000023913,<br/> ENSMUSG00000023078, ENSMUSG00000024401,<br/> ENSMUSG00000024397, ENSMUSG00000026580,<br/> ENSMUSG00000025746, ENSMUSG00000030111</p>                                                                                                                                                                                        |   |    | <p>ENSMUSG00000026874, ENSMUSG0000000049,<br/> ENSMUSG00000031760, ENSMUSG00000024653,<br/> ENSMUSG00000001300, ENSMUSG00000017697,<br/> ENSMUSG00000059481, ENSMUSG00000024386,<br/> ENSMUSG00000031980, ENSMUSG00000022878,<br/> ENSMUSG00000073424, ENSMUSG00000010047,<br/> ENSMUSG00000040412</p>                                                                                                                                                                                                                                                                                                                                                |
| GO:0002376 | immune system process | 6.91E-68 | 177 | <p>ENSMUSG00000027995, ENSMUSG00000048534,<br/> ENSMUSG00000036887, ENSMUSG00000066861,<br/> ENSMUSG00000049103, ENSMUSG00000061232,<br/> ENSMUSG00000017830, ENSMUSG00000053977,<br/> ENSMUSG00000075404, ENSMUSG00000050232,<br/> ENSMUSG00000022831, ENSMUSG00000000817,<br/> ENSMUSG00000030786, ENSMUSG00000022504,<br/> ENSMUSG00000040296, ENSMUSG00000040264,<br/> ENSMUSG00000030144, ENSMUSG00000037321,<br/> ENSMUSG00000025473, ENSMUSG00000030142,<br/> ENSMUSG00000069874, ENSMUSG00000045322,<br/> ENSMUSG00000026068, ENSMUSG00000030954,<br/> ENSMUSG00000025492, ENSMUSG00000001444,<br/> ENSMUSG00000055994, ENSMUSG00000030149,<br/> ENSMUSG00000026896, ENSMUSG00000037313,</p> | 1 | 28 | <p>ENSMUSG00000055653, ENSMUSG00000059201,<br/> ENSMUSG00000025889, ENSMUSG00000019326,<br/> ENSMUSG00000061780, ENSMUSG00000025270,<br/> ENSMUSG00000034783, ENSMUSG00000018893,<br/> ENSMUSG00000090639, ENSMUSG00000032554,<br/> ENSMUSG0000000889, ENSMUSG00000059327,<br/> ENSMUSG00000031209, ENSMUSG00000061311,<br/> ENSMUSG00000052305, ENSMUSG00000026874,<br/> ENSMUSG00000039004, ENSMUSG00000073940,<br/> ENSMUSG00000022996, ENSMUSG00000043496,<br/> ENSMUSG00000017697, ENSMUSG00000059481,<br/> ENSMUSG00000036867, ENSMUSG00000046834,<br/> ENSMUSG00000023235, ENSMUSG00000055609,<br/> ENSMUSG00000010047, ENSMUSG00000026532</p> |



|  |  |  |                                                                                                                                                                                                                                                                                                                                                                                                                                                                                                                                                                                                                                                                                                                                                                                                                                                                                                                                                                                                                                                                                                                                                           |  |  |  |
|--|--|--|-----------------------------------------------------------------------------------------------------------------------------------------------------------------------------------------------------------------------------------------------------------------------------------------------------------------------------------------------------------------------------------------------------------------------------------------------------------------------------------------------------------------------------------------------------------------------------------------------------------------------------------------------------------------------------------------------------------------------------------------------------------------------------------------------------------------------------------------------------------------------------------------------------------------------------------------------------------------------------------------------------------------------------------------------------------------------------------------------------------------------------------------------------------|--|--|--|
|  |  |  | ENSMUSG0000000982, ENSMUSG00000029304,<br>ENSMUSG00000038067, ENSMUSG00000053175,<br>ENSMUSG00000026656, ENSMUSG00000029075,<br>ENSMUSG00000001131, ENSMUSG00000026582,<br>ENSMUSG00000028268, ENSMUSG00000038418,<br>ENSMUSG00000058818, ENSMUSG00000024338,<br>ENSMUSG00000074151, ENSMUSG00000040613,<br>ENSMUSG00000036905, ENSMUSG00000040528,<br>ENSMUSG00000035352, ENSMUSG00000026822,<br>ENSMUSG00000029379, ENSMUSG00000071005,<br>ENSMUSG00000047798, ENSMUSG00000037202,<br>ENSMUSG00000051439, ENSMUSG00000032691,<br>ENSMUSG00000030413, ENSMUSG00000062007,<br>ENSMUSG00000027398, ENSMUSG00000059089,<br>ENSMUSG00000027639, ENSMUSG00000034459,<br>ENSMUSG00000028362, ENSMUSG00000055170,<br>ENSMUSG00000068227, ENSMUSG00000079363,<br>ENSMUSG00000027843, ENSMUSG00000067341,<br>ENSMUSG00000035042, ENSMUSG00000039748,<br>ENSMUSG00000035186, ENSMUSG00000058715,<br>ENSMUSG00000004296, ENSMUSG00000076612,<br>ENSMUSG00000000791, ENSMUSG00000015947,<br>ENSMUSG00000021624, ENSMUSG00000023078,<br>ENSMUSG00000041515, ENSMUSG00000037440,<br>ENSMUSG00000034394, ENSMUSG00000036986,<br>ENSMUSG00000024401, ENSMUSG00000073409, |  |  |  |
|--|--|--|-----------------------------------------------------------------------------------------------------------------------------------------------------------------------------------------------------------------------------------------------------------------------------------------------------------------------------------------------------------------------------------------------------------------------------------------------------------------------------------------------------------------------------------------------------------------------------------------------------------------------------------------------------------------------------------------------------------------------------------------------------------------------------------------------------------------------------------------------------------------------------------------------------------------------------------------------------------------------------------------------------------------------------------------------------------------------------------------------------------------------------------------------------------|--|--|--|

|  |  |  |                                                                                                                                                                                                                                                                                                                                                                                                                                                                                                                                                                                                                                                                                                                                                                                                                                                                                                                                                                                                                                                                                                                                                           |  |  |  |
|--|--|--|-----------------------------------------------------------------------------------------------------------------------------------------------------------------------------------------------------------------------------------------------------------------------------------------------------------------------------------------------------------------------------------------------------------------------------------------------------------------------------------------------------------------------------------------------------------------------------------------------------------------------------------------------------------------------------------------------------------------------------------------------------------------------------------------------------------------------------------------------------------------------------------------------------------------------------------------------------------------------------------------------------------------------------------------------------------------------------------------------------------------------------------------------------------|--|--|--|
|  |  |  | ENSMUSG00000090231, ENSMUSG00000054588,<br>ENSMUSG00000026580, ENSMUSG00000025746,<br>ENSMUSG00000049109, ENSMUSG00000033777,<br>ENSMUSG00000060802, ENSMUSG00000058755,<br>ENSMUSG00000009185, ENSMUSG00000018899,<br>ENSMUSG00000016529, ENSMUSG00000015437,<br>ENSMUSG00000060550, ENSMUSG00000028072,<br>ENSMUSG00000030148, ENSMUSG00000018930,<br>ENSMUSG00000078452, ENSMUSG00000070034,<br>ENSMUSG00000040253, ENSMUSG00000023341,<br>ENSMUSG00000026222, ENSMUSG00000034652,<br>ENSMUSG00000025804, ENSMUSG00000051498,<br>ENSMUSG00000046718, ENSMUSG00000054072,<br>ENSMUSG00000034855, ENSMUSG00000091875,<br>ENSMUSG00000026770, ENSMUSG00000044701,<br>ENSMUSG0000005696, ENSMUSG00000039236,<br>ENSMUSG00000018920, ENSMUSG00000079362,<br>ENSMUSG00000070427, ENSMUSG00000040751,<br>ENSMUSG00000030525, ENSMUSG00000040552,<br>ENSMUSG00000040627, ENSMUSG00000028270,<br>ENSMUSG00000035373, ENSMUSG00000024371,<br>ENSMUSG00000055172, ENSMUSG00000025498,<br>ENSMUSG00000050241, ENSMUSG00000003283,<br>ENSMUSG00000048806, ENSMUSG00000000386,<br>ENSMUSG00000044583, ENSMUSG00000029380,<br>ENSMUSG00000027832, ENSMUSG00000074148, |  |  |  |
|--|--|--|-----------------------------------------------------------------------------------------------------------------------------------------------------------------------------------------------------------------------------------------------------------------------------------------------------------------------------------------------------------------------------------------------------------------------------------------------------------------------------------------------------------------------------------------------------------------------------------------------------------------------------------------------------------------------------------------------------------------------------------------------------------------------------------------------------------------------------------------------------------------------------------------------------------------------------------------------------------------------------------------------------------------------------------------------------------------------------------------------------------------------------------------------------------|--|--|--|

|            |                               |          |     |                                                                                                                                                                                                                                                                                                                                                                                                                                                                                                                                                                                                                                                                                                                                                                                                                                                                                                                                                          |   |    |                                                                                                                                                                          |
|------------|-------------------------------|----------|-----|----------------------------------------------------------------------------------------------------------------------------------------------------------------------------------------------------------------------------------------------------------------------------------------------------------------------------------------------------------------------------------------------------------------------------------------------------------------------------------------------------------------------------------------------------------------------------------------------------------------------------------------------------------------------------------------------------------------------------------------------------------------------------------------------------------------------------------------------------------------------------------------------------------------------------------------------------------|---|----|--------------------------------------------------------------------------------------------------------------------------------------------------------------------------|
|            |                               |          |     | ENSMUSG00000058427, ENSMUSG00000035673,<br>ENSMUSG00000029417, ENSMUSG00000071068,<br>ENSMUSG00000029298, ENSMUSG00000074115,<br>ENSMUSG00000035385, ENSMUSG00000020641,<br>ENSMUSG00000073411, ENSMUSG00000026166,<br>ENSMUSG00000075122, ENSMUSG00000028874,<br>ENSMUSG00000029915, ENSMUSG00000073489,<br>ENSMUSG00000030365, ENSMUSG00000026011,<br>ENSMUSG00000027514, ENSMUSG00000036469,<br>ENSMUSG00000067212, ENSMUSG00000041324,<br>ENSMUSG00000021423, ENSMUSG00000028269,<br>ENSMUSG00000026104, ENSMUSG00000092005,<br>ENSMUSG0000002699, ENSMUSG00000024349,<br>ENSMUSG00000026573, ENSMUSG00000035929,<br>ENSMUSG00000020310, ENSMUSG00000022901,<br>ENSMUSG00000025001, ENSMUSG00000044827,<br>ENSMUSG00000029371, ENSMUSG00000032661,<br>ENSMUSG00000046879, ENSMUSG00000034116,<br>ENSMUSG00000021765, ENSMUSG00000034438,<br>ENSMUSG00000024339, ENSMUSG00000024337,<br>ENSMUSG00000039146, ENSMUSG00000026177,<br>ENSMUSG00000032218 |   |    |                                                                                                                                                                          |
| GO:0010033 | response to organic substance | 2.51E-14 | 114 | ENSMUSG00000060802, ENSMUSG00000027995,<br>ENSMUSG00000066363, ENSMUSG00000041481,<br>ENSMUSG00000066861, ENSMUSG00000049103,<br>ENSMUSG00000018899, ENSMUSG00000016529,                                                                                                                                                                                                                                                                                                                                                                                                                                                                                                                                                                                                                                                                                                                                                                                 | 1 | 58 | ENSMUSG00000031134, ENSMUSG00000009471,<br>ENSMUSG00000020123, ENSMUSG00000030730,<br>ENSMUSG00000025810, ENSMUSG00000027796,<br>ENSMUSG00000012705, ENSMUSG00000025889, |

|  |  |  |                                                                                                                                                                                                                                                                                                                                                                                                                                                                                                                                                                                                                                                                                                                                                                                                                                                                                                                                                                                                                                                                                                                                                          |  |  |                                                                                                                                                                                                                                                                                                                                                                                                                                                                                                                                                                                                                                                                                                                                                                                                                                                                                                                                                                                                                                                                                                              |
|--|--|--|----------------------------------------------------------------------------------------------------------------------------------------------------------------------------------------------------------------------------------------------------------------------------------------------------------------------------------------------------------------------------------------------------------------------------------------------------------------------------------------------------------------------------------------------------------------------------------------------------------------------------------------------------------------------------------------------------------------------------------------------------------------------------------------------------------------------------------------------------------------------------------------------------------------------------------------------------------------------------------------------------------------------------------------------------------------------------------------------------------------------------------------------------------|--|--|--------------------------------------------------------------------------------------------------------------------------------------------------------------------------------------------------------------------------------------------------------------------------------------------------------------------------------------------------------------------------------------------------------------------------------------------------------------------------------------------------------------------------------------------------------------------------------------------------------------------------------------------------------------------------------------------------------------------------------------------------------------------------------------------------------------------------------------------------------------------------------------------------------------------------------------------------------------------------------------------------------------------------------------------------------------------------------------------------------------|
|  |  |  | ENSMUSG00000078853, ENSMUSG00000026073,<br>ENSMUSG00000075404, ENSMUSG00000019942,<br>ENSMUSG00000022831, ENSMUSG00000028072,<br>ENSMUSG00000054203, ENSMUSG00000058207,<br>ENSMUSG00000040253, ENSMUSG00000022504,<br>ENSMUSG00000026222, ENSMUSG00000025804,<br>ENSMUSG00000040264, ENSMUSG00000051498,<br>ENSMUSG00000045932, ENSMUSG00000021091,<br>ENSMUSG0000000182, ENSMUSG00000054072,<br>ENSMUSG00000031551, ENSMUSG00000026770,<br>ENSMUSG00000091875, ENSMUSG00000038037,<br>ENSMUSG00000018920, ENSMUSG00000069874,<br>ENSMUSG00000045322, ENSMUSG00000026068,<br>ENSMUSG00000025492, ENSMUSG00000079362,<br>ENSMUSG00000055994, ENSMUSG00000030149,<br>ENSMUSG00000030525, ENSMUSG00000028270,<br>ENSMUSG00000000982, ENSMUSG00000029304,<br>ENSMUSG00000026656, ENSMUSG00000050635,<br>ENSMUSG00000030793, ENSMUSG00000026582,<br>ENSMUSG00000028268, ENSMUSG00000028068,<br>ENSMUSG00000022622, ENSMUSG00000038418,<br>ENSMUSG00000048806, ENSMUSG00000058818,<br>ENSMUSG00000079014, ENSMUSG00000022126,<br>ENSMUSG00000053219, ENSMUSG00000024079,<br>ENSMUSG00000040613, ENSMUSG00000078922,<br>ENSMUSG0000003665, ENSMUSG00000058427, |  |  | ENSMUSG00000055980, ENSMUSG00000046532,<br>ENSMUSG00000018893, ENSMUSG00000046714,<br>ENSMUSG00000090877, ENSMUSG00000031841,<br>ENSMUSG00000061393, ENSMUSG00000067951,<br>ENSMUSG00000024028, ENSMUSG00000032418,<br>ENSMUSG00000018566, ENSMUSG00000021055,<br>ENSMUSG00000020889, ENSMUSG00000027513,<br>ENSMUSG0000005705, ENSMUSG00000022996,<br>ENSMUSG00000031760, ENSMUSG00000029195,<br>ENSMUSG00000019102, ENSMUSG00000032449,<br>ENSMUSG00000010051, ENSMUSG00000017697,<br>ENSMUSG00000038776, ENSMUSG00000026459,<br>ENSMUSG00000030244, ENSMUSG00000029361,<br>ENSMUSG00000073465, ENSMUSG00000057880,<br>ENSMUSG00000022878, ENSMUSG00000024027,<br>ENSMUSG00000042812, ENSMUSG00000041658,<br>ENSMUSG00000059201, ENSMUSG00000005373,<br>ENSMUSG00000035486, ENSMUSG00000025991,<br>ENSMUSG00000001494, ENSMUSG00000000889,<br>ENSMUSG00000027820, ENSMUSG00000031144,<br>ENSMUSG00000024990, ENSMUSG00000032081,<br>ENSMUSG00000024653, ENSMUSG00000030747,<br>ENSMUSG00000028036, ENSMUSG00000042903,<br>ENSMUSG0000006235, ENSMUSG00000020532,<br>ENSMUSG00000028307, ENSMUSG00000010047 |
|--|--|--|----------------------------------------------------------------------------------------------------------------------------------------------------------------------------------------------------------------------------------------------------------------------------------------------------------------------------------------------------------------------------------------------------------------------------------------------------------------------------------------------------------------------------------------------------------------------------------------------------------------------------------------------------------------------------------------------------------------------------------------------------------------------------------------------------------------------------------------------------------------------------------------------------------------------------------------------------------------------------------------------------------------------------------------------------------------------------------------------------------------------------------------------------------|--|--|--------------------------------------------------------------------------------------------------------------------------------------------------------------------------------------------------------------------------------------------------------------------------------------------------------------------------------------------------------------------------------------------------------------------------------------------------------------------------------------------------------------------------------------------------------------------------------------------------------------------------------------------------------------------------------------------------------------------------------------------------------------------------------------------------------------------------------------------------------------------------------------------------------------------------------------------------------------------------------------------------------------------------------------------------------------------------------------------------------------|

|  |  |  |  |                                                                                                                                                                                                                                                                                                                                                                                                                                                                                                                                                                                                                                                                                                                                                                                                                                                                                                                                                                                                                                                                                                                                                            |  |  |  |
|--|--|--|--|------------------------------------------------------------------------------------------------------------------------------------------------------------------------------------------------------------------------------------------------------------------------------------------------------------------------------------------------------------------------------------------------------------------------------------------------------------------------------------------------------------------------------------------------------------------------------------------------------------------------------------------------------------------------------------------------------------------------------------------------------------------------------------------------------------------------------------------------------------------------------------------------------------------------------------------------------------------------------------------------------------------------------------------------------------------------------------------------------------------------------------------------------------|--|--|--|
|  |  |  |  | ENSMUSG00000071005, ENSMUSG00000029377,<br>ENSMUSG00000029811, ENSMUSG00000029298,<br>ENSMUSG00000043263, ENSMUSG00000051439,<br>ENSMUSG00000029378, ENSMUSG00000027199,<br>ENSMUSG00000035385, ENSMUSG00000020638,<br>ENSMUSG00000017146, ENSMUSG00000073489,<br>ENSMUSG00000037860, ENSMUSG00000039997,<br>ENSMUSG00000026535, ENSMUSG00000027398,<br>ENSMUSG00000059089, ENSMUSG00000079227,<br>ENSMUSG00000034459, ENSMUSG00000041324,<br>ENSMUSG00000055170, ENSMUSG00000068227,<br>ENSMUSG00000028269, ENSMUSG00000079363,<br>ENSMUSG00000026104, ENSMUSG00000035042,<br>ENSMUSG00000056529, ENSMUSG00000071714,<br>ENSMUSG00000024349, ENSMUSG00000026573,<br>ENSMUSG00000004296, ENSMUSG00000026981,<br>ENSMUSG00000000791, ENSMUSG00000049734,<br>ENSMUSG00000029371, ENSMUSG00000041515,<br>ENSMUSG00000044827, ENSMUSG00000023078,<br>ENSMUSG00000073555, ENSMUSG00000074896,<br>ENSMUSG00000079012, ENSMUSG00000036986,<br>ENSMUSG00000024529, ENSMUSG00000024401,<br>ENSMUSG00000034438, ENSMUSG00000054588,<br>ENSMUSG00000026580, ENSMUSG00000024339,<br>ENSMUSG00000037868, ENSMUSG00000025746,<br>ENSMUSG00000041347, ENSMUSG00000071713, |  |  |  |
|--|--|--|--|------------------------------------------------------------------------------------------------------------------------------------------------------------------------------------------------------------------------------------------------------------------------------------------------------------------------------------------------------------------------------------------------------------------------------------------------------------------------------------------------------------------------------------------------------------------------------------------------------------------------------------------------------------------------------------------------------------------------------------------------------------------------------------------------------------------------------------------------------------------------------------------------------------------------------------------------------------------------------------------------------------------------------------------------------------------------------------------------------------------------------------------------------------|--|--|--|

|            |                                                                                               |                 |    |                                                                                                                                                                                                                                                                                                                                                                                                                                                      |   |   |                                        |
|------------|-----------------------------------------------------------------------------------------------|-----------------|----|------------------------------------------------------------------------------------------------------------------------------------------------------------------------------------------------------------------------------------------------------------------------------------------------------------------------------------------------------------------------------------------------------------------------------------------------------|---|---|----------------------------------------|
|            |                                                                                               |                 |    | ENSMUSG0000066361, ENSMUSG00000026177                                                                                                                                                                                                                                                                                                                                                                                                                |   |   |                                        |
| GO:0002263 | cell activation involved in immune response                                                   | 9.62E-06        | 17 | ENSMUSG00000055170, ENSMUSG00000040528, ENSMUSG00000027995, ENSMUSG00000045322, ENSMUSG00000055994, ENSMUSG00000040751, ENSMUSG00000035673, ENSMUSG00000039748, ENSMUSG00000058715, ENSMUSG00000040627, ENSMUSG00000000982, ENSMUSG0000004296, ENSMUSG00000053175, ENSMUSG00000034652, ENSMUSG00000044583, ENSMUSG00000051498, ENSMUSG00000026177                                                                                                    | 1 | 0 |                                        |
| GO:0052552 | modulation by organism of immune response of other organism involved in symbiotic interaction | 0.00351362<br>7 | 5  | ENSMUSG00000027995, ENSMUSG00000045322, ENSMUSG00000044583, ENSMUSG00000051498, ENSMUSG00000055994                                                                                                                                                                                                                                                                                                                                                   | 1 | 0 |                                        |
| GO:0002696 | positive regulation of leukocyte activation                                                   | 0.00176433<br>9 | 22 | ENSMUSG00000055170, ENSMUSG00000001444, ENSMUSG00000035042, ENSMUSG00000055994, ENSMUSG00000058715, ENSMUSG00000026573, ENSMUSG00000049103, ENSMUSG00000035385, ENSMUSG0000004296, ENSMUSG0000000791, ENSMUSG00000022901, ENSMUSG00000029075, ENSMUSG00000037440, ENSMUSG00000075122, ENSMUSG00000028874, ENSMUSG00000016498, ENSMUSG00000024397, ENSMUSG00000025746, ENSMUSG00000020053, ENSMUSG00000027398, ENSMUSG00000026770, ENSMUSG00000025473 | 1 | 2 | ENSMUSG00000026532, ENSMUSG00000017697 |
| GO:0052572 | response to host immune                                                                       | 0.00907611      | 5  | ENSMUSG00000027995, ENSMUSG00000045322,                                                                                                                                                                                                                                                                                                                                                                                                              | 1 | 0 |                                        |

|            |                                                      |                 |    |                                                                                                                                                                                                                                                                                                                                                                                                                                                                                                      |   |   |                                                                                                                                  |
|------------|------------------------------------------------------|-----------------|----|------------------------------------------------------------------------------------------------------------------------------------------------------------------------------------------------------------------------------------------------------------------------------------------------------------------------------------------------------------------------------------------------------------------------------------------------------------------------------------------------------|---|---|----------------------------------------------------------------------------------------------------------------------------------|
|            | response                                             |                 |    | ENSMUSG00000044583, ENSMUSG000000051498,<br>ENSMUSG000000055994                                                                                                                                                                                                                                                                                                                                                                                                                                      |   |   |                                                                                                                                  |
| GO:0001816 | cytokine production                                  | 0.00522324<br>2 | 14 | ENSMUSG00000025498, ENSMUSG000000029371,<br>ENSMUSG00000030793, ENSMUSG000000056529,<br>ENSMUSG000000055994, ENSMUSG00000002699,<br>ENSMUSG00000037860, ENSMUSG000000024349,<br>ENSMUSG00000070691, ENSMUSG000000026573,<br>ENSMUSG00000027398, ENSMUSG000000031551,<br>ENSMUSG00000026177, ENSMUSG000000032691                                                                                                                                                                                      | 1 | 3 | ENSMUSG00000062515, ENSMUSG00000000889,<br>ENSMUSG000000031980                                                                   |
| GO:0071219 | cellular response to molecule<br>of bacterial origin | 1.67E-12        | 22 | ENSMUSG000000055170, ENSMUSG000000027995,<br>ENSMUSG00000026104, ENSMUSG000000079362,<br>ENSMUSG000000035042, ENSMUSG000000055994,<br>ENSMUSG000000030149, ENSMUSG000000028270,<br>ENSMUSG000000051439, ENSMUSG000000035385,<br>ENSMUSG00000000982, ENSMUSG00000004296,<br>ENSMUSG00000026656, ENSMUSG000000020638,<br>ENSMUSG000000041515, ENSMUSG000000044827,<br>ENSMUSG00000024401, ENSMUSG000000054588,<br>ENSMUSG00000027398, ENSMUSG000000051498,<br>ENSMUSG000000059089, ENSMUSG000000053219 | 1 | 0 |                                                                                                                                  |
| GO:0000280 | nuclear division                                     | 7.66E-18        | 47 | ENSMUSG00000017716, ENSMUSG00000015880,<br>ENSMUSG00000024791, ENSMUSG000000050107,<br>ENSMUSG00000045273, ENSMUSG000000024989,<br>ENSMUSG000000068744, ENSMUSG00000019942,<br>ENSMUSG000000045328, ENSMUSG000000006398,<br>ENSMUSG000000028873, ENSMUSG00000002055,                                                                                                                                                                                                                                 | 1 | 6 | ENSMUSG00000007815, ENSMUSG000000025862,<br>ENSMUSG00000001403, ENSMUSG000000062380,<br>ENSMUSG000000031176, ENSMUSG000000036782 |

|            |                                                        |                 |     |                                                                                                                                                                                                                                                                                                                                                                                                                                                                                                                                                                                                                                                                                                                            |   |   |                                                                                                                                                                                    |
|------------|--------------------------------------------------------|-----------------|-----|----------------------------------------------------------------------------------------------------------------------------------------------------------------------------------------------------------------------------------------------------------------------------------------------------------------------------------------------------------------------------------------------------------------------------------------------------------------------------------------------------------------------------------------------------------------------------------------------------------------------------------------------------------------------------------------------------------------------------|---|---|------------------------------------------------------------------------------------------------------------------------------------------------------------------------------------|
|            |                                                        |                 |     | ENSMUSG00000027379, ENSMUSG00000024056, ENSMUSG00000027469, ENSMUSG00000027331, ENSMUSG00000027715, ENSMUSG00000029414, ENSMUSG00000044201, ENSMUSG00000026683, ENSMUSG00000023505, ENSMUSG00000041431, ENSMUSG00000040084, ENSMUSG00000036223, ENSMUSG00000027306, ENSMUSG00000023015, ENSMUSG00000024795, ENSMUSG00000069910, ENSMUSG00000025001, ENSMUSG00000048922, ENSMUSG00000051378, ENSMUSG00000020897, ENSMUSG00000017499, ENSMUSG00000071350, ENSMUSG00000020415, ENSMUSG00000028678, ENSMUSG00000012443, ENSMUSG00000030867, ENSMUSG00000074476, ENSMUSG00000017861, ENSMUSG00000023940, ENSMUSG00000072082, ENSMUSG00000026779, ENSMUSG00000033952, ENSMUSG00000058290, ENSMUSG00000032218, ENSMUSG00000027496 |   |   |                                                                                                                                                                                    |
| GO:0001911 | negative regulation of leukocyte mediated cytotoxicity | 0.00916696<br>9 | 6   | ENSMUSG00000024339, ENSMUSG00000050241, ENSMUSG00000073406, ENSMUSG00000037321, ENSMUSG00000079298, ENSMUSG00000079620                                                                                                                                                                                                                                                                                                                                                                                                                                                                                                                                                                                                     | 1 | 0 |                                                                                                                                                                                    |
| GO:0006955 | immune response                                        | 2.01E-67        | 120 | ENSMUSG00000058755, ENSMUSG00000027995, ENSMUSG00000036887, ENSMUSG00000009185, ENSMUSG00000049103, ENSMUSG00000061232, ENSMUSG00000016529, ENSMUSG00000017830, ENSMUSG00000015437, ENSMUSG00000053977,                                                                                                                                                                                                                                                                                                                                                                                                                                                                                                                    | 1 | 9 | ENSMUSG00000025889, ENSMUSG00000061780, ENSMUSG00000043496, ENSMUSG00000017697, ENSMUSG00000036867, ENSMUSG00000046834, ENSMUSG00000059327, ENSMUSG00000026874, ENSMUSG00000039004 |



|  |  |  |                                                                                                                                                                                                                                                                                                                                                                                                                                                                                                                                                                                                                                                                                                                                                                                                                                                                                                                                                                                                                                                                                                                                                           |  |  |  |
|--|--|--|-----------------------------------------------------------------------------------------------------------------------------------------------------------------------------------------------------------------------------------------------------------------------------------------------------------------------------------------------------------------------------------------------------------------------------------------------------------------------------------------------------------------------------------------------------------------------------------------------------------------------------------------------------------------------------------------------------------------------------------------------------------------------------------------------------------------------------------------------------------------------------------------------------------------------------------------------------------------------------------------------------------------------------------------------------------------------------------------------------------------------------------------------------------|--|--|--|
|  |  |  | ENSMUSG00000060550, ENSMUSG00000075404,<br>ENSMUSG00000030148, ENSMUSG00000018930,<br>ENSMUSG00000000817, ENSMUSG00000078452,<br>ENSMUSG00000070034, ENSMUSG00000040253,<br>ENSMUSG00000022504, ENSMUSG00000023341,<br>ENSMUSG00000040296, ENSMUSG00000026222,<br>ENSMUSG00000025804, ENSMUSG00000034652,<br>ENSMUSG00000040264, ENSMUSG00000030144,<br>ENSMUSG00000046718, ENSMUSG00000051498,<br>ENSMUSG00000054072, ENSMUSG00000034855,<br>ENSMUSG00000026770, ENSMUSG00000030142,<br>ENSMUSG0000005696, ENSMUSG00000044701,<br>ENSMUSG00000039236, ENSMUSG00000018920,<br>ENSMUSG00000069874, ENSMUSG00000045322,<br>ENSMUSG00000030954, ENSMUSG00000026068,<br>ENSMUSG00000025492, ENSMUSG00000079362,<br>ENSMUSG00000070427, ENSMUSG00000055994,<br>ENSMUSG00000040751, ENSMUSG00000040552,<br>ENSMUSG00000028270, ENSMUSG00000040627,<br>ENSMUSG00000035373, ENSMUSG00000024371,<br>ENSMUSG00000026896, ENSMUSG00000000982,<br>ENSMUSG00000038067, ENSMUSG00000055172,<br>ENSMUSG00000053175, ENSMUSG00000025498,<br>ENSMUSG00000026656, ENSMUSG00000003283,<br>ENSMUSG00000028268, ENSMUSG00000048806,<br>ENSMUSG00000058818, ENSMUSG00000000386, |  |  |  |
|--|--|--|-----------------------------------------------------------------------------------------------------------------------------------------------------------------------------------------------------------------------------------------------------------------------------------------------------------------------------------------------------------------------------------------------------------------------------------------------------------------------------------------------------------------------------------------------------------------------------------------------------------------------------------------------------------------------------------------------------------------------------------------------------------------------------------------------------------------------------------------------------------------------------------------------------------------------------------------------------------------------------------------------------------------------------------------------------------------------------------------------------------------------------------------------------------|--|--|--|

|  |  |  |                                                                                                                                                                                                                                                                                                                                                                                                                                                                                                                                                                                                                                                                                                                                                                                                                                                                                                                                                                                                                                                                                                                                                           |  |  |  |
|--|--|--|-----------------------------------------------------------------------------------------------------------------------------------------------------------------------------------------------------------------------------------------------------------------------------------------------------------------------------------------------------------------------------------------------------------------------------------------------------------------------------------------------------------------------------------------------------------------------------------------------------------------------------------------------------------------------------------------------------------------------------------------------------------------------------------------------------------------------------------------------------------------------------------------------------------------------------------------------------------------------------------------------------------------------------------------------------------------------------------------------------------------------------------------------------------|--|--|--|
|  |  |  | ENSMUSG00000044583, ENSMUSG00000029380,<br>ENSMUSG00000074151, ENSMUSG00000040528,<br>ENSMUSG00000036905, ENSMUSG00000035352,<br>ENSMUSG00000026822, ENSMUSG00000058427,<br>ENSMUSG00000029379, ENSMUSG00000035673,<br>ENSMUSG00000029298, ENSMUSG00000051439,<br>ENSMUSG00000037202, ENSMUSG00000035385,<br>ENSMUSG00000073411, ENSMUSG00000026166,<br>ENSMUSG00000030413, ENSMUSG00000028874,<br>ENSMUSG00000029915, ENSMUSG00000026011,<br>ENSMUSG00000027398, ENSMUSG00000027639,<br>ENSMUSG00000027514, ENSMUSG00000034459,<br>ENSMUSG00000028362, ENSMUSG00000036469,<br>ENSMUSG00000067212, ENSMUSG00000021423,<br>ENSMUSG00000055170, ENSMUSG00000028269,<br>ENSMUSG00000079363, ENSMUSG00000026104,<br>ENSMUSG00000092005, ENSMUSG00000035042,<br>ENSMUSG00000039748, ENSMUSG00000058715,<br>ENSMUSG00000024349, ENSMUSG00000026573,<br>ENSMUSG0000004296, ENSMUSG00000076612,<br>ENSMUSG00000000791, ENSMUSG00000015947,<br>ENSMUSG00000021624, ENSMUSG00000023078,<br>ENSMUSG00000041515, ENSMUSG00000044827,<br>ENSMUSG00000037440, ENSMUSG00000034394,<br>ENSMUSG00000046879, ENSMUSG00000034116,<br>ENSMUSG00000024401, ENSMUSG00000090231, |  |  |  |
|--|--|--|-----------------------------------------------------------------------------------------------------------------------------------------------------------------------------------------------------------------------------------------------------------------------------------------------------------------------------------------------------------------------------------------------------------------------------------------------------------------------------------------------------------------------------------------------------------------------------------------------------------------------------------------------------------------------------------------------------------------------------------------------------------------------------------------------------------------------------------------------------------------------------------------------------------------------------------------------------------------------------------------------------------------------------------------------------------------------------------------------------------------------------------------------------------|--|--|--|

|            |                       |          |    |                                                                                                                                                                                                                                                                                                                                                                                                                                            |          |    |                                                                                                                                                                                                                                                                                                                                                                                                                                                                                                                                                                            |
|------------|-----------------------|----------|----|--------------------------------------------------------------------------------------------------------------------------------------------------------------------------------------------------------------------------------------------------------------------------------------------------------------------------------------------------------------------------------------------------------------------------------------------|----------|----|----------------------------------------------------------------------------------------------------------------------------------------------------------------------------------------------------------------------------------------------------------------------------------------------------------------------------------------------------------------------------------------------------------------------------------------------------------------------------------------------------------------------------------------------------------------------------|
|            |                       |          |    | ENSMUSG00000034438, ENSMUSG00000054588,<br>ENSMUSG00000025746, ENSMUSG00000039146,<br>ENSMUSG00000026177, ENSMUSG00000033777                                                                                                                                                                                                                                                                                                               |          |    |                                                                                                                                                                                                                                                                                                                                                                                                                                                                                                                                                                            |
| GO:0003012 | muscle system process | 1        | 0  |                                                                                                                                                                                                                                                                                                                                                                                                                                            | 2.28E-09 | 26 | ENSMUSG00000009471, ENSMUSG00000030730,<br>ENSMUSG00000064179, ENSMUSG00000035458,<br>ENSMUSG00000032366, ENSMUSG00000027470,<br>ENSMUSG00000033196, ENSMUSG00000057003,<br>ENSMUSG00000091898, ENSMUSG00000053093,<br>ENSMUSG00000021909, ENSMUSG00000006457,<br>ENSMUSG00000017300, ENSMUSG00000061816,<br>ENSMUSG00000061723, ENSMUSG00000031097,<br>ENSMUSG00000061086, ENSMUSG00000020216,<br>ENSMUSG00000020623, ENSMUSG00000020061,<br>ENSMUSG00000059741, ENSMUSG00000052374,<br>ENSMUSG00000029361, ENSMUSG00000031980,<br>ENSMUSG00000040752, ENSMUSG00000020475 |
| GO:0007067 | mitosis               | 7.66E-18 | 47 | ENSMUSG00000017716, ENSMUSG00000015880,<br>ENSMUSG00000024791, ENSMUSG00000050107,<br>ENSMUSG00000045273, ENSMUSG00000024989,<br>ENSMUSG00000068744, ENSMUSG00000019942,<br>ENSMUSG00000045328, ENSMUSG00000006398,<br>ENSMUSG00000028873, ENSMUSG00000002055,<br>ENSMUSG00000027379, ENSMUSG00000024056,<br>ENSMUSG00000027469, ENSMUSG00000027331,<br>ENSMUSG00000027715, ENSMUSG00000029414,<br>ENSMUSG00000044201, ENSMUSG00000026683, | 1        | 6  | ENSMUSG00000007815, ENSMUSG00000025862,<br>ENSMUSG00000001403, ENSMUSG00000062380,<br>ENSMUSG00000031176, ENSMUSG00000036782                                                                                                                                                                                                                                                                                                                                                                                                                                               |

|            |                                       |          |    |                                                                                                                                                                                                                                                                                                                                                                                                                                                                                                                                                                                                                  |   |    |                                                                                                                                                                                                                              |
|------------|---------------------------------------|----------|----|------------------------------------------------------------------------------------------------------------------------------------------------------------------------------------------------------------------------------------------------------------------------------------------------------------------------------------------------------------------------------------------------------------------------------------------------------------------------------------------------------------------------------------------------------------------------------------------------------------------|---|----|------------------------------------------------------------------------------------------------------------------------------------------------------------------------------------------------------------------------------|
|            |                                       |          |    | ENSMUSG00000023505, ENSMUSG000000041431,<br>ENSMUSG00000040084, ENSMUSG000000036223,<br>ENSMUSG00000027306, ENSMUSG000000023015,<br>ENSMUSG00000024795, ENSMUSG000000069910,<br>ENSMUSG00000025001, ENSMUSG000000048922,<br>ENSMUSG000000051378, ENSMUSG000000020897,<br>ENSMUSG00000017499, ENSMUSG000000071350,<br>ENSMUSG00000020415, ENSMUSG000000028678,<br>ENSMUSG00000012443, ENSMUSG000000030867,<br>ENSMUSG00000074476, ENSMUSG000000017861,<br>ENSMUSG00000023940, ENSMUSG000000072082,<br>ENSMUSG00000026779, ENSMUSG000000033952,<br>ENSMUSG000000058290, ENSMUSG000000032218,<br>ENSMUSG00000027496 |   |    |                                                                                                                                                                                                                              |
| GO:0071346 | cellular response to interferon-gamma | 2.54E-13 | 14 | ENSMUSG00000028269, ENSMUSG000000079363,<br>ENSMUSG00000026104, ENSMUSG000000079362,<br>ENSMUSG00000028268, ENSMUSG000000040253,<br>ENSMUSG00000034438, ENSMUSG000000054588,<br>ENSMUSG00000028270, ENSMUSG000000029298,<br>ENSMUSG00000040264, ENSMUSG000000035385,<br>ENSMUSG00000004296, ENSMUSG00000000791                                                                                                                                                                                                                                                                                                   | 1 | 0  |                                                                                                                                                                                                                              |
| GO:0009611 | response to wounding                  | 2.70E-16 | 63 | ENSMUSG00000036931, ENSMUSG000000027995,<br>ENSMUSG00000029664, ENSMUSG000000035352,<br>ENSMUSG00000030017, ENSMUSG000000058427,<br>ENSMUSG00000029379, ENSMUSG000000009185,<br>ENSMUSG00000031444, ENSMUSG000000049103,                                                                                                                                                                                                                                                                                                                                                                                         | 1 | 21 | ENSMUSG00000009471, ENSMUSG000000042812,<br>ENSMUSG000000022868, ENSMUSG000000033831,<br>ENSMUSG000000019326, ENSMUSG000000033196,<br>ENSMUSG000000032911, ENSMUSG000000052911,<br>ENSMUSG000000026984, ENSMUSG000000026715, |

|  |  |  |                                                                                                                                                                                                                                                                                                                                                                                                                                                                                                                                                                                                                                                                                                                                                                                                                                                                                                                                                                                                                                                                                                                                                           |  |                                                                                                                                                                                                                                           |
|--|--|--|-----------------------------------------------------------------------------------------------------------------------------------------------------------------------------------------------------------------------------------------------------------------------------------------------------------------------------------------------------------------------------------------------------------------------------------------------------------------------------------------------------------------------------------------------------------------------------------------------------------------------------------------------------------------------------------------------------------------------------------------------------------------------------------------------------------------------------------------------------------------------------------------------------------------------------------------------------------------------------------------------------------------------------------------------------------------------------------------------------------------------------------------------------------|--|-------------------------------------------------------------------------------------------------------------------------------------------------------------------------------------------------------------------------------------------|
|  |  |  | ENSMUSG00000051439, ENSMUSG00000074115,<br>ENSMUSG00000016529, ENSMUSG00000037731,<br>ENSMUSG00000035385, ENSMUSG00000032691,<br>ENSMUSG00000040017, ENSMUSG00000026166,<br>ENSMUSG00000018930, ENSMUSG00000025804,<br>ENSMUSG00000034652, ENSMUSG00000020053,<br>ENSMUSG00000022534, ENSMUSG00000027398,<br>ENSMUSG00000051498, ENSMUSG00000034855,<br>ENSMUSG00000031551, ENSMUSG00000026770,<br>ENSMUSG00000025473, ENSMUSG00000044701,<br>ENSMUSG00000021423, ENSMUSG00000045322,<br>ENSMUSG00000055994, ENSMUSG00000035042,<br>ENSMUSG00000056529, ENSMUSG00000058715,<br>ENSMUSG00000035373, ENSMUSG00000000982,<br>ENSMUSG00000057465, ENSMUSG00000026981,<br>ENSMUSG00000050896, ENSMUSG00000015947,<br>ENSMUSG00000021624, ENSMUSG00000040026,<br>ENSMUSG00000023913, ENSMUSG00000029371,<br>ENSMUSG00000023078, ENSMUSG00000029075,<br>ENSMUSG00000030793, ENSMUSG00000044827,<br>ENSMUSG0000003283, ENSMUSG00000037440,<br>ENSMUSG00000026582, ENSMUSG00000024529,<br>ENSMUSG00000024401, ENSMUSG00000026580,<br>ENSMUSG00000044583, ENSMUSG00000025746,<br>ENSMUSG00000029380, ENSMUSG00000041347,<br>ENSMUSG00000026177, ENSMUSG00000033777, |  | ENSMUSG00000037188, ENSMUSG00000026874,<br>ENSMUSG00000000049, ENSMUSG00000033350,<br>ENSMUSG00000022040, ENSMUSG00000022996,<br>ENSMUSG00000043496, ENSMUSG00000010051,<br>ENSMUSG00000062778, ENSMUSG00000059481,<br>ENSMUSG00000024386 |
|--|--|--|-----------------------------------------------------------------------------------------------------------------------------------------------------------------------------------------------------------------------------------------------------------------------------------------------------------------------------------------------------------------------------------------------------------------------------------------------------------------------------------------------------------------------------------------------------------------------------------------------------------------------------------------------------------------------------------------------------------------------------------------------------------------------------------------------------------------------------------------------------------------------------------------------------------------------------------------------------------------------------------------------------------------------------------------------------------------------------------------------------------------------------------------------------------|--|-------------------------------------------------------------------------------------------------------------------------------------------------------------------------------------------------------------------------------------------|

|            |                                                           |                 |    |                                                                                                                                                                                                                                                                                                                                 |   |   |                                                            |
|------------|-----------------------------------------------------------|-----------------|----|---------------------------------------------------------------------------------------------------------------------------------------------------------------------------------------------------------------------------------------------------------------------------------------------------------------------------------|---|---|------------------------------------------------------------|
|            |                                                           |                 |    | ENSMUSG00000037872                                                                                                                                                                                                                                                                                                              |   |   |                                                            |
| GO:0019883 | antigen processing and presentation of endogenous antigen | 0.00907611      | 5  | ENSMUSG00000073411, ENSMUSG00000024339, ENSMUSG00000061232, ENSMUSG00000037321, ENSMUSG00000067212                                                                                                                                                                                                                              | 1 | 0 |                                                            |
| GO:0042306 | regulation of protein import into nucleus                 | 0.00371568<br>2 | 16 | ENSMUSG00000027995, ENSMUSG00000045322, ENSMUSG00000022548, ENSMUSG00000071005, ENSMUSG00000027699, ENSMUSG00000024349, ENSMUSG00000037313, ENSMUSG00000032691, ENSMUSG00000019942, ENSMUSG00000024401, ENSMUSG00000040296, ENSMUSG00000025746, ENSMUSG00000044583, ENSMUSG00000020053, ENSMUSG00000027398, ENSMUSG00000078817  | 1 | 3 | ENSMUSG00000059201, ENSMUSG00000059327, ENSMUSG00000010047 |
| GO:0032642 | regulation of chemokine production                        | 0.00249462<br>9 | 11 | ENSMUSG00000055170, ENSMUSG00000027995, ENSMUSG00000045322, ENSMUSG00000029371, ENSMUSG00000035042, ENSMUSG00000022548, ENSMUSG00000024401, ENSMUSG00000044583, ENSMUSG00000025746, ENSMUSG00000027398, ENSMUSG00000037872                                                                                                      | 1 | 3 | ENSMUSG00000026874, ENSMUSG00000022878, ENSMUSG00000062778 |
| GO:0002819 | regulation of adaptive immune response                    | 3.45E-09        | 23 | ENSMUSG00000044701, ENSMUSG00000055170, ENSMUSG00000060802, ENSMUSG00000001444, ENSMUSG00000055994, ENSMUSG00000058715, ENSMUSG00000026573, ENSMUSG00000049103, ENSMUSG00000061232, ENSMUSG00000004296, ENSMUSG00000000791, ENSMUSG00000015947, ENSMUSG00000073411, ENSMUSG00000026656, ENSMUSG00000079620, ENSMUSG00000024401, | 1 | 2 | ENSMUSG00000090877, ENSMUSG00000017697                     |

|            |                                        |          |    |                                                                                                                                                                                                                                                                                                                                                                                                                                                                                                                                 |   |   |                                                                                   |
|------------|----------------------------------------|----------|----|---------------------------------------------------------------------------------------------------------------------------------------------------------------------------------------------------------------------------------------------------------------------------------------------------------------------------------------------------------------------------------------------------------------------------------------------------------------------------------------------------------------------------------|---|---|-----------------------------------------------------------------------------------|
|            |                                        |          |    | ENSMUSG00000022876, ENSMUSG00000024339,<br>ENSMUSG00000048806, ENSMUSG00000030895,<br>ENSMUSG00000037321, ENSMUSG00000026177,<br>ENSMUSG00000067212                                                                                                                                                                                                                                                                                                                                                                             |   |   |                                                                                   |
| GO:0070663 | regulation of leukocyte proliferation  | 5.37E-06 | 24 | ENSMUSG00000016496, ENSMUSG00000044701,<br>ENSMUSG00000055170, ENSMUSG00000073412,<br>ENSMUSG00000027843, ENSMUSG00000035042,<br>ENSMUSG00000026573, ENSMUSG00000049103,<br>ENSMUSG00000016529, ENSMUSG00000004296,<br>ENSMUSG00000000791, ENSMUSG00000022901,<br>ENSMUSG00000026656, ENSMUSG00000029075,<br>ENSMUSG00000075122, ENSMUSG00000016498,<br>ENSMUSG00000030365, ENSMUSG00000026011,<br>ENSMUSG00000024397, ENSMUSG00000025746,<br>ENSMUSG00000020053, ENSMUSG00000027398,<br>ENSMUSG00000031551, ENSMUSG00000026770 | 1 | 4 | ENSMUSG00000063632, ENSMUSG00000024653,<br>ENSMUSG00000026532, ENSMUSG00000017697 |
| GO:0050777 | negative regulation of immune response | 8.75E-10 | 19 | ENSMUSG00000055994, ENSMUSG00000026573,<br>ENSMUSG00000049103, ENSMUSG00000016529,<br>ENSMUSG00000073406, ENSMUSG00000004296,<br>ENSMUSG00000026656, ENSMUSG00000050241,<br>ENSMUSG00000079620, ENSMUSG00000079298,<br>ENSMUSG00000026011, ENSMUSG00000022876,<br>ENSMUSG00000024339, ENSMUSG00000048806,<br>ENSMUSG00000025804, ENSMUSG00000042726,<br>ENSMUSG00000030111, ENSMUSG00000037321,<br>ENSMUSG00000026770                                                                                                           | 1 | 0 |                                                                                   |

|            |                                             |                 |    |                                                                                                                                                                                                                                                                                                                                                                                                                 |             |    |                                                                                                                                                                                                                                                                                                                                                                      |
|------------|---------------------------------------------|-----------------|----|-----------------------------------------------------------------------------------------------------------------------------------------------------------------------------------------------------------------------------------------------------------------------------------------------------------------------------------------------------------------------------------------------------------------|-------------|----|----------------------------------------------------------------------------------------------------------------------------------------------------------------------------------------------------------------------------------------------------------------------------------------------------------------------------------------------------------------------|
| GO:0007156 | homophilic cell adhesion                    | 1               | 0  |                                                                                                                                                                                                                                                                                                                                                                                                                 | 0.005362275 | 13 | ENSMUSG00000032452, ENSMUSG00000069441, ENSMUSG00000001946, ENSMUSG00000056632, ENSMUSG00000074505, ENSMUSG00000008153, ENSMUSG00000031881, ENSMUSG00000061928, ENSMUSG00000031841, ENSMUSG00000059898, ENSMUSG00000044322, ENSMUSG00000034774, ENSMUSG00000032076                                                                                                   |
| GO:0002695 | negative regulation of leukocyte activation | 6.99E-05        | 18 | ENSMUSG00000016496, ENSMUSG00000036931, ENSMUSG00000040528, ENSMUSG00000073412, ENSMUSG00000027843, ENSMUSG00000071552, ENSMUSG00000026573, ENSMUSG00000049103, ENSMUSG00000016529, ENSMUSG00000026656, ENSMUSG00000030124, ENSMUSG00000016498, ENSMUSG00000022876, ENSMUSG00000026011, ENSMUSG00000048806, ENSMUSG00000034652, ENSMUSG00000031551, ENSMUSG00000026770                                          | 1           | 4  | ENSMUSG00000063632, ENSMUSG00000042812, ENSMUSG00000024653, ENSMUSG00000024028                                                                                                                                                                                                                                                                                       |
| GO:0051726 | regulation of cell cycle                    | 0.00750750<br>6 | 44 | ENSMUSG00000017716, ENSMUSG00000058755, ENSMUSG00000024791, ENSMUSG00000027699, ENSMUSG00000029377, ENSMUSG00000026605, ENSMUSG00000068744, ENSMUSG00000019942, ENSMUSG00000045328, ENSMUSG00000030268, ENSMUSG00000017146, ENSMUSG00000027379, ENSMUSG00000027469, ENSMUSG00000020053, ENSMUSG00000027398, ENSMUSG00000037628, ENSMUSG00000027715, ENSMUSG00000041324, ENSMUSG00000042489, ENSMUSG00000029414, | 1           | 18 | ENSMUSG00000027470, ENSMUSG0000005373, ENSMUSG00000035486, ENSMUSG00000066357, ENSMUSG0000007815, ENSMUSG00000044820, ENSMUSG00000032010, ENSMUSG00000032315, ENSMUSG00000042750, ENSMUSG00000022996, ENSMUSG00000010051, ENSMUSG00000031176, ENSMUSG00000036867, ENSMUSG00000042903, ENSMUSG00000025862, ENSMUSG00000001403, ENSMUSG00000023092, ENSMUSG00000046240 |



|            |                                                     |          |    |                                                                                                                                                                                                                                                                                                                                                                                                                                                                                               |             |    |                                                                                                                                                                                                         |
|------------|-----------------------------------------------------|----------|----|-----------------------------------------------------------------------------------------------------------------------------------------------------------------------------------------------------------------------------------------------------------------------------------------------------------------------------------------------------------------------------------------------------------------------------------------------------------------------------------------------|-------------|----|---------------------------------------------------------------------------------------------------------------------------------------------------------------------------------------------------------|
|            |                                                     |          |    | ENSMUSG00000024014, ENSMUSG00000055170, ENSMUSG00000035455, ENSMUSG00000035186, ENSMUSG00000070691, ENSMUSG00000041431, ENSMUSG00000027306, ENSMUSG00000037313, ENSMUSG00000004296, ENSMUSG00000023015, ENSMUSG00000037474, ENSMUSG00000078763, ENSMUSG0000002068, ENSMUSG00000020897, ENSMUSG00000017499, ENSMUSG00000034394, ENSMUSG00000039981, ENSMUSG00000030867, ENSMUSG00000036986, ENSMUSG00000024401, ENSMUSG00000024397, ENSMUSG00000072082, ENSMUSG00000026779, ENSMUSG00000032218 |             |    |                                                                                                                                                                                                         |
| GO:0002708 | positive regulation of lymphocyte mediated immunity | 2.37E-08 | 17 | ENSMUSG0000005696, ENSMUSG00000060802, ENSMUSG00000055994, ENSMUSG00000058715, ENSMUSG00000030149, ENSMUSG00000026573, ENSMUSG00000061232, ENSMUSG00000004296, ENSMUSG00000015947, ENSMUSG00000073411, ENSMUSG00000050241, ENSMUSG00000030124, ENSMUSG00000024401, ENSMUSG00000024339, ENSMUSG00000030895, ENSMUSG00000037321, ENSMUSG00000067212                                                                                                                                             | 1           | 2  | ENSMUSG00000090877, ENSMUSG00000032076                                                                                                                                                                  |
| GO:0006629 | lipid metabolic process                             | 1        | 20 | ENSMUSG00000024112, ENSMUSG00000003484, ENSMUSG00000002847, ENSMUSG00000002992, ENSMUSG00000022548, ENSMUSG00000003555, ENSMUSG00000018907, ENSMUSG00000021322, ENSMUSG00000074115, ENSMUSG00000031891,                                                                                                                                                                                                                                                                                       | 0.002968305 | 62 | ENSMUSG00000037686, ENSMUSG00000032203, ENSMUSG00000033327, ENSMUSG00000032262, ENSMUSG00000074254, ENSMUSG00000025889, ENSMUSG00000062515, ENSMUSG00000055980, ENSMUSG00000035686, ENSMUSG00000046402, |

|  |  |  |  |                                                                                                                                                                                                                    |  |  |                                                                                                                                                                                                                                                                                                                                                                                                                                                                                                                                                                                                                                                                                                                                                                                                                                                                                                                                                                                                                                                                                                                                                           |
|--|--|--|--|--------------------------------------------------------------------------------------------------------------------------------------------------------------------------------------------------------------------|--|--|-----------------------------------------------------------------------------------------------------------------------------------------------------------------------------------------------------------------------------------------------------------------------------------------------------------------------------------------------------------------------------------------------------------------------------------------------------------------------------------------------------------------------------------------------------------------------------------------------------------------------------------------------------------------------------------------------------------------------------------------------------------------------------------------------------------------------------------------------------------------------------------------------------------------------------------------------------------------------------------------------------------------------------------------------------------------------------------------------------------------------------------------------------------|
|  |  |  |  | ENSMUSG00000026981, ENSMUSG00000023913,<br>ENSMUSG00000033847, ENSMUSG00000028751,<br>ENSMUSG00000017146, ENSMUSG00000039519,<br>ENSMUSG00000050370, ENSMUSG00000000182,<br>ENSMUSG00000052160, ENSMUSG00000023045 |  |  | ENSMUSG00000002588, ENSMUSG00000031844,<br>ENSMUSG00000013418, ENSMUSG00000032454,<br>ENSMUSG00000032310, ENSMUSG00000031996,<br>ENSMUSG00000027513, ENSMUSG00000022996,<br>ENSMUSG00000032807, ENSMUSG00000031760,<br>ENSMUSG00000067653, ENSMUSG00000037071,<br>ENSMUSG00000028773, ENSMUSG00000032649,<br>ENSMUSG00000025202, ENSMUSG00000025153,<br>ENSMUSG00000008035, ENSMUSG00000073424,<br>ENSMUSG00000022878, ENSMUSG00000078597,<br>ENSMUSG00000024526, ENSMUSG00000030546,<br>ENSMUSG00000032349, ENSMUSG00000059201,<br>ENSMUSG00000019359, ENSMUSG00000066072,<br>ENSMUSG00000023019, ENSMUSG00000004885,<br>ENSMUSG00000032558, ENSMUSG00000030972,<br>ENSMUSG00000032908, ENSMUSG00000025991,<br>ENSMUSG00000056078, ENSMUSG00000032315,<br>ENSMUSG00000000049, ENSMUSG00000090150,<br>ENSMUSG00000022040, ENSMUSG00000052131,<br>ENSMUSG00000024990, ENSMUSG00000032081,<br>ENSMUSG00000035540, ENSMUSG00000032083,<br>ENSMUSG00000030747, ENSMUSG00000075217,<br>ENSMUSG00000028167, ENSMUSG00000031425,<br>ENSMUSG00000041220, ENSMUSG00000020532,<br>ENSMUSG00000050195, ENSMUSG00000041653,<br>ENSMUSG00000027380, ENSMUSG00000012187 |
|--|--|--|--|--------------------------------------------------------------------------------------------------------------------------------------------------------------------------------------------------------------------|--|--|-----------------------------------------------------------------------------------------------------------------------------------------------------------------------------------------------------------------------------------------------------------------------------------------------------------------------------------------------------------------------------------------------------------------------------------------------------------------------------------------------------------------------------------------------------------------------------------------------------------------------------------------------------------------------------------------------------------------------------------------------------------------------------------------------------------------------------------------------------------------------------------------------------------------------------------------------------------------------------------------------------------------------------------------------------------------------------------------------------------------------------------------------------------|

|            |                                             |          |    |                                                                                                                                                                                                                                                                                                                                                                                            |   |    |                                                                                                                                                                                                                                                |
|------------|---------------------------------------------|----------|----|--------------------------------------------------------------------------------------------------------------------------------------------------------------------------------------------------------------------------------------------------------------------------------------------------------------------------------------------------------------------------------------------|---|----|------------------------------------------------------------------------------------------------------------------------------------------------------------------------------------------------------------------------------------------------|
| GO:0001562 | response to protozoan                       | 1.26E-14 | 15 | ENSMUSG00000055170, ENSMUSG00000028269, ENSMUSG00000069874, ENSMUSG00000041515, ENSMUSG00000079362, ENSMUSG00000028268, ENSMUSG00000040253, ENSMUSG00000054588, ENSMUSG00000028270, ENSMUSG00000025746, ENSMUSG00000029298, ENSMUSG00000054072, ENSMUSG0000004296, ENSMUSG00000053175, ENSMUSG00000026177                                                                                  | 1 | 0  |                                                                                                                                                                                                                                                |
| GO:0042035 | regulation of cytokine biosynthetic process | 9.23E-07 | 19 | ENSMUSG00000044701, ENSMUSG00000055170, ENSMUSG00000028602, ENSMUSG00000027995, ENSMUSG00000045322, ENSMUSG00000029377, ENSMUSG00000049103, ENSMUSG00000018899, ENSMUSG00000016529, ENSMUSG00000053175, ENSMUSG00000044827, ENSMUSG00000030124, ENSMUSG00000030365, ENSMUSG00000024401, ENSMUSG00000025746, ENSMUSG00000044583, ENSMUSG00000051498, ENSMUSG00000027398, ENSMUSG00000078817 | 1 | 0  |                                                                                                                                                                                                                                                |
| GO:0034097 | response to cytokine stimulus               | 4.65E-32 | 67 | ENSMUSG00000066363, ENSMUSG00000041481, ENSMUSG00000066861, ENSMUSG00000049103, ENSMUSG00000018899, ENSMUSG00000078853, ENSMUSG00000026073, ENSMUSG00000075404, ENSMUSG00000054203, ENSMUSG00000058207, ENSMUSG00000040253, ENSMUSG00000022504, ENSMUSG00000026222, ENSMUSG00000025804, ENSMUSG00000040264, ENSMUSG00000045932,                                                            | 1 | 12 | ENSMUSG00000031134, ENSMUSG00000042812, ENSMUSG00000059201, ENSMUSG00000031760, ENSMUSG00000025889, ENSMUSG00000024653, ENSMUSG00000010051, ENSMUSG00000006235, ENSMUSG00000024028, ENSMUSG00000022878, ENSMUSG00000027820, ENSMUSG00000010047 |

|  |  |  |  |                                                                                                                                                                                                                                                                                                                                                                                                                                                                                                                                                                                                                                                                                                                                                                                                                                                                                                                                                                                                                                                                                                                                      |  |  |  |
|--|--|--|--|--------------------------------------------------------------------------------------------------------------------------------------------------------------------------------------------------------------------------------------------------------------------------------------------------------------------------------------------------------------------------------------------------------------------------------------------------------------------------------------------------------------------------------------------------------------------------------------------------------------------------------------------------------------------------------------------------------------------------------------------------------------------------------------------------------------------------------------------------------------------------------------------------------------------------------------------------------------------------------------------------------------------------------------------------------------------------------------------------------------------------------------|--|--|--|
|  |  |  |  | ENSMUSG00000021091, ENSMUSG00000054072,<br>ENSMUSG00000026770, ENSMUSG00000038037,<br>ENSMUSG00000018920, ENSMUSG00000069874,<br>ENSMUSG00000026068, ENSMUSG00000025492,<br>ENSMUSG00000079362, ENSMUSG00000028270,<br>ENSMUSG00000030793, ENSMUSG00000026582,<br>ENSMUSG00000028268, ENSMUSG00000038418,<br>ENSMUSG00000058818, ENSMUSG00000079014,<br>ENSMUSG00000078922, ENSMUSG00000029377,<br>ENSMUSG00000029298, ENSMUSG00000043263,<br>ENSMUSG00000035385, ENSMUSG00000037860,<br>ENSMUSG00000073489, ENSMUSG00000039997,<br>ENSMUSG00000026535, ENSMUSG00000027398,<br>ENSMUSG00000034459, ENSMUSG00000055170,<br>ENSMUSG00000068227, ENSMUSG00000079363,<br>ENSMUSG00000028269, ENSMUSG00000026104,<br>ENSMUSG00000035042, ENSMUSG00000071714,<br>ENSMUSG00000026573, ENSMUSG0000004296,<br>ENSMUSG00000000791, ENSMUSG00000049734,<br>ENSMUSG00000023078, ENSMUSG00000073555,<br>ENSMUSG00000074896, ENSMUSG00000036986,<br>ENSMUSG00000079012, ENSMUSG00000024401,<br>ENSMUSG00000034438, ENSMUSG00000026580,<br>ENSMUSG00000054588, ENSMUSG00000025746,<br>ENSMUSG00000066361, ENSMUSG00000071713,<br>ENSMUSG00000026177 |  |  |  |
|--|--|--|--|--------------------------------------------------------------------------------------------------------------------------------------------------------------------------------------------------------------------------------------------------------------------------------------------------------------------------------------------------------------------------------------------------------------------------------------------------------------------------------------------------------------------------------------------------------------------------------------------------------------------------------------------------------------------------------------------------------------------------------------------------------------------------------------------------------------------------------------------------------------------------------------------------------------------------------------------------------------------------------------------------------------------------------------------------------------------------------------------------------------------------------------|--|--|--|

|            |                                                                   |                 |    |                                                                                                                                                                                                                                                                                                                                                                                                                                                                                                                                                                                                                                                                                                                                                |   |   |                                                                                |
|------------|-------------------------------------------------------------------|-----------------|----|------------------------------------------------------------------------------------------------------------------------------------------------------------------------------------------------------------------------------------------------------------------------------------------------------------------------------------------------------------------------------------------------------------------------------------------------------------------------------------------------------------------------------------------------------------------------------------------------------------------------------------------------------------------------------------------------------------------------------------------------|---|---|--------------------------------------------------------------------------------|
| GO:0002237 | response to molecule of bacterial origin                          | 3.60E-16        | 36 | ENSMUSG00000024079, ENSMUSG00000060802, ENSMUSG00000027995, ENSMUSG00000058427, ENSMUSG00000051439, ENSMUSG00000016529, ENSMUSG00000035385, ENSMUSG00000020638, ENSMUSG00000025804, ENSMUSG00000051498, ENSMUSG00000027398, ENSMUSG00000059089, ENSMUSG00000079227, ENSMUSG00000031551, ENSMUSG00000055170, ENSMUSG00000045322, ENSMUSG00000026104, ENSMUSG00000079362, ENSMUSG00000055994, ENSMUSG00000035042, ENSMUSG00000056529, ENSMUSG00000030149, ENSMUSG00000028270, ENSMUSG00000000982, ENSMUSG00000004296, ENSMUSG00000026656, ENSMUSG00000044827, ENSMUSG00000041515, ENSMUSG00000029371, ENSMUSG00000024401, ENSMUSG00000024339, ENSMUSG00000054588, ENSMUSG00000041347, ENSMUSG00000022126, ENSMUSG00000026177, ENSMUSG00000053219 | 1 | 4 | ENSMUSG00000020889, ENSMUSG00000025991, ENSMUSG00000025889, ENSMUSG00000028036 |
| GO:0002700 | regulation of production of molecular mediator of immune response | 0.00013945<br>4 | 14 | ENSMUSG00000026656, ENSMUSG00000055170, ENSMUSG00000027995, ENSMUSG00000029075, ENSMUSG0000001444, ENSMUSG00000055994, ENSMUSG00000024353, ENSMUSG00000024401, ENSMUSG00000058715, ENSMUSG00000026573, ENSMUSG00000048806, ENSMUSG00000025746, ENSMUSG00000030895, ENSMUSG00000016529                                                                                                                                                                                                                                                                                                                                                                                                                                                          | 1 | 3 | ENSMUSG00000024990, ENSMUSG00000043496, ENSMUSG00000032083                     |
| GO:0002764 | immune response-regulating                                        | 0.00011327      | 18 | ENSMUSG00000074148, ENSMUSG00000027995,                                                                                                                                                                                                                                                                                                                                                                                                                                                                                                                                                                                                                                                                                                        | 1 | 0 |                                                                                |

|            |                           |          |    |                                                                                                                                                                                                                                                                                                                                |   |   |  |
|------------|---------------------------|----------|----|--------------------------------------------------------------------------------------------------------------------------------------------------------------------------------------------------------------------------------------------------------------------------------------------------------------------------------|---|---|--|
|            | signaling pathway         | 7        |    | ENSMUSG00000045322, ENSMUSG00000027843, ENSMUSG00000055994, ENSMUSG00000040751, ENSMUSG00000058715, ENSMUSG00000030149, ENSMUSG00000040552, ENSMUSG00000022901, ENSMUSG00000050241, ENSMUSG00000030413, ENSMUSG00000030365, ENSMUSG00000026011, ENSMUSG00000044583, ENSMUSG00000051498, ENSMUSG00000049109, ENSMUSG00000025473 |   |   |  |
| GO:0072676 | lymphocyte migration      | 3.38E-08 | 10 | ENSMUSG00000050232, ENSMUSG00000023078, ENSMUSG0000001444, ENSMUSG00000035042, ENSMUSG00000026573, ENSMUSG00000049103, ENSMUSG00000074115, ENSMUSG00000035385, ENSMUSG00000000982, ENSMUSG00000025473                                                                                                                          | 1 | 0 |  |
| GO:0030593 | neutrophil chemotaxis     | 9.25E-06 | 11 | ENSMUSG00000055170, ENSMUSG00000048534, ENSMUSG00000058427, ENSMUSG00000029379, ENSMUSG00000030786, ENSMUSG00000058715, ENSMUSG00000027398, ENSMUSG00000029380, ENSMUSG00000035385, ENSMUSG00000000982, ENSMUSG00000029304                                                                                                     | 1 | 0 |  |
| GO:0051607 | defense response to virus | 2.55E-13 | 20 | ENSMUSG00000055170, ENSMUSG00000040613, ENSMUSG00000045322, ENSMUSG00000025492, ENSMUSG00000029417, ENSMUSG00000024349, ENSMUSG00000066861, ENSMUSG00000037202, ENSMUSG00000004296, ENSMUSG00000053977, ENSMUSG00000032691, ENSMUSG00000020641, ENSMUSG00000022901, ENSMUSG00000032661,                                        | 1 | 0 |  |

|            |                                                          |          |    |                                                                                                                                                                                                                                                                                                           |          |    |                                                                                                                                                                                                                                                                                                                                                                                                                                                                                                                                                                                                                                                                                                             |
|------------|----------------------------------------------------------|----------|----|-----------------------------------------------------------------------------------------------------------------------------------------------------------------------------------------------------------------------------------------------------------------------------------------------------------|----------|----|-------------------------------------------------------------------------------------------------------------------------------------------------------------------------------------------------------------------------------------------------------------------------------------------------------------------------------------------------------------------------------------------------------------------------------------------------------------------------------------------------------------------------------------------------------------------------------------------------------------------------------------------------------------------------------------------------------------|
|            |                                                          |          |    | ENSMUSG00000048806, ENSMUSG00000025746,<br>ENSMUSG00000044583, ENSMUSG00000046718,<br>ENSMUSG00000027639, ENSMUSG00000034855                                                                                                                                                                              |          |    |                                                                                                                                                                                                                                                                                                                                                                                                                                                                                                                                                                                                                                                                                                             |
| GO:0007517 | muscle organ development                                 | 1        | 5  | ENSMUSG00000022587, ENSMUSG00000020053,<br>ENSMUSG00000058773, ENSMUSG00000034394,<br>ENSMUSG00000006642                                                                                                                                                                                                  | 2.35E-07 | 32 | ENSMUSG00000009471, ENSMUSG00000021506,<br>ENSMUSG00000032366, ENSMUSG00000035606,<br>ENSMUSG00000052911, ENSMUSG00000031274,<br>ENSMUSG00000046714, ENSMUSG00000030672,<br>ENSMUSG00000032010, ENSMUSG00000021909,<br>ENSMUSG00000031972, ENSMUSG00000022996,<br>ENSMUSG00000032085, ENSMUSG00000032060,<br>ENSMUSG00000026459, ENSMUSG00000049641,<br>ENSMUSG00000007877, ENSMUSG00000040289,<br>ENSMUSG00000038119, ENSMUSG00000040752,<br>ENSMUSG00000035458, ENSMUSG00000027470,<br>ENSMUSG00000027077, ENSMUSG00000032340,<br>ENSMUSG00000091898, ENSMUSG00000007815,<br>ENSMUSG00000053093, ENSMUSG00000045103,<br>ENSMUSG00000059741, ENSMUSG00000042903,<br>ENSMUSG00000006235, ENSMUSG00000026418 |
| GO:0002705 | positive regulation of<br>leukocyte mediated<br>immunity | 2.37E-08 | 17 | ENSMUSG00000005696, ENSMUSG00000060802,<br>ENSMUSG00000055994, ENSMUSG00000058715,<br>ENSMUSG00000030149, ENSMUSG00000026573,<br>ENSMUSG00000061232, ENSMUSG00000004296,<br>ENSMUSG00000015947, ENSMUSG00000073411,<br>ENSMUSG00000050241, ENSMUSG00000030124,<br>ENSMUSG00000024401, ENSMUSG00000024339, | 1        | 2  | ENSMUSG00000090877, ENSMUSG00000032076                                                                                                                                                                                                                                                                                                                                                                                                                                                                                                                                                                                                                                                                      |

|            |                       |          |    |                                                                                                                                                                                                                                                                                                                                                                                                                                                                                                                                                                                                                                                                                                                                                                                                                                                                                                                                                                                                                                                                     |   |    |                                                                                                                                                                                                                    |
|------------|-----------------------|----------|----|---------------------------------------------------------------------------------------------------------------------------------------------------------------------------------------------------------------------------------------------------------------------------------------------------------------------------------------------------------------------------------------------------------------------------------------------------------------------------------------------------------------------------------------------------------------------------------------------------------------------------------------------------------------------------------------------------------------------------------------------------------------------------------------------------------------------------------------------------------------------------------------------------------------------------------------------------------------------------------------------------------------------------------------------------------------------|---|----|--------------------------------------------------------------------------------------------------------------------------------------------------------------------------------------------------------------------|
|            |                       |          |    | ENSMUSG00000030895, ENSMUSG00000037321,<br>ENSMUSG00000067212                                                                                                                                                                                                                                                                                                                                                                                                                                                                                                                                                                                                                                                                                                                                                                                                                                                                                                                                                                                                       |   |    |                                                                                                                                                                                                                    |
| GO:0006954 | inflammatory response | 1.57E-25 | 58 | ENSMUSG00000036931, ENSMUSG00000027995,<br>ENSMUSG00000035352, ENSMUSG00000030017,<br>ENSMUSG00000058427, ENSMUSG00000029379,<br>ENSMUSG00000009185, ENSMUSG00000049103,<br>ENSMUSG00000051439, ENSMUSG00000074115,<br>ENSMUSG00000016529, ENSMUSG00000037731,<br>ENSMUSG00000035385, ENSMUSG00000032691,<br>ENSMUSG00000040017, ENSMUSG00000026166,<br>ENSMUSG00000018930, ENSMUSG00000025804,<br>ENSMUSG00000034652, ENSMUSG00000022534,<br>ENSMUSG00000027398, ENSMUSG00000051498,<br>ENSMUSG00000034855, ENSMUSG00000031551,<br>ENSMUSG00000026770, ENSMUSG00000025473,<br>ENSMUSG00000044701, ENSMUSG00000021423,<br>ENSMUSG00000045322, ENSMUSG00000055994,<br>ENSMUSG00000035042, ENSMUSG00000056529,<br>ENSMUSG00000058715, ENSMUSG00000035373,<br>ENSMUSG00000000982, ENSMUSG00000057465,<br>ENSMUSG00000026981, ENSMUSG00000015947,<br>ENSMUSG00000021624, ENSMUSG00000040026,<br>ENSMUSG00000023913, ENSMUSG00000029371,<br>ENSMUSG00000023078, ENSMUSG00000029075,<br>ENSMUSG00000030793, ENSMUSG00000044827,<br>ENSMUSG0000003283, ENSMUSG00000037440, | 1 | 10 | ENSMUSG00000022040, ENSMUSG00000022868,<br>ENSMUSG00000019326, ENSMUSG00000043496,<br>ENSMUSG00000010051, ENSMUSG00000032911,<br>ENSMUSG00000026984, ENSMUSG00000062778,<br>ENSMUSG00000026874, ENSMUSG00000033350 |



|            |                                                            |                 |     |                                                                                                                                                                                                                                                                                                                                                      |   |    |                                                                                                                                                                                                                                                                                                                                                      |
|------------|------------------------------------------------------------|-----------------|-----|------------------------------------------------------------------------------------------------------------------------------------------------------------------------------------------------------------------------------------------------------------------------------------------------------------------------------------------------------|---|----|------------------------------------------------------------------------------------------------------------------------------------------------------------------------------------------------------------------------------------------------------------------------------------------------------------------------------------------------------|
|            |                                                            |                 |     | ENSMUSG00000026582, ENSMUSG00000024401,<br>ENSMUSG00000026580, ENSMUSG00000044583,<br>ENSMUSG00000025746, ENSMUSG00000029380,<br>ENSMUSG00000041347, ENSMUSG00000026177,<br>ENSMUSG00000033777, ENSMUSG00000037872                                                                                                                                   |   |    |                                                                                                                                                                                                                                                                                                                                                      |
| GO:1900180 | regulation of protein<br>localization to nucleus           | 0.00371568<br>2 | 16  | ENSMUSG00000027995, ENSMUSG00000045322,<br>ENSMUSG00000022548, ENSMUSG00000071005,<br>ENSMUSG00000027699, ENSMUSG00000024349,<br>ENSMUSG00000037313, ENSMUSG00000032691,<br>ENSMUSG00000019942, ENSMUSG00000024401,<br>ENSMUSG00000040296, ENSMUSG00000025746,<br>ENSMUSG00000044583, ENSMUSG00000020053,<br>ENSMUSG00000027398, ENSMUSG00000078817  | 1 | 3  | ENSMUSG00000059201, ENSMUSG00000059327,<br>ENSMUSG00000010047                                                                                                                                                                                                                                                                                        |
| GO:0042269 | regulation of natural killer<br>cell mediated cytotoxicity | 0.00042102<br>9 | 9   | ENSMUSG00000005696, ENSMUSG00000050241,<br>ENSMUSG00000030124, ENSMUSG00000079298,<br>ENSMUSG00000030149, ENSMUSG00000024339,<br>ENSMUSG00000073406, ENSMUSG00000037321,<br>ENSMUSG00000004296                                                                                                                                                       | 1 | 0  |                                                                                                                                                                                                                                                                                                                                                      |
| GO:0006952 | defense response                                           | 3.75E-60        | 129 | ENSMUSG00000036931, ENSMUSG00000027995,<br>ENSMUSG00000066861, ENSMUSG00000049103,<br>ENSMUSG00000061232, ENSMUSG00000017830,<br>ENSMUSG00000053977, ENSMUSG00000075404,<br>ENSMUSG00000022504, ENSMUSG00000040296,<br>ENSMUSG00000040264, ENSMUSG00000030144,<br>ENSMUSG00000037321, ENSMUSG00000031551,<br>ENSMUSG00000025473, ENSMUSG00000069874, | 1 | 25 | ENSMUSG00000031495, ENSMUSG00000022868,<br>ENSMUSG00000025889, ENSMUSG00000019326,<br>ENSMUSG00000061780, ENSMUSG00000034783,<br>ENSMUSG00000032911, ENSMUSG00000026984,<br>ENSMUSG00000035486, ENSMUSG00000059230,<br>ENSMUSG00000090877, ENSMUSG00000036216,<br>ENSMUSG00000035459, ENSMUSG00000026874,<br>ENSMUSG00000033350, ENSMUSG00000021055, |

|  |  |  |                                                                                                                                                                                                                                                                                                                                                                                                                                                                                                                                                                                                                                                                                                                                                                                                                                                                                                                                                                                                                                                                                                                                                           |  |  |                                                                                                                                                                                                |
|--|--|--|-----------------------------------------------------------------------------------------------------------------------------------------------------------------------------------------------------------------------------------------------------------------------------------------------------------------------------------------------------------------------------------------------------------------------------------------------------------------------------------------------------------------------------------------------------------------------------------------------------------------------------------------------------------------------------------------------------------------------------------------------------------------------------------------------------------------------------------------------------------------------------------------------------------------------------------------------------------------------------------------------------------------------------------------------------------------------------------------------------------------------------------------------------------|--|--|------------------------------------------------------------------------------------------------------------------------------------------------------------------------------------------------|
|  |  |  | ENSMUSG00000045322, ENSMUSG00000026068,<br>ENSMUSG00000025492, ENSMUSG00000055994,<br>ENSMUSG00000030149, ENSMUSG00000026896,<br>ENSMUSG0000000982, ENSMUSG00000053175,<br>ENSMUSG00000026656, ENSMUSG00000023913,<br>ENSMUSG00000029075, ENSMUSG00000026582,<br>ENSMUSG00000028268, ENSMUSG00000074151,<br>ENSMUSG00000040613, ENSMUSG00000036905,<br>ENSMUSG00000035352, ENSMUSG00000026822,<br>ENSMUSG00000029379, ENSMUSG00000051439,<br>ENSMUSG00000037202, ENSMUSG00000032691,<br>ENSMUSG00000030413, ENSMUSG00000027398,<br>ENSMUSG00000027639, ENSMUSG00000034459,<br>ENSMUSG00000028362, ENSMUSG00000055170,<br>ENSMUSG00000079363, ENSMUSG00000035042,<br>ENSMUSG00000058715, ENSMUSG00000004296,<br>ENSMUSG00000076612, ENSMUSG00000000791,<br>ENSMUSG00000015947, ENSMUSG00000021624,<br>ENSMUSG00000040026, ENSMUSG00000023078,<br>ENSMUSG00000041515, ENSMUSG00000037440,<br>ENSMUSG00000078920, ENSMUSG00000024401,<br>ENSMUSG00000090231, ENSMUSG00000054588,<br>ENSMUSG00000026580, ENSMUSG00000025746,<br>ENSMUSG00000033777, ENSMUSG00000060802,<br>ENSMUSG00000009185, ENSMUSG00000079563,<br>ENSMUSG00000037731, ENSMUSG00000016529, |  |  | ENSMUSG00000022040, ENSMUSG00000043496,<br>ENSMUSG00000010051, ENSMUSG00000062778,<br>ENSMUSG00000037071, ENSMUSG00000031780,<br>ENSMUSG00000056978, ENSMUSG00000046834,<br>ENSMUSG00000061958 |
|--|--|--|-----------------------------------------------------------------------------------------------------------------------------------------------------------------------------------------------------------------------------------------------------------------------------------------------------------------------------------------------------------------------------------------------------------------------------------------------------------------------------------------------------------------------------------------------------------------------------------------------------------------------------------------------------------------------------------------------------------------------------------------------------------------------------------------------------------------------------------------------------------------------------------------------------------------------------------------------------------------------------------------------------------------------------------------------------------------------------------------------------------------------------------------------------------|--|--|------------------------------------------------------------------------------------------------------------------------------------------------------------------------------------------------|

|  |  |  |  |                                                                                                                                                                                                                                                                                                                                                                                                                                                                                                                                                                                                                                                                                                                                                                                                                                                                                                                                                                                                                                                                                                                                                            |  |  |  |
|--|--|--|--|------------------------------------------------------------------------------------------------------------------------------------------------------------------------------------------------------------------------------------------------------------------------------------------------------------------------------------------------------------------------------------------------------------------------------------------------------------------------------------------------------------------------------------------------------------------------------------------------------------------------------------------------------------------------------------------------------------------------------------------------------------------------------------------------------------------------------------------------------------------------------------------------------------------------------------------------------------------------------------------------------------------------------------------------------------------------------------------------------------------------------------------------------------|--|--|--|
|  |  |  |  | ENSMUSG00000030148, ENSMUSG00000018930,<br>ENSMUSG00000070034, ENSMUSG00000040253,<br>ENSMUSG00000026222, ENSMUSG00000023341,<br>ENSMUSG00000034652, ENSMUSG00000025804,<br>ENSMUSG00000051498, ENSMUSG00000046718,<br>ENSMUSG00000022534, ENSMUSG00000054072,<br>ENSMUSG00000026770, ENSMUSG00000034855,<br>ENSMUSG00000044701, ENSMUSG00000005696,<br>ENSMUSG00000018920, ENSMUSG00000039236,<br>ENSMUSG00000079362, ENSMUSG00000028270,<br>ENSMUSG00000035373, ENSMUSG00000024371,<br>ENSMUSG00000038357, ENSMUSG00000057465,<br>ENSMUSG00000055172, ENSMUSG00000030793,<br>ENSMUSG00000003283, ENSMUSG00000048806,<br>ENSMUSG00000044583, ENSMUSG00000000386,<br>ENSMUSG00000029380, ENSMUSG00000053219,<br>ENSMUSG00000037872, ENSMUSG00000030017,<br>ENSMUSG00000058427, ENSMUSG00000029417,<br>ENSMUSG00000029298, ENSMUSG00000074115,<br>ENSMUSG00000035385, ENSMUSG00000020641,<br>ENSMUSG00000040017, ENSMUSG00000026166,<br>ENSMUSG00000029915, ENSMUSG00000028874,<br>ENSMUSG00000079227, ENSMUSG00000027514,<br>ENSMUSG00000021423, ENSMUSG00000028269,<br>ENSMUSG00000026104, ENSMUSG00000056529,<br>ENSMUSG00000092005, ENSMUSG00000024349, |  |  |  |
|--|--|--|--|------------------------------------------------------------------------------------------------------------------------------------------------------------------------------------------------------------------------------------------------------------------------------------------------------------------------------------------------------------------------------------------------------------------------------------------------------------------------------------------------------------------------------------------------------------------------------------------------------------------------------------------------------------------------------------------------------------------------------------------------------------------------------------------------------------------------------------------------------------------------------------------------------------------------------------------------------------------------------------------------------------------------------------------------------------------------------------------------------------------------------------------------------------|--|--|--|

|            |                                              |          |    |                                                                                                                                                                                                                                                                                                                                                                                                                                                                                                                                                                             |   |   |                                                                                                          |
|------------|----------------------------------------------|----------|----|-----------------------------------------------------------------------------------------------------------------------------------------------------------------------------------------------------------------------------------------------------------------------------------------------------------------------------------------------------------------------------------------------------------------------------------------------------------------------------------------------------------------------------------------------------------------------------|---|---|----------------------------------------------------------------------------------------------------------|
|            |                                              |          |    | ENSMUSG00000026981, ENSMUSG00000022901,<br>ENSMUSG00000044827, ENSMUSG00000029371,<br>ENSMUSG00000032661, ENSMUSG00000046879,<br>ENSMUSG00000034438, ENSMUSG00000041347,<br>ENSMUSG00000026177                                                                                                                                                                                                                                                                                                                                                                              |   |   |                                                                                                          |
| GO:0050715 | positive regulation of<br>cytokine secretion | 1.17E-06 | 15 | ENSMUSG00000030142, ENSMUSG00000055170,<br>ENSMUSG00000027995, ENSMUSG00000030793,<br>ENSMUSG00000029915, ENSMUSG00000055994,<br>ENSMUSG00000028874, ENSMUSG00000024401,<br>ENSMUSG00000051439, ENSMUSG00000074115,<br>ENSMUSG00000044811, ENSMUSG00000016529,<br>ENSMUSG00000000982, ENSMUSG00000079227,<br>ENSMUSG00000032691                                                                                                                                                                                                                                             | 1 | 5 | ENSMUSG00000031495, ENSMUSG00000026874,<br>ENSMUSG00000032076, ENSMUSG00000062778,<br>ENSMUSG00000010047 |
| GO:0009615 | response to virus                            | 1.39E-22 | 40 | ENSMUSG00000024079, ENSMUSG00000040613,<br>ENSMUSG00000035692, ENSMUSG00000026822,<br>ENSMUSG00000060747, ENSMUSG00000029417,<br>ENSMUSG00000066861, ENSMUSG00000037202,<br>ENSMUSG00000053977, ENSMUSG00000032691,<br>ENSMUSG00000020641, ENSMUSG00000029605,<br>ENSMUSG00000029915, ENSMUSG00000023341,<br>ENSMUSG00000040296, ENSMUSG00000046718,<br>ENSMUSG00000045932, ENSMUSG00000027639,<br>ENSMUSG00000034855, ENSMUSG00000027514,<br>ENSMUSG00000034459, ENSMUSG00000055170,<br>ENSMUSG00000039236, ENSMUSG00000045322,<br>ENSMUSG00000025492, ENSMUSG00000024349, | 1 | 4 | ENSMUSG00000034783, ENSMUSG00000010051,<br>ENSMUSG00000010047, ENSMUSG00000015405                        |

|            |                                          |          |    |                                                                                                                                                                                                                                                                                                                                                                                                                                                                                                                                                                                                   |          |    |                                                                                                                                                                                                                     |
|------------|------------------------------------------|----------|----|---------------------------------------------------------------------------------------------------------------------------------------------------------------------------------------------------------------------------------------------------------------------------------------------------------------------------------------------------------------------------------------------------------------------------------------------------------------------------------------------------------------------------------------------------------------------------------------------------|----------|----|---------------------------------------------------------------------------------------------------------------------------------------------------------------------------------------------------------------------|
|            |                                          |          |    | ENSMUSG00000026573, ENSMUSG00000026896,<br>ENSMUSG00000004296, ENSMUSG00000053175,<br>ENSMUSG00000022901, ENSMUSG00000025498,<br>ENSMUSG00000032661, ENSMUSG00000036986,<br>ENSMUSG00000079017, ENSMUSG00000024401,<br>ENSMUSG00000048806, ENSMUSG00000000386,<br>ENSMUSG00000025746, ENSMUSG00000044583                                                                                                                                                                                                                                                                                          |          |    |                                                                                                                                                                                                                     |
| GO:0051222 | positive regulation of protein transport | 1.70E-08 | 27 | ENSMUSG00000030142, ENSMUSG00000055170,<br>ENSMUSG00000027995, ENSMUSG00000045322,<br>ENSMUSG00000055994, ENSMUSG00000071005,<br>ENSMUSG00000027699, ENSMUSG00000024349,<br>ENSMUSG00000051439, ENSMUSG00000074115,<br>ENSMUSG00000016529, ENSMUSG00000000982,<br>ENSMUSG00000032691, ENSMUSG00000019942,<br>ENSMUSG00000030793, ENSMUSG00000029075,<br>ENSMUSG00000028874, ENSMUSG00000029915,<br>ENSMUSG00000024401, ENSMUSG00000040296,<br>ENSMUSG00000020053, ENSMUSG00000044583,<br>ENSMUSG00000025746, ENSMUSG00000027398,<br>ENSMUSG00000044811, ENSMUSG00000079227,<br>ENSMUSG00000078817 | 1        | 9  | ENSMUSG00000024990, ENSMUSG00000034584,<br>ENSMUSG00000031495, ENSMUSG00000059201,<br>ENSMUSG00000062778, ENSMUSG00000059327,<br>ENSMUSG00000026874, ENSMUSG00000032076,<br>ENSMUSG00000010047                      |
| GO:0014706 | striated muscle tissue development       | 1        | 2  | ENSMUSG00000022587, ENSMUSG00000020053                                                                                                                                                                                                                                                                                                                                                                                                                                                                                                                                                            | 1.59E-05 | 29 | ENSMUSG00000009471, ENSMUSG00000021506,<br>ENSMUSG00000035458, ENSMUSG00000032366,<br>ENSMUSG00000027470, ENSMUSG00000035606,<br>ENSMUSG00000052911, ENSMUSG00000031274,<br>ENSMUSG00000032340, ENSMUSG00000046714, |

|            |                                              |                 |    |                                                                                                                                                                                                                                                                                                                                 |          |   |                                                                                                                                                                                                                                                                                                                                                                                                                    |
|------------|----------------------------------------------|-----------------|----|---------------------------------------------------------------------------------------------------------------------------------------------------------------------------------------------------------------------------------------------------------------------------------------------------------------------------------|----------|---|--------------------------------------------------------------------------------------------------------------------------------------------------------------------------------------------------------------------------------------------------------------------------------------------------------------------------------------------------------------------------------------------------------------------|
|            |                                              |                 |    |                                                                                                                                                                                                                                                                                                                                 |          |   | ENSMUSG0000007815, ENSMUSG00000091898,<br>ENSMUSG00000030672, ENSMUSG00000053093,<br>ENSMUSG00000021909, ENSMUSG00000031972,<br>ENSMUSG00000024990, ENSMUSG00000022996,<br>ENSMUSG00000045103, ENSMUSG00000059741,<br>ENSMUSG00000026459, ENSMUSG00000049641,<br>ENSMUSG0000006235, ENSMUSG00000026418,<br>ENSMUSG0000007877, ENSMUSG00000031980,<br>ENSMUSG00000040289, ENSMUSG00000038119,<br>ENSMUSG00000040752 |
| GO:0015669 | gas transport                                | 1               | 0  |                                                                                                                                                                                                                                                                                                                                 | 4.80E-06 | 9 | ENSMUSG00000020295, ENSMUSG00000073063,<br>ENSMUSG00000078621, ENSMUSG00000018893,<br>ENSMUSG00000021032, ENSMUSG00000055609,<br>ENSMUSG00000052305, ENSMUSG00000052187,<br>ENSMUSG00000052217                                                                                                                                                                                                                     |
| GO:0051250 | negative regulation of lymphocyte activation | 0.00171868<br>5 | 15 | ENSMUSG00000016496, ENSMUSG00000026656,<br>ENSMUSG00000036931, ENSMUSG00000030124,<br>ENSMUSG00000073412, ENSMUSG00000027843,<br>ENSMUSG00000016498, ENSMUSG00000026011,<br>ENSMUSG00000071552, ENSMUSG00000022876,<br>ENSMUSG00000048806, ENSMUSG00000026573,<br>ENSMUSG00000016529, ENSMUSG00000031551,<br>ENSMUSG00000026770 | 1        | 2 | ENSMUSG00000063632, ENSMUSG00000024653                                                                                                                                                                                                                                                                                                                                                                             |
| GO:0042102 | positive regulation of T cell proliferation  | 0.00026321<br>1 | 14 | ENSMUSG00000055170, ENSMUSG00000075122,<br>ENSMUSG00000035042, ENSMUSG00000016498,<br>ENSMUSG00000024397, ENSMUSG00000026573,                                                                                                                                                                                                   | 1        | 0 |                                                                                                                                                                                                                                                                                                                                                                                                                    |

|            |                                           |          |    |                                                                                                                                                                                                                                                                                                                                                                                                 |   |   |                                                                                                                                                      |
|------------|-------------------------------------------|----------|----|-------------------------------------------------------------------------------------------------------------------------------------------------------------------------------------------------------------------------------------------------------------------------------------------------------------------------------------------------------------------------------------------------|---|---|------------------------------------------------------------------------------------------------------------------------------------------------------|
|            |                                           |          |    | ENSMUSG00000020053, ENSMUSG000000025746,<br>ENSMUSG00000027398, ENSMUSG00000049103,<br>ENSMUSG00000004296, ENSMUSG00000000791,<br>ENSMUSG00000026770, ENSMUSG00000022901                                                                                                                                                                                                                        |   |   |                                                                                                                                                      |
| GO:0002831 | regulation of response to biotic stimulus | 1.66E-05 | 13 | ENSMUSG00000050241, ENSMUSG00000029371,<br>ENSMUSG00000035042, ENSMUSG00000055994,<br>ENSMUSG00000079620, ENSMUSG00000036986,<br>ENSMUSG00000024349, ENSMUSG00000026573,<br>ENSMUSG00000040296, ENSMUSG0000004296,<br>ENSMUSG00000034459, ENSMUSG00000000791,<br>ENSMUSG00000026770                                                                                                             | 1 | 0 |                                                                                                                                                      |
| GO:0031341 | regulation of cell killing                | 1.25E-10 | 18 | ENSMUSG00000005696, ENSMUSG000000055170,<br>ENSMUSG00000060802, ENSMUSG00000030149,<br>ENSMUSG00000026573, ENSMUSG00000061232,<br>ENSMUSG00000073406, ENSMUSG00000004296,<br>ENSMUSG00000073411, ENSMUSG00000050241,<br>ENSMUSG00000029371, ENSMUSG00000030124,<br>ENSMUSG00000079620, ENSMUSG00000079298,<br>ENSMUSG00000024339, ENSMUSG00000079227,<br>ENSMUSG00000037321, ENSMUSG00000067212 | 1 | 2 | ENSMUSG00000090877, ENSMUSG00000032076                                                                                                               |
| GO:0048285 | organelle fission                         | 8.06E-17 | 47 | ENSMUSG00000017716, ENSMUSG00000015880,<br>ENSMUSG00000024791, ENSMUSG00000050107,<br>ENSMUSG00000045273, ENSMUSG00000024989,<br>ENSMUSG00000068744, ENSMUSG00000019942,<br>ENSMUSG00000045328, ENSMUSG00000006398,<br>ENSMUSG00000028873, ENSMUSG00000002055,                                                                                                                                  | 1 | 7 | ENSMUSG00000007815, ENSMUSG00000025862,<br>ENSMUSG00000001403, ENSMUSG00000062380,<br>ENSMUSG00000024500, ENSMUSG00000031176,<br>ENSMUSG000000036782 |

|            |                                        |          |    |                                                                                                                                                                                                                                                                                                                                                                                                                                                                                                                                                                                                                                                                                                                                                                                                                        |   |    |                                                                                                                                                                                                                                                                                                                                                                          |
|------------|----------------------------------------|----------|----|------------------------------------------------------------------------------------------------------------------------------------------------------------------------------------------------------------------------------------------------------------------------------------------------------------------------------------------------------------------------------------------------------------------------------------------------------------------------------------------------------------------------------------------------------------------------------------------------------------------------------------------------------------------------------------------------------------------------------------------------------------------------------------------------------------------------|---|----|--------------------------------------------------------------------------------------------------------------------------------------------------------------------------------------------------------------------------------------------------------------------------------------------------------------------------------------------------------------------------|
|            |                                        |          |    | <p>ENSMUSG00000027379, ENSMUSG00000024056,<br/> ENSMUSG00000027469, ENSMUSG00000027331,<br/> ENSMUSG00000027715, ENSMUSG00000029414,<br/> ENSMUSG00000044201, ENSMUSG00000026683,<br/> ENSMUSG00000023505, ENSMUSG00000041431,<br/> ENSMUSG00000040084, ENSMUSG00000036223,<br/> ENSMUSG00000027306, ENSMUSG00000023015,<br/> ENSMUSG00000024795, ENSMUSG00000069910,<br/> ENSMUSG00000025001, ENSMUSG00000048922,<br/> ENSMUSG00000051378, ENSMUSG00000020897,<br/> ENSMUSG00000017499, ENSMUSG00000071350,<br/> ENSMUSG00000020415, ENSMUSG00000028678,<br/> ENSMUSG00000012443, ENSMUSG00000030867,<br/> ENSMUSG00000074476, ENSMUSG00000017861,<br/> ENSMUSG00000023940, ENSMUSG00000072082,<br/> ENSMUSG00000026779, ENSMUSG00000033952,<br/> ENSMUSG00000058290, ENSMUSG00000032218,<br/> ENSMUSG00000027496</p> |   |    |                                                                                                                                                                                                                                                                                                                                                                          |
| GO:0071310 | cellular response to organic substance | 9.62E-08 | 66 | <p>ENSMUSG00000066861, ENSMUSG00000049103,<br/> ENSMUSG00000018899, ENSMUSG00000078853,<br/> ENSMUSG00000026073, ENSMUSG00000028072,<br/> ENSMUSG00000054203, ENSMUSG00000040253,<br/> ENSMUSG00000025804, ENSMUSG00000040264,<br/> ENSMUSG00000045932, ENSMUSG00000000182,<br/> ENSMUSG00000054072, ENSMUSG00000026770,<br/> ENSMUSG00000091875, ENSMUSG00000038037,</p>                                                                                                                                                                                                                                                                                                                                                                                                                                              | 1 | 32 | <p>ENSMUSG00000031134, ENSMUSG00000009471,<br/> ENSMUSG00000025810, ENSMUSG00000027796,<br/> ENSMUSG00000055980, ENSMUSG00000046532,<br/> ENSMUSG00000046714, ENSMUSG00000031841,<br/> ENSMUSG00000024028, ENSMUSG00000018566,<br/> ENSMUSG00000021055, ENSMUSG00000020889,<br/> ENSMUSG0000005705, ENSMUSG00000022996,<br/> ENSMUSG00000031760, ENSMUSG00000029195,</p> |



|            |                        |          |    |                                                                                                                                                                                                                                                                                                                                                                                                                                                                                                                                                                                                                                                                                                                                                                                                                                                                                                                                                                                                                                                                                                              |   |   |                                                                                                                                                                                                                                                                                                                                                     |
|------------|------------------------|----------|----|--------------------------------------------------------------------------------------------------------------------------------------------------------------------------------------------------------------------------------------------------------------------------------------------------------------------------------------------------------------------------------------------------------------------------------------------------------------------------------------------------------------------------------------------------------------------------------------------------------------------------------------------------------------------------------------------------------------------------------------------------------------------------------------------------------------------------------------------------------------------------------------------------------------------------------------------------------------------------------------------------------------------------------------------------------------------------------------------------------------|---|---|-----------------------------------------------------------------------------------------------------------------------------------------------------------------------------------------------------------------------------------------------------------------------------------------------------------------------------------------------------|
|            |                        |          |    | ENSMUSG00000026068, ENSMUSG00000025492,<br>ENSMUSG00000079362, ENSMUSG00000028270,<br>ENSMUSG0000000982, ENSMUSG00000030793,<br>ENSMUSG00000028268, ENSMUSG00000028068,<br>ENSMUSG00000038418, ENSMUSG00000058818,<br>ENSMUSG00000048806, ENSMUSG00000053219,<br>ENSMUSG00000024079, ENSMUSG0000003665,<br>ENSMUSG00000078922, ENSMUSG00000029377,<br>ENSMUSG00000029811, ENSMUSG00000029298,<br>ENSMUSG00000043263, ENSMUSG00000035385,<br>ENSMUSG00000017146, ENSMUSG00000037860,<br>ENSMUSG00000073489, ENSMUSG00000039997,<br>ENSMUSG00000026535, ENSMUSG00000027398,<br>ENSMUSG00000034459, ENSMUSG00000041324,<br>ENSMUSG00000055170, ENSMUSG00000068227,<br>ENSMUSG00000079363, ENSMUSG00000028269,<br>ENSMUSG00000026104, ENSMUSG00000035042,<br>ENSMUSG00000071714, ENSMUSG00000024349,<br>ENSMUSG00000026573, ENSMUSG00000004296,<br>ENSMUSG00000000791, ENSMUSG00000049734,<br>ENSMUSG00000023078, ENSMUSG00000073555,<br>ENSMUSG00000074896, ENSMUSG00000024401,<br>ENSMUSG00000034438, ENSMUSG00000026580,<br>ENSMUSG00000054588, ENSMUSG00000025746,<br>ENSMUSG00000037868, ENSMUSG00000071713 |   |   | ENSMUSG00000010051, ENSMUSG00000026459,<br>ENSMUSG00000029361, ENSMUSG00000022878,<br>ENSMUSG00000042812, ENSMUSG00000059201,<br>ENSMUSG00000041658, ENSMUSG00000005373,<br>ENSMUSG00000035486, ENSMUSG00000001494,<br>ENSMUSG00000027820, ENSMUSG00000031144,<br>ENSMUSG00000030747, ENSMUSG00000042903,<br>ENSMUSG00000006235, ENSMUSG00000010047 |
| GO:0002704 | negative regulation of | 5.71E-06 | 10 | ENSMUSG00000026656, ENSMUSG00000050241,                                                                                                                                                                                                                                                                                                                                                                                                                                                                                                                                                                                                                                                                                                                                                                                                                                                                                                                                                                                                                                                                      | 1 | 0 |                                                                                                                                                                                                                                                                                                                                                     |

|            |                                           |                 |    |                                                                                                                                                                                                                                                                                                                                                                                                                                                                                                 |             |    |                                                                                                                                                                                                                                                                                        |
|------------|-------------------------------------------|-----------------|----|-------------------------------------------------------------------------------------------------------------------------------------------------------------------------------------------------------------------------------------------------------------------------------------------------------------------------------------------------------------------------------------------------------------------------------------------------------------------------------------------------|-------------|----|----------------------------------------------------------------------------------------------------------------------------------------------------------------------------------------------------------------------------------------------------------------------------------------|
|            | leukocyte mediated immunity               |                 |    | ENSMUSG00000055994, ENSMUSG00000079298, ENSMUSG00000079620, ENSMUSG00000024339, ENSMUSG00000048806, ENSMUSG00000026573, ENSMUSG00000073406, ENSMUSG00000037321                                                                                                                                                                                                                                                                                                                                  |             |    |                                                                                                                                                                                                                                                                                        |
| GO:0002673 | regulation of acute inflammatory response | 0.00389412<br>6 | 11 | ENSMUSG00000026656, ENSMUSG00000035042, ENSMUSG00000024401, ENSMUSG00000058715, ENSMUSG00000025746, ENSMUSG00000025804, ENSMUSG00000027398, ENSMUSG00000079227, ENSMUSG00000030111, ENSMUSG00000015947, ENSMUSG00000025473                                                                                                                                                                                                                                                                      | 1           | 0  |                                                                                                                                                                                                                                                                                        |
| GO:0060048 | cardiac muscle contraction                | 1               | 0  |                                                                                                                                                                                                                                                                                                                                                                                                                                                                                                 | 0.005674685 | 8  | ENSMUSG00000059741, ENSMUSG00000091898, ENSMUSG00000035458, ENSMUSG00000061086, ENSMUSG00000032366, ENSMUSG00000021909, ENSMUSG00000061816, ENSMUSG00000020623                                                                                                                         |
| GO:0051707 | response to other organism                | 2.09E-41        | 91 | ENSMUSG00000060802, ENSMUSG00000027995, ENSMUSG00000035692, ENSMUSG00000066861, ENSMUSG00000079563, ENSMUSG00000061232, ENSMUSG00000016529, ENSMUSG00000053977, ENSMUSG00000029605, ENSMUSG00000070034, ENSMUSG00000040253, ENSMUSG00000023341, ENSMUSG00000040296, ENSMUSG00000025804, ENSMUSG00000046718, ENSMUSG00000051498, ENSMUSG00000045932, ENSMUSG00000054072, ENSMUSG00000034855, ENSMUSG00000031551, ENSMUSG00000039236, ENSMUSG00000069874, ENSMUSG00000045322, ENSMUSG00000025492, | 1           | 14 | ENSMUSG00000020889, ENSMUSG00000031495, ENSMUSG00000025889, ENSMUSG00000034783, ENSMUSG00000010051, ENSMUSG00000059230, ENSMUSG00000028036, ENSMUSG00000015405, ENSMUSG00000037071, ENSMUSG00000036216, ENSMUSG00000025991, ENSMUSG00000056978, ENSMUSG00000035459, ENSMUSG00000010047 |

|  |  |  |  |                                                                                                                                                                                                                                                                                                                                                                                                                                                                                                                                                                                                                                                                                                                                                                                                                                                                                                                                                                                                                                                                                                                                                            |  |  |  |
|--|--|--|--|------------------------------------------------------------------------------------------------------------------------------------------------------------------------------------------------------------------------------------------------------------------------------------------------------------------------------------------------------------------------------------------------------------------------------------------------------------------------------------------------------------------------------------------------------------------------------------------------------------------------------------------------------------------------------------------------------------------------------------------------------------------------------------------------------------------------------------------------------------------------------------------------------------------------------------------------------------------------------------------------------------------------------------------------------------------------------------------------------------------------------------------------------------|--|--|--|
|  |  |  |  | ENSMUSG00000079362, ENSMUSG00000055994,<br>ENSMUSG00000030149, ENSMUSG00000028270,<br>ENSMUSG00000038357, ENSMUSG00000026896,<br>ENSMUSG00000000982, ENSMUSG00000053175,<br>ENSMUSG00000025498, ENSMUSG00000026656,<br>ENSMUSG00000003283, ENSMUSG00000028268,<br>ENSMUSG00000079017, ENSMUSG00000048806,<br>ENSMUSG00000000386, ENSMUSG00000044583,<br>ENSMUSG00000022126, ENSMUSG00000053219,<br>ENSMUSG00000024079, ENSMUSG00000027832,<br>ENSMUSG00000040613, ENSMUSG00000026822,<br>ENSMUSG00000058427, ENSMUSG00000060747,<br>ENSMUSG00000029417, ENSMUSG00000038209,<br>ENSMUSG00000029298, ENSMUSG00000051439,<br>ENSMUSG00000037202, ENSMUSG00000035385,<br>ENSMUSG00000032691, ENSMUSG00000020641,<br>ENSMUSG00000020638, ENSMUSG00000030413,<br>ENSMUSG00000028874, ENSMUSG00000029915,<br>ENSMUSG00000027398, ENSMUSG00000059089,<br>ENSMUSG00000027639, ENSMUSG00000079227,<br>ENSMUSG00000027514, ENSMUSG00000034459,<br>ENSMUSG00000028362, ENSMUSG00000055170,<br>ENSMUSG00000028269, ENSMUSG00000026104,<br>ENSMUSG00000035042, ENSMUSG00000056529,<br>ENSMUSG00000058715, ENSMUSG00000024349,<br>ENSMUSG00000026573, ENSMUSG00000076612, |  |  |  |
|--|--|--|--|------------------------------------------------------------------------------------------------------------------------------------------------------------------------------------------------------------------------------------------------------------------------------------------------------------------------------------------------------------------------------------------------------------------------------------------------------------------------------------------------------------------------------------------------------------------------------------------------------------------------------------------------------------------------------------------------------------------------------------------------------------------------------------------------------------------------------------------------------------------------------------------------------------------------------------------------------------------------------------------------------------------------------------------------------------------------------------------------------------------------------------------------------------|--|--|--|

|            |                                              |                 |    |                                                                                                                                                                                                                                                                                                                                                                                                                                                                                                                                                                                                     |             |    |                                                                                                                                                                                                                                                                                                                                                                                                                                                                                                                                                                                                                                                                                                                                                        |
|------------|----------------------------------------------|-----------------|----|-----------------------------------------------------------------------------------------------------------------------------------------------------------------------------------------------------------------------------------------------------------------------------------------------------------------------------------------------------------------------------------------------------------------------------------------------------------------------------------------------------------------------------------------------------------------------------------------------------|-------------|----|--------------------------------------------------------------------------------------------------------------------------------------------------------------------------------------------------------------------------------------------------------------------------------------------------------------------------------------------------------------------------------------------------------------------------------------------------------------------------------------------------------------------------------------------------------------------------------------------------------------------------------------------------------------------------------------------------------------------------------------------------------|
|            |                                              |                 |    | ENSMUSG0000004296, ENSMUSG00000015947,<br>ENSMUSG00000022901, ENSMUSG00000044827,<br>ENSMUSG00000041515, ENSMUSG00000023078,<br>ENSMUSG00000029371, ENSMUSG00000032661,<br>ENSMUSG00000036986, ENSMUSG00000024401,<br>ENSMUSG00000054588, ENSMUSG00000024339,<br>ENSMUSG00000025746, ENSMUSG00000041347,<br>ENSMUSG00000026177                                                                                                                                                                                                                                                                      |             |    |                                                                                                                                                                                                                                                                                                                                                                                                                                                                                                                                                                                                                                                                                                                                                        |
| GO:0051346 | negative regulation of<br>hydrolase activity | 0.14408265<br>6 | 27 | ENSMUSG00000017716, ENSMUSG000000074148,<br>ENSMUSG00000029664, ENSMUSG00000066363,<br>ENSMUSG00000021403, ENSMUSG000000041481,<br>ENSMUSG00000059657, ENSMUSG00000068129,<br>ENSMUSG00000041536, ENSMUSG00000023132,<br>ENSMUSG00000001131, ENSMUSG00000058207,<br>ENSMUSG00000079597, ENSMUSG00000079012,<br>ENSMUSG00000024401, ENSMUSG00000025129,<br>ENSMUSG00000061947, ENSMUSG00000020053,<br>ENSMUSG00000025746, ENSMUSG00000066364,<br>ENSMUSG00000021091, ENSMUSG00000030111,<br>ENSMUSG00000066361, ENSMUSG00000034459,<br>ENSMUSG00000026779, ENSMUSG00000051949,<br>ENSMUSG00000021451 | 0.000273234 | 34 | ENSMUSG00000025889, ENSMUSG00000026715,<br>ENSMUSG00000090877, ENSMUSG00000041688,<br>ENSMUSG00000039278, ENSMUSG00000061311,<br>ENSMUSG00000026874, ENSMUSG00000023336,<br>ENSMUSG00000031760, ENSMUSG00000028356,<br>ENSMUSG00000030359, ENSMUSG00000058260,<br>ENSMUSG00000019278, ENSMUSG00000055561,<br>ENSMUSG00000022871, ENSMUSG00000070531,<br>ENSMUSG00000032060, ENSMUSG00000036867,<br>ENSMUSG00000029361, ENSMUSG00000000881,<br>ENSMUSG00000025860, ENSMUSG00000035458,<br>ENSMUSG00000055653, ENSMUSG00000022868,<br>ENSMUSG00000044594, ENSMUSG00000058017,<br>ENSMUSG00000067006, ENSMUSG00000059956,<br>ENSMUSG00000026327, ENSMUSG00000032081,<br>ENSMUSG00000032083, ENSMUSG00000027442,<br>ENSMUSG00000046814, ENSMUSG00000031980 |
| GO:0045087 | innate immune response                       | 1.74E-38        | 63 | ENSMUSG00000074151, ENSMUSG00000036905,                                                                                                                                                                                                                                                                                                                                                                                                                                                                                                                                                             | 1           | 5  | ENSMUSG00000046834, ENSMUSG00000025889,                                                                                                                                                                                                                                                                                                                                                                                                                                                                                                                                                                                                                                                                                                                |

|  |  |  |                                                                                                                                                                                                                                                                                                                                                                                                                                                                                                                                                                                                                                                                                                                                                                                                                                                                                                                                                                                                                                                                                                                                                           |  |  |                                                               |
|--|--|--|-----------------------------------------------------------------------------------------------------------------------------------------------------------------------------------------------------------------------------------------------------------------------------------------------------------------------------------------------------------------------------------------------------------------------------------------------------------------------------------------------------------------------------------------------------------------------------------------------------------------------------------------------------------------------------------------------------------------------------------------------------------------------------------------------------------------------------------------------------------------------------------------------------------------------------------------------------------------------------------------------------------------------------------------------------------------------------------------------------------------------------------------------------------|--|--|---------------------------------------------------------------|
|  |  |  | ENSMUSG00000027995, ENSMUSG00000026822,<br>ENSMUSG00000029298, ENSMUSG00000051439,<br>ENSMUSG00000017830, ENSMUSG00000035385,<br>ENSMUSG00000075404, ENSMUSG00000030413,<br>ENSMUSG00000030148, ENSMUSG00000029915,<br>ENSMUSG00000070034, ENSMUSG00000028874,<br>ENSMUSG00000040253, ENSMUSG00000022504,<br>ENSMUSG00000023341, ENSMUSG00000026222,<br>ENSMUSG00000040296, ENSMUSG00000040264,<br>ENSMUSG00000030144, ENSMUSG00000046718,<br>ENSMUSG00000051498, ENSMUSG00000027639,<br>ENSMUSG00000054072, ENSMUSG00000027514,<br>ENSMUSG00000034459, ENSMUSG00000044701,<br>ENSMUSG00000021423, ENSMUSG00000039236,<br>ENSMUSG00000018920, ENSMUSG00000028269,<br>ENSMUSG00000079363, ENSMUSG00000069874,<br>ENSMUSG00000045322, ENSMUSG00000026068,<br>ENSMUSG00000026104, ENSMUSG00000025492,<br>ENSMUSG00000079362, ENSMUSG00000092005,<br>ENSMUSG00000055994, ENSMUSG00000035042,<br>ENSMUSG00000024349, ENSMUSG00000028270,<br>ENSMUSG00000024371, ENSMUSG00000026896,<br>ENSMUSG0000004296, ENSMUSG00000000791,<br>ENSMUSG00000055172, ENSMUSG00000015947,<br>ENSMUSG00000021624, ENSMUSG00000044827,<br>ENSMUSG00000003283, ENSMUSG00000037440, |  |  | ENSMUSG00000061780, ENSMUSG00000043496,<br>ENSMUSG00000026874 |
|--|--|--|-----------------------------------------------------------------------------------------------------------------------------------------------------------------------------------------------------------------------------------------------------------------------------------------------------------------------------------------------------------------------------------------------------------------------------------------------------------------------------------------------------------------------------------------------------------------------------------------------------------------------------------------------------------------------------------------------------------------------------------------------------------------------------------------------------------------------------------------------------------------------------------------------------------------------------------------------------------------------------------------------------------------------------------------------------------------------------------------------------------------------------------------------------------|--|--|---------------------------------------------------------------|

|            |                                                                |                 |    |                                                                                                                                                                                                                                                                                      |          |    |                                                                                                                                                                                                                     |
|------------|----------------------------------------------------------------|-----------------|----|--------------------------------------------------------------------------------------------------------------------------------------------------------------------------------------------------------------------------------------------------------------------------------------|----------|----|---------------------------------------------------------------------------------------------------------------------------------------------------------------------------------------------------------------------|
|            |                                                                |                 |    | ENSMUSG00000046879, ENSMUSG00000028268,<br>ENSMUSG00000090231, ENSMUSG00000034438,<br>ENSMUSG00000054588, ENSMUSG00000000386,<br>ENSMUSG00000044583, ENSMUSG00000026177,<br>ENSMUSG00000033777                                                                                       |          |    |                                                                                                                                                                                                                     |
| GO:0001912 | positive regulation of<br>leukocyte mediated<br>cytotoxicity   | 3.18E-06        | 12 | ENSMUSG00000073411, ENSMUSG00000005696,<br>ENSMUSG00000066082, ENSMUSG00000050241,<br>ENSMUSG00000030124, ENSMUSG00000030149,<br>ENSMUSG00000024339, ENSMUSG00000026573,<br>ENSMUSG00000061232, ENSMUSG00000004296,<br>ENSMUSG00000037321, ENSMUSG00000067212                        | 1        | 2  | ENSMUSG00000090877, ENSMUSG00000032076                                                                                                                                                                              |
| GO:0052509 | positive regulation by<br>symbiont of host defense<br>response | 0.00351362<br>7 | 5  | ENSMUSG00000027995, ENSMUSG00000045322,<br>ENSMUSG00000044583, ENSMUSG00000051498,<br>ENSMUSG00000055994                                                                                                                                                                             | 1        | 0  |                                                                                                                                                                                                                     |
| GO:0002690 | positive regulation of<br>leukocyte chemotaxis                 | 8.90E-06        | 13 | ENSMUSG00000023913, ENSMUSG00000023078,<br>ENSMUSG00000018930, ENSMUSG00000035042,<br>ENSMUSG00000071005, ENSMUSG00000024397,<br>ENSMUSG00000026573, ENSMUSG00000040552,<br>ENSMUSG00000035373, ENSMUSG00000049103,<br>ENSMUSG00000035385, ENSMUSG00000000982,<br>ENSMUSG00000034855 | 1        | 0  |                                                                                                                                                                                                                     |
| GO:0008015 | blood circulation                                              | 1               | 7  | ENSMUSG00000030525, ENSMUSG00000040552,<br>ENSMUSG00000026104, ENSMUSG00000018930,<br>ENSMUSG00000041347, ENSMUSG00000031891,<br>ENSMUSG00000054136                                                                                                                                  | 4.89E-06 | 30 | ENSMUSG00000020123, ENSMUSG00000035458,<br>ENSMUSG00000059201, ENSMUSG00000032366,<br>ENSMUSG00000019326, ENSMUSG00000024039,<br>ENSMUSG00000041616, ENSMUSG00000046714,<br>ENSMUSG00000001865, ENSMUSG00000091898, |

|            |                                                     |                 |    |                                                                                                                                                                                                                                                                                                                                                                        |   |   |                                                                                                                                                                                                                                                                                                                                                                                                                |
|------------|-----------------------------------------------------|-----------------|----|------------------------------------------------------------------------------------------------------------------------------------------------------------------------------------------------------------------------------------------------------------------------------------------------------------------------------------------------------------------------|---|---|----------------------------------------------------------------------------------------------------------------------------------------------------------------------------------------------------------------------------------------------------------------------------------------------------------------------------------------------------------------------------------------------------------------|
|            |                                                     |                 |    |                                                                                                                                                                                                                                                                                                                                                                        |   |   | ENSMUSG00000061068, ENSMUSG00000002588, ENSMUSG00000021909, ENSMUSG00000041688, ENSMUSG00000061816, ENSMUSG00000022040, ENSMUSG00000031489, ENSMUSG00000061086, ENSMUSG00000020623, ENSMUSG00000015405, ENSMUSG00000059741, ENSMUSG00000029019, ENSMUSG00000022206, ENSMUSG00000037010, ENSMUSG00000029361, ENSMUSG00000031980, ENSMUSG00000057880, ENSMUSG00000024027, ENSMUSG00000022878, ENSMUSG00000040752 |
| GO:0002757 | immune response-activating signal transduction      | 2.99E-05        | 18 | ENSMUSG00000074148, ENSMUSG00000027995, ENSMUSG00000045322, ENSMUSG00000027843, ENSMUSG00000055994, ENSMUSG00000040751, ENSMUSG00000058715, ENSMUSG00000030149, ENSMUSG00000040552, ENSMUSG00000022901, ENSMUSG00000050241, ENSMUSG00000030413, ENSMUSG00000030365, ENSMUSG00000026011, ENSMUSG00000044583, ENSMUSG00000051498, ENSMUSG00000049109, ENSMUSG00000025473 | 1 | 0 |                                                                                                                                                                                                                                                                                                                                                                                                                |
| GO:0001916 | positive regulation of T cell mediated cytotoxicity | 0.00079680<br>1 | 8  | ENSMUSG00000073411, ENSMUSG00000060802, ENSMUSG00000024339, ENSMUSG00000026573, ENSMUSG00000061232, ENSMUSG00000037321, ENSMUSG0000004296, ENSMUSG00000067212                                                                                                                                                                                                          | 1 | 0 |                                                                                                                                                                                                                                                                                                                                                                                                                |
| GO:0019221 | cytokine-mediated signaling pathway                 | 3.28E-06        | 23 | ENSMUSG00000038037, ENSMUSG00000068227, ENSMUSG00000026068, ENSMUSG00000026104, ENSMUSG00000025492, ENSMUSG00000071714,                                                                                                                                                                                                                                                | 1 | 5 | ENSMUSG0000006235, ENSMUSG00000059201, ENSMUSG00000031760, ENSMUSG00000024028, ENSMUSG00000022878                                                                                                                                                                                                                                                                                                              |

|            |                                                 |                 |    |                                                                                                                                                                                                                                                                                                                                                                            |   |   |                                                                                                          |
|------------|-------------------------------------------------|-----------------|----|----------------------------------------------------------------------------------------------------------------------------------------------------------------------------------------------------------------------------------------------------------------------------------------------------------------------------------------------------------------------------|---|---|----------------------------------------------------------------------------------------------------------|
|            |                                                 |                 |    | ENSMUSG00000029377, ENSMUSG00000049103,<br>ENSMUSG00000035385, ENSMUSG00000004296,<br>ENSMUSG00000000791, ENSMUSG00000026073,<br>ENSMUSG00000030793, ENSMUSG00000023078,<br>ENSMUSG00000024401, ENSMUSG00000038418,<br>ENSMUSG00000058818, ENSMUSG00000025804,<br>ENSMUSG00000025746, ENSMUSG00000027398,<br>ENSMUSG00000054072, ENSMUSG00000071713,<br>ENSMUSG00000026770 |   |   |                                                                                                          |
| GO:0031348 | negative regulation of<br>defense response      | 0.00010057<br>9 | 16 | ENSMUSG00000055994, ENSMUSG00000030525,<br>ENSMUSG00000021322, ENSMUSG00000016529,<br>ENSMUSG00000073406, ENSMUSG00000004296,<br>ENSMUSG00000026656, ENSMUSG00000050241,<br>ENSMUSG00000079298, ENSMUSG00000024339,<br>ENSMUSG00000025804, ENSMUSG00000042726,<br>ENSMUSG00000030111, ENSMUSG00000037321,<br>ENSMUSG00000026770, ENSMUSG00000034459                        | 1 | 5 | ENSMUSG00000026715, ENSMUSG00000042812,<br>ENSMUSG00000024028, ENSMUSG00000022878,<br>ENSMUSG00000017697 |
| GO:0032649 | regulation of<br>interferon-gamma<br>production | 4.88E-07        | 16 | ENSMUSG00000044701, ENSMUSG00000050241,<br>ENSMUSG00000045322, ENSMUSG00000041515,<br>ENSMUSG00000055994, ENSMUSG00000024401,<br>ENSMUSG00000030149, ENSMUSG00000026573,<br>ENSMUSG00000044583, ENSMUSG00000027398,<br>ENSMUSG00000049103, ENSMUSG00000016529,<br>ENSMUSG00000004296, ENSMUSG00000000791,<br>ENSMUSG00000026177, ENSMUSG00000053175                        | 1 | 0 |                                                                                                          |
| GO:0051983 | regulation of chromosome                        | 0.00011357      | 9  | ENSMUSG00000045328, ENSMUSG00000017499,                                                                                                                                                                                                                                                                                                                                    | 1 | 0 |                                                                                                          |



|            |                                                                |                 |    |                                                                                                                                                                                                                                                                                                                                                                                                                                                                                                                                                                                                                                                                |   |   |                                                                                                                        |
|------------|----------------------------------------------------------------|-----------------|----|----------------------------------------------------------------------------------------------------------------------------------------------------------------------------------------------------------------------------------------------------------------------------------------------------------------------------------------------------------------------------------------------------------------------------------------------------------------------------------------------------------------------------------------------------------------------------------------------------------------------------------------------------------------|---|---|------------------------------------------------------------------------------------------------------------------------|
|            | segregation                                                    | 7               |    | ENSMUSG00000024791, ENSMUSG00000028678, ENSMUSG0000002055, ENSMUSG00000027379, ENSMUSG00000027699, ENSMUSG00000041431, ENSMUSG00000023015                                                                                                                                                                                                                                                                                                                                                                                                                                                                                                                      |   |   |                                                                                                                        |
| GO:0052553 | modulation by symbiont of host immune response                 | 0.00351362<br>7 | 5  | ENSMUSG00000027995, ENSMUSG00000045322, ENSMUSG00000044583, ENSMUSG00000051498, ENSMUSG00000055994                                                                                                                                                                                                                                                                                                                                                                                                                                                                                                                                                             | 1 | 0 |                                                                                                                        |
| GO:0052166 | positive regulation by symbiont of host innate immune response | 0.00351362<br>7 | 5  | ENSMUSG00000027995, ENSMUSG00000045322, ENSMUSG00000044583, ENSMUSG00000051498, ENSMUSG00000055994                                                                                                                                                                                                                                                                                                                                                                                                                                                                                                                                                             | 1 | 0 |                                                                                                                        |
| GO:0042742 | defense response to bacterium                                  | 1.00E-14        | 34 | ENSMUSG00000027995, ENSMUSG00000029298, ENSMUSG00000079563, ENSMUSG00000061232, ENSMUSG00000016529, ENSMUSG00000030413, ENSMUSG00000028874, ENSMUSG00000040253, ENSMUSG00000051498, ENSMUSG00000054072, ENSMUSG00000028362, ENSMUSG00000055170, ENSMUSG00000045322, ENSMUSG00000069874, ENSMUSG00000028269, ENSMUSG00000079362, ENSMUSG00000055994, ENSMUSG00000058715, ENSMUSG00000030149, ENSMUSG00000028270, ENSMUSG00000038357, ENSMUSG00000076612, ENSMUSG0000004296, ENSMUSG00000053175, ENSMUSG00000015947, ENSMUSG00000023078, ENSMUSG00000041515, ENSMUSG00000003283, ENSMUSG00000028268, ENSMUSG00000024401, ENSMUSG00000048806, ENSMUSG00000054588, | 1 | 6 | ENSMUSG00000036216, ENSMUSG00000031495, ENSMUSG00000056978, ENSMUSG00000035459, ENSMUSG00000059230, ENSMUSG00000037071 |

|            |                                                                        |          |    |                                                                                                                                                                                                                                                                                                                                                                                                                                                                                                                  |             |    |                                                                                                                                                                                                                                                 |
|------------|------------------------------------------------------------------------|----------|----|------------------------------------------------------------------------------------------------------------------------------------------------------------------------------------------------------------------------------------------------------------------------------------------------------------------------------------------------------------------------------------------------------------------------------------------------------------------------------------------------------------------|-------------|----|-------------------------------------------------------------------------------------------------------------------------------------------------------------------------------------------------------------------------------------------------|
|            |                                                                        |          |    | ENSMUSG00000053219, ENSMUSG00000026177                                                                                                                                                                                                                                                                                                                                                                                                                                                                           |             |    |                                                                                                                                                                                                                                                 |
| GO:0002699 | positive regulation of immune effector process                         | 5.16E-10 | 25 | ENSMUSG0000005696, ENSMUSG00000055170, ENSMUSG00000060802, ENSMUSG00000027995, ENSMUSG0000001444, ENSMUSG00000055994, ENSMUSG00000058715, ENSMUSG00000030149, ENSMUSG00000026573, ENSMUSG00000049103, ENSMUSG00000061232, ENSMUSG00000035385, ENSMUSG00000004296, ENSMUSG00000015947, ENSMUSG00000073411, ENSMUSG00000050241, ENSMUSG00000030124, ENSMUSG00000028874, ENSMUSG00000024401, ENSMUSG00000024339, ENSMUSG00000025746, ENSMUSG00000034652, ENSMUSG00000030895, ENSMUSG00000037321, ENSMUSG00000067212 | 1           | 3  | ENSMUSG00000090877, ENSMUSG00000042812, ENSMUSG00000032076                                                                                                                                                                                      |
| GO:0002474 | antigen processing and presentation of peptide antigen via MHC class I | 1.25E-07 | 11 | ENSMUSG00000073411, ENSMUSG00000060802, ENSMUSG00000058715, ENSMUSG00000073409, ENSMUSG00000024339, ENSMUSG00000035929, ENSMUSG00000061232, ENSMUSG00000037321, ENSMUSG00000015947, ENSMUSG00000060550, ENSMUSG00000067212                                                                                                                                                                                                                                                                                       | 1           | 0  |                                                                                                                                                                                                                                                 |
| GO:0006937 | regulation of muscle contraction                                       | 1        | 0  |                                                                                                                                                                                                                                                                                                                                                                                                                                                                                                                  | 0.005723771 | 14 | ENSMUSG00000061723, ENSMUSG00000030730, ENSMUSG00000031097, ENSMUSG00000064179, ENSMUSG00000035458, ENSMUSG00000027470, ENSMUSG00000007122, ENSMUSG00000032511, ENSMUSG00000017697, ENSMUSG00000029236, ENSMUSG00000059741, ENSMUSG00000091898, |

|            |                                                              |                 |    |                                                                                                                                                                                                                                                                                                                                                                                                                                  |   |   |                                        |
|------------|--------------------------------------------------------------|-----------------|----|----------------------------------------------------------------------------------------------------------------------------------------------------------------------------------------------------------------------------------------------------------------------------------------------------------------------------------------------------------------------------------------------------------------------------------|---|---|----------------------------------------|
|            |                                                              |                 |    |                                                                                                                                                                                                                                                                                                                                                                                                                                  |   |   | ENSMUSG00000026418, ENSMUSG00000021909 |
| GO:0052031 | modulation by symbiont of host defense response              | 0.00351362<br>7 | 5  | ENSMUSG00000027995, ENSMUSG00000045322, ENSMUSG00000044583, ENSMUSG00000051498, ENSMUSG00000055994                                                                                                                                                                                                                                                                                                                               | 1 | 0 |                                        |
| GO:0034341 | response to interferon-gamma                                 | 8.28E-18        | 21 | ENSMUSG00000018920, ENSMUSG00000028269, ENSMUSG00000079363, ENSMUSG00000069874, ENSMUSG00000026104, ENSMUSG00000079362, ENSMUSG00000035042, ENSMUSG00000028270, ENSMUSG00000029298, ENSMUSG00000035385, ENSMUSG0000004296, ENSMUSG0000000791, ENSMUSG00000075404, ENSMUSG00000028268, ENSMUSG00000040253, ENSMUSG00000022504, ENSMUSG00000034438, ENSMUSG00000054588, ENSMUSG00000026222, ENSMUSG00000040264, ENSMUSG00000026177 | 1 | 0 |                                        |
| GO:0051825 | adhesion to other organism involved in symbiotic interaction | 0.00051139<br>6 | 6  | ENSMUSG00000040253, ENSMUSG00000028270, ENSMUSG00000028269, ENSMUSG00000029298, ENSMUSG00000079362, ENSMUSG00000028268                                                                                                                                                                                                                                                                                                           | 1 | 0 |                                        |
| GO:0043901 | negative regulation of multi-organism process                | 4.08E-05        | 10 | ENSMUSG00000055170, ENSMUSG00000027995, ENSMUSG00000041515, ENSMUSG00000055994, ENSMUSG00000024401, ENSMUSG00000038357, ENSMUSG00000016529, ENSMUSG0000004296, ENSMUSG00000026770, ENSMUSG00000034459                                                                                                                                                                                                                            | 1 | 0 |                                        |
| GO:0045824 | negative regulation of innate immune response                | 0.00017017<br>6 | 8  | ENSMUSG00000024339, ENSMUSG00000050241, ENSMUSG00000025804, ENSMUSG00000073406, ENSMUSG00000037321, ENSMUSG00000042726,                                                                                                                                                                                                                                                                                                          | 1 | 0 |                                        |

|            |                                                  |             |    |                                                                                                                                                                                                                                                                                                                                                                                                                                                                                                                                                                                |   |   |                                                            |
|------------|--------------------------------------------------|-------------|----|--------------------------------------------------------------------------------------------------------------------------------------------------------------------------------------------------------------------------------------------------------------------------------------------------------------------------------------------------------------------------------------------------------------------------------------------------------------------------------------------------------------------------------------------------------------------------------|---|---|------------------------------------------------------------|
|            |                                                  |             |    | ENSMUSG00000079298, ENSMUSG00000030111                                                                                                                                                                                                                                                                                                                                                                                                                                                                                                                                         |   |   |                                                            |
| GO:0002703 | regulation of leukocyte mediated immunity        | 7.99E-13    | 28 | ENSMUSG00000055170, ENSMUSG00000055170, ENSMUSG00000060802, ENSMUSG00000001444, ENSMUSG00000055994, ENSMUSG00000058715, ENSMUSG00000030149, ENSMUSG00000026573, ENSMUSG00000049103, ENSMUSG00000061232, ENSMUSG00000073406, ENSMUSG00000004296, ENSMUSG00000015947, ENSMUSG00000026656, ENSMUSG00000073411, ENSMUSG00000050241, ENSMUSG00000029371, ENSMUSG00000030124, ENSMUSG00000028874, ENSMUSG00000079620, ENSMUSG00000079298, ENSMUSG00000024401, ENSMUSG00000024339, ENSMUSG00000048806, ENSMUSG00000034652, ENSMUSG00000030895, ENSMUSG00000037321, ENSMUSG00000067212 | 1 | 3 | ENSMUSG00000090877, ENSMUSG00000042812, ENSMUSG00000032076 |
| GO:0002366 | leukocyte activation involved in immune response | 9.62E-06    | 17 | ENSMUSG00000055170, ENSMUSG00000040528, ENSMUSG00000027995, ENSMUSG00000045322, ENSMUSG00000055994, ENSMUSG00000040751, ENSMUSG00000035673, ENSMUSG00000039748, ENSMUSG00000058715, ENSMUSG00000040627, ENSMUSG00000000982, ENSMUSG00000004296, ENSMUSG00000053175, ENSMUSG00000034652, ENSMUSG00000044583, ENSMUSG00000051498, ENSMUSG00000026177                                                                                                                                                                                                                             | 1 | 0 |                                                            |
| GO:0032653 | regulation of interleukin-10 production          | 0.000421029 | 9  | ENSMUSG00000026656, ENSMUSG00000045322, ENSMUSG00000055994, ENSMUSG00000058715,                                                                                                                                                                                                                                                                                                                                                                                                                                                                                                | 1 | 0 |                                                            |

|            |                                                           |                 |    |                                                                                                                                                                                                                                                                                                                                                                                                                       |   |   |                                        |
|------------|-----------------------------------------------------------|-----------------|----|-----------------------------------------------------------------------------------------------------------------------------------------------------------------------------------------------------------------------------------------------------------------------------------------------------------------------------------------------------------------------------------------------------------------------|---|---|----------------------------------------|
|            |                                                           |                 |    | ENSMUSG00000071552, ENSMUSG00000026573,<br>ENSMUSG00000004296, ENSMUSG00000031551,<br>ENSMUSG00000053175                                                                                                                                                                                                                                                                                                              |   |   |                                        |
| GO:0019882 | antigen processing and presentation                       | 9.74E-11        | 19 | ENSMUSG00000055170, ENSMUSG00000060802,<br>ENSMUSG00000067341, ENSMUSG00000058715,<br>ENSMUSG00000035929, ENSMUSG00000061232,<br>ENSMUSG00000015947, ENSMUSG00000060550,<br>ENSMUSG00000073411, ENSMUSG00000026656,<br>ENSMUSG00000078452, ENSMUSG00000073409,<br>ENSMUSG00000024339, ENSMUSG00000024337,<br>ENSMUSG00000024338, ENSMUSG00000037321,<br>ENSMUSG00000036469, ENSMUSG00000026177,<br>ENSMUSG00000067212 | 1 | 0 |                                        |
| GO:0045410 | positive regulation of interleukin-6 biosynthetic process | 0.00907611      | 5  | ENSMUSG00000029377, ENSMUSG00000055170,<br>ENSMUSG00000044827, ENSMUSG00000027398,<br>ENSMUSG00000051498                                                                                                                                                                                                                                                                                                              | 1 | 0 |                                        |
| GO:2000106 | regulation of leukocyte apoptosis                         | 0.00652128<br>7 | 10 | ENSMUSG00000036931, ENSMUSG00000020897,<br>ENSMUSG00000029075, ENSMUSG00000035042,<br>ENSMUSG00000055994, ENSMUSG00000071005,<br>ENSMUSG00000016529, ENSMUSG00000079227,<br>ENSMUSG00000031551, ENSMUSG00000025473                                                                                                                                                                                                    | 1 | 2 | ENSMUSG00000061311, ENSMUSG00000017697 |
| GO:0030595 | leukocyte chemotaxis                                      | 1.75E-13        | 23 | ENSMUSG00000055170, ENSMUSG00000035352,<br>ENSMUSG00000048534, ENSMUSG00000058427,<br>ENSMUSG00000029379, ENSMUSG00000035042,<br>ENSMUSG00000071005, ENSMUSG00000058715,<br>ENSMUSG00000026573, ENSMUSG00000035373,                                                                                                                                                                                                   | 1 | 0 |                                        |

|            |                                              |          |    |                                                                                                                                                                                                                                                                                                                                                                                                                                                                                                                                                                                |   |    |                                                                                                                                                                                                                            |
|------------|----------------------------------------------|----------|----|--------------------------------------------------------------------------------------------------------------------------------------------------------------------------------------------------------------------------------------------------------------------------------------------------------------------------------------------------------------------------------------------------------------------------------------------------------------------------------------------------------------------------------------------------------------------------------|---|----|----------------------------------------------------------------------------------------------------------------------------------------------------------------------------------------------------------------------------|
|            |                                              |          |    | ENSMUSG00000049103, ENSMUSG00000074115, ENSMUSG00000035385, ENSMUSG00000000982, ENSMUSG00000029304, ENSMUSG00000050232, ENSMUSG00000023078, ENSMUSG00000018930, ENSMUSG00000030786, ENSMUSG00000025804, ENSMUSG00000027398, ENSMUSG00000029380, ENSMUSG00000025473                                                                                                                                                                                                                                                                                                             |   |    |                                                                                                                                                                                                                            |
| GO:2000401 | regulation of lymphocyte migration           | 4.43E-07 | 10 | ENSMUSG00000023078, ENSMUSG00000018930, ENSMUSG00000035042, ENSMUSG00000022548, ENSMUSG00000024397, ENSMUSG00000026573, ENSMUSG00000035373, ENSMUSG00000049103, ENSMUSG00000035385, ENSMUSG00000000982                                                                                                                                                                                                                                                                                                                                                                         | 1 | 0  |                                                                                                                                                                                                                            |
| GO:0002684 | positive regulation of immune system process | 2.07E-24 | 69 | ENSMUSG00000060802, ENSMUSG00000027995, ENSMUSG00000036887, ENSMUSG00000049103, ENSMUSG00000061232, ENSMUSG00000018930, ENSMUSG00000020053, ENSMUSG00000034652, ENSMUSG00000030895, ENSMUSG00000051498, ENSMUSG00000037321, ENSMUSG00000034855, ENSMUSG00000031551, ENSMUSG00000026770, ENSMUSG00000025473, ENSMUSG0000005696, ENSMUSG00000045322, ENSMUSG00000001444, ENSMUSG00000040751, ENSMUSG00000055994, ENSMUSG00000030149, ENSMUSG00000040552, ENSMUSG00000035373, ENSMUSG00000024371, ENSMUSG00000000982, ENSMUSG00000055172, ENSMUSG00000023913, ENSMUSG00000050241, | 1 | 11 | ENSMUSG00000031380, ENSMUSG00000042812, ENSMUSG00000019326, ENSMUSG00000061780, ENSMUSG00000043496, ENSMUSG00000017697, ENSMUSG00000090877, ENSMUSG00000046834, ENSMUSG00000026874, ENSMUSG00000032076, ENSMUSG00000026532 |

|            |                                   |   |    |                                                                                                                                                                                                                                                                                                                                                                                                                                                                                                                                                                                                                                                                                                                                                                                                                                                                                                                                                               |             |    |                                                                                                                                                                                                                                  |
|------------|-----------------------------------|---|----|---------------------------------------------------------------------------------------------------------------------------------------------------------------------------------------------------------------------------------------------------------------------------------------------------------------------------------------------------------------------------------------------------------------------------------------------------------------------------------------------------------------------------------------------------------------------------------------------------------------------------------------------------------------------------------------------------------------------------------------------------------------------------------------------------------------------------------------------------------------------------------------------------------------------------------------------------------------|-------------|----|----------------------------------------------------------------------------------------------------------------------------------------------------------------------------------------------------------------------------------|
|            |                                   |   |    | <p>ENSMUSG00000029075, ENSMUSG00000030124,<br/> ENSMUSG00000026582, ENSMUSG00000016498,<br/> ENSMUSG00000024397, ENSMUSG00000044583,<br/> ENSMUSG00000074148, ENSMUSG00000036905,<br/> ENSMUSG00000071005, ENSMUSG00000029377,<br/> ENSMUSG00000035385, ENSMUSG00000073411,<br/> ENSMUSG00000030413, ENSMUSG00000075122,<br/> ENSMUSG00000028874, ENSMUSG00000030365,<br/> ENSMUSG00000026011, ENSMUSG00000027398,<br/> ENSMUSG00000067212, ENSMUSG00000055170,<br/> ENSMUSG00000027843, ENSMUSG00000035042,<br/> ENSMUSG00000092005, ENSMUSG00000058715,<br/> ENSMUSG00000024349, ENSMUSG00000026573,<br/> ENSMUSG00000020310, ENSMUSG00000004296,<br/> ENSMUSG00000000791, ENSMUSG00000022901,<br/> ENSMUSG00000015947, ENSMUSG00000023078,<br/> ENSMUSG00000037440, ENSMUSG00000024401,<br/> ENSMUSG00000090231, ENSMUSG00000024339,<br/> ENSMUSG00000026580, ENSMUSG00000025746,<br/> ENSMUSG00000041347, ENSMUSG00000049109,<br/> ENSMUSG00000026177</p> |             |    |                                                                                                                                                                                                                                  |
| GO:0019752 | carboxylic acid metabolic process | 1 | 13 | <p>ENSMUSG00000030268, ENSMUSG00000038963,<br/> ENSMUSG00000003484, ENSMUSG00000037440,<br/> ENSMUSG00000017146, ENSMUSG00000039519,<br/> ENSMUSG00000050370, ENSMUSG00000021266,<br/> ENSMUSG00000018907, ENSMUSG00000027199,</p>                                                                                                                                                                                                                                                                                                                                                                                                                                                                                                                                                                                                                                                                                                                            | 0.000136703 | 55 | <p>ENSMUSG00000037686, ENSMUSG00000032263,<br/> ENSMUSG00000033327, ENSMUSG00000032262,<br/> ENSMUSG00000025889, ENSMUSG00000062515,<br/> ENSMUSG00000020182, ENSMUSG00000046402,<br/> ENSMUSG0000002588, ENSMUSG0000002010,</p> |

|            |                                     |          |    |                                                                                                                               |   |    |                                                                                                                                                                                                                                                                                                                                                                                                                                                                                                                                                                                                                                                                                                                                                                                                                                                                                                                                                                                                     |
|------------|-------------------------------------|----------|----|-------------------------------------------------------------------------------------------------------------------------------|---|----|-----------------------------------------------------------------------------------------------------------------------------------------------------------------------------------------------------------------------------------------------------------------------------------------------------------------------------------------------------------------------------------------------------------------------------------------------------------------------------------------------------------------------------------------------------------------------------------------------------------------------------------------------------------------------------------------------------------------------------------------------------------------------------------------------------------------------------------------------------------------------------------------------------------------------------------------------------------------------------------------------------|
|            |                                     |          |    | ENSMUSG00000022126, ENSMUSG00000031551,<br>ENSMUSG00000020010                                                                 |   |    | ENSMUSG00000004038, ENSMUSG00000032310,<br>ENSMUSG00000032418, ENSMUSG00000027513,<br>ENSMUSG00000032807, ENSMUSG00000032279,<br>ENSMUSG00000067653, ENSMUSG00000019278,<br>ENSMUSG00000074183, ENSMUSG00000037071,<br>ENSMUSG00000029361, ENSMUSG00000032348,<br>ENSMUSG00000025202, ENSMUSG00000025153,<br>ENSMUSG00000057880, ENSMUSG00000073424,<br>ENSMUSG00000002769, ENSMUSG00000022878,<br>ENSMUSG00000078597, ENSMUSG00000030399,<br>ENSMUSG00000032349, ENSMUSG00000059201,<br>ENSMUSG00000066072, ENSMUSG00000021622,<br>ENSMUSG00000004885, ENSMUSG00000024039,<br>ENSMUSG00000030972, ENSMUSG00000058135,<br>ENSMUSG0000000168, ENSMUSG00000031299,<br>ENSMUSG00000025991, ENSMUSG00000032315,<br>ENSMUSG00000027820, ENSMUSG00000090150,<br>ENSMUSG00000022040, ENSMUSG00000075217,<br>ENSMUSG00000028167, ENSMUSG00000031425,<br>ENSMUSG00000024892, ENSMUSG00000029695,<br>ENSMUSG00000041220, ENSMUSG00000035202,<br>ENSMUSG00000050195, ENSMUSG00000020532,<br>ENSMUSG00000027380 |
| GO:0050727 | regulation of inflammatory response | 1.20E-05 | 24 | ENSMUSG00000045322, ENSMUSG00000035042,<br>ENSMUSG00000055994, ENSMUSG00000022548,<br>ENSMUSG00000035673, ENSMUSG00000058715, | 1 | 11 | ENSMUSG00000042812, ENSMUSG00000022868,<br>ENSMUSG00000019326, ENSMUSG00000062515,<br>ENSMUSG00000024653, ENSMUSG00000017697,                                                                                                                                                                                                                                                                                                                                                                                                                                                                                                                                                                                                                                                                                                                                                                                                                                                                       |



|            |                                      |          |    |                                                                                                                                                                                                                                                                                                                                                                                                                                                                                                                                                                                                                                                                                                                                                         |   |    |                                                                                                                                                                                                                                                               |
|------------|--------------------------------------|----------|----|---------------------------------------------------------------------------------------------------------------------------------------------------------------------------------------------------------------------------------------------------------------------------------------------------------------------------------------------------------------------------------------------------------------------------------------------------------------------------------------------------------------------------------------------------------------------------------------------------------------------------------------------------------------------------------------------------------------------------------------------------------|---|----|---------------------------------------------------------------------------------------------------------------------------------------------------------------------------------------------------------------------------------------------------------------|
|            |                                      |          |    | ENSMUSG00000030525, ENSMUSG00000026573,<br>ENSMUSG00000049103, ENSMUSG00000021322,<br>ENSMUSG00000016529, ENSMUSG00000000982,<br>ENSMUSG00000004296, ENSMUSG00000015947,<br>ENSMUSG00000026656, ENSMUSG00000024401,<br>ENSMUSG00000025746, ENSMUSG00000025804,<br>ENSMUSG00000027398, ENSMUSG00000079227,<br>ENSMUSG00000030111, ENSMUSG00000031551,<br>ENSMUSG00000026770, ENSMUSG00000025473                                                                                                                                                                                                                                                                                                                                                          |   |    | ENSMUSG00000026715, ENSMUSG00000024028,<br>ENSMUSG00000031980, ENSMUSG00000022878,<br>ENSMUSG00000010047                                                                                                                                                      |
| GO:0001817 | regulation of cytokine<br>production | 6.87E-19 | 56 | ENSMUSG00000027995, ENSMUSG00000029377,<br>ENSMUSG00000049103, ENSMUSG00000018899,<br>ENSMUSG00000051439, ENSMUSG00000074115,<br>ENSMUSG00000016529, ENSMUSG00000035385,<br>ENSMUSG00000032691, ENSMUSG00000018930,<br>ENSMUSG00000029915, ENSMUSG00000028874,<br>ENSMUSG00000030365, ENSMUSG00000040296,<br>ENSMUSG00000027398, ENSMUSG00000051498,<br>ENSMUSG00000044811, ENSMUSG00000079227,<br>ENSMUSG00000031551, ENSMUSG00000030921,<br>ENSMUSG00000025473, ENSMUSG00000044701,<br>ENSMUSG00000030142, ENSMUSG00000055170,<br>ENSMUSG00000028602, ENSMUSG00000045322,<br>ENSMUSG00000022548, ENSMUSG00000055994,<br>ENSMUSG00000035042, ENSMUSG00000058715,<br>ENSMUSG00000071552, ENSMUSG00000030149,<br>ENSMUSG00000030525, ENSMUSG00000040552, | 1 | 12 | ENSMUSG00000031380, ENSMUSG00000031495,<br>ENSMUSG00000024653, ENSMUSG00000043496,<br>ENSMUSG00000032083, ENSMUSG00000062778,<br>ENSMUSG00000026874, ENSMUSG00000033208,<br>ENSMUSG00000022878, ENSMUSG00000032076,<br>ENSMUSG00000010047, ENSMUSG00000024526 |

|            |                    |          |    |                                                                                                                                                                                                                                                                                                                                                                                                                                                                                                                                                                                                                                                                                                     |   |    |                                                                                                                                                                                                                                                                                |
|------------|--------------------|----------|----|-----------------------------------------------------------------------------------------------------------------------------------------------------------------------------------------------------------------------------------------------------------------------------------------------------------------------------------------------------------------------------------------------------------------------------------------------------------------------------------------------------------------------------------------------------------------------------------------------------------------------------------------------------------------------------------------------------|---|----|--------------------------------------------------------------------------------------------------------------------------------------------------------------------------------------------------------------------------------------------------------------------------------|
|            |                    |          |    | <p>ENSMUSG00000026573, ENSMUSG00000000982,<br/> ENSMUSG00000004296, ENSMUSG00000000791,<br/> ENSMUSG00000053175, ENSMUSG00000025498,<br/> ENSMUSG00000026656, ENSMUSG00000050241,<br/> ENSMUSG00000029371, ENSMUSG00000029075,<br/> ENSMUSG00000041515, ENSMUSG00000030793,<br/> ENSMUSG00000044827, ENSMUSG00000030124,<br/> ENSMUSG00000024401, ENSMUSG00000048806,<br/> ENSMUSG00000044583, ENSMUSG00000042345,<br/> ENSMUSG00000025746, ENSMUSG00000078817,<br/> ENSMUSG00000026177, ENSMUSG00000037872</p>                                                                                                                                                                                     |   |    |                                                                                                                                                                                                                                                                                |
| GO:0022402 | cell cycle process | 5.12E-15 | 71 | <p>ENSMUSG00000017716, ENSMUSG00000015880,<br/> ENSMUSG0000007080, ENSMUSG00000050107,<br/> ENSMUSG00000045273, ENSMUSG00000027699,<br/> ENSMUSG00000024989, ENSMUSG00000068744,<br/> ENSMUSG00000019942, ENSMUSG00000006398,<br/> ENSMUSG00000020255, ENSMUSG00000033644,<br/> ENSMUSG00000027379, ENSMUSG00000027331,<br/> ENSMUSG00000027715, ENSMUSG00000036912,<br/> ENSMUSG00000026683, ENSMUSG00000026039,<br/> ENSMUSG00000041431, ENSMUSG00000040084,<br/> ENSMUSG00000027306, ENSMUSG00000037313,<br/> ENSMUSG00000024795, ENSMUSG00000002307,<br/> ENSMUSG00000078763, ENSMUSG00000048922,<br/> ENSMUSG00000051378, ENSMUSG00000020897,<br/> ENSMUSG00000017499, ENSMUSG00000071350,</p> | 1 | 12 | <p>ENSMUSG00000022996, ENSMUSG00000062380,<br/> ENSMUSG00000031176, ENSMUSG00000036782,<br/> ENSMUSG00000066357, ENSMUSG00000007815,<br/> ENSMUSG00000042903, ENSMUSG00000025862,<br/> ENSMUSG00000044820, ENSMUSG00000001403,<br/> ENSMUSG00000071470, ENSMUSG00000046240</p> |

|            |                                                              |            |    |                                                                                                                                                                                                                                                                                                                                                                                                                                                                                                                                                                                                                                                                                                                                                                                                                                                                                                                |   |    |                                                                                    |
|------------|--------------------------------------------------------------|------------|----|----------------------------------------------------------------------------------------------------------------------------------------------------------------------------------------------------------------------------------------------------------------------------------------------------------------------------------------------------------------------------------------------------------------------------------------------------------------------------------------------------------------------------------------------------------------------------------------------------------------------------------------------------------------------------------------------------------------------------------------------------------------------------------------------------------------------------------------------------------------------------------------------------------------|---|----|------------------------------------------------------------------------------------|
|            |                                                              |            |    | ENSMUSG00000037544, ENSMUSG00000028678,<br>ENSMUSG00000030867, ENSMUSG00000012443,<br>ENSMUSG00000028068, ENSMUSG00000074476,<br>ENSMUSG00000058290, ENSMUSG00000033952,<br>ENSMUSG00000027496, ENSMUSG00000024791,<br>ENSMUSG00000029377, ENSMUSG00000026605,<br>ENSMUSG00000045328, ENSMUSG00000028873,<br>ENSMUSG00000031004, ENSMUSG00000017146,<br>ENSMUSG00000024056, ENSMUSG00000027469,<br>ENSMUSG00000037725, ENSMUSG00000037628,<br>ENSMUSG00000029414, ENSMUSG00000041324,<br>ENSMUSG00000044201, ENSMUSG00000024014,<br>ENSMUSG00000055170, ENSMUSG00000050957,<br>ENSMUSG00000023505, ENSMUSG00000039748,<br>ENSMUSG00000036223, ENSMUSG00000023015,<br>ENSMUSG00000004296, ENSMUSG00000025001,<br>ENSMUSG00000069910, ENSMUSG00000031898,<br>ENSMUSG00000020415, ENSMUSG00000036986,<br>ENSMUSG00000017861, ENSMUSG00000072082,<br>ENSMUSG00000023940, ENSMUSG00000026779,<br>ENSMUSG00000032218 |   |    |                                                                                    |
| GO:0002282 | microglial cell activation<br>involved in immune<br>response | 0.00907611 | 5  | ENSMUSG00000027995, ENSMUSG00000045322,<br>ENSMUSG00000044583, ENSMUSG00000051498,<br>ENSMUSG00000055994                                                                                                                                                                                                                                                                                                                                                                                                                                                                                                                                                                                                                                                                                                                                                                                                       | 1 | 0  |                                                                                    |
| GO:0007049 | cell cycle                                                   | 1.80E-12   | 83 | ENSMUSG00000017716, ENSMUSG00000015880,<br>ENSMUSG00000022034, ENSMUSG00000007080,                                                                                                                                                                                                                                                                                                                                                                                                                                                                                                                                                                                                                                                                                                                                                                                                                             | 1 | 21 | ENSMUSG00000062380, ENSMUSG00000035486,<br>ENSMUSG00000066357, ENSMUSG00000007815, |

|  |  |  |                                                                                                                                                                                                                                                                                                                                                                                                                                                                                                                                                                                                                                                                                                                                                                                                                                                                                                                                                                                                                                                                                                                                                            |  |                                                                                                                                                                                                                                                                                                                                                                            |
|--|--|--|------------------------------------------------------------------------------------------------------------------------------------------------------------------------------------------------------------------------------------------------------------------------------------------------------------------------------------------------------------------------------------------------------------------------------------------------------------------------------------------------------------------------------------------------------------------------------------------------------------------------------------------------------------------------------------------------------------------------------------------------------------------------------------------------------------------------------------------------------------------------------------------------------------------------------------------------------------------------------------------------------------------------------------------------------------------------------------------------------------------------------------------------------------|--|----------------------------------------------------------------------------------------------------------------------------------------------------------------------------------------------------------------------------------------------------------------------------------------------------------------------------------------------------------------------------|
|  |  |  | ENSMUSG00000050107, ENSMUSG00000045273,<br>ENSMUSG00000027699, ENSMUSG00000024989,<br>ENSMUSG00000020185, ENSMUSG00000068744,<br>ENSMUSG00000019942, ENSMUSG00000006398,<br>ENSMUSG00000002055, ENSMUSG00000033644,<br>ENSMUSG00000027379, ENSMUSG00000046591,<br>ENSMUSG00000027331, ENSMUSG00000027715,<br>ENSMUSG00000036912, ENSMUSG00000042489,<br>ENSMUSG00000026683, ENSMUSG00000001228,<br>ENSMUSG00000026039, ENSMUSG00000041431,<br>ENSMUSG00000040084, ENSMUSG00000027306,<br>ENSMUSG00000037313, ENSMUSG00000024795,<br>ENSMUSG00000002307, ENSMUSG00000078763,<br>ENSMUSG00000048922, ENSMUSG00000051378,<br>ENSMUSG00000002068, ENSMUSG00000020897,<br>ENSMUSG00000017499, ENSMUSG00000071350,<br>ENSMUSG00000037544, ENSMUSG00000028678,<br>ENSMUSG00000030867, ENSMUSG00000012443,<br>ENSMUSG00000028068, ENSMUSG00000074476,<br>ENSMUSG00000058290, ENSMUSG00000033952,<br>ENSMUSG00000027496, ENSMUSG00000024791,<br>ENSMUSG00000029377, ENSMUSG00000026605,<br>ENSMUSG00000074651, ENSMUSG00000005410,<br>ENSMUSG00000026646, ENSMUSG00000045328,<br>ENSMUSG00000028873, ENSMUSG00000031004,<br>ENSMUSG00000017146, ENSMUSG00000024056, |  | ENSMUSG00000044820, ENSMUSG00000032010,<br>ENSMUSG00000031292, ENSMUSG00000042750,<br>ENSMUSG00000020990, ENSMUSG00000034563,<br>ENSMUSG00000022996, ENSMUSG00000025812,<br>ENSMUSG00000036782, ENSMUSG00000031176,<br>ENSMUSG00000032064, ENSMUSG00000042903,<br>ENSMUSG00000025862, ENSMUSG00000046550,<br>ENSMUSG00000001403, ENSMUSG00000046240,<br>ENSMUSG00000071470 |
|--|--|--|------------------------------------------------------------------------------------------------------------------------------------------------------------------------------------------------------------------------------------------------------------------------------------------------------------------------------------------------------------------------------------------------------------------------------------------------------------------------------------------------------------------------------------------------------------------------------------------------------------------------------------------------------------------------------------------------------------------------------------------------------------------------------------------------------------------------------------------------------------------------------------------------------------------------------------------------------------------------------------------------------------------------------------------------------------------------------------------------------------------------------------------------------------|--|----------------------------------------------------------------------------------------------------------------------------------------------------------------------------------------------------------------------------------------------------------------------------------------------------------------------------------------------------------------------------|

|            |                                            |          |    |                                                                                                                                                                                                                                                                                                                                                                                                                                                                                                                                                                                                  |          |     |                                                                                                                                                                          |
|------------|--------------------------------------------|----------|----|--------------------------------------------------------------------------------------------------------------------------------------------------------------------------------------------------------------------------------------------------------------------------------------------------------------------------------------------------------------------------------------------------------------------------------------------------------------------------------------------------------------------------------------------------------------------------------------------------|----------|-----|--------------------------------------------------------------------------------------------------------------------------------------------------------------------------|
|            |                                            |          |    | ENSMUSG00000037725, ENSMUSG00000027469,<br>ENSMUSG00000037628, ENSMUSG00000035683,<br>ENSMUSG00000029414, ENSMUSG00000041324,<br>ENSMUSG00000044201, ENSMUSG00000024014,<br>ENSMUSG00000055170, ENSMUSG00000050957,<br>ENSMUSG00000023505, ENSMUSG00000039748,<br>ENSMUSG00000036223, ENSMUSG0000004296,<br>ENSMUSG00000023015, ENSMUSG00000069910,<br>ENSMUSG00000025001, ENSMUSG00000046179,<br>ENSMUSG00000031898, ENSMUSG00000038943,<br>ENSMUSG00000020415, ENSMUSG00000036986,<br>ENSMUSG00000017861, ENSMUSG00000072082,<br>ENSMUSG00000023940, ENSMUSG00000026779,<br>ENSMUSG00000032218 |          |     |                                                                                                                                                                          |
| GO:0016064 | immunoglobulin mediated<br>immune response | 2.17E-05 | 15 | ENSMUSG00000025498, ENSMUSG00000026656,<br>ENSMUSG00000036905, ENSMUSG00000036887,<br>ENSMUSG00000055994, ENSMUSG00000092005,<br>ENSMUSG00000039748, ENSMUSG00000058715,<br>ENSMUSG00000026573, ENSMUSG00000040627,<br>ENSMUSG00000024371, ENSMUSG00000076612,<br>ENSMUSG00000055172, ENSMUSG00000053175,<br>ENSMUSG00000015947                                                                                                                                                                                                                                                                  | 1        | 0   |                                                                                                                                                                          |
| GO:0065008 | regulation of biological<br>quality        | 1        | 86 | ENSMUSG00000024112, ENSMUSG00000027995,<br>ENSMUSG00000049103, ENSMUSG00000006398,<br>ENSMUSG00000050232, ENSMUSG00000022831,<br>ENSMUSG00000020848, ENSMUSG00000018930,                                                                                                                                                                                                                                                                                                                                                                                                                         | 2.96E-07 | 129 | ENSMUSG00000020123, ENSMUSG00000030302,<br>ENSMUSG00000032547, ENSMUSG00000025889,<br>ENSMUSG00000062515, ENSMUSG00000070570,<br>ENSMUSG00000023328, ENSMUSG00000032511, |

|  |  |  |                                                                                                                                                                                                                                                                                                                                                                                                                                                                                                                                                                                                                                                                                                                                                                                                                                                                                                                                                                                                                                                                                                                                                           |  |  |                                                                                                                                                                                                                                                                                                                                                                                                                                                                                                                                                                                                                                                                                                                                                                                                                                                                                                                                                                                                                                                                                                                                                            |
|--|--|--|-----------------------------------------------------------------------------------------------------------------------------------------------------------------------------------------------------------------------------------------------------------------------------------------------------------------------------------------------------------------------------------------------------------------------------------------------------------------------------------------------------------------------------------------------------------------------------------------------------------------------------------------------------------------------------------------------------------------------------------------------------------------------------------------------------------------------------------------------------------------------------------------------------------------------------------------------------------------------------------------------------------------------------------------------------------------------------------------------------------------------------------------------------------|--|--|------------------------------------------------------------------------------------------------------------------------------------------------------------------------------------------------------------------------------------------------------------------------------------------------------------------------------------------------------------------------------------------------------------------------------------------------------------------------------------------------------------------------------------------------------------------------------------------------------------------------------------------------------------------------------------------------------------------------------------------------------------------------------------------------------------------------------------------------------------------------------------------------------------------------------------------------------------------------------------------------------------------------------------------------------------------------------------------------------------------------------------------------------------|
|  |  |  | ENSMUSG0000000817, ENSMUSG00000025804,<br>ENSMUSG00000020053, ENSMUSG00000051498,<br>ENSMUSG00000020651, ENSMUSG00000000182,<br>ENSMUSG00000037321, ENSMUSG00000026770,<br>ENSMUSG00000026683, ENSMUSG00000045322,<br>ENSMUSG00000027219, ENSMUSG00000002992,<br>ENSMUSG00000055994, ENSMUSG00000030525,<br>ENSMUSG00000040552, ENSMUSG00000035373,<br>ENSMUSG00000038357, ENSMUSG00000037313,<br>ENSMUSG00000000982, ENSMUSG00000001131,<br>ENSMUSG00000003283, ENSMUSG00000078236,<br>ENSMUSG00000022094, ENSMUSG00000030867,<br>ENSMUSG00000028068, ENSMUSG00000038418,<br>ENSMUSG00000022587, ENSMUSG00000058818,<br>ENSMUSG00000044583, ENSMUSG00000029380,<br>ENSMUSG00000033952, ENSMUSG00000021451,<br>ENSMUSG00000027496, ENSMUSG00000038963,<br>ENSMUSG00000029664, ENSMUSG00000040613,<br>ENSMUSG00000038642, ENSMUSG00000026822,<br>ENSMUSG00000058427, ENSMUSG00000029379,<br>ENSMUSG00000031762, ENSMUSG00000071005,<br>ENSMUSG00000031444, ENSMUSG00000024330,<br>ENSMUSG00000074115, ENSMUSG00000035385,<br>ENSMUSG00000045328, ENSMUSG00000028874,<br>ENSMUSG00000030365, ENSMUSG00000024056,<br>ENSMUSG00000027398, ENSMUSG00000079227, |  |  | ENSMUSG00000026715, ENSMUSG00000001865,<br>ENSMUSG00000090877, ENSMUSG00000020524,<br>ENSMUSG00000039952, ENSMUSG00000090639,<br>ENSMUSG00000030865, ENSMUSG00000033615,<br>ENSMUSG00000061393, ENSMUSG00000071317,<br>ENSMUSG00000021909, ENSMUSG00000039278,<br>ENSMUSG00000031209, ENSMUSG00000026874,<br>ENSMUSG00000033208, ENSMUSG00000073940,<br>ENSMUSG00000027513, ENSMUSG00000031760,<br>ENSMUSG00000032839, ENSMUSG00000017697,<br>ENSMUSG00000057606, ENSMUSG00000029193,<br>ENSMUSG00000037010, ENSMUSG00000022878,<br>ENSMUSG00000024027, ENSMUSG00000043943,<br>ENSMUSG00000059201, ENSMUSG00000027470,<br>ENSMUSG00000044885, ENSMUSG00000041616,<br>ENSMUSG00000091898, ENSMUSG00000048455,<br>ENSMUSG00000028427, ENSMUSG00000032315,<br>ENSMUSG00000052305, ENSMUSG00000000049,<br>ENSMUSG00000044338, ENSMUSG00000050164,<br>ENSMUSG00000022040, ENSMUSG00000023013,<br>ENSMUSG00000024990, ENSMUSG00000092137,<br>ENSMUSG00000029205, ENSMUSG00000032356,<br>ENSMUSG00000032083, ENSMUSG00000038775,<br>ENSMUSG00000049281, ENSMUSG00000015405,<br>ENSMUSG00000031425, ENSMUSG00000033965,<br>ENSMUSG00000028573, ENSMUSG00000059741, |
|--|--|--|-----------------------------------------------------------------------------------------------------------------------------------------------------------------------------------------------------------------------------------------------------------------------------------------------------------------------------------------------------------------------------------------------------------------------------------------------------------------------------------------------------------------------------------------------------------------------------------------------------------------------------------------------------------------------------------------------------------------------------------------------------------------------------------------------------------------------------------------------------------------------------------------------------------------------------------------------------------------------------------------------------------------------------------------------------------------------------------------------------------------------------------------------------------|--|--|------------------------------------------------------------------------------------------------------------------------------------------------------------------------------------------------------------------------------------------------------------------------------------------------------------------------------------------------------------------------------------------------------------------------------------------------------------------------------------------------------------------------------------------------------------------------------------------------------------------------------------------------------------------------------------------------------------------------------------------------------------------------------------------------------------------------------------------------------------------------------------------------------------------------------------------------------------------------------------------------------------------------------------------------------------------------------------------------------------------------------------------------------------|

|  |  |  |                                                                                                                                                                                                                                                                                                                                                                                                                                                                                                                                                                           |  |                                                                                                                                                                                                                                                                                                                                                                                                                                                                                                                                                                                                                                                                                                                                                                                                                                                                                                                                                                                                                                                                                                                                                         |
|--|--|--|---------------------------------------------------------------------------------------------------------------------------------------------------------------------------------------------------------------------------------------------------------------------------------------------------------------------------------------------------------------------------------------------------------------------------------------------------------------------------------------------------------------------------------------------------------------------------|--|---------------------------------------------------------------------------------------------------------------------------------------------------------------------------------------------------------------------------------------------------------------------------------------------------------------------------------------------------------------------------------------------------------------------------------------------------------------------------------------------------------------------------------------------------------------------------------------------------------------------------------------------------------------------------------------------------------------------------------------------------------------------------------------------------------------------------------------------------------------------------------------------------------------------------------------------------------------------------------------------------------------------------------------------------------------------------------------------------------------------------------------------------------|
|  |  |  | ENSMUSG00000049608, ENSMUSG00000034459,<br>ENSMUSG00000041324, ENSMUSG00000031765,<br>ENSMUSG00000055170, ENSMUSG00000035042,<br>ENSMUSG00000026573, ENSMUSG0000003555,<br>ENSMUSG00000090125, ENSMUSG00000031891,<br>ENSMUSG00000026981, ENSMUSG00000018486,<br>ENSMUSG00000045471, ENSMUSG00000023078,<br>ENSMUSG00000029371, ENSMUSG00000036986,<br>ENSMUSG00000024401, ENSMUSG00000012428,<br>ENSMUSG00000024339, ENSMUSG00000025746,<br>ENSMUSG00000037868, ENSMUSG00000023940,<br>ENSMUSG00000041347, ENSMUSG00000054136,<br>ENSMUSG00000026177, ENSMUSG00000032218 |  | ENSMUSG00000059481, ENSMUSG00000031997,<br>ENSMUSG0000006235, ENSMUSG00000025265,<br>ENSMUSG00000031980, ENSMUSG00000030730,<br>ENSMUSG00000025810, ENSMUSG00000029368,<br>ENSMUSG00000031757, ENSMUSG00000040488,<br>ENSMUSG00000033831, ENSMUSG00000032366,<br>ENSMUSG00000040147, ENSMUSG00000025270,<br>ENSMUSG00000018893, ENSMUSG00000046714,<br>ENSMUSG00000046402, ENSMUSG00000059898,<br>ENSMUSG00000057182, ENSMUSG00000031844,<br>ENSMUSG00000032010, ENSMUSG00000032554,<br>ENSMUSG00000033577, ENSMUSG0000006269,<br>ENSMUSG00000021319, ENSMUSG00000041688,<br>ENSMUSG00000052698, ENSMUSG00000025037,<br>ENSMUSG00000018566, ENSMUSG00000031996,<br>ENSMUSG00000022996, ENSMUSG00000031489,<br>ENSMUSG00000061086, ENSMUSG00000074336,<br>ENSMUSG00000091971, ENSMUSG00000029019,<br>ENSMUSG00000024386, ENSMUSG00000029361,<br>ENSMUSG00000055609, ENSMUSG00000073465,<br>ENSMUSG00000057880, ENSMUSG00000026532,<br>ENSMUSG00000040752, ENSMUSG00000035458,<br>ENSMUSG00000019326, ENSMUSG00000032570,<br>ENSMUSG0000005373, ENSMUSG00000089996,<br>ENSMUSG00000024039, ENSMUSG00000007815,<br>ENSMUSG00000061068, ENSMUSG00000025991, |
|--|--|--|---------------------------------------------------------------------------------------------------------------------------------------------------------------------------------------------------------------------------------------------------------------------------------------------------------------------------------------------------------------------------------------------------------------------------------------------------------------------------------------------------------------------------------------------------------------------------|--|---------------------------------------------------------------------------------------------------------------------------------------------------------------------------------------------------------------------------------------------------------------------------------------------------------------------------------------------------------------------------------------------------------------------------------------------------------------------------------------------------------------------------------------------------------------------------------------------------------------------------------------------------------------------------------------------------------------------------------------------------------------------------------------------------------------------------------------------------------------------------------------------------------------------------------------------------------------------------------------------------------------------------------------------------------------------------------------------------------------------------------------------------------|

|            |                      |          |    |                                                                                                                                                                                                                                                                                                                                                                                                                                                                                                                                                                                                                                                                                                                                                        |   |   |                                                                                                                                                                                                                                                                                                                                                                            |
|------------|----------------------|----------|----|--------------------------------------------------------------------------------------------------------------------------------------------------------------------------------------------------------------------------------------------------------------------------------------------------------------------------------------------------------------------------------------------------------------------------------------------------------------------------------------------------------------------------------------------------------------------------------------------------------------------------------------------------------------------------------------------------------------------------------------------------------|---|---|----------------------------------------------------------------------------------------------------------------------------------------------------------------------------------------------------------------------------------------------------------------------------------------------------------------------------------------------------------------------------|
|            |                      |          |    |                                                                                                                                                                                                                                                                                                                                                                                                                                                                                                                                                                                                                                                                                                                                                        |   |   | ENSMUSG00000053093, ENSMUSG00000000889,<br>ENSMUSG00000038239, ENSMUSG00000027887,<br>ENSMUSG00000031144, ENSMUSG00000032081,<br>ENSMUSG00000045103, ENSMUSG00000069441,<br>ENSMUSG00000024653, ENSMUSG00000030747,<br>ENSMUSG00000058914, ENSMUSG00000028167,<br>ENSMUSG00000056978, ENSMUSG00000022206,<br>ENSMUSG00000037624, ENSMUSG00000020532,<br>ENSMUSG00000010047 |
| GO:0045321 | leukocyte activation | 2.12E-12 | 47 | ENSMUSG00000060802, ENSMUSG00000040528,<br>ENSMUSG00000074148, ENSMUSG00000027995,<br>ENSMUSG00000035673, ENSMUSG00000071005,<br>ENSMUSG00000071068, ENSMUSG00000018899,<br>ENSMUSG00000053977, ENSMUSG00000028072,<br>ENSMUSG00000062007, ENSMUSG00000030786,<br>ENSMUSG00000034652, ENSMUSG00000051498,<br>ENSMUSG00000059089, ENSMUSG00000028362,<br>ENSMUSG00000055170, ENSMUSG00000068227,<br>ENSMUSG00000045322, ENSMUSG00000027843,<br>ENSMUSG0000001444, ENSMUSG00000040751,<br>ENSMUSG00000055994, ENSMUSG00000035042,<br>ENSMUSG00000039748, ENSMUSG00000002699,<br>ENSMUSG00000035186, ENSMUSG00000058715,<br>ENSMUSG00000030149, ENSMUSG00000030525,<br>ENSMUSG00000026573, ENSMUSG00000040627,<br>ENSMUSG00000000982, ENSMUSG00000004296, | 1 | 4 | ENSMUSG00000025889, ENSMUSG00000061311,<br>ENSMUSG00000010047, ENSMUSG00000017697                                                                                                                                                                                                                                                                                          |



|            |                                                      |          |    |                                                                                                                                                                                                                                                                                                                                                                                                                                                                                                |   |   |                                                                                |
|------------|------------------------------------------------------|----------|----|------------------------------------------------------------------------------------------------------------------------------------------------------------------------------------------------------------------------------------------------------------------------------------------------------------------------------------------------------------------------------------------------------------------------------------------------------------------------------------------------|---|---|--------------------------------------------------------------------------------|
|            |                                                      |          |    | ENSMUSG00000053175, ENSMUSG00000025001, ENSMUSG00000022901, ENSMUSG00000050241, ENSMUSG00000029075, ENSMUSG00000044827, ENSMUSG00000034116, ENSMUSG00000038418, ENSMUSG00000058818, ENSMUSG00000044583, ENSMUSG00000025746, ENSMUSG00000049109, ENSMUSG00000026177                                                                                                                                                                                                                             |   |   |                                                                                |
| GO:0032944 | regulation of mononuclear cell proliferation         | 3.53E-06 | 24 | ENSMUSG00000016496, ENSMUSG00000044701, ENSMUSG00000055170, ENSMUSG00000073412, ENSMUSG00000027843, ENSMUSG00000035042, ENSMUSG00000026573, ENSMUSG00000049103, ENSMUSG00000016529, ENSMUSG00000004296, ENSMUSG00000000791, ENSMUSG00000022901, ENSMUSG00000026656, ENSMUSG00000029075, ENSMUSG00000075122, ENSMUSG00000016498, ENSMUSG00000030365, ENSMUSG00000026011, ENSMUSG00000024397, ENSMUSG00000025746, ENSMUSG00000020053, ENSMUSG00000027398, ENSMUSG00000031551, ENSMUSG00000026770 | 1 | 4 | ENSMUSG00000063632, ENSMUSG00000024653, ENSMUSG00000026532, ENSMUSG00000017697 |
| GO:0042108 | positive regulation of cytokine biosynthetic process | 5.60E-05 | 14 | ENSMUSG00000044701, ENSMUSG00000055170, ENSMUSG00000028602, ENSMUSG00000027995, ENSMUSG00000045322, ENSMUSG00000044827, ENSMUSG00000024401, ENSMUSG00000029377, ENSMUSG00000044583, ENSMUSG00000049103, ENSMUSG00000051498, ENSMUSG00000027398, ENSMUSG00000018899, ENSMUSG00000053175                                                                                                                                                                                                         | 1 | 0 |                                                                                |

|            |                                                                                                                                                  |                 |    |                                                                                                                                                                                                                                                                                                                                                                                                                                                                                                                                         |   |    |                                                                                                                                                                                                       |
|------------|--------------------------------------------------------------------------------------------------------------------------------------------------|-----------------|----|-----------------------------------------------------------------------------------------------------------------------------------------------------------------------------------------------------------------------------------------------------------------------------------------------------------------------------------------------------------------------------------------------------------------------------------------------------------------------------------------------------------------------------------------|---|----|-------------------------------------------------------------------------------------------------------------------------------------------------------------------------------------------------------|
| GO:0002824 | positive regulation of adaptive immune response based on somatic recombination of immune receptors built from immunoglobulin superfamily domains | 4.88E-07        | 16 | ENSMUSG00000060802, ENSMUSG00000055994, ENSMUSG00000058715, ENSMUSG00000026573, ENSMUSG00000061232, ENSMUSG00000049103, ENSMUSG0000004296, ENSMUSG00000000791, ENSMUSG00000015947, ENSMUSG00000073411, ENSMUSG00000024401, ENSMUSG00000024339, ENSMUSG00000030895, ENSMUSG00000037321, ENSMUSG00000026177, ENSMUSG00000067212                                                                                                                                                                                                           | 1 | 2  | ENSMUSG00000090877, ENSMUSG00000017697                                                                                                                                                                |
| GO:0032760 | positive regulation of tumor necrosis factor production                                                                                          | 0.00040323<br>5 | 10 | ENSMUSG00000055170, ENSMUSG00000027995, ENSMUSG00000045322, ENSMUSG00000018930, ENSMUSG00000055994, ENSMUSG00000058715, ENSMUSG00000051439, ENSMUSG0000004296, ENSMUSG00000079227, ENSMUSG00000000982                                                                                                                                                                                                                                                                                                                                   | 1 | 0  |                                                                                                                                                                                                       |
| GO:0071345 | cellular response to cytokine stimulus                                                                                                           | 5.00E-25        | 51 | ENSMUSG00000078922, ENSMUSG00000029377, ENSMUSG00000066861, ENSMUSG00000029298, ENSMUSG00000043263, ENSMUSG00000049103, ENSMUSG00000018899, ENSMUSG00000035385, ENSMUSG00000078853, ENSMUSG00000026073, ENSMUSG00000054203, ENSMUSG00000073489, ENSMUSG00000037860, ENSMUSG00000039997, ENSMUSG00000040253, ENSMUSG00000026535, ENSMUSG00000025804, ENSMUSG00000040264, ENSMUSG00000027398, ENSMUSG00000045932, ENSMUSG00000054072, ENSMUSG00000034459, ENSMUSG00000026770, ENSMUSG00000055170, ENSMUSG00000038037, ENSMUSG00000068227, | 1 | 10 | ENSMUSG00000031134, ENSMUSG00000042812, ENSMUSG0000006235, ENSMUSG00000059201, ENSMUSG00000031760, ENSMUSG00000024028, ENSMUSG00000010051, ENSMUSG00000027820, ENSMUSG00000022878, ENSMUSG00000010047 |

|            |                     |   |    |                                                                                                                                                                                                                                                                                                                                                                                                                                                                                                                                                                                                            |             |    |                                                                                                                                                                                                                                                                                                                                                                                                                                                                                                                                                                                                            |
|------------|---------------------|---|----|------------------------------------------------------------------------------------------------------------------------------------------------------------------------------------------------------------------------------------------------------------------------------------------------------------------------------------------------------------------------------------------------------------------------------------------------------------------------------------------------------------------------------------------------------------------------------------------------------------|-------------|----|------------------------------------------------------------------------------------------------------------------------------------------------------------------------------------------------------------------------------------------------------------------------------------------------------------------------------------------------------------------------------------------------------------------------------------------------------------------------------------------------------------------------------------------------------------------------------------------------------------|
|            |                     |   |    | <p>ENSMUSG00000028269, ENSMUSG00000026068,<br/> ENSMUSG00000079363, ENSMUSG00000025492,<br/> ENSMUSG00000026104, ENSMUSG00000079362,<br/> ENSMUSG00000071714, ENSMUSG00000026573,<br/> ENSMUSG00000028270, ENSMUSG00000004296,<br/> ENSMUSG00000000791, ENSMUSG00000049734,<br/> ENSMUSG00000030793, ENSMUSG00000023078,<br/> ENSMUSG00000073555, ENSMUSG00000074896,<br/> ENSMUSG00000028268, ENSMUSG00000024401,<br/> ENSMUSG00000034438, ENSMUSG00000038418,<br/> ENSMUSG00000054588, ENSMUSG00000058818,<br/> ENSMUSG00000026580, ENSMUSG00000025746,<br/> ENSMUSG00000071713</p>                      |             |    |                                                                                                                                                                                                                                                                                                                                                                                                                                                                                                                                                                                                            |
| GO:0022610 | biological adhesion | 1 | 34 | <p>ENSMUSG00000022026, ENSMUSG00000048534,<br/> ENSMUSG00000029298, ENSMUSG00000033880,<br/> ENSMUSG00000017146, ENSMUSG00000047230,<br/> ENSMUSG00000030786, ENSMUSG00000028217,<br/> ENSMUSG00000040253, ENSMUSG00000004707,<br/> ENSMUSG00000001123, ENSMUSG00000027398,<br/> ENSMUSG00000029816, ENSMUSG00000025473,<br/> ENSMUSG00000028269, ENSMUSG00000027322,<br/> ENSMUSG00000079362, ENSMUSG00000035042,<br/> ENSMUSG00000053475, ENSMUSG00000035493,<br/> ENSMUSG00000032322, ENSMUSG00000030077,<br/> ENSMUSG00000028270, ENSMUSG00000029304,<br/> ENSMUSG00000020310, ENSMUSG00000030474,</p> | 0.000294432 | 53 | <p>ENSMUSG00000039013, ENSMUSG00000025810,<br/> ENSMUSG00000033327, ENSMUSG00000032452,<br/> ENSMUSG00000074505, ENSMUSG00000022491,<br/> ENSMUSG00000052911, ENSMUSG00000023328,<br/> ENSMUSG00000008153, ENSMUSG00000057454,<br/> ENSMUSG00000061928, ENSMUSG00000031881,<br/> ENSMUSG00000031841, ENSMUSG00000059898,<br/> ENSMUSG00000039952, ENSMUSG00000043719,<br/> ENSMUSG00000071317, ENSMUSG00000006457,<br/> ENSMUSG00000052698, ENSMUSG00000032332,<br/> ENSMUSG00000030607, ENSMUSG00000042451,<br/> ENSMUSG00000031253, ENSMUSG00000001300,<br/> ENSMUSG00000035776, ENSMUSG00000026413,</p> |

|            |                                     |                 |    |                                                                                                                                                                                                                                                                                        |   |    |                                                                                                                                                                                                                                                                                                                                                                                                                                                                                                                                                            |
|------------|-------------------------------------|-----------------|----|----------------------------------------------------------------------------------------------------------------------------------------------------------------------------------------------------------------------------------------------------------------------------------------|---|----|------------------------------------------------------------------------------------------------------------------------------------------------------------------------------------------------------------------------------------------------------------------------------------------------------------------------------------------------------------------------------------------------------------------------------------------------------------------------------------------------------------------------------------------------------------|
|            |                                     |                 |    | ENSMUSG00000032783, ENSMUSG00000037440, ENSMUSG00000026582, ENSMUSG00000079597, ENSMUSG00000028268, ENSMUSG00000024401, ENSMUSG00000026580, ENSMUSG00000021451                                                                                                                         |   |    | ENSMUSG00000017697, ENSMUSG00000036867, ENSMUSG00000044322, ENSMUSG00000046240, ENSMUSG00000047216, ENSMUSG00000038119, ENSMUSG00000032076, ENSMUSG00000091345, ENSMUSG00000042812, ENSMUSG00000004892, ENSMUSG00000059201, ENSMUSG00000019326, ENSMUSG00000032570, ENSMUSG00000001946, ENSMUSG00000056632, ENSMUSG00000007815, ENSMUSG00000035459, ENSMUSG00000059327, ENSMUSG00000025812, ENSMUSG00000030606, ENSMUSG00000069441, ENSMUSG00000048758, ENSMUSG00000031377, ENSMUSG00000031355, ENSMUSG00000052374, ENSMUSG00000031980, ENSMUSG00000034774 |
| GO:0031343 | positive regulation of cell killing | 1.08E-07        | 14 | ENSMUSG00000073411, ENSMUSG00000005696, ENSMUSG00000055170, ENSMUSG00000060802, ENSMUSG00000050241, ENSMUSG00000030124, ENSMUSG00000030149, ENSMUSG00000024339, ENSMUSG00000026573, ENSMUSG00000061232, ENSMUSG00000079227, ENSMUSG00000004296, ENSMUSG00000037321, ENSMUSG00000067212 | 1 | 2  | ENSMUSG00000090877, ENSMUSG00000032076                                                                                                                                                                                                                                                                                                                                                                                                                                                                                                                     |
| GO:0009605 | response to external stimulus       | 0.00103419<br>1 | 51 | ENSMUSG00000024079, ENSMUSG00000027995, ENSMUSG00000035352, ENSMUSG00000048534, ENSMUSG00000058427, ENSMUSG00000029379, ENSMUSG00000071005, ENSMUSG00000009185, ENSMUSG00000029811, ENSMUSG00000049103,                                                                                | 1 | 28 | ENSMUSG00000031380, ENSMUSG00000009471, ENSMUSG00000030302, ENSMUSG00000042812, ENSMUSG00000025810, ENSMUSG00000032547, ENSMUSG00000029368, ENSMUSG00000059201, ENSMUSG00000062380, ENSMUSG00000051596,                                                                                                                                                                                                                                                                                                                                                    |

|            |                           |                 |    |                                                                                                                                                                                                                                                                                                                                                                                                                                                                                                                                                                                                                                                                                                                                                                                                                                                                                                                                                               |            |    |                                                                                                                                                                                                                                                                                                                                                                                                                       |
|------------|---------------------------|-----------------|----|---------------------------------------------------------------------------------------------------------------------------------------------------------------------------------------------------------------------------------------------------------------------------------------------------------------------------------------------------------------------------------------------------------------------------------------------------------------------------------------------------------------------------------------------------------------------------------------------------------------------------------------------------------------------------------------------------------------------------------------------------------------------------------------------------------------------------------------------------------------------------------------------------------------------------------------------------------------|------------|----|-----------------------------------------------------------------------------------------------------------------------------------------------------------------------------------------------------------------------------------------------------------------------------------------------------------------------------------------------------------------------------------------------------------------------|
|            |                           |                 |    | <p>ENSMUSG00000079563, ENSMUSG00000074115,<br/> ENSMUSG00000027199, ENSMUSG00000035385,<br/> ENSMUSG00000017724, ENSMUSG00000050232,<br/> ENSMUSG00000026166, ENSMUSG00000028072,<br/> ENSMUSG00000030413, ENSMUSG00000024842,<br/> ENSMUSG00000018930, ENSMUSG00000030786,<br/> ENSMUSG00000026222, ENSMUSG00000040296,<br/> ENSMUSG00000000247, ENSMUSG00000025804,<br/> ENSMUSG00000027398, ENSMUSG00000051498,<br/> ENSMUSG00000034855, ENSMUSG00000025473,<br/> ENSMUSG00000029005, ENSMUSG00000055170,<br/> ENSMUSG00000018920, ENSMUSG00000026104,<br/> ENSMUSG00000055994, ENSMUSG00000035042,<br/> ENSMUSG00000056529, ENSMUSG00000058715,<br/> ENSMUSG00000070691, ENSMUSG00000030525,<br/> ENSMUSG00000040552, ENSMUSG00000026573,<br/> ENSMUSG00000030077, ENSMUSG00000035373,<br/> ENSMUSG00000000982, ENSMUSG00000029304,<br/> ENSMUSG00000044827, ENSMUSG00000023078,<br/> ENSMUSG00000037868, ENSMUSG00000029380,<br/> ENSMUSG00000079700</p> |            |    | <p>ENSMUSG00000052911, ENSMUSG00000024039,<br/> ENSMUSG00000026715, ENSMUSG00000020884,<br/> ENSMUSG00000046402, ENSMUSG00000041012,<br/> ENSMUSG00000031844, ENSMUSG00000041688,<br/> ENSMUSG00000026874, ENSMUSG00000023013,<br/> ENSMUSG00000024990, ENSMUSG00000029205,<br/> ENSMUSG00000031780, ENSMUSG00000023235,<br/> ENSMUSG00000029193, ENSMUSG00000060180,<br/> ENSMUSG00000073465, ENSMUSG00000040412</p> |
| GO:0042116 | macrophage activation     | 0.00406468<br>9 | 8  | <p>ENSMUSG00000027995, ENSMUSG00000045322,<br/> ENSMUSG00000044827, ENSMUSG00000055994,<br/> ENSMUSG00000035673, ENSMUSG00000044583,<br/> ENSMUSG00000051498, ENSMUSG00000026177</p>                                                                                                                                                                                                                                                                                                                                                                                                                                                                                                                                                                                                                                                                                                                                                                          | 1          | 0  |                                                                                                                                                                                                                                                                                                                                                                                                                       |
| GO:0042180 | cellular ketone metabolic | 1               | 13 | <p>ENSMUSG00000030268, ENSMUSG00000038963,</p>                                                                                                                                                                                                                                                                                                                                                                                                                                                                                                                                                                                                                                                                                                                                                                                                                                                                                                                | 0.00032696 | 55 | <p>ENSMUSG00000037686, ENSMUSG00000032263,</p>                                                                                                                                                                                                                                                                                                                                                                        |

process

ENSMUSG0000003484, ENSMUSG00000037440,  
ENSMUSG00000017146, ENSMUSG00000039519,  
ENSMUSG00000050370, ENSMUSG00000021266,  
ENSMUSG00000018907, ENSMUSG00000027199,  
ENSMUSG00000022126, ENSMUSG00000031551,  
ENSMUSG00000020010

ENSMUSG00000033327, ENSMUSG00000032262,  
ENSMUSG00000025889, ENSMUSG00000062515,  
ENSMUSG00000020182, ENSMUSG00000046402,  
ENSMUSG00000002588, ENSMUSG00000002010,  
ENSMUSG00000004038, ENSMUSG00000032310,  
ENSMUSG00000032418, ENSMUSG00000027513,  
ENSMUSG00000032807, ENSMUSG00000032279,  
ENSMUSG00000067653, ENSMUSG00000019278,  
ENSMUSG00000074183, ENSMUSG00000037071,  
ENSMUSG00000029361, ENSMUSG00000032348,  
ENSMUSG00000025202, ENSMUSG00000025153,  
ENSMUSG00000057880, ENSMUSG00000073424,  
ENSMUSG00000002769, ENSMUSG00000022878,  
ENSMUSG00000078597, ENSMUSG00000030399,  
ENSMUSG00000032349, ENSMUSG00000059201,  
ENSMUSG00000066072, ENSMUSG00000021622,  
ENSMUSG00000004885, ENSMUSG00000024039,  
ENSMUSG00000030972, ENSMUSG00000058135,  
ENSMUSG00000000168, ENSMUSG00000031299,  
ENSMUSG00000025991, ENSMUSG00000032315,  
ENSMUSG00000027820, ENSMUSG00000090150,  
ENSMUSG00000022040, ENSMUSG00000075217,  
ENSMUSG00000028167, ENSMUSG00000031425,  
ENSMUSG00000024892, ENSMUSG00000029695,  
ENSMUSG00000041220, ENSMUSG00000035202,  
ENSMUSG00000050195, ENSMUSG00000020532,

|            |                                                                          |                 |    |                                                                                                                                                                                                                                                                                                                                                                                                                                                                                                                                                                                                                                                                                                                                                                                                                                                                                           |   |    |                                                                                                                                                                                                                                                                                                                                                                                                                                                                                                                                                                                                                                                                                                        |
|------------|--------------------------------------------------------------------------|-----------------|----|-------------------------------------------------------------------------------------------------------------------------------------------------------------------------------------------------------------------------------------------------------------------------------------------------------------------------------------------------------------------------------------------------------------------------------------------------------------------------------------------------------------------------------------------------------------------------------------------------------------------------------------------------------------------------------------------------------------------------------------------------------------------------------------------------------------------------------------------------------------------------------------------|---|----|--------------------------------------------------------------------------------------------------------------------------------------------------------------------------------------------------------------------------------------------------------------------------------------------------------------------------------------------------------------------------------------------------------------------------------------------------------------------------------------------------------------------------------------------------------------------------------------------------------------------------------------------------------------------------------------------------------|
|            |                                                                          |                 |    |                                                                                                                                                                                                                                                                                                                                                                                                                                                                                                                                                                                                                                                                                                                                                                                                                                                                                           |   |    | ENSMUSG00000027380                                                                                                                                                                                                                                                                                                                                                                                                                                                                                                                                                                                                                                                                                     |
| GO:0051240 | positive regulation of multicellular organismal process                  | 0.00024721<br>5 | 43 | ENSMUSG00000027995, ENSMUSG00000029377, ENSMUSG00000049103, ENSMUSG00000051439, ENSMUSG00000035385, ENSMUSG00000032691, ENSMUSG00000019942, ENSMUSG00000028072, ENSMUSG00000018930, ENSMUSG00000040296, ENSMUSG00000020053, ENSMUSG00000027398, ENSMUSG00000079227, ENSMUSG00000031551, ENSMUSG00000041324, ENSMUSG00000025473, ENSMUSG00000055170, ENSMUSG00000045322, ENSMUSG00000055994, ENSMUSG00000035042, ENSMUSG00000058715, ENSMUSG00000071552, ENSMUSG00000030525, ENSMUSG00000030149, ENSMUSG00000040552, ENSMUSG00000041431, ENSMUSG00000026573, ENSMUSG00000000982, ENSMUSG00000029304, ENSMUSG0000004296, ENSMUSG00000053175, ENSMUSG00000000791, ENSMUSG00000025498, ENSMUSG00000050241, ENSMUSG00000041515, ENSMUSG00000030793, ENSMUSG00000045471, ENSMUSG00000024401, ENSMUSG00000021765, ENSMUSG00000024397, ENSMUSG00000025746, ENSMUSG00000044583, ENSMUSG00000026177 | 1 | 34 | ENSMUSG00000031380, ENSMUSG00000020123, ENSMUSG00000030730, ENSMUSG00000029368, ENSMUSG00000032366, ENSMUSG00000025889, ENSMUSG00000032511, ENSMUSG00000029236, ENSMUSG00000020524, ENSMUSG00000090639, ENSMUSG00000032554, ENSMUSG00000061393, ENSMUSG00000026874, ENSMUSG00000039004, ENSMUSG00000033208, ENSMUSG00000022996, ENSMUSG00000031489, ENSMUSG00000017697, ENSMUSG00000063632, ENSMUSG00000036867, ENSMUSG00000029361, ENSMUSG00000037010, ENSMUSG00000024027, ENSMUSG00000022878, ENSMUSG00000022868, ENSMUSG00000027470, ENSMUSG00000027077, ENSMUSG00000025991, ENSMUSG00000000889, ENSMUSG00000000049, ENSMUSG00000062778, ENSMUSG00000049281, ENSMUSG00000059481, ENSMUSG00000031980 |
| GO:0052255 | modulation by organism of defense response of other organism involved in | 0.00351362<br>7 | 5  | ENSMUSG00000027995, ENSMUSG00000045322, ENSMUSG00000044583, ENSMUSG00000051498, ENSMUSG00000055994                                                                                                                                                                                                                                                                                                                                                                                                                                                                                                                                                                                                                                                                                                                                                                                        | 1 | 0  |                                                                                                                                                                                                                                                                                                                                                                                                                                                                                                                                                                                                                                                                                                        |

|            |                                       |   |    |                                                                                                                                                                                                                                                                                                                                 |             |    |                                                                                                                                                                                                                                                                                                                                                                                                                                                                                                                                                                                                                                                                                   |
|------------|---------------------------------------|---|----|---------------------------------------------------------------------------------------------------------------------------------------------------------------------------------------------------------------------------------------------------------------------------------------------------------------------------------|-------------|----|-----------------------------------------------------------------------------------------------------------------------------------------------------------------------------------------------------------------------------------------------------------------------------------------------------------------------------------------------------------------------------------------------------------------------------------------------------------------------------------------------------------------------------------------------------------------------------------------------------------------------------------------------------------------------------------|
|            | sybiotic interaction                  |   |    |                                                                                                                                                                                                                                                                                                                                 |             |    |                                                                                                                                                                                                                                                                                                                                                                                                                                                                                                                                                                                                                                                                                   |
| GO:0032787 | monocarboxylic acid metabolic process | 1 | 7  | ENSMUSG00000050370, ENSMUSG00000003484, ENSMUSG00000018907, ENSMUSG00000017146, ENSMUSG00000022126, ENSMUSG00000031551, ENSMUSG00000039519                                                                                                                                                                                      | 0.001591895 | 33 | ENSMUSG00000033327, ENSMUSG00000032262, ENSMUSG00000025889, ENSMUSG00000062515, ENSMUSG00000046402, ENSMUSG00000032310, ENSMUSG00000027513, ENSMUSG00000032807, ENSMUSG00000067653, ENSMUSG00000037071, ENSMUSG00000025153, ENSMUSG00000025202, ENSMUSG00000073424, ENSMUSG00000078597, ENSMUSG00000022878, ENSMUSG00000059201, ENSMUSG00000032349, ENSMUSG00000066072, ENSMUSG0000004885, ENSMUSG00000030972, ENSMUSG00000031299, ENSMUSG00000000168, ENSMUSG00000032315, ENSMUSG00000022040, ENSMUSG00000090150, ENSMUSG00000075217, ENSMUSG00000028167, ENSMUSG00000031425, ENSMUSG00000024892, ENSMUSG00000041220, ENSMUSG00000050195, ENSMUSG00000020532, ENSMUSG00000027380 |
| GO:0007155 | cell adhesion                         | 1 | 28 | ENSMUSG00000027322, ENSMUSG00000022026, ENSMUSG00000048534, ENSMUSG00000035493, ENSMUSG00000053475, ENSMUSG00000035042, ENSMUSG00000032322, ENSMUSG00000030077, ENSMUSG00000020310, ENSMUSG00000029304, ENSMUSG00000030474, ENSMUSG00000032783, ENSMUSG00000033880, ENSMUSG00000026582, ENSMUSG00000037440, ENSMUSG00000017146, | 0.000215038 | 53 | ENSMUSG00000039013, ENSMUSG00000025810, ENSMUSG00000033327, ENSMUSG00000032452, ENSMUSG00000074505, ENSMUSG00000022491, ENSMUSG00000052911, ENSMUSG00000023328, ENSMUSG00000008153, ENSMUSG00000057454, ENSMUSG00000061928, ENSMUSG00000031881, ENSMUSG00000031841, ENSMUSG00000059898, ENSMUSG00000039952, ENSMUSG00000043719,                                                                                                                                                                                                                                                                                                                                                   |



|            |                                      |                 |    |                                                                                                                                                                                                                                                                                      |   |   |                                                                                                                                                                                                                                                                                                                                                                                                                                                                                                                                                                                                                                                                                                                                                                                                                          |
|------------|--------------------------------------|-----------------|----|--------------------------------------------------------------------------------------------------------------------------------------------------------------------------------------------------------------------------------------------------------------------------------------|---|---|--------------------------------------------------------------------------------------------------------------------------------------------------------------------------------------------------------------------------------------------------------------------------------------------------------------------------------------------------------------------------------------------------------------------------------------------------------------------------------------------------------------------------------------------------------------------------------------------------------------------------------------------------------------------------------------------------------------------------------------------------------------------------------------------------------------------------|
|            |                                      |                 |    | ENSMUSG00000047230, ENSMUSG00000030786,<br>ENSMUSG00000079597, ENSMUSG00000024401,<br>ENSMUSG00000028217, ENSMUSG00000004707,<br>ENSMUSG00000026580, ENSMUSG00000001123,<br>ENSMUSG00000027398, ENSMUSG00000029816,<br>ENSMUSG00000021451, ENSMUSG00000025473                        |   |   | ENSMUSG00000071317, ENSMUSG00000006457,<br>ENSMUSG00000052698, ENSMUSG00000032332,<br>ENSMUSG00000030607, ENSMUSG00000042451,<br>ENSMUSG00000031253, ENSMUSG00000001300,<br>ENSMUSG00000035776, ENSMUSG00000026413,<br>ENSMUSG00000017697, ENSMUSG00000036867,<br>ENSMUSG00000044322, ENSMUSG00000046240,<br>ENSMUSG00000047216, ENSMUSG00000038119,<br>ENSMUSG00000032076, ENSMUSG00000091345,<br>ENSMUSG00000042812, ENSMUSG00000004892,<br>ENSMUSG00000059201, ENSMUSG00000019326,<br>ENSMUSG00000032570, ENSMUSG00000001946,<br>ENSMUSG00000056632, ENSMUSG00000007815,<br>ENSMUSG00000035459, ENSMUSG00000059327,<br>ENSMUSG00000025812, ENSMUSG00000030606,<br>ENSMUSG00000069441, ENSMUSG00000048758,<br>ENSMUSG00000031377, ENSMUSG00000031355,<br>ENSMUSG00000052374, ENSMUSG00000031980,<br>ENSMUSG00000034774 |
| GO:0050921 | positive regulation of<br>chemotaxis | 0.00378420<br>2 | 13 | ENSMUSG00000023913, ENSMUSG00000023078,<br>ENSMUSG00000018930, ENSMUSG00000035042,<br>ENSMUSG00000071005, ENSMUSG00000024397,<br>ENSMUSG00000026573, ENSMUSG00000040552,<br>ENSMUSG00000035373, ENSMUSG00000049103,<br>ENSMUSG00000035385, ENSMUSG00000000982,<br>ENSMUSG00000034855 | 1 | 3 | ENSMUSG00000031380, ENSMUSG00000031841,<br>ENSMUSG00000026874                                                                                                                                                                                                                                                                                                                                                                                                                                                                                                                                                                                                                                                                                                                                                            |

|            |                                                             |                 |    |                                                                                                                                                                                                                                                                                                                                                                                                                                                                                                             |   |   |                                                                                                                              |
|------------|-------------------------------------------------------------|-----------------|----|-------------------------------------------------------------------------------------------------------------------------------------------------------------------------------------------------------------------------------------------------------------------------------------------------------------------------------------------------------------------------------------------------------------------------------------------------------------------------------------------------------------|---|---|------------------------------------------------------------------------------------------------------------------------------|
| GO:004419  | interspecies interaction<br>between organisms               | 8.84E-08        | 21 | ENSMUSG00000027995, ENSMUSG00000028269,<br>ENSMUSG00000045322, ENSMUSG00000079362,<br>ENSMUSG00000035042, ENSMUSG00000055994,<br>ENSMUSG00000028270, ENSMUSG00000029298,<br>ENSMUSG00000038357, ENSMUSG00000000982,<br>ENSMUSG00000018930, ENSMUSG00000036986,<br>ENSMUSG00000028268, ENSMUSG00000040253,<br>ENSMUSG00000024339, ENSMUSG00000044583,<br>ENSMUSG00000051498, ENSMUSG00000037321,<br>ENSMUSG00000079227, ENSMUSG00000027514,<br>ENSMUSG00000034459                                            | 1 | 6 | ENSMUSG00000039952, ENSMUSG00000029368,<br>ENSMUSG00000006235, ENSMUSG00000032216,<br>ENSMUSG00000010047, ENSMUSG00000015405 |
| GO:0002443 | leukocyte mediated<br>immunity                              | 1.05E-08        | 23 | ENSMUSG00000036905, ENSMUSG00000040528,<br>ENSMUSG00000036887, ENSMUSG00000055994,<br>ENSMUSG00000040751, ENSMUSG00000092005,<br>ENSMUSG00000039748, ENSMUSG00000058715,<br>ENSMUSG00000026573, ENSMUSG00000040627,<br>ENSMUSG00000024371, ENSMUSG00000000982,<br>ENSMUSG00000015437, ENSMUSG00000053977,<br>ENSMUSG00000076612, ENSMUSG00000055172,<br>ENSMUSG00000053175, ENSMUSG00000015947,<br>ENSMUSG00000025498, ENSMUSG00000026656,<br>ENSMUSG00000058818, ENSMUSG00000034652,<br>ENSMUSG00000026177 | 1 | 2 | ENSMUSG00000000889, ENSMUSG00000026874                                                                                       |
| GO:0002758 | innate immune<br>response-activating signal<br>transduction | 0.00076508<br>8 | 10 | ENSMUSG00000027995, ENSMUSG00000050241,<br>ENSMUSG00000045322, ENSMUSG00000030413,<br>ENSMUSG00000055994, ENSMUSG00000030149,                                                                                                                                                                                                                                                                                                                                                                               | 1 | 0 |                                                                                                                              |

|            |                                  |   |    |                                                                                                                                                                                                                                                                                                                                                                                                                                                                                                                                                                                                                                                                                                                                                                                                                                                                                                                                                                               |             |     |                                                                                                                                                                                                                                                                                                                                                                                                                                                                                                                                                                                                                                                                                                                                                                                                                                                                                                                                                                                                                                                                                                                   |
|------------|----------------------------------|---|----|-------------------------------------------------------------------------------------------------------------------------------------------------------------------------------------------------------------------------------------------------------------------------------------------------------------------------------------------------------------------------------------------------------------------------------------------------------------------------------------------------------------------------------------------------------------------------------------------------------------------------------------------------------------------------------------------------------------------------------------------------------------------------------------------------------------------------------------------------------------------------------------------------------------------------------------------------------------------------------|-------------|-----|-------------------------------------------------------------------------------------------------------------------------------------------------------------------------------------------------------------------------------------------------------------------------------------------------------------------------------------------------------------------------------------------------------------------------------------------------------------------------------------------------------------------------------------------------------------------------------------------------------------------------------------------------------------------------------------------------------------------------------------------------------------------------------------------------------------------------------------------------------------------------------------------------------------------------------------------------------------------------------------------------------------------------------------------------------------------------------------------------------------------|
|            |                                  |   |    | ENSMUSG00000044583, ENSMUSG000000051498,<br>ENSMUSG000000025473, ENSMUSG000000022901                                                                                                                                                                                                                                                                                                                                                                                                                                                                                                                                                                                                                                                                                                                                                                                                                                                                                          |             |     |                                                                                                                                                                                                                                                                                                                                                                                                                                                                                                                                                                                                                                                                                                                                                                                                                                                                                                                                                                                                                                                                                                                   |
| GO:0044281 | small molecule metabolic process | 1 | 42 | ENSMUSG000000038963, ENSMUSG000000040613,<br>ENSMUSG000000026628, ENSMUSG000000003484,<br>ENSMUSG000000066861, ENSMUSG000000005667,<br>ENSMUSG000000021266, ENSMUSG000000018907,<br>ENSMUSG000000074115, ENSMUSG000000027199,<br>ENSMUSG000000025877, ENSMUSG000000030268,<br>ENSMUSG000000020638, ENSMUSG000000020684,<br>ENSMUSG000000017146, ENSMUSG000000019845,<br>ENSMUSG000000040296, ENSMUSG000000029366,<br>ENSMUSG000000040264, ENSMUSG000000070327,<br>ENSMUSG000000000182, ENSMUSG000000023045,<br>ENSMUSG000000037321, ENSMUSG0000000031551,<br>ENSMUSG000000022548, ENSMUSG000000034329,<br>ENSMUSG000000040627, ENSMUSG000000056494,<br>ENSMUSG000000024795, ENSMUSG000000032690,<br>ENSMUSG000000021983, ENSMUSG000000037440,<br>ENSMUSG000000039519, ENSMUSG000000024401,<br>ENSMUSG000000050370, ENSMUSG000000024339,<br>ENSMUSG000000022587, ENSMUSG000000020649,<br>ENSMUSG000000040658, ENSMUSG000000022126,<br>ENSMUSG000000020010, ENSMUSG000000041064 | 0.000217949 | 108 | ENSMUSG000000037686, ENSMUSG000000030302,<br>ENSMUSG000000032263, ENSMUSG000000033327,<br>ENSMUSG000000032262, ENSMUSG000000025889,<br>ENSMUSG000000062515, ENSMUSG000000023328,<br>ENSMUSG000000020182, ENSMUSG00000002588,<br>ENSMUSG00000002010, ENSMUSG000000013418,<br>ENSMUSG00000004038, ENSMUSG000000032310,<br>ENSMUSG000000032418, ENSMUSG000000033350,<br>ENSMUSG000000027513, ENSMUSG000000031760,<br>ENSMUSG000000032279, ENSMUSG000000025150,<br>ENSMUSG000000027401, ENSMUSG000000074183,<br>ENSMUSG000000037071, ENSMUSG000000017697,<br>ENSMUSG000000041696, ENSMUSG000000060579,<br>ENSMUSG000000016239, ENSMUSG000000032348,<br>ENSMUSG000000038967, ENSMUSG000000022878,<br>ENSMUSG000000078597, ENSMUSG000000030399,<br>ENSMUSG000000059201, ENSMUSG000000019359,<br>ENSMUSG000000066072, ENSMUSG000000023019,<br>ENSMUSG000000062380, ENSMUSG000000004885,<br>ENSMUSG000000040181, ENSMUSG000000030972,<br>ENSMUSG000000041616, ENSMUSG000000041624,<br>ENSMUSG000000032908, ENSMUSG000000058135,<br>ENSMUSG000000059412, ENSMUSG000000032315,<br>ENSMUSG000000000049, ENSMUSG000000027820, |

|  |  |  |  |  |  |                                                                                                                                                                                                                                                                                                                                                                                                                                                                                                                                                                                                                                                                                                                                                                                                                                                                                                                                                                                                                                                                                                                                                            |
|--|--|--|--|--|--|------------------------------------------------------------------------------------------------------------------------------------------------------------------------------------------------------------------------------------------------------------------------------------------------------------------------------------------------------------------------------------------------------------------------------------------------------------------------------------------------------------------------------------------------------------------------------------------------------------------------------------------------------------------------------------------------------------------------------------------------------------------------------------------------------------------------------------------------------------------------------------------------------------------------------------------------------------------------------------------------------------------------------------------------------------------------------------------------------------------------------------------------------------|
|  |  |  |  |  |  | ENSMUSG00000022040, ENSMUSG00000025271,<br>ENSMUSG00000024990, ENSMUSG00000032083,<br>ENSMUSG00000075217, ENSMUSG00000031425,<br>ENSMUSG00000024892, ENSMUSG00000050195,<br>ENSMUSG00000041653, ENSMUSG00000025175,<br>ENSMUSG00000027380, ENSMUSG00000030730,<br>ENSMUSG00000046402, ENSMUSG00000029735,<br>ENSMUSG00000024534, ENSMUSG00000038216,<br>ENSMUSG00000025037, ENSMUSG00000031996,<br>ENSMUSG00000036813, ENSMUSG00000037347,<br>ENSMUSG00000032807, ENSMUSG00000067653,<br>ENSMUSG00000019278, ENSMUSG00000032060,<br>ENSMUSG00000028773, ENSMUSG00000029019,<br>ENSMUSG00000029361, ENSMUSG00000022519,<br>ENSMUSG00000025153, ENSMUSG00000025202,<br>ENSMUSG00000073465, ENSMUSG00000057880,<br>ENSMUSG00000002769, ENSMUSG00000073424,<br>ENSMUSG00000040752, ENSMUSG00000032349,<br>ENSMUSG00000032570, ENSMUSG00000021622,<br>ENSMUSG00000024039, ENSMUSG00000000168,<br>ENSMUSG00000031299, ENSMUSG00000025991,<br>ENSMUSG00000025815, ENSMUSG00000053093,<br>ENSMUSG00000000889, ENSMUSG00000027559,<br>ENSMUSG00000019478, ENSMUSG00000090150,<br>ENSMUSG00000032081, ENSMUSG00000035540,<br>ENSMUSG00000030747, ENSMUSG00000028167, |
|--|--|--|--|--|--|------------------------------------------------------------------------------------------------------------------------------------------------------------------------------------------------------------------------------------------------------------------------------------------------------------------------------------------------------------------------------------------------------------------------------------------------------------------------------------------------------------------------------------------------------------------------------------------------------------------------------------------------------------------------------------------------------------------------------------------------------------------------------------------------------------------------------------------------------------------------------------------------------------------------------------------------------------------------------------------------------------------------------------------------------------------------------------------------------------------------------------------------------------|

|            |                                              |                 |    |                                                                                                                                                                                                                                                                                                                                                                                                |             |    |                                                                                                                                                                                                                                                                                      |
|------------|----------------------------------------------|-----------------|----|------------------------------------------------------------------------------------------------------------------------------------------------------------------------------------------------------------------------------------------------------------------------------------------------------------------------------------------------------------------------------------------------|-------------|----|--------------------------------------------------------------------------------------------------------------------------------------------------------------------------------------------------------------------------------------------------------------------------------------|
|            |                                              |                 |    |                                                                                                                                                                                                                                                                                                                                                                                                |             |    | ENSMUSG00000031373, ENSMUSG00000029695,<br>ENSMUSG00000041220, ENSMUSG00000035202,<br>ENSMUSG00000020532, ENSMUSG00000028307,<br>ENSMUSG00000012187, ENSMUSG00000020475                                                                                                              |
| GO:0055008 | cardiac muscle tissue morphogenesis          | 1               | 0  |                                                                                                                                                                                                                                                                                                                                                                                                | 0.000117943 | 13 | ENSMUSG00000035458, ENSMUSG00000032366,<br>ENSMUSG00000027470, ENSMUSG00000046714,<br>ENSMUSG00000059741, ENSMUSG00000091898,<br>ENSMUSG00000053093, ENSMUSG00000006235,<br>ENSMUSG00000026418, ENSMUSG00000007877,<br>ENSMUSG00000021909, ENSMUSG00000040289,<br>ENSMUSG00000040752 |
| GO:2000501 | regulation of natural killer cell chemotaxis | 6.72E-06        | 6  | ENSMUSG00000026573, ENSMUSG00000035373,<br>ENSMUSG00000018930, ENSMUSG00000035385,<br>ENSMUSG00000000982, ENSMUSG00000035042                                                                                                                                                                                                                                                                   | 1           | 0  |                                                                                                                                                                                                                                                                                      |
| GO:0016045 | detection of bacterium                       | 0.00509985<br>9 | 6  | ENSMUSG00000027995, ENSMUSG00000044827,<br>ENSMUSG00000030413, ENSMUSG00000079563,<br>ENSMUSG00000051498, ENSMUSG00000055994                                                                                                                                                                                                                                                                   | 1           | 0  |                                                                                                                                                                                                                                                                                      |
| GO:0050707 | regulation of cytokine secretion             | 1.81E-07        | 18 | ENSMUSG00000030142, ENSMUSG00000055170,<br>ENSMUSG00000027995, ENSMUSG00000055994,<br>ENSMUSG00000051439, ENSMUSG00000074115,<br>ENSMUSG00000016529, ENSMUSG00000000982,<br>ENSMUSG00000032691, ENSMUSG00000030793,<br>ENSMUSG00000029075, ENSMUSG00000028874,<br>ENSMUSG00000029915, ENSMUSG00000024401,<br>ENSMUSG00000025746, ENSMUSG00000044811,<br>ENSMUSG00000078817, ENSMUSG00000079227 | 1           | 7  | ENSMUSG00000031495, ENSMUSG00000032083,<br>ENSMUSG00000026874, ENSMUSG00000032076,<br>ENSMUSG00000062778, ENSMUSG00000010047,<br>ENSMUSG00000024526                                                                                                                                  |

|            |                                               |          |    |                                                                                                                                                                                                                                                                                                                                                                                                                                                                                                |             |    |                                                                                                                                                                                                                                                                                                                                                    |
|------------|-----------------------------------------------|----------|----|------------------------------------------------------------------------------------------------------------------------------------------------------------------------------------------------------------------------------------------------------------------------------------------------------------------------------------------------------------------------------------------------------------------------------------------------------------------------------------------------|-------------|----|----------------------------------------------------------------------------------------------------------------------------------------------------------------------------------------------------------------------------------------------------------------------------------------------------------------------------------------------------|
| GO:0006941 | striated muscle contraction                   | 1        | 0  |                                                                                                                                                                                                                                                                                                                                                                                                                                                                                                | 1.17E-10    | 17 | ENSMUSG00000064179, ENSMUSG00000035458, ENSMUSG00000032366, ENSMUSG00000027470, ENSMUSG00000091898, ENSMUSG00000021909, ENSMUSG00000061816, ENSMUSG00000017300, ENSMUSG00000061723, ENSMUSG00000031097, ENSMUSG00000061086, ENSMUSG00000020216, ENSMUSG00000020623, ENSMUSG00000059741, ENSMUSG00000029361, ENSMUSG00000040752, ENSMUSG00000020475 |
| GO:0050670 | regulation of lymphocyte proliferation        | 3.06E-06 | 24 | ENSMUSG00000016496, ENSMUSG00000044701, ENSMUSG00000055170, ENSMUSG00000073412, ENSMUSG00000027843, ENSMUSG00000035042, ENSMUSG00000026573, ENSMUSG00000049103, ENSMUSG00000016529, ENSMUSG00000004296, ENSMUSG00000000791, ENSMUSG00000022901, ENSMUSG00000026656, ENSMUSG00000029075, ENSMUSG00000075122, ENSMUSG00000016498, ENSMUSG00000030365, ENSMUSG00000026011, ENSMUSG00000024397, ENSMUSG00000025746, ENSMUSG00000020053, ENSMUSG00000027398, ENSMUSG00000031551, ENSMUSG00000026770 | 1           | 4  | ENSMUSG00000063632, ENSMUSG00000024653, ENSMUSG00000026532, ENSMUSG00000017697                                                                                                                                                                                                                                                                     |
| GO:0003229 | ventricular cardiac muscle tissue development | 1        | 0  |                                                                                                                                                                                                                                                                                                                                                                                                                                                                                                | 0.000673126 | 11 | ENSMUSG00000035458, ENSMUSG00000032366, ENSMUSG00000046714, ENSMUSG00000059741, ENSMUSG00000091898, ENSMUSG00000053093, ENSMUSG00000006235, ENSMUSG00000026418, ENSMUSG00000021909, ENSMUSG00000040289,                                                                                                                                            |

|            |                                  |                 |    |                                                                                                                                                                                                                                                                                                                                                                                                                                                                                                                                                                                |             |    |                                                                                                                                                                                                                                                                                                                                                                                                                                                         |
|------------|----------------------------------|-----------------|----|--------------------------------------------------------------------------------------------------------------------------------------------------------------------------------------------------------------------------------------------------------------------------------------------------------------------------------------------------------------------------------------------------------------------------------------------------------------------------------------------------------------------------------------------------------------------------------|-------------|----|---------------------------------------------------------------------------------------------------------------------------------------------------------------------------------------------------------------------------------------------------------------------------------------------------------------------------------------------------------------------------------------------------------------------------------------------------------|
|            |                                  |                 |    |                                                                                                                                                                                                                                                                                                                                                                                                                                                                                                                                                                                |             |    | ENSMUSG00000040752                                                                                                                                                                                                                                                                                                                                                                                                                                      |
| GO:0050900 | leukocyte migration              | 4.87E-14        | 28 | ENSMUSG00000055170, ENSMUSG00000035352, ENSMUSG00000048534, ENSMUSG00000001444, ENSMUSG00000058427, ENSMUSG00000029379, ENSMUSG00000035042, ENSMUSG00000071005, ENSMUSG00000058715, ENSMUSG00000026573, ENSMUSG00000035373, ENSMUSG00000049103, ENSMUSG00000074115, ENSMUSG00000035385, ENSMUSG00000000982, ENSMUSG00000020310, ENSMUSG00000029304, ENSMUSG00000050232, ENSMUSG00000023078, ENSMUSG00000026582, ENSMUSG00000018930, ENSMUSG00000030786, ENSMUSG00000024401, ENSMUSG00000026580, ENSMUSG00000025804, ENSMUSG00000027398, ENSMUSG00000029380, ENSMUSG00000025473 | 1           | 6  | ENSMUSG00000059481, ENSMUSG00000059201, ENSMUSG00000023235, ENSMUSG00000019326, ENSMUSG00000000889, ENSMUSG00000026874                                                                                                                                                                                                                                                                                                                                  |
| GO:0051336 | regulation of hydrolase activity | 0.31966791<br>6 | 52 | ENSMUSG00000017716, ENSMUSG00000074148, ENSMUSG00000029664, ENSMUSG00000066363, ENSMUSG00000021403, ENSMUSG00000041481, ENSMUSG00000027699, ENSMUSG00000066861, ENSMUSG00000068129, ENSMUSG00000032691, ENSMUSG00000023132, ENSMUSG00000028072, ENSMUSG00000000817, ENSMUSG00000004952, ENSMUSG00000058207, ENSMUSG00000061947, ENSMUSG00000025129, ENSMUSG00000020053, ENSMUSG00000066364, ENSMUSG00000021091, ENSMUSG00000049608, ENSMUSG00000034459,                                                                                                                        | 0.002991948 | 61 | ENSMUSG00000001995, ENSMUSG00000032366, ENSMUSG00000025889, ENSMUSG00000024500, ENSMUSG00000054422, ENSMUSG00000026715, ENSMUSG00000090877, ENSMUSG00000037188, ENSMUSG00000071317, ENSMUSG00000021909, ENSMUSG00000041688, ENSMUSG00000039278, ENSMUSG00000061311, ENSMUSG00000026874, ENSMUSG00000059495, ENSMUSG00000023336, ENSMUSG00000061086, ENSMUSG00000031760, ENSMUSG00000028356, ENSMUSG00000030359, ENSMUSG00000058260, ENSMUSG00000019278, |

|            |                                             |                 |    |                                                                                                                                                                                                                                                                                                                                                                                                                                                                                                                                                                                                                      |             |    |                                                                                                                                                                                                                                                                                                                                                                                                                                                                                                                                                                                                                                                                                                                                                                                                            |
|------------|---------------------------------------------|-----------------|----|----------------------------------------------------------------------------------------------------------------------------------------------------------------------------------------------------------------------------------------------------------------------------------------------------------------------------------------------------------------------------------------------------------------------------------------------------------------------------------------------------------------------------------------------------------------------------------------------------------------------|-------------|----|------------------------------------------------------------------------------------------------------------------------------------------------------------------------------------------------------------------------------------------------------------------------------------------------------------------------------------------------------------------------------------------------------------------------------------------------------------------------------------------------------------------------------------------------------------------------------------------------------------------------------------------------------------------------------------------------------------------------------------------------------------------------------------------------------------|
|            |                                             |                 |    | ENSMUSG00000055170, ENSMUSG00000035042, ENSMUSG0000002992, ENSMUSG00000059657, ENSMUSG00000026475, ENSMUSG00000023015, ENSMUSG00000025739, ENSMUSG00000021697, ENSMUSG00000041536, ENSMUSG00000021886, ENSMUSG00000023078, ENSMUSG00000030793, ENSMUSG00000045471, ENSMUSG00000032661, ENSMUSG0000001131, ENSMUSG00000026582, ENSMUSG00000079597, ENSMUSG00000026358, ENSMUSG00000079012, ENSMUSG00000036986, ENSMUSG00000034116, ENSMUSG00000024401, ENSMUSG00000048806, ENSMUSG00000025746, ENSMUSG00000066361, ENSMUSG00000078817, ENSMUSG00000030111, ENSMUSG00000051949, ENSMUSG00000026779, ENSMUSG00000021451 |             |    | ENSMUSG00000055561, ENSMUSG00000022871, ENSMUSG00000070531, ENSMUSG00000044037, ENSMUSG00000032060, ENSMUSG00000036867, ENSMUSG00000029361, ENSMUSG00000015354, ENSMUSG00000000881, ENSMUSG00000051234, ENSMUSG00000040752, ENSMUSG00000025860, ENSMUSG00000031216, ENSMUSG00000035458, ENSMUSG00000055653, ENSMUSG00000022868, ENSMUSG00000031214, ENSMUSG00000044594, ENSMUSG00000007815, ENSMUSG00000091898, ENSMUSG00000058017, ENSMUSG00000050730, ENSMUSG00000000049, ENSMUSG00000059956, ENSMUSG00000067006, ENSMUSG00000019478, ENSMUSG00000061723, ENSMUSG00000039585, ENSMUSG00000032081, ENSMUSG00000026327, ENSMUSG00000032356, ENSMUSG00000032083, ENSMUSG00000027442, ENSMUSG00000031355, ENSMUSG00000046814, ENSMUSG00000022206, ENSMUSG00000025265, ENSMUSG00000031980, ENSMUSG00000028307 |
| GO:2000242 | negative regulation of reproductive process | 0.00821070<br>2 | 10 | ENSMUSG00000032661, ENSMUSG00000018930, ENSMUSG00000022838, ENSMUSG00000035042, ENSMUSG00000024401, ENSMUSG00000026222, ENSMUSG00000048806, ENSMUSG00000066861, ENSMUSG0000000982, ENSMUSG00000034459                                                                                                                                                                                                                                                                                                                                                                                                                | 1           | 0  |                                                                                                                                                                                                                                                                                                                                                                                                                                                                                                                                                                                                                                                                                                                                                                                                            |
| GO:0048644 | muscle organ morphogenesis                  | 1               | 2  | ENSMUSG00000022587, ENSMUSG00000034394                                                                                                                                                                                                                                                                                                                                                                                                                                                                                                                                                                               | 0.000576534 | 14 | ENSMUSG00000035458, ENSMUSG00000032366,                                                                                                                                                                                                                                                                                                                                                                                                                                                                                                                                                                                                                                                                                                                                                                    |



|            |                                          |          |     |                                                                                                                                                                                                                                                                                                                                                                                                                                                         |   |    |                                                                                                                                                                                                                                                                                                                                                                                                                                    |
|------------|------------------------------------------|----------|-----|---------------------------------------------------------------------------------------------------------------------------------------------------------------------------------------------------------------------------------------------------------------------------------------------------------------------------------------------------------------------------------------------------------------------------------------------------------|---|----|------------------------------------------------------------------------------------------------------------------------------------------------------------------------------------------------------------------------------------------------------------------------------------------------------------------------------------------------------------------------------------------------------------------------------------|
|            |                                          |          |     |                                                                                                                                                                                                                                                                                                                                                                                                                                                         |   |    | ENSMUSG00000027470, ENSMUSG00000027077, ENSMUSG00000046714, ENSMUSG00000059741, ENSMUSG00000091898, ENSMUSG00000053093, ENSMUSG00000006235, ENSMUSG00000026418, ENSMUSG00000007877, ENSMUSG00000021909, ENSMUSG00000040289, ENSMUSG00000040752                                                                                                                                                                                     |
| GO:0050714 | positive regulation of protein secretion | 9.62E-06 | 17  | ENSMUSG00000030142, ENSMUSG00000055170, ENSMUSG00000027995, ENSMUSG00000055994, ENSMUSG00000051439, ENSMUSG00000074115, ENSMUSG00000016529, ENSMUSG00000000982, ENSMUSG00000032691, ENSMUSG00000030793, ENSMUSG00000029075, ENSMUSG00000028874, ENSMUSG00000029915, ENSMUSG00000024401, ENSMUSG00000025746, ENSMUSG00000044811, ENSMUSG00000079227                                                                                                      | 1 | 7  | ENSMUSG00000024990, ENSMUSG00000034584, ENSMUSG00000031495, ENSMUSG00000026874, ENSMUSG00000032076, ENSMUSG00000062778, ENSMUSG00000010047                                                                                                                                                                                                                                                                                         |
| GO:0002682 | regulation of immune system process      | 1.86E-34 | 104 | ENSMUSG00000036931, ENSMUSG00000060802, ENSMUSG00000027995, ENSMUSG00000073412, ENSMUSG00000036887, ENSMUSG00000049103, ENSMUSG00000061232, ENSMUSG00000016529, ENSMUSG00000018930, ENSMUSG00000022906, ENSMUSG00000036896, ENSMUSG00000040296, ENSMUSG00000025804, ENSMUSG00000020053, ENSMUSG00000034652, ENSMUSG00000030895, ENSMUSG00000051498, ENSMUSG00000037321, ENSMUSG00000034855, ENSMUSG00000031551, ENSMUSG00000030921, ENSMUSG00000026770, | 1 | 21 | ENSMUSG00000031380, ENSMUSG00000042812, ENSMUSG00000059201, ENSMUSG00000025889, ENSMUSG00000019326, ENSMUSG00000061780, ENSMUSG00000090877, ENSMUSG00000046402, ENSMUSG00000024028, ENSMUSG00000026874, ENSMUSG00000020889, ENSMUSG00000024990, ENSMUSG00000024653, ENSMUSG00000043496, ENSMUSG00000032083, ENSMUSG00000017697, ENSMUSG00000063632, ENSMUSG00000046834, ENSMUSG00000022878, ENSMUSG00000032076, ENSMUSG00000026532 |

|  |  |  |  |                                                                                                                                                                                                                                                                                                                                                                                                                                                                                                                                                                                                                                                                                                                                                                                                                                                                                                                                                                                                                                                                                                                                                              |  |  |  |
|--|--|--|--|--------------------------------------------------------------------------------------------------------------------------------------------------------------------------------------------------------------------------------------------------------------------------------------------------------------------------------------------------------------------------------------------------------------------------------------------------------------------------------------------------------------------------------------------------------------------------------------------------------------------------------------------------------------------------------------------------------------------------------------------------------------------------------------------------------------------------------------------------------------------------------------------------------------------------------------------------------------------------------------------------------------------------------------------------------------------------------------------------------------------------------------------------------------|--|--|--|
|  |  |  |  | ENSMUSG00000025473, ENSMUSG00000005696,<br>ENSMUSG00000044701, ENSMUSG00000045322,<br>ENSMUSG00000001444, ENSMUSG000000055994,<br>ENSMUSG00000022548, ENSMUSG000000040751,<br>ENSMUSG00000024353, ENSMUSG00000030149,<br>ENSMUSG00000040552, ENSMUSG00000035373,<br>ENSMUSG00000024371, ENSMUSG00000000982,<br>ENSMUSG00000055172, ENSMUSG00000026656,<br>ENSMUSG00000023913, ENSMUSG00000050241,<br>ENSMUSG00000029075, ENSMUSG00000030124,<br>ENSMUSG00000026582, ENSMUSG00000079620,<br>ENSMUSG00000016498, ENSMUSG00000024397,<br>ENSMUSG00000022876, ENSMUSG00000048806,<br>ENSMUSG00000042345, ENSMUSG00000044583,<br>ENSMUSG00000074151, ENSMUSG00000074148,<br>ENSMUSG00000040528, ENSMUSG00000036905,<br>ENSMUSG00000071005, ENSMUSG00000029377,<br>ENSMUSG00000024696, ENSMUSG00000073406,<br>ENSMUSG00000038179, ENSMUSG00000035385,<br>ENSMUSG00000053063, ENSMUSG00000073411,<br>ENSMUSG00000030413, ENSMUSG00000075122,<br>ENSMUSG00000028874, ENSMUSG00000030365,<br>ENSMUSG00000026011, ENSMUSG00000027398,<br>ENSMUSG00000027639, ENSMUSG00000049608,<br>ENSMUSG00000034459, ENSMUSG00000041324,<br>ENSMUSG00000067212, ENSMUSG00000016496, |  |  |  |
|--|--|--|--|--------------------------------------------------------------------------------------------------------------------------------------------------------------------------------------------------------------------------------------------------------------------------------------------------------------------------------------------------------------------------------------------------------------------------------------------------------------------------------------------------------------------------------------------------------------------------------------------------------------------------------------------------------------------------------------------------------------------------------------------------------------------------------------------------------------------------------------------------------------------------------------------------------------------------------------------------------------------------------------------------------------------------------------------------------------------------------------------------------------------------------------------------------------|--|--|--|

|            |       |          |    |                                                                                                                                                                                                                                                                                                                                                                                                                                                                                                                                                                                                                                                                  |   |    |                                                                                                                                                                                                                    |
|------------|-------|----------|----|------------------------------------------------------------------------------------------------------------------------------------------------------------------------------------------------------------------------------------------------------------------------------------------------------------------------------------------------------------------------------------------------------------------------------------------------------------------------------------------------------------------------------------------------------------------------------------------------------------------------------------------------------------------|---|----|--------------------------------------------------------------------------------------------------------------------------------------------------------------------------------------------------------------------|
|            |       |          |    | ENSMUSG00000055170, ENSMUSG00000027843,<br>ENSMUSG00000092005, ENSMUSG00000035042,<br>ENSMUSG00000058715, ENSMUSG00000071552,<br>ENSMUSG00000024349, ENSMUSG00000026573,<br>ENSMUSG00000004296, ENSMUSG00000020310,<br>ENSMUSG00000000791, ENSMUSG00000015947,<br>ENSMUSG00000022901, ENSMUSG00000029371,<br>ENSMUSG00000023078, ENSMUSG00000037440,<br>ENSMUSG00000034394, ENSMUSG00000079298,<br>ENSMUSG00000036986, ENSMUSG00000024401,<br>ENSMUSG00000074622, ENSMUSG00000090231,<br>ENSMUSG00000026580, ENSMUSG00000024339,<br>ENSMUSG00000025746, ENSMUSG00000041347,<br>ENSMUSG00000030111, ENSMUSG00000042726,<br>ENSMUSG00000049109, ENSMUSG00000026177 |   |    |                                                                                                                                                                                                                    |
| GO:0042330 | taxis | 4.55E-07 | 37 | ENSMUSG00000035352, ENSMUSG00000048534,<br>ENSMUSG00000058427, ENSMUSG00000029379,<br>ENSMUSG00000071005, ENSMUSG00000009185,<br>ENSMUSG00000049103, ENSMUSG00000074115,<br>ENSMUSG00000035385, ENSMUSG00000017724,<br>ENSMUSG00000050232, ENSMUSG00000026166,<br>ENSMUSG00000028072, ENSMUSG00000018930,<br>ENSMUSG00000030786, ENSMUSG00000000247,<br>ENSMUSG00000025804, ENSMUSG00000027398,<br>ENSMUSG00000034855, ENSMUSG00000025473,<br>ENSMUSG00000029005, ENSMUSG00000018920,                                                                                                                                                                            | 1 | 10 | ENSMUSG00000031380, ENSMUSG00000025810,<br>ENSMUSG00000032547, ENSMUSG00000062380,<br>ENSMUSG00000052911, ENSMUSG00000031780,<br>ENSMUSG00000041012, ENSMUSG00000023235,<br>ENSMUSG00000026874, ENSMUSG00000041688 |

|            |               |          |    |                                                                                                                                                                                                                                                                                                                                                                                                                                                                                                                                                                             |             |   |                                                                                                                                                                                                |
|------------|---------------|----------|----|-----------------------------------------------------------------------------------------------------------------------------------------------------------------------------------------------------------------------------------------------------------------------------------------------------------------------------------------------------------------------------------------------------------------------------------------------------------------------------------------------------------------------------------------------------------------------------|-------------|---|------------------------------------------------------------------------------------------------------------------------------------------------------------------------------------------------|
|            |               |          |    | ENSMUSG00000055170, ENSMUSG00000035042,<br>ENSMUSG00000056529, ENSMUSG00000058715,<br>ENSMUSG00000070691, ENSMUSG00000030077,<br>ENSMUSG00000026573, ENSMUSG00000040552,<br>ENSMUSG00000035373, ENSMUSG00000029304,<br>ENSMUSG00000000982, ENSMUSG00000023078,<br>ENSMUSG00000037868, ENSMUSG00000029380,<br>ENSMUSG00000079700                                                                                                                                                                                                                                             |             |   |                                                                                                                                                                                                |
| GO:0003015 | heart process | 1        | 0  |                                                                                                                                                                                                                                                                                                                                                                                                                                                                                                                                                                             | 0.006612069 | 9 | ENSMUSG00000035458, ENSMUSG00000061086,<br>ENSMUSG00000032366, ENSMUSG00000049281,<br>ENSMUSG00000020623, ENSMUSG00000059741,<br>ENSMUSG00000091898, ENSMUSG00000021909,<br>ENSMUSG00000061816 |
| GO:0051301 | cell division | 7.66E-13 | 51 | ENSMUSG00000017716, ENSMUSG00000024791,<br>ENSMUSG00000045273, ENSMUSG00000027699,<br>ENSMUSG00000024989, ENSMUSG00000005410,<br>ENSMUSG00000068744, ENSMUSG00000019942,<br>ENSMUSG00000045328, ENSMUSG00000006398,<br>ENSMUSG00000028873, ENSMUSG00000002055,<br>ENSMUSG00000027379, ENSMUSG00000024056,<br>ENSMUSG00000037725, ENSMUSG00000027469,<br>ENSMUSG00000027331, ENSMUSG00000027715,<br>ENSMUSG00000029414, ENSMUSG00000044201,<br>ENSMUSG00000026683, ENSMUSG00000023505,<br>ENSMUSG00000032322, ENSMUSG00000026039,<br>ENSMUSG00000041431, ENSMUSG00000040084, | 1           | 8 | ENSMUSG00000025812, ENSMUSG00000031176,<br>ENSMUSG00000036782, ENSMUSG00000035486,<br>ENSMUSG00000032064, ENSMUSG00000025862,<br>ENSMUSG00000007815, ENSMUSG00000001403                        |

|            |                                                 |          |    |                                                                                                                                                                                                                                                                                                                                                                                                                                                                                                                                                        |   |   |                                                                                   |
|------------|-------------------------------------------------|----------|----|--------------------------------------------------------------------------------------------------------------------------------------------------------------------------------------------------------------------------------------------------------------------------------------------------------------------------------------------------------------------------------------------------------------------------------------------------------------------------------------------------------------------------------------------------------|---|---|-----------------------------------------------------------------------------------|
|            |                                                 |          |    | ENSMUSG00000036223, ENSMUSG00000027306,<br>ENSMUSG00000023015, ENSMUSG00000024795,<br>ENSMUSG00000002307, ENSMUSG00000069910,<br>ENSMUSG00000025001, ENSMUSG00000048922,<br>ENSMUSG00000051378, ENSMUSG00000002068,<br>ENSMUSG00000020897, ENSMUSG00000038943,<br>ENSMUSG00000017499, ENSMUSG00000071350,<br>ENSMUSG00000020415, ENSMUSG00000028678,<br>ENSMUSG00000012443, ENSMUSG00000030867,<br>ENSMUSG00000074476, ENSMUSG00000023940,<br>ENSMUSG00000072082, ENSMUSG00000026779,<br>ENSMUSG00000033952, ENSMUSG00000032218,<br>ENSMUSG00000027496 |   |   |                                                                                   |
| GO:0002685 | regulation of leukocyte migration               | 1.80E-09 | 21 | ENSMUSG00000027995, ENSMUSG00000035042,<br>ENSMUSG00000055994, ENSMUSG00000022548,<br>ENSMUSG00000071005, ENSMUSG00000040552,<br>ENSMUSG00000026573, ENSMUSG00000035373,<br>ENSMUSG00000049103, ENSMUSG00000035385,<br>ENSMUSG00000000982, ENSMUSG00000020310,<br>ENSMUSG00000023913, ENSMUSG00000023078,<br>ENSMUSG00000026582, ENSMUSG00000018930,<br>ENSMUSG00000024397, ENSMUSG00000026580,<br>ENSMUSG00000041347, ENSMUSG00000034855,<br>ENSMUSG00000025473                                                                                       | 1 | 4 | ENSMUSG00000031380, ENSMUSG00000019326,<br>ENSMUSG00000026874, ENSMUSG00000017697 |
| GO:0002821 | positive regulation of adaptive immune response | 1.48E-06 | 16 | ENSMUSG00000060802, ENSMUSG00000055994,<br>ENSMUSG00000058715, ENSMUSG00000026573,                                                                                                                                                                                                                                                                                                                                                                                                                                                                     | 1 | 2 | ENSMUSG00000090877, ENSMUSG00000017697                                            |

|            |                             |          |    |                                                                                                                                                                                                                                                               |          |    |                                                                                                                                                                                                                                                                                                                                                                                                                                                                                                                                                                                                                                                                                         |
|------------|-----------------------------|----------|----|---------------------------------------------------------------------------------------------------------------------------------------------------------------------------------------------------------------------------------------------------------------|----------|----|-----------------------------------------------------------------------------------------------------------------------------------------------------------------------------------------------------------------------------------------------------------------------------------------------------------------------------------------------------------------------------------------------------------------------------------------------------------------------------------------------------------------------------------------------------------------------------------------------------------------------------------------------------------------------------------------|
|            |                             |          |    | ENSMUSG00000061232, ENSMUSG00000049103,<br>ENSMUSG00000004296, ENSMUSG00000000791,<br>ENSMUSG00000015947, ENSMUSG00000073411,<br>ENSMUSG00000024401, ENSMUSG00000024339,<br>ENSMUSG00000030895, ENSMUSG00000037321,<br>ENSMUSG00000026177, ENSMUSG00000067212 |          |    |                                                                                                                                                                                                                                                                                                                                                                                                                                                                                                                                                                                                                                                                                         |
| GO:0003013 | circulatory system process  | 1        | 7  | ENSMUSG00000030525, ENSMUSG00000040552,<br>ENSMUSG00000026104, ENSMUSG00000018930,<br>ENSMUSG00000041347, ENSMUSG00000031891,<br>ENSMUSG000000054136                                                                                                          | 1.65E-06 | 31 | ENSMUSG00000020123, ENSMUSG00000035458,<br>ENSMUSG00000059201, ENSMUSG00000032366,<br>ENSMUSG00000019326, ENSMUSG00000024039,<br>ENSMUSG00000041616, ENSMUSG00000046714,<br>ENSMUSG00000001865, ENSMUSG00000091898,<br>ENSMUSG00000061068, ENSMUSG00000002588,<br>ENSMUSG00000021909, ENSMUSG00000041688,<br>ENSMUSG00000061816, ENSMUSG00000022040,<br>ENSMUSG00000031489, ENSMUSG00000061086,<br>ENSMUSG00000049281, ENSMUSG00000020623,<br>ENSMUSG00000015405, ENSMUSG00000059741,<br>ENSMUSG00000029019, ENSMUSG00000022206,<br>ENSMUSG00000037010, ENSMUSG00000029361,<br>ENSMUSG00000031980, ENSMUSG00000057880,<br>ENSMUSG00000024027, ENSMUSG00000022878,<br>ENSMUSG00000040752 |
| GO:0035456 | response to interferon-beta | 2.15E-19 | 17 | ENSMUSG00000028269, ENSMUSG00000078922,<br>ENSMUSG00000079362, ENSMUSG00000028270,<br>ENSMUSG00000043263, ENSMUSG00000078853,<br>ENSMUSG00000049734, ENSMUSG00000054203,                                                                                      | 1        | 0  |                                                                                                                                                                                                                                                                                                                                                                                                                                                                                                                                                                                                                                                                                         |

|            |                                                                    |                 |    |                                                                                                                                                                                                                                                                                                                                                                                                                                          |             |    |                                                                                                                                                                                                                                                                                                                                                                                                                                                                                                                                                        |
|------------|--------------------------------------------------------------------|-----------------|----|------------------------------------------------------------------------------------------------------------------------------------------------------------------------------------------------------------------------------------------------------------------------------------------------------------------------------------------------------------------------------------------------------------------------------------------|-------------|----|--------------------------------------------------------------------------------------------------------------------------------------------------------------------------------------------------------------------------------------------------------------------------------------------------------------------------------------------------------------------------------------------------------------------------------------------------------------------------------------------------------------------------------------------------------|
|            |                                                                    |                 |    | ENSMUSG00000073555, ENSMUSG00000074896,<br>ENSMUSG00000037860, ENSMUSG00000073489,<br>ENSMUSG00000028268, ENSMUSG00000039997,<br>ENSMUSG00000026535, ENSMUSG00000054072,<br>ENSMUSG00000034459                                                                                                                                                                                                                                           |             |    |                                                                                                                                                                                                                                                                                                                                                                                                                                                                                                                                                        |
| GO:0010951 | negative regulation of endopeptidase activity                      | 0.19289064<br>3 | 20 | ENSMUSG00000017716, ENSMUSG00000074148,<br>ENSMUSG00000029664, ENSMUSG00000066363,<br>ENSMUSG00000021403, ENSMUSG00000041481,<br>ENSMUSG00000059657, ENSMUSG00000068129,<br>ENSMUSG00000041536, ENSMUSG0000001131,<br>ENSMUSG00000058207, ENSMUSG00000079012,<br>ENSMUSG00000061947, ENSMUSG00000025746,<br>ENSMUSG00000020053, ENSMUSG00000066364,<br>ENSMUSG00000021091, ENSMUSG00000030111,<br>ENSMUSG00000066361, ENSMUSG00000051949 | 0.001091669 | 25 | ENSMUSG00000025860, ENSMUSG00000022868,<br>ENSMUSG00000025889, ENSMUSG00000026715,<br>ENSMUSG00000090877, ENSMUSG00000044594,<br>ENSMUSG00000058017, ENSMUSG00000039278,<br>ENSMUSG00000061311, ENSMUSG00000026874,<br>ENSMUSG00000059956, ENSMUSG00000067006,<br>ENSMUSG00000023336, ENSMUSG00000031760,<br>ENSMUSG00000026327, ENSMUSG00000028356,<br>ENSMUSG00000058260, ENSMUSG00000055561,<br>ENSMUSG00000022871, ENSMUSG00000019278,<br>ENSMUSG00000070531, ENSMUSG00000027442,<br>ENSMUSG00000032060, ENSMUSG00000036867,<br>ENSMUSG00000031980 |
| GO:0044144 | modulation of growth of symbiont involved in interaction with host | 0.00049450<br>7 | 8  | ENSMUSG00000055170, ENSMUSG00000027995,<br>ENSMUSG00000041515, ENSMUSG00000055994,<br>ENSMUSG00000024401, ENSMUSG00000038357,<br>ENSMUSG00000016529, ENSMUSG00000004296                                                                                                                                                                                                                                                                  | 1           | 0  |                                                                                                                                                                                                                                                                                                                                                                                                                                                                                                                                                        |
| GO:0052167 | modulation by symbiont of host innate immune response              | 0.00351362<br>7 | 5  | ENSMUSG00000027995, ENSMUSG00000045322,<br>ENSMUSG00000044583, ENSMUSG00000051498,<br>ENSMUSG00000055994                                                                                                                                                                                                                                                                                                                                 | 1           | 0  |                                                                                                                                                                                                                                                                                                                                                                                                                                                                                                                                                        |
| GO:0042135 | neurotransmitter catabolic                                         | 1               | 0  |                                                                                                                                                                                                                                                                                                                                                                                                                                          | 0.0006581   | 6  | ENSMUSG00000043943, ENSMUSG00000057606,                                                                                                                                                                                                                                                                                                                                                                                                                                                                                                                |

|            |                                  |          |    |                                                                                                                                                                                                                                                                                                                                                                                                                                                                                                                                  |   |    |                                                                                                                                                                                                                                                                                                                                                                                                                                                                                                                                  |
|------------|----------------------------------|----------|----|----------------------------------------------------------------------------------------------------------------------------------------------------------------------------------------------------------------------------------------------------------------------------------------------------------------------------------------------------------------------------------------------------------------------------------------------------------------------------------------------------------------------------------|---|----|----------------------------------------------------------------------------------------------------------------------------------------------------------------------------------------------------------------------------------------------------------------------------------------------------------------------------------------------------------------------------------------------------------------------------------------------------------------------------------------------------------------------------------|
|            | process                          |          |    |                                                                                                                                                                                                                                                                                                                                                                                                                                                                                                                                  |   |    | ENSMUSG00000040147, ENSMUSG00000057880,<br>ENSMUSG00000025037, ENSMUSG00000023328                                                                                                                                                                                                                                                                                                                                                                                                                                                |
| GO:0060326 | cell chemotaxis                  | 4.93E-10 | 23 | ENSMUSG00000055170, ENSMUSG00000035352,<br>ENSMUSG00000048534, ENSMUSG00000058427,<br>ENSMUSG00000029379, ENSMUSG00000035042,<br>ENSMUSG00000071005, ENSMUSG00000058715,<br>ENSMUSG00000026573, ENSMUSG00000035373,<br>ENSMUSG00000049103, ENSMUSG00000074115,<br>ENSMUSG00000035385, ENSMUSG00000000982,<br>ENSMUSG00000029304, ENSMUSG00000050232,<br>ENSMUSG00000023078, ENSMUSG00000018930,<br>ENSMUSG00000030786, ENSMUSG00000025804,<br>ENSMUSG00000027398, ENSMUSG00000029380,<br>ENSMUSG00000025473                      | 1 | 0  |                                                                                                                                                                                                                                                                                                                                                                                                                                                                                                                                  |
| GO:0080134 | regulation of response to stress | 1.26E-08 | 55 | ENSMUSG00000074151, ENSMUSG00000027995,<br>ENSMUSG00000035673, ENSMUSG00000071005,<br>ENSMUSG00000029377, ENSMUSG00000049103,<br>ENSMUSG00000016529, ENSMUSG00000073406,<br>ENSMUSG00000030413, ENSMUSG00000022906,<br>ENSMUSG00000017146, ENSMUSG00000028874,<br>ENSMUSG00000040296, ENSMUSG00000025804,<br>ENSMUSG00000027398, ENSMUSG00000030895,<br>ENSMUSG00000051498, ENSMUSG00000027639,<br>ENSMUSG00000079227, ENSMUSG00000037321,<br>ENSMUSG00000035365, ENSMUSG00000031551,<br>ENSMUSG00000034459, ENSMUSG00000026770, | 1 | 27 | ENSMUSG00000009471, ENSMUSG00000042812,<br>ENSMUSG00000033327, ENSMUSG00000022868,<br>ENSMUSG00000019326, ENSMUSG00000062515,<br>ENSMUSG00000024039, ENSMUSG00000046714,<br>ENSMUSG00000026715, ENSMUSG00000090639,<br>ENSMUSG00000032554, ENSMUSG00000021319,<br>ENSMUSG00000024028, ENSMUSG00000052305,<br>ENSMUSG00000000049, ENSMUSG00000024653,<br>ENSMUSG00000043496, ENSMUSG00000017697,<br>ENSMUSG00000059481, ENSMUSG00000032064,<br>ENSMUSG00000024386, ENSMUSG00000031980,<br>ENSMUSG00000032076, ENSMUSG00000022878, |



|            |                                         |                 |     |                                                                                                                                                                                                                                                                                                                                                                                                                                                                                                                                                                                                                                                                                                                              |   |     |                                                                                                                                                                                                                                                                                                                                                                                                                                                                     |
|------------|-----------------------------------------|-----------------|-----|------------------------------------------------------------------------------------------------------------------------------------------------------------------------------------------------------------------------------------------------------------------------------------------------------------------------------------------------------------------------------------------------------------------------------------------------------------------------------------------------------------------------------------------------------------------------------------------------------------------------------------------------------------------------------------------------------------------------------|---|-----|---------------------------------------------------------------------------------------------------------------------------------------------------------------------------------------------------------------------------------------------------------------------------------------------------------------------------------------------------------------------------------------------------------------------------------------------------------------------|
|            |                                         |                 |     | <p>ENSMUSG00000025473, ENSMUSG00000005696,<br/> ENSMUSG00000045322, ENSMUSG00000022548,<br/> ENSMUSG00000055994, ENSMUSG00000035042,<br/> ENSMUSG00000058715, ENSMUSG00000030149,<br/> ENSMUSG00000024349, ENSMUSG00000030525,<br/> ENSMUSG00000026573, ENSMUSG00000021322,<br/> ENSMUSG00000000982, ENSMUSG00000004296,<br/> ENSMUSG00000026981, ENSMUSG00000000791,<br/> ENSMUSG00000015947, ENSMUSG00000022901,<br/> ENSMUSG00000026656, ENSMUSG00000050241,<br/> ENSMUSG00000029371, ENSMUSG00000030124,<br/> ENSMUSG00000079298, ENSMUSG00000036986,<br/> ENSMUSG00000024401, ENSMUSG00000026580,<br/> ENSMUSG00000024339, ENSMUSG00000044583,<br/> ENSMUSG00000025746, ENSMUSG00000030111,<br/> ENSMUSG00000042726</p> |   |     | <p>ENSMUSG00000073424, ENSMUSG00000010047,<br/> ENSMUSG00000040412</p>                                                                                                                                                                                                                                                                                                                                                                                              |
| GO:0048523 | negative regulation of cellular process | 0.00126829<br>2 | 139 | <p>ENSMUSG00000017716, ENSMUSG00000033538,<br/> ENSMUSG00000036931, ENSMUSG00000049103,<br/> ENSMUSG00000020185, ENSMUSG00000075404,<br/> ENSMUSG00000019942, ENSMUSG00000021190,<br/> ENSMUSG00000000817, ENSMUSG00000036896,<br/> ENSMUSG00000033644, ENSMUSG00000022504,<br/> ENSMUSG00000020053, ENSMUSG00000035365,<br/> ENSMUSG00000031551, ENSMUSG00000042489,<br/> ENSMUSG00000025473, ENSMUSG00000038037,<br/> ENSMUSG00000045322, ENSMUSG00000025492,</p>                                                                                                                                                                                                                                                          | 1 | 102 | <p>ENSMUSG00000020123, ENSMUSG00000032547,<br/> ENSMUSG00000025889, ENSMUSG00000062515,<br/> ENSMUSG00000046532, ENSMUSG00000066357,<br/> ENSMUSG00000090877, ENSMUSG00000039952,<br/> ENSMUSG00000044820, ENSMUSG00000026983,<br/> ENSMUSG00000013418, ENSMUSG00000026874,<br/> ENSMUSG00000033208, ENSMUSG00000026668,<br/> ENSMUSG00000059495, ENSMUSG00000079428,<br/> ENSMUSG00000031760, ENSMUSG00000010051,<br/> ENSMUSG00000017697, ENSMUSG00000036867,</p> |

|  |  |                                                                                                                                                                                                                                                                                                                                                                                                                                                                                                                                                                                                                                                                                                                                                                                                                                                                                                                                                                                                                                                                                                                                                            |  |                                                                                                                                                                                                                                                                                                                                                                                                                                                                                                                                                                                                                                                                                                                                                                                                                                                                                                                                                                                                                                                                                                                                                            |
|--|--|------------------------------------------------------------------------------------------------------------------------------------------------------------------------------------------------------------------------------------------------------------------------------------------------------------------------------------------------------------------------------------------------------------------------------------------------------------------------------------------------------------------------------------------------------------------------------------------------------------------------------------------------------------------------------------------------------------------------------------------------------------------------------------------------------------------------------------------------------------------------------------------------------------------------------------------------------------------------------------------------------------------------------------------------------------------------------------------------------------------------------------------------------------|--|------------------------------------------------------------------------------------------------------------------------------------------------------------------------------------------------------------------------------------------------------------------------------------------------------------------------------------------------------------------------------------------------------------------------------------------------------------------------------------------------------------------------------------------------------------------------------------------------------------------------------------------------------------------------------------------------------------------------------------------------------------------------------------------------------------------------------------------------------------------------------------------------------------------------------------------------------------------------------------------------------------------------------------------------------------------------------------------------------------------------------------------------------------|
|  |  | ENSMUSG00000027368, ENSMUSG00000002992,<br>ENSMUSG00000055994, ENSMUSG00000063268,<br>ENSMUSG00000041431, ENSMUSG00000037313,<br>ENSMUSG00000000982, ENSMUSG00000029304,<br>ENSMUSG00000053175, ENSMUSG00000002307,<br>ENSMUSG00000078763, ENSMUSG00000026656,<br>ENSMUSG00000020897, ENSMUSG00000029075,<br>ENSMUSG00000001131, ENSMUSG00000030124,<br>ENSMUSG00000038418, ENSMUSG00000022876,<br>ENSMUSG00000042345, ENSMUSG00000024079,<br>ENSMUSG00000074151, ENSMUSG00000040613,<br>ENSMUSG00000040528, ENSMUSG00000003665,<br>ENSMUSG00000071005, ENSMUSG00000046845,<br>ENSMUSG00000029377, ENSMUSG00000072620,<br>ENSMUSG00000032691, ENSMUSG00000045328,<br>ENSMUSG00000037725, ENSMUSG00000027398,<br>ENSMUSG00000016496, ENSMUSG00000029005,<br>ENSMUSG00000055170, ENSMUSG00000068227,<br>ENSMUSG00000027843, ENSMUSG00000022838,<br>ENSMUSG00000035042, ENSMUSG00000034329,<br>ENSMUSG00000035186, ENSMUSG00000058715,<br>ENSMUSG00000030077, ENSMUSG00000090125,<br>ENSMUSG00000026475, ENSMUSG00000004296,<br>ENSMUSG00000018486, ENSMUSG00000037440,<br>ENSMUSG00000020415, ENSMUSG00000034394,<br>ENSMUSG00000026358, ENSMUSG00000036986, |  | ENSMUSG00000046240, ENSMUSG00000052187,<br>ENSMUSG00000040289, ENSMUSG00000051234,<br>ENSMUSG00000008035, ENSMUSG00000040055,<br>ENSMUSG00000022878, ENSMUSG00000024027,<br>ENSMUSG00000025860, ENSMUSG00000042812,<br>ENSMUSG00000062713, ENSMUSG00000059201,<br>ENSMUSG00000022868, ENSMUSG00000026984,<br>ENSMUSG00000035486, ENSMUSG00000041616,<br>ENSMUSG00000001494, ENSMUSG00000000049,<br>ENSMUSG00000052217, ENSMUSG00000024990,<br>ENSMUSG00000032422, ENSMUSG00000032083,<br>ENSMUSG00000038775, ENSMUSG00000059481,<br>ENSMUSG00000031355, ENSMUSG00000042903,<br>ENSMUSG00000054196, ENSMUSG00000031980,<br>ENSMUSG00000025810, ENSMUSG00000049556,<br>ENSMUSG00000029368, ENSMUSG00000032366,<br>ENSMUSG00000055980, ENSMUSG00000040147,<br>ENSMUSG00000046714, ENSMUSG00000031841,<br>ENSMUSG00000032010, ENSMUSG00000021319,<br>ENSMUSG00000024028, ENSMUSG00000061311,<br>ENSMUSG00000030607, ENSMUSG00000021055,<br>ENSMUSG00000023336, ENSMUSG00000020889,<br>ENSMUSG00000020427, ENSMUSG00000031431,<br>ENSMUSG00000022996, ENSMUSG00000055561,<br>ENSMUSG00000019278, ENSMUSG00000032216,<br>ENSMUSG00000032060, ENSMUSG00000025862, |
|--|--|------------------------------------------------------------------------------------------------------------------------------------------------------------------------------------------------------------------------------------------------------------------------------------------------------------------------------------------------------------------------------------------------------------------------------------------------------------------------------------------------------------------------------------------------------------------------------------------------------------------------------------------------------------------------------------------------------------------------------------------------------------------------------------------------------------------------------------------------------------------------------------------------------------------------------------------------------------------------------------------------------------------------------------------------------------------------------------------------------------------------------------------------------------|--|------------------------------------------------------------------------------------------------------------------------------------------------------------------------------------------------------------------------------------------------------------------------------------------------------------------------------------------------------------------------------------------------------------------------------------------------------------------------------------------------------------------------------------------------------------------------------------------------------------------------------------------------------------------------------------------------------------------------------------------------------------------------------------------------------------------------------------------------------------------------------------------------------------------------------------------------------------------------------------------------------------------------------------------------------------------------------------------------------------------------------------------------------------|

|  |  |  |                                                                                                                                                                                                                                                                                                                                                                                                                                                                                                                                                                                                                                                                                                                                                                                                                                                                                                                                                                                                                                                                                                                                                          |  |  |                                                                                                                                                                                                                                                                                                                                                                                                                                                                                                                                                                                                                                                                |
|--|--|--|----------------------------------------------------------------------------------------------------------------------------------------------------------------------------------------------------------------------------------------------------------------------------------------------------------------------------------------------------------------------------------------------------------------------------------------------------------------------------------------------------------------------------------------------------------------------------------------------------------------------------------------------------------------------------------------------------------------------------------------------------------------------------------------------------------------------------------------------------------------------------------------------------------------------------------------------------------------------------------------------------------------------------------------------------------------------------------------------------------------------------------------------------------|--|--|----------------------------------------------------------------------------------------------------------------------------------------------------------------------------------------------------------------------------------------------------------------------------------------------------------------------------------------------------------------------------------------------------------------------------------------------------------------------------------------------------------------------------------------------------------------------------------------------------------------------------------------------------------------|
|  |  |  | ENSMUSG00000039519, ENSMUSG00000024401,<br>ENSMUSG00000074622, ENSMUSG00000025746,<br>ENSMUSG00000072082, ENSMUSG00000053113,<br>ENSMUSG00000026628, ENSMUSG00000058755,<br>ENSMUSG00000073412, ENSMUSG00000018986,<br>ENSMUSG00000018899, ENSMUSG00000016529,<br>ENSMUSG00000017724, ENSMUSG00000000392,<br>ENSMUSG00000068744, ENSMUSG00000028072,<br>ENSMUSG00000018930, ENSMUSG00000026222,<br>ENSMUSG00000034652, ENSMUSG00000000182,<br>ENSMUSG00000079019, ENSMUSG00000026770,<br>ENSMUSG00000030921, ENSMUSG00000028718,<br>ENSMUSG00000035455, ENSMUSG00000022548,<br>ENSMUSG00000070691, ENSMUSG00000040627,<br>ENSMUSG0000003283, ENSMUSG00000078236,<br>ENSMUSG00000079620, ENSMUSG00000030867,<br>ENSMUSG00000016498, ENSMUSG00000024397,<br>ENSMUSG00000048806, ENSMUSG00000078817,<br>ENSMUSG00000033952, ENSMUSG00000021451,<br>ENSMUSG00000035673, ENSMUSG00000026605,<br>ENSMUSG00000024696, ENSMUSG00000029378,<br>ENSMUSG00000035385, ENSMUSG00000074651,<br>ENSMUSG0000004952, ENSMUSG00000017146,<br>ENSMUSG00000029915, ENSMUSG00000030365,<br>ENSMUSG00000073489, ENSMUSG00000026011,<br>ENSMUSG00000090272, ENSMUSG00000079227, |  |  | ENSMUSG00000063632, ENSMUSG00000032064,<br>ENSMUSG00000024386, ENSMUSG00000029019,<br>ENSMUSG00000032194, ENSMUSG00000023092,<br>ENSMUSG00000029361, ENSMUSG00000055609,<br>ENSMUSG00000073465, ENSMUSG00000024526,<br>ENSMUSG00000026532, ENSMUSG00000055653,<br>ENSMUSG00000050071, ENSMUSG00000046818,<br>ENSMUSG0000005373, ENSMUSG00000089996,<br>ENSMUSG00000032911, ENSMUSG00000024039,<br>ENSMUSG00000032558, ENSMUSG00000001134,<br>ENSMUSG0000007815, ENSMUSG00000058669,<br>ENSMUSG00000032081, ENSMUSG00000024653,<br>ENSMUSG00000058914, ENSMUSG00000020052,<br>ENSMUSG00000028036, ENSMUSG00000059668,<br>ENSMUSG00000022206, ENSMUSG00000010047 |
|--|--|--|----------------------------------------------------------------------------------------------------------------------------------------------------------------------------------------------------------------------------------------------------------------------------------------------------------------------------------------------------------------------------------------------------------------------------------------------------------------------------------------------------------------------------------------------------------------------------------------------------------------------------------------------------------------------------------------------------------------------------------------------------------------------------------------------------------------------------------------------------------------------------------------------------------------------------------------------------------------------------------------------------------------------------------------------------------------------------------------------------------------------------------------------------------|--|--|----------------------------------------------------------------------------------------------------------------------------------------------------------------------------------------------------------------------------------------------------------------------------------------------------------------------------------------------------------------------------------------------------------------------------------------------------------------------------------------------------------------------------------------------------------------------------------------------------------------------------------------------------------------|

|            |                                                                                                                                         |          |     |                                                                                                                                                                                                                                                                                                                                                                                                                                                                                      |             |     |                                                                                                                                                                                                                                                                                                           |
|------------|-----------------------------------------------------------------------------------------------------------------------------------------|----------|-----|--------------------------------------------------------------------------------------------------------------------------------------------------------------------------------------------------------------------------------------------------------------------------------------------------------------------------------------------------------------------------------------------------------------------------------------------------------------------------------------|-------------|-----|-----------------------------------------------------------------------------------------------------------------------------------------------------------------------------------------------------------------------------------------------------------------------------------------------------------|
|            |                                                                                                                                         |          |     | ENSMUSG00000049608, ENSMUSG00000037628,<br>ENSMUSG00000041324, ENSMUSG00000024014,<br>ENSMUSG00000026104, ENSMUSG00000071552,<br>ENSMUSG00000026573, ENSMUSG00000026981,<br>ENSMUSG00000025001, ENSMUSG00000045471,<br>ENSMUSG00000039981, ENSMUSG00000040829,<br>ENSMUSG00000021765, ENSMUSG00000041347,<br>ENSMUSG00000045763                                                                                                                                                      |             |     |                                                                                                                                                                                                                                                                                                           |
| GO:0002822 | regulation of adaptive immune response based on somatic recombination of immune receptors built from immunoglobulin superfamily domains | 5.56E-09 | 22  | ENSMUSG00000044701, ENSMUSG00000055170,<br>ENSMUSG00000060802, ENSMUSG00000001444,<br>ENSMUSG00000055994, ENSMUSG00000058715,<br>ENSMUSG00000026573, ENSMUSG00000049103,<br>ENSMUSG00000061232, ENSMUSG00000004296,<br>ENSMUSG00000000791, ENSMUSG00000015947,<br>ENSMUSG00000073411, ENSMUSG00000026656,<br>ENSMUSG00000079620, ENSMUSG00000024401,<br>ENSMUSG00000048806, ENSMUSG00000024339,<br>ENSMUSG00000030895, ENSMUSG00000037321,<br>ENSMUSG00000026177, ENSMUSG00000067212 | 1           | 2   | ENSMUSG00000090877, ENSMUSG00000017697                                                                                                                                                                                                                                                                    |
| GO:0051239 | regulation of multicellular organismal process                                                                                          | 1.27E-05 | 111 | ENSMUSG00000036931, ENSMUSG00000027995,<br>ENSMUSG00000027699, ENSMUSG00000006930,<br>ENSMUSG00000049103, ENSMUSG00000018899,<br>ENSMUSG00000016529, ENSMUSG00000017724,<br>ENSMUSG00000019942, ENSMUSG00000006398,<br>ENSMUSG00000021190, ENSMUSG00000028072,<br>ENSMUSG00000018930, ENSMUSG00000000817,                                                                                                                                                                            | 0.010718608 | 104 | ENSMUSG00000009471, ENSMUSG00000020123,<br>ENSMUSG00000030302, ENSMUSG00000032547,<br>ENSMUSG00000031495, ENSMUSG00000025889,<br>ENSMUSG00000046532, ENSMUSG00000023328,<br>ENSMUSG00000007122, ENSMUSG00000032511,<br>ENSMUSG00000090877, ENSMUSG00000020524,<br>ENSMUSG00000037188, ENSMUSG00000090639, |

|  |  |  |                                                                                                                                                                                                                                                                                                                                                                                                                                                                                                                                                                                                                                                                                                                                                                                                                                                                                                                                                                                                                                                                                                                                                           |  |                                                                                                                                                                                                                                                                                                                                                                                                                                                                                                                                                                                                                                                                                                                                                                                                                                                                                                                                                                                                                                                                                                                                                            |
|--|--|--|-----------------------------------------------------------------------------------------------------------------------------------------------------------------------------------------------------------------------------------------------------------------------------------------------------------------------------------------------------------------------------------------------------------------------------------------------------------------------------------------------------------------------------------------------------------------------------------------------------------------------------------------------------------------------------------------------------------------------------------------------------------------------------------------------------------------------------------------------------------------------------------------------------------------------------------------------------------------------------------------------------------------------------------------------------------------------------------------------------------------------------------------------------------|--|------------------------------------------------------------------------------------------------------------------------------------------------------------------------------------------------------------------------------------------------------------------------------------------------------------------------------------------------------------------------------------------------------------------------------------------------------------------------------------------------------------------------------------------------------------------------------------------------------------------------------------------------------------------------------------------------------------------------------------------------------------------------------------------------------------------------------------------------------------------------------------------------------------------------------------------------------------------------------------------------------------------------------------------------------------------------------------------------------------------------------------------------------------|
|  |  |  | ENSMUSG00000036896, ENSMUSG00000040296,<br>ENSMUSG00000025804, ENSMUSG00000020053,<br>ENSMUSG00000051498, ENSMUSG00000000182,<br>ENSMUSG00000044811, ENSMUSG00000034855,<br>ENSMUSG00000031551, ENSMUSG00000030921,<br>ENSMUSG00000026770, ENSMUSG00000033470,<br>ENSMUSG00000025473, ENSMUSG00000030142,<br>ENSMUSG00000044701, ENSMUSG00000045322,<br>ENSMUSG0000001444, ENSMUSG00000002992,<br>ENSMUSG00000055994, ENSMUSG00000022548,<br>ENSMUSG00000030149, ENSMUSG00000030525,<br>ENSMUSG00000040552, ENSMUSG00000041431,<br>ENSMUSG00000038357, ENSMUSG00000000982,<br>ENSMUSG00000029304, ENSMUSG00000053175,<br>ENSMUSG00000025498, ENSMUSG00000026656,<br>ENSMUSG00000030218, ENSMUSG00000050241,<br>ENSMUSG00000029075, ENSMUSG00000030793,<br>ENSMUSG00000030124, ENSMUSG00000028068,<br>ENSMUSG00000024397, ENSMUSG00000038418,<br>ENSMUSG00000048806, ENSMUSG00000042345,<br>ENSMUSG00000044583, ENSMUSG00000078817,<br>ENSMUSG00000033952, ENSMUSG00000021451,<br>ENSMUSG00000037872, ENSMUSG00000038642,<br>ENSMUSG00000047517, ENSMUSG00000029377,<br>ENSMUSG00000034730, ENSMUSG00000021266,<br>ENSMUSG00000026605, ENSMUSG00000051439, |  | ENSMUSG00000061393, ENSMUSG00000021909,<br>ENSMUSG00000039278, ENSMUSG00000026874,<br>ENSMUSG00000039004, ENSMUSG00000033208,<br>ENSMUSG00000026668, ENSMUSG00000031253,<br>ENSMUSG00000031760, ENSMUSG00000043496,<br>ENSMUSG00000010051, ENSMUSG00000017697,<br>ENSMUSG00000036867, ENSMUSG00000029193,<br>ENSMUSG00000037010, ENSMUSG00000040289,<br>ENSMUSG00000032076, ENSMUSG00000022878,<br>ENSMUSG00000024027, ENSMUSG00000064179,<br>ENSMUSG00000059201, ENSMUSG00000022868,<br>ENSMUSG00000031214, ENSMUSG00000027470,<br>ENSMUSG00000027077, ENSMUSG00000035486,<br>ENSMUSG00000091898, ENSMUSG00000001494,<br>ENSMUSG00000079434, ENSMUSG00000000049,<br>ENSMUSG00000061723, ENSMUSG00000024990,<br>ENSMUSG00000032356, ENSMUSG00000032083,<br>ENSMUSG00000049281, ENSMUSG00000059741,<br>ENSMUSG00000059481, ENSMUSG00000042903,<br>ENSMUSG00000054196, ENSMUSG00000031980,<br>ENSMUSG00000031380, ENSMUSG00000030730,<br>ENSMUSG00000025810, ENSMUSG00000049556,<br>ENSMUSG00000029368, ENSMUSG00000032366,<br>ENSMUSG00000046714, ENSMUSG00000029236,<br>ENSMUSG00000046402, ENSMUSG00000032010,<br>ENSMUSG00000024534, ENSMUSG00000021319, |
|--|--|--|-----------------------------------------------------------------------------------------------------------------------------------------------------------------------------------------------------------------------------------------------------------------------------------------------------------------------------------------------------------------------------------------------------------------------------------------------------------------------------------------------------------------------------------------------------------------------------------------------------------------------------------------------------------------------------------------------------------------------------------------------------------------------------------------------------------------------------------------------------------------------------------------------------------------------------------------------------------------------------------------------------------------------------------------------------------------------------------------------------------------------------------------------------------|--|------------------------------------------------------------------------------------------------------------------------------------------------------------------------------------------------------------------------------------------------------------------------------------------------------------------------------------------------------------------------------------------------------------------------------------------------------------------------------------------------------------------------------------------------------------------------------------------------------------------------------------------------------------------------------------------------------------------------------------------------------------------------------------------------------------------------------------------------------------------------------------------------------------------------------------------------------------------------------------------------------------------------------------------------------------------------------------------------------------------------------------------------------------|

|            |                                                    |             |    |                                                                                                                                                                                                                                                                                                                                                                                                                                                                                                                                                                                                                                                                                                                                                                                                                                                                                                                                           |   |   |                                                                                                                                                                                                                                                                                                                                                                                                                                                                                                                                                                                                                                                                                                                                                                                               |
|------------|----------------------------------------------------|-------------|----|-------------------------------------------------------------------------------------------------------------------------------------------------------------------------------------------------------------------------------------------------------------------------------------------------------------------------------------------------------------------------------------------------------------------------------------------------------------------------------------------------------------------------------------------------------------------------------------------------------------------------------------------------------------------------------------------------------------------------------------------------------------------------------------------------------------------------------------------------------------------------------------------------------------------------------------------|---|---|-----------------------------------------------------------------------------------------------------------------------------------------------------------------------------------------------------------------------------------------------------------------------------------------------------------------------------------------------------------------------------------------------------------------------------------------------------------------------------------------------------------------------------------------------------------------------------------------------------------------------------------------------------------------------------------------------------------------------------------------------------------------------------------------------|
|            |                                                    |             |    | <p>ENSMUSG00000074115, ENSMUSG00000029378, ENSMUSG00000035385, ENSMUSG00000032691, ENSMUSG00000020641, ENSMUSG00000028874, ENSMUSG00000029915, ENSMUSG00000073489, ENSMUSG00000030365, ENSMUSG00000026011, ENSMUSG00000027398, ENSMUSG00000059089, ENSMUSG00000079227, ENSMUSG00000030117, ENSMUSG00000049608, ENSMUSG00000041324, ENSMUSG00000055170, ENSMUSG00000028602, ENSMUSG00000026104, ENSMUSG00000022838, ENSMUSG00000035042, ENSMUSG00000058715, ENSMUSG00000071552, ENSMUSG00000026573, ENSMUSG00000004296, ENSMUSG00000026981, ENSMUSG00000000791, ENSMUSG00000022901, ENSMUSG00000018486, ENSMUSG00000029371, ENSMUSG00000041515, ENSMUSG00000045471, ENSMUSG00000044827, ENSMUSG00000037440, ENSMUSG00000034394, ENSMUSG00000036986, ENSMUSG00000024401, ENSMUSG00000074622, ENSMUSG00000021765, ENSMUSG00000028971, ENSMUSG00000026580, ENSMUSG00000037868, ENSMUSG00000025746, ENSMUSG00000026177, ENSMUSG00000054136</p> |   |   | <p>ENSMUSG00000033577, ENSMUSG00000032554, ENSMUSG00000024028, ENSMUSG00000041688, ENSMUSG00000020427, ENSMUSG00000031431, ENSMUSG00000022996, ENSMUSG00000031489, ENSMUSG00000061086, ENSMUSG00000032216, ENSMUSG00000048142, ENSMUSG00000063632, ENSMUSG00000032064, ENSMUSG00000024386, ENSMUSG00000029361, ENSMUSG00000073465, ENSMUSG00000038119, ENSMUSG00000073424, ENSMUSG00000024526, ENSMUSG00000040752, ENSMUSG00000040533, ENSMUSG00000050071, ENSMUSG00000035458, ENSMUSG00000032911, ENSMUSG00000007815, ENSMUSG00000025991, ENSMUSG00000053093, ENSMUSG00000000889, ENSMUSG00000038239, ENSMUSG00000029669, ENSMUSG00000031144, ENSMUSG00000031097, ENSMUSG00000032081, ENSMUSG00000024653, ENSMUSG00000062778, ENSMUSG00000020052, ENSMUSG00000026418, ENSMUSG00000010047</p> |
| GO:0032729 | positive regulation of interferon-gamma production | 0.000286938 | 10 | <p>ENSMUSG00000050241, ENSMUSG00000041515, ENSMUSG00000024401, ENSMUSG00000030149, ENSMUSG00000027398, ENSMUSG00000049103,</p>                                                                                                                                                                                                                                                                                                                                                                                                                                                                                                                                                                                                                                                                                                                                                                                                            | 1 | 0 |                                                                                                                                                                                                                                                                                                                                                                                                                                                                                                                                                                                                                                                                                                                                                                                               |

|            |                                        |                 |    |                                                                                                                                                                                                                                                                                                                                                                                                                                                                                                                                                                                                                                                                                                                                                                                                                                                                                                                                                                                                                         |   |    |                                                                                                                                                                                                                                                                                                                                                                                                                                                                                                                                                                                                                                                                                                                                                                               |
|------------|----------------------------------------|-----------------|----|-------------------------------------------------------------------------------------------------------------------------------------------------------------------------------------------------------------------------------------------------------------------------------------------------------------------------------------------------------------------------------------------------------------------------------------------------------------------------------------------------------------------------------------------------------------------------------------------------------------------------------------------------------------------------------------------------------------------------------------------------------------------------------------------------------------------------------------------------------------------------------------------------------------------------------------------------------------------------------------------------------------------------|---|----|-------------------------------------------------------------------------------------------------------------------------------------------------------------------------------------------------------------------------------------------------------------------------------------------------------------------------------------------------------------------------------------------------------------------------------------------------------------------------------------------------------------------------------------------------------------------------------------------------------------------------------------------------------------------------------------------------------------------------------------------------------------------------------|
|            |                                        |                 |    | ENSMUSG0000004296, ENSMUSG00000053175,<br>ENSMUSG00000026177, ENSMUSG00000000791                                                                                                                                                                                                                                                                                                                                                                                                                                                                                                                                                                                                                                                                                                                                                                                                                                                                                                                                        |   |    |                                                                                                                                                                                                                                                                                                                                                                                                                                                                                                                                                                                                                                                                                                                                                                               |
| GO:0060341 | regulation of cellular<br>localization | 0.00102490<br>1 | 46 | ENSMUSG00000058755, ENSMUSG00000024112,<br>ENSMUSG00000027995, ENSMUSG00000024791,<br>ENSMUSG00000071005, ENSMUSG00000027699,<br>ENSMUSG00000049103, ENSMUSG00000051439,<br>ENSMUSG00000074115, ENSMUSG00000016529,<br>ENSMUSG00000032691, ENSMUSG00000019942,<br>ENSMUSG00000045328, ENSMUSG00000020848,<br>ENSMUSG0000002055, ENSMUSG00000029915,<br>ENSMUSG00000028874, ENSMUSG00000040296,<br>ENSMUSG00000034652, ENSMUSG00000020053,<br>ENSMUSG00000027398, ENSMUSG00000000182,<br>ENSMUSG00000044811, ENSMUSG00000079227,<br>ENSMUSG00000041324, ENSMUSG00000030142,<br>ENSMUSG00000055170, ENSMUSG00000045322,<br>ENSMUSG00000022548, ENSMUSG00000055994,<br>ENSMUSG00000058715, ENSMUSG00000024349,<br>ENSMUSG00000030525, ENSMUSG00000041431,<br>ENSMUSG00000037313, ENSMUSG00000000982,<br>ENSMUSG00000023015, ENSMUSG00000026981,<br>ENSMUSG00000029075, ENSMUSG00000030793,<br>ENSMUSG00000045471, ENSMUSG00000034394,<br>ENSMUSG00000024401, ENSMUSG00000044583,<br>ENSMUSG00000025746, ENSMUSG00000078817 | 1 | 35 | ENSMUSG00000020123, ENSMUSG00000031495,<br>ENSMUSG00000025889, ENSMUSG00000040147,<br>ENSMUSG00000055980, ENSMUSG00000046532,<br>ENSMUSG00000007122, ENSMUSG00000029236,<br>ENSMUSG00000024534, ENSMUSG00000021909,<br>ENSMUSG00000026874, ENSMUSG00000033595,<br>ENSMUSG00000032216, ENSMUSG00000032060,<br>ENSMUSG00000063632, ENSMUSG00000029193,<br>ENSMUSG00000037010, ENSMUSG00000029361,<br>ENSMUSG00000073465, ENSMUSG00000032076,<br>ENSMUSG00000022878, ENSMUSG00000024027,<br>ENSMUSG00000024526, ENSMUSG00000042812,<br>ENSMUSG00000059201, ENSMUSG00000034584,<br>ENSMUSG00000027470, ENSMUSG00000091898,<br>ENSMUSG00000059327, ENSMUSG00000024990,<br>ENSMUSG00000025812, ENSMUSG00000032083,<br>ENSMUSG00000062778, ENSMUSG00000031980,<br>ENSMUSG00000010047 |
| GO:0050866 | negative regulation of cell            | 0.00018007      | 18 | ENSMUSG00000016496, ENSMUSG00000036931,                                                                                                                                                                                                                                                                                                                                                                                                                                                                                                                                                                                                                                                                                                                                                                                                                                                                                                                                                                                 | 1 | 4  | ENSMUSG00000063632, ENSMUSG00000042812,                                                                                                                                                                                                                                                                                                                                                                                                                                                                                                                                                                                                                                                                                                                                       |

|            |                                         |                 |    |                                                                                                                                                                                                                                                                                                                                                                                                                                                                                                                                        |   |   |                                                                                                    |
|------------|-----------------------------------------|-----------------|----|----------------------------------------------------------------------------------------------------------------------------------------------------------------------------------------------------------------------------------------------------------------------------------------------------------------------------------------------------------------------------------------------------------------------------------------------------------------------------------------------------------------------------------------|---|---|----------------------------------------------------------------------------------------------------|
|            | activation                              | 1               |    | ENSMUSG00000040528, ENSMUSG00000073412, ENSMUSG00000027843, ENSMUSG00000071552, ENSMUSG00000026573, ENSMUSG00000049103, ENSMUSG00000016529, ENSMUSG00000026656, ENSMUSG00000030124, ENSMUSG00000016498, ENSMUSG00000022876, ENSMUSG00000026011, ENSMUSG00000048806, ENSMUSG00000034652, ENSMUSG00000031551, ENSMUSG00000026770                                                                                                                                                                                                         |   |   | ENSMUSG00000024653, ENSMUSG00000024028                                                             |
| GO:0050688 | regulation of defense response to virus | 0.00280273<br>3 | 8  | ENSMUSG00000035042, ENSMUSG00000036986, ENSMUSG00000024349, ENSMUSG00000040296, ENSMUSG00000004296, ENSMUSG00000026770, ENSMUSG00000000791, ENSMUSG00000034459                                                                                                                                                                                                                                                                                                                                                                         | 1 | 0 |                                                                                                    |
| GO:0031349 | positive regulation of defense response | 1.35E-09        | 26 | ENSMUSG00000005696, ENSMUSG00000027995, ENSMUSG00000045322, ENSMUSG00000035042, ENSMUSG00000055994, ENSMUSG00000058715, ENSMUSG00000030149, ENSMUSG00000029377, ENSMUSG00000024349, ENSMUSG00000026573, ENSMUSG00000049103, ENSMUSG00000000982, ENSMUSG00000004296, ENSMUSG00000015947, ENSMUSG00000022901, ENSMUSG00000050241, ENSMUSG00000030413, ENSMUSG00000030124, ENSMUSG00000024401, ENSMUSG00000025746, ENSMUSG00000044583, ENSMUSG00000051498, ENSMUSG00000027398, ENSMUSG00000079227, ENSMUSG00000031551, ENSMUSG00000025473 | 1 | 5 | ENSMUSG00000019326, ENSMUSG00000062515, ENSMUSG00000043496, ENSMUSG00000032076, ENSMUSG00000010047 |
| GO:0002275 | myeloid cell activation                 | 1.41E-05        | 11 | ENSMUSG00000040528, ENSMUSG00000027995,                                                                                                                                                                                                                                                                                                                                                                                                                                                                                                | 1 | 0 |                                                                                                    |



|            |                                                                                                         |                 |    |                                                                                                                                                                                                                   |             |    |                                                                                                                                                                                                                                       |
|------------|---------------------------------------------------------------------------------------------------------|-----------------|----|-------------------------------------------------------------------------------------------------------------------------------------------------------------------------------------------------------------------|-------------|----|---------------------------------------------------------------------------------------------------------------------------------------------------------------------------------------------------------------------------------------|
|            | involved in immune response                                                                             |                 |    | ENSMUSG00000045322, ENSMUSG000000055994, ENSMUSG000000040751, ENSMUSG000000035673, ENSMUSG000000058715, ENSMUSG000000034652, ENSMUSG000000044583, ENSMUSG000000051498, ENSMUSG00000000982                         |             |    |                                                                                                                                                                                                                                       |
| GO:0055010 | ventricular cardiac muscle tissue morphogenesis                                                         | 1               | 0  |                                                                                                                                                                                                                   | 0.000277834 | 11 | ENSMUSG000000035458, ENSMUSG000000032366, ENSMUSG000000046714, ENSMUSG000000059741, ENSMUSG000000091898, ENSMUSG000000053093, ENSMUSG000000006235, ENSMUSG000000026418, ENSMUSG000000021909, ENSMUSG000000040289, ENSMUSG000000040752 |
| GO:0052510 | positive regulation by organism of defense response of other organism involved in symbiotic interaction | 0.00351362<br>7 | 5  | ENSMUSG000000027995, ENSMUSG000000045322, ENSMUSG000000044583, ENSMUSG000000051498, ENSMUSG000000055994                                                                                                           | 1           | 0  |                                                                                                                                                                                                                                       |
| GO:0002707 | negative regulation of lymphocyte mediated immunity                                                     | 5.71E-06        | 10 | ENSMUSG000000026656, ENSMUSG000000050241, ENSMUSG000000055994, ENSMUSG000000079298, ENSMUSG000000079620, ENSMUSG000000024339, ENSMUSG000000048806, ENSMUSG000000026573, ENSMUSG000000073406, ENSMUSG000000037321  | 1           | 0  |                                                                                                                                                                                                                                       |
| GO:0032880 | regulation of protein localization                                                                      | 1.50E-05        | 35 | ENSMUSG000000027995, ENSMUSG000000024791, ENSMUSG000000071005, ENSMUSG000000027699, ENSMUSG000000051439, ENSMUSG000000074115, ENSMUSG000000016529, ENSMUSG000000032691, ENSMUSG000000019942, ENSMUSG000000045328, | 1           | 13 | ENSMUSG000000024990, ENSMUSG000000034584, ENSMUSG000000031495, ENSMUSG000000059201, ENSMUSG000000032083, ENSMUSG000000046532, ENSMUSG000000062778, ENSMUSG000000059327, ENSMUSG000000026874, ENSMUSG000000032076,                     |

|            |                       |          |    |                                                                                                                                                                                                                                                                                                                                                                                                                                                                                                                                                                                                            |   |    |                                                                                                                                                                                                                                   |
|------------|-----------------------|----------|----|------------------------------------------------------------------------------------------------------------------------------------------------------------------------------------------------------------------------------------------------------------------------------------------------------------------------------------------------------------------------------------------------------------------------------------------------------------------------------------------------------------------------------------------------------------------------------------------------------------|---|----|-----------------------------------------------------------------------------------------------------------------------------------------------------------------------------------------------------------------------------------|
|            |                       |          |    | <p>ENSMUSG0000002055, ENSMUSG00000029915,<br/> ENSMUSG00000028874, ENSMUSG00000040296,<br/> ENSMUSG00000020053, ENSMUSG00000027398,<br/> ENSMUSG00000020651, ENSMUSG00000044811,<br/> ENSMUSG00000079227, ENSMUSG00000030142,<br/> ENSMUSG00000055170, ENSMUSG00000045322,<br/> ENSMUSG00000022548, ENSMUSG00000055994,<br/> ENSMUSG00000024349, ENSMUSG00000041431,<br/> ENSMUSG00000037313, ENSMUSG00000000982,<br/> ENSMUSG00000023015, ENSMUSG00000030793,<br/> ENSMUSG00000029075, ENSMUSG00000024401,<br/> ENSMUSG00000025746, ENSMUSG00000044583,<br/> ENSMUSG00000078817</p>                       |   |    | <p>ENSMUSG00000022878, ENSMUSG00000010047,<br/> ENSMUSG00000024526</p>                                                                                                                                                            |
| GO:0009617 | response to bacterium | 5.39E-22 | 56 | <p>ENSMUSG00000024079, ENSMUSG00000060802,<br/> ENSMUSG00000027995, ENSMUSG00000058427,<br/> ENSMUSG00000029298, ENSMUSG00000079563,<br/> ENSMUSG00000061232, ENSMUSG00000051439,<br/> ENSMUSG00000016529, ENSMUSG00000035385,<br/> ENSMUSG00000020638, ENSMUSG00000030413,<br/> ENSMUSG00000028874, ENSMUSG00000070034,<br/> ENSMUSG00000040253, ENSMUSG00000025804,<br/> ENSMUSG00000027398, ENSMUSG00000051498,<br/> ENSMUSG00000059089, ENSMUSG00000054072,<br/> ENSMUSG00000079227, ENSMUSG00000031551,<br/> ENSMUSG00000028362, ENSMUSG00000055170,<br/> ENSMUSG00000028269, ENSMUSG00000069874,</p> | 1 | 10 | <p>ENSMUSG00000020889, ENSMUSG00000031495,<br/> ENSMUSG00000025889, ENSMUSG00000059230,<br/> ENSMUSG00000028036, ENSMUSG00000037071,<br/> ENSMUSG00000036216, ENSMUSG00000025991,<br/> ENSMUSG00000056978, ENSMUSG00000035459</p> |

|            |                               |          |    |                                                                                                                                                                                                                                                                                                                                                                                                                                                                                                                                                                                                                                                               |   |   |                                                                                   |
|------------|-------------------------------|----------|----|---------------------------------------------------------------------------------------------------------------------------------------------------------------------------------------------------------------------------------------------------------------------------------------------------------------------------------------------------------------------------------------------------------------------------------------------------------------------------------------------------------------------------------------------------------------------------------------------------------------------------------------------------------------|---|---|-----------------------------------------------------------------------------------|
|            |                               |          |    | ENSMUSG00000045322, ENSMUSG00000026104,<br>ENSMUSG00000079362, ENSMUSG00000055994,<br>ENSMUSG00000035042, ENSMUSG00000056529,<br>ENSMUSG00000058715, ENSMUSG00000030149,<br>ENSMUSG00000028270, ENSMUSG00000038357,<br>ENSMUSG0000000982, ENSMUSG0000004296,<br>ENSMUSG00000076612, ENSMUSG00000053175,<br>ENSMUSG00000015947, ENSMUSG00000026656,<br>ENSMUSG00000041515, ENSMUSG00000044827,<br>ENSMUSG00000023078, ENSMUSG00000029371,<br>ENSMUSG0000003283, ENSMUSG00000028268,<br>ENSMUSG00000024401, ENSMUSG00000054588,<br>ENSMUSG00000024339, ENSMUSG00000048806,<br>ENSMUSG00000041347, ENSMUSG00000022126,<br>ENSMUSG00000053219, ENSMUSG00000026177 |   |   |                                                                                   |
| GO:0002253 | activation of immune response | 4.17E-08 | 25 | ENSMUSG00000036905, ENSMUSG00000074148,<br>ENSMUSG00000027995, ENSMUSG00000045322,<br>ENSMUSG00000027843, ENSMUSG00000036887,<br>ENSMUSG00000055994, ENSMUSG00000040751,<br>ENSMUSG00000092005, ENSMUSG00000058715,<br>ENSMUSG00000030149, ENSMUSG00000024349,<br>ENSMUSG00000040552, ENSMUSG00000024371,<br>ENSMUSG00000055172, ENSMUSG00000022901,<br>ENSMUSG00000050241, ENSMUSG00000030413,<br>ENSMUSG00000030365, ENSMUSG00000026011,<br>ENSMUSG00000090231, ENSMUSG00000044583,                                                                                                                                                                         | 1 | 4 | ENSMUSG00000046834, ENSMUSG00000061780,<br>ENSMUSG00000043496, ENSMUSG00000026874 |

|            |                                           |                 |    |                                                                                                                                                                                                                                                                                                                                                                             |             |   |                                                                                                                              |
|------------|-------------------------------------------|-----------------|----|-----------------------------------------------------------------------------------------------------------------------------------------------------------------------------------------------------------------------------------------------------------------------------------------------------------------------------------------------------------------------------|-------------|---|------------------------------------------------------------------------------------------------------------------------------|
|            |                                           |                 |    | ENSMUSG00000051498, ENSMUSG00000049109,<br>ENSMUSG00000025473                                                                                                                                                                                                                                                                                                               |             |   |                                                                                                                              |
| GO:0043900 | regulation of multi-organism<br>process   | 3.48E-07        | 17 | ENSMUSG00000055170, ENSMUSG00000027995,<br>ENSMUSG00000035042, ENSMUSG00000055994,<br>ENSMUSG00000024349, ENSMUSG00000016529,<br>ENSMUSG00000038357, ENSMUSG00000004296,<br>ENSMUSG00000000791, ENSMUSG000000041515,<br>ENSMUSG00000029371, ENSMUSG00000036986,<br>ENSMUSG00000024401, ENSMUSG00000040296,<br>ENSMUSG00000079227, ENSMUSG00000026770,<br>ENSMUSG00000034459 | 1           | 2 | ENSMUSG00000017697, ENSMUSG00000037071                                                                                       |
| GO:0032675 | regulation of interleukin-6<br>production | 7.65E-07        | 17 | ENSMUSG00000055170, ENSMUSG00000027995,<br>ENSMUSG00000045322, ENSMUSG00000055994,<br>ENSMUSG00000058715, ENSMUSG00000029377,<br>ENSMUSG00000030525, ENSMUSG00000016529,<br>ENSMUSG00000044827, ENSMUSG00000024401,<br>ENSMUSG00000025746, ENSMUSG00000044583,<br>ENSMUSG00000027398, ENSMUSG00000051498,<br>ENSMUSG00000078817, ENSMUSG00000079227,<br>ENSMUSG00000030921  | 1           | 2 | ENSMUSG00000031380, ENSMUSG00000010047                                                                                       |
| GO:0031342 | negative regulation of cell<br>killing    | 0.00916696<br>9 | 6  | ENSMUSG00000024339, ENSMUSG00000050241,<br>ENSMUSG00000073406, ENSMUSG00000037321,<br>ENSMUSG00000079298, ENSMUSG00000079620                                                                                                                                                                                                                                                | 1           | 0 |                                                                                                                              |
| GO:0003009 | skeletal muscle contraction               | 1               | 0  |                                                                                                                                                                                                                                                                                                                                                                             | 0.001589427 | 6 | ENSMUSG00000061723, ENSMUSG00000031097,<br>ENSMUSG00000091898, ENSMUSG00000064179,<br>ENSMUSG00000021909, ENSMUSG00000017300 |

|            |                                          |                 |    |                                                                                                                                                                                                                                                                                                                                                                                                                                                                                                                                       |   |   |                                                                                                                                            |
|------------|------------------------------------------|-----------------|----|---------------------------------------------------------------------------------------------------------------------------------------------------------------------------------------------------------------------------------------------------------------------------------------------------------------------------------------------------------------------------------------------------------------------------------------------------------------------------------------------------------------------------------------|---|---|--------------------------------------------------------------------------------------------------------------------------------------------|
| GO:0050870 | positive regulation of T cell activation | 0.00280397<br>5 | 17 | ENSMUSG00000055170, ENSMUSG00000035042, ENSMUSG00000026573, ENSMUSG00000049103, ENSMUSG00000035385, ENSMUSG00000004296, ENSMUSG00000000791, ENSMUSG00000022901, ENSMUSG00000037440, ENSMUSG00000075122, ENSMUSG00000016498, ENSMUSG00000024397, ENSMUSG00000025746, ENSMUSG00000020053, ENSMUSG00000027398, ENSMUSG00000026770, ENSMUSG00000025473                                                                                                                                                                                    | 1 | 2 | ENSMUSG00000026532, ENSMUSG00000017697                                                                                                     |
| GO:0045123 | cellular extravasation                   | 0.00124506      | 7  | ENSMUSG00000026580, ENSMUSG00000049103, ENSMUSG00000026582, ENSMUSG00000035385, ENSMUSG00000035042, ENSMUSG00000030786, ENSMUSG00000024401                                                                                                                                                                                                                                                                                                                                                                                            | 1 | 0 |                                                                                                                                            |
| GO:0001775 | cell activation                          | 2.84E-11        | 49 | ENSMUSG00000060802, ENSMUSG00000040528, ENSMUSG00000074148, ENSMUSG00000027995, ENSMUSG00000035673, ENSMUSG00000071005, ENSMUSG00000071068, ENSMUSG00000018899, ENSMUSG00000053977, ENSMUSG00000028072, ENSMUSG00000062007, ENSMUSG00000030786, ENSMUSG00000034652, ENSMUSG00000051498, ENSMUSG00000059089, ENSMUSG00000028362, ENSMUSG00000055170, ENSMUSG00000068227, ENSMUSG00000045322, ENSMUSG00000027843, ENSMUSG0000001444, ENSMUSG00000040751, ENSMUSG00000055994, ENSMUSG00000035042, ENSMUSG00000039748, ENSMUSG0000002699, | 1 | 7 | ENSMUSG00000064201, ENSMUSG00000033831, ENSMUSG00000025889, ENSMUSG00000031980, ENSMUSG00000061311, ENSMUSG00000010047, ENSMUSG00000017697 |

|            |                                                                                                                                          |          |    |                                                                                                                                                                                                                                                                                                                                                                                                                                                                                                           |   |    |                                                                                                                               |
|------------|------------------------------------------------------------------------------------------------------------------------------------------|----------|----|-----------------------------------------------------------------------------------------------------------------------------------------------------------------------------------------------------------------------------------------------------------------------------------------------------------------------------------------------------------------------------------------------------------------------------------------------------------------------------------------------------------|---|----|-------------------------------------------------------------------------------------------------------------------------------|
|            |                                                                                                                                          |          |    | ENSMUSG00000035186, ENSMUSG00000058715,<br>ENSMUSG00000030149, ENSMUSG00000030525,<br>ENSMUSG00000026573, ENSMUSG00000040627,<br>ENSMUSG0000000982, ENSMUSG0000004296,<br>ENSMUSG00000053175, ENSMUSG00000025001,<br>ENSMUSG00000022901, ENSMUSG00000050241,<br>ENSMUSG00000029075, ENSMUSG00000044827,<br>ENSMUSG00000001131, ENSMUSG00000034116,<br>ENSMUSG00000024401, ENSMUSG00000038418,<br>ENSMUSG00000058818, ENSMUSG00000044583,<br>ENSMUSG00000025746, ENSMUSG00000049109,<br>ENSMUSG00000026177 |   |    |                                                                                                                               |
| GO:0002460 | adaptive immune response<br>based on somatic<br>recombination of immune<br>receptors built from<br>immunoglobulin superfamily<br>domains | 1.76E-08 | 22 | ENSMUSG00000036905, ENSMUSG00000070427,<br>ENSMUSG00000036887, ENSMUSG00000055994,<br>ENSMUSG00000092005, ENSMUSG00000039748,<br>ENSMUSG00000058715, ENSMUSG00000040552,<br>ENSMUSG00000026573, ENSMUSG00000040627,<br>ENSMUSG00000024371, ENSMUSG00000015437,<br>ENSMUSG00000053977, ENSMUSG00000076612,<br>ENSMUSG00000055172, ENSMUSG00000053175,<br>ENSMUSG00000015947, ENSMUSG00000025498,<br>ENSMUSG00000026656, ENSMUSG00000058818,<br>ENSMUSG00000051498, ENSMUSG00000026177                      | 1 | 0  |                                                                                                                               |
| GO:0048584 | positive regulation of<br>response to stimulus                                                                                           | 3.67E-10 | 83 | ENSMUSG00000060802, ENSMUSG00000058755,<br>ENSMUSG00000027995, ENSMUSG00000036887,<br>ENSMUSG00000027699, ENSMUSG00000049103,                                                                                                                                                                                                                                                                                                                                                                             | 1 | 44 | ENSMUSG00000031380, ENSMUSG00000032547,<br>ENSMUSG00000029368, ENSMUSG00000062515,<br>ENSMUSG00000061780, ENSMUSG00000055980, |

|  |  |  |                                                                                                                                                                                                                                                                                                                                                                                                                                                                                                                                                                                                                                                                                                                                                                                                                                                                                                                                                                                                                                                                                                                                                            |  |  |                                                                                                                                                                                                                                                                                                                                                                                                                                                                                                                                                                                                                                                                                                                                                                                                                                              |
|--|--|--|------------------------------------------------------------------------------------------------------------------------------------------------------------------------------------------------------------------------------------------------------------------------------------------------------------------------------------------------------------------------------------------------------------------------------------------------------------------------------------------------------------------------------------------------------------------------------------------------------------------------------------------------------------------------------------------------------------------------------------------------------------------------------------------------------------------------------------------------------------------------------------------------------------------------------------------------------------------------------------------------------------------------------------------------------------------------------------------------------------------------------------------------------------|--|--|----------------------------------------------------------------------------------------------------------------------------------------------------------------------------------------------------------------------------------------------------------------------------------------------------------------------------------------------------------------------------------------------------------------------------------------------------------------------------------------------------------------------------------------------------------------------------------------------------------------------------------------------------------------------------------------------------------------------------------------------------------------------------------------------------------------------------------------------|
|  |  |  | ENSMUSG00000061232, ENSMUSG00000053977,<br>ENSMUSG00000022831, ENSMUSG00000028072,<br>ENSMUSG00000018930, ENSMUSG00000000817,<br>ENSMUSG00000001123, ENSMUSG00000028071,<br>ENSMUSG00000025804, ENSMUSG00000020053,<br>ENSMUSG00000046718, ENSMUSG00000030895,<br>ENSMUSG00000051498, ENSMUSG00000000182,<br>ENSMUSG00000037321, ENSMUSG00000034855,<br>ENSMUSG00000031551, ENSMUSG00000033470,<br>ENSMUSG00000025473, ENSMUSG00000005696,<br>ENSMUSG00000045322, ENSMUSG00000055994,<br>ENSMUSG00000040751, ENSMUSG00000030149,<br>ENSMUSG00000040552, ENSMUSG00000035373,<br>ENSMUSG00000024371, ENSMUSG00000000982,<br>ENSMUSG00000055172, ENSMUSG00000023913,<br>ENSMUSG00000050241, ENSMUSG00000030124,<br>ENSMUSG00000024397, ENSMUSG00000044583,<br>ENSMUSG00000033952, ENSMUSG00000021451,<br>ENSMUSG00000074148, ENSMUSG00000036905,<br>ENSMUSG00000074151, ENSMUSG00000071005,<br>ENSMUSG00000031444, ENSMUSG00000029377,<br>ENSMUSG00000035385, ENSMUSG00000073411,<br>ENSMUSG00000030413, ENSMUSG00000062007,<br>ENSMUSG00000017146, ENSMUSG00000028874,<br>ENSMUSG00000030365, ENSMUSG00000026011,<br>ENSMUSG00000027398, ENSMUSG00000079227, |  |  | ENSMUSG00000046532, ENSMUSG00000046714,<br>ENSMUSG00000090877, ENSMUSG00000031841,<br>ENSMUSG00000021319, ENSMUSG00000061393,<br>ENSMUSG00000024028, ENSMUSG00000026874,<br>ENSMUSG00000039004, ENSMUSG00000033208,<br>ENSMUSG00000021055, ENSMUSG00000005705,<br>ENSMUSG00000020427, ENSMUSG00000022996,<br>ENSMUSG00000031489, ENSMUSG00000031760,<br>ENSMUSG00000029195, ENSMUSG00000043496,<br>ENSMUSG00000032216, ENSMUSG00000017697,<br>ENSMUSG00000063632, ENSMUSG00000032064,<br>ENSMUSG00000046834, ENSMUSG00000073465,<br>ENSMUSG00000038119, ENSMUSG00000032076,<br>ENSMUSG00000022878, ENSMUSG00000025860,<br>ENSMUSG00000059201, ENSMUSG00000055653,<br>ENSMUSG00000019326, ENSMUSG00000032570,<br>ENSMUSG00000025386, ENSMUSG00000059327,<br>ENSMUSG00000058914, ENSMUSG00000020052,<br>ENSMUSG00000031980, ENSMUSG00000010047 |
|--|--|--|------------------------------------------------------------------------------------------------------------------------------------------------------------------------------------------------------------------------------------------------------------------------------------------------------------------------------------------------------------------------------------------------------------------------------------------------------------------------------------------------------------------------------------------------------------------------------------------------------------------------------------------------------------------------------------------------------------------------------------------------------------------------------------------------------------------------------------------------------------------------------------------------------------------------------------------------------------------------------------------------------------------------------------------------------------------------------------------------------------------------------------------------------------|--|--|----------------------------------------------------------------------------------------------------------------------------------------------------------------------------------------------------------------------------------------------------------------------------------------------------------------------------------------------------------------------------------------------------------------------------------------------------------------------------------------------------------------------------------------------------------------------------------------------------------------------------------------------------------------------------------------------------------------------------------------------------------------------------------------------------------------------------------------------|

|            |                                                                |                 |    |                                                                                                                                                                                                                                                                                                                                                                                                                                                                                                                                                        |   |   |                                                               |
|------------|----------------------------------------------------------------|-----------------|----|--------------------------------------------------------------------------------------------------------------------------------------------------------------------------------------------------------------------------------------------------------------------------------------------------------------------------------------------------------------------------------------------------------------------------------------------------------------------------------------------------------------------------------------------------------|---|---|---------------------------------------------------------------|
|            |                                                                |                 |    | ENSMUSG00000049608, ENSMUSG00000067212,<br>ENSMUSG00000055170, ENSMUSG00000057135,<br>ENSMUSG00000027843, ENSMUSG00000092005,<br>ENSMUSG00000035042, ENSMUSG00000035186,<br>ENSMUSG00000058715, ENSMUSG00000024349,<br>ENSMUSG00000026573, ENSMUSG00000004296,<br>ENSMUSG00000000791, ENSMUSG00000015947,<br>ENSMUSG00000022901, ENSMUSG00000023078,<br>ENSMUSG00000034394, ENSMUSG00000036986,<br>ENSMUSG00000024401, ENSMUSG00000090231,<br>ENSMUSG00000024339, ENSMUSG00000025746,<br>ENSMUSG00000049109, ENSMUSG00000026177,<br>ENSMUSG00000025165 |   |   |                                                               |
| GO:0002230 | positive regulation of<br>defense response to virus by<br>host | 0.00051139<br>6 | 6  | ENSMUSG00000024349, ENSMUSG00000040296,<br>ENSMUSG00000004296, ENSMUSG00000035042,<br>ENSMUSG00000000791, ENSMUSG00000036986                                                                                                                                                                                                                                                                                                                                                                                                                           | 1 | 0 |                                                               |
| GO:0050863 | regulation of T cell<br>activation                             | 6.42E-07        | 27 | ENSMUSG00000016496, ENSMUSG00000044701,<br>ENSMUSG00000036931, ENSMUSG00000055170,<br>ENSMUSG00000027843, ENSMUSG00000035042,<br>ENSMUSG00000071552, ENSMUSG00000026573,<br>ENSMUSG00000049103, ENSMUSG00000035385,<br>ENSMUSG00000004296, ENSMUSG00000000791,<br>ENSMUSG00000022901, ENSMUSG00000030124,<br>ENSMUSG00000037440, ENSMUSG00000075122,<br>ENSMUSG00000016498, ENSMUSG00000030365,<br>ENSMUSG00000026011, ENSMUSG00000024397,                                                                                                             | 1 | 3 | ENSMUSG00000024653, ENSMUSG00000026532,<br>ENSMUSG00000017697 |



|            |                                                       |                 |    |                                                                                                                                                                                                                                                                                                                                                                            |          |   |                                                                                                                                                                                                |
|------------|-------------------------------------------------------|-----------------|----|----------------------------------------------------------------------------------------------------------------------------------------------------------------------------------------------------------------------------------------------------------------------------------------------------------------------------------------------------------------------------|----------|---|------------------------------------------------------------------------------------------------------------------------------------------------------------------------------------------------|
|            |                                                       |                 |    | ENSMUSG00000048806, ENSMUSG00000025746,<br>ENSMUSG00000020053, ENSMUSG00000027398,<br>ENSMUSG00000031551, ENSMUSG00000026770,<br>ENSMUSG00000025473                                                                                                                                                                                                                        |          |   |                                                                                                                                                                                                |
| GO:0015671 | oxygen transport                                      | 1               | 0  |                                                                                                                                                                                                                                                                                                                                                                            | 5.21E-09 | 9 | ENSMUSG00000020295, ENSMUSG00000073063,<br>ENSMUSG00000078621, ENSMUSG00000018893,<br>ENSMUSG00000021032, ENSMUSG00000055609,<br>ENSMUSG00000052305, ENSMUSG00000052187,<br>ENSMUSG00000052217 |
| GO:0002675 | positive regulation of acute<br>inflammatory response | 0.00577935<br>2 | 8  | ENSMUSG00000035042, ENSMUSG00000024401,<br>ENSMUSG00000058715, ENSMUSG00000025746,<br>ENSMUSG00000027398, ENSMUSG00000079227,<br>ENSMUSG00000025473, ENSMUSG00000015947                                                                                                                                                                                                    | 1        | 0 |                                                                                                                                                                                                |
| GO:0072678 | T cell migration                                      | 0.00472930<br>9 | 4  | ENSMUSG00000050232, ENSMUSG00000049103,<br>ENSMUSG00000035385, ENSMUSG00000000982                                                                                                                                                                                                                                                                                          | 1        | 0 |                                                                                                                                                                                                |
| GO:0035458 | cellular response to<br>interferon-beta               | 2.34E-20        | 17 | ENSMUSG00000028269, ENSMUSG00000078922,<br>ENSMUSG00000079362, ENSMUSG00000028270,<br>ENSMUSG00000043263, ENSMUSG00000078853,<br>ENSMUSG00000049734, ENSMUSG00000054203,<br>ENSMUSG00000073555, ENSMUSG00000074896,<br>ENSMUSG00000037860, ENSMUSG00000073489,<br>ENSMUSG00000028268, ENSMUSG00000039997,<br>ENSMUSG00000026535, ENSMUSG00000054072,<br>ENSMUSG00000034459 | 1        | 0 |                                                                                                                                                                                                |
| GO:0051249 | regulation of lymphocyte<br>activation                | 1.12E-08        | 35 | ENSMUSG00000036931, ENSMUSG00000073412,<br>ENSMUSG00000049103, ENSMUSG00000016529,                                                                                                                                                                                                                                                                                         | 1        | 4 | ENSMUSG00000063632, ENSMUSG00000024653,<br>ENSMUSG00000026532, ENSMUSG00000017697                                                                                                              |

|            |                                            |            |    |                                                                                                                                                                                                                                                                                                                                                                                                                                                                                                                                                                                                                                                                                                                              |   |   |                                                                                            |
|------------|--------------------------------------------|------------|----|------------------------------------------------------------------------------------------------------------------------------------------------------------------------------------------------------------------------------------------------------------------------------------------------------------------------------------------------------------------------------------------------------------------------------------------------------------------------------------------------------------------------------------------------------------------------------------------------------------------------------------------------------------------------------------------------------------------------------|---|---|--------------------------------------------------------------------------------------------|
|            |                                            |            |    | <p>ENSMUSG00000038179, ENSMUSG00000035385,<br/> ENSMUSG00000075122, ENSMUSG00000030365,<br/> ENSMUSG00000026011, ENSMUSG00000020053,<br/> ENSMUSG00000027398, ENSMUSG00000031551,<br/> ENSMUSG00000026770, ENSMUSG00000025473,<br/> ENSMUSG00000044701, ENSMUSG00000016496,<br/> ENSMUSG00000055170, ENSMUSG00000001444,<br/> ENSMUSG00000027843, ENSMUSG00000055994,<br/> ENSMUSG00000035042, ENSMUSG00000071552,<br/> ENSMUSG00000026573, ENSMUSG00000004296,<br/> ENSMUSG00000000791, ENSMUSG00000022901,<br/> ENSMUSG00000026656, ENSMUSG00000029075,<br/> ENSMUSG00000037440, ENSMUSG00000030124,<br/> ENSMUSG00000016498, ENSMUSG00000022876,<br/> ENSMUSG00000024397, ENSMUSG00000048806,<br/> ENSMUSG00000025746</p> |   |   |                                                                                            |
| GO:0001818 | negative regulation of cytokine production | 9.36E-05   | 17 | <p>ENSMUSG00000055170, ENSMUSG00000027995,<br/> ENSMUSG00000045322, ENSMUSG00000055994,<br/> ENSMUSG00000022548, ENSMUSG00000071552,<br/> ENSMUSG00000030525, ENSMUSG00000026573,<br/> ENSMUSG00000016529, ENSMUSG00000004296,<br/> ENSMUSG00000026656, ENSMUSG00000024401,<br/> ENSMUSG00000048806, ENSMUSG00000078817,<br/> ENSMUSG00000030921, ENSMUSG00000026177,<br/> ENSMUSG00000031551</p>                                                                                                                                                                                                                                                                                                                            | 1 | 4 | <p>ENSMUSG00000024653, ENSMUSG00000032083,<br/> ENSMUSG00000022878, ENSMUSG00000024526</p> |
| GO:0035821 | modification of morphology                 | 0.00514216 | 10 | <p>ENSMUSG00000027995, ENSMUSG00000045322,</p>                                                                                                                                                                                                                                                                                                                                                                                                                                                                                                                                                                                                                                                                               | 1 | 2 | <p>ENSMUSG00000029368, ENSMUSG00000010047</p>                                              |

|            |                                                 |                 |    |                                                                                                                                                                                                                                                                                                                                                                                                                  |   |   |                                        |
|------------|-------------------------------------------------|-----------------|----|------------------------------------------------------------------------------------------------------------------------------------------------------------------------------------------------------------------------------------------------------------------------------------------------------------------------------------------------------------------------------------------------------------------|---|---|----------------------------------------|
|            | or physiology of other organism                 | 7               |    | ENSMUSG00000018930, ENSMUSG00000035042, ENSMUSG00000055994, ENSMUSG00000044583, ENSMUSG00000051498, ENSMUSG00000038357, ENSMUSG00000000982, ENSMUSG00000079227                                                                                                                                                                                                                                                   |   |   |                                        |
| GO:0044126 | regulation of growth of symbiont in host        | 0.00049450<br>7 | 8  | ENSMUSG00000055170, ENSMUSG00000027995, ENSMUSG00000041515, ENSMUSG00000055994, ENSMUSG00000024401, ENSMUSG00000038357, ENSMUSG00000016529, ENSMUSG00000004296                                                                                                                                                                                                                                                   | 1 | 0 |                                        |
| GO:0050671 | positive regulation of lymphocyte proliferation | 0.00725884<br>9 | 15 | ENSMUSG00000055170, ENSMUSG00000029075, ENSMUSG00000075122, ENSMUSG00000035042, ENSMUSG00000016498, ENSMUSG00000024397, ENSMUSG00000026573, ENSMUSG00000020053, ENSMUSG00000025746, ENSMUSG00000027398, ENSMUSG00000049103, ENSMUSG00000004296, ENSMUSG00000000791, ENSMUSG00000026770, ENSMUSG00000022901                                                                                                       | 1 | 2 | ENSMUSG00000026532, ENSMUSG00000017697 |
| GO:0045088 | regulation of innate immune response            | 1.95E-14        | 28 | ENSMUSG00000005696, ENSMUSG000000074151, ENSMUSG00000027995, ENSMUSG00000045322, ENSMUSG00000055994, ENSMUSG00000030149, ENSMUSG00000029377, ENSMUSG00000024349, ENSMUSG00000026573, ENSMUSG00000073406, ENSMUSG00000004296, ENSMUSG00000022901, ENSMUSG00000050241, ENSMUSG00000030413, ENSMUSG00000030124, ENSMUSG00000022906, ENSMUSG00000028874, ENSMUSG00000079298, ENSMUSG00000024339, ENSMUSG00000025804, | 1 | 2 | ENSMUSG00000043496, ENSMUSG00000032076 |

|            |                                                      |                 |    |                                                                                                                                                                                                                                                                                                                                                                                                                                                                                                                                 |   |   |                                                                                                                              |
|------------|------------------------------------------------------|-----------------|----|---------------------------------------------------------------------------------------------------------------------------------------------------------------------------------------------------------------------------------------------------------------------------------------------------------------------------------------------------------------------------------------------------------------------------------------------------------------------------------------------------------------------------------|---|---|------------------------------------------------------------------------------------------------------------------------------|
|            |                                                      |                 |    | ENSMUSG00000044583, ENSMUSG000000051498,<br>ENSMUSG00000030895, ENSMUSG00000027639,<br>ENSMUSG00000037321, ENSMUSG00000030111,<br>ENSMUSG00000042726, ENSMUSG00000025473                                                                                                                                                                                                                                                                                                                                                        |   |   |                                                                                                                              |
| GO:2000404 | regulation of T cell migration                       | 0.00509985<br>9 | 6  | ENSMUSG00000024397, ENSMUSG00000026573,<br>ENSMUSG00000023078, ENSMUSG00000049103,<br>ENSMUSG00000035042, ENSMUSG00000022548                                                                                                                                                                                                                                                                                                                                                                                                    | 1 | 0 |                                                                                                                              |
| GO:0002250 | adaptive immune response                             | 1.34E-09        | 24 | ENSMUSG00000055170, ENSMUSG00000036905,<br>ENSMUSG00000070427, ENSMUSG00000036887,<br>ENSMUSG00000055994, ENSMUSG00000092005,<br>ENSMUSG00000039748, ENSMUSG00000058715,<br>ENSMUSG00000040552, ENSMUSG00000026573,<br>ENSMUSG00000040627, ENSMUSG00000024371,<br>ENSMUSG00000015437, ENSMUSG00000053977,<br>ENSMUSG00000076612, ENSMUSG00000055172,<br>ENSMUSG00000053175, ENSMUSG00000015947,<br>ENSMUSG00000025498, ENSMUSG00000026656,<br>ENSMUSG00000058818, ENSMUSG00000048806,<br>ENSMUSG00000051498, ENSMUSG00000026177 | 1 | 0 |                                                                                                                              |
| GO:0032103 | positive regulation of response to external stimulus | 5.92E-05        | 21 | ENSMUSG00000035042, ENSMUSG00000071005,<br>ENSMUSG00000058715, ENSMUSG00000040552,<br>ENSMUSG00000026573, ENSMUSG00000035373,<br>ENSMUSG00000049103, ENSMUSG00000035385,<br>ENSMUSG00000000982, ENSMUSG00000015947,<br>ENSMUSG00000023913, ENSMUSG00000023078,<br>ENSMUSG00000018930, ENSMUSG00000024401,                                                                                                                                                                                                                       | 1 | 6 | ENSMUSG00000031380, ENSMUSG00000031841,<br>ENSMUSG00000019326, ENSMUSG00000062515,<br>ENSMUSG00000026874, ENSMUSG00000010047 |

|            |                                                                                                                                                                     |                 |    |                                                                                                                                                                                                                                                                                                                                                                                                                                                                                                                                                                                                                                                                                                              |   |   |                                                                                                                              |
|------------|---------------------------------------------------------------------------------------------------------------------------------------------------------------------|-----------------|----|--------------------------------------------------------------------------------------------------------------------------------------------------------------------------------------------------------------------------------------------------------------------------------------------------------------------------------------------------------------------------------------------------------------------------------------------------------------------------------------------------------------------------------------------------------------------------------------------------------------------------------------------------------------------------------------------------------------|---|---|------------------------------------------------------------------------------------------------------------------------------|
|            |                                                                                                                                                                     |                 |    | ENSMUSG00000024397, ENSMUSG00000025746,<br>ENSMUSG00000027398, ENSMUSG00000079227,<br>ENSMUSG00000034855, ENSMUSG00000031551,<br>ENSMUSG00000025473                                                                                                                                                                                                                                                                                                                                                                                                                                                                                                                                                          |   |   |                                                                                                                              |
| GO:0052308 | pathogen-associated<br>molecular pattern dependent<br>modulation by organism of<br>innate immune response in<br>other organism involved in<br>symbiotic interaction | 0.00351362<br>7 | 5  | ENSMUSG00000027995, ENSMUSG00000045322,<br>ENSMUSG00000044583, ENSMUSG00000051498,<br>ENSMUSG00000055994                                                                                                                                                                                                                                                                                                                                                                                                                                                                                                                                                                                                     | 1 | 0 |                                                                                                                              |
| GO:0002697 | regulation of immune<br>effector process                                                                                                                            | 2.95E-19        | 43 | ENSMUSG00000060802, ENSMUSG00000027995,<br>ENSMUSG00000049103, ENSMUSG00000061232,<br>ENSMUSG00000016529, ENSMUSG00000073406,<br>ENSMUSG00000035385, ENSMUSG00000073411,<br>ENSMUSG00000028874, ENSMUSG00000040296,<br>ENSMUSG00000034652, ENSMUSG00000030895,<br>ENSMUSG00000037321, ENSMUSG00000034459,<br>ENSMUSG00000026770, ENSMUSG00000067212,<br>ENSMUSG00000044701, ENSMUSG00000005696,<br>ENSMUSG00000055170, ENSMUSG00000001444,<br>ENSMUSG00000055994, ENSMUSG00000035042,<br>ENSMUSG00000024353, ENSMUSG00000058715,<br>ENSMUSG00000030149, ENSMUSG00000024349,<br>ENSMUSG00000026573, ENSMUSG00000004296,<br>ENSMUSG00000000791, ENSMUSG00000015947,<br>ENSMUSG00000026656, ENSMUSG00000050241, | 1 | 6 | ENSMUSG00000090877, ENSMUSG00000042812,<br>ENSMUSG00000024990, ENSMUSG00000043496,<br>ENSMUSG00000032083, ENSMUSG00000032076 |

|            |                                                    |                 |    |                                                                                                                                                                                                                                                                                                                                                                                                                                                                                                                                                                                                                                                                                                              |   |    |                                                                                                                                                                                                                                                                                                                                                                                                                                                                                                                                                                                                                                                                                                              |
|------------|----------------------------------------------------|-----------------|----|--------------------------------------------------------------------------------------------------------------------------------------------------------------------------------------------------------------------------------------------------------------------------------------------------------------------------------------------------------------------------------------------------------------------------------------------------------------------------------------------------------------------------------------------------------------------------------------------------------------------------------------------------------------------------------------------------------------|---|----|--------------------------------------------------------------------------------------------------------------------------------------------------------------------------------------------------------------------------------------------------------------------------------------------------------------------------------------------------------------------------------------------------------------------------------------------------------------------------------------------------------------------------------------------------------------------------------------------------------------------------------------------------------------------------------------------------------------|
|            |                                                    |                 |    | ENSMUSG00000029075, ENSMUSG00000029371,<br>ENSMUSG00000030124, ENSMUSG00000079298,<br>ENSMUSG00000079620, ENSMUSG00000036986,<br>ENSMUSG00000024401, ENSMUSG00000024339,<br>ENSMUSG00000048806, ENSMUSG00000025746,<br>ENSMUSG00000030111                                                                                                                                                                                                                                                                                                                                                                                                                                                                    |   |    |                                                                                                                                                                                                                                                                                                                                                                                                                                                                                                                                                                                                                                                                                                              |
| GO:0050691 | regulation of defense<br>response to virus by host | 0.00352050<br>2 | 7  | ENSMUSG00000024349, ENSMUSG00000040296,<br>ENSMUSG00000004296, ENSMUSG00000035042,<br>ENSMUSG00000034459, ENSMUSG00000000791,<br>ENSMUSG00000036986                                                                                                                                                                                                                                                                                                                                                                                                                                                                                                                                                          | 1 | 0  |                                                                                                                                                                                                                                                                                                                                                                                                                                                                                                                                                                                                                                                                                                              |
| GO:0070887 | cellular response to chemical<br>stimulus          | 4.63E-10        | 85 | ENSMUSG00000048534, ENSMUSG00000027699,<br>ENSMUSG00000066861, ENSMUSG00000049103,<br>ENSMUSG00000018899, ENSMUSG00000078853,<br>ENSMUSG00000026073, ENSMUSG00000050232,<br>ENSMUSG00000028072, ENSMUSG00000054203,<br>ENSMUSG00000018930, ENSMUSG00000030786,<br>ENSMUSG00000040253, ENSMUSG00000025804,<br>ENSMUSG00000040264, ENSMUSG00000045932,<br>ENSMUSG00000000182, ENSMUSG00000054072,<br>ENSMUSG00000026770, ENSMUSG00000091875,<br>ENSMUSG00000025473, ENSMUSG00000038037,<br>ENSMUSG00000026068, ENSMUSG00000025492,<br>ENSMUSG00000079362, ENSMUSG00000028270,<br>ENSMUSG00000035373, ENSMUSG00000000982,<br>ENSMUSG00000029304, ENSMUSG00000030793,<br>ENSMUSG00000028268, ENSMUSG00000028068, | 1 | 47 | ENSMUSG00000031134, ENSMUSG00000009471,<br>ENSMUSG00000025810, ENSMUSG00000027796,<br>ENSMUSG00000025889, ENSMUSG00000062515,<br>ENSMUSG00000055980, ENSMUSG00000046532,<br>ENSMUSG00000032511, ENSMUSG00000046714,<br>ENSMUSG00000031841, ENSMUSG00000057182,<br>ENSMUSG00000024028, ENSMUSG00000078658,<br>ENSMUSG00000032310, ENSMUSG00000018566,<br>ENSMUSG00000021055, ENSMUSG00000020889,<br>ENSMUSG00000005547, ENSMUSG00000005705,<br>ENSMUSG00000022996, ENSMUSG00000031760,<br>ENSMUSG00000029195, ENSMUSG00000010051,<br>ENSMUSG00000019278, ENSMUSG00000074183,<br>ENSMUSG00000026459, ENSMUSG00000057933,<br>ENSMUSG00000029361, ENSMUSG00000032348,<br>ENSMUSG00000022878, ENSMUSG00000042812, |

|  |  |  |                                                                                                                                                                                                                                                                                                                                                                                                                                                                                                                                                                                                                                                                                                                                                                                                                                                                                                                                                                                                                                                                                                                                                           |  |  |                                                                                                                                                                                                                                                                                                                                |
|--|--|--|-----------------------------------------------------------------------------------------------------------------------------------------------------------------------------------------------------------------------------------------------------------------------------------------------------------------------------------------------------------------------------------------------------------------------------------------------------------------------------------------------------------------------------------------------------------------------------------------------------------------------------------------------------------------------------------------------------------------------------------------------------------------------------------------------------------------------------------------------------------------------------------------------------------------------------------------------------------------------------------------------------------------------------------------------------------------------------------------------------------------------------------------------------------|--|--|--------------------------------------------------------------------------------------------------------------------------------------------------------------------------------------------------------------------------------------------------------------------------------------------------------------------------------|
|  |  |  | ENSMUSG00000038418, ENSMUSG00000048806,<br>ENSMUSG00000058818, ENSMUSG00000029380,<br>ENSMUSG00000053219, ENSMUSG00000024079,<br>ENSMUSG00000035352, ENSMUSG00000078922,<br>ENSMUSG00000003665, ENSMUSG00000026822,<br>ENSMUSG00000058427, ENSMUSG00000029379,<br>ENSMUSG00000071005, ENSMUSG00000031762,<br>ENSMUSG00000029377, ENSMUSG00000029811,<br>ENSMUSG00000029298, ENSMUSG00000043263,<br>ENSMUSG00000074115, ENSMUSG00000035385,<br>ENSMUSG00000017146, ENSMUSG00000037860,<br>ENSMUSG00000073489, ENSMUSG00000039997,<br>ENSMUSG00000026535, ENSMUSG00000027398,<br>ENSMUSG00000034459, ENSMUSG00000041324,<br>ENSMUSG00000031765, ENSMUSG00000055170,<br>ENSMUSG00000068227, ENSMUSG00000079363,<br>ENSMUSG00000028269, ENSMUSG00000026104,<br>ENSMUSG00000035042, ENSMUSG00000071714,<br>ENSMUSG00000058715, ENSMUSG00000024349,<br>ENSMUSG00000026573, ENSMUSG0000004296,<br>ENSMUSG00000000791, ENSMUSG00000049734,<br>ENSMUSG00000023078, ENSMUSG00000073555,<br>ENSMUSG00000074896, ENSMUSG00000036986,<br>ENSMUSG00000024401, ENSMUSG00000034438,<br>ENSMUSG00000054588, ENSMUSG00000026580,<br>ENSMUSG00000025746, ENSMUSG00000037868, |  |  | ENSMUSG00000041658, ENSMUSG00000059201,<br>ENSMUSG00000052974, ENSMUSG0000005373,<br>ENSMUSG00000024039, ENSMUSG00000035486,<br>ENSMUSG00000032315, ENSMUSG00000001494,<br>ENSMUSG00000027820, ENSMUSG00000023013,<br>ENSMUSG00000031144, ENSMUSG00000030747,<br>ENSMUSG00000042903, ENSMUSG00000006235,<br>ENSMUSG00000010047 |
|--|--|--|-----------------------------------------------------------------------------------------------------------------------------------------------------------------------------------------------------------------------------------------------------------------------------------------------------------------------------------------------------------------------------------------------------------------------------------------------------------------------------------------------------------------------------------------------------------------------------------------------------------------------------------------------------------------------------------------------------------------------------------------------------------------------------------------------------------------------------------------------------------------------------------------------------------------------------------------------------------------------------------------------------------------------------------------------------------------------------------------------------------------------------------------------------------|--|--|--------------------------------------------------------------------------------------------------------------------------------------------------------------------------------------------------------------------------------------------------------------------------------------------------------------------------------|

|            |                                                        |          |     |                                                                                                                                                                                                                                                                                                                                                  |   |     |                                                                                 |
|------------|--------------------------------------------------------|----------|-----|--------------------------------------------------------------------------------------------------------------------------------------------------------------------------------------------------------------------------------------------------------------------------------------------------------------------------------------------------|---|-----|---------------------------------------------------------------------------------|
|            |                                                        |          |     | ENSMUSG0000007173                                                                                                                                                                                                                                                                                                                                |   |     |                                                                                 |
| GO:0002274 | myeloid leukocyte activation                           | 4.55E-07 | 17  | ENSMUSG00000040528, ENSMUSG00000027995, ENSMUSG00000045322, ENSMUSG00000035042, ENSMUSG00000055994, ENSMUSG00000040751, ENSMUSG00000035673, ENSMUSG0000002699, ENSMUSG00000035186, ENSMUSG00000058715, ENSMUSG0000000982, ENSMUSG00000044827, ENSMUSG00000058818, ENSMUSG00000044583, ENSMUSG00000034652, ENSMUSG00000051498, ENSMUSG00000026177 | 1 | 2   | ENSMUSG00000025889, ENSMUSG00000010047                                          |
| GO:0048002 | antigen processing and presentation of peptide antigen | 7.07E-08 | 14  | ENSMUSG00000026656, ENSMUSG00000073411, ENSMUSG00000060802, ENSMUSG00000058715, ENSMUSG00000073409, ENSMUSG00000024339, ENSMUSG00000035929, ENSMUSG00000061232, ENSMUSG00000037321, ENSMUSG00000026177, ENSMUSG00000036469, ENSMUSG00000015947, ENSMUSG00000060550, ENSMUSG00000067212                                                           | 1 | 0   |                                                                                 |
| GO:0002688 | regulation of leukocyte chemotaxis                     | 6.86E-06 | 14  | ENSMUSG00000023913, ENSMUSG00000023078, ENSMUSG00000018930, ENSMUSG00000035042, ENSMUSG00000055994, ENSMUSG00000071005, ENSMUSG00000024397, ENSMUSG00000026573, ENSMUSG00000040552, ENSMUSG00000035373, ENSMUSG00000049103, ENSMUSG00000035385, ENSMUSG00000000982, ENSMUSG00000034855                                                           | 1 | 2   | ENSMUSG00000031380, ENSMUSG00000026874                                          |
| GO:0048522 | positive regulation of cellular process                | 1.83E-07 | 171 | ENSMUSG00000017716, ENSMUSG00000033538, ENSMUSG00000036931, ENSMUSG00000027995,                                                                                                                                                                                                                                                                  | 1 | 113 | ENSMUSG00000009471, ENSMUSG00000039956, ENSMUSG00000021506, ENSMUSG00000020123, |



|  |  |  |                                                                                                                                                                                                                                                                                                                                                                                                                                                                                                                                                                                                                                                                                                                                                                                                                                                                                                                                                                                                                                                                                                                                                            |  |  |                                                                                                                                                                                                                                                                                                                                                                                                                                                                                                                                                                                                                                                                                                                                                                                                                                                                                                                                                                                                                                                                                                                                                            |
|--|--|--|------------------------------------------------------------------------------------------------------------------------------------------------------------------------------------------------------------------------------------------------------------------------------------------------------------------------------------------------------------------------------------------------------------------------------------------------------------------------------------------------------------------------------------------------------------------------------------------------------------------------------------------------------------------------------------------------------------------------------------------------------------------------------------------------------------------------------------------------------------------------------------------------------------------------------------------------------------------------------------------------------------------------------------------------------------------------------------------------------------------------------------------------------------|--|--|------------------------------------------------------------------------------------------------------------------------------------------------------------------------------------------------------------------------------------------------------------------------------------------------------------------------------------------------------------------------------------------------------------------------------------------------------------------------------------------------------------------------------------------------------------------------------------------------------------------------------------------------------------------------------------------------------------------------------------------------------------------------------------------------------------------------------------------------------------------------------------------------------------------------------------------------------------------------------------------------------------------------------------------------------------------------------------------------------------------------------------------------------------|
|  |  |  | ENSMUSG00000027699, ENSMUSG00000049103,<br>ENSMUSG00000053977, ENSMUSG00000075404,<br>ENSMUSG00000019942, ENSMUSG00000022831,<br>ENSMUSG00000020848, ENSMUSG00000000817,<br>ENSMUSG00000033644, ENSMUSG00000022504,<br>ENSMUSG00000001123, ENSMUSG00000028071,<br>ENSMUSG00000040296, ENSMUSG00000000247,<br>ENSMUSG00000020053, ENSMUSG00000027715,<br>ENSMUSG00000031551, ENSMUSG00000025473,<br>ENSMUSG00000030142, ENSMUSG00000045322,<br>ENSMUSG00000001444, ENSMUSG00000002992,<br>ENSMUSG00000055994, ENSMUSG00000001228,<br>ENSMUSG00000030149, ENSMUSG00000041431,<br>ENSMUSG00000000982, ENSMUSG00000029304,<br>ENSMUSG00000038067, ENSMUSG00000053175,<br>ENSMUSG00000002307, ENSMUSG00000026656,<br>ENSMUSG00000023913, ENSMUSG00000020897,<br>ENSMUSG00000029075, ENSMUSG00000017499,<br>ENSMUSG00000026582, ENSMUSG00000028068,<br>ENSMUSG00000022221, ENSMUSG00000038418,<br>ENSMUSG00000024079, ENSMUSG00000074151,<br>ENSMUSG00000040613, ENSMUSG00000026822,<br>ENSMUSG00000071005, ENSMUSG00000038209,<br>ENSMUSG00000047517, ENSMUSG00000029377,<br>ENSMUSG00000051439, ENSMUSG00000032691,<br>ENSMUSG00000045328, ENSMUSG00000062007, |  |  | ENSMUSG00000017204, ENSMUSG00000032547,<br>ENSMUSG00000031495, ENSMUSG00000025889,<br>ENSMUSG00000062515, ENSMUSG00000046532,<br>ENSMUSG00000054422, ENSMUSG00000023328,<br>ENSMUSG00000020524, ENSMUSG00000037188,<br>ENSMUSG00000044820, ENSMUSG00000090639,<br>ENSMUSG00000061393, ENSMUSG00000071317,<br>ENSMUSG00000026874, ENSMUSG00000039004,<br>ENSMUSG00000033208, ENSMUSG00000034910,<br>ENSMUSG00000031253, ENSMUSG00000031760,<br>ENSMUSG00000029195, ENSMUSG00000019102,<br>ENSMUSG00000010051, ENSMUSG00000032839,<br>ENSMUSG00000044405, ENSMUSG00000037071,<br>ENSMUSG00000017697, ENSMUSG00000036867,<br>ENSMUSG00000026459, ENSMUSG00000049641,<br>ENSMUSG00000029193, ENSMUSG00000037010,<br>ENSMUSG00000040289, ENSMUSG00000051234,<br>ENSMUSG00000032076, ENSMUSG00000008035,<br>ENSMUSG00000022878, ENSMUSG00000024027,<br>ENSMUSG00000025860, ENSMUSG00000013076,<br>ENSMUSG00000042812, ENSMUSG00000034584,<br>ENSMUSG00000059201, ENSMUSG00000022868,<br>ENSMUSG00000027470, ENSMUSG00000030278,<br>ENSMUSG00000035486, ENSMUSG00000041624,<br>ENSMUSG00000001494, ENSMUSG00000032315,<br>ENSMUSG00000079434, ENSMUSG00000059327, |
|--|--|--|------------------------------------------------------------------------------------------------------------------------------------------------------------------------------------------------------------------------------------------------------------------------------------------------------------------------------------------------------------------------------------------------------------------------------------------------------------------------------------------------------------------------------------------------------------------------------------------------------------------------------------------------------------------------------------------------------------------------------------------------------------------------------------------------------------------------------------------------------------------------------------------------------------------------------------------------------------------------------------------------------------------------------------------------------------------------------------------------------------------------------------------------------------|--|--|------------------------------------------------------------------------------------------------------------------------------------------------------------------------------------------------------------------------------------------------------------------------------------------------------------------------------------------------------------------------------------------------------------------------------------------------------------------------------------------------------------------------------------------------------------------------------------------------------------------------------------------------------------------------------------------------------------------------------------------------------------------------------------------------------------------------------------------------------------------------------------------------------------------------------------------------------------------------------------------------------------------------------------------------------------------------------------------------------------------------------------------------------------|

|  |  |                                                                                                                                                                                                                                                                                                                                                                                                                                                                                                                                                                                                                                                                                                                                                                                                                                                                                                                                                                                                                                                                                                                                                            |  |                                                                                                                                                                                                                                                                                                                                                                                                                                                                                                                                                                                                                                                                                                                                                                                                                                                                                                                                                                                                                                                                                                                                                           |
|--|--|------------------------------------------------------------------------------------------------------------------------------------------------------------------------------------------------------------------------------------------------------------------------------------------------------------------------------------------------------------------------------------------------------------------------------------------------------------------------------------------------------------------------------------------------------------------------------------------------------------------------------------------------------------------------------------------------------------------------------------------------------------------------------------------------------------------------------------------------------------------------------------------------------------------------------------------------------------------------------------------------------------------------------------------------------------------------------------------------------------------------------------------------------------|--|-----------------------------------------------------------------------------------------------------------------------------------------------------------------------------------------------------------------------------------------------------------------------------------------------------------------------------------------------------------------------------------------------------------------------------------------------------------------------------------------------------------------------------------------------------------------------------------------------------------------------------------------------------------------------------------------------------------------------------------------------------------------------------------------------------------------------------------------------------------------------------------------------------------------------------------------------------------------------------------------------------------------------------------------------------------------------------------------------------------------------------------------------------------|
|  |  | ENSMUSG00000037725, ENSMUSG00000027398,<br>ENSMUSG00000028362, ENSMUSG00000055170,<br>ENSMUSG00000022838, ENSMUSG00000035042,<br>ENSMUSG00000035186, ENSMUSG00000058715,<br>ENSMUSG00000035555, ENSMUSG00000090125,<br>ENSMUSG00000004296, ENSMUSG00000023015,<br>ENSMUSG00000000791, ENSMUSG00000015947,<br>ENSMUSG00000023078, ENSMUSG00000041515,<br>ENSMUSG00000037440, ENSMUSG00000034394,<br>ENSMUSG00000039519, ENSMUSG00000036986,<br>ENSMUSG00000024401, ENSMUSG00000074622,<br>ENSMUSG00000026580, ENSMUSG00000037868,<br>ENSMUSG00000025746, ENSMUSG00000040658,<br>ENSMUSG00000053113, ENSMUSG00000004328,<br>ENSMUSG00000025165, ENSMUSG00000024112,<br>ENSMUSG00000026628, ENSMUSG00000058755,<br>ENSMUSG00000006930, ENSMUSG00000018899,<br>ENSMUSG00000016529, ENSMUSG00000015437,<br>ENSMUSG00000045232, ENSMUSG00000017724,<br>ENSMUSG00000006398, ENSMUSG00000068744,<br>ENSMUSG00000028072, ENSMUSG00000018930,<br>ENSMUSG00000021714, ENSMUSG00000070034,<br>ENSMUSG00000026222, ENSMUSG00000025804,<br>ENSMUSG00000051498, ENSMUSG00000030895,<br>ENSMUSG00000046718, ENSMUSG00000044811,<br>ENSMUSG00000000182, ENSMUSG00000034855, |  | ENSMUSG00000034563, ENSMUSG00000032491,<br>ENSMUSG00000024990, ENSMUSG00000032083,<br>ENSMUSG00000059481, ENSMUSG00000042903,<br>ENSMUSG00000054196, ENSMUSG00000031980,<br>ENSMUSG00000040412, ENSMUSG00000031380,<br>ENSMUSG00000031134, ENSMUSG00000027796,<br>ENSMUSG00000025810, ENSMUSG00000024500,<br>ENSMUSG00000055980, ENSMUSG00000040147,<br>ENSMUSG00000032380, ENSMUSG00000046714,<br>ENSMUSG00000029236, ENSMUSG00000031841,<br>ENSMUSG00000032010, ENSMUSG00000021319,<br>ENSMUSG00000033577, ENSMUSG00000032554,<br>ENSMUSG00000031320, ENSMUSG00000024028,<br>ENSMUSG00000024972, ENSMUSG00000041688,<br>ENSMUSG00000021055, ENSMUSG00000020427,<br>ENSMUSG00000022996, ENSMUSG00000031489,<br>ENSMUSG00000032216, ENSMUSG00000020623,<br>ENSMUSG00000063632, ENSMUSG00000032064,<br>ENSMUSG00000001403, ENSMUSG00000029361,<br>ENSMUSG00000073465, ENSMUSG00000038119,<br>ENSMUSG00000026532, ENSMUSG00000055653,<br>ENSMUSG00000050071, ENSMUSG00000019326,<br>ENSMUSG00000032570, ENSMUSG0000005373,<br>ENSMUSG00000032911, ENSMUSG00000059824,<br>ENSMUSG00000025386, ENSMUSG00000007815,<br>ENSMUSG00000005355, ENSMUSG00000021573, |
|--|--|------------------------------------------------------------------------------------------------------------------------------------------------------------------------------------------------------------------------------------------------------------------------------------------------------------------------------------------------------------------------------------------------------------------------------------------------------------------------------------------------------------------------------------------------------------------------------------------------------------------------------------------------------------------------------------------------------------------------------------------------------------------------------------------------------------------------------------------------------------------------------------------------------------------------------------------------------------------------------------------------------------------------------------------------------------------------------------------------------------------------------------------------------------|--|-----------------------------------------------------------------------------------------------------------------------------------------------------------------------------------------------------------------------------------------------------------------------------------------------------------------------------------------------------------------------------------------------------------------------------------------------------------------------------------------------------------------------------------------------------------------------------------------------------------------------------------------------------------------------------------------------------------------------------------------------------------------------------------------------------------------------------------------------------------------------------------------------------------------------------------------------------------------------------------------------------------------------------------------------------------------------------------------------------------------------------------------------------------|

|  |  |  |                                                                                                                                                                                                                                                                                                                                                                                                                                                                                                                                                                                                                                                                                                                                                                                                                                                                                                                                                                                                                                                                                                                                                          |  |                                                                                                          |
|--|--|--|----------------------------------------------------------------------------------------------------------------------------------------------------------------------------------------------------------------------------------------------------------------------------------------------------------------------------------------------------------------------------------------------------------------------------------------------------------------------------------------------------------------------------------------------------------------------------------------------------------------------------------------------------------------------------------------------------------------------------------------------------------------------------------------------------------------------------------------------------------------------------------------------------------------------------------------------------------------------------------------------------------------------------------------------------------------------------------------------------------------------------------------------------------|--|----------------------------------------------------------------------------------------------------------|
|  |  |  | ENSMUSG00000079019, ENSMUSG00000026770,<br>ENSMUSG00000033470, ENSMUSG00000044701,<br>ENSMUSG00000005696, ENSMUSG00000018920,<br>ENSMUSG00000070691, ENSMUSG00000030525,<br>ENSMUSG00000040552, ENSMUSG00000040627,<br>ENSMUSG00000035373, ENSMUSG00000027306,<br>ENSMUSG00000038357, ENSMUSG00000025498,<br>ENSMUSG0000002068, ENSMUSG00000030793,<br>ENSMUSG0000003283, ENSMUSG00000078236,<br>ENSMUSG00000030867, ENSMUSG00000016498,<br>ENSMUSG00000022622, ENSMUSG00000044138,<br>ENSMUSG00000024397, ENSMUSG00000048806,<br>ENSMUSG00000044583, ENSMUSG00000078817,<br>ENSMUSG00000033952, ENSMUSG00000021451,<br>ENSMUSG00000027832, ENSMUSG00000025044,<br>ENSMUSG00000031444, ENSMUSG00000074115,<br>ENSMUSG00000029378, ENSMUSG00000035385,<br>ENSMUSG00000023132, ENSMUSG00000017146,<br>ENSMUSG00000075122, ENSMUSG00000028874,<br>ENSMUSG00000029915, ENSMUSG00000073489,<br>ENSMUSG00000030365, ENSMUSG00000026011,<br>ENSMUSG00000079227, ENSMUSG00000049608,<br>ENSMUSG00000035683, ENSMUSG00000041324,<br>ENSMUSG00000024014, ENSMUSG00000057135,<br>ENSMUSG00000028602, ENSMUSG00000026104,<br>ENSMUSG00000024349, ENSMUSG00000026573, |  | ENSMUSG00000031097, ENSMUSG00000062778,<br>ENSMUSG00000058914, ENSMUSG00000020052,<br>ENSMUSG00000010047 |
|--|--|--|----------------------------------------------------------------------------------------------------------------------------------------------------------------------------------------------------------------------------------------------------------------------------------------------------------------------------------------------------------------------------------------------------------------------------------------------------------------------------------------------------------------------------------------------------------------------------------------------------------------------------------------------------------------------------------------------------------------------------------------------------------------------------------------------------------------------------------------------------------------------------------------------------------------------------------------------------------------------------------------------------------------------------------------------------------------------------------------------------------------------------------------------------------|--|----------------------------------------------------------------------------------------------------------|

|            |                                                 |            |    |                                                                                                                                                                                                                                                                                                                                                                                                                                           |   |    |                                         |
|------------|-------------------------------------------------|------------|----|-------------------------------------------------------------------------------------------------------------------------------------------------------------------------------------------------------------------------------------------------------------------------------------------------------------------------------------------------------------------------------------------------------------------------------------------|---|----|-----------------------------------------|
|            |                                                 |            |    | ENSMUSG00000020310, ENSMUSG000000024798,<br>ENSMUSG00000022901, ENSMUSG00000021886,<br>ENSMUSG00000045471, ENSMUSG00000044827,<br>ENSMUSG00000034116, ENSMUSG00000020649,<br>ENSMUSG00000041347, ENSMUSG00000026177,<br>ENSMUSG00000054136                                                                                                                                                                                                |   |    |                                         |
| GO:0051251 | positive regulation of<br>lymphocyte activation | 0.00446454 | 20 | ENSMUSG00000055170, ENSMUSG00000001444,<br>ENSMUSG00000035042, ENSMUSG00000055994,<br>ENSMUSG00000026573, ENSMUSG00000049103,<br>ENSMUSG00000035385, ENSMUSG00000004296,<br>ENSMUSG00000000791, ENSMUSG00000022901,<br>ENSMUSG00000029075, ENSMUSG00000037440,<br>ENSMUSG00000075122, ENSMUSG00000016498,<br>ENSMUSG00000024397, ENSMUSG00000025746,<br>ENSMUSG00000020053, ENSMUSG00000027398,<br>ENSMUSG00000026770, ENSMUSG00000025473 | 1 | 2  | ENSMUSG00000026532, ENSMUSG00000017697  |
| GO:0050830 | defense response to<br>Gram-positive bacterium  | 2.25E-10   | 17 | ENSMUSG00000027995, ENSMUSG00000028269,<br>ENSMUSG00000079362, ENSMUSG00000055994,<br>ENSMUSG00000030149, ENSMUSG00000028270,<br>ENSMUSG00000029298, ENSMUSG00000079563,<br>ENSMUSG00000038357, ENSMUSG00000030413,<br>ENSMUSG00000003283, ENSMUSG00000028874,<br>ENSMUSG00000028268, ENSMUSG00000024401,<br>ENSMUSG00000040253, ENSMUSG00000054588,<br>ENSMUSG00000028362                                                                | 1 | 0  |                                         |
| GO:0051050 | positive regulation of                          | 3.44E-05   | 45 | ENSMUSG00000027832, ENSMUSG00000024112,                                                                                                                                                                                                                                                                                                                                                                                                   | 1 | 32 | ENSMUSG00000020123, ENSMUSG00000030302, |

|            |                                                                                 |            |   |                                                                                                                                                                                                                                                                                                                                                                                                                                                                                                                                                                                                                                                                                                                                                                                                                                                                                            |   |   |                                                                                                                                                                                                                                                                                                                                                                                                                                                                                                                                                                                                                        |
|------------|---------------------------------------------------------------------------------|------------|---|--------------------------------------------------------------------------------------------------------------------------------------------------------------------------------------------------------------------------------------------------------------------------------------------------------------------------------------------------------------------------------------------------------------------------------------------------------------------------------------------------------------------------------------------------------------------------------------------------------------------------------------------------------------------------------------------------------------------------------------------------------------------------------------------------------------------------------------------------------------------------------------------|---|---|------------------------------------------------------------------------------------------------------------------------------------------------------------------------------------------------------------------------------------------------------------------------------------------------------------------------------------------------------------------------------------------------------------------------------------------------------------------------------------------------------------------------------------------------------------------------------------------------------------------------|
|            | transport                                                                       |            |   | ENSMUSG00000027995, ENSMUSG00000071005, ENSMUSG00000038209, ENSMUSG00000027699, ENSMUSG00000051439, ENSMUSG00000074115, ENSMUSG00000016529, ENSMUSG00000032691, ENSMUSG00000019942, ENSMUSG00000020848, ENSMUSG00000018930, ENSMUSG00000029915, ENSMUSG00000028874, ENSMUSG00000040296, ENSMUSG00000025804, ENSMUSG00000020053, ENSMUSG00000027398, ENSMUSG00000044811, ENSMUSG00000079227, ENSMUSG00000030142, ENSMUSG00000055170, ENSMUSG00000045322, ENSMUSG00000055994, ENSMUSG00000035042, ENSMUSG00000058715, ENSMUSG00000024349, ENSMUSG00000026573, ENSMUSG00000000982, ENSMUSG00000015947, ENSMUSG00000026656, ENSMUSG00000030793, ENSMUSG00000045471, ENSMUSG00000029075, ENSMUSG00000026582, ENSMUSG00000034394, ENSMUSG00000024401, ENSMUSG00000044138, ENSMUSG00000025746, ENSMUSG00000044583, ENSMUSG00000041347, ENSMUSG00000029380, ENSMUSG00000078817, ENSMUSG00000026177 |   |   | ENSMUSG00000031495, ENSMUSG00000025889, ENSMUSG00000055980, ENSMUSG00000029236, ENSMUSG00000002588, ENSMUSG00000021319, ENSMUSG00000026874, ENSMUSG00000032216, ENSMUSG00000032839, ENSMUSG00000048142, ENSMUSG00000063632, ENSMUSG00000029193, ENSMUSG00000037010, ENSMUSG00000032076, ENSMUSG00000024027, ENSMUSG00000022878, ENSMUSG00000059201, ENSMUSG00000055653, ENSMUSG00000034584, ENSMUSG00000019326, ENSMUSG00000022868, ENSMUSG00000059327, ENSMUSG00000050164, ENSMUSG00000023013, ENSMUSG00000024990, ENSMUSG00000062778, ENSMUSG00000049281, ENSMUSG00000031997, ENSMUSG00000031980, ENSMUSG00000010047 |
| GO:0052564 | response to immune response of other organism involved in symbiotic interaction | 0.00907611 | 5 | ENSMUSG00000027995, ENSMUSG00000045322, ENSMUSG00000044583, ENSMUSG00000051498, ENSMUSG00000055994                                                                                                                                                                                                                                                                                                                                                                                                                                                                                                                                                                                                                                                                                                                                                                                         | 1 | 0 |                                                                                                                                                                                                                                                                                                                                                                                                                                                                                                                                                                                                                        |

|            |                                                |                 |    |                                                                                                                                                                                                                                                                                                                                                                                                                                                                                                                                                                                                                                                                                                                                                                    |   |   |                                                                                                                                            |
|------------|------------------------------------------------|-----------------|----|--------------------------------------------------------------------------------------------------------------------------------------------------------------------------------------------------------------------------------------------------------------------------------------------------------------------------------------------------------------------------------------------------------------------------------------------------------------------------------------------------------------------------------------------------------------------------------------------------------------------------------------------------------------------------------------------------------------------------------------------------------------------|---|---|--------------------------------------------------------------------------------------------------------------------------------------------|
| GO:0002683 | negative regulation of immune system process   | 1.21E-14        | 37 | ENSMUSG00000036931, ENSMUSG00000040528, ENSMUSG00000073412, ENSMUSG00000049103, ENSMUSG00000024696, ENSMUSG00000016529, ENSMUSG00000073406, ENSMUSG00000035385, ENSMUSG00000026011, ENSMUSG00000025804, ENSMUSG00000034652, ENSMUSG00000037321, ENSMUSG00000031551, ENSMUSG00000034459, ENSMUSG00000030921, ENSMUSG00000026770, ENSMUSG00000016496, ENSMUSG00000045322, ENSMUSG00000027843, ENSMUSG00000022548, ENSMUSG00000055994, ENSMUSG00000071552, ENSMUSG00000026573, ENSMUSG00000004296, ENSMUSG00000022901, ENSMUSG00000026656, ENSMUSG00000050241, ENSMUSG00000030124, ENSMUSG00000079298, ENSMUSG00000079620, ENSMUSG00000016498, ENSMUSG00000022876, ENSMUSG00000024339, ENSMUSG00000048806, ENSMUSG00000042345, ENSMUSG00000042726, ENSMUSG00000030111 | 1 | 7 | ENSMUSG00000020889, ENSMUSG00000063632, ENSMUSG00000042812, ENSMUSG00000024653, ENSMUSG00000024028, ENSMUSG00000026874, ENSMUSG00000017697 |
| GO:0045343 | regulation of MHC class I biosynthetic process | 0.00103639<br>4 | 5  | ENSMUSG00000022504, ENSMUSG00000074151, ENSMUSG00000078817, ENSMUSG00000036986, ENSMUSG00000075404                                                                                                                                                                                                                                                                                                                                                                                                                                                                                                                                                                                                                                                                 | 1 | 0 |                                                                                                                                            |
| GO:0042832 | defense response to protozoan                  | 1.23E-16        | 15 | ENSMUSG00000055170, ENSMUSG00000028269, ENSMUSG00000069874, ENSMUSG00000041515, ENSMUSG00000079362, ENSMUSG00000028268, ENSMUSG00000040253, ENSMUSG00000054588,                                                                                                                                                                                                                                                                                                                                                                                                                                                                                                                                                                                                    | 1 | 0 |                                                                                                                                            |

|            |                               |          |    |                                                                                                                                                                                                                                                                                                                                                                                                                                                                                                                                                                                                                                                                                                                                                                                                                                                                                        |             |   |                                                                                                                                                                         |
|------------|-------------------------------|----------|----|----------------------------------------------------------------------------------------------------------------------------------------------------------------------------------------------------------------------------------------------------------------------------------------------------------------------------------------------------------------------------------------------------------------------------------------------------------------------------------------------------------------------------------------------------------------------------------------------------------------------------------------------------------------------------------------------------------------------------------------------------------------------------------------------------------------------------------------------------------------------------------------|-------------|---|-------------------------------------------------------------------------------------------------------------------------------------------------------------------------|
|            |                               |          |    | ENSMUSG00000028270, ENSMUSG00000025746,<br>ENSMUSG00000029298, ENSMUSG00000054072,<br>ENSMUSG00000004296, ENSMUSG00000053175,<br>ENSMUSG00000026177                                                                                                                                                                                                                                                                                                                                                                                                                                                                                                                                                                                                                                                                                                                                    |             |   |                                                                                                                                                                         |
| GO:0050865 | regulation of cell activation | 8.78E-09 | 40 | ENSMUSG00000036931, ENSMUSG00000040528,<br>ENSMUSG00000073412, ENSMUSG00000049103,<br>ENSMUSG00000016529, ENSMUSG00000038179,<br>ENSMUSG00000035385, ENSMUSG00000075122,<br>ENSMUSG00000028874, ENSMUSG00000030365,<br>ENSMUSG00000026011, ENSMUSG00000020053,<br>ENSMUSG00000034652, ENSMUSG00000027398,<br>ENSMUSG00000031551, ENSMUSG00000026770,<br>ENSMUSG00000025473, ENSMUSG00000016496,<br>ENSMUSG00000044701, ENSMUSG00000055170,<br>ENSMUSG0000001444, ENSMUSG00000027843,<br>ENSMUSG00000055994, ENSMUSG00000035042,<br>ENSMUSG00000058715, ENSMUSG00000071552,<br>ENSMUSG00000026573, ENSMUSG00000004296,<br>ENSMUSG00000000791, ENSMUSG00000022901,<br>ENSMUSG00000026656, ENSMUSG00000029075,<br>ENSMUSG00000037440, ENSMUSG00000030124,<br>ENSMUSG00000016498, ENSMUSG00000022876,<br>ENSMUSG00000024397, ENSMUSG00000026580,<br>ENSMUSG00000048806, ENSMUSG00000025746 | 1           | 8 | ENSMUSG00000042812, ENSMUSG00000059201,<br>ENSMUSG00000025889, ENSMUSG00000024653,<br>ENSMUSG00000017697, ENSMUSG00000063632,<br>ENSMUSG00000024028, ENSMUSG00000026532 |
| GO:0043462 | regulation of ATPase activity | 1        | 0  |                                                                                                                                                                                                                                                                                                                                                                                                                                                                                                                                                                                                                                                                                                                                                                                                                                                                                        | 0.000619567 | 9 | ENSMUSG00000019478, ENSMUSG00000061723,<br>ENSMUSG00000035458, ENSMUSG00000061086,                                                                                      |

|            |            |                 |    |                                                                                                                                                                                                                                                                                                                                                                                                                                                                                                                                                                                                                                                                                                                                                                                                                                                                                                                                                                                                                           |   |    |                                                                                                                                                                                                                                                                                                                                                                                                                                                                                                                                                                                                                                                                                                             |
|------------|------------|-----------------|----|---------------------------------------------------------------------------------------------------------------------------------------------------------------------------------------------------------------------------------------------------------------------------------------------------------------------------------------------------------------------------------------------------------------------------------------------------------------------------------------------------------------------------------------------------------------------------------------------------------------------------------------------------------------------------------------------------------------------------------------------------------------------------------------------------------------------------------------------------------------------------------------------------------------------------------------------------------------------------------------------------------------------------|---|----|-------------------------------------------------------------------------------------------------------------------------------------------------------------------------------------------------------------------------------------------------------------------------------------------------------------------------------------------------------------------------------------------------------------------------------------------------------------------------------------------------------------------------------------------------------------------------------------------------------------------------------------------------------------------------------------------------------------|
|            |            |                 |    |                                                                                                                                                                                                                                                                                                                                                                                                                                                                                                                                                                                                                                                                                                                                                                                                                                                                                                                                                                                                                           |   |    | ENSMUSG00000032366, ENSMUSG00000091898,<br>ENSMUSG00000021909, ENSMUSG00000028307,<br>ENSMUSG00000040752                                                                                                                                                                                                                                                                                                                                                                                                                                                                                                                                                                                                    |
| GO:0040011 | locomotion | 0.00936050<br>7 | 51 | ENSMUSG00000035352, ENSMUSG00000048534,<br>ENSMUSG00000058427, ENSMUSG00000029379,<br>ENSMUSG00000071005, ENSMUSG00000009185,<br>ENSMUSG00000049103, ENSMUSG00000074115,<br>ENSMUSG00000028613, ENSMUSG00000035385,<br>ENSMUSG00000017724, ENSMUSG00000000392,<br>ENSMUSG00000050232, ENSMUSG00000026166,<br>ENSMUSG00000028072, ENSMUSG00000018930,<br>ENSMUSG00000030786, ENSMUSG00000000247,<br>ENSMUSG00000025804, ENSMUSG00000027398,<br>ENSMUSG00000034855, ENSMUSG00000026890,<br>ENSMUSG00000025473, ENSMUSG00000029005,<br>ENSMUSG00000055170, ENSMUSG00000018920,<br>ENSMUSG00000050957, ENSMUSG00000001444,<br>ENSMUSG00000035042, ENSMUSG00000056529,<br>ENSMUSG00000058715, ENSMUSG00000070691,<br>ENSMUSG00000030525, ENSMUSG00000040552,<br>ENSMUSG00000030077, ENSMUSG00000026573,<br>ENSMUSG00000035373, ENSMUSG00000000982,<br>ENSMUSG00000004296, ENSMUSG00000029304,<br>ENSMUSG00000020310, ENSMUSG00000023078,<br>ENSMUSG00000026582, ENSMUSG00000021614,<br>ENSMUSG00000024401, ENSMUSG00000026580, | 1 | 32 | ENSMUSG00000031380, ENSMUSG00000030302,<br>ENSMUSG00000025810, ENSMUSG00000032547,<br>ENSMUSG00000052911, ENSMUSG00000031841,<br>ENSMUSG00000041012, ENSMUSG00000041688,<br>ENSMUSG00000026874, ENSMUSG00000021055,<br>ENSMUSG00000031253, ENSMUSG00000089865,<br>ENSMUSG00000064201, ENSMUSG00000001948,<br>ENSMUSG00000001300, ENSMUSG00000032216,<br>ENSMUSG00000032064, ENSMUSG00000029193,<br>ENSMUSG00000013076, ENSMUSG00000059201,<br>ENSMUSG00000019326, ENSMUSG00000062380,<br>ENSMUSG00000032911, ENSMUSG00000000889,<br>ENSMUSG00000032083, ENSMUSG00000015405,<br>ENSMUSG00000020052, ENSMUSG00000031780,<br>ENSMUSG00000054196, ENSMUSG00000059481,<br>ENSMUSG00000023235, ENSMUSG00000010047 |



|            |                                |   |    |                                                                                                                                                                                                                                                                                     |             |    |                                                                                                                                                                                                                                                                                                                                                                                                                                                                                                                                                                                                                                                                                                                                                                                                                                                                                                                                                                                                                        |
|------------|--------------------------------|---|----|-------------------------------------------------------------------------------------------------------------------------------------------------------------------------------------------------------------------------------------------------------------------------------------|-------------|----|------------------------------------------------------------------------------------------------------------------------------------------------------------------------------------------------------------------------------------------------------------------------------------------------------------------------------------------------------------------------------------------------------------------------------------------------------------------------------------------------------------------------------------------------------------------------------------------------------------------------------------------------------------------------------------------------------------------------------------------------------------------------------------------------------------------------------------------------------------------------------------------------------------------------------------------------------------------------------------------------------------------------|
|            |                                |   |    | ENSMUSG00000037868, ENSMUSG00000029380,<br>ENSMUSG00000041347, ENSMUSG00000079700,<br>ENSMUSG00000033952                                                                                                                                                                            |             |    |                                                                                                                                                                                                                                                                                                                                                                                                                                                                                                                                                                                                                                                                                                                                                                                                                                                                                                                                                                                                                        |
| GO:0006082 | organic acid metabolic process | 1 | 13 | ENSMUSG00000030268, ENSMUSG00000038963,<br>ENSMUSG0000003484, ENSMUSG00000037440,<br>ENSMUSG00000017146, ENSMUSG00000039519,<br>ENSMUSG00000050370, ENSMUSG00000021266,<br>ENSMUSG00000018907, ENSMUSG00000027199,<br>ENSMUSG00000022126, ENSMUSG00000031551,<br>ENSMUSG00000020010 | 0.000117827 | 56 | ENSMUSG00000037686, ENSMUSG00000032263,<br>ENSMUSG00000033327, ENSMUSG00000032262,<br>ENSMUSG00000025889, ENSMUSG00000062515,<br>ENSMUSG00000020182, ENSMUSG00000046402,<br>ENSMUSG0000002588, ENSMUSG00000002010,<br>ENSMUSG0000004038, ENSMUSG00000032310,<br>ENSMUSG00000032418, ENSMUSG00000027513,<br>ENSMUSG00000032807, ENSMUSG00000032279,<br>ENSMUSG00000067653, ENSMUSG00000019278,<br>ENSMUSG00000074183, ENSMUSG00000037071,<br>ENSMUSG00000029361, ENSMUSG00000032348,<br>ENSMUSG00000025202, ENSMUSG00000025153,<br>ENSMUSG00000057880, ENSMUSG00000073424,<br>ENSMUSG00000002769, ENSMUSG00000022878,<br>ENSMUSG00000078597, ENSMUSG00000030399,<br>ENSMUSG00000032349, ENSMUSG00000059201,<br>ENSMUSG00000066072, ENSMUSG00000021622,<br>ENSMUSG0000004885, ENSMUSG00000024039,<br>ENSMUSG00000030972, ENSMUSG00000040181,<br>ENSMUSG00000058135, ENSMUSG00000000168,<br>ENSMUSG00000031299, ENSMUSG00000025991,<br>ENSMUSG00000032315, ENSMUSG00000027820,<br>ENSMUSG00000090150, ENSMUSG00000022040, |

|            |                                                                                                               |                 |    |                                                                                                                                                                                                                                           |             |    |                                                                                                                                                                                                                                                                                                                                                                                                                                           |
|------------|---------------------------------------------------------------------------------------------------------------|-----------------|----|-------------------------------------------------------------------------------------------------------------------------------------------------------------------------------------------------------------------------------------------|-------------|----|-------------------------------------------------------------------------------------------------------------------------------------------------------------------------------------------------------------------------------------------------------------------------------------------------------------------------------------------------------------------------------------------------------------------------------------------|
|            |                                                                                                               |                 |    |                                                                                                                                                                                                                                           |             |    | ENSMUSG00000075217, ENSMUSG00000028167,<br>ENSMUSG00000031425, ENSMUSG00000024892,<br>ENSMUSG00000029695, ENSMUSG00000041220,<br>ENSMUSG00000035202, ENSMUSG00000050195,<br>ENSMUSG00000020532, ENSMUSG00000027380                                                                                                                                                                                                                        |
| GO:0008217 | regulation of blood pressure                                                                                  | 1               | 5  | ENSMUSG00000030525, ENSMUSG00000040552,<br>ENSMUSG00000041347, ENSMUSG00000031891,<br>ENSMUSG00000054136                                                                                                                                  | 0.001486769 | 20 | ENSMUSG00000020123, ENSMUSG00000035458,<br>ENSMUSG00000059201, ENSMUSG00000032366,<br>ENSMUSG00000019326, ENSMUSG00000041616,<br>ENSMUSG00000001865, ENSMUSG00000061068,<br>ENSMUSG00000022040, ENSMUSG00000031489,<br>ENSMUSG00000015405, ENSMUSG00000022206,<br>ENSMUSG00000029019, ENSMUSG00000029361,<br>ENSMUSG00000037010, ENSMUSG00000031980,<br>ENSMUSG00000057880, ENSMUSG00000022878,<br>ENSMUSG00000024027, ENSMUSG00000040752 |
| GO:0052033 | pathogen-associated<br>molecular pattern dependent<br>induction by symbiont of<br>host innate immune response | 0.00351362<br>7 | 5  | ENSMUSG00000027995, ENSMUSG00000045322,<br>ENSMUSG00000044583, ENSMUSG00000051498,<br>ENSMUSG00000055994                                                                                                                                  | 1           | 0  |                                                                                                                                                                                                                                                                                                                                                                                                                                           |
| GO:0002218 | activation of innate immune<br>response                                                                       | 0.00017316<br>6 | 11 | ENSMUSG00000027995, ENSMUSG00000050241,<br>ENSMUSG00000045322, ENSMUSG00000030413,<br>ENSMUSG00000055994, ENSMUSG00000024349,<br>ENSMUSG00000030149, ENSMUSG00000044583,<br>ENSMUSG00000051498, ENSMUSG00000025473,<br>ENSMUSG00000022901 | 1           | 0  |                                                                                                                                                                                                                                                                                                                                                                                                                                           |
| GO:0043903 | regulation of symbiosis,                                                                                      | 9.75E-06        | 10 | ENSMUSG00000055170, ENSMUSG00000027995,                                                                                                                                                                                                   | 1           | 0  |                                                                                                                                                                                                                                                                                                                                                                                                                                           |

|            |                                                        |                 |    |                                                                                                                                                                                                                                                                                                                                                   |   |   |                                                                                                                        |
|------------|--------------------------------------------------------|-----------------|----|---------------------------------------------------------------------------------------------------------------------------------------------------------------------------------------------------------------------------------------------------------------------------------------------------------------------------------------------------|---|---|------------------------------------------------------------------------------------------------------------------------|
|            | encompassing mutualism through parasitism              |                 |    | ENSMUSG00000029371, ENSMUSG00000041515, ENSMUSG00000055994, ENSMUSG00000024401, ENSMUSG00000038357, ENSMUSG00000016529, ENSMUSG0000004296, ENSMUSG00000079227                                                                                                                                                                                     |   |   |                                                                                                                        |
| GO:0071222 | cellular response to lipopolysaccharide                | 3.29E-08        | 17 | ENSMUSG00000055170, ENSMUSG00000026104, ENSMUSG00000079362, ENSMUSG00000035042, ENSMUSG00000030149, ENSMUSG00000028270, ENSMUSG00000051439, ENSMUSG00000035385, ENSMUSG00000000982, ENSMUSG0000004296, ENSMUSG00000020638, ENSMUSG00000041515, ENSMUSG00000024401, ENSMUSG00000054588, ENSMUSG00000027398, ENSMUSG00000059089, ENSMUSG00000053219 | 1 | 0 |                                                                                                                        |
| GO:0090316 | positive regulation of intracellular protein transport | 0.00860501<br>3 | 13 | ENSMUSG00000019942, ENSMUSG00000027995, ENSMUSG00000045322, ENSMUSG00000071005, ENSMUSG00000024401, ENSMUSG00000027699, ENSMUSG00000024349, ENSMUSG00000040296, ENSMUSG00000020053, ENSMUSG00000044583, ENSMUSG00000025746, ENSMUSG00000027398, ENSMUSG00000078817                                                                                | 1 | 3 | ENSMUSG00000059201, ENSMUSG00000059327, ENSMUSG00000010047                                                             |
| GO:0002252 | immune effector process                                | 1.57E-21        | 47 | ENSMUSG00000027832, ENSMUSG00000040613, ENSMUSG00000036905, ENSMUSG00000040528, ENSMUSG00000027995, ENSMUSG00000036887, ENSMUSG00000035673, ENSMUSG00000029417, ENSMUSG00000066861, ENSMUSG00000037202, ENSMUSG00000015437, ENSMUSG00000053977,                                                                                                   | 1 | 6 | ENSMUSG00000046834, ENSMUSG00000000889, ENSMUSG00000061780, ENSMUSG00000034783, ENSMUSG00000026874, ENSMUSG00000017697 |

|            |                                                                                                                                          |                          |    |                                                                                                                                                                                                                                                                                                                                                                                                                                                                                                                                                                                                                                                                                                                                                                                                                        |   |   |                                                                        |
|------------|------------------------------------------------------------------------------------------------------------------------------------------|--------------------------|----|------------------------------------------------------------------------------------------------------------------------------------------------------------------------------------------------------------------------------------------------------------------------------------------------------------------------------------------------------------------------------------------------------------------------------------------------------------------------------------------------------------------------------------------------------------------------------------------------------------------------------------------------------------------------------------------------------------------------------------------------------------------------------------------------------------------------|---|---|------------------------------------------------------------------------|
|            |                                                                                                                                          |                          |    | <p>ENSMUSG00000032691, ENSMUSG00000020641,<br/> ENSMUSG00000034652, ENSMUSG00000046718,<br/> ENSMUSG00000051498, ENSMUSG00000027639,<br/> ENSMUSG00000034855, ENSMUSG00000055170,<br/> ENSMUSG00000045322, ENSMUSG00000025492,<br/> ENSMUSG00000092005, ENSMUSG00000040751,<br/> ENSMUSG00000055994, ENSMUSG00000039748,<br/> ENSMUSG00000058715, ENSMUSG00000024349,<br/> ENSMUSG00000040627, ENSMUSG00000026573,<br/> ENSMUSG00000024371, ENSMUSG00000000982,<br/> ENSMUSG00000004296, ENSMUSG00000076612,<br/> ENSMUSG00000055172, ENSMUSG00000053175,<br/> ENSMUSG00000015947, ENSMUSG00000022901,<br/> ENSMUSG00000025498, ENSMUSG00000026656,<br/> ENSMUSG00000032661, ENSMUSG00000090231,<br/> ENSMUSG00000058818, ENSMUSG00000048806,<br/> ENSMUSG00000025746, ENSMUSG00000044583,<br/> ENSMUSG00000026177</p> |   |   |                                                                        |
| GO:0052305 | <p>positive regulation by<br/> organism of innate immune<br/> response in other organism<br/> involved in symbiotic<br/> interaction</p> | <p>0.00351362<br/> 7</p> | 5  | <p>ENSMUSG00000027995, ENSMUSG00000045322,<br/> ENSMUSG00000044583, ENSMUSG00000051498,<br/> ENSMUSG00000055994</p>                                                                                                                                                                                                                                                                                                                                                                                                                                                                                                                                                                                                                                                                                                    | 1 | 0 |                                                                        |
| GO:0006959 | humoral immune response                                                                                                                  | 7.09E-05                 | 14 | <p>ENSMUSG00000005696, ENSMUSG00000055170,<br/> ENSMUSG00000036905, ENSMUSG00000036887,<br/> ENSMUSG00000092005, ENSMUSG00000039748,</p>                                                                                                                                                                                                                                                                                                                                                                                                                                                                                                                                                                                                                                                                               | 1 | 3 | <p>ENSMUSG00000046834, ENSMUSG00000061780,<br/> ENSMUSG00000026874</p> |

|            |                      |          |     |                                                                                                                                                                                                                                                                                                                                                                                                                                                                                                                                                                                                                                                                                                                                                                                                                                                                                                                                                                                |   |     |                                                                                                                                                                                                                                                                                                                                                                                                                                                                                                                                                                                                                                                                                                                                                                                                                                                                                                                                                                               |
|------------|----------------------|----------|-----|--------------------------------------------------------------------------------------------------------------------------------------------------------------------------------------------------------------------------------------------------------------------------------------------------------------------------------------------------------------------------------------------------------------------------------------------------------------------------------------------------------------------------------------------------------------------------------------------------------------------------------------------------------------------------------------------------------------------------------------------------------------------------------------------------------------------------------------------------------------------------------------------------------------------------------------------------------------------------------|---|-----|-------------------------------------------------------------------------------------------------------------------------------------------------------------------------------------------------------------------------------------------------------------------------------------------------------------------------------------------------------------------------------------------------------------------------------------------------------------------------------------------------------------------------------------------------------------------------------------------------------------------------------------------------------------------------------------------------------------------------------------------------------------------------------------------------------------------------------------------------------------------------------------------------------------------------------------------------------------------------------|
|            |                      |          |     | ENSMUSG00000024401, ENSMUSG00000090231,<br>ENSMUSG00000048806, ENSMUSG00000024371,<br>ENSMUSG00000049103, ENSMUSG00000076612,<br>ENSMUSG00000055172, ENSMUSG00000053175                                                                                                                                                                                                                                                                                                                                                                                                                                                                                                                                                                                                                                                                                                                                                                                                        |   |     |                                                                                                                                                                                                                                                                                                                                                                                                                                                                                                                                                                                                                                                                                                                                                                                                                                                                                                                                                                               |
| GO:0050896 | response to stimulus | 1.48E-08 | 324 | ENSMUSG00000034206, ENSMUSG00000036931,<br>ENSMUSG00000035692, ENSMUSG00000048534,<br>ENSMUSG00000036887, ENSMUSG00000041481,<br>ENSMUSG00000066861, ENSMUSG00000049103,<br>ENSMUSG00000061232, ENSMUSG00000053977,<br>ENSMUSG00000075404, ENSMUSG00000019942,<br>ENSMUSG00000030268, ENSMUSG00000021190,<br>ENSMUSG00000000817, ENSMUSG00000030786,<br>ENSMUSG00000040296, ENSMUSG00000020053,<br>ENSMUSG00000040264, ENSMUSG00000030144,<br>ENSMUSG00000035365, ENSMUSG00000042489,<br>ENSMUSG00000025473, ENSMUSG00000038037,<br>ENSMUSG00000030954, ENSMUSG00000055994,<br>ENSMUSG00000026896, ENSMUSG00000000982,<br>ENSMUSG00000038067, ENSMUSG00000037474,<br>ENSMUSG00000023913, ENSMUSG00000020897,<br>ENSMUSG00000063660, ENSMUSG00000029075,<br>ENSMUSG00000028068, ENSMUSG00000039315,<br>ENSMUSG00000038418, ENSMUSG00000079014,<br>ENSMUSG00000045381, ENSMUSG00000039396,<br>ENSMUSG00000035352, ENSMUSG00000060747,<br>ENSMUSG00000038209, ENSMUSG00000029377, | 1 | 228 | ENSMUSG00000030302, ENSMUSG00000032547,<br>ENSMUSG00000074254, ENSMUSG00000025889,<br>ENSMUSG00000062270, ENSMUSG00000046532,<br>ENSMUSG00000051596, ENSMUSG00000007122,<br>ENSMUSG00000059230, ENSMUSG00000026715,<br>ENSMUSG00000090877, ENSMUSG00000025888,<br>ENSMUSG00000037188, ENSMUSG00000090639,<br>ENSMUSG00000032549, ENSMUSG00000061393,<br>ENSMUSG00000021909, ENSMUSG00000033208,<br>ENSMUSG00000033350, ENSMUSG00000034910,<br>ENSMUSG0000007033, ENSMUSG00000027513,<br>ENSMUSG00000029195, ENSMUSG00000032449,<br>ENSMUSG00000043496, ENSMUSG00000010051,<br>ENSMUSG00000074183, ENSMUSG00000017697,<br>ENSMUSG00000036867, ENSMUSG00000057933,<br>ENSMUSG00000037010, ENSMUSG00000032348,<br>ENSMUSG00000038967, ENSMUSG00000032076,<br>ENSMUSG00000024027, ENSMUSG00000042812,<br>ENSMUSG00000034768, ENSMUSG00000022868,<br>ENSMUSG00000052974, ENSMUSG00000062380,<br>ENSMUSG00000031214, ENSMUSG00000026984,<br>ENSMUSG00000035486, ENSMUSG00000041616, |

|  |  |  |                                                                                                                                                                                                                                                                                                                                                                                                                                                                                                                                                                                                                                                                                                                                                                                                                                                                                                                                                                                                                                                                                                                                                           |  |                                                                                                                                                                                                                                                                                                                                                                                                                                                                                                                                                                                                                                                                                                                                                                                                                                                                                                                                                                                                                                                                                                                                                          |
|--|--|--|-----------------------------------------------------------------------------------------------------------------------------------------------------------------------------------------------------------------------------------------------------------------------------------------------------------------------------------------------------------------------------------------------------------------------------------------------------------------------------------------------------------------------------------------------------------------------------------------------------------------------------------------------------------------------------------------------------------------------------------------------------------------------------------------------------------------------------------------------------------------------------------------------------------------------------------------------------------------------------------------------------------------------------------------------------------------------------------------------------------------------------------------------------------|--|----------------------------------------------------------------------------------------------------------------------------------------------------------------------------------------------------------------------------------------------------------------------------------------------------------------------------------------------------------------------------------------------------------------------------------------------------------------------------------------------------------------------------------------------------------------------------------------------------------------------------------------------------------------------------------------------------------------------------------------------------------------------------------------------------------------------------------------------------------------------------------------------------------------------------------------------------------------------------------------------------------------------------------------------------------------------------------------------------------------------------------------------------------|
|  |  |  | ENSMUSG00000043263, ENSMUSG00000027199,<br>ENSMUSG00000032691, ENSMUSG00000033355,<br>ENSMUSG00000030413, ENSMUSG00000027398,<br>ENSMUSG00000027639, ENSMUSG00000028362,<br>ENSMUSG00000034987, ENSMUSG00000029005,<br>ENSMUSG00000055170, ENSMUSG00000035042,<br>ENSMUSG00000044170, ENSMUSG00000030077,<br>ENSMUSG00000017832, ENSMUSG00000026475,<br>ENSMUSG0000000791, ENSMUSG00000050896,<br>ENSMUSG00000018486, ENSMUSG00000037440,<br>ENSMUSG00000074896, ENSMUSG00000034394,<br>ENSMUSG00000078920, ENSMUSG00000024401,<br>ENSMUSG00000090231, ENSMUSG00000054588,<br>ENSMUSG00000026580, ENSMUSG00000037868,<br>ENSMUSG00000038304, ENSMUSG00000049109,<br>ENSMUSG00000004328, ENSMUSG00000079700,<br>ENSMUSG00000071713, ENSMUSG00000033777,<br>ENSMUSG00000058755, ENSMUSG00000066363,<br>ENSMUSG00000009185, ENSMUSG00000015437,<br>ENSMUSG00000017724, ENSMUSG00000026073,<br>ENSMUSG00000060550, ENSMUSG00000078452,<br>ENSMUSG00000070034, ENSMUSG00000047511,<br>ENSMUSG00000040253, ENSMUSG00000026222,<br>ENSMUSG00000025804, ENSMUSG00000034652,<br>ENSMUSG00000046718, ENSMUSG00000051498,<br>ENSMUSG00000045932, ENSMUSG00000021091, |  | ENSMUSG00000033544, ENSMUSG00000091898,<br>ENSMUSG00000032315, ENSMUSG00000059327,<br>ENSMUSG00000053040, ENSMUSG00000027820,<br>ENSMUSG00000032491, ENSMUSG00000037493,<br>ENSMUSG00000023013, ENSMUSG00000051431,<br>ENSMUSG00000032356, ENSMUSG00000032083,<br>ENSMUSG00000028989, ENSMUSG00000032375,<br>ENSMUSG00000031780, ENSMUSG00000059481,<br>ENSMUSG00000031355, ENSMUSG00000042903,<br>ENSMUSG00000054196, ENSMUSG0000006235,<br>ENSMUSG00000055632, ENSMUSG00000031980,<br>ENSMUSG00000040412, ENSMUSG00000031380,<br>ENSMUSG00000031519, ENSMUSG00000030730,<br>ENSMUSG00000012705, ENSMUSG00000033831,<br>ENSMUSG00000033196, ENSMUSG00000031312,<br>ENSMUSG00000025270, ENSMUSG00000052911,<br>ENSMUSG00000032380, ENSMUSG00000046714,<br>ENSMUSG00000031841, ENSMUSG00000031844,<br>ENSMUSG00000032554, ENSMUSG00000033577,<br>ENSMUSG00000021319, ENSMUSG00000041688,<br>ENSMUSG00000031996, ENSMUSG00000020889,<br>ENSMUSG0000005705, ENSMUSG00000022996,<br>ENSMUSG00000019278, ENSMUSG00000032216,<br>ENSMUSG00000020623, ENSMUSG00000032060,<br>ENSMUSG00000029019, ENSMUSG00000030244,<br>ENSMUSG00000029361, ENSMUSG00000032528, |
|--|--|--|-----------------------------------------------------------------------------------------------------------------------------------------------------------------------------------------------------------------------------------------------------------------------------------------------------------------------------------------------------------------------------------------------------------------------------------------------------------------------------------------------------------------------------------------------------------------------------------------------------------------------------------------------------------------------------------------------------------------------------------------------------------------------------------------------------------------------------------------------------------------------------------------------------------------------------------------------------------------------------------------------------------------------------------------------------------------------------------------------------------------------------------------------------------|--|----------------------------------------------------------------------------------------------------------------------------------------------------------------------------------------------------------------------------------------------------------------------------------------------------------------------------------------------------------------------------------------------------------------------------------------------------------------------------------------------------------------------------------------------------------------------------------------------------------------------------------------------------------------------------------------------------------------------------------------------------------------------------------------------------------------------------------------------------------------------------------------------------------------------------------------------------------------------------------------------------------------------------------------------------------------------------------------------------------------------------------------------------------|

|  |  |  |                                                                                                                                                                                                                                                                                                                                                                                                                                                                                                                                                                                                                                                                                                                                                                                                                                                                                                                                                                                                                                                                                                                                                         |  |                                                                                                                                                                                                                                                                                                                                                                                                                                                                                                                                                                                                                                                                                                                                                                                                                                                                                                                                                                                                                                                                                                                                                            |
|--|--|--|---------------------------------------------------------------------------------------------------------------------------------------------------------------------------------------------------------------------------------------------------------------------------------------------------------------------------------------------------------------------------------------------------------------------------------------------------------------------------------------------------------------------------------------------------------------------------------------------------------------------------------------------------------------------------------------------------------------------------------------------------------------------------------------------------------------------------------------------------------------------------------------------------------------------------------------------------------------------------------------------------------------------------------------------------------------------------------------------------------------------------------------------------------|--|------------------------------------------------------------------------------------------------------------------------------------------------------------------------------------------------------------------------------------------------------------------------------------------------------------------------------------------------------------------------------------------------------------------------------------------------------------------------------------------------------------------------------------------------------------------------------------------------------------------------------------------------------------------------------------------------------------------------------------------------------------------------------------------------------------------------------------------------------------------------------------------------------------------------------------------------------------------------------------------------------------------------------------------------------------------------------------------------------------------------------------------------------------|
|  |  |  | ENSMUSG0000000182, ENSMUSG00000079019,<br>ENSMUSG00000033470, ENSMUSG00000039236,<br>ENSMUSG00000079362, ENSMUSG00000070427,<br>ENSMUSG00000022548, ENSMUSG00000038357,<br>ENSMUSG0000002068, ENSMUSG00000030793,<br>ENSMUSG0000003283, ENSMUSG00000051235,<br>ENSMUSG00000030867, ENSMUSG00000044138,<br>ENSMUSG00000048806, ENSMUSG00000044583,<br>ENSMUSG00000029380, ENSMUSG00000078817,<br>ENSMUSG00000021451, ENSMUSG00000027832,<br>ENSMUSG00000078922, ENSMUSG00000030017,<br>ENSMUSG00000035673, ENSMUSG00000031444,<br>ENSMUSG00000034730, ENSMUSG00000020641,<br>ENSMUSG00000030677, ENSMUSG00000073411,<br>ENSMUSG00000020638, ENSMUSG00000017146,<br>ENSMUSG00000029915, ENSMUSG00000026011,<br>ENSMUSG00000030117, ENSMUSG00000027514,<br>ENSMUSG00000041324, ENSMUSG00000021423,<br>ENSMUSG00000031765, ENSMUSG00000028602,<br>ENSMUSG00000028269, ENSMUSG00000056529,<br>ENSMUSG00000046688, ENSMUSG00000026573,<br>ENSMUSG00000026981, ENSMUSG00000021697,<br>ENSMUSG00000049734, ENSMUSG00000022901,<br>ENSMUSG00000021886, ENSMUSG00000029371,<br>ENSMUSG00000045471, ENSMUSG00000044827,<br>ENSMUSG00000032661, ENSMUSG00000046879, |  | ENSMUSG00000038119, ENSMUSG00000057880,<br>ENSMUSG00000040752, ENSMUSG00000031216,<br>ENSMUSG00000041658, ENSMUSG00000019326,<br>ENSMUSG00000005373, ENSMUSG00000025386,<br>ENSMUSG00000035459, ENSMUSG00000000889,<br>ENSMUSG00000040146, ENSMUSG00000031144,<br>ENSMUSG00000032081, ENSMUSG00000032500,<br>ENSMUSG00000024653, ENSMUSG00000031377,<br>ENSMUSG00000062778, ENSMUSG00000020052,<br>ENSMUSG00000029120, ENSMUSG00000023235,<br>ENSMUSG00000032251, ENSMUSG00000020532,<br>ENSMUSG00000010047, ENSMUSG00000020475,<br>ENSMUSG00000009471, ENSMUSG00000020123,<br>ENSMUSG00000031495, ENSMUSG00000062515,<br>ENSMUSG00000034783, ENSMUSG00000070570,<br>ENSMUSG00000026304, ENSMUSG00000032511,<br>ENSMUSG00000020884, ENSMUSG00000020182,<br>ENSMUSG00000020524, ENSMUSG00000067951,<br>ENSMUSG00000039278, ENSMUSG00000032310,<br>ENSMUSG00000026874, ENSMUSG00000039004,<br>ENSMUSG00000032418, ENSMUSG00000059495,<br>ENSMUSG00000001948, ENSMUSG00000031760,<br>ENSMUSG00000019102, ENSMUSG00000032839,<br>ENSMUSG00000037071, ENSMUSG00000041696,<br>ENSMUSG00000026459, ENSMUSG00000038776,<br>ENSMUSG00000029193, ENSMUSG00000061958, |
|--|--|--|---------------------------------------------------------------------------------------------------------------------------------------------------------------------------------------------------------------------------------------------------------------------------------------------------------------------------------------------------------------------------------------------------------------------------------------------------------------------------------------------------------------------------------------------------------------------------------------------------------------------------------------------------------------------------------------------------------------------------------------------------------------------------------------------------------------------------------------------------------------------------------------------------------------------------------------------------------------------------------------------------------------------------------------------------------------------------------------------------------------------------------------------------------|--|------------------------------------------------------------------------------------------------------------------------------------------------------------------------------------------------------------------------------------------------------------------------------------------------------------------------------------------------------------------------------------------------------------------------------------------------------------------------------------------------------------------------------------------------------------------------------------------------------------------------------------------------------------------------------------------------------------------------------------------------------------------------------------------------------------------------------------------------------------------------------------------------------------------------------------------------------------------------------------------------------------------------------------------------------------------------------------------------------------------------------------------------------------|

|  |  |  |                                                                                                                                                                                                                                                                                                                                                                                                                                                                                                                                                                                                                                                                                                                                                                                                                                                                                                                                                                                                                                                                                                                                                           |  |                                                                                                                                                                                                                                                                                                                                                                                                                                                                                                                                                                                                                                                                                                                                                                                                                                                                                                                                                                                                                                                                                                                                                           |
|--|--|--|-----------------------------------------------------------------------------------------------------------------------------------------------------------------------------------------------------------------------------------------------------------------------------------------------------------------------------------------------------------------------------------------------------------------------------------------------------------------------------------------------------------------------------------------------------------------------------------------------------------------------------------------------------------------------------------------------------------------------------------------------------------------------------------------------------------------------------------------------------------------------------------------------------------------------------------------------------------------------------------------------------------------------------------------------------------------------------------------------------------------------------------------------------------|--|-----------------------------------------------------------------------------------------------------------------------------------------------------------------------------------------------------------------------------------------------------------------------------------------------------------------------------------------------------------------------------------------------------------------------------------------------------------------------------------------------------------------------------------------------------------------------------------------------------------------------------------------------------------------------------------------------------------------------------------------------------------------------------------------------------------------------------------------------------------------------------------------------------------------------------------------------------------------------------------------------------------------------------------------------------------------------------------------------------------------------------------------------------------|
|  |  |  | ENSMUSG00000034438, ENSMUSG00000024339,<br>ENSMUSG00000041347, ENSMUSG00000054136,<br>ENSMUSG00000027995, ENSMUSG00000007080,<br>ENSMUSG00000050107, ENSMUSG00000027699,<br>ENSMUSG00000003617, ENSMUSG00000017830,<br>ENSMUSG00000078853, ENSMUSG00000022831,<br>ENSMUSG00000005640, ENSMUSG00000050232,<br>ENSMUSG00000047293, ENSMUSG00000054203,<br>ENSMUSG00000022504, ENSMUSG00000001123,<br>ENSMUSG00000000247, ENSMUSG00000037321,<br>ENSMUSG00000031551, ENSMUSG00000030142,<br>ENSMUSG00000026068, ENSMUSG00000045322,<br>ENSMUSG00000069874, ENSMUSG00000025492,<br>ENSMUSG0000001228, ENSMUSG00000030149,<br>ENSMUSG00000037313, ENSMUSG00000009292,<br>ENSMUSG00000029304, ENSMUSG00000025739,<br>ENSMUSG00000002307, ENSMUSG00000053175,<br>ENSMUSG00000026656, ENSMUSG00000026582,<br>ENSMUSG00000030124, ENSMUSG00000028268,<br>ENSMUSG00000022221, ENSMUSG00000058818,<br>ENSMUSG00000022126, ENSMUSG00000024079,<br>ENSMUSG00000029664, ENSMUSG00000040528,<br>ENSMUSG00000036905, ENSMUSG00000040613,<br>ENSMUSG00000074151, ENSMUSG00000003665,<br>ENSMUSG00000026822, ENSMUSG00000029379,<br>ENSMUSG00000031762, ENSMUSG00000026429, |  | ENSMUSG00000040289, ENSMUSG00000090372,<br>ENSMUSG00000079355, ENSMUSG00000022878,<br>ENSMUSG00000013076, ENSMUSG00000062713,<br>ENSMUSG00000059201, ENSMUSG00000027077,<br>ENSMUSG00000050730, ENSMUSG00000001494,<br>ENSMUSG00000000049, ENSMUSG00000044338,<br>ENSMUSG00000073975, ENSMUSG00000050164,<br>ENSMUSG00000022040, ENSMUSG00000024990,<br>ENSMUSG00000039585, ENSMUSG00000092137,<br>ENSMUSG00000029205, ENSMUSG00000015405,<br>ENSMUSG00000031425, ENSMUSG00000031204,<br>ENSMUSG00000032531, ENSMUSG00000031134,<br>ENSMUSG00000025810, ENSMUSG00000027796,<br>ENSMUSG00000049556, ENSMUSG00000029368,<br>ENSMUSG00000040488, ENSMUSG00000031757,<br>ENSMUSG00000057003, ENSMUSG00000061780,<br>ENSMUSG00000024500, ENSMUSG00000055980,<br>ENSMUSG00000018893, ENSMUSG00000029236,<br>ENSMUSG00000046402, ENSMUSG0000005182,<br>ENSMUSG00000041012, ENSMUSG00000024028,<br>ENSMUSG00000001986, ENSMUSG00000078658,<br>ENSMUSG00000018566, ENSMUSG00000021055,<br>ENSMUSG00000005547, ENSMUSG00000031431,<br>ENSMUSG00000041361, ENSMUSG00000031489,<br>ENSMUSG00000053310, ENSMUSG00000001300,<br>ENSMUSG00000091971, ENSMUSG00000032064, |
|--|--|--|-----------------------------------------------------------------------------------------------------------------------------------------------------------------------------------------------------------------------------------------------------------------------------------------------------------------------------------------------------------------------------------------------------------------------------------------------------------------------------------------------------------------------------------------------------------------------------------------------------------------------------------------------------------------------------------------------------------------------------------------------------------------------------------------------------------------------------------------------------------------------------------------------------------------------------------------------------------------------------------------------------------------------------------------------------------------------------------------------------------------------------------------------------------|--|-----------------------------------------------------------------------------------------------------------------------------------------------------------------------------------------------------------------------------------------------------------------------------------------------------------------------------------------------------------------------------------------------------------------------------------------------------------------------------------------------------------------------------------------------------------------------------------------------------------------------------------------------------------------------------------------------------------------------------------------------------------------------------------------------------------------------------------------------------------------------------------------------------------------------------------------------------------------------------------------------------------------------------------------------------------------------------------------------------------------------------------------------------------|



|  |  |  |                                                                                                                                                                                                                                                                                                                                                                                                                                                                                                                                                                                                                                                                                                                                                                                                                                                                                                                                                                                                                                                                                                                                                            |  |  |                                                                                                                                                                                                                                                                                                                                                                                                                                                                                                                                                                                                                       |
|--|--|--|------------------------------------------------------------------------------------------------------------------------------------------------------------------------------------------------------------------------------------------------------------------------------------------------------------------------------------------------------------------------------------------------------------------------------------------------------------------------------------------------------------------------------------------------------------------------------------------------------------------------------------------------------------------------------------------------------------------------------------------------------------------------------------------------------------------------------------------------------------------------------------------------------------------------------------------------------------------------------------------------------------------------------------------------------------------------------------------------------------------------------------------------------------|--|--|-----------------------------------------------------------------------------------------------------------------------------------------------------------------------------------------------------------------------------------------------------------------------------------------------------------------------------------------------------------------------------------------------------------------------------------------------------------------------------------------------------------------------------------------------------------------------------------------------------------------------|
|  |  |  | ENSMUSG00000071005, ENSMUSG00000029811,<br>ENSMUSG00000051439, ENSMUSG00000037202,<br>ENSMUSG00000031504, ENSMUSG00000024842,<br>ENSMUSG00000039997, ENSMUSG00000026535,<br>ENSMUSG00000059089, ENSMUSG00000034459,<br>ENSMUSG00000061577, ENSMUSG00000068227,<br>ENSMUSG00000079363, ENSMUSG00000039899,<br>ENSMUSG00000027843, ENSMUSG00000039748,<br>ENSMUSG00000034329, ENSMUSG00000071714,<br>ENSMUSG00000058715, ENSMUSG00000023015,<br>ENSMUSG00000076612, ENSMUSG00000004296,<br>ENSMUSG00000015947, ENSMUSG00000021624,<br>ENSMUSG00000040026, ENSMUSG00000041515,<br>ENSMUSG00000023078, ENSMUSG00000020415,<br>ENSMUSG00000026358, ENSMUSG00000036986,<br>ENSMUSG00000039519, ENSMUSG00000028971,<br>ENSMUSG00000025746, ENSMUSG00000053101,<br>ENSMUSG00000053113, ENSMUSG00000066361,<br>ENSMUSG00000025165, ENSMUSG00000026271,<br>ENSMUSG00000066513, ENSMUSG00000060802,<br>ENSMUSG00000042607, ENSMUSG00000046908,<br>ENSMUSG00000079563, ENSMUSG00000018899,<br>ENSMUSG00000016529, ENSMUSG00000052759,<br>ENSMUSG00000037731, ENSMUSG00000028072,<br>ENSMUSG00000030148, ENSMUSG00000018930,<br>ENSMUSG00000020684, ENSMUSG00000029605, |  |  | ENSMUSG00000024386, ENSMUSG00000046834,<br>ENSMUSG00000060180, ENSMUSG00000073465,<br>ENSMUSG00000038204, ENSMUSG00000050071,<br>ENSMUSG00000032570, ENSMUSG00000032911,<br>ENSMUSG00000024039, ENSMUSG00000079278,<br>ENSMUSG00000032558, ENSMUSG00000036216,<br>ENSMUSG00000007815, ENSMUSG00000025991,<br>ENSMUSG00000041748, ENSMUSG00000027559,<br>ENSMUSG00000029669, ENSMUSG00000025656,<br>ENSMUSG00000019478, ENSMUSG00000044359,<br>ENSMUSG00000033763, ENSMUSG00000051456,<br>ENSMUSG00000030747, ENSMUSG00000028036,<br>ENSMUSG00000056978, ENSMUSG00000022206,<br>ENSMUSG00000037624, ENSMUSG00000028307 |
|--|--|--|------------------------------------------------------------------------------------------------------------------------------------------------------------------------------------------------------------------------------------------------------------------------------------------------------------------------------------------------------------------------------------------------------------------------------------------------------------------------------------------------------------------------------------------------------------------------------------------------------------------------------------------------------------------------------------------------------------------------------------------------------------------------------------------------------------------------------------------------------------------------------------------------------------------------------------------------------------------------------------------------------------------------------------------------------------------------------------------------------------------------------------------------------------|--|--|-----------------------------------------------------------------------------------------------------------------------------------------------------------------------------------------------------------------------------------------------------------------------------------------------------------------------------------------------------------------------------------------------------------------------------------------------------------------------------------------------------------------------------------------------------------------------------------------------------------------------|

|  |  |  |                                                                                                                                                                                                                                                                                                                                                                                                                                                                                                                                                                                                                                                                                                                                                                                                                                                                                                                                                                                                                                                                                                                                                            |  |  |  |
|--|--|--|------------------------------------------------------------------------------------------------------------------------------------------------------------------------------------------------------------------------------------------------------------------------------------------------------------------------------------------------------------------------------------------------------------------------------------------------------------------------------------------------------------------------------------------------------------------------------------------------------------------------------------------------------------------------------------------------------------------------------------------------------------------------------------------------------------------------------------------------------------------------------------------------------------------------------------------------------------------------------------------------------------------------------------------------------------------------------------------------------------------------------------------------------------|--|--|--|
|  |  |  | ENSMUSG00000058207, ENSMUSG00000049502,<br>ENSMUSG00000023341, ENSMUSG00000046591,<br>ENSMUSG00000022534, ENSMUSG00000078773,<br>ENSMUSG00000054072, ENSMUSG00000032586,<br>ENSMUSG00000034855, ENSMUSG00000061972,<br>ENSMUSG00000091875, ENSMUSG00000026770,<br>ENSMUSG00000044701, ENSMUSG00000005696,<br>ENSMUSG00000028718, ENSMUSG00000018920,<br>ENSMUSG00000040751, ENSMUSG00000040133,<br>ENSMUSG00000070691, ENSMUSG00000030525,<br>ENSMUSG00000040552, ENSMUSG00000040627,<br>ENSMUSG00000028270, ENSMUSG00000035373,<br>ENSMUSG00000024371, ENSMUSG00000057465,<br>ENSMUSG00000055172, ENSMUSG00000025498,<br>ENSMUSG00000050241, ENSMUSG00000050635,<br>ENSMUSG00000079017, ENSMUSG00000022622,<br>ENSMUSG00000036362, ENSMUSG00000000386,<br>ENSMUSG00000053219, ENSMUSG00000037872,<br>ENSMUSG00000074148, ENSMUSG00000040328,<br>ENSMUSG00000071311, ENSMUSG00000024791,<br>ENSMUSG00000058427, ENSMUSG00000029417,<br>ENSMUSG00000029298, ENSMUSG00000074115,<br>ENSMUSG00000029378, ENSMUSG00000035385,<br>ENSMUSG00000040017, ENSMUSG00000026166,<br>ENSMUSG00000004952, ENSMUSG00000028874,<br>ENSMUSG00000037860, ENSMUSG00000030365, |  |  |  |
|--|--|--|------------------------------------------------------------------------------------------------------------------------------------------------------------------------------------------------------------------------------------------------------------------------------------------------------------------------------------------------------------------------------------------------------------------------------------------------------------------------------------------------------------------------------------------------------------------------------------------------------------------------------------------------------------------------------------------------------------------------------------------------------------------------------------------------------------------------------------------------------------------------------------------------------------------------------------------------------------------------------------------------------------------------------------------------------------------------------------------------------------------------------------------------------------|--|--|--|

|            |                                                     |                 |    |                                                                                                                                                                                                                                                                                                                                                                                                                                                                                                                                |   |    |                                                                                                                                                                          |
|------------|-----------------------------------------------------|-----------------|----|--------------------------------------------------------------------------------------------------------------------------------------------------------------------------------------------------------------------------------------------------------------------------------------------------------------------------------------------------------------------------------------------------------------------------------------------------------------------------------------------------------------------------------|---|----|--------------------------------------------------------------------------------------------------------------------------------------------------------------------------|
|            |                                                     |                 |    | ENSMUSG00000073489, ENSMUSG00000079227,<br>ENSMUSG00000049608, ENSMUSG00000036469,<br>ENSMUSG00000067212, ENSMUSG00000026104,<br>ENSMUSG00000092005, ENSMUSG00000090894,<br>ENSMUSG00000024349, ENSMUSG00000056494,<br>ENSMUSG00000024798, ENSMUSG00000073555,<br>ENSMUSG00000050075, ENSMUSG00000024529,<br>ENSMUSG00000034116, ENSMUSG00000079012,<br>ENSMUSG00000021765, ENSMUSG00000039146,<br>ENSMUSG00000063234, ENSMUSG00000026177                                                                                      |   |    |                                                                                                                                                                          |
| GO:0002706 | regulation of lymphocyte mediated immunity          | 1.71E-11        | 24 | ENSMUSG0000005696, ENSMUSG00000055170,<br>ENSMUSG00000060802, ENSMUSG00000001444,<br>ENSMUSG00000055994, ENSMUSG00000058715,<br>ENSMUSG00000030149, ENSMUSG00000026573,<br>ENSMUSG00000061232, ENSMUSG00000073406,<br>ENSMUSG00000004296, ENSMUSG00000015947,<br>ENSMUSG00000073411, ENSMUSG00000026656,<br>ENSMUSG00000050241, ENSMUSG00000030124,<br>ENSMUSG00000079620, ENSMUSG00000079298,<br>ENSMUSG00000024401, ENSMUSG00000024339,<br>ENSMUSG00000048806, ENSMUSG00000030895,<br>ENSMUSG00000037321, ENSMUSG00000067212 | 1 | 2  | ENSMUSG00000090877, ENSMUSG00000032076                                                                                                                                   |
| GO:0070201 | regulation of establishment of protein localization | 0.00082250<br>1 | 29 | ENSMUSG00000030142, ENSMUSG00000055170,<br>ENSMUSG00000027995, ENSMUSG00000045322,<br>ENSMUSG00000055994, ENSMUSG00000022548,<br>ENSMUSG00000071005, ENSMUSG00000027699,                                                                                                                                                                                                                                                                                                                                                       | 1 | 13 | ENSMUSG00000024990, ENSMUSG00000034584,<br>ENSMUSG00000031495, ENSMUSG00000059201,<br>ENSMUSG00000032083, ENSMUSG00000046532,<br>ENSMUSG00000062778, ENSMUSG00000059327, |

|            |                                      |          |    |                                                                                                                                                                                                                                                                                                                                                                                                                                                                  |          |    |                                                                                                                                                                                                                                                                                                                                                                                                                                                                                                                                 |
|------------|--------------------------------------|----------|----|------------------------------------------------------------------------------------------------------------------------------------------------------------------------------------------------------------------------------------------------------------------------------------------------------------------------------------------------------------------------------------------------------------------------------------------------------------------|----------|----|---------------------------------------------------------------------------------------------------------------------------------------------------------------------------------------------------------------------------------------------------------------------------------------------------------------------------------------------------------------------------------------------------------------------------------------------------------------------------------------------------------------------------------|
|            |                                      |          |    | ENSMUSG00000024349, ENSMUSG00000051439,<br>ENSMUSG00000074115, ENSMUSG00000016529,<br>ENSMUSG00000037313, ENSMUSG00000000982,<br>ENSMUSG00000032691, ENSMUSG00000019942,<br>ENSMUSG00000029075, ENSMUSG00000030793,<br>ENSMUSG00000028874, ENSMUSG00000029915,<br>ENSMUSG00000024401, ENSMUSG00000040296,<br>ENSMUSG00000020053, ENSMUSG00000044583,<br>ENSMUSG00000025746, ENSMUSG00000027398,<br>ENSMUSG00000044811, ENSMUSG00000079227,<br>ENSMUSG00000078817 |          |    | ENSMUSG00000026874, ENSMUSG00000032076,<br>ENSMUSG00000022878, ENSMUSG00000010047,<br>ENSMUSG00000024526                                                                                                                                                                                                                                                                                                                                                                                                                        |
| GO:0006936 | muscle contraction                   | 1        | 0  |                                                                                                                                                                                                                                                                                                                                                                                                                                                                  | 1.20E-09 | 24 | ENSMUSG00000064179, ENSMUSG00000035458,<br>ENSMUSG00000032366, ENSMUSG00000027470,<br>ENSMUSG00000033196, ENSMUSG00000057003,<br>ENSMUSG00000091898, ENSMUSG00000053093,<br>ENSMUSG00000021909, ENSMUSG00000006457,<br>ENSMUSG00000017300, ENSMUSG00000061816,<br>ENSMUSG00000061723, ENSMUSG00000031097,<br>ENSMUSG00000061086, ENSMUSG00000020216,<br>ENSMUSG00000020623, ENSMUSG00000020061,<br>ENSMUSG00000059741, ENSMUSG00000052374,<br>ENSMUSG00000029361, ENSMUSG00000031980,<br>ENSMUSG00000040752, ENSMUSG00000020475 |
| GO:0071216 | cellular response to biotic stimulus | 9.84E-11 | 22 | ENSMUSG00000055170, ENSMUSG00000027995,<br>ENSMUSG00000026104, ENSMUSG00000079362,<br>ENSMUSG00000035042, ENSMUSG00000055994,                                                                                                                                                                                                                                                                                                                                    | 1        | 0  |                                                                                                                                                                                                                                                                                                                                                                                                                                                                                                                                 |

|            |                                                   |                 |    |                                                                                                                                                                                                                                                                                                                                                                                                |   |   |                                                                                                                                                                                                |
|------------|---------------------------------------------------|-----------------|----|------------------------------------------------------------------------------------------------------------------------------------------------------------------------------------------------------------------------------------------------------------------------------------------------------------------------------------------------------------------------------------------------|---|---|------------------------------------------------------------------------------------------------------------------------------------------------------------------------------------------------|
|            |                                                   |                 |    | ENSMUSG00000030149, ENSMUSG00000028270,<br>ENSMUSG00000051439, ENSMUSG00000035385,<br>ENSMUSG00000000982, ENSMUSG00000004296,<br>ENSMUSG00000026656, ENSMUSG00000020638,<br>ENSMUSG00000041515, ENSMUSG00000044827,<br>ENSMUSG00000024401, ENSMUSG00000054588,<br>ENSMUSG00000027398, ENSMUSG00000051498,<br>ENSMUSG00000059089, ENSMUSG00000053219                                            |   |   |                                                                                                                                                                                                |
| GO:0001914 | regulation of T cell mediated cytotoxicity        | 0.00018032      | 9  | ENSMUSG00000073411, ENSMUSG00000060802,<br>ENSMUSG00000079620, ENSMUSG00000024339,<br>ENSMUSG00000026573, ENSMUSG00000061232,<br>ENSMUSG00000037321, ENSMUSG00000004296,<br>ENSMUSG00000067212                                                                                                                                                                                                 | 1 | 0 |                                                                                                                                                                                                |
| GO:0044130 | negative regulation of growth of symbiont in host | 0.00049450<br>7 | 8  | ENSMUSG00000055170, ENSMUSG00000027995,<br>ENSMUSG00000041515, ENSMUSG00000055994,<br>ENSMUSG00000024401, ENSMUSG00000038357,<br>ENSMUSG00000016529, ENSMUSG00000004296                                                                                                                                                                                                                        | 1 | 0 |                                                                                                                                                                                                |
| GO:0050708 | regulation of protein secretion                   | 0.00057050<br>9 | 18 | ENSMUSG00000030142, ENSMUSG00000055170,<br>ENSMUSG00000027995, ENSMUSG00000055994,<br>ENSMUSG00000051439, ENSMUSG00000074115,<br>ENSMUSG00000016529, ENSMUSG00000000982,<br>ENSMUSG00000032691, ENSMUSG00000030793,<br>ENSMUSG00000029075, ENSMUSG00000028874,<br>ENSMUSG00000029915, ENSMUSG00000024401,<br>ENSMUSG00000025746, ENSMUSG00000044811,<br>ENSMUSG00000078817, ENSMUSG00000079227 | 1 | 9 | ENSMUSG00000024990, ENSMUSG00000034584,<br>ENSMUSG00000031495, ENSMUSG00000032083,<br>ENSMUSG00000062778, ENSMUSG00000026874,<br>ENSMUSG00000032076, ENSMUSG00000024526,<br>ENSMUSG00000010047 |

|            |                                                                                                        |                 |    |                                                                                                                                                                                                                                                                                                                                                                                                                                                         |   |   |                                                                                                                        |
|------------|--------------------------------------------------------------------------------------------------------|-----------------|----|---------------------------------------------------------------------------------------------------------------------------------------------------------------------------------------------------------------------------------------------------------------------------------------------------------------------------------------------------------------------------------------------------------------------------------------------------------|---|---|------------------------------------------------------------------------------------------------------------------------|
| GO:0042993 | positive regulation of transcription factor import into nucleus                                        | 0.00090214<br>5 | 9  | ENSMUSG00000027995, ENSMUSG000000045322, ENSMUSG00000071005, ENSMUSG00000024401, ENSMUSG00000024349, ENSMUSG00000040296, ENSMUSG00000044583, ENSMUSG00000027398, ENSMUSG00000078817                                                                                                                                                                                                                                                                     | 1 | 0 |                                                                                                                        |
| GO:0052555 | positive regulation by organism of immune response of other organism involved in symbiotic interaction | 0.00351362<br>7 | 5  | ENSMUSG00000027995, ENSMUSG000000045322, ENSMUSG00000044583, ENSMUSG00000051498, ENSMUSG00000055994                                                                                                                                                                                                                                                                                                                                                     | 1 | 0 |                                                                                                                        |
| GO:0032755 | positive regulation of interleukin-6 production                                                        | 0.00605043<br>7 | 9  | ENSMUSG00000027995, ENSMUSG000000045322, ENSMUSG00000055994, ENSMUSG00000024401, ENSMUSG00000058715, ENSMUSG00000044583, ENSMUSG00000025746, ENSMUSG00000027398, ENSMUSG00000079227                                                                                                                                                                                                                                                                     | 1 | 0 |                                                                                                                        |
| GO:0000087 | M phase of mitotic cell cycle                                                                          | 4.20E-19        | 49 | ENSMUSG00000017716, ENSMUSG00000015880, ENSMUSG00000024791, ENSMUSG00000050107, ENSMUSG00000045273, ENSMUSG00000024989, ENSMUSG00000026605, ENSMUSG00000068744, ENSMUSG00000019942, ENSMUSG000000045328, ENSMUSG00000006398, ENSMUSG00000028873, ENSMUSG0000002055, ENSMUSG00000027379, ENSMUSG00000024056, ENSMUSG00000027469, ENSMUSG00000027331, ENSMUSG00000027715, ENSMUSG00000029414, ENSMUSG00000044201, ENSMUSG00000026683, ENSMUSG00000023505, | 1 | 6 | ENSMUSG00000007815, ENSMUSG00000025862, ENSMUSG00000001403, ENSMUSG00000062380, ENSMUSG00000031176, ENSMUSG00000036782 |

|            |                                                  |          |    |                                                                                                                                                                                                                                                                                                                                                                                                                                                                                                                                                                                                   |   |   |                                        |
|------------|--------------------------------------------------|----------|----|---------------------------------------------------------------------------------------------------------------------------------------------------------------------------------------------------------------------------------------------------------------------------------------------------------------------------------------------------------------------------------------------------------------------------------------------------------------------------------------------------------------------------------------------------------------------------------------------------|---|---|----------------------------------------|
|            |                                                  |          |    | ENSMUSG00000041431, ENSMUSG00000040084,<br>ENSMUSG00000036223, ENSMUSG00000027306,<br>ENSMUSG00000023015, ENSMUSG00000024795,<br>ENSMUSG00000069910, ENSMUSG00000025001,<br>ENSMUSG00000048922, ENSMUSG00000051378,<br>ENSMUSG00000020897, ENSMUSG00000017499,<br>ENSMUSG00000071350, ENSMUSG00000020415,<br>ENSMUSG00000037544, ENSMUSG00000028678,<br>ENSMUSG00000012443, ENSMUSG00000030867,<br>ENSMUSG00000074476, ENSMUSG00000017861,<br>ENSMUSG00000023940, ENSMUSG00000072082,<br>ENSMUSG00000026779, ENSMUSG00000033952,<br>ENSMUSG00000058290, ENSMUSG00000032218,<br>ENSMUSG00000027496 |   |   |                                        |
| GO:0045089 | positive regulation of innate<br>immune response | 3.21E-06 | 16 | ENSMUSG0000005696, ENSMUSG00000027995,<br>ENSMUSG00000050241, ENSMUSG00000045322,<br>ENSMUSG00000030413, ENSMUSG00000030124,<br>ENSMUSG00000055994, ENSMUSG00000030149,<br>ENSMUSG00000029377, ENSMUSG00000024349,<br>ENSMUSG00000026573, ENSMUSG00000044583,<br>ENSMUSG00000051498, ENSMUSG00000004296,<br>ENSMUSG00000025473, ENSMUSG00000022901                                                                                                                                                                                                                                                | 1 | 2 | ENSMUSG00000043496, ENSMUSG00000032076 |
| GO:0001910 | regulation of leukocyte<br>mediated cytotoxicity | 3.68E-09 | 16 | ENSMUSG0000005696, ENSMUSG00000060802,<br>ENSMUSG00000030149, ENSMUSG00000026573,<br>ENSMUSG00000061232, ENSMUSG00000073406,<br>ENSMUSG00000004296, ENSMUSG00000073411,                                                                                                                                                                                                                                                                                                                                                                                                                           | 1 | 2 | ENSMUSG00000090877, ENSMUSG00000032076 |

|            |         |          |    |                                                                                                                                                                                                                                                                                                                                                                                                                                                                                                                                                                                                                                                                                                                                                                                                                                                                                                                                                                                |   |   |                                                                                                                                                      |
|------------|---------|----------|----|--------------------------------------------------------------------------------------------------------------------------------------------------------------------------------------------------------------------------------------------------------------------------------------------------------------------------------------------------------------------------------------------------------------------------------------------------------------------------------------------------------------------------------------------------------------------------------------------------------------------------------------------------------------------------------------------------------------------------------------------------------------------------------------------------------------------------------------------------------------------------------------------------------------------------------------------------------------------------------|---|---|------------------------------------------------------------------------------------------------------------------------------------------------------|
|            |         |          |    | ENSMUSG00000050241, ENSMUSG00000029371,<br>ENSMUSG00000030124, ENSMUSG00000079620,<br>ENSMUSG00000079298, ENSMUSG00000024339,<br>ENSMUSG00000037321, ENSMUSG00000067212                                                                                                                                                                                                                                                                                                                                                                                                                                                                                                                                                                                                                                                                                                                                                                                                        |   |   |                                                                                                                                                      |
| GO:0000279 | M phase | 3.61E-17 | 58 | ENSMUSG00000017716, ENSMUSG00000015880,<br>ENSMUSG00000024791, ENSMUSG00000050107,<br>ENSMUSG00000045273, ENSMUSG00000024989,<br>ENSMUSG00000029377, ENSMUSG00000026605,<br>ENSMUSG00000068744, ENSMUSG00000019942,<br>ENSMUSG00000045328, ENSMUSG00000006398,<br>ENSMUSG00000031004, ENSMUSG00000028873,<br>ENSMUSG00000002055, ENSMUSG00000033644,<br>ENSMUSG00000027379, ENSMUSG00000024056,<br>ENSMUSG00000027469, ENSMUSG00000027331,<br>ENSMUSG00000027715, ENSMUSG00000036912,<br>ENSMUSG00000029414, ENSMUSG00000044201,<br>ENSMUSG00000026683, ENSMUSG00000023505,<br>ENSMUSG00000050957, ENSMUSG00000039748,<br>ENSMUSG00000026039, ENSMUSG00000041431,<br>ENSMUSG00000040084, ENSMUSG00000036223,<br>ENSMUSG00000027306, ENSMUSG00000037313,<br>ENSMUSG00000024795, ENSMUSG00000023015,<br>ENSMUSG00000069910, ENSMUSG00000025001,<br>ENSMUSG00000048922, ENSMUSG00000051378,<br>ENSMUSG00000020897, ENSMUSG00000031898,<br>ENSMUSG00000017499, ENSMUSG00000071350, | 1 | 7 | ENSMUSG00000007815, ENSMUSG00000025862,<br>ENSMUSG00000001403, ENSMUSG00000062380,<br>ENSMUSG00000071470, ENSMUSG00000031176,<br>ENSMUSG000000036782 |



|            |                                       |          |    |                                                                                                                                                                                                                                                                                                                                                                                                                                                                                                                                                                                                                                                                                                             |   |   |                                        |
|------------|---------------------------------------|----------|----|-------------------------------------------------------------------------------------------------------------------------------------------------------------------------------------------------------------------------------------------------------------------------------------------------------------------------------------------------------------------------------------------------------------------------------------------------------------------------------------------------------------------------------------------------------------------------------------------------------------------------------------------------------------------------------------------------------------|---|---|----------------------------------------|
|            |                                       |          |    | ENSMUSG00000020415, ENSMUSG00000037544,<br>ENSMUSG00000028678, ENSMUSG00000030867,<br>ENSMUSG00000012443, ENSMUSG00000074476,<br>ENSMUSG00000017861, ENSMUSG00000023940,<br>ENSMUSG00000072082, ENSMUSG00000026779,<br>ENSMUSG00000033952, ENSMUSG00000058290,<br>ENSMUSG00000032218, ENSMUSG00000027496                                                                                                                                                                                                                                                                                                                                                                                                    |   |   |                                        |
| GO:0046649 | lymphocyte activation                 | 1.24E-05 | 32 | ENSMUSG00000060802, ENSMUSG00000074148,<br>ENSMUSG00000071005, ENSMUSG00000071068,<br>ENSMUSG00000018899, ENSMUSG00000053977,<br>ENSMUSG00000028072, ENSMUSG00000062007,<br>ENSMUSG00000030786, ENSMUSG00000059089,<br>ENSMUSG00000028362, ENSMUSG00000068227,<br>ENSMUSG00000055170, ENSMUSG00000001444,<br>ENSMUSG00000027843, ENSMUSG00000040751,<br>ENSMUSG00000039748, ENSMUSG00000030525,<br>ENSMUSG00000030149, ENSMUSG00000040627,<br>ENSMUSG00000026573, ENSMUSG00000004296,<br>ENSMUSG00000053175, ENSMUSG00000025001,<br>ENSMUSG00000022901, ENSMUSG00000050241,<br>ENSMUSG00000029075, ENSMUSG00000034116,<br>ENSMUSG00000038418, ENSMUSG00000025746,<br>ENSMUSG00000049109, ENSMUSG00000026177 | 1 | 2 | ENSMUSG00000061311, ENSMUSG00000017697 |
| GO:0042129 | regulation of T cell<br>proliferation | 1.91E-05 | 19 | ENSMUSG00000016496, ENSMUSG00000044701,<br>ENSMUSG00000055170, ENSMUSG00000035042,<br>ENSMUSG00000026573, ENSMUSG00000049103,                                                                                                                                                                                                                                                                                                                                                                                                                                                                                                                                                                               | 1 | 2 | ENSMUSG00000024653, ENSMUSG00000026532 |

|            |                                                |                 |    |                                                                                                                                                                                                                                                                                                                                                                                                                                                                                                                                                                                                                                                                                                                                                                                                                                               |   |    |                                                                                                                                                                                                                                                                                                                                                                                                                                                                                                                                                                                                                                                                                         |
|------------|------------------------------------------------|-----------------|----|-----------------------------------------------------------------------------------------------------------------------------------------------------------------------------------------------------------------------------------------------------------------------------------------------------------------------------------------------------------------------------------------------------------------------------------------------------------------------------------------------------------------------------------------------------------------------------------------------------------------------------------------------------------------------------------------------------------------------------------------------------------------------------------------------------------------------------------------------|---|----|-----------------------------------------------------------------------------------------------------------------------------------------------------------------------------------------------------------------------------------------------------------------------------------------------------------------------------------------------------------------------------------------------------------------------------------------------------------------------------------------------------------------------------------------------------------------------------------------------------------------------------------------------------------------------------------------|
|            |                                                |                 |    | ENSMUSG0000004296, ENSMUSG00000000791,<br>ENSMUSG00000022901, ENSMUSG00000075122,<br>ENSMUSG00000016498, ENSMUSG00000030365,<br>ENSMUSG00000024397, ENSMUSG00000026011,<br>ENSMUSG00000025746, ENSMUSG00000020053,<br>ENSMUSG00000027398, ENSMUSG00000031551,<br>ENSMUSG00000026770                                                                                                                                                                                                                                                                                                                                                                                                                                                                                                                                                           |   |    |                                                                                                                                                                                                                                                                                                                                                                                                                                                                                                                                                                                                                                                                                         |
| GO:0048585 | negative regulation of<br>response to stimulus | 0.00259298<br>7 | 51 | ENSMUSG00000036931, ENSMUSG00000074151,<br>ENSMUSG00000046845, ENSMUSG00000049103,<br>ENSMUSG00000018899, ENSMUSG00000024696,<br>ENSMUSG00000016529, ENSMUSG00000073406,<br>ENSMUSG00000035385, ENSMUSG00000004952,<br>ENSMUSG00000026011, ENSMUSG00000025804,<br>ENSMUSG00000020053, ENSMUSG00000027398,<br>ENSMUSG00000037321, ENSMUSG00000035365,<br>ENSMUSG00000034459, ENSMUSG00000030921,<br>ENSMUSG00000026770, ENSMUSG00000029005,<br>ENSMUSG00000038037, ENSMUSG00000045322,<br>ENSMUSG00000026104, ENSMUSG00000027368,<br>ENSMUSG00000027843, ENSMUSG00000022548,<br>ENSMUSG00000055994, ENSMUSG00000035042,<br>ENSMUSG00000030525, ENSMUSG00000026573,<br>ENSMUSG00000021322, ENSMUSG00000026475,<br>ENSMUSG00000004296, ENSMUSG00000026981,<br>ENSMUSG00000026656, ENSMUSG00000050241,<br>ENSMUSG00000034394, ENSMUSG00000079298, | 1 | 31 | ENSMUSG00000042812, ENSMUSG00000025810,<br>ENSMUSG00000032547, ENSMUSG00000055653,<br>ENSMUSG00000059201, ENSMUSG00000022868,<br>ENSMUSG00000046818, ENSMUSG00000025889,<br>ENSMUSG00000055980, ENSMUSG00000026984,<br>ENSMUSG00000032558, ENSMUSG00000026715,<br>ENSMUSG00000007815, ENSMUSG00000039952,<br>ENSMUSG00000021319, ENSMUSG00000001494,<br>ENSMUSG00000026983, ENSMUSG00000024028,<br>ENSMUSG00000026874, ENSMUSG00000021055,<br>ENSMUSG00000059495, ENSMUSG00000020889,<br>ENSMUSG00000032422, ENSMUSG00000032216,<br>ENSMUSG00000017697, ENSMUSG00000036867,<br>ENSMUSG00000054196, ENSMUSG00000031980,<br>ENSMUSG00000040289, ENSMUSG00000022878,<br>ENSMUSG00000010047 |

|            |                                              |          |     |                                                                                                                                                                                                                                                                                                                                                                                                                                                                                                                                                                                                                                                                                                                                                                                                                                               |   |     |                                                                                                                                                                                                                                                                                                                                                                                                                                                                                                                                                                                                                                                                                                                                                                                                                                               |
|------------|----------------------------------------------|----------|-----|-----------------------------------------------------------------------------------------------------------------------------------------------------------------------------------------------------------------------------------------------------------------------------------------------------------------------------------------------------------------------------------------------------------------------------------------------------------------------------------------------------------------------------------------------------------------------------------------------------------------------------------------------------------------------------------------------------------------------------------------------------------------------------------------------------------------------------------------------|---|-----|-----------------------------------------------------------------------------------------------------------------------------------------------------------------------------------------------------------------------------------------------------------------------------------------------------------------------------------------------------------------------------------------------------------------------------------------------------------------------------------------------------------------------------------------------------------------------------------------------------------------------------------------------------------------------------------------------------------------------------------------------------------------------------------------------------------------------------------------------|
|            |                                              |          |     | ENSMUSG00000079620, ENSMUSG00000026358,<br>ENSMUSG00000039519, ENSMUSG00000021765,<br>ENSMUSG00000038418, ENSMUSG00000022876,<br>ENSMUSG00000024339, ENSMUSG00000048806,<br>ENSMUSG00000042345, ENSMUSG00000042726,<br>ENSMUSG00000078817, ENSMUSG00000030111,<br>ENSMUSG00000053113                                                                                                                                                                                                                                                                                                                                                                                                                                                                                                                                                          |   |     |                                                                                                                                                                                                                                                                                                                                                                                                                                                                                                                                                                                                                                                                                                                                                                                                                                               |
| GO:0048518 | positive regulation of<br>biological process | 1.40E-11 | 199 | ENSMUSG00000017716, ENSMUSG00000033538,<br>ENSMUSG00000036931, ENSMUSG00000027995,<br>ENSMUSG00000036887, ENSMUSG00000027699,<br>ENSMUSG00000049103, ENSMUSG00000061232,<br>ENSMUSG00000053977, ENSMUSG00000075404,<br>ENSMUSG00000019942, ENSMUSG00000022831,<br>ENSMUSG00000020848, ENSMUSG00000000817,<br>ENSMUSG00000033644, ENSMUSG00000022504,<br>ENSMUSG00000001123, ENSMUSG00000028071,<br>ENSMUSG00000040296, ENSMUSG00000000247,<br>ENSMUSG00000020053, ENSMUSG00000037321,<br>ENSMUSG00000027715, ENSMUSG00000031551,<br>ENSMUSG00000025473, ENSMUSG00000030142,<br>ENSMUSG00000045322, ENSMUSG00000001444,<br>ENSMUSG00000002992, ENSMUSG00000055994,<br>ENSMUSG00000024353, ENSMUSG00000001228,<br>ENSMUSG00000030149, ENSMUSG00000041431,<br>ENSMUSG00000000982, ENSMUSG00000029304,<br>ENSMUSG00000038067, ENSMUSG00000053175, | 1 | 135 | ENSMUSG00000039956, ENSMUSG00000021506,<br>ENSMUSG00000030302, ENSMUSG00000032547,<br>ENSMUSG00000025889, ENSMUSG00000046532,<br>ENSMUSG00000054422, ENSMUSG00000023328,<br>ENSMUSG00000090877, ENSMUSG00000002588,<br>ENSMUSG00000037188, ENSMUSG00000090639,<br>ENSMUSG00000061393, ENSMUSG00000071317,<br>ENSMUSG00000033208, ENSMUSG00000034910,<br>ENSMUSG00000029195, ENSMUSG00000043496,<br>ENSMUSG00000010051, ENSMUSG00000017697,<br>ENSMUSG00000036867, ENSMUSG00000049641,<br>ENSMUSG00000037010, ENSMUSG00000051234,<br>ENSMUSG00000032076, ENSMUSG00000008035,<br>ENSMUSG00000024027, ENSMUSG00000042812,<br>ENSMUSG00000034584, ENSMUSG00000022868,<br>ENSMUSG00000027470, ENSMUSG00000035486,<br>ENSMUSG00000041624, ENSMUSG00000032315,<br>ENSMUSG00000059327, ENSMUSG00000032491,<br>ENSMUSG00000023013, ENSMUSG00000032083, |

|  |  |  |                                                                                                                                                                                                                                                                                                                                                                                                                                                                                                                                                                                                                                                                                                                                                                                                                                                                                                                                                                                                                                                                                                                                                         |  |                                                                                                                                                                                                                                                                                                                                                                                                                                                                                                                                                                                                                                                                                                                                                                                                                                                                                                                                                                                                                                                                                                                                                          |
|--|--|--|---------------------------------------------------------------------------------------------------------------------------------------------------------------------------------------------------------------------------------------------------------------------------------------------------------------------------------------------------------------------------------------------------------------------------------------------------------------------------------------------------------------------------------------------------------------------------------------------------------------------------------------------------------------------------------------------------------------------------------------------------------------------------------------------------------------------------------------------------------------------------------------------------------------------------------------------------------------------------------------------------------------------------------------------------------------------------------------------------------------------------------------------------------|--|----------------------------------------------------------------------------------------------------------------------------------------------------------------------------------------------------------------------------------------------------------------------------------------------------------------------------------------------------------------------------------------------------------------------------------------------------------------------------------------------------------------------------------------------------------------------------------------------------------------------------------------------------------------------------------------------------------------------------------------------------------------------------------------------------------------------------------------------------------------------------------------------------------------------------------------------------------------------------------------------------------------------------------------------------------------------------------------------------------------------------------------------------------|
|  |  |  | ENSMUSG0000002307, ENSMUSG00000026656,<br>ENSMUSG00000023913, ENSMUSG00000020897,<br>ENSMUSG00000029075, ENSMUSG00000030124,<br>ENSMUSG00000017499, ENSMUSG00000026582,<br>ENSMUSG00000028068, ENSMUSG00000022221,<br>ENSMUSG00000038418, ENSMUSG00000024079,<br>ENSMUSG00000074151, ENSMUSG00000040613,<br>ENSMUSG00000036905, ENSMUSG00000026822,<br>ENSMUSG00000071005, ENSMUSG00000038209,<br>ENSMUSG00000047517, ENSMUSG00000029377,<br>ENSMUSG00000051439, ENSMUSG00000032691,<br>ENSMUSG00000045328, ENSMUSG00000030413,<br>ENSMUSG00000062007, ENSMUSG00000037725,<br>ENSMUSG00000027398, ENSMUSG00000034459,<br>ENSMUSG00000028362, ENSMUSG00000055170,<br>ENSMUSG00000068227, ENSMUSG00000027843,<br>ENSMUSG00000022838, ENSMUSG00000035042,<br>ENSMUSG00000035186, ENSMUSG00000058715,<br>ENSMUSG0000003555, ENSMUSG00000090125,<br>ENSMUSG0000004296, ENSMUSG00000023015,<br>ENSMUSG00000000791, ENSMUSG00000015947,<br>ENSMUSG00000023078, ENSMUSG00000041515,<br>ENSMUSG00000037440, ENSMUSG00000034394,<br>ENSMUSG00000039519, ENSMUSG00000036986,<br>ENSMUSG00000024401, ENSMUSG00000074622,<br>ENSMUSG00000090231, ENSMUSG00000026580, |  | ENSMUSG00000059481, ENSMUSG00000042903,<br>ENSMUSG00000054196, ENSMUSG00000031997,<br>ENSMUSG00000031980, ENSMUSG00000040412,<br>ENSMUSG00000031380, ENSMUSG00000030730,<br>ENSMUSG00000032380, ENSMUSG00000046714,<br>ENSMUSG00000031841, ENSMUSG00000032554,<br>ENSMUSG00000033577, ENSMUSG00000021319,<br>ENSMUSG00000031320, ENSMUSG00000024972,<br>ENSMUSG00000041688, ENSMUSG0000005705,<br>ENSMUSG00000022996, ENSMUSG00000074336,<br>ENSMUSG00000032216, ENSMUSG00000020623,<br>ENSMUSG00000001403, ENSMUSG00000029361,<br>ENSMUSG00000038119, ENSMUSG00000019326,<br>ENSMUSG0000005373, ENSMUSG00000025386,<br>ENSMUSG00000000889, ENSMUSG00000021573,<br>ENSMUSG00000062778, ENSMUSG00000058914,<br>ENSMUSG00000020052, ENSMUSG00000010047,<br>ENSMUSG00000020123, ENSMUSG00000009471,<br>ENSMUSG00000017204, ENSMUSG00000031495,<br>ENSMUSG00000062515, ENSMUSG00000032511,<br>ENSMUSG00000020524, ENSMUSG00000044820,<br>ENSMUSG00000026874, ENSMUSG00000039004,<br>ENSMUSG00000031253, ENSMUSG00000019102,<br>ENSMUSG00000031760, ENSMUSG00000032839,<br>ENSMUSG00000037071, ENSMUSG00000044405,<br>ENSMUSG00000026459, ENSMUSG00000029193, |
|--|--|--|---------------------------------------------------------------------------------------------------------------------------------------------------------------------------------------------------------------------------------------------------------------------------------------------------------------------------------------------------------------------------------------------------------------------------------------------------------------------------------------------------------------------------------------------------------------------------------------------------------------------------------------------------------------------------------------------------------------------------------------------------------------------------------------------------------------------------------------------------------------------------------------------------------------------------------------------------------------------------------------------------------------------------------------------------------------------------------------------------------------------------------------------------------|--|----------------------------------------------------------------------------------------------------------------------------------------------------------------------------------------------------------------------------------------------------------------------------------------------------------------------------------------------------------------------------------------------------------------------------------------------------------------------------------------------------------------------------------------------------------------------------------------------------------------------------------------------------------------------------------------------------------------------------------------------------------------------------------------------------------------------------------------------------------------------------------------------------------------------------------------------------------------------------------------------------------------------------------------------------------------------------------------------------------------------------------------------------------|

|  |  |  |                                                                                                                                                                                                                                                                                                                                                                                                                                                                                                                                                                                                                                                                                                                                                                                                                                                                                                                                                                                                                                                                                                                                                         |  |                                                                                                                                                                                                                                                                                                                                                                                                                                                                                                                                                                                                                                                                                                                                                                                                                                                                                                                                                                                                    |
|--|--|--|---------------------------------------------------------------------------------------------------------------------------------------------------------------------------------------------------------------------------------------------------------------------------------------------------------------------------------------------------------------------------------------------------------------------------------------------------------------------------------------------------------------------------------------------------------------------------------------------------------------------------------------------------------------------------------------------------------------------------------------------------------------------------------------------------------------------------------------------------------------------------------------------------------------------------------------------------------------------------------------------------------------------------------------------------------------------------------------------------------------------------------------------------------|--|----------------------------------------------------------------------------------------------------------------------------------------------------------------------------------------------------------------------------------------------------------------------------------------------------------------------------------------------------------------------------------------------------------------------------------------------------------------------------------------------------------------------------------------------------------------------------------------------------------------------------------------------------------------------------------------------------------------------------------------------------------------------------------------------------------------------------------------------------------------------------------------------------------------------------------------------------------------------------------------------------|
|  |  |  | ENSMUSG00000025746, ENSMUSG00000037868,<br>ENSMUSG00000040658, ENSMUSG00000053113,<br>ENSMUSG00000049109, ENSMUSG00000004328,<br>ENSMUSG00000025165, ENSMUSG00000066513,<br>ENSMUSG00000060802, ENSMUSG00000058755,<br>ENSMUSG00000024112, ENSMUSG00000026628,<br>ENSMUSG0000006930, ENSMUSG00000018899,<br>ENSMUSG00000016529, ENSMUSG00000015437,<br>ENSMUSG00000045232, ENSMUSG00000017724,<br>ENSMUSG00000068744, ENSMUSG00000006398,<br>ENSMUSG00000028072, ENSMUSG00000018930,<br>ENSMUSG00000021714, ENSMUSG00000070034,<br>ENSMUSG00000026222, ENSMUSG00000025804,<br>ENSMUSG00000034652, ENSMUSG00000046718,<br>ENSMUSG00000051498, ENSMUSG00000030895,<br>ENSMUSG00000044811, ENSMUSG00000000182,<br>ENSMUSG00000034855, ENSMUSG00000030921,<br>ENSMUSG00000079019, ENSMUSG00000026770,<br>ENSMUSG00000033470, ENSMUSG00000044701,<br>ENSMUSG0000005696, ENSMUSG00000018920,<br>ENSMUSG00000040751, ENSMUSG00000070691,<br>ENSMUSG00000030525, ENSMUSG00000040552,<br>ENSMUSG00000040627, ENSMUSG00000035373,<br>ENSMUSG00000024371, ENSMUSG00000027306,<br>ENSMUSG00000038357, ENSMUSG00000055172,<br>ENSMUSG00000025498, ENSMUSG0000002068, |  | ENSMUSG00000040289, ENSMUSG00000022878,<br>ENSMUSG00000013076, ENSMUSG00000025860,<br>ENSMUSG00000059201, ENSMUSG00000030278,<br>ENSMUSG00000027077, ENSMUSG00000001494,<br>ENSMUSG00000079434, ENSMUSG00000034563,<br>ENSMUSG00000000049, ENSMUSG00000050164,<br>ENSMUSG00000024990, ENSMUSG00000049281,<br>ENSMUSG00000031425, ENSMUSG00000031134,<br>ENSMUSG00000027796, ENSMUSG00000025810,<br>ENSMUSG00000029368, ENSMUSG00000032366,<br>ENSMUSG00000055980, ENSMUSG00000024500,<br>ENSMUSG00000040147, ENSMUSG00000061780,<br>ENSMUSG00000029236, ENSMUSG00000032010,<br>ENSMUSG00000024028, ENSMUSG00000021055,<br>ENSMUSG00000020427, ENSMUSG00000031489,<br>ENSMUSG00000048142, ENSMUSG00000032064,<br>ENSMUSG00000063632, ENSMUSG00000046834,<br>ENSMUSG00000073465, ENSMUSG00000026532,<br>ENSMUSG00000050071, ENSMUSG00000055653,<br>ENSMUSG00000032570, ENSMUSG00000032911,<br>ENSMUSG00000059824, ENSMUSG0000005355,<br>ENSMUSG0000007815, ENSMUSG00000025991,<br>ENSMUSG00000031097 |
|--|--|--|---------------------------------------------------------------------------------------------------------------------------------------------------------------------------------------------------------------------------------------------------------------------------------------------------------------------------------------------------------------------------------------------------------------------------------------------------------------------------------------------------------------------------------------------------------------------------------------------------------------------------------------------------------------------------------------------------------------------------------------------------------------------------------------------------------------------------------------------------------------------------------------------------------------------------------------------------------------------------------------------------------------------------------------------------------------------------------------------------------------------------------------------------------|--|----------------------------------------------------------------------------------------------------------------------------------------------------------------------------------------------------------------------------------------------------------------------------------------------------------------------------------------------------------------------------------------------------------------------------------------------------------------------------------------------------------------------------------------------------------------------------------------------------------------------------------------------------------------------------------------------------------------------------------------------------------------------------------------------------------------------------------------------------------------------------------------------------------------------------------------------------------------------------------------------------|

|  |  |  |  |                                                                                                                                                                                                                                                                                                                                                                                                                                                                                                                                                                                                                                                                                                                                                                                                                                                                                                                                                                                                                                                                                                                                                           |  |  |  |
|--|--|--|--|-----------------------------------------------------------------------------------------------------------------------------------------------------------------------------------------------------------------------------------------------------------------------------------------------------------------------------------------------------------------------------------------------------------------------------------------------------------------------------------------------------------------------------------------------------------------------------------------------------------------------------------------------------------------------------------------------------------------------------------------------------------------------------------------------------------------------------------------------------------------------------------------------------------------------------------------------------------------------------------------------------------------------------------------------------------------------------------------------------------------------------------------------------------|--|--|--|
|  |  |  |  | ENSMUSG00000050241, ENSMUSG00000030793,<br>ENSMUSG0000003283, ENSMUSG00000078236,<br>ENSMUSG00000030867, ENSMUSG00000016498,<br>ENSMUSG00000044138, ENSMUSG00000022622,<br>ENSMUSG00000024397, ENSMUSG00000048806,<br>ENSMUSG00000044583, ENSMUSG00000029380,<br>ENSMUSG00000078817, ENSMUSG00000033952,<br>ENSMUSG00000021451, ENSMUSG00000027832,<br>ENSMUSG00000025044, ENSMUSG00000074148,<br>ENSMUSG00000031444, ENSMUSG00000074115,<br>ENSMUSG00000029378, ENSMUSG00000035385,<br>ENSMUSG00000073411, ENSMUSG00000023132,<br>ENSMUSG00000017146, ENSMUSG00000075122,<br>ENSMUSG00000028874, ENSMUSG00000029915,<br>ENSMUSG00000073489, ENSMUSG00000030365,<br>ENSMUSG00000026011, ENSMUSG00000079227,<br>ENSMUSG00000049608, ENSMUSG00000035683,<br>ENSMUSG00000041324, ENSMUSG00000067212,<br>ENSMUSG00000024014, ENSMUSG00000057135,<br>ENSMUSG00000028602, ENSMUSG00000026104,<br>ENSMUSG00000092005, ENSMUSG00000071552,<br>ENSMUSG00000024349, ENSMUSG00000026573,<br>ENSMUSG00000020310, ENSMUSG00000024798,<br>ENSMUSG00000022901, ENSMUSG00000021886,<br>ENSMUSG00000045471, ENSMUSG00000044827,<br>ENSMUSG00000034116, ENSMUSG00000021765, |  |  |  |
|--|--|--|--|-----------------------------------------------------------------------------------------------------------------------------------------------------------------------------------------------------------------------------------------------------------------------------------------------------------------------------------------------------------------------------------------------------------------------------------------------------------------------------------------------------------------------------------------------------------------------------------------------------------------------------------------------------------------------------------------------------------------------------------------------------------------------------------------------------------------------------------------------------------------------------------------------------------------------------------------------------------------------------------------------------------------------------------------------------------------------------------------------------------------------------------------------------------|--|--|--|

|            |                                                          |                 |    |                                                                                                                                                                                                                                                                                                                                                                                                                                                                                                                                                                                                                                                                                                                                                                                                                                                                                          |   |    |                                                                                                                                                                                                                                                                                                                                                                                                                                                                                                                                                                                                                                                                                                                                                                                                                                                                                          |
|------------|----------------------------------------------------------|-----------------|----|------------------------------------------------------------------------------------------------------------------------------------------------------------------------------------------------------------------------------------------------------------------------------------------------------------------------------------------------------------------------------------------------------------------------------------------------------------------------------------------------------------------------------------------------------------------------------------------------------------------------------------------------------------------------------------------------------------------------------------------------------------------------------------------------------------------------------------------------------------------------------------------|---|----|------------------------------------------------------------------------------------------------------------------------------------------------------------------------------------------------------------------------------------------------------------------------------------------------------------------------------------------------------------------------------------------------------------------------------------------------------------------------------------------------------------------------------------------------------------------------------------------------------------------------------------------------------------------------------------------------------------------------------------------------------------------------------------------------------------------------------------------------------------------------------------------|
|            |                                                          |                 |    | ENSMUSG00000024339, ENSMUSG00000020649,<br>ENSMUSG00000041347, ENSMUSG00000026177,<br>ENSMUSG00000054136                                                                                                                                                                                                                                                                                                                                                                                                                                                                                                                                                                                                                                                                                                                                                                                 |   |    |                                                                                                                                                                                                                                                                                                                                                                                                                                                                                                                                                                                                                                                                                                                                                                                                                                                                                          |
| GO:2000503 | positive regulation of natural<br>killer cell chemotaxis | 0.00017833      | 5  | ENSMUSG00000026573, ENSMUSG00000035373,<br>ENSMUSG00000018930, ENSMUSG0000000982,<br>ENSMUSG00000035042                                                                                                                                                                                                                                                                                                                                                                                                                                                                                                                                                                                                                                                                                                                                                                                  | 1 | 0  |                                                                                                                                                                                                                                                                                                                                                                                                                                                                                                                                                                                                                                                                                                                                                                                                                                                                                          |
| GO:0051246 | regulation of protein<br>metabolic process               | 0.00193014<br>5 | 80 | ENSMUSG00000058755, ENSMUSG00000027995,<br>ENSMUSG00000066363, ENSMUSG00000021403,<br>ENSMUSG00000041481, ENSMUSG00000027699,<br>ENSMUSG00000049103, ENSMUSG00000018899,<br>ENSMUSG00000016529, ENSMUSG00000028613,<br>ENSMUSG00000006398, ENSMUSG00000022831,<br>ENSMUSG00000058207, ENSMUSG00000033644,<br>ENSMUSG00000061947, ENSMUSG00000020053,<br>ENSMUSG00000030895, ENSMUSG00000051498,<br>ENSMUSG00000021091, ENSMUSG00000027715,<br>ENSMUSG00000030921, ENSMUSG00000036912,<br>ENSMUSG00000042489, ENSMUSG00000025473,<br>ENSMUSG00000044701, ENSMUSG00000038037,<br>ENSMUSG00000045322, ENSMUSG00000027368,<br>ENSMUSG00000055994, ENSMUSG00000022548,<br>ENSMUSG00000001228, ENSMUSG00000030525,<br>ENSMUSG00000041431, ENSMUSG00000038357,<br>ENSMUSG00000002307, ENSMUSG00000053175,<br>ENSMUSG00000041536, ENSMUSG00000002068,<br>ENSMUSG00000029075, ENSMUSG00000001131, | 1 | 46 | ENSMUSG00000025810, ENSMUSG00000033327,<br>ENSMUSG00000040488, ENSMUSG00000025889,<br>ENSMUSG00000062515, ENSMUSG00000026715,<br>ENSMUSG00000001865, ENSMUSG00000090639,<br>ENSMUSG00000032554, ENSMUSG00000031320,<br>ENSMUSG00000061393, ENSMUSG00000039004,<br>ENSMUSG00000033208, ENSMUSG00000031996,<br>ENSMUSG00000089865, ENSMUSG00000020427,<br>ENSMUSG00000022996, ENSMUSG00000031760,<br>ENSMUSG00000058260, ENSMUSG00000055561,<br>ENSMUSG00000032216, ENSMUSG00000073601,<br>ENSMUSG00000020623, ENSMUSG00000036867,<br>ENSMUSG00000029361, ENSMUSG00000073465,<br>ENSMUSG00000038119, ENSMUSG00000022878,<br>ENSMUSG00000055653, ENSMUSG00000059201,<br>ENSMUSG00000022868, ENSMUSG00000005373,<br>ENSMUSG00000032911, ENSMUSG00000024039,<br>ENSMUSG00000073602, ENSMUSG00000044594,<br>ENSMUSG00000025386, ENSMUSG00000061068,<br>ENSMUSG00000058017, ENSMUSG00000052305, |

|            |                                              |                 |   |                                                                                                                                                                                                                                                                                                                                                                                                                                                                                                                                                                                                                                                                                                                                                                                                                                                                                                                                      |   |   |                                                                                                                                         |
|------------|----------------------------------------------|-----------------|---|--------------------------------------------------------------------------------------------------------------------------------------------------------------------------------------------------------------------------------------------------------------------------------------------------------------------------------------------------------------------------------------------------------------------------------------------------------------------------------------------------------------------------------------------------------------------------------------------------------------------------------------------------------------------------------------------------------------------------------------------------------------------------------------------------------------------------------------------------------------------------------------------------------------------------------------|---|---|-----------------------------------------------------------------------------------------------------------------------------------------|
|            |                                              |                 |   | <p>ENSMUSG00000030124, ENSMUSG00000030867,<br/> ENSMUSG00000028068, ENSMUSG00000024397,<br/> ENSMUSG00000022876, ENSMUSG00000038418,<br/> ENSMUSG00000044583, ENSMUSG00000078817,<br/> ENSMUSG00000021451, ENSMUSG00000071005,<br/> ENSMUSG00000038209, ENSMUSG00000029377,<br/> ENSMUSG00000045328, ENSMUSG00000075122,<br/> ENSMUSG00000017146, ENSMUSG00000028874,<br/> ENSMUSG00000030365, ENSMUSG00000027469,<br/> ENSMUSG00000066364, ENSMUSG00000027398,<br/> ENSMUSG00000024014, ENSMUSG00000055170,<br/> ENSMUSG00000028602, ENSMUSG00000035042,<br/> ENSMUSG00000004296, ENSMUSG00000026981,<br/> ENSMUSG00000018486, ENSMUSG00000044827,<br/> ENSMUSG00000045471, ENSMUSG00000034394,<br/> ENSMUSG00000079012, ENSMUSG00000036986,<br/> ENSMUSG00000024401, ENSMUSG00000025746,<br/> ENSMUSG00000041347, ENSMUSG00000030111,<br/> ENSMUSG00000053113, ENSMUSG00000066361,<br/> ENSMUSG00000026177, ENSMUSG00000032218</p> |   |   | <p>ENSMUSG00000059956, ENSMUSG00000067006,<br/> ENSMUSG00000026327, ENSMUSG00000032083,<br/> ENSMUSG00000031980, ENSMUSG00000010047</p> |
| GO:0050704 | regulation of interleukin-1 secretion        | 0.00214095<br>6 | 7 | <p>ENSMUSG00000055170, ENSMUSG00000030793,<br/> ENSMUSG00000000982, ENSMUSG00000079227,<br/> ENSMUSG00000055994, ENSMUSG00000078817,<br/> ENSMUSG00000032691</p>                                                                                                                                                                                                                                                                                                                                                                                                                                                                                                                                                                                                                                                                                                                                                                     | 1 | 0 |                                                                                                                                         |
| GO:0042346 | positive regulation of NF-kappaB import into | 0.00557237<br>3 | 7 | <p>ENSMUSG00000027995, ENSMUSG00000045322,<br/> ENSMUSG00000044583, ENSMUSG00000027398,</p>                                                                                                                                                                                                                                                                                                                                                                                                                                                                                                                                                                                                                                                                                                                                                                                                                                          | 1 | 0 |                                                                                                                                         |



|                           |                                                                         |                 |    |                                                                                                                                                                                                                                                                                                                                                      |   |    |                                                                                                                                                                                                                                                                                                                                                      |
|---------------------------|-------------------------------------------------------------------------|-----------------|----|------------------------------------------------------------------------------------------------------------------------------------------------------------------------------------------------------------------------------------------------------------------------------------------------------------------------------------------------------|---|----|------------------------------------------------------------------------------------------------------------------------------------------------------------------------------------------------------------------------------------------------------------------------------------------------------------------------------------------------------|
|                           | nucleus                                                                 |                 |    | ENSMUSG00000078817, ENSMUSG00000071005,<br>ENSMUSG00000024401                                                                                                                                                                                                                                                                                        |   |    |                                                                                                                                                                                                                                                                                                                                                      |
| GO:0002483                | antigen processing and<br>presentation of endogenous<br>peptide antigen | 0.00351362<br>7 | 5  | ENSMUSG00000073411, ENSMUSG00000024339,<br>ENSMUSG00000061232, ENSMUSG00000037321,<br>ENSMUSG00000067212                                                                                                                                                                                                                                             | 1 | 0  |                                                                                                                                                                                                                                                                                                                                                      |
| GO:0032655                | regulation of interleukin-12<br>production                              | 0.00012598      | 11 | ENSMUSG00000055170, ENSMUSG00000027995,<br>ENSMUSG00000045322, ENSMUSG00000041515,<br>ENSMUSG00000055994, ENSMUSG00000071552,<br>ENSMUSG00000051498, ENSMUSG00000018899,<br>ENSMUSG00000016529, ENSMUSG00000004296,<br>ENSMUSG00000031551                                                                                                            | 1 | 0  |                                                                                                                                                                                                                                                                                                                                                      |
| <b>Molecular Function</b> |                                                                         |                 |    |                                                                                                                                                                                                                                                                                                                                                      |   |    |                                                                                                                                                                                                                                                                                                                                                      |
| GO:<br>0004<br>896        | cytokine receptor activity                                              | 0.00749213<br>5 | 12 | ENSMUSG00000030745, ENSMUSG00000068227,<br>ENSMUSG00000050232, ENSMUSG00000026068,<br>ENSMUSG00000071714, ENSMUSG00000025804,<br>ENSMUSG00000049103, ENSMUSG00000079227,<br>ENSMUSG00000004296, ENSMUSG00000071713,<br>ENSMUSG00000026770, ENSMUSG00000026073                                                                                        | 1 | 3  | ENSMUSG00000006235, ENSMUSG00000041748,<br>ENSMUSG000000079355                                                                                                                                                                                                                                                                                       |
| GO:<br>0005<br>102        | receptor binding                                                        | 4.59E-05        | 77 | ENSMUSG00000066513, ENSMUSG00000058755,<br>ENSMUSG00000009185, ENSMUSG00000016529,<br>ENSMUSG00000045232, ENSMUSG00000028072,<br>ENSMUSG00000018930, ENSMUSG00000000817,<br>ENSMUSG00000078452, ENSMUSG00000020053,<br>ENSMUSG00000000182, ENSMUSG00000029816,<br>ENSMUSG00000037321, ENSMUSG00000034855,<br>ENSMUSG00000079019, ENSMUSG00000025473, | 1 | 61 | ENSMUSG00000031380, ENSMUSG00000039956,<br>ENSMUSG00000020123, ENSMUSG00000030302,<br>ENSMUSG00000032547, ENSMUSG00000049556,<br>ENSMUSG00000012705, ENSMUSG00000033831,<br>ENSMUSG00000031312, ENSMUSG00000055980,<br>ENSMUSG00000046532, ENSMUSG00000052911,<br>ENSMUSG00000029236, ENSMUSG00000020524,<br>ENSMUSG00000041012, ENSMUSG00000026983, |

|  |  |  |                                                                                                                                                                                                                                                                                                                                                                                                                                                                                                                                                                                                                                                                                                                                                                                                                                                                                                                                                                                                                                                                                                                                                            |  |                                                                                                                                                                                                                                                                                                                                                                                                                                                                                                                                                                                                                                                                                                                                                                                                                                                                                                                                                                                                    |
|--|--|--|------------------------------------------------------------------------------------------------------------------------------------------------------------------------------------------------------------------------------------------------------------------------------------------------------------------------------------------------------------------------------------------------------------------------------------------------------------------------------------------------------------------------------------------------------------------------------------------------------------------------------------------------------------------------------------------------------------------------------------------------------------------------------------------------------------------------------------------------------------------------------------------------------------------------------------------------------------------------------------------------------------------------------------------------------------------------------------------------------------------------------------------------------------|--|----------------------------------------------------------------------------------------------------------------------------------------------------------------------------------------------------------------------------------------------------------------------------------------------------------------------------------------------------------------------------------------------------------------------------------------------------------------------------------------------------------------------------------------------------------------------------------------------------------------------------------------------------------------------------------------------------------------------------------------------------------------------------------------------------------------------------------------------------------------------------------------------------------------------------------------------------------------------------------------------------|
|  |  |  | ENSMUSG00000044701, ENSMUSG00000038037,<br>ENSMUSG00000018920, ENSMUSG00000045322,<br>ENSMUSG00000050578, ENSMUSG00000030149,<br>ENSMUSG00000041431, ENSMUSG00000035373,<br>ENSMUSG00000000982, ENSMUSG00000029304,<br>ENSMUSG00000038067, ENSMUSG00000002307,<br>ENSMUSG00000030124, ENSMUSG00000079620,<br>ENSMUSG00000048806, ENSMUSG00000038580,<br>ENSMUSG00000038508, ENSMUSG00000029380,<br>ENSMUSG00000021451, ENSMUSG00000035352,<br>ENSMUSG00000058427, ENSMUSG00000060747,<br>ENSMUSG00000071005, ENSMUSG00000029379,<br>ENSMUSG00000029417, ENSMUSG00000061100,<br>ENSMUSG00000038209, ENSMUSG00000046845,<br>ENSMUSG00000029377, ENSMUSG00000074115,<br>ENSMUSG00000029378, ENSMUSG00000035385,<br>ENSMUSG00000026166, ENSMUSG00000030413,<br>ENSMUSG00000028874, ENSMUSG00000030365,<br>ENSMUSG00000027398, ENSMUSG00000030117,<br>ENSMUSG00000028362, ENSMUSG00000036469,<br>ENSMUSG00000041324, ENSMUSG00000055170,<br>ENSMUSG00000050957, ENSMUSG00000039899,<br>ENSMUSG00000026104, ENSMUSG00000035042,<br>ENSMUSG00000026573, ENSMUSG00000004296,<br>ENSMUSG00000026981, ENSMUSG00000022901,<br>ENSMUSG00000018486, ENSMUSG00000045471, |  | ENSMUSG00000024028, ENSMUSG00000052698,<br>ENSMUSG00000026874, ENSMUSG00000039004,<br>ENSMUSG00000033208, ENSMUSG00000031253,<br>ENSMUSG00000059495, ENSMUSG00000089865,<br>ENSMUSG0000005705, ENSMUSG00000022996,<br>ENSMUSG00000031489, ENSMUSG00000001300,<br>ENSMUSG00000032216, ENSMUSG00000036867,<br>ENSMUSG00000029019, ENSMUSG00000061808,<br>ENSMUSG00000037010, ENSMUSG00000032311,<br>ENSMUSG0000000881, ENSMUSG00000032076,<br>ENSMUSG00000022878, ENSMUSG00000059201,<br>ENSMUSG00000031214, ENSMUSG00000064057,<br>ENSMUSG00000026984, ENSMUSG00000041616,<br>ENSMUSG00000033544, ENSMUSG00000059327,<br>ENSMUSG00000032491, ENSMUSG00000019478,<br>ENSMUSG00000032377, ENSMUSG00000032081,<br>ENSMUSG00000045103, ENSMUSG00000032356,<br>ENSMUSG00000032083, ENSMUSG00000028989,<br>ENSMUSG00000031780, ENSMUSG00000054196,<br>ENSMUSG00000056978, ENSMUSG00000072966,<br>ENSMUSG00000023235, ENSMUSG00000025260,<br>ENSMUSG00000031980, ENSMUSG00000071347,<br>ENSMUSG00000010047 |
|--|--|--|------------------------------------------------------------------------------------------------------------------------------------------------------------------------------------------------------------------------------------------------------------------------------------------------------------------------------------------------------------------------------------------------------------------------------------------------------------------------------------------------------------------------------------------------------------------------------------------------------------------------------------------------------------------------------------------------------------------------------------------------------------------------------------------------------------------------------------------------------------------------------------------------------------------------------------------------------------------------------------------------------------------------------------------------------------------------------------------------------------------------------------------------------------|--|----------------------------------------------------------------------------------------------------------------------------------------------------------------------------------------------------------------------------------------------------------------------------------------------------------------------------------------------------------------------------------------------------------------------------------------------------------------------------------------------------------------------------------------------------------------------------------------------------------------------------------------------------------------------------------------------------------------------------------------------------------------------------------------------------------------------------------------------------------------------------------------------------------------------------------------------------------------------------------------------------|

|                    |                              |                 |     |                                                                                                                                                                                                                                                                                                                                                                                                                                                                                     |             |     |                                                                                                                                                                                                                                                                                                                                                                                                                                                                                                                                                                            |
|--------------------|------------------------------|-----------------|-----|-------------------------------------------------------------------------------------------------------------------------------------------------------------------------------------------------------------------------------------------------------------------------------------------------------------------------------------------------------------------------------------------------------------------------------------------------------------------------------------|-------------|-----|----------------------------------------------------------------------------------------------------------------------------------------------------------------------------------------------------------------------------------------------------------------------------------------------------------------------------------------------------------------------------------------------------------------------------------------------------------------------------------------------------------------------------------------------------------------------------|
|                    |                              |                 |     | ENSMUSG00000023078, ENSMUSG00000029371,<br>ENSMUSG00000034394, ENSMUSG00000024401,<br>ENSMUSG00000024339, ENSMUSG00000028971,<br>ENSMUSG00000025746, ENSMUSG00000038304,<br>ENSMUSG00000054136                                                                                                                                                                                                                                                                                      |             |     |                                                                                                                                                                                                                                                                                                                                                                                                                                                                                                                                                                            |
| GO:<br>0061<br>134 | peptidase regulator activity | 0.00664169<br>3 | 22  | ENSMUSG00000017716, ENSMUSG00000074148,<br>ENSMUSG00000029664, ENSMUSG00000066363,<br>ENSMUSG00000021403, ENSMUSG00000041481,<br>ENSMUSG00000059657, ENSMUSG00000068129,<br>ENSMUSG00000041536, ENSMUSG00000030793,<br>ENSMUSG00000023903, ENSMUSG0000001131,<br>ENSMUSG00000020415, ENSMUSG00000058207,<br>ENSMUSG00000079597, ENSMUSG00000079012,<br>ENSMUSG00000061947, ENSMUSG00000066364,<br>ENSMUSG00000021091, ENSMUSG00000030111,<br>ENSMUSG00000066361, ENSMUSG00000051949 | 0.000154069 | 26  | ENSMUSG00000025860, ENSMUSG00000055653,<br>ENSMUSG00000022868, ENSMUSG00000025889,<br>ENSMUSG00000073602, ENSMUSG00000026715,<br>ENSMUSG00000044594, ENSMUSG00000058017,<br>ENSMUSG00000039278, ENSMUSG00000026874,<br>ENSMUSG00000059956, ENSMUSG00000067006,<br>ENSMUSG00000023336, ENSMUSG00000031760,<br>ENSMUSG00000026327, ENSMUSG00000028356,<br>ENSMUSG00000030359, ENSMUSG00000058260,<br>ENSMUSG00000055561, ENSMUSG00000022871,<br>ENSMUSG00000019278, ENSMUSG00000070531,<br>ENSMUSG00000073601, ENSMUSG00000027442,<br>ENSMUSG00000031980, ENSMUSG00000015354 |
| GO:<br>0005<br>515 | protein binding              | 0.00011384<br>1 | 286 | ENSMUSG00000017716, ENSMUSG00000036931,<br>ENSMUSG00000035692, ENSMUSG00000031098,<br>ENSMUSG00000048534, ENSMUSG00000049103,<br>ENSMUSG00000028613, ENSMUSG00000053977,<br>ENSMUSG00000075404, ENSMUSG00000019942,<br>ENSMUSG00000030268, ENSMUSG00000020848,<br>ENSMUSG00000000817, ENSMUSG00000030786,<br>ENSMUSG00000040296, ENSMUSG00000020053,                                                                                                                                | 0.040426745 | 283 | ENSMUSG00000030302, ENSMUSG00000032263,<br>ENSMUSG00000074254, ENSMUSG00000025889,<br>ENSMUSG00000062270, ENSMUSG00000046532,<br>ENSMUSG00000023328, ENSMUSG00000027849,<br>ENSMUSG00000037188, ENSMUSG00000090639,<br>ENSMUSG00000061393, ENSMUSG00000021909,<br>ENSMUSG00000025172, ENSMUSG00000036551,<br>ENSMUSG00000033208, ENSMUSG00000049536,                                                                                                                                                                                                                       |

|  |  |  |                                                                                                                                                                                                                                                                                                                                                                                                                                                                                                                                                                                                                                                                                                                                                                                                                                                                                                                                                                                                                                                                                                                                                            |  |                                                                                                                                                                                                                                                                                                                                                                                                                                                                                                                                                                                                                                                                                                                                                                                                                                                                                                                                                                                                                                                                                                                                                            |
|--|--|--|------------------------------------------------------------------------------------------------------------------------------------------------------------------------------------------------------------------------------------------------------------------------------------------------------------------------------------------------------------------------------------------------------------------------------------------------------------------------------------------------------------------------------------------------------------------------------------------------------------------------------------------------------------------------------------------------------------------------------------------------------------------------------------------------------------------------------------------------------------------------------------------------------------------------------------------------------------------------------------------------------------------------------------------------------------------------------------------------------------------------------------------------------------|--|------------------------------------------------------------------------------------------------------------------------------------------------------------------------------------------------------------------------------------------------------------------------------------------------------------------------------------------------------------------------------------------------------------------------------------------------------------------------------------------------------------------------------------------------------------------------------------------------------------------------------------------------------------------------------------------------------------------------------------------------------------------------------------------------------------------------------------------------------------------------------------------------------------------------------------------------------------------------------------------------------------------------------------------------------------------------------------------------------------------------------------------------------------|
|  |  |  | ENSMUSG00000052160, ENSMUSG00000042489,<br>ENSMUSG00000025473, ENSMUSG00000038037,<br>ENSMUSG00000027368, ENSMUSG00000055994,<br>ENSMUSG00000000982, ENSMUSG00000039699,<br>ENSMUSG00000038067, ENSMUSG00000054520,<br>ENSMUSG00000029075, ENSMUSG00000028068,<br>ENSMUSG00000039315, ENSMUSG00000038418,<br>ENSMUSG00000026009, ENSMUSG00000027496,<br>ENSMUSG00000035352, ENSMUSG00000024663,<br>ENSMUSG00000060747, ENSMUSG00000037974,<br>ENSMUSG00000038209, ENSMUSG00000029377,<br>ENSMUSG00000047798, ENSMUSG00000045328,<br>ENSMUSG00000030413, ENSMUSG00000062007,<br>ENSMUSG00000047230, ENSMUSG00000028217,<br>ENSMUSG00000027398, ENSMUSG00000028362,<br>ENSMUSG00000016496, ENSMUSG00000044201,<br>ENSMUSG00000029005, ENSMUSG00000055170,<br>ENSMUSG00000035042, ENSMUSG00000035186,<br>ENSMUSG00000030077, ENSMUSG00000000791,<br>ENSMUSG00000026630, ENSMUSG00000018486,<br>ENSMUSG00000074896, ENSMUSG00000034394,<br>ENSMUSG00000079298, ENSMUSG00000024401,<br>ENSMUSG00000026580, ENSMUSG00000037868,<br>ENSMUSG00000038304, ENSMUSG00000049109,<br>ENSMUSG00000071713, ENSMUSG00000033777,<br>ENSMUSG00000058755, ENSMUSG00000026628, |  | ENSMUSG00000029195, ENSMUSG00000061527,<br>ENSMUSG00000044037, ENSMUSG00000049641,<br>ENSMUSG00000044322, ENSMUSG00000037010,<br>ENSMUSG00000032311, ENSMUSG00000051234,<br>ENSMUSG00000032076, ENSMUSG00000008035,<br>ENSMUSG00000034584, ENSMUSG00000004885,<br>ENSMUSG00000033544, ENSMUSG00000046093,<br>ENSMUSG00000032315, ENSMUSG00000047182,<br>ENSMUSG00000052217, ENSMUSG00000061723,<br>ENSMUSG00000032356, ENSMUSG00000050520,<br>ENSMUSG00000038775, ENSMUSG00000027913,<br>ENSMUSG00000059741, ENSMUSG00000031355,<br>ENSMUSG00000031380, ENSMUSG00000030730,<br>ENSMUSG00000033196, ENSMUSG00000035686,<br>ENSMUSG00000046714, ENSMUSG00000047419,<br>ENSMUSG00000035847, ENSMUSG00000021319,<br>ENSMUSG00000006269, ENSMUSG00000006457,<br>ENSMUSG00000041688, ENSMUSG00000052698,<br>ENSMUSG00000030607, ENSMUSG00000031996,<br>ENSMUSG00000042271, ENSMUSG00000047797,<br>ENSMUSG00000005705, ENSMUSG00000031146,<br>ENSMUSG00000026413, ENSMUSG00000006574,<br>ENSMUSG00000020623, ENSMUSG00000025784,<br>ENSMUSG00000032060, ENSMUSG00000029361,<br>ENSMUSG00000068890, ENSMUSG00000038119,<br>ENSMUSG00000040752, ENSMUSG00000035458, |
|--|--|--|------------------------------------------------------------------------------------------------------------------------------------------------------------------------------------------------------------------------------------------------------------------------------------------------------------------------------------------------------------------------------------------------------------------------------------------------------------------------------------------------------------------------------------------------------------------------------------------------------------------------------------------------------------------------------------------------------------------------------------------------------------------------------------------------------------------------------------------------------------------------------------------------------------------------------------------------------------------------------------------------------------------------------------------------------------------------------------------------------------------------------------------------------------|--|------------------------------------------------------------------------------------------------------------------------------------------------------------------------------------------------------------------------------------------------------------------------------------------------------------------------------------------------------------------------------------------------------------------------------------------------------------------------------------------------------------------------------------------------------------------------------------------------------------------------------------------------------------------------------------------------------------------------------------------------------------------------------------------------------------------------------------------------------------------------------------------------------------------------------------------------------------------------------------------------------------------------------------------------------------------------------------------------------------------------------------------------------------|

|  |  |  |                                                                                                                                                                                                                                                                                                                                                                                                                                                                                                                                                                                                                                                                                                                                                                                                                                                                                                                                                                                                                                                                                                                                                         |  |  |                                                                                                                                                                                                                                                                                                                                                                                                                                                                                                                                                                                                                                                                                                                                                                                                                                                                                                                                                                                                                                                                                                                                                         |
|--|--|--|---------------------------------------------------------------------------------------------------------------------------------------------------------------------------------------------------------------------------------------------------------------------------------------------------------------------------------------------------------------------------------------------------------------------------------------------------------------------------------------------------------------------------------------------------------------------------------------------------------------------------------------------------------------------------------------------------------------------------------------------------------------------------------------------------------------------------------------------------------------------------------------------------------------------------------------------------------------------------------------------------------------------------------------------------------------------------------------------------------------------------------------------------------|--|--|---------------------------------------------------------------------------------------------------------------------------------------------------------------------------------------------------------------------------------------------------------------------------------------------------------------------------------------------------------------------------------------------------------------------------------------------------------------------------------------------------------------------------------------------------------------------------------------------------------------------------------------------------------------------------------------------------------------------------------------------------------------------------------------------------------------------------------------------------------------------------------------------------------------------------------------------------------------------------------------------------------------------------------------------------------------------------------------------------------------------------------------------------------|
|  |  |  | ENSMUSG0000009185, ENSMUSG0000006930,<br>ENSMUSG00000015437, ENSMUSG00000045232,<br>ENSMUSG0000006398, ENSMUSG00000078452,<br>ENSMUSG00000026222, ENSMUSG00000025804,<br>ENSMUSG00000034652, ENSMUSG00000046718,<br>ENSMUSG00000051498, ENSMUSG00000000182,<br>ENSMUSG00000044811, ENSMUSG00000079019,<br>ENSMUSG00000070427, ENSMUSG00000032322,<br>ENSMUSG00000050578, ENSMUSG00000027306,<br>ENSMUSG00000002068, ENSMUSG00000030793,<br>ENSMUSG00000028678, ENSMUSG00000079620,<br>ENSMUSG00000030867, ENSMUSG00000079597,<br>ENSMUSG00000016498, ENSMUSG00000048806,<br>ENSMUSG00000044583, ENSMUSG00000029380,<br>ENSMUSG00000014686, ENSMUSG00000033952,<br>ENSMUSG00000021451, ENSMUSG00000022322,<br>ENSMUSG00000034730, ENSMUSG00000024696,<br>ENSMUSG00000029798, ENSMUSG00000073411,<br>ENSMUSG00000023132, ENSMUSG00000075122,<br>ENSMUSG00000017146, ENSMUSG00000029915,<br>ENSMUSG00000026285, ENSMUSG00000029366,<br>ENSMUSG00000072244, ENSMUSG00000030117,<br>ENSMUSG00000026890, ENSMUSG00000041324,<br>ENSMUSG00000024014, ENSMUSG00000057135,<br>ENSMUSG00000046688, ENSMUSG00000026573,<br>ENSMUSG00000036223, ENSMUSG00000043811, |  |  | ENSMUSG00000020096, ENSMUSG00000019326,<br>ENSMUSG00000032249, ENSMUSG0000005373,<br>ENSMUSG00000053093, ENSMUSG00000045103,<br>ENSMUSG00000038791, ENSMUSG00000062778,<br>ENSMUSG00000023235, ENSMUSG00000049493,<br>ENSMUSG00000020532, ENSMUSG0000009471,<br>ENSMUSG00000020123, ENSMUSG00000031495,<br>ENSMUSG00000055775, ENSMUSG00000020884,<br>ENSMUSG00000057454, ENSMUSG00000032310,<br>ENSMUSG00000026874, ENSMUSG0000004038,<br>ENSMUSG00000027022, ENSMUSG00000059495,<br>ENSMUSG00000089865, ENSMUSG00000044041,<br>ENSMUSG00000031176, ENSMUSG00000038776,<br>ENSMUSG00000059201, ENSMUSG00000027077,<br>ENSMUSG00000064057, ENSMUSG00000014846,<br>ENSMUSG00000027919, ENSMUSG00000000049,<br>ENSMUSG00000092137, ENSMUSG00000024471,<br>ENSMUSG00000031425, ENSMUSG00000030554,<br>ENSMUSG00000041729, ENSMUSG00000072966,<br>ENSMUSG00000025260, ENSMUSG00000068270,<br>ENSMUSG00000049556, ENSMUSG00000057003,<br>ENSMUSG00000024500, ENSMUSG00000059898,<br>ENSMUSG00000024028, ENSMUSG00000033595,<br>ENSMUSG00000020427, ENSMUSG00000061086,<br>ENSMUSG00000053310, ENSMUSG00000067653,<br>ENSMUSG00000091971, ENSMUSG00000032064, |
|--|--|--|---------------------------------------------------------------------------------------------------------------------------------------------------------------------------------------------------------------------------------------------------------------------------------------------------------------------------------------------------------------------------------------------------------------------------------------------------------------------------------------------------------------------------------------------------------------------------------------------------------------------------------------------------------------------------------------------------------------------------------------------------------------------------------------------------------------------------------------------------------------------------------------------------------------------------------------------------------------------------------------------------------------------------------------------------------------------------------------------------------------------------------------------------------|--|--|---------------------------------------------------------------------------------------------------------------------------------------------------------------------------------------------------------------------------------------------------------------------------------------------------------------------------------------------------------------------------------------------------------------------------------------------------------------------------------------------------------------------------------------------------------------------------------------------------------------------------------------------------------------------------------------------------------------------------------------------------------------------------------------------------------------------------------------------------------------------------------------------------------------------------------------------------------------------------------------------------------------------------------------------------------------------------------------------------------------------------------------------------------|

|  |  |  |                                                                                                                                                                                                                                                                                                                                                                                                                                                                                                                                                                                                                                                                                                                                                                                                                                                                                                                                                                                                                                                                                                                                                         |  |  |                                                                                                                                                                                                                                                                                                                                                                                                                                                                                                                                                                                                                                                                                                                                                                                                                                                                                                                                                                                                                                                                                                                                                           |
|--|--|--|---------------------------------------------------------------------------------------------------------------------------------------------------------------------------------------------------------------------------------------------------------------------------------------------------------------------------------------------------------------------------------------------------------------------------------------------------------------------------------------------------------------------------------------------------------------------------------------------------------------------------------------------------------------------------------------------------------------------------------------------------------------------------------------------------------------------------------------------------------------------------------------------------------------------------------------------------------------------------------------------------------------------------------------------------------------------------------------------------------------------------------------------------------|--|--|-----------------------------------------------------------------------------------------------------------------------------------------------------------------------------------------------------------------------------------------------------------------------------------------------------------------------------------------------------------------------------------------------------------------------------------------------------------------------------------------------------------------------------------------------------------------------------------------------------------------------------------------------------------------------------------------------------------------------------------------------------------------------------------------------------------------------------------------------------------------------------------------------------------------------------------------------------------------------------------------------------------------------------------------------------------------------------------------------------------------------------------------------------------|
|  |  |  | ENSMUSG00000026981, ENSMUSG00000049734,<br>ENSMUSG00000022901, ENSMUSG00000029371,<br>ENSMUSG00000045471, ENSMUSG00000044827,<br>ENSMUSG00000020649, ENSMUSG00000024339,<br>ENSMUSG00000045763, ENSMUSG00000041831,<br>ENSMUSG00000022021, ENSMUSG00000054136,<br>ENSMUSG00000032218, ENSMUSG00000033538,<br>ENSMUSG00000027995, ENSMUSG00000027699,<br>ENSMUSG0000003617, ENSMUSG00000020185,<br>ENSMUSG00000025877, ENSMUSG00000022831,<br>ENSMUSG0000005640, ENSMUSG00000050232,<br>ENSMUSG0000002055, ENSMUSG00000024222,<br>ENSMUSG00000033644, ENSMUSG00000022504,<br>ENSMUSG00000028071, ENSMUSG00000000247,<br>ENSMUSG00000027715, ENSMUSG00000027331,<br>ENSMUSG00000037321, ENSMUSG00000036912,<br>ENSMUSG00000030142, ENSMUSG00000045322,<br>ENSMUSG00000027322, ENSMUSG00000001444,<br>ENSMUSG00000006403, ENSMUSG00000002992,<br>ENSMUSG00000001228, ENSMUSG00000030149,<br>ENSMUSG00000041431, ENSMUSG00000037313,<br>ENSMUSG00000029304, ENSMUSG00000002307,<br>ENSMUSG00000053175, ENSMUSG00000030218,<br>ENSMUSG00000026656, ENSMUSG00000026582,<br>ENSMUSG00000017499, ENSMUSG00000030124,<br>ENSMUSG00000005470, ENSMUSG00000022876, |  |  | ENSMUSG00000015354, ENSMUSG00000031710,<br>ENSMUSG00000026532, ENSMUSG00000040533,<br>ENSMUSG00000050071, ENSMUSG00000032911,<br>ENSMUSG00000059824, ENSMUSG00000032340,<br>ENSMUSG00000068697, ENSMUSG00000019478,<br>ENSMUSG00000031097, ENSMUSG00000032377,<br>ENSMUSG00000033763, ENSMUSG00000059668,<br>ENSMUSG00000056978, ENSMUSG00000022206,<br>ENSMUSG00000026418, ENSMUSG00000049173,<br>ENSMUSG00000028307, ENSMUSG00000039956,<br>ENSMUSG00000032547, ENSMUSG00000039269,<br>ENSMUSG00000045539, ENSMUSG00000090877,<br>ENSMUSG00000026715, ENSMUSG00000002588,<br>ENSMUSG00000039952, ENSMUSG00000033615,<br>ENSMUSG0000003949, ENSMUSG00000071317,<br>ENSMUSG00000028356, ENSMUSG00000010051,<br>ENSMUSG00000036867, ENSMUSG00000061808,<br>ENSMUSG00000038967, ENSMUSG00000032348,<br>ENSMUSG00000042812, ENSMUSG00000064179,<br>ENSMUSG00000031214, ENSMUSG00000027470,<br>ENSMUSG00000026984, ENSMUSG00000041616,<br>ENSMUSG00000091898, ENSMUSG00000059327,<br>ENSMUSG00000032491, ENSMUSG00000023013,<br>ENSMUSG00000032083, ENSMUSG00000028989,<br>ENSMUSG00000031780, ENSMUSG00000059481,<br>ENSMUSG00000054196, ENSMUSG00000042903, |
|--|--|--|---------------------------------------------------------------------------------------------------------------------------------------------------------------------------------------------------------------------------------------------------------------------------------------------------------------------------------------------------------------------------------------------------------------------------------------------------------------------------------------------------------------------------------------------------------------------------------------------------------------------------------------------------------------------------------------------------------------------------------------------------------------------------------------------------------------------------------------------------------------------------------------------------------------------------------------------------------------------------------------------------------------------------------------------------------------------------------------------------------------------------------------------------------|--|--|-----------------------------------------------------------------------------------------------------------------------------------------------------------------------------------------------------------------------------------------------------------------------------------------------------------------------------------------------------------------------------------------------------------------------------------------------------------------------------------------------------------------------------------------------------------------------------------------------------------------------------------------------------------------------------------------------------------------------------------------------------------------------------------------------------------------------------------------------------------------------------------------------------------------------------------------------------------------------------------------------------------------------------------------------------------------------------------------------------------------------------------------------------------|

|  |  |  |                                                                                                                                                                                                                                                                                                                                                                                                                                                                                                                                                                                                                                                                                                                                                                                                                                                                                                                                                                                                                                                                                                                                                           |  |  |                                                                                                                                                                                                                                                                                                                                                                                                                                                                                                                                                                                                                                                                                                                                                                                                                                                                                                                                                                                                                                                                                                                                                           |
|--|--|--|-----------------------------------------------------------------------------------------------------------------------------------------------------------------------------------------------------------------------------------------------------------------------------------------------------------------------------------------------------------------------------------------------------------------------------------------------------------------------------------------------------------------------------------------------------------------------------------------------------------------------------------------------------------------------------------------------------------------------------------------------------------------------------------------------------------------------------------------------------------------------------------------------------------------------------------------------------------------------------------------------------------------------------------------------------------------------------------------------------------------------------------------------------------|--|--|-----------------------------------------------------------------------------------------------------------------------------------------------------------------------------------------------------------------------------------------------------------------------------------------------------------------------------------------------------------------------------------------------------------------------------------------------------------------------------------------------------------------------------------------------------------------------------------------------------------------------------------------------------------------------------------------------------------------------------------------------------------------------------------------------------------------------------------------------------------------------------------------------------------------------------------------------------------------------------------------------------------------------------------------------------------------------------------------------------------------------------------------------------------|
|  |  |  | ENSMUSG00000071715, ENSMUSG00000024079,<br>ENSMUSG00000040528, ENSMUSG00000036905,<br>ENSMUSG00000026822, ENSMUSG00000026429,<br>ENSMUSG00000071005, ENSMUSG00000029379,<br>ENSMUSG00000046845, ENSMUSG00000047517,<br>ENSMUSG00000029811, ENSMUSG00000038179,<br>ENSMUSG00000053063, ENSMUSG00000033880,<br>ENSMUSG00000025129, ENSMUSG00000068227,<br>ENSMUSG00000050957, ENSMUSG00000039899,<br>ENSMUSG00000022838, ENSMUSG00000027843,<br>ENSMUSG00000058715, ENSMUSG00000041754,<br>ENSMUSG00000023015, ENSMUSG0000004296,<br>ENSMUSG00000015947, ENSMUSG00000041515,<br>ENSMUSG00000023078, ENSMUSG00000020415,<br>ENSMUSG00000036986, ENSMUSG00000074622,<br>ENSMUSG00000028971, ENSMUSG00000025746,<br>ENSMUSG00000040658, ENSMUSG00000053113,<br>ENSMUSG00000066513, ENSMUSG00000060802,<br>ENSMUSG00000021403, ENSMUSG00000024989,<br>ENSMUSG00000018899, ENSMUSG00000016529,<br>ENSMUSG00000000392, ENSMUSG00000068744,<br>ENSMUSG00000028072, ENSMUSG00000018930,<br>ENSMUSG00000021714, ENSMUSG00000049502,<br>ENSMUSG00000022534, ENSMUSG00000029816,<br>ENSMUSG00000054072, ENSMUSG00000032586,<br>ENSMUSG00000034855, ENSMUSG00000026770, |  |  | ENSMUSG00000006235, ENSMUSG00000031997,<br>ENSMUSG00000052374, ENSMUSG00000031980,<br>ENSMUSG00000012705, ENSMUSG00000033831,<br>ENSMUSG00000031312, ENSMUSG00000052911,<br>ENSMUSG00000032380, ENSMUSG00000031841,<br>ENSMUSG00000024534, ENSMUSG00000033577,<br>ENSMUSG00000061311, ENSMUSG00000031972,<br>ENSMUSG00000031246, ENSMUSG00000022996,<br>ENSMUSG00000030359, ENSMUSG00000073601,<br>ENSMUSG00000032216, ENSMUSG00000028773,<br>ENSMUSG00000029019, ENSMUSG00000020469,<br>ENSMUSG00000057880, ENSMUSG0000000881,<br>ENSMUSG00000089996, ENSMUSG00000025386,<br>ENSMUSG00000040146, ENSMUSG00000021573,<br>ENSMUSG00000023046, ENSMUSG00000031144,<br>ENSMUSG00000032081, ENSMUSG00000025812,<br>ENSMUSG00000020052, ENSMUSG00000058914,<br>ENSMUSG00000032251, ENSMUSG00000010047,<br>ENSMUSG00000033327, ENSMUSG00000022491,<br>ENSMUSG00000032511, ENSMUSG00000020182,<br>ENSMUSG00000020524, ENSMUSG00000042379,<br>ENSMUSG00000026983, ENSMUSG00000039004,<br>ENSMUSG00000031812, ENSMUSG00000031253,<br>ENSMUSG00000056328, ENSMUSG00000025150,<br>ENSMUSG00000032839, ENSMUSG00000007877,<br>ENSMUSG00000090372, ENSMUSG00000040055, |
|--|--|--|-----------------------------------------------------------------------------------------------------------------------------------------------------------------------------------------------------------------------------------------------------------------------------------------------------------------------------------------------------------------------------------------------------------------------------------------------------------------------------------------------------------------------------------------------------------------------------------------------------------------------------------------------------------------------------------------------------------------------------------------------------------------------------------------------------------------------------------------------------------------------------------------------------------------------------------------------------------------------------------------------------------------------------------------------------------------------------------------------------------------------------------------------------------|--|--|-----------------------------------------------------------------------------------------------------------------------------------------------------------------------------------------------------------------------------------------------------------------------------------------------------------------------------------------------------------------------------------------------------------------------------------------------------------------------------------------------------------------------------------------------------------------------------------------------------------------------------------------------------------------------------------------------------------------------------------------------------------------------------------------------------------------------------------------------------------------------------------------------------------------------------------------------------------------------------------------------------------------------------------------------------------------------------------------------------------------------------------------------------------|

|  |  |  |                                                                                                                                                                                                                                                                                                                                                                                                                                                                                                                                                                                                                                                                                                                                                                                                                                                                                                                                                                                                                                                                                                        |  |  |                                                                                                                                                                                                                                                                                                                                                                                                                                                                                                                                                                                                                                                                                                                                                                                                                                                                                                                                                                                                                                                                                                        |
|--|--|--|--------------------------------------------------------------------------------------------------------------------------------------------------------------------------------------------------------------------------------------------------------------------------------------------------------------------------------------------------------------------------------------------------------------------------------------------------------------------------------------------------------------------------------------------------------------------------------------------------------------------------------------------------------------------------------------------------------------------------------------------------------------------------------------------------------------------------------------------------------------------------------------------------------------------------------------------------------------------------------------------------------------------------------------------------------------------------------------------------------|--|--|--------------------------------------------------------------------------------------------------------------------------------------------------------------------------------------------------------------------------------------------------------------------------------------------------------------------------------------------------------------------------------------------------------------------------------------------------------------------------------------------------------------------------------------------------------------------------------------------------------------------------------------------------------------------------------------------------------------------------------------------------------------------------------------------------------------------------------------------------------------------------------------------------------------------------------------------------------------------------------------------------------------------------------------------------------------------------------------------------------|
|  |  |  | ENSMUSG0000044701, ENSMUSG0000005696,<br>ENSMUSG0000018920, ENSMUSG0000040751,<br>ENSMUSG0000070691, ENSMUSG0000030525,<br>ENSMUSG0000040552, ENSMUSG0000040627,<br>ENSMUSG0000035373, ENSMUSG0000024795,<br>ENSMUSG0000057465, ENSMUSG0000025498,<br>ENSMUSG0000050241, ENSMUSG0000031872,<br>ENSMUSG0000012443, ENSMUSG0000022622,<br>ENSMUSG0000024397, ENSMUSG0000000386,<br>ENSMUSG0000038580, ENSMUSG0000038508,<br>ENSMUSG0000053219, ENSMUSG0000037872,<br>ENSMUSG0000074148, ENSMUSG0000024791,<br>ENSMUSG0000058427, ENSMUSG0000029417,<br>ENSMUSG0000061100, ENSMUSG0000035951,<br>ENSMUSG0000026605, ENSMUSG0000074115,<br>ENSMUSG0000029378, ENSMUSG0000035385,<br>ENSMUSG0000031004, ENSMUSG0000026166,<br>ENSMUSG0000058773, ENSMUSG0000027078,<br>ENSMUSG0000028874, ENSMUSG0000037860,<br>ENSMUSG0000030365, ENSMUSG0000073489,<br>ENSMUSG0000024056, ENSMUSG0000027469,<br>ENSMUSG0000019320, ENSMUSG0000079227,<br>ENSMUSG0000036469, ENSMUSG0000035683,<br>ENSMUSG0000030154, ENSMUSG0000026104,<br>ENSMUSG0000040033, ENSMUSG0000062082,<br>ENSMUSG0000024349, ENSMUSG0000056494, |  |  | ENSMUSG0000022878, ENSMUSG0000001349,<br>ENSMUSG0000008658, ENSMUSG0000013076,<br>ENSMUSG0000025860, ENSMUSG0000062713,<br>ENSMUSG0000023019, ENSMUSG0000032086,<br>ENSMUSG0000058135, ENSMUSG0000048455,<br>ENSMUSG0000001494, ENSMUSG0000050730,<br>ENSMUSG0000034563, ENSMUSG0000050164,<br>ENSMUSG0000025271, ENSMUSG0000039585,<br>ENSMUSG0000029205, ENSMUSG0000015405,<br>ENSMUSG0000046814, ENSMUSG0000042124,<br>ENSMUSG0000025265, ENSMUSG0000032531,<br>ENSMUSG0000032047, ENSMUSG0000027796,<br>ENSMUSG0000025810, ENSMUSG0000040488,<br>ENSMUSG0000029368, ENSMUSG0000032366,<br>ENSMUSG0000055980, ENSMUSG0000040147,<br>ENSMUSG0000029236, ENSMUSG0000057182,<br>ENSMUSG0000041012, ENSMUSG0000032010,<br>ENSMUSG0000001986, ENSMUSG0000018566,<br>ENSMUSG0000021055, ENSMUSG0000031489,<br>ENSMUSG0000041361, ENSMUSG0000031431,<br>ENSMUSG0000001300, ENSMUSG0000032067,<br>ENSMUSG0000060180, ENSMUSG0000073465,<br>ENSMUSG0000024526, ENSMUSG0000030546,<br>ENSMUSG0000055653, ENSMUSG0000060913,<br>ENSMUSG0000024039, ENSMUSG0000032198,<br>ENSMUSG0000001134, ENSMUSG0000007815, |
|--|--|--|--------------------------------------------------------------------------------------------------------------------------------------------------------------------------------------------------------------------------------------------------------------------------------------------------------------------------------------------------------------------------------------------------------------------------------------------------------------------------------------------------------------------------------------------------------------------------------------------------------------------------------------------------------------------------------------------------------------------------------------------------------------------------------------------------------------------------------------------------------------------------------------------------------------------------------------------------------------------------------------------------------------------------------------------------------------------------------------------------------|--|--|--------------------------------------------------------------------------------------------------------------------------------------------------------------------------------------------------------------------------------------------------------------------------------------------------------------------------------------------------------------------------------------------------------------------------------------------------------------------------------------------------------------------------------------------------------------------------------------------------------------------------------------------------------------------------------------------------------------------------------------------------------------------------------------------------------------------------------------------------------------------------------------------------------------------------------------------------------------------------------------------------------------------------------------------------------------------------------------------------------|



|                    |                                  |                 |    |                                                                                                                                                                                                                                                                                                                                                                                                                                                                                                            |             |    |                                                                                                                                                                                                                                                                                                                                                                                                                                                                                                                                                                                                                                                                                                                                    |
|--------------------|----------------------------------|-----------------|----|------------------------------------------------------------------------------------------------------------------------------------------------------------------------------------------------------------------------------------------------------------------------------------------------------------------------------------------------------------------------------------------------------------------------------------------------------------------------------------------------------------|-------------|----|------------------------------------------------------------------------------------------------------------------------------------------------------------------------------------------------------------------------------------------------------------------------------------------------------------------------------------------------------------------------------------------------------------------------------------------------------------------------------------------------------------------------------------------------------------------------------------------------------------------------------------------------------------------------------------------------------------------------------------|
|                    |                                  |                 |    | ENSMUSG00000046179, ENSMUSG00000038943,<br>ENSMUSG00000034422, ENSMUSG00000040829,<br>ENSMUSG00000024529, ENSMUSG00000034116,<br>ENSMUSG00000021765, ENSMUSG00000042726,<br>ENSMUSG00000030111, ENSMUSG00000026177                                                                                                                                                                                                                                                                                         |             |    | ENSMUSG00000025991, ENSMUSG00000043165,<br>ENSMUSG00000069441, ENSMUSG00000034467,<br>ENSMUSG00000035540, ENSMUSG00000030747,<br>ENSMUSG00000071347                                                                                                                                                                                                                                                                                                                                                                                                                                                                                                                                                                                |
| GO:<br>0004<br>857 | enzyme inhibitor activity        | 0.29335033<br>4 | 23 | ENSMUSG00000017716, ENSMUSG00000038037,<br>ENSMUSG00000074148, ENSMUSG00000029664,<br>ENSMUSG00000066363, ENSMUSG00000021403,<br>ENSMUSG0000002992, ENSMUSG00000041481,<br>ENSMUSG00000059657, ENSMUSG00000068129,<br>ENSMUSG00000041536, ENSMUSG00000001131,<br>ENSMUSG00000020415, ENSMUSG00000058207,<br>ENSMUSG00000079597, ENSMUSG00000079012,<br>ENSMUSG00000025129, ENSMUSG00000061947,<br>ENSMUSG00000066364, ENSMUSG00000021091,<br>ENSMUSG00000030111, ENSMUSG00000066361,<br>ENSMUSG00000051949 | 3.29E-05    | 33 | ENSMUSG00000042045, ENSMUSG00000025889,<br>ENSMUSG00000026715, ENSMUSG00000011632,<br>ENSMUSG00000039278, ENSMUSG00000026874,<br>ENSMUSG00000023336, ENSMUSG00000031760,<br>ENSMUSG00000028356, ENSMUSG00000030359,<br>ENSMUSG00000058260, ENSMUSG00000019278,<br>ENSMUSG00000055561, ENSMUSG00000022871,<br>ENSMUSG00000070531, ENSMUSG00000073601,<br>ENSMUSG00000025860, ENSMUSG00000055653,<br>ENSMUSG00000022868, ENSMUSG00000073602,<br>ENSMUSG00000027077, ENSMUSG00000044594,<br>ENSMUSG00000058017, ENSMUSG00000059956,<br>ENSMUSG00000067006, ENSMUSG00000026327,<br>ENSMUSG00000024653, ENSMUSG00000032081,<br>ENSMUSG00000032083, ENSMUSG00000027442,<br>ENSMUSG00000046814, ENSMUSG00000031980,<br>ENSMUSG00000010047 |
| GO:<br>0019<br>956 | chemokine binding                | 0.00093265<br>9 | 6  | ENSMUSG00000050232, ENSMUSG00000025804,<br>ENSMUSG00000049103, ENSMUSG00000079227,<br>ENSMUSG00000030111, ENSMUSG00000037872                                                                                                                                                                                                                                                                                                                                                                               | 1           | 0  |                                                                                                                                                                                                                                                                                                                                                                                                                                                                                                                                                                                                                                                                                                                                    |
| GO:                | structural constituent of muscle | 1               | 0  |                                                                                                                                                                                                                                                                                                                                                                                                                                                                                                            | 0.001776137 | 7  | ENSMUSG00000030554, ENSMUSG00000039952,                                                                                                                                                                                                                                                                                                                                                                                                                                                                                                                                                                                                                                                                                            |

|                    |                   |          |    |                                                                                                                                                                                                                                                                                                                                                                                                                                                                                                                                                                                                                        |             |    |                                                                                                                                                                                                                                                                                                                                                                                               |
|--------------------|-------------------|----------|----|------------------------------------------------------------------------------------------------------------------------------------------------------------------------------------------------------------------------------------------------------------------------------------------------------------------------------------------------------------------------------------------------------------------------------------------------------------------------------------------------------------------------------------------------------------------------------------------------------------------------|-------------|----|-----------------------------------------------------------------------------------------------------------------------------------------------------------------------------------------------------------------------------------------------------------------------------------------------------------------------------------------------------------------------------------------------|
| 0008<br>307        |                   |          |    |                                                                                                                                                                                                                                                                                                                                                                                                                                                                                                                                                                                                                        |             |    | ENSMUSG00000030672, ENSMUSG00000053093,<br>ENSMUSG00000045103, ENSMUSG00000007877,<br>ENSMUSG00000040752                                                                                                                                                                                                                                                                                      |
| GO:<br>0020<br>037 | heme binding      | 1        | 5  | ENSMUSG0000003484, ENSMUSG00000003555,<br>ENSMUSG00000030895, ENSMUSG00000031551,<br>ENSMUSG00000039519                                                                                                                                                                                                                                                                                                                                                                                                                                                                                                                | 0.000182641 | 18 | ENSMUSG00000003053, ENSMUSG00000074254,<br>ENSMUSG00000066072, ENSMUSG00000052974,<br>ENSMUSG00000024039, ENSMUSG00000018893,<br>ENSMUSG00000032315, ENSMUSG00000032310,<br>ENSMUSG0000006373, ENSMUSG00000052217,<br>ENSMUSG00000028356, ENSMUSG00000075217,<br>ENSMUSG00000021032, ENSMUSG00000029361,<br>ENSMUSG00000066071, ENSMUSG00000055609,<br>ENSMUSG00000052187, ENSMUSG00000073424 |
| GO:<br>0005<br>125 | cytokine activity | 4.13E-15 | 38 | ENSMUSG00000058755, ENSMUSG00000035352,<br>ENSMUSG00000058427, ENSMUSG00000029379,<br>ENSMUSG00000071005, ENSMUSG00000060747,<br>ENSMUSG00000029417, ENSMUSG00000009185,<br>ENSMUSG00000046845, ENSMUSG00000016529,<br>ENSMUSG00000029378, ENSMUSG00000035385,<br>ENSMUSG00000026166, ENSMUSG00000030413,<br>ENSMUSG00000018930, ENSMUSG00000000817,<br>ENSMUSG00000027398, ENSMUSG00000030117,<br>ENSMUSG00000034855, ENSMUSG00000028362,<br>ENSMUSG00000041324, ENSMUSG00000044701,<br>ENSMUSG00000055170, ENSMUSG00000018920,<br>ENSMUSG00000035042, ENSMUSG00000026573,<br>ENSMUSG00000035373, ENSMUSG00000029304, | 1           | 7  | ENSMUSG00000031780, ENSMUSG00000041012,<br>ENSMUSG00000023235, ENSMUSG00000026983,<br>ENSMUSG00000026984, ENSMUSG00000039004,<br>ENSMUSG00000064057                                                                                                                                                                                                                                           |

|                    |                           |   |    |                                                                                                                                                                                                                                                                                                                                                                                                                                                                                                                                                                                                                                                                                                                                                                                                                                                                                                               |             |    |                                                                                                                                                                                                                                                                                                                                                                                                                                                                                                                                                                                                                                                                                                                                                                                                                                                                                                                                      |
|--------------------|---------------------------|---|----|---------------------------------------------------------------------------------------------------------------------------------------------------------------------------------------------------------------------------------------------------------------------------------------------------------------------------------------------------------------------------------------------------------------------------------------------------------------------------------------------------------------------------------------------------------------------------------------------------------------------------------------------------------------------------------------------------------------------------------------------------------------------------------------------------------------------------------------------------------------------------------------------------------------|-------------|----|--------------------------------------------------------------------------------------------------------------------------------------------------------------------------------------------------------------------------------------------------------------------------------------------------------------------------------------------------------------------------------------------------------------------------------------------------------------------------------------------------------------------------------------------------------------------------------------------------------------------------------------------------------------------------------------------------------------------------------------------------------------------------------------------------------------------------------------------------------------------------------------------------------------------------------------|
|                    |                           |   |    | ENSMUSG0000004296, ENSMUSG00000000982,<br>ENSMUSG00000038067, ENSMUSG00000023078,<br>ENSMUSG00000029371, ENSMUSG00000034394,<br>ENSMUSG00000024401, ENSMUSG00000048806,<br>ENSMUSG00000025746, ENSMUSG00000029380                                                                                                                                                                                                                                                                                                                                                                                                                                                                                                                                                                                                                                                                                             |             |    |                                                                                                                                                                                                                                                                                                                                                                                                                                                                                                                                                                                                                                                                                                                                                                                                                                                                                                                                      |
| GO:<br>0042<br>802 | identical protein binding | 1 | 41 | ENSMUSG00000017716, ENSMUSG00000036905,<br>ENSMUSG00000026628, ENSMUSG00000026822,<br>ENSMUSG00000027699, ENSMUSG00000029811,<br>ENSMUSG00000026605, ENSMUSG00000049103,<br>ENSMUSG00000053977, ENSMUSG00000020185,<br>ENSMUSG00000023132, ENSMUSG00000030268,<br>ENSMUSG00000028072, ENSMUSG00000047230,<br>ENSMUSG00000026222, ENSMUSG00000040296,<br>ENSMUSG00000029366, ENSMUSG00000046718,<br>ENSMUSG00000054072, ENSMUSG00000037321,<br>ENSMUSG00000041324, ENSMUSG00000026104,<br>ENSMUSG00000035042, ENSMUSG00000002992,<br>ENSMUSG00000030149, ENSMUSG00000024349,<br>ENSMUSG00000030525, ENSMUSG00000026573,<br>ENSMUSG0000004296, ENSMUSG00000002307,<br>ENSMUSG00000049734, ENSMUSG00000046179,<br>ENSMUSG00000050241, ENSMUSG00000030793,<br>ENSMUSG00000038943, ENSMUSG00000079298,<br>ENSMUSG00000036986, ENSMUSG00000024401,<br>ENSMUSG00000024339, ENSMUSG00000040658,<br>ENSMUSG00000026177 | 0.007162928 | 58 | ENSMUSG00000031380, ENSMUSG00000030730,<br>ENSMUSG00000031495, ENSMUSG00000032366,<br>ENSMUSG00000025889, ENSMUSG00000040147,<br>ENSMUSG00000023328, ENSMUSG00000035686,<br>ENSMUSG00000032380, ENSMUSG00000047419,<br>ENSMUSG00000027849, ENSMUSG00000020884,<br>ENSMUSG00000031841, ENSMUSG00000002588,<br>ENSMUSG00000032010, ENSMUSG00000021909,<br>ENSMUSG00000006457, ENSMUSG000000061311,<br>ENSMUSG00000004038, ENSMUSG00000033208,<br>ENSMUSG00000031996, ENSMUSG00000047797,<br>ENSMUSG00000031489, ENSMUSG00000028356,<br>ENSMUSG00000031176, ENSMUSG00000006574,<br>ENSMUSG00000044037, ENSMUSG00000032060,<br>ENSMUSG00000032067, ENSMUSG00000029361,<br>ENSMUSG00000032348, ENSMUSG00000038967,<br>ENSMUSG00000068890, ENSMUSG00000057880,<br>ENSMUSG00000032076, ENSMUSG00000022878,<br>ENSMUSG00000040752, ENSMUSG00000013076,<br>ENSMUSG00000023019, ENSMUSG00000019326,<br>ENSMUSG00000060913, ENSMUSG00000024039, |

|                    |                              |   |    |                                                                                                                                                                                                                                                                |            |                                                                                                                                                                                                                                                                                                                                                                                                                                                                                                                   |
|--------------------|------------------------------|---|----|----------------------------------------------------------------------------------------------------------------------------------------------------------------------------------------------------------------------------------------------------------------|------------|-------------------------------------------------------------------------------------------------------------------------------------------------------------------------------------------------------------------------------------------------------------------------------------------------------------------------------------------------------------------------------------------------------------------------------------------------------------------------------------------------------------------|
|                    |                              |   |    |                                                                                                                                                                                                                                                                |            | ENSMUSG00000058135, ENSMUSG00000091898,<br>ENSMUSG00000053093, ENSMUSG00000025271,<br>ENSMUSG00000031144, ENSMUSG00000032083,<br>ENSMUSG00000030747, ENSMUSG00000058914,<br>ENSMUSG00000020052, ENSMUSG00000022206,<br>ENSMUSG00000006235, ENSMUSG00000025260,<br>ENSMUSG00000052374, ENSMUSG00000032047,<br>ENSMUSG00000032531, ENSMUSG00000028307                                                                                                                                                               |
| GO:<br>0031<br>406 | carboxylic acid binding      | 1 | 2  | ENSMUSG00000023045, ENSMUSG00000031551                                                                                                                                                                                                                         | 0.00074326 | 23<br>ENSMUSG00000006675, ENSMUSG00000032374,<br>ENSMUSG00000029368, ENSMUSG00000025889,<br>ENSMUSG00000025270, ENSMUSG00000004885,<br>ENSMUSG00000054422, ENSMUSG00000024039,<br>ENSMUSG00000020182, ENSMUSG00000025991,<br>ENSMUSG00000027513, ENSMUSG00000026691,<br>ENSMUSG00000019278, ENSMUSG00000032216,<br>ENSMUSG00000074183, ENSMUSG00000028773,<br>ENSMUSG00000046814, ENSMUSG00000057933,<br>ENSMUSG00000024892, ENSMUSG00000032348,<br>ENSMUSG00000025153, ENSMUSG00000020532,<br>ENSMUSG00000002769 |
| GO:<br>0008<br>092 | cytoskeletal protein binding | 1 | 13 | ENSMUSG00000068744, ENSMUSG00000017716,<br>ENSMUSG00000028678, ENSMUSG00000002055,<br>ENSMUSG00000030867, ENSMUSG00000032322,<br>ENSMUSG00000024397, ENSMUSG00000036223,<br>ENSMUSG00000022534, ENSMUSG00000027306,<br>ENSMUSG00000079227, ENSMUSG00000023015, | 1.63E-07   | 56<br>ENSMUSG00000068270, ENSMUSG00000032366,<br>ENSMUSG00000025889, ENSMUSG00000055775,<br>ENSMUSG00000033196, ENSMUSG00000057003,<br>ENSMUSG00000020524, ENSMUSG00000039952,<br>ENSMUSG00000033577, ENSMUSG00000021909,<br>ENSMUSG00000006457, ENSMUSG00000025172,                                                                                                                                                                                                                                              |

|                    |                              |                 |    |                                                                                                                                                                 |          |    |                                                                                                                                                                                                                                                                                                                                                                                                                                                                                                                                                                                                                                                                                                                                                                                                                                                                                                             |
|--------------------|------------------------------|-----------------|----|-----------------------------------------------------------------------------------------------------------------------------------------------------------------|----------|----|-------------------------------------------------------------------------------------------------------------------------------------------------------------------------------------------------------------------------------------------------------------------------------------------------------------------------------------------------------------------------------------------------------------------------------------------------------------------------------------------------------------------------------------------------------------------------------------------------------------------------------------------------------------------------------------------------------------------------------------------------------------------------------------------------------------------------------------------------------------------------------------------------------------|
|                    |                              |                 |    | ENSMUSG00000022021                                                                                                                                              |          |    | ENSMUSG00000052698, ENSMUSG00000027022, ENSMUSG00000031812, ENSMUSG00000056328, ENSMUSG00000061086, ENSMUSG00000067653, ENSMUSG00000066574, ENSMUSG00000032060, ENSMUSG00000028773, ENSMUSG00000032064, ENSMUSG0000007877, ENSMUSG00000060180, ENSMUSG0000001349, ENSMUSG00000026532, ENSMUSG00000040752, ENSMUSG00000064179, ENSMUSG00000035458, ENSMUSG00000031214, ENSMUSG00000027470, ENSMUSG00000089996, ENSMUSG0000001134, ENSMUSG00000007815, ENSMUSG00000091898, ENSMUSG00000014846, ENSMUSG00000053093, ENSMUSG00000050730, ENSMUSG00000021573, ENSMUSG00000068697, ENSMUSG00000023013, ENSMUSG00000061723, ENSMUSG00000031097, ENSMUSG00000039585, ENSMUSG00000033763, ENSMUSG00000045103, ENSMUSG00000035540, ENSMUSG00000038775, ENSMUSG00000024471, ENSMUSG00000059741, ENSMUSG00000030554, ENSMUSG00000041729, ENSMUSG00000026418, ENSMUSG00000052374, ENSMUSG00000049493, ENSMUSG00000028307 |
| GO:<br>0030<br>414 | peptidase inhibitor activity | 0.00668696<br>3 | 20 | ENSMUSG00000017716, ENSMUSG00000074148, ENSMUSG00000029664, ENSMUSG00000066363, ENSMUSG00000021403, ENSMUSG00000041481, ENSMUSG00000059657, ENSMUSG00000068129, | 2.70E-05 | 25 | ENSMUSG00000025860, ENSMUSG00000055653, ENSMUSG00000022868, ENSMUSG00000025889, ENSMUSG00000073602, ENSMUSG00000026715, ENSMUSG00000044594, ENSMUSG00000058017,                                                                                                                                                                                                                                                                                                                                                                                                                                                                                                                                                                                                                                                                                                                                             |

|                    |                                    |                 |    |                                                                                                                                                                                                                                                                                                                                                                                                                                                                                                                                 |          |    |                                                                                                                                                                                                                                                                                                                                                                            |
|--------------------|------------------------------------|-----------------|----|---------------------------------------------------------------------------------------------------------------------------------------------------------------------------------------------------------------------------------------------------------------------------------------------------------------------------------------------------------------------------------------------------------------------------------------------------------------------------------------------------------------------------------|----------|----|----------------------------------------------------------------------------------------------------------------------------------------------------------------------------------------------------------------------------------------------------------------------------------------------------------------------------------------------------------------------------|
|                    |                                    |                 |    | ENSMUSG00000041536, ENSMUSG00000001131,<br>ENSMUSG00000020415, ENSMUSG00000058207,<br>ENSMUSG00000079597, ENSMUSG00000079012,<br>ENSMUSG00000061947, ENSMUSG00000066364,<br>ENSMUSG00000021091, ENSMUSG00000030111,<br>ENSMUSG00000066361, ENSMUSG00000051949                                                                                                                                                                                                                                                                   |          |    | ENSMUSG00000039278, ENSMUSG00000026874,<br>ENSMUSG00000059956, ENSMUSG00000067006,<br>ENSMUSG00000023336, ENSMUSG00000031760,<br>ENSMUSG00000026327, ENSMUSG00000028356,<br>ENSMUSG00000030359, ENSMUSG00000058260,<br>ENSMUSG00000055561, ENSMUSG00000022871,<br>ENSMUSG00000019278, ENSMUSG00000070531,<br>ENSMUSG00000073601, ENSMUSG00000027442,<br>ENSMUSG00000031980 |
| GO:<br>0001<br>664 | G-protein coupled receptor binding | 0.00027070<br>5 | 24 | ENSMUSG00000018920, ENSMUSG00000035352,<br>ENSMUSG00000026104, ENSMUSG00000058427,<br>ENSMUSG00000029379, ENSMUSG00000035042,<br>ENSMUSG00000071005, ENSMUSG00000009185,<br>ENSMUSG00000026573, ENSMUSG00000035373,<br>ENSMUSG00000074115, ENSMUSG00000035385,<br>ENSMUSG00000000982, ENSMUSG00000045232,<br>ENSMUSG00000018486, ENSMUSG00000045471,<br>ENSMUSG00000023078, ENSMUSG00000029371,<br>ENSMUSG00000026166, ENSMUSG00000018930,<br>ENSMUSG00000028971, ENSMUSG00000029380,<br>ENSMUSG00000034855, ENSMUSG00000079019 | 1        | 17 | ENSMUSG00000039956, ENSMUSG00000020123,<br>ENSMUSG00000032547, ENSMUSG00000029236,<br>ENSMUSG00000020524, ENSMUSG00000024028,<br>ENSMUSG00000026874, ENSMUSG00000059495,<br>ENSMUSG00000022996, ENSMUSG00000031489,<br>ENSMUSG00000032216, ENSMUSG00000031780,<br>ENSMUSG00000054196, ENSMUSG00000072966,<br>ENSMUSG00000023235, ENSMUSG00000037010,<br>ENSMUSG00000031980 |
| GO:<br>0061<br>135 | endopeptidase regulator activity   | 0.00566047      | 20 | ENSMUSG00000017716, ENSMUSG00000074148,<br>ENSMUSG00000029664, ENSMUSG00000066363,<br>ENSMUSG00000021403, ENSMUSG00000041481,<br>ENSMUSG00000059657, ENSMUSG00000068129,<br>ENSMUSG00000041536, ENSMUSG00000001131,                                                                                                                                                                                                                                                                                                             | 8.76E-05 | 24 | ENSMUSG00000025860, ENSMUSG00000022868,<br>ENSMUSG00000025889, ENSMUSG00000073602,<br>ENSMUSG00000026715, ENSMUSG00000044594,<br>ENSMUSG00000058017, ENSMUSG00000039278,<br>ENSMUSG00000026874, ENSMUSG00000059956,                                                                                                                                                        |

|                    |                      |   |    |                                                                                                                                                                                                                                                                                                            |             |    |                                                                                                                                                                                                                                                                                                                                                                                                   |
|--------------------|----------------------|---|----|------------------------------------------------------------------------------------------------------------------------------------------------------------------------------------------------------------------------------------------------------------------------------------------------------------|-------------|----|---------------------------------------------------------------------------------------------------------------------------------------------------------------------------------------------------------------------------------------------------------------------------------------------------------------------------------------------------------------------------------------------------|
|                    |                      |   |    | ENSMUSG00000020415, ENSMUSG00000058207,<br>ENSMUSG00000079597, ENSMUSG00000079012,<br>ENSMUSG00000061947, ENSMUSG00000066364,<br>ENSMUSG00000021091, ENSMUSG00000030111,<br>ENSMUSG00000066361, ENSMUSG00000051949                                                                                         |             |    | ENSMUSG00000067006, ENSMUSG00000023336,<br>ENSMUSG00000031760, ENSMUSG00000026327,<br>ENSMUSG00000028356, ENSMUSG00000030359,<br>ENSMUSG00000058260, ENSMUSG00000055561,<br>ENSMUSG00000022871, ENSMUSG00000019278,<br>ENSMUSG00000070531, ENSMUSG00000073601,<br>ENSMUSG00000027442, ENSMUSG00000031980                                                                                          |
| GO:<br>0016<br>918 | retinal binding      | 1 | 0  |                                                                                                                                                                                                                                                                                                            | 0.000805435 | 6  | ENSMUSG00000046402, ENSMUSG00000028996,<br>ENSMUSG00000024990, ENSMUSG00000004885,<br>ENSMUSG00000032454, ENSMUSG00000032291                                                                                                                                                                                                                                                                      |
| GO:<br>0046<br>906 | tetrapyrrole binding | 1 | 5  | ENSMUSG00000003484, ENSMUSG00000003555,<br>ENSMUSG00000030895, ENSMUSG00000031551,<br>ENSMUSG00000039519                                                                                                                                                                                                   | 0.000468031 | 18 | ENSMUSG00000003053, ENSMUSG000000074254,<br>ENSMUSG000000066072, ENSMUSG000000052974,<br>ENSMUSG00000024039, ENSMUSG00000018893,<br>ENSMUSG00000032315, ENSMUSG00000032310,<br>ENSMUSG00000006373, ENSMUSG00000052217,<br>ENSMUSG00000028356, ENSMUSG00000075217,<br>ENSMUSG00000021032, ENSMUSG00000029361,<br>ENSMUSG00000066071, ENSMUSG00000055609,<br>ENSMUSG00000052187, ENSMUSG00000073424 |
| GO:<br>0005<br>215 | transporter activity | 1 | 32 | ENSMUSG00000038963, ENSMUSG000000024112,<br>ENSMUSG00000026822, ENSMUSG00000031098,<br>ENSMUSG00000028255, ENSMUSG00000001095,<br>ENSMUSG00000047197, ENSMUSG00000029811,<br>ENSMUSG00000037202, ENSMUSG00000001901,<br>ENSMUSG00000020848, ENSMUSG00000028217,<br>ENSMUSG00000011008, ENSMUSG00000020651, | 0.00570884  | 71 | ENSMUSG00000030302, ENSMUSG00000062515,<br>ENSMUSG00000070570, ENSMUSG00000054422,<br>ENSMUSG00000032511, ENSMUSG00000027849,<br>ENSMUSG00000026824, ENSMUSG00000020524,<br>ENSMUSG00000090639, ENSMUSG00000033615,<br>ENSMUSG00000032454, ENSMUSG00000058921,<br>ENSMUSG00000078621, ENSMUSG00000028356,                                                                                         |

|  |  |  |                                                                                                                                                                                                                                                                                                                                                                                                |  |                                                                                                                                                                                                                                                                                                                                                                                                                                                                                                                                                                                                                                                                                                                                                                                                                                                                                                                                                                                                                                                                                                                                                            |
|--|--|--|------------------------------------------------------------------------------------------------------------------------------------------------------------------------------------------------------------------------------------------------------------------------------------------------------------------------------------------------------------------------------------------------|--|------------------------------------------------------------------------------------------------------------------------------------------------------------------------------------------------------------------------------------------------------------------------------------------------------------------------------------------------------------------------------------------------------------------------------------------------------------------------------------------------------------------------------------------------------------------------------------------------------------------------------------------------------------------------------------------------------------------------------------------------------------------------------------------------------------------------------------------------------------------------------------------------------------------------------------------------------------------------------------------------------------------------------------------------------------------------------------------------------------------------------------------------------------|
|  |  |  | ENSMUSG00000037321, ENSMUSG00000028262,<br>ENSMUSG00000040010, ENSMUSG00000053395,<br>ENSMUSG00000027219, ENSMUSG00000022548,<br>ENSMUSG00000049303, ENSMUSG00000030525,<br>ENSMUSG00000035355, ENSMUSG00000056494,<br>ENSMUSG00000009292, ENSMUSG00000021983,<br>ENSMUSG00000072572, ENSMUSG00000022094,<br>ENSMUSG00000056025, ENSMUSG00000024339,<br>ENSMUSG00000047330, ENSMUSG00000026177 |  | ENSMUSG00000041633, ENSMUSG00000032839,<br>ENSMUSG00000032291, ENSMUSG00000074218,<br>ENSMUSG00000052187, ENSMUSG00000004885,<br>ENSMUSG00000032034, ENSMUSG00000059412,<br>ENSMUSG00000028427, ENSMUSG00000038201,<br>ENSMUSG00000052305, ENSMUSG00000030785,<br>ENSMUSG00000052217, ENSMUSG00000023013,<br>ENSMUSG00000024990, ENSMUSG00000029205,<br>ENSMUSG00000032083, ENSMUSG00000032548,<br>ENSMUSG00000049281, ENSMUSG00000033965,<br>ENSMUSG00000031997, ENSMUSG00000019894,<br>ENSMUSG00000045775, ENSMUSG00000025488,<br>ENSMUSG00000030730, ENSMUSG00000046480,<br>ENSMUSG00000018893, ENSMUSG00000057182,<br>ENSMUSG00000046402, ENSMUSG00000006269,<br>ENSMUSG00000032554, ENSMUSG00000001986,<br>ENSMUSG00000018566, ENSMUSG00000047797,<br>ENSMUSG00000020566, ENSMUSG00000006574,<br>ENSMUSG00000028773, ENSMUSG00000021032,<br>ENSMUSG00000055609, ENSMUSG00000031710,<br>ENSMUSG00000051726, ENSMUSG00000019326,<br>ENSMUSG00000032570, ENSMUSG00000010064,<br>ENSMUSG00000061273, ENSMUSG00000027887,<br>ENSMUSG00000019478, ENSMUSG00000028996,<br>ENSMUSG00000020295, ENSMUSG00000031144,<br>ENSMUSG00000073063, ENSMUSG00000035540, |
|--|--|--|------------------------------------------------------------------------------------------------------------------------------------------------------------------------------------------------------------------------------------------------------------------------------------------------------------------------------------------------------------------------------------------------|--|------------------------------------------------------------------------------------------------------------------------------------------------------------------------------------------------------------------------------------------------------------------------------------------------------------------------------------------------------------------------------------------------------------------------------------------------------------------------------------------------------------------------------------------------------------------------------------------------------------------------------------------------------------------------------------------------------------------------------------------------------------------------------------------------------------------------------------------------------------------------------------------------------------------------------------------------------------------------------------------------------------------------------------------------------------------------------------------------------------------------------------------------------------|



|                    |                  |   |   |                                                                                                                                                                                               |             |                                                                                                                                                                                                                                                                                                                                                                                                                                                                                                                                      |
|--------------------|------------------|---|---|-----------------------------------------------------------------------------------------------------------------------------------------------------------------------------------------------|-------------|--------------------------------------------------------------------------------------------------------------------------------------------------------------------------------------------------------------------------------------------------------------------------------------------------------------------------------------------------------------------------------------------------------------------------------------------------------------------------------------------------------------------------------------|
|                    |                  |   |   |                                                                                                                                                                                               |             | ENSMUSG00000029862, ENSMUSG00000034810,<br>ENSMUSG00000020722, ENSMUSG00000026961,<br>ENSMUSG00000037624                                                                                                                                                                                                                                                                                                                                                                                                                             |
| GO:<br>0019<br>842 | vitamin binding  | 1 | 0 |                                                                                                                                                                                               | 2.33E-06    | 22<br>ENSMUSG0000006675, ENSMUSG00000032374,<br>ENSMUSG00000029368, ENSMUSG00000022546,<br>ENSMUSG00000025270, ENSMUSG00000004885,<br>ENSMUSG00000024039, ENSMUSG00000020182,<br>ENSMUSG00000046402, ENSMUSG00000025815,<br>ENSMUSG00000026621, ENSMUSG00000032454,<br>ENSMUSG00000024990, ENSMUSG00000028996,<br>ENSMUSG00000035540, ENSMUSG00000032291,<br>ENSMUSG00000024892, ENSMUSG00000025153,<br>ENSMUSG00000040808, ENSMUSG00000057880,<br>ENSMUSG00000020532, ENSMUSG00000002769                                            |
| GO:<br>0005<br>506 | iron ion binding | 1 | 9 | ENSMUSG0000003484, ENSMUSG00000026822,<br>ENSMUSG00000039519, ENSMUSG00000012428,<br>ENSMUSG00000050370, ENSMUSG00000003555,<br>ENSMUSG00000030895, ENSMUSG00000018907,<br>ENSMUSG00000031551 | 0.000177257 | 25<br>ENSMUSG0000006675, ENSMUSG0000003053,<br>ENSMUSG00000032374, ENSMUSG00000074254,<br>ENSMUSG00000066072, ENSMUSG00000025889,<br>ENSMUSG00000052974, ENSMUSG00000024039,<br>ENSMUSG00000018893, ENSMUSG00000090639,<br>ENSMUSG00000032554, ENSMUSG00000032315,<br>ENSMUSG00000032310, ENSMUSG00000006373,<br>ENSMUSG00000052217, ENSMUSG00000032807,<br>ENSMUSG00000028356, ENSMUSG00000075217,<br>ENSMUSG00000037071, ENSMUSG00000021032,<br>ENSMUSG00000029361, ENSMUSG00000066071,<br>ENSMUSG00000052187, ENSMUSG00000055609, |

|                    |                           |          |    |                                                                                                                                                                                                                                                                                                                                                                                                                                                                                                                                                                                                                                                                                                                                                        |             |    |                                                                                                                                                                                                |
|--------------------|---------------------------|----------|----|--------------------------------------------------------------------------------------------------------------------------------------------------------------------------------------------------------------------------------------------------------------------------------------------------------------------------------------------------------------------------------------------------------------------------------------------------------------------------------------------------------------------------------------------------------------------------------------------------------------------------------------------------------------------------------------------------------------------------------------------------------|-------------|----|------------------------------------------------------------------------------------------------------------------------------------------------------------------------------------------------|
|                    |                           |          |    |                                                                                                                                                                                                                                                                                                                                                                                                                                                                                                                                                                                                                                                                                                                                                        |             |    | ENSMUSG00000073424                                                                                                                                                                             |
| GO:<br>0019<br>825 | oxygen binding            | 1        | 0  |                                                                                                                                                                                                                                                                                                                                                                                                                                                                                                                                                                                                                                                                                                                                                        | 0.004721382 | 6  | ENSMUSG00000021032, ENSMUSG00000052974,<br>ENSMUSG00000052187, ENSMUSG00000055609,<br>ENSMUSG00000018893, ENSMUSG00000052217                                                                   |
| GO:<br>0005<br>126 | cytokine receptor binding | 3.07E-11 | 34 | ENSMUSG00000058755, ENSMUSG00000035352,<br>ENSMUSG00000058427, ENSMUSG00000029379,<br>ENSMUSG00000071005, ENSMUSG00000009185,<br>ENSMUSG00000046845, ENSMUSG00000016529,<br>ENSMUSG00000035385, ENSMUSG00000026166,<br>ENSMUSG00000028072, ENSMUSG00000018930,<br>ENSMUSG00000000817, ENSMUSG00000027398,<br>ENSMUSG00000034855, ENSMUSG00000028362,<br>ENSMUSG00000044701, ENSMUSG00000018920,<br>ENSMUSG00000055170, ENSMUSG00000045322,<br>ENSMUSG00000026104, ENSMUSG00000035042,<br>ENSMUSG00000026573, ENSMUSG00000035373,<br>ENSMUSG00000004296, ENSMUSG00000000982,<br>ENSMUSG00000026981, ENSMUSG00000029371,<br>ENSMUSG00000023078, ENSMUSG00000034394,<br>ENSMUSG00000024401, ENSMUSG00000048806,<br>ENSMUSG00000025746, ENSMUSG00000029380 | 1           | 9  | ENSMUSG00000031380, ENSMUSG00000026984,<br>ENSMUSG00000031780, ENSMUSG00000036867,<br>ENSMUSG00000023235, ENSMUSG00000026983,<br>ENSMUSG00000024028, ENSMUSG00000059327,<br>ENSMUSG00000032491 |
| GO:<br>0019<br>841 | retinol binding           | 1        | 0  |                                                                                                                                                                                                                                                                                                                                                                                                                                                                                                                                                                                                                                                                                                                                                        | 0.000805435 | 6  | ENSMUSG00000046402, ENSMUSG00000028996,<br>ENSMUSG00000024990, ENSMUSG00000004885,<br>ENSMUSG00000032454, ENSMUSG00000032291                                                                   |
| GO:<br>0004        | carboxylesterase activity | 1        | 0  |                                                                                                                                                                                                                                                                                                                                                                                                                                                                                                                                                                                                                                                                                                                                                        | 0.001799642 | 11 | ENSMUSG00000031725, ENSMUSG00000062826,<br>ENSMUSG00000074156, ENSMUSG00000023328,                                                                                                             |

|                    |                                  |                 |    |                                                                                                                                                                                                                                                                                                                                                                                                                                          |             |    |                                                                                                                                                                                                                                                                                                                                                                                                                                                                                                                                 |
|--------------------|----------------------------------|-----------------|----|------------------------------------------------------------------------------------------------------------------------------------------------------------------------------------------------------------------------------------------------------------------------------------------------------------------------------------------------------------------------------------------------------------------------------------------|-------------|----|---------------------------------------------------------------------------------------------------------------------------------------------------------------------------------------------------------------------------------------------------------------------------------------------------------------------------------------------------------------------------------------------------------------------------------------------------------------------------------------------------------------------------------|
| 091                |                                  |                 |    |                                                                                                                                                                                                                                                                                                                                                                                                                                          |             |    | ENSMUSG00000031877, ENSMUSG00000071047,<br>ENSMUSG00000078964, ENSMUSG00000061959,<br>ENSMUSG00000057074, ENSMUSG00000031886,<br>ENSMUSG00000050097                                                                                                                                                                                                                                                                                                                                                                             |
| GO:<br>0008<br>009 | chemokine activity               | 3.14E-13        | 17 | ENSMUSG00000018920, ENSMUSG00000035352,<br>ENSMUSG00000058427, ENSMUSG00000029379,<br>ENSMUSG00000035042, ENSMUSG00000071005,<br>ENSMUSG00000009185, ENSMUSG00000026573,<br>ENSMUSG00000035373, ENSMUSG00000035385,<br>ENSMUSG00000000982, ENSMUSG00000023078,<br>ENSMUSG00000029371, ENSMUSG00000026166,<br>ENSMUSG00000018930, ENSMUSG00000029380,<br>ENSMUSG00000034855                                                               | 1           | 2  | ENSMUSG00000031780, ENSMUSG00000023235                                                                                                                                                                                                                                                                                                                                                                                                                                                                                          |
| GO:<br>0004<br>866 | endopeptidase inhibitor activity | 0.00308741<br>8 | 20 | ENSMUSG00000017716, ENSMUSG00000074148,<br>ENSMUSG00000029664, ENSMUSG00000066363,<br>ENSMUSG00000021403, ENSMUSG00000041481,<br>ENSMUSG00000059657, ENSMUSG00000068129,<br>ENSMUSG00000041536, ENSMUSG0000001131,<br>ENSMUSG00000020415, ENSMUSG00000058207,<br>ENSMUSG00000079597, ENSMUSG00000079012,<br>ENSMUSG00000061947, ENSMUSG00000066364,<br>ENSMUSG00000021091, ENSMUSG00000030111,<br>ENSMUSG00000066361, ENSMUSG00000051949 | 4.04E-05    | 24 | ENSMUSG00000025860, ENSMUSG00000022868,<br>ENSMUSG00000025889, ENSMUSG00000073602,<br>ENSMUSG00000026715, ENSMUSG00000044594,<br>ENSMUSG00000058017, ENSMUSG00000039278,<br>ENSMUSG00000026874, ENSMUSG00000059956,<br>ENSMUSG00000067006, ENSMUSG00000023336,<br>ENSMUSG00000031760, ENSMUSG00000026327,<br>ENSMUSG00000028356, ENSMUSG00000030359,<br>ENSMUSG00000058260, ENSMUSG00000055561,<br>ENSMUSG00000022871, ENSMUSG00000019278,<br>ENSMUSG00000070531, ENSMUSG00000073601,<br>ENSMUSG00000027442, ENSMUSG00000031980 |
| GO:                | oxidoreductase activity          | 1               | 14 | ENSMUSG00000003484, ENSMUSG00000039519,                                                                                                                                                                                                                                                                                                                                                                                                  | 0.002496295 | 55 | ENSMUSG00000006675, ENSMUSG00000003053,                                                                                                                                                                                                                                                                                                                                                                                                                                                                                         |

0016

491

ENSMUSG00000032322, ENSMUSG00000024529,  
ENSMUSG00000012428, ENSMUSG00000003617,  
ENSMUSG00000050370, ENSMUSG00000005667,  
ENSMUSG00000020649, ENSMUSG00000029811,  
ENSMUSG00000003555, ENSMUSG00000018907,  
ENSMUSG00000031891, ENSMUSG00000031551

ENSMUSG00000032263, ENSMUSG00000025488,  
ENSMUSG00000074254, ENSMUSG00000091867,  
ENSMUSG00000025889, ENSMUSG00000068083,  
ENSMUSG00000040147, ENSMUSG00000031844,  
ENSMUSG0000002010, ENSMUSG00000031209,  
ENSMUSG00000032310, ENSMUSG00000025037,  
ENSMUSG00000032418, ENSMUSG00000005547,  
ENSMUSG00000032807, ENSMUSG00000032279,  
ENSMUSG00000025150, ENSMUSG00000019102,  
ENSMUSG00000026691, ENSMUSG00000037071,  
ENSMUSG00000071019, ENSMUSG00000031379,  
ENSMUSG00000074218, ENSMUSG00000029361,  
ENSMUSG00000066071, ENSMUSG00000025202,  
ENSMUSG00000025153, ENSMUSG00000073424,  
ENSMUSG00000078597, ENSMUSG00000032314,  
ENSMUSG00000032374, ENSMUSG00000066072,  
ENSMUSG00000052974, ENSMUSG00000023019,  
ENSMUSG00000019326, ENSMUSG00000040181,  
ENSMUSG00000031299, ENSMUSG00000025815,  
ENSMUSG00000026621, ENSMUSG00000032315,  
ENSMUSG00000000889, ENSMUSG00000030785,  
ENSMUSG00000090150, ENSMUSG00000052131,  
ENSMUSG00000040127, ENSMUSG00000075217,  
ENSMUSG00000028167, ENSMUSG00000033044,  
ENSMUSG00000064294, ENSMUSG00000025260,  
ENSMUSG00000029695, ENSMUSG00000050195,

|                    |                                              |                 |    |                                                                                                                                                                                                                                                                                                                                                                                                                       |             |    |                                                                                                                                                                                                                                                                |
|--------------------|----------------------------------------------|-----------------|----|-----------------------------------------------------------------------------------------------------------------------------------------------------------------------------------------------------------------------------------------------------------------------------------------------------------------------------------------------------------------------------------------------------------------------|-------------|----|----------------------------------------------------------------------------------------------------------------------------------------------------------------------------------------------------------------------------------------------------------------|
|                    |                                              |                 |    |                                                                                                                                                                                                                                                                                                                                                                                                                       |             |    | ENSMUSG00000027380                                                                                                                                                                                                                                             |
| GO:<br>0031<br>014 | troponin T binding                           | 1               | 0  |                                                                                                                                                                                                                                                                                                                                                                                                                       | 5.22E-05    | 5  | ENSMUSG00000031097, ENSMUSG00000091898,<br>ENSMUSG00000064179, ENSMUSG00000035458,<br>ENSMUSG00000021909                                                                                                                                                       |
| GO:<br>0004<br>252 | serine-type endopeptidase activity           | 0.00235589<br>8 | 19 | ENSMUSG00000066513, ENSMUSG00000005800,<br>ENSMUSG00000092005, ENSMUSG00000031444,<br>ENSMUSG00000024371, ENSMUSG00000024124,<br>ENSMUSG00000015437, ENSMUSG00000079186,<br>ENSMUSG00000000392, ENSMUSG00000079451,<br>ENSMUSG00000055172, ENSMUSG00000042385,<br>ENSMUSG00000023132, ENSMUSG00000063903,<br>ENSMUSG00000045027, ENSMUSG00000022622,<br>ENSMUSG00000090231, ENSMUSG00000063177,<br>ENSMUSG00000066512 | 1           | 7  | ENSMUSG00000059481, ENSMUSG00000061068,<br>ENSMUSG00000050762, ENSMUSG00000024386,<br>ENSMUSG00000030713, ENSMUSG00000061780,<br>ENSMUSG00000061259                                                                                                            |
| GO:<br>0019<br>955 | cytokine binding                             | 0.00237696<br>9 | 11 | ENSMUSG00000068227, ENSMUSG00000050232,<br>ENSMUSG00000070427, ENSMUSG00000025804,<br>ENSMUSG00000049103, ENSMUSG00000079227,<br>ENSMUSG00000030111, ENSMUSG0000004296,<br>ENSMUSG00000000791, ENSMUSG00000026770,<br>ENSMUSG00000037872                                                                                                                                                                              | 1           | 3  | ENSMUSG00000040488, ENSMUSG00000031146,<br>ENSMUSG00000010047                                                                                                                                                                                                  |
| GO:<br>0004<br>867 | serine-type endopeptidase inhibitor activity | 0.31252900<br>1 | 12 | ENSMUSG00000029664, ENSMUSG00000066363,<br>ENSMUSG00000058207, ENSMUSG00000021403,<br>ENSMUSG00000079012, ENSMUSG00000041481,<br>ENSMUSG00000061947, ENSMUSG00000066364,<br>ENSMUSG00000021091, ENSMUSG00000030111,<br>ENSMUSG00000066361, ENSMUSG00000041536                                                                                                                                                         | 0.002734701 | 16 | ENSMUSG00000073602, ENSMUSG00000026715,<br>ENSMUSG00000044594, ENSMUSG00000058017,<br>ENSMUSG00000039278, ENSMUSG00000059956,<br>ENSMUSG00000067006, ENSMUSG00000023336,<br>ENSMUSG00000026327, ENSMUSG00000058260,<br>ENSMUSG00000030359, ENSMUSG00000028356, |

|                    |                                 |                 |    |                                                                                                                                                                                                                                                                                                                                                                                                                                                                                                                                                        |             |    |                                                                                                                                                                                                                                                                                                                                                                                                                                           |
|--------------------|---------------------------------|-----------------|----|--------------------------------------------------------------------------------------------------------------------------------------------------------------------------------------------------------------------------------------------------------------------------------------------------------------------------------------------------------------------------------------------------------------------------------------------------------------------------------------------------------------------------------------------------------|-------------|----|-------------------------------------------------------------------------------------------------------------------------------------------------------------------------------------------------------------------------------------------------------------------------------------------------------------------------------------------------------------------------------------------------------------------------------------------|
|                    |                                 |                 |    |                                                                                                                                                                                                                                                                                                                                                                                                                                                                                                                                                        |             |    | ENSMUSG00000055561, ENSMUSG00000073601,<br>ENSMUSG00000070531, ENSMUSG00000031980                                                                                                                                                                                                                                                                                                                                                         |
| GO:<br>0005<br>529 | sugar binding                   | 0.00048289<br>3 | 25 | ENSMUSG00000030142, ENSMUSG00000030154,<br>ENSMUSG00000027322, ENSMUSG00000030017,<br>ENSMUSG00000038209, ENSMUSG00000043832,<br>ENSMUSG00000030149, ENSMUSG00000053063,<br>ENSMUSG00000030474, ENSMUSG00000026582,<br>ENSMUSG00000030148, ENSMUSG00000049037,<br>ENSMUSG00000079298, ENSMUSG00000029915,<br>ENSMUSG00000030365, ENSMUSG00000030147,<br>ENSMUSG00000021614, ENSMUSG00000022622,<br>ENSMUSG00000001123, ENSMUSG00000026580,<br>ENSMUSG00000067610, ENSMUSG00000030144,<br>ENSMUSG00000030187, ENSMUSG00000030156,<br>ENSMUSG00000059639 | 0.303646109 | 20 | ENSMUSG00000039013, ENSMUSG00000079168,<br>ENSMUSG00000004892, ENSMUSG00000031495,<br>ENSMUSG00000034783, ENSMUSG00000040165,<br>ENSMUSG00000020884, ENSMUSG00000024972,<br>ENSMUSG00000030607, ENSMUSG00000025271,<br>ENSMUSG00000031494, ENSMUSG00000025784,<br>ENSMUSG00000074491, ENSMUSG00000046834,<br>ENSMUSG00000030244, ENSMUSG00000051906,<br>ENSMUSG00000036655, ENSMUSG00000053522,<br>ENSMUSG00000022878, ENSMUSG00000028307 |
| GO:<br>0031<br>726 | CCR1 chemokine receptor binding | 0.00419401<br>5 | 4  | ENSMUSG00000035373, ENSMUSG00000018930,<br>ENSMUSG00000000982, ENSMUSG00000035042                                                                                                                                                                                                                                                                                                                                                                                                                                                                      | 1           | 0  |                                                                                                                                                                                                                                                                                                                                                                                                                                           |
| GO:<br>0048<br>020 | CCR chemokine receptor binding  | 2.33E-06        | 9  | ENSMUSG00000023078, ENSMUSG00000035352,<br>ENSMUSG00000026104, ENSMUSG00000018930,<br>ENSMUSG00000035042, ENSMUSG00000071005,<br>ENSMUSG00000035373, ENSMUSG00000035385,<br>ENSMUSG00000000982                                                                                                                                                                                                                                                                                                                                                         | 1           | 2  | ENSMUSG00000031780, ENSMUSG00000023235                                                                                                                                                                                                                                                                                                                                                                                                    |
| GO:<br>0042<br>379 | chemokine receptor binding      | 3.72E-12        | 18 | ENSMUSG00000018920, ENSMUSG00000035352,<br>ENSMUSG00000026104, ENSMUSG00000058427,<br>ENSMUSG00000029379, ENSMUSG00000035042,                                                                                                                                                                                                                                                                                                                                                                                                                          | 1           | 3  | ENSMUSG00000031780, ENSMUSG00000023235,<br>ENSMUSG00000024028                                                                                                                                                                                                                                                                                                                                                                             |

|                    |                      |          |    |                                                                                                                                                                                                                                                               |             |    |                                                                                                                                                                                                                                                                                                                                                                                                                                                                                                                                                                                                                                                                                                                                                                                                                         |
|--------------------|----------------------|----------|----|---------------------------------------------------------------------------------------------------------------------------------------------------------------------------------------------------------------------------------------------------------------|-------------|----|-------------------------------------------------------------------------------------------------------------------------------------------------------------------------------------------------------------------------------------------------------------------------------------------------------------------------------------------------------------------------------------------------------------------------------------------------------------------------------------------------------------------------------------------------------------------------------------------------------------------------------------------------------------------------------------------------------------------------------------------------------------------------------------------------------------------------|
|                    |                      |          |    | ENSMUSG00000071005, ENSMUSG00000009185,<br>ENSMUSG00000026573, ENSMUSG00000035373,<br>ENSMUSG00000035385, ENSMUSG00000000982,<br>ENSMUSG00000023078, ENSMUSG00000029371,<br>ENSMUSG00000026166, ENSMUSG00000018930,<br>ENSMUSG00000029380, ENSMUSG00000034855 |             |    |                                                                                                                                                                                                                                                                                                                                                                                                                                                                                                                                                                                                                                                                                                                                                                                                                         |
| GO:<br>0003<br>779 | actin binding        | 1        | 5  | ENSMUSG00000024397, ENSMUSG00000022534,<br>ENSMUSG00000079227, ENSMUSG00000022021,<br>ENSMUSG00000032322                                                                                                                                                      | 2.68E-06    | 37 | ENSMUSG00000068270, ENSMUSG00000032366,<br>ENSMUSG00000055775, ENSMUSG00000033196,<br>ENSMUSG00000057003, ENSMUSG00000039952,<br>ENSMUSG00000033577, ENSMUSG00000021909,<br>ENSMUSG0000006457, ENSMUSG00000052698,<br>ENSMUSG00000027022, ENSMUSG00000056328,<br>ENSMUSG00000061086, ENSMUSG00000066574,<br>ENSMUSG00000032064, ENSMUSG00000060180,<br>ENSMUSG00000001349, ENSMUSG00000026532,<br>ENSMUSG00000040752, ENSMUSG00000035458,<br>ENSMUSG00000031214, ENSMUSG00000089996,<br>ENSMUSG00000091898, ENSMUSG00000053093,<br>ENSMUSG00000023013, ENSMUSG00000031097,<br>ENSMUSG00000033763, ENSMUSG00000039585,<br>ENSMUSG00000045103, ENSMUSG00000035540,<br>ENSMUSG00000038775, ENSMUSG00000024471,<br>ENSMUSG00000059741, ENSMUSG00000041729,<br>ENSMUSG00000026418, ENSMUSG00000052374,<br>ENSMUSG00000049493 |
| GO:                | carbohydrate binding | 8.22E-06 | 40 | ENSMUSG00000027832, ENSMUSG00000027995,                                                                                                                                                                                                                       | 0.005484143 | 35 | ENSMUSG00000039013, ENSMUSG00000025810,                                                                                                                                                                                                                                                                                                                                                                                                                                                                                                                                                                                                                                                                                                                                                                                 |

|                    |                     |   |    |                                                                                                                                                                                                                                                                                                                                                                                                                                                                                                                                                                                                                                                                                                                                                                                                                                                                                        |          |    |                                                                                                                                                                                                                                                                                                                                                                                                                                                                                                                                                                                                                                                                                                                                                                          |
|--------------------|---------------------|---|----|----------------------------------------------------------------------------------------------------------------------------------------------------------------------------------------------------------------------------------------------------------------------------------------------------------------------------------------------------------------------------------------------------------------------------------------------------------------------------------------------------------------------------------------------------------------------------------------------------------------------------------------------------------------------------------------------------------------------------------------------------------------------------------------------------------------------------------------------------------------------------------------|----------|----|--------------------------------------------------------------------------------------------------------------------------------------------------------------------------------------------------------------------------------------------------------------------------------------------------------------------------------------------------------------------------------------------------------------------------------------------------------------------------------------------------------------------------------------------------------------------------------------------------------------------------------------------------------------------------------------------------------------------------------------------------------------------------|
| 0030<br>246        |                     |   |    | <p>ENSMUSG00000030017, ENSMUSG00000009185,<br/> ENSMUSG00000038209, ENSMUSG00000043832,<br/> ENSMUSG00000029811, ENSMUSG00000079563,<br/> ENSMUSG00000035385, ENSMUSG00000053063,<br/> ENSMUSG00000030413, ENSMUSG00000030148,<br/> ENSMUSG00000049037, ENSMUSG00000029915,<br/> ENSMUSG00000030786, ENSMUSG00000030365,<br/> ENSMUSG0000001123, ENSMUSG00000030144,<br/> ENSMUSG00000029816, ENSMUSG00000030156,<br/> ENSMUSG00000059639, ENSMUSG00000030154,<br/> ENSMUSG00000030142, ENSMUSG00000027322,<br/> ENSMUSG00000020330, ENSMUSG00000055994,<br/> ENSMUSG00000035042, ENSMUSG00000053475,<br/> ENSMUSG00000030149, ENSMUSG00000035373,<br/> ENSMUSG00000030474, ENSMUSG00000023078,<br/> ENSMUSG00000026582, ENSMUSG00000079298,<br/> ENSMUSG00000021614, ENSMUSG00000030147,<br/> ENSMUSG00000022622, ENSMUSG00000026580,<br/> ENSMUSG00000067610, ENSMUSG00000030187</p> |          |    | <p>ENSMUSG00000033327, ENSMUSG00000031495,<br/> ENSMUSG00000039269, ENSMUSG00000034783,<br/> ENSMUSG00000026715, ENSMUSG00000020884,<br/> ENSMUSG00000024972, ENSMUSG00000030607,<br/> ENSMUSG00000031996, ENSMUSG00000025784,<br/> ENSMUSG00000046834, ENSMUSG00000057606,<br/> ENSMUSG00000030244, ENSMUSG00000036655,<br/> ENSMUSG00000015354, ENSMUSG00000022878,<br/> ENSMUSG00000053522, ENSMUSG00000079168,<br/> ENSMUSG0000004892, ENSMUSG00000040165,<br/> ENSMUSG00000061068, ENSMUSG00000001494,<br/> ENSMUSG00000035459, ENSMUSG00000000049,<br/> ENSMUSG00000025271, ENSMUSG00000030606,<br/> ENSMUSG00000048758, ENSMUSG00000062778,<br/> ENSMUSG00000031494, ENSMUSG00000074491,<br/> ENSMUSG00000051906, ENSMUSG00000028307,<br/> ENSMUSG00000010047</p> |
| GO:<br>0005<br>509 | calcium ion binding | 1 | 18 | <p>ENSMUSG00000005800, ENSMUSG000000092005,<br/> ENSMUSG00000031444, ENSMUSG00000050578,<br/> ENSMUSG00000029811, ENSMUSG00000024857,<br/> ENSMUSG00000037202, ENSMUSG00000028613,<br/> ENSMUSG00000055172, ENSMUSG00000030218,<br/> ENSMUSG00000023903, ENSMUSG00000028751,<br/> ENSMUSG00000024842, ENSMUSG00000028217,</p>                                                                                                                                                                                                                                                                                                                                                                                                                                                                                                                                                          | 1.34E-06 | 51 | <p>ENSMUSG00000006675, ENSMUSG00000030302,<br/> ENSMUSG00000030730, ENSMUSG00000032452,<br/> ENSMUSG00000040488, ENSMUSG00000025889,<br/> ENSMUSG00000031312, ENSMUSG00000074505,<br/> ENSMUSG00000007122, ENSMUSG00000008153,<br/> ENSMUSG00000061928, ENSMUSG00000031881,<br/> ENSMUSG00000031841, ENSMUSG0000002588,</p>                                                                                                                                                                                                                                                                                                                                                                                                                                              |



|                           |                             |          |     |                                                                                   |          |    |                                                                                                                                                                                                                                                                                                                                                                                                                                                                                                                                                                                                                                                                                                                                                                                                                          |
|---------------------------|-----------------------------|----------|-----|-----------------------------------------------------------------------------------|----------|----|--------------------------------------------------------------------------------------------------------------------------------------------------------------------------------------------------------------------------------------------------------------------------------------------------------------------------------------------------------------------------------------------------------------------------------------------------------------------------------------------------------------------------------------------------------------------------------------------------------------------------------------------------------------------------------------------------------------------------------------------------------------------------------------------------------------------------|
|                           |                             |          |     | ENSMUSG00000024397, ENSMUSG00000030156,<br>ENSMUSG00000025473, ENSMUSG00000035683 |          |    | ENSMUSG00000059898, ENSMUSG00000039952,<br>ENSMUSG00000030672, ENSMUSG00000032320,<br>ENSMUSG00000021909, ENSMUSG00000006457,<br>ENSMUSG00000030607, ENSMUSG00000033208,<br>ENSMUSG00000017300, ENSMUSG00000061816,<br>ENSMUSG00000005716, ENSMUSG00000027401,<br>ENSMUSG00000025784, ENSMUSG00000024386,<br>ENSMUSG00000044322, ENSMUSG00000033765,<br>ENSMUSG00000020469, ENSMUSG00000026532,<br>ENSMUSG00000019326, ENSMUSG00000032570,<br>ENSMUSG00000056632, ENSMUSG00000091898,<br>ENSMUSG00000025991, ENSMUSG00000040855,<br>ENSMUSG00000014846, ENSMUSG00000046093,<br>ENSMUSG00000021573, ENSMUSG00000032246,<br>ENSMUSG00000037493, ENSMUSG00000063130,<br>ENSMUSG00000069441, ENSMUSG00000059741,<br>ENSMUSG00000052374, ENSMUSG00000055632,<br>ENSMUSG00000049493, ENSMUSG00000040808,<br>ENSMUSG00000034774 |
| GO:<br>0005<br>344        | oxygen transporter activity | 1        | 0   |                                                                                   | 1.24E-09 | 9  | ENSMUSG00000020295, ENSMUSG00000073063,<br>ENSMUSG00000078621, ENSMUSG00000018893,<br>ENSMUSG00000021032, ENSMUSG00000055609,<br>ENSMUSG00000052305, ENSMUSG00000052187,<br>ENSMUSG00000052217                                                                                                                                                                                                                                                                                                                                                                                                                                                                                                                                                                                                                           |
| <b>Cellular Component</b> |                             |          |     |                                                                                   |          |    |                                                                                                                                                                                                                                                                                                                                                                                                                                                                                                                                                                                                                                                                                                                                                                                                                          |
| GO:                       | extracellular region part   | 1.53E-17 | 102 | ENSMUSG00000060802, ENSMUSG00000058755,                                           | 3.29E-08 | 84 | ENSMUSG00000033327, ENSMUSG00000025889,                                                                                                                                                                                                                                                                                                                                                                                                                                                                                                                                                                                                                                                                                                                                                                                  |

|             |  |  |                                                                                                                                                                                                                                                                                                                                                                                                                                                                                                                                                                                                                                                                                                                                                                                                                                                                                                                                                                                                                                                                                                                                                       |  |                                                                                                                                                                                                                                                                                                                                                                                                                                                                                                                                                                                                                                                                                                                                                                                                                                                                                                                                                                                                                                                                                                                                                          |
|-------------|--|--|-------------------------------------------------------------------------------------------------------------------------------------------------------------------------------------------------------------------------------------------------------------------------------------------------------------------------------------------------------------------------------------------------------------------------------------------------------------------------------------------------------------------------------------------------------------------------------------------------------------------------------------------------------------------------------------------------------------------------------------------------------------------------------------------------------------------------------------------------------------------------------------------------------------------------------------------------------------------------------------------------------------------------------------------------------------------------------------------------------------------------------------------------------|--|----------------------------------------------------------------------------------------------------------------------------------------------------------------------------------------------------------------------------------------------------------------------------------------------------------------------------------------------------------------------------------------------------------------------------------------------------------------------------------------------------------------------------------------------------------------------------------------------------------------------------------------------------------------------------------------------------------------------------------------------------------------------------------------------------------------------------------------------------------------------------------------------------------------------------------------------------------------------------------------------------------------------------------------------------------------------------------------------------------------------------------------------------------|
| 0044<br>421 |  |  | ENSMUSG00000022026, ENSMUSG00000036887,<br>ENSMUSG00000009185, ENSMUSG00000024989,<br>ENSMUSG00000003617, ENSMUSG00000016529,<br>ENSMUSG00000028613, ENSMUSG00000000392,<br>ENSMUSG00000018930, ENSMUSG00000000817,<br>ENSMUSG00000036896, ENSMUSG00000040253,<br>ENSMUSG00000020053, ENSMUSG00000030895,<br>ENSMUSG00000021091, ENSMUSG0000000182,<br>ENSMUSG00000054072, ENSMUSG00000037321,<br>ENSMUSG00000034855, ENSMUSG00000079019,<br>ENSMUSG00000044701, ENSMUSG00000018920,<br>ENSMUSG00000069874, ENSMUSG00000079362,<br>ENSMUSG0000006403, ENSMUSG00000070427,<br>ENSMUSG0000005800, ENSMUSG0000002992,<br>ENSMUSG00000035493, ENSMUSG00000022548,<br>ENSMUSG00000050578, ENSMUSG00000028270,<br>ENSMUSG00000035373, ENSMUSG00000038357,<br>ENSMUSG00000000982, ENSMUSG00000057465,<br>ENSMUSG00000029304, ENSMUSG00000038067,<br>ENSMUSG00000030218, ENSMUSG00000023913,<br>ENSMUSG0000001131, ENSMUSG00000026582,<br>ENSMUSG00000079620, ENSMUSG00000028268,<br>ENSMUSG00000021614, ENSMUSG00000048806,<br>ENSMUSG00000029380, ENSMUSG00000021451,<br>ENSMUSG00000025044, ENSMUSG00000036905,<br>ENSMUSG00000035352, ENSMUSG00000026822, |  | ENSMUSG00000039269, ENSMUSG00000023328,<br>ENSMUSG00000031274, ENSMUSG00000026715,<br>ENSMUSG0000002588, ENSMUSG00000039952,<br>ENSMUSG00000044820, ENSMUSG00000090639,<br>ENSMUSG00000026983, ENSMUSG00000043719,<br>ENSMUSG00000039278, ENSMUSG00000026874,<br>ENSMUSG00000032332, ENSMUSG00000039004,<br>ENSMUSG00000033208, ENSMUSG00000026668,<br>ENSMUSG00000010051, ENSMUSG00000022871,<br>ENSMUSG00000017697, ENSMUSG00000057606,<br>ENSMUSG00000061808, ENSMUSG00000037010,<br>ENSMUSG00000036655, ENSMUSG00000022878,<br>ENSMUSG00000091345, ENSMUSG00000027376,<br>ENSMUSG0000004892, ENSMUSG00000059201,<br>ENSMUSG00000022868, ENSMUSG00000026984,<br>ENSMUSG00000064057, ENSMUSG00000033544,<br>ENSMUSG00000001494, ENSMUSG00000059327,<br>ENSMUSG00000000049, ENSMUSG00000024990,<br>ENSMUSG00000032083, ENSMUSG00000015405,<br>ENSMUSG00000031780, ENSMUSG00000059481,<br>ENSMUSG00000054196, ENSMUSG00000055632,<br>ENSMUSG00000031980, ENSMUSG00000031380,<br>ENSMUSG00000031134, ENSMUSG00000040488,<br>ENSMUSG00000012705, ENSMUSG00000029368,<br>ENSMUSG00000033831, ENSMUSG00000061780,<br>ENSMUSG00000052911, ENSMUSG00000031841, |
|-------------|--|--|-------------------------------------------------------------------------------------------------------------------------------------------------------------------------------------------------------------------------------------------------------------------------------------------------------------------------------------------------------------------------------------------------------------------------------------------------------------------------------------------------------------------------------------------------------------------------------------------------------------------------------------------------------------------------------------------------------------------------------------------------------------------------------------------------------------------------------------------------------------------------------------------------------------------------------------------------------------------------------------------------------------------------------------------------------------------------------------------------------------------------------------------------------|--|----------------------------------------------------------------------------------------------------------------------------------------------------------------------------------------------------------------------------------------------------------------------------------------------------------------------------------------------------------------------------------------------------------------------------------------------------------------------------------------------------------------------------------------------------------------------------------------------------------------------------------------------------------------------------------------------------------------------------------------------------------------------------------------------------------------------------------------------------------------------------------------------------------------------------------------------------------------------------------------------------------------------------------------------------------------------------------------------------------------------------------------------------------|

|             |                    |   |    |                                                                                                                                                                                                                                                                                                                                                                                                                                                                                                                                                                                                                                                                                                                                                                                                                                                                                                                                                                                                                                                                                                                         |          |    |                                                                                                                                                                                                                                                                                                                                                                                                                                                                                                                                                                                                                                                                                                     |
|-------------|--------------------|---|----|-------------------------------------------------------------------------------------------------------------------------------------------------------------------------------------------------------------------------------------------------------------------------------------------------------------------------------------------------------------------------------------------------------------------------------------------------------------------------------------------------------------------------------------------------------------------------------------------------------------------------------------------------------------------------------------------------------------------------------------------------------------------------------------------------------------------------------------------------------------------------------------------------------------------------------------------------------------------------------------------------------------------------------------------------------------------------------------------------------------------------|----------|----|-----------------------------------------------------------------------------------------------------------------------------------------------------------------------------------------------------------------------------------------------------------------------------------------------------------------------------------------------------------------------------------------------------------------------------------------------------------------------------------------------------------------------------------------------------------------------------------------------------------------------------------------------------------------------------------------------------|
|             |                    |   |    | <p>ENSMUSG00000058427, ENSMUSG00000029379,<br/> ENSMUSG00000060747, ENSMUSG00000029417,<br/> ENSMUSG00000037974, ENSMUSG00000046845,<br/> ENSMUSG00000024330, ENSMUSG00000047517,<br/> ENSMUSG00000029377, ENSMUSG00000029811,<br/> ENSMUSG00000029298, ENSMUSG00000051439,<br/> ENSMUSG00000074115, ENSMUSG00000029378,<br/> ENSMUSG00000035385, ENSMUSG00000040017,<br/> ENSMUSG00000033880, ENSMUSG00000026166,<br/> ENSMUSG00000030413, ENSMUSG00000027398,<br/> ENSMUSG00000030117, ENSMUSG00000034459,<br/> ENSMUSG00000028362, ENSMUSG00000041324,<br/> ENSMUSG00000055170, ENSMUSG00000028269,<br/> ENSMUSG00000039899, ENSMUSG00000035042,<br/> ENSMUSG00000030077, ENSMUSG00000026573,<br/> ENSMUSG00000033453, ENSMUSG0000004296,<br/> ENSMUSG00000076612, ENSMUSG00000026981,<br/> ENSMUSG00000040026, ENSMUSG00000018486,<br/> ENSMUSG00000023078, ENSMUSG00000029371,<br/> ENSMUSG00000034394, ENSMUSG00000024529,<br/> ENSMUSG00000024401, ENSMUSG00000036596,<br/> ENSMUSG00000090231, ENSMUSG00000024339,<br/> ENSMUSG00000026580, ENSMUSG00000025746,<br/> ENSMUSG00000030111, ENSMUSG00000020010</p> |          |    | <p>ENSMUSG00000041012, ENSMUSG00000021319,<br/> ENSMUSG00000032554, ENSMUSG00000024028,<br/> ENSMUSG00000018566, ENSMUSG00000030607,<br/> ENSMUSG00000041559, ENSMUSG00000023336,<br/> ENSMUSG00000005705, ENSMUSG00000020427,<br/> ENSMUSG00000022996, ENSMUSG00000030359,<br/> ENSMUSG00000074336, ENSMUSG00000025784,<br/> ENSMUSG00000024386, ENSMUSG00000029019,<br/> ENSMUSG00000040533, ENSMUSG00000074264,<br/> ENSMUSG00000055653, ENSMUSG00000019326,<br/> ENSMUSG00000023046, ENSMUSG00000032081,<br/> ENSMUSG00000030606, ENSMUSG00000024653,<br/> ENSMUSG00000035540, ENSMUSG00000062778,<br/> ENSMUSG00000058914, ENSMUSG00000060962,<br/> ENSMUSG00000023235, ENSMUSG00000071347</p> |
| GO:<br>0005 | insoluble fraction | 1 | 18 | <p>ENSMUSG00000003665, ENSMUSG00000031444,<br/> ENSMUSG00000030525, ENSMUSG00000041431,</p>                                                                                                                                                                                                                                                                                                                                                                                                                                                                                                                                                                                                                                                                                                                                                                                                                                                                                                                                                                                                                             | 1.23E-05 | 70 | <p>ENSMUSG00000030302, ENSMUSG00000032547,<br/> ENSMUSG00000074254, ENSMUSG00000025889,</p>                                                                                                                                                                                                                                                                                                                                                                                                                                                                                                                                                                                                         |

ENSMUSG0000003555, ENSMUSG00000026475,  
ENSMUSG00000031891, ENSMUSG00000031898,  
ENSMUSG00000030148, ENSMUSG00000036986,  
ENSMUSG00000039519, ENSMUSG00000024339,  
ENSMUSG00000026580, ENSMUSG00000041347,  
ENSMUSG00000041831, ENSMUSG00000037321,  
ENSMUSG00000023045, ENSMUSG00000032218

ENSMUSG00000070570, ENSMUSG00000007122,  
ENSMUSG00000040867, ENSMUSG00000027849,  
ENSMUSG00000020524, ENSMUSG00000002588,  
ENSMUSG00000039952, ENSMUSG00000013418,  
ENSMUSG00000032310, ENSMUSG00000031812,  
ENSMUSG00000028356, ENSMUSG00000010051,  
ENSMUSG00000037071, ENSMUSG00000038776,  
ENSMUSG00000032076, ENSMUSG00000078597,  
ENSMUSG00000004892, ENSMUSG00000066072,  
ENSMUSG00000052974, ENSMUSG00000032086,  
ENSMUSG00000040181, ENSMUSG00000059412,  
ENSMUSG00000032315, ENSMUSG00000047182,  
ENSMUSG00000027820, ENSMUSG00000044338,  
ENSMUSG00000032491, ENSMUSG00000023013,  
ENSMUSG00000015405, ENSMUSG00000030554,  
ENSMUSG00000059481, ENSMUSG00000050195,  
ENSMUSG00000030730, ENSMUSG00000003053,  
ENSMUSG00000024500, ENSMUSG00000055980,  
ENSMUSG00000052911, ENSMUSG00000057182,  
ENSMUSG00000031844, ENSMUSG00000006269,  
ENSMUSG00000033577, ENSMUSG00000001986,  
ENSMUSG00000018566, ENSMUSG00000033595,  
ENSMUSG00000036813, ENSMUSG00000031489,  
ENSMUSG00000026691, ENSMUSG00000048142,  
ENSMUSG00000032216, ENSMUSG00000032060,  
ENSMUSG00000030244, ENSMUSG00000066071,

|                    |                                  |          |    |                                                                                                                                                                                                                                                                                                                                                                                                                                                                                                                                                                                                                                                                                                                                                                                                                                               |   |    |                                                                                                                                                                                                                                                                                                          |
|--------------------|----------------------------------|----------|----|-----------------------------------------------------------------------------------------------------------------------------------------------------------------------------------------------------------------------------------------------------------------------------------------------------------------------------------------------------------------------------------------------------------------------------------------------------------------------------------------------------------------------------------------------------------------------------------------------------------------------------------------------------------------------------------------------------------------------------------------------------------------------------------------------------------------------------------------------|---|----|----------------------------------------------------------------------------------------------------------------------------------------------------------------------------------------------------------------------------------------------------------------------------------------------------------|
|                    |                                  |          |    |                                                                                                                                                                                                                                                                                                                                                                                                                                                                                                                                                                                                                                                                                                                                                                                                                                               |   |    | ENSMUSG00000029361, ENSMUSG00000073424,<br>ENSMUSG00000057880, ENSMUSG00000019326,<br>ENSMUSG00000032570, ENSMUSG00000007815,<br>ENSMUSG00000019478, ENSMUSG00000031144,<br>ENSMUSG00000045103, ENSMUSG00000048758,<br>ENSMUSG00000030747, ENSMUSG00000022206,<br>ENSMUSG00000028307, ENSMUSG00000012187 |
| GO:<br>0009<br>897 | external side of plasma membrane | 2.33E-17 | 46 | ENSMUSG00000060802, ENSMUSG00000027995,<br>ENSMUSG00000071005, ENSMUSG00000029417,<br>ENSMUSG00000061232, ENSMUSG00000053977,<br>ENSMUSG00000075602, ENSMUSG00000073411,<br>ENSMUSG00000050232, ENSMUSG00000000817,<br>ENSMUSG00000075122, ENSMUSG00000078452,<br>ENSMUSG00000030786, ENSMUSG00000030365,<br>ENSMUSG00000026011, ENSMUSG00000030167,<br>ENSMUSG00000026285, ENSMUSG00000025804,<br>ENSMUSG00000059089, ENSMUSG00000079227,<br>ENSMUSG00000030156, ENSMUSG00000034855,<br>ENSMUSG00000026770, ENSMUSG00000016496,<br>ENSMUSG00000055170, ENSMUSG00000028965,<br>ENSMUSG00000068227, ENSMUSG00000062082,<br>ENSMUSG00000058715, ENSMUSG00000030525,<br>ENSMUSG00000030149, ENSMUSG00000050896,<br>ENSMUSG00000000791, ENSMUSG00000015947,<br>ENSMUSG00000022901, ENSMUSG00000026656,<br>ENSMUSG00000050241, ENSMUSG00000029075, | 1 | 10 | ENSMUSG00000033831, ENSMUSG00000032034,<br>ENSMUSG00000017697, ENSMUSG00000059481,<br>ENSMUSG00000026824, ENSMUSG00000031841,<br>ENSMUSG00000035459, ENSMUSG00000041688,<br>ENSMUSG00000018566, ENSMUSG00000010047                                                                                       |

|                    |                     |          |    |                                                                                                                                                                                                                                           |          |    |                                                                                                                                                                                                                                                                                                                                                                                                                                                                                                                                                                                                                                                                                                              |
|--------------------|---------------------|----------|----|-------------------------------------------------------------------------------------------------------------------------------------------------------------------------------------------------------------------------------------------|----------|----|--------------------------------------------------------------------------------------------------------------------------------------------------------------------------------------------------------------------------------------------------------------------------------------------------------------------------------------------------------------------------------------------------------------------------------------------------------------------------------------------------------------------------------------------------------------------------------------------------------------------------------------------------------------------------------------------------------------|
|                    |                     |          |    | ENSMUSG00000030124, ENSMUSG00000079298,<br>ENSMUSG00000024401, ENSMUSG00000022582,<br>ENSMUSG00000026580, ENSMUSG00000025746,<br>ENSMUSG00000053219, ENSMUSG00000026009                                                                   |          |    |                                                                                                                                                                                                                                                                                                                                                                                                                                                                                                                                                                                                                                                                                                              |
| GO:<br>0044<br>216 | other organism cell | 1.79E-11 | 11 | ENSMUSG00000028269, ENSMUSG00000069874,<br>ENSMUSG00000079362, ENSMUSG00000028268,<br>ENSMUSG00000040253, ENSMUSG00000024339,<br>ENSMUSG00000028270, ENSMUSG00000029298,<br>ENSMUSG00000054072, ENSMUSG00000037321,<br>ENSMUSG00000034459 | 1        | 0  |                                                                                                                                                                                                                                                                                                                                                                                                                                                                                                                                                                                                                                                                                                              |
| GO:<br>0042<br>598 | vesicular fraction  | 1        | 7  | ENSMUSG00000024339, ENSMUSG00000003555,<br>ENSMUSG00000031891, ENSMUSG00000023045,<br>ENSMUSG00000037321, ENSMUSG00000039519,<br>ENSMUSG00000031444                                                                                       | 1.31E-07 | 36 | ENSMUSG00000030302, ENSMUSG00000003053,<br>ENSMUSG00000030730, ENSMUSG00000074254,<br>ENSMUSG00000025889, ENSMUSG00000055980,<br>ENSMUSG00000007122, ENSMUSG00000002588,<br>ENSMUSG00000031844, ENSMUSG00000033577,<br>ENSMUSG00000013418, ENSMUSG00000032310,<br>ENSMUSG00000018566, ENSMUSG00000028356,<br>ENSMUSG00000026691, ENSMUSG00000010051,<br>ENSMUSG00000048142, ENSMUSG00000037071,<br>ENSMUSG00000038776, ENSMUSG00000066071,<br>ENSMUSG00000073424, ENSMUSG00000078597,<br>ENSMUSG00000052974, ENSMUSG00000019326,<br>ENSMUSG00000066072, ENSMUSG00000032570,<br>ENSMUSG00000040181, ENSMUSG00000059412,<br>ENSMUSG00000032315, ENSMUSG00000047182,<br>ENSMUSG00000019478, ENSMUSG00000045103, |

|                    |                                           |          |    |                                                                                                                                                                                                                                                                                                                                                                                                |          |    |                                                                                                                                                                                                                                                                                                                                                                                                                       |
|--------------------|-------------------------------------------|----------|----|------------------------------------------------------------------------------------------------------------------------------------------------------------------------------------------------------------------------------------------------------------------------------------------------------------------------------------------------------------------------------------------------|----------|----|-----------------------------------------------------------------------------------------------------------------------------------------------------------------------------------------------------------------------------------------------------------------------------------------------------------------------------------------------------------------------------------------------------------------------|
|                    |                                           |          |    |                                                                                                                                                                                                                                                                                                                                                                                                |          |    | ENSMUSG00000030747, ENSMUSG00000059481,<br>ENSMUSG00000050195, ENSMUSG00000028307                                                                                                                                                                                                                                                                                                                                     |
| GO:<br>0031<br>674 | I band                                    | 1        | 0  |                                                                                                                                                                                                                                                                                                                                                                                                | 6.05E-08 | 19 | ENSMUSG00000030730, ENSMUSG00000031312,<br>ENSMUSG00000027077, ENSMUSG00000007122,<br>ENSMUSG00000053093, ENSMUSG00000025172,<br>ENSMUSG00000028116, ENSMUSG00000041361,<br>ENSMUSG00000092137, ENSMUSG00000045103,<br>ENSMUSG00000067653, ENSMUSG00000006574,<br>ENSMUSG00000030554, ENSMUSG00000059741,<br>ENSMUSG00000032060, ENSMUSG00000049173,<br>ENSMUSG00000007877, ENSMUSG00000052374,<br>ENSMUSG00000040752 |
| GO:<br>0000<br>940 | condensed chromosome outer<br>kinetochore | 3.00E-06 | 7  | ENSMUSG00000041431, ENSMUSG00000040084,<br>ENSMUSG00000024056, ENSMUSG00000036223,<br>ENSMUSG00000026605, ENSMUSG00000030867,<br>ENSMUSG00000069910                                                                                                                                                                                                                                            | 1        | 0  |                                                                                                                                                                                                                                                                                                                                                                                                                       |
| GO:<br>0000<br>793 | condensed chromosome                      | 6.24E-05 | 18 | ENSMUSG00000017716, ENSMUSG00000015880,<br>ENSMUSG00000024791, ENSMUSG00000045273,<br>ENSMUSG00000026039, ENSMUSG00000041431,<br>ENSMUSG00000040084, ENSMUSG00000036223,<br>ENSMUSG00000026605, ENSMUSG00000069910,<br>ENSMUSG00000045328, ENSMUSG00000031004,<br>ENSMUSG00000020897, ENSMUSG00000017146,<br>ENSMUSG00000030867, ENSMUSG00000027379,<br>ENSMUSG00000024056, ENSMUSG00000023940 | 1        | 0  |                                                                                                                                                                                                                                                                                                                                                                                                                       |
| GO:                | host cell                                 | 1.79E-11 | 11 | ENSMUSG00000028269, ENSMUSG00000069874,                                                                                                                                                                                                                                                                                                                                                        | 1        | 0  |                                                                                                                                                                                                                                                                                                                                                                                                                       |

|                    |                |   |   |                                                                                                                                                                                                |          |    |                                                                                                                                                                                                                                                                                                                                                                                                                                                                                                                                                                                                                                                                                                                                                                                                  |
|--------------------|----------------|---|---|------------------------------------------------------------------------------------------------------------------------------------------------------------------------------------------------|----------|----|--------------------------------------------------------------------------------------------------------------------------------------------------------------------------------------------------------------------------------------------------------------------------------------------------------------------------------------------------------------------------------------------------------------------------------------------------------------------------------------------------------------------------------------------------------------------------------------------------------------------------------------------------------------------------------------------------------------------------------------------------------------------------------------------------|
| 0043<br>657        |                |   |   | ENSMUSG00000079362, ENSMUSG00000028268,<br>ENSMUSG00000040253, ENSMUSG00000024339,<br>ENSMUSG00000028270, ENSMUSG00000029298,<br>ENSMUSG00000054072, ENSMUSG00000037321,<br>ENSMUSG00000034459 |          |    |                                                                                                                                                                                                                                                                                                                                                                                                                                                                                                                                                                                                                                                                                                                                                                                                  |
| GO:<br>0005<br>792 | microsome      | 1 | 7 | ENSMUSG00000024339, ENSMUSG0000003555,<br>ENSMUSG00000031891, ENSMUSG00000023045,<br>ENSMUSG00000037321, ENSMUSG00000039519,<br>ENSMUSG00000031444                                             | 4.64E-08 | 36 | ENSMUSG00000030302, ENSMUSG0000003053,<br>ENSMUSG00000030730, ENSMUSG00000074254,<br>ENSMUSG00000025889, ENSMUSG00000055980,<br>ENSMUSG00000007122, ENSMUSG00000002588,<br>ENSMUSG00000031844, ENSMUSG00000033577,<br>ENSMUSG00000013418, ENSMUSG00000032310,<br>ENSMUSG00000018566, ENSMUSG00000028356,<br>ENSMUSG00000026691, ENSMUSG00000010051,<br>ENSMUSG00000048142, ENSMUSG00000037071,<br>ENSMUSG00000038776, ENSMUSG00000066071,<br>ENSMUSG00000073424, ENSMUSG00000078597,<br>ENSMUSG00000052974, ENSMUSG00000019326,<br>ENSMUSG00000066072, ENSMUSG00000032570,<br>ENSMUSG00000040181, ENSMUSG00000059412,<br>ENSMUSG00000032315, ENSMUSG00000047182,<br>ENSMUSG00000019478, ENSMUSG00000045103,<br>ENSMUSG00000030747, ENSMUSG00000059481,<br>ENSMUSG00000050195, ENSMUSG00000028307 |
| GO:<br>0016<br>459 | myosin complex | 1 | 0 |                                                                                                                                                                                                | 3.31E-08 | 17 | ENSMUSG00000068270, ENSMUSG00000055775,<br>ENSMUSG00000033196, ENSMUSG00000057003,<br>ENSMUSG00000053093, ENSMUSG00000030672,                                                                                                                                                                                                                                                                                                                                                                                                                                                                                                                                                                                                                                                                    |



|                    |                     |                 |    |                                                                                                                                                                                                                                                                                                                                                                                                                                                                                     |   |   |                                                                                                                                                                                                                                           |
|--------------------|---------------------|-----------------|----|-------------------------------------------------------------------------------------------------------------------------------------------------------------------------------------------------------------------------------------------------------------------------------------------------------------------------------------------------------------------------------------------------------------------------------------------------------------------------------------|---|---|-------------------------------------------------------------------------------------------------------------------------------------------------------------------------------------------------------------------------------------------|
|                    |                     |                 |    |                                                                                                                                                                                                                                                                                                                                                                                                                                                                                     |   |   | ENSMUSG00000033590, ENSMUSG00000033577,<br>ENSMUSG00000032232, ENSMUSG00000042451,<br>ENSMUSG00000061816, ENSMUSG00000056328,<br>ENSMUSG00000039585, ENSMUSG00000059741,<br>ENSMUSG00000060180, ENSMUSG00000020469,<br>ENSMUSG00000040752 |
| GO:<br>0000<br>776 | kinetochore         | 4.78E-10        | 22 | ENSMUSG00000017716, ENSMUSG00000026683,<br>ENSMUSG00000045273, ENSMUSG00000026039,<br>ENSMUSG00000041431, ENSMUSG00000040084,<br>ENSMUSG00000036223, ENSMUSG00000026605,<br>ENSMUSG00000069910, ENSMUSG00000031756,<br>ENSMUSG00000045328, ENSMUSG00000021714,<br>ENSMUSG00000028678, ENSMUSG00000030867,<br>ENSMUSG0000002055, ENSMUSG00000074476,<br>ENSMUSG00000068101, ENSMUSG00000027379,<br>ENSMUSG00000024056, ENSMUSG00000023940,<br>ENSMUSG00000027331, ENSMUSG00000029414 | 1 | 0 |                                                                                                                                                                                                                                           |
| GO:<br>0000<br>922 | spindle pole        | 0.00768979<br>2 | 10 | ENSMUSG00000017499, ENSMUSG00000037544,<br>ENSMUSG00000030867, ENSMUSG00000041431,<br>ENSMUSG00000026605, ENSMUSG00000023940,<br>ENSMUSG00000033952, ENSMUSG00000027496,<br>ENSMUSG00000029414, ENSMUSG00000069910                                                                                                                                                                                                                                                                  | 1 | 0 |                                                                                                                                                                                                                                           |
| GO:<br>0030<br>430 | host cell cytoplasm | 4.37E-08        | 8  | ENSMUSG00000040253, ENSMUSG00000028270,<br>ENSMUSG00000028269, ENSMUSG00000069874,<br>ENSMUSG00000029298, ENSMUSG00000079362,<br>ENSMUSG00000054072, ENSMUSG00000028268                                                                                                                                                                                                                                                                                                             | 1 | 0 |                                                                                                                                                                                                                                           |

|                    |                              |          |    |                                                                                                                                                                                                                                                                                                                                                                                                                                                                                                                                                                                                                                                                                                                                                                                                                                                                                                                                                                             |             |    |                                                                                                                                                                                                                                                                                                                                                                                                                                                                                                                                                                                                                                                                                                                                                                                                                                                                                                                                                                              |
|--------------------|------------------------------|----------|----|-----------------------------------------------------------------------------------------------------------------------------------------------------------------------------------------------------------------------------------------------------------------------------------------------------------------------------------------------------------------------------------------------------------------------------------------------------------------------------------------------------------------------------------------------------------------------------------------------------------------------------------------------------------------------------------------------------------------------------------------------------------------------------------------------------------------------------------------------------------------------------------------------------------------------------------------------------------------------------|-------------|----|------------------------------------------------------------------------------------------------------------------------------------------------------------------------------------------------------------------------------------------------------------------------------------------------------------------------------------------------------------------------------------------------------------------------------------------------------------------------------------------------------------------------------------------------------------------------------------------------------------------------------------------------------------------------------------------------------------------------------------------------------------------------------------------------------------------------------------------------------------------------------------------------------------------------------------------------------------------------------|
| GO:<br>0043<br>656 | intracellular region of host | 4.37E-08 | 8  | ENSMUSG00000040253, ENSMUSG00000028270,<br>ENSMUSG00000028269, ENSMUSG00000069874,<br>ENSMUSG00000029298, ENSMUSG00000079362,<br>ENSMUSG00000054072, ENSMUSG00000028268                                                                                                                                                                                                                                                                                                                                                                                                                                                                                                                                                                                                                                                                                                                                                                                                     | 1           | 0  |                                                                                                                                                                                                                                                                                                                                                                                                                                                                                                                                                                                                                                                                                                                                                                                                                                                                                                                                                                              |
| GO:<br>0044<br>430 | cytoskeletal part            | 1        | 60 | ENSMUSG00000017716, ENSMUSG00000079553,<br>ENSMUSG00000015880, ENSMUSG00000050107,<br>ENSMUSG00000027699, ENSMUSG00000024989,<br>ENSMUSG00000026605, ENSMUSG00000024696,<br>ENSMUSG00000030677, ENSMUSG00000068744,<br>ENSMUSG00000019942, ENSMUSG00000045328,<br>ENSMUSG0000006398, ENSMUSG00000028873,<br>ENSMUSG00000041498, ENSMUSG00000017146,<br>ENSMUSG0000002055, ENSMUSG00000019845,<br>ENSMUSG00000037725, ENSMUSG00000027469,<br>ENSMUSG00000022534, ENSMUSG00000067615,<br>ENSMUSG00000027331, ENSMUSG00000053395,<br>ENSMUSG00000029414, ENSMUSG00000048327,<br>ENSMUSG00000025473, ENSMUSG00000028718,<br>ENSMUSG00000032322, ENSMUSG00000030525,<br>ENSMUSG00000041431, ENSMUSG00000036223,<br>ENSMUSG00000027306, ENSMUSG00000037313,<br>ENSMUSG00000023015, ENSMUSG00000024795,<br>ENSMUSG00000026981, ENSMUSG00000037474,<br>ENSMUSG00000069910, ENSMUSG00000051378,<br>ENSMUSG0000002068, ENSMUSG00000020897,<br>ENSMUSG00000038943, ENSMUSG00000017499, | 0.004846425 | 74 | ENSMUSG00000055775, ENSMUSG00000050463,<br>ENSMUSG00000020524, ENSMUSG00000021909,<br>ENSMUSG00000042451, ENSMUSG00000031812,<br>ENSMUSG00000056328, ENSMUSG00000006777,<br>ENSMUSG00000074673, ENSMUSG00000044041,<br>ENSMUSG00000031176, ENSMUSG00000061527,<br>ENSMUSG00000061397, ENSMUSG00000046095,<br>ENSMUSG0000008035, ENSMUSG00000064179,<br>ENSMUSG00000062380, ENSMUSG00000027470,<br>ENSMUSG00000091898, ENSMUSG00000056267,<br>ENSMUSG00000014846, ENSMUSG00000047746,<br>ENSMUSG00000061723, ENSMUSG00000039585,<br>ENSMUSG00000092137, ENSMUSG00000067594,<br>ENSMUSG00000030554, ENSMUSG00000059741,<br>ENSMUSG00000079480, ENSMUSG00000052374,<br>ENSMUSG00000068270, ENSMUSG00000025810,<br>ENSMUSG00000032366, ENSMUSG00000057003,<br>ENSMUSG00000033196, ENSMUSG00000030672,<br>ENSMUSG00000033577, ENSMUSG00000032010,<br>ENSMUSG0000006457, ENSMUSG00000001986,<br>ENSMUSG00000041688, ENSMUSG00000031972,<br>ENSMUSG00000061816, ENSMUSG00000017300, |

|                    |                                                     |          |    |                                                                                                                                                                                                                                                                                                                                |   |   |                                                                                                                                                                                                                                                                                                                                                                                                                                                                                                                                                                                                                        |
|--------------------|-----------------------------------------------------|----------|----|--------------------------------------------------------------------------------------------------------------------------------------------------------------------------------------------------------------------------------------------------------------------------------------------------------------------------------|---|---|------------------------------------------------------------------------------------------------------------------------------------------------------------------------------------------------------------------------------------------------------------------------------------------------------------------------------------------------------------------------------------------------------------------------------------------------------------------------------------------------------------------------------------------------------------------------------------------------------------------------|
|                    |                                                     |          |    | ENSMUSG00000037544, ENSMUSG00000028678, ENSMUSG00000022385, ENSMUSG00000030867, ENSMUSG00000012443, ENSMUSG00000024397, ENSMUSG00000067614, ENSMUSG00000023940, ENSMUSG00000072082, ENSMUSG00000036768, ENSMUSG00000067613, ENSMUSG00000026779, ENSMUSG00000033952, ENSMUSG00000058290, ENSMUSG00000032218, ENSMUSG00000027496 |   |   | ENSMUSG00000032232, ENSMUSG00000064201, ENSMUSG00000041361, ENSMUSG00000078252, ENSMUSG00000032060, ENSMUSG00000046834, ENSMUSG00000030244, ENSMUSG00000060180, ENSMUSG00000073465, ENSMUSG00000020469, ENSMUSG00000000881, ENSMUSG00000026532, ENSMUSG00000040752, ENSMUSG00000035458, ENSMUSG00000089996, ENSMUSG00000063661, ENSMUSG00000001134, ENSMUSG00000005355, ENSMUSG00000053093, ENSMUSG00000033590, ENSMUSG00000021573, ENSMUSG00000031097, ENSMUSG00000000266, ENSMUSG00000034467, ENSMUSG00000025812, ENSMUSG00000075307, ENSMUSG00000059668, ENSMUSG00000026418, ENSMUSG00000075402, ENSMUSG00000028307 |
| GO:<br>0000<br>780 | condensed nuclear chromosome,<br>centromeric region | 3.88E-05 | 7  | ENSMUSG00000026039, ENSMUSG00000041431, ENSMUSG00000020897, ENSMUSG00000024056, ENSMUSG00000023940, ENSMUSG00000030867, ENSMUSG00000027379                                                                                                                                                                                     | 1 | 0 |                                                                                                                                                                                                                                                                                                                                                                                                                                                                                                                                                                                                                        |
| GO:<br>0000<br>779 | condensed chromosome, centromeric<br>region         | 4.15E-10 | 14 | ENSMUSG00000017716, ENSMUSG00000045328, ENSMUSG00000020897, ENSMUSG00000030867, ENSMUSG00000045273, ENSMUSG00000027379, ENSMUSG00000026039, ENSMUSG00000041431, ENSMUSG00000024056, ENSMUSG00000040084, ENSMUSG00000036223, ENSMUSG00000026605, ENSMUSG00000023940, ENSMUSG00000069910                                         | 1 | 0 |                                                                                                                                                                                                                                                                                                                                                                                                                                                                                                                                                                                                                        |

|                    |                             |          |     |                                                                                                                                                                          |             |     |                                                                                                                                                                                                                                                                                                                                                                                                                                                                 |
|--------------------|-----------------------------|----------|-----|--------------------------------------------------------------------------------------------------------------------------------------------------------------------------|-------------|-----|-----------------------------------------------------------------------------------------------------------------------------------------------------------------------------------------------------------------------------------------------------------------------------------------------------------------------------------------------------------------------------------------------------------------------------------------------------------------|
| GO:<br>0005<br>833 | hemoglobin complex          | 1        | 0   |                                                                                                                                                                          | 0.000174643 | 5   | ENSMUSG00000073940, ENSMUSG00000052187,<br>ENSMUSG00000052305, ENSMUSG00000055609,<br>ENSMUSG00000052217                                                                                                                                                                                                                                                                                                                                                        |
| GO:<br>0020<br>003 | symbiont-containing vacuole | 9.04E-09 | 8   | ENSMUSG00000040253, ENSMUSG00000028270,<br>ENSMUSG00000028269, ENSMUSG00000069874,<br>ENSMUSG00000029298, ENSMUSG00000079362,<br>ENSMUSG00000054072, ENSMUSG00000028268  | 1           | 0   |                                                                                                                                                                                                                                                                                                                                                                                                                                                                 |
| GO:<br>0033<br>646 | host intracellular part     | 4.37E-08 | 8   | ENSMUSG00000040253, ENSMUSG00000028270,<br>ENSMUSG00000028269, ENSMUSG00000069874,<br>ENSMUSG00000029298, ENSMUSG00000079362,<br>ENSMUSG00000054072, ENSMUSG00000028268  | 1           | 0   |                                                                                                                                                                                                                                                                                                                                                                                                                                                                 |
| GO:<br>0070<br>161 | anchoring junction          | 1        | 3   | ENSMUSG00000024696, ENSMUSG00000003283,<br>ENSMUSG00000030677                                                                                                            | 0.000684195 | 21  | ENSMUSG00000001946, ENSMUSG00000056632,<br>ENSMUSG00000039518, ENSMUSG00000030278,<br>ENSMUSG00000061928, ENSMUSG00000059898,<br>ENSMUSG00000039952, ENSMUSG00000053093,<br>ENSMUSG0000006457, ENSMUSG00000052698,<br>ENSMUSG00000021573, ENSMUSG00000022040,<br>ENSMUSG00000025812, ENSMUSG00000069441,<br>ENSMUSG00000041476, ENSMUSG00000026413,<br>ENSMUSG00000030554, ENSMUSG00000044322,<br>ENSMUSG00000052374, ENSMUSG00000034774,<br>ENSMUSG00000040752 |
| GO:<br>0005<br>576 | extracellular region        | 6.76E-19 | 151 | ENSMUSG00000035692, ENSMUSG00000036887,<br>ENSMUSG00000041481, ENSMUSG00000003617,<br>ENSMUSG00000028613, ENSMUSG00000000817,<br>ENSMUSG00000036896, ENSMUSG00000001123, | 1.77E-12    | 140 | ENSMUSG00000025889, ENSMUSG00000039269,<br>ENSMUSG00000051596, ENSMUSG00000023328,<br>ENSMUSG00000059230, ENSMUSG00000026715,<br>ENSMUSG00000040794, ENSMUSG00000002588,                                                                                                                                                                                                                                                                                        |

|  |  |  |                                                                                                                                                                                                                                                                                                                                                                                                                                                                                                                                                                                                                                                                                                                                                                                                                                                                                                                                                                                                                                                                                                                                                           |  |  |                                                                                                                                                                                                                                                                                                                                                                                                                                                                                                                                                                                                                                                                                                                                                                                                                                                                                                                                                                                                                                                                                                                                                           |
|--|--|--|-----------------------------------------------------------------------------------------------------------------------------------------------------------------------------------------------------------------------------------------------------------------------------------------------------------------------------------------------------------------------------------------------------------------------------------------------------------------------------------------------------------------------------------------------------------------------------------------------------------------------------------------------------------------------------------------------------------------------------------------------------------------------------------------------------------------------------------------------------------------------------------------------------------------------------------------------------------------------------------------------------------------------------------------------------------------------------------------------------------------------------------------------------------|--|--|-----------------------------------------------------------------------------------------------------------------------------------------------------------------------------------------------------------------------------------------------------------------------------------------------------------------------------------------------------------------------------------------------------------------------------------------------------------------------------------------------------------------------------------------------------------------------------------------------------------------------------------------------------------------------------------------------------------------------------------------------------------------------------------------------------------------------------------------------------------------------------------------------------------------------------------------------------------------------------------------------------------------------------------------------------------------------------------------------------------------------------------------------------------|
|  |  |  | ENSMUSG00000061947, ENSMUSG00000020053,<br>ENSMUSG00000037321, ENSMUSG00000069874,<br>ENSMUSG00000030954, ENSMUSG00000027322,<br>ENSMUSG00000006403, ENSMUSG00000002992,<br>ENSMUSG00000000982, ENSMUSG00000029304,<br>ENSMUSG00000038067, ENSMUSG00000041536,<br>ENSMUSG00000026656, ENSMUSG00000030218,<br>ENSMUSG00000023913, ENSMUSG00000001131,<br>ENSMUSG00000026582, ENSMUSG00000028268,<br>ENSMUSG00000028480, ENSMUSG00000036905,<br>ENSMUSG00000029664, ENSMUSG00000040528,<br>ENSMUSG00000035352, ENSMUSG00000026822,<br>ENSMUSG00000029379, ENSMUSG00000060747,<br>ENSMUSG00000037974, ENSMUSG00000046845,<br>ENSMUSG00000038209, ENSMUSG00000024330,<br>ENSMUSG00000047517, ENSMUSG00000029377,<br>ENSMUSG00000029811, ENSMUSG00000037202,<br>ENSMUSG00000051439, ENSMUSG00000079451,<br>ENSMUSG00000033880, ENSMUSG00000030413,<br>ENSMUSG00000066364, ENSMUSG00000027398,<br>ENSMUSG00000034459, ENSMUSG00000028362,<br>ENSMUSG00000029005, ENSMUSG00000055170,<br>ENSMUSG00000050957, ENSMUSG00000039899,<br>ENSMUSG0000002847, ENSMUSG00000035042,<br>ENSMUSG00000030077, ENSMUSG00000004296,<br>ENSMUSG00000076612, ENSMUSG00000040026, |  |  | ENSMUSG00000039952, ENSMUSG00000090639,<br>ENSMUSG00000011632, ENSMUSG00000032332,<br>ENSMUSG00000033208, ENSMUSG00000057969,<br>ENSMUSG00000028356, ENSMUSG00000010051,<br>ENSMUSG00000017697, ENSMUSG00000074199,<br>ENSMUSG00000057606, ENSMUSG00000061808,<br>ENSMUSG00000037010, ENSMUSG00000032311,<br>ENSMUSG00000027376, ENSMUSG00000022868,<br>ENSMUSG00000026984, ENSMUSG00000046056,<br>ENSMUSG00000073602, ENSMUSG00000044594,<br>ENSMUSG00000033544, ENSMUSG00000032172,<br>ENSMUSG00000059327, ENSMUSG00000067006,<br>ENSMUSG00000036395, ENSMUSG00000032083,<br>ENSMUSG00000066108, ENSMUSG00000028989,<br>ENSMUSG00000031780, ENSMUSG00000059481,<br>ENSMUSG00000054196, ENSMUSG00000006235,<br>ENSMUSG00000055632, ENSMUSG00000031980,<br>ENSMUSG00000039070, ENSMUSG00000031380,<br>ENSMUSG00000012705, ENSMUSG00000033831,<br>ENSMUSG00000052911, ENSMUSG00000031841,<br>ENSMUSG00000030713, ENSMUSG00000032554,<br>ENSMUSG00000021319, ENSMUSG00000030607,<br>ENSMUSG00000075605, ENSMUSG0000005705,<br>ENSMUSG00000022996, ENSMUSG00000030359,<br>ENSMUSG00000074336, ENSMUSG00000070531,<br>ENSMUSG00000031283, ENSMUSG00000073601, |
|--|--|--|-----------------------------------------------------------------------------------------------------------------------------------------------------------------------------------------------------------------------------------------------------------------------------------------------------------------------------------------------------------------------------------------------------------------------------------------------------------------------------------------------------------------------------------------------------------------------------------------------------------------------------------------------------------------------------------------------------------------------------------------------------------------------------------------------------------------------------------------------------------------------------------------------------------------------------------------------------------------------------------------------------------------------------------------------------------------------------------------------------------------------------------------------------------|--|--|-----------------------------------------------------------------------------------------------------------------------------------------------------------------------------------------------------------------------------------------------------------------------------------------------------------------------------------------------------------------------------------------------------------------------------------------------------------------------------------------------------------------------------------------------------------------------------------------------------------------------------------------------------------------------------------------------------------------------------------------------------------------------------------------------------------------------------------------------------------------------------------------------------------------------------------------------------------------------------------------------------------------------------------------------------------------------------------------------------------------------------------------------------------|

|  |  |  |                                                                                                                                                                                                                                                                                                                                                                                                                                                                                                                                                                                                                                                                                                                                                                                                                                                                                                                                                                                                                                                                                                                                                           |  |                                                                                                                                                                                                                                                                                                                                                                                                                                                                                                                                                                                                                                                                                                                                                                                                                                                                                                                                                                                                                                                                                                                                                            |
|--|--|--|-----------------------------------------------------------------------------------------------------------------------------------------------------------------------------------------------------------------------------------------------------------------------------------------------------------------------------------------------------------------------------------------------------------------------------------------------------------------------------------------------------------------------------------------------------------------------------------------------------------------------------------------------------------------------------------------------------------------------------------------------------------------------------------------------------------------------------------------------------------------------------------------------------------------------------------------------------------------------------------------------------------------------------------------------------------------------------------------------------------------------------------------------------------|--|------------------------------------------------------------------------------------------------------------------------------------------------------------------------------------------------------------------------------------------------------------------------------------------------------------------------------------------------------------------------------------------------------------------------------------------------------------------------------------------------------------------------------------------------------------------------------------------------------------------------------------------------------------------------------------------------------------------------------------------------------------------------------------------------------------------------------------------------------------------------------------------------------------------------------------------------------------------------------------------------------------------------------------------------------------------------------------------------------------------------------------------------------------|
|  |  |  | ENSMUSG00000018486, ENSMUSG00000023078,<br>ENSMUSG0000000202, ENSMUSG00000034394,<br>ENSMUSG00000024401, ENSMUSG00000036596,<br>ENSMUSG00000090231, ENSMUSG00000028971,<br>ENSMUSG00000026580, ENSMUSG00000025746,<br>ENSMUSG00000066361, ENSMUSG00000058755,<br>ENSMUSG00000060802, ENSMUSG00000066363,<br>ENSMUSG00000022026, ENSMUSG00000009185,<br>ENSMUSG00000024989, ENSMUSG00000068129,<br>ENSMUSG00000079563, ENSMUSG00000016529,<br>ENSMUSG00000045232, ENSMUSG00000000392,<br>ENSMUSG00000026073, ENSMUSG00000018930,<br>ENSMUSG00000058207, ENSMUSG00000040253,<br>ENSMUSG00000034482, ENSMUSG00000030895,<br>ENSMUSG00000000182, ENSMUSG00000021091,<br>ENSMUSG00000054072, ENSMUSG00000034855,<br>ENSMUSG00000079019, ENSMUSG00000044701,<br>ENSMUSG00000018920, ENSMUSG00000079362,<br>ENSMUSG00000070427, ENSMUSG00000022548,<br>ENSMUSG00000035493, ENSMUSG00000005800,<br>ENSMUSG00000050578, ENSMUSG00000028270,<br>ENSMUSG00000035373, ENSMUSG00000021322,<br>ENSMUSG00000024371, ENSMUSG00000038357,<br>ENSMUSG00000057465, ENSMUSG00000055172,<br>ENSMUSG00000022824, ENSMUSG00000030793,<br>ENSMUSG00000079620, ENSMUSG00000021614, |  | ENSMUSG00000025784, ENSMUSG00000029019,<br>ENSMUSG00000032403, ENSMUSG00000019326,<br>ENSMUSG00000056078, ENSMUSG00000023046,<br>ENSMUSG00000032081, ENSMUSG00000024653,<br>ENSMUSG00000062778, ENSMUSG00000027483,<br>ENSMUSG00000038791, ENSMUSG00000058914,<br>ENSMUSG00000033044, ENSMUSG00000023235,<br>ENSMUSG00000037358, ENSMUSG00000033327,<br>ENSMUSG00000022491, ENSMUSG00000031274,<br>ENSMUSG00000042379, ENSMUSG00000044820,<br>ENSMUSG00000026983, ENSMUSG00000043719,<br>ENSMUSG00000026874, ENSMUSG00000039278,<br>ENSMUSG00000039004, ENSMUSG00000026668,<br>ENSMUSG00000031253, ENSMUSG00000058260,<br>ENSMUSG00000043587, ENSMUSG00000022871,<br>ENSMUSG00000036655, ENSMUSG00000022878,<br>ENSMUSG00000091345, ENSMUSG00000004892,<br>ENSMUSG00000059201, ENSMUSG00000039518,<br>ENSMUSG00000064057, ENSMUSG00000058135,<br>ENSMUSG00000025431, ENSMUSG00000054863,<br>ENSMUSG00000001494, ENSMUSG00000066235,<br>ENSMUSG00000000049, ENSMUSG00000024990,<br>ENSMUSG00000015405, ENSMUSG00000026085,<br>ENSMUSG00000037577, ENSMUSG00000031134,<br>ENSMUSG00000040488, ENSMUSG00000029368,<br>ENSMUSG00000061780, ENSMUSG00000029236, |
|--|--|--|-----------------------------------------------------------------------------------------------------------------------------------------------------------------------------------------------------------------------------------------------------------------------------------------------------------------------------------------------------------------------------------------------------------------------------------------------------------------------------------------------------------------------------------------------------------------------------------------------------------------------------------------------------------------------------------------------------------------------------------------------------------------------------------------------------------------------------------------------------------------------------------------------------------------------------------------------------------------------------------------------------------------------------------------------------------------------------------------------------------------------------------------------------------|--|------------------------------------------------------------------------------------------------------------------------------------------------------------------------------------------------------------------------------------------------------------------------------------------------------------------------------------------------------------------------------------------------------------------------------------------------------------------------------------------------------------------------------------------------------------------------------------------------------------------------------------------------------------------------------------------------------------------------------------------------------------------------------------------------------------------------------------------------------------------------------------------------------------------------------------------------------------------------------------------------------------------------------------------------------------------------------------------------------------------------------------------------------------|

|                    |                 |          |     |                                                                                                                                                                                                                                                                                                                                                                                                                                                                                                                                                                                                                                                                                                                                                                                                                                                                                                                  |   |     |                                                                                                                                                                                                                                                                                                                                                                                                                                                                                                                                                                                                                                                        |
|--------------------|-----------------|----------|-----|------------------------------------------------------------------------------------------------------------------------------------------------------------------------------------------------------------------------------------------------------------------------------------------------------------------------------------------------------------------------------------------------------------------------------------------------------------------------------------------------------------------------------------------------------------------------------------------------------------------------------------------------------------------------------------------------------------------------------------------------------------------------------------------------------------------------------------------------------------------------------------------------------------------|---|-----|--------------------------------------------------------------------------------------------------------------------------------------------------------------------------------------------------------------------------------------------------------------------------------------------------------------------------------------------------------------------------------------------------------------------------------------------------------------------------------------------------------------------------------------------------------------------------------------------------------------------------------------------------------|
|                    |                 |          |     | <p>ENSMUSG00000048806, ENSMUSG00000038580,<br/> ENSMUSG00000038508, ENSMUSG00000029380,<br/> ENSMUSG00000021451, ENSMUSG00000027832,<br/> ENSMUSG00000025044, ENSMUSG00000030017,<br/> ENSMUSG00000058427, ENSMUSG00000029417,<br/> ENSMUSG00000031444, ENSMUSG00000028255,<br/> ENSMUSG00000061100, ENSMUSG00000029298,<br/> ENSMUSG00000074115, ENSMUSG00000029378,<br/> ENSMUSG00000035385, ENSMUSG00000023132,<br/> ENSMUSG00000023992, ENSMUSG00000040017,<br/> ENSMUSG00000026166, ENSMUSG00000030117,<br/> ENSMUSG00000041324, ENSMUSG00000021423,<br/> ENSMUSG00000028269, ENSMUSG00000092005,<br/> ENSMUSG00000026573, ENSMUSG00000033453,<br/> ENSMUSG00000015854, ENSMUSG00000026981,<br/> ENSMUSG00000029371, ENSMUSG00000028751,<br/> ENSMUSG00000024529, ENSMUSG00000079012,<br/> ENSMUSG00000021765, ENSMUSG00000024339,<br/> ENSMUSG00000030111, ENSMUSG00000054136,<br/> ENSMUSG00000020010</p> |   |     | <p>ENSMUSG00000059898, ENSMUSG00000041012,<br/> ENSMUSG00000024028, ENSMUSG00000061259,<br/> ENSMUSG00000018566, ENSMUSG00000041559,<br/> ENSMUSG00000033595, ENSMUSG00000023336,<br/> ENSMUSG00000038233, ENSMUSG00000020427,<br/> ENSMUSG00000055561, ENSMUSG00000024386,<br/> ENSMUSG00000015354, ENSMUSG00000071858,<br/> ENSMUSG00000040533, ENSMUSG00000074264,<br/> ENSMUSG00000055653, ENSMUSG00000036216,<br/> ENSMUSG00000058017, ENSMUSG00000040972,<br/> ENSMUSG00000050762, ENSMUSG00000030606,<br/> ENSMUSG00000035540, ENSMUSG00000060962,<br/> ENSMUSG00000027442, ENSMUSG00000056978,<br/> ENSMUSG00000030048, ENSMUSG00000071347</p> |
| GO:<br>0005<br>886 | plasma membrane | 4.07E-07 | 202 | <p>ENSMUSG00000039364, ENSMUSG00000017716,<br/> ENSMUSG00000027995, ENSMUSG00000031098,<br/> ENSMUSG00000048534, ENSMUSG00000027699,<br/> ENSMUSG00000003617, ENSMUSG00000024857,<br/> ENSMUSG00000049103, ENSMUSG00000061232,<br/> ENSMUSG00000028613, ENSMUSG00000053977,</p>                                                                                                                                                                                                                                                                                                                                                                                                                                                                                                                                                                                                                                  | 1 | 170 | <p>ENSMUSG00000039956, ENSMUSG00000030302,<br/> ENSMUSG00000032547, ENSMUSG00000032452,<br/> ENSMUSG00000025889, ENSMUSG00000023328,<br/> ENSMUSG00000007122, ENSMUSG00000031881,<br/> ENSMUSG00000027849, ENSMUSG00000090877,<br/> ENSMUSG00000039952, ENSMUSG00000090639,</p>                                                                                                                                                                                                                                                                                                                                                                        |

|  |  |  |                                                                                                                                                                                                                                                                                                                                                                                                                                                                                                                                                                                                                                                                                                                                                                                                                                                                                                                                                                                                                                                                                                                                                            |  |                                                                                                                                                                                                                                                                                                                                                                                                                                                                                                                                                                                                                                                                                                                                                                                                                                                                                                                                                                                                                                                                                                                                                            |
|--|--|--|------------------------------------------------------------------------------------------------------------------------------------------------------------------------------------------------------------------------------------------------------------------------------------------------------------------------------------------------------------------------------------------------------------------------------------------------------------------------------------------------------------------------------------------------------------------------------------------------------------------------------------------------------------------------------------------------------------------------------------------------------------------------------------------------------------------------------------------------------------------------------------------------------------------------------------------------------------------------------------------------------------------------------------------------------------------------------------------------------------------------------------------------------------|--|------------------------------------------------------------------------------------------------------------------------------------------------------------------------------------------------------------------------------------------------------------------------------------------------------------------------------------------------------------------------------------------------------------------------------------------------------------------------------------------------------------------------------------------------------------------------------------------------------------------------------------------------------------------------------------------------------------------------------------------------------------------------------------------------------------------------------------------------------------------------------------------------------------------------------------------------------------------------------------------------------------------------------------------------------------------------------------------------------------------------------------------------------------|
|  |  |  | ENSMUSG00000058728, ENSMUSG00000050232,<br>ENSMUSG00000022831, ENSMUSG00000047293,<br>ENSMUSG00000020848, ENSMUSG00000000817,<br>ENSMUSG00000030786, ENSMUSG00000028071,<br>ENSMUSG00000040264, ENSMUSG00000037321,<br>ENSMUSG00000055541, ENSMUSG00000030156,<br>ENSMUSG00000028262, ENSMUSG00000053395,<br>ENSMUSG00000025473, ENSMUSG00000045322,<br>ENSMUSG00000030954, ENSMUSG00000027322,<br>ENSMUSG00000025492, ENSMUSG00000027219,<br>ENSMUSG00000055994, ENSMUSG00000030149,<br>ENSMUSG00000009292, ENSMUSG00000025739,<br>ENSMUSG00000026656, ENSMUSG00000029075,<br>ENSMUSG00000030124, ENSMUSG00000026582,<br>ENSMUSG00000022094, ENSMUSG00000052212,<br>ENSMUSG00000028068, ENSMUSG00000058818,<br>ENSMUSG00000047330, ENSMUSG00000071715,<br>ENSMUSG00000030187, ENSMUSG00000026009,<br>ENSMUSG00000040528, ENSMUSG00000071005,<br>ENSMUSG00000038209, ENSMUSG00000029377,<br>ENSMUSG00000047798, ENSMUSG00000029811,<br>ENSMUSG00000037202, ENSMUSG00000051439,<br>ENSMUSG00000038179, ENSMUSG00000073406,<br>ENSMUSG00000053063, ENSMUSG00000079451,<br>ENSMUSG00000075602, ENSMUSG00000048031,<br>ENSMUSG00000001901, ENSMUSG00000047230, |  | ENSMUSG00000061393, ENSMUSG00000071317,<br>ENSMUSG00000073413, ENSMUSG00000029195,<br>ENSMUSG00000028356, ENSMUSG00000027401,<br>ENSMUSG00000061527, ENSMUSG00000017697,<br>ENSMUSG00000044322, ENSMUSG00000032311,<br>ENSMUSG00000032076, ENSMUSG00000024027,<br>ENSMUSG00000027376, ENSMUSG00000019359,<br>ENSMUSG00000056632, ENSMUSG00000032034,<br>ENSMUSG00000059412, ENSMUSG00000028427,<br>ENSMUSG00000059327, ENSMUSG00000047182,<br>ENSMUSG00000027820, ENSMUSG00000032491,<br>ENSMUSG00000017309, ENSMUSG00000023013,<br>ENSMUSG00000051431, ENSMUSG00000050520,<br>ENSMUSG00000033965, ENSMUSG00000059481,<br>ENSMUSG00000031997, ENSMUSG00000006235,<br>ENSMUSG00000052374, ENSMUSG00000034774,<br>ENSMUSG00000019894, ENSMUSG00000045775,<br>ENSMUSG00000040412, ENSMUSG00000033831,<br>ENSMUSG00000038064, ENSMUSG00000008153,<br>ENSMUSG00000061928, ENSMUSG00000031841,<br>ENSMUSG00000032554, ENSMUSG00000033577,<br>ENSMUSG00000006269, ENSMUSG00000006457,<br>ENSMUSG00000041688, ENSMUSG00000052698,<br>ENSMUSG00000032232, ENSMUSG00000031996,<br>ENSMUSG00000047797, ENSMUSG00000022996,<br>ENSMUSG00000031146, ENSMUSG00000019278, |
|--|--|--|------------------------------------------------------------------------------------------------------------------------------------------------------------------------------------------------------------------------------------------------------------------------------------------------------------------------------------------------------------------------------------------------------------------------------------------------------------------------------------------------------------------------------------------------------------------------------------------------------------------------------------------------------------------------------------------------------------------------------------------------------------------------------------------------------------------------------------------------------------------------------------------------------------------------------------------------------------------------------------------------------------------------------------------------------------------------------------------------------------------------------------------------------------|--|------------------------------------------------------------------------------------------------------------------------------------------------------------------------------------------------------------------------------------------------------------------------------------------------------------------------------------------------------------------------------------------------------------------------------------------------------------------------------------------------------------------------------------------------------------------------------------------------------------------------------------------------------------------------------------------------------------------------------------------------------------------------------------------------------------------------------------------------------------------------------------------------------------------------------------------------------------------------------------------------------------------------------------------------------------------------------------------------------------------------------------------------------------|



|  |  |  |                                                                                                                                                                                                                                                                                                                                                                                                                                                                                                                                                                                                                                                                                                                                                                                                                                                                                                                                                                                                                                                                                                                                                            |  |  |                                                                                                                                                                                                                                                                                                                                                                                                                                                                                                                                                                                                                                                                                                                                                                                                                                                                                                                                                                                                                                                                                                                                                           |
|--|--|--|------------------------------------------------------------------------------------------------------------------------------------------------------------------------------------------------------------------------------------------------------------------------------------------------------------------------------------------------------------------------------------------------------------------------------------------------------------------------------------------------------------------------------------------------------------------------------------------------------------------------------------------------------------------------------------------------------------------------------------------------------------------------------------------------------------------------------------------------------------------------------------------------------------------------------------------------------------------------------------------------------------------------------------------------------------------------------------------------------------------------------------------------------------|--|--|-----------------------------------------------------------------------------------------------------------------------------------------------------------------------------------------------------------------------------------------------------------------------------------------------------------------------------------------------------------------------------------------------------------------------------------------------------------------------------------------------------------------------------------------------------------------------------------------------------------------------------------------------------------------------------------------------------------------------------------------------------------------------------------------------------------------------------------------------------------------------------------------------------------------------------------------------------------------------------------------------------------------------------------------------------------------------------------------------------------------------------------------------------------|
|  |  |  | ENSMUSG00000028217, ENSMUSG00000059089,<br>ENSMUSG00000062593, ENSMUSG00000061577,<br>ENSMUSG00000016496, ENSMUSG00000013643,<br>ENSMUSG00000055170, ENSMUSG00000028965,<br>ENSMUSG00000068227, ENSMUSG00000027843,<br>ENSMUSG00000067341, ENSMUSG00000058715,<br>ENSMUSG00000030077, ENSMUSG00000024124,<br>ENSMUSG00000026475, ENSMUSG00000000791,<br>ENSMUSG00000050896, ENSMUSG00000015947,<br>ENSMUSG00000021624, ENSMUSG00000018486,<br>ENSMUSG00000023903, ENSMUSG00000037440,<br>ENSMUSG00000079298, ENSMUSG00000026358,<br>ENSMUSG00000024401, ENSMUSG00000073409,<br>ENSMUSG00000026580, ENSMUSG00000025746,<br>ENSMUSG00000048498, ENSMUSG00000067610,<br>ENSMUSG00000053101, ENSMUSG00000038304,<br>ENSMUSG00000079700, ENSMUSG00000004328,<br>ENSMUSG00000022583, ENSMUSG00000026271,<br>ENSMUSG00000060802, ENSMUSG00000001773,<br>ENSMUSG00000058755, ENSMUSG00000024112,<br>ENSMUSG00000046908, ENSMUSG00000047197,<br>ENSMUSG00000000392, ENSMUSG00000026073,<br>ENSMUSG00000060550, ENSMUSG00000059994,<br>ENSMUSG00000028072, ENSMUSG00000020684,<br>ENSMUSG00000078452, ENSMUSG00000025804,<br>ENSMUSG00000034652, ENSMUSG00000046718, |  |  | ENSMUSG00000035776, ENSMUSG00000032216,<br>ENSMUSG0000006574, ENSMUSG00000041523,<br>ENSMUSG00000032060, ENSMUSG00000047216,<br>ENSMUSG00000029361, ENSMUSG00000032528,<br>ENSMUSG00000038119, ENSMUSG00000073424,<br>ENSMUSG00000040752, ENSMUSG00000023011,<br>ENSMUSG00000019326, ENSMUSG00000010064,<br>ENSMUSG00000001946, ENSMUSG00000053093,<br>ENSMUSG00000035459, ENSMUSG00000021573,<br>ENSMUSG00000025812, ENSMUSG00000045103,<br>ENSMUSG00000041476, ENSMUSG00000031377,<br>ENSMUSG00000026961, ENSMUSG00000040808,<br>ENSMUSG00000010047, ENSMUSG00000020123,<br>ENSMUSG00000034783, ENSMUSG00000022491,<br>ENSMUSG00000026304, ENSMUSG00000032511,<br>ENSMUSG00000057454, ENSMUSG00000020524,<br>ENSMUSG00000026824, ENSMUSG00000030865,<br>ENSMUSG00000067951, ENSMUSG00000026874,<br>ENSMUSG00000031209, ENSMUSG00000031176,<br>ENSMUSG00000032839, ENSMUSG00000060579,<br>ENSMUSG00000029193, ENSMUSG00000079355,<br>ENSMUSG00000040055, ENSMUSG00000013076,<br>ENSMUSG00000066072, ENSMUSG00000032086,<br>ENSMUSG00000030278, ENSMUSG00000038201,<br>ENSMUSG00000044338, ENSMUSG00000050164,<br>ENSMUSG00000022040, ENSMUSG00000092137, |
|--|--|--|------------------------------------------------------------------------------------------------------------------------------------------------------------------------------------------------------------------------------------------------------------------------------------------------------------------------------------------------------------------------------------------------------------------------------------------------------------------------------------------------------------------------------------------------------------------------------------------------------------------------------------------------------------------------------------------------------------------------------------------------------------------------------------------------------------------------------------------------------------------------------------------------------------------------------------------------------------------------------------------------------------------------------------------------------------------------------------------------------------------------------------------------------------|--|--|-----------------------------------------------------------------------------------------------------------------------------------------------------------------------------------------------------------------------------------------------------------------------------------------------------------------------------------------------------------------------------------------------------------------------------------------------------------------------------------------------------------------------------------------------------------------------------------------------------------------------------------------------------------------------------------------------------------------------------------------------------------------------------------------------------------------------------------------------------------------------------------------------------------------------------------------------------------------------------------------------------------------------------------------------------------------------------------------------------------------------------------------------------------|

|  |  |  |                                                                                                                                                                                                                                                                                                                                                                                                                                                                                                                                                                                                                                                                                                                                                                                                                                                                                                                                                                                                                                                                                                                                                           |  |  |                                                                                                                                                                                                                                                                                                                                                                                                                                                                                                                                                                                                                                                                                                                                                                                                                                                                                                                                                                                                                                                                                                                                                            |
|--|--|--|-----------------------------------------------------------------------------------------------------------------------------------------------------------------------------------------------------------------------------------------------------------------------------------------------------------------------------------------------------------------------------------------------------------------------------------------------------------------------------------------------------------------------------------------------------------------------------------------------------------------------------------------------------------------------------------------------------------------------------------------------------------------------------------------------------------------------------------------------------------------------------------------------------------------------------------------------------------------------------------------------------------------------------------------------------------------------------------------------------------------------------------------------------------|--|--|------------------------------------------------------------------------------------------------------------------------------------------------------------------------------------------------------------------------------------------------------------------------------------------------------------------------------------------------------------------------------------------------------------------------------------------------------------------------------------------------------------------------------------------------------------------------------------------------------------------------------------------------------------------------------------------------------------------------------------------------------------------------------------------------------------------------------------------------------------------------------------------------------------------------------------------------------------------------------------------------------------------------------------------------------------------------------------------------------------------------------------------------------------|
|  |  |  | ENSMUSG00000051498, ENSMUSG00000020651,<br>ENSMUSG00000044811, ENSMUSG00000029816,<br>ENSMUSG00000032586, ENSMUSG00000034855,<br>ENSMUSG00000030651, ENSMUSG00000026770,<br>ENSMUSG00000033470, ENSMUSG00000033031,<br>ENSMUSG00000034641, ENSMUSG00000040133,<br>ENSMUSG00000040751, ENSMUSG00000030525,<br>ENSMUSG00000040552, ENSMUSG00000028270,<br>ENSMUSG00000051378, ENSMUSG00000022824,<br>ENSMUSG00000050241, ENSMUSG00000028459,<br>ENSMUSG0000003283, ENSMUSG00000022586,<br>ENSMUSG00000056025, ENSMUSG00000079620,<br>ENSMUSG00000016498, ENSMUSG00000044138,<br>ENSMUSG00000024397, ENSMUSG00000022582,<br>ENSMUSG00000022587, ENSMUSG00000036362,<br>ENSMUSG00000044583, ENSMUSG00000053219,<br>ENSMUSG00000021451, ENSMUSG00000038963,<br>ENSMUSG00000025044, ENSMUSG00000071311,<br>ENSMUSG00000024791, ENSMUSG00000029417,<br>ENSMUSG00000071068, ENSMUSG00000034730,<br>ENSMUSG00000024696, ENSMUSG00000030677,<br>ENSMUSG00000073411, ENSMUSG00000023992,<br>ENSMUSG00000017146, ENSMUSG00000075122,<br>ENSMUSG00000004952, ENSMUSG00000028874,<br>ENSMUSG00000029915, ENSMUSG00000030365,<br>ENSMUSG00000026011, ENSMUSG00000030167, |  |  | ENSMUSG00000029205, ENSMUSG00000024471,<br>ENSMUSG00000032548, ENSMUSG00000015405,<br>ENSMUSG00000049281, ENSMUSG00000025265,<br>ENSMUSG00000032531, ENSMUSG00000068270,<br>ENSMUSG00000025810, ENSMUSG00000049556,<br>ENSMUSG00000032366, ENSMUSG00000055980,<br>ENSMUSG00000046480, ENSMUSG00000001943,<br>ENSMUSG00000074505, ENSMUSG00000059898,<br>ENSMUSG00000057182, ENSMUSG00000001986,<br>ENSMUSG00000061259, ENSMUSG00000018566,<br>ENSMUSG00000021055, ENSMUSG00000036813,<br>ENSMUSG00000031489, ENSMUSG00000041361,<br>ENSMUSG00000001300, ENSMUSG00000022595,<br>ENSMUSG00000037681, ENSMUSG00000046834,<br>ENSMUSG00000023092, ENSMUSG00000025153,<br>ENSMUSG00000073465, ENSMUSG00000051726,<br>ENSMUSG00000055653, ENSMUSG00000032570,<br>ENSMUSG00000032911, ENSMUSG00000020183,<br>ENSMUSG00000007815, ENSMUSG00000041748,<br>ENSMUSG00000061273, ENSMUSG00000043165,<br>ENSMUSG00000029669, ENSMUSG00000019478,<br>ENSMUSG00000044359, ENSMUSG00000044287,<br>ENSMUSG00000032377, ENSMUSG00000039114,<br>ENSMUSG00000069441, ENSMUSG00000029862,<br>ENSMUSG00000028036, ENSMUSG00000075307,<br>ENSMUSG00000058022, ENSMUSG00000037624, |
|--|--|--|-----------------------------------------------------------------------------------------------------------------------------------------------------------------------------------------------------------------------------------------------------------------------------------------------------------------------------------------------------------------------------------------------------------------------------------------------------------------------------------------------------------------------------------------------------------------------------------------------------------------------------------------------------------------------------------------------------------------------------------------------------------------------------------------------------------------------------------------------------------------------------------------------------------------------------------------------------------------------------------------------------------------------------------------------------------------------------------------------------------------------------------------------------------|--|--|------------------------------------------------------------------------------------------------------------------------------------------------------------------------------------------------------------------------------------------------------------------------------------------------------------------------------------------------------------------------------------------------------------------------------------------------------------------------------------------------------------------------------------------------------------------------------------------------------------------------------------------------------------------------------------------------------------------------------------------------------------------------------------------------------------------------------------------------------------------------------------------------------------------------------------------------------------------------------------------------------------------------------------------------------------------------------------------------------------------------------------------------------------|

|                    |                      |   |    |                                                                                                                                                                                                                                                                                                                                                                                                                                                                                                                                                                                                                                                                                                                                                        |          |             |                                                                                                                                                                         |                                                                                                                                                                                                                     |
|--------------------|----------------------|---|----|--------------------------------------------------------------------------------------------------------------------------------------------------------------------------------------------------------------------------------------------------------------------------------------------------------------------------------------------------------------------------------------------------------------------------------------------------------------------------------------------------------------------------------------------------------------------------------------------------------------------------------------------------------------------------------------------------------------------------------------------------------|----------|-------------|-------------------------------------------------------------------------------------------------------------------------------------------------------------------------|---------------------------------------------------------------------------------------------------------------------------------------------------------------------------------------------------------------------|
|                    |                      |   |    | ENSMUSG00000026285, ENSMUSG00000019320,<br>ENSMUSG00000079227, ENSMUSG00000049608,<br>ENSMUSG00000040010, ENSMUSG00000036469,<br>ENSMUSG00000035683, ENSMUSG00000067212,<br>ENSMUSG00000057135, ENSMUSG00000040033,<br>ENSMUSG00000056529, ENSMUSG00000062082,<br>ENSMUSG00000024349, ENSMUSG00000056494,<br>ENSMUSG00000035929, ENSMUSG00000043811,<br>ENSMUSG00000024798, ENSMUSG00000022901,<br>ENSMUSG00000021886, ENSMUSG00000044827,<br>ENSMUSG00000038943, ENSMUSG00000050075,<br>ENSMUSG00000056290, ENSMUSG00000072572,<br>ENSMUSG00000046879, ENSMUSG00000034422,<br>ENSMUSG00000012428, ENSMUSG00000024339,<br>ENSMUSG00000041347, ENSMUSG00000045763,<br>ENSMUSG00000063234, ENSMUSG00000026177,<br>ENSMUSG00000020010, ENSMUSG00000022584 |          |             | ENSMUSG00000028307, ENSMUSG00000061974                                                                                                                                  |                                                                                                                                                                                                                     |
| GO:<br>0030<br>057 | desmosome            | 1 | 0  |                                                                                                                                                                                                                                                                                                                                                                                                                                                                                                                                                                                                                                                                                                                                                        | 9.58E-05 | 8           | ENSMUSG00000061928, ENSMUSG00000059898,<br>ENSMUSG00000044322, ENSMUSG00000069441,<br>ENSMUSG00000056632, ENSMUSG00000039518,<br>ENSMUSG00000034774, ENSMUSG00000026413 |                                                                                                                                                                                                                     |
| GO:<br>0031<br>012 | extracellular matrix | 1 | 22 | ENSMUSG00000025044, ENSMUSG00000036905,<br>ENSMUSG00000006403, ENSMUSG00000005800,<br>ENSMUSG00000035493, ENSMUSG00000036887,<br>ENSMUSG00000037974, ENSMUSG00000024330,<br>ENSMUSG00000050578, ENSMUSG00000047517,                                                                                                                                                                                                                                                                                                                                                                                                                                                                                                                                    |          | 0.005498301 | 33                                                                                                                                                                      | ENSMUSG00000033327, ENSMUSG00000029368,<br>ENSMUSG00000040488, ENSMUSG00000025889,<br>ENSMUSG00000039269, ENSMUSG00000052911,<br>ENSMUSG00000023328, ENSMUSG00000031274,<br>ENSMUSG00000039952, ENSMUSG00000090639, |

|                    |                          |          |   |                                                                                                                                                                                                                                                               |             |    |                                                                                                                                                                                                                                                                                                                                                                                                                                                                                                             |
|--------------------|--------------------------|----------|---|---------------------------------------------------------------------------------------------------------------------------------------------------------------------------------------------------------------------------------------------------------------|-------------|----|-------------------------------------------------------------------------------------------------------------------------------------------------------------------------------------------------------------------------------------------------------------------------------------------------------------------------------------------------------------------------------------------------------------------------------------------------------------------------------------------------------------|
|                    |                          |          |   | ENSMUSG00000030077, ENSMUSG00000033453,<br>ENSMUSG00000030218, ENSMUSG00000018486,<br>ENSMUSG00000033880, ENSMUSG00000023903,<br>ENSMUSG00000001131, ENSMUSG00000036896,<br>ENSMUSG00000024529, ENSMUSG00000021614,<br>ENSMUSG00000036596, ENSMUSG00000020053 |             |    | ENSMUSG00000032554, ENSMUSG00000043719,<br>ENSMUSG00000001986, ENSMUSG00000032332,<br>ENSMUSG00000030607, ENSMUSG00000026668,<br>ENSMUSG00000041559, ENSMUSG00000022996,<br>ENSMUSG00000025784, ENSMUSG00000057606,<br>ENSMUSG00000036655, ENSMUSG00000022878,<br>ENSMUSG00000091345, ENSMUSG00000040533,<br>ENSMUSG00000004892, ENSMUSG00000055653,<br>ENSMUSG00000022868, ENSMUSG00000059327,<br>ENSMUSG00000030606, ENSMUSG00000058914,<br>ENSMUSG00000054196, ENSMUSG00000055632,<br>ENSMUSG00000071347 |
| GO:<br>0033<br>655 | host cell cytoplasm part | 4.37E-08 | 8 | ENSMUSG00000040253, ENSMUSG00000028270,<br>ENSMUSG00000028269, ENSMUSG00000069874,<br>ENSMUSG00000029298, ENSMUSG00000079362,<br>ENSMUSG00000054072, ENSMUSG00000028268                                                                                       | 1           | 0  |                                                                                                                                                                                                                                                                                                                                                                                                                                                                                                             |
| GO:<br>0043<br>034 | costamere                | 1        | 0 |                                                                                                                                                                                                                                                               | 0.006781018 | 6  | ENSMUSG00000047419, ENSMUSG00000030554,<br>ENSMUSG00000039952, ENSMUSG00000045103,<br>ENSMUSG00000041476, ENSMUSG00000032839                                                                                                                                                                                                                                                                                                                                                                                |
| GO:<br>0031<br>672 | A band                   | 1        | 0 |                                                                                                                                                                                                                                                               | 5.75E-05    | 8  | ENSMUSG00000030730, ENSMUSG00000056328,<br>ENSMUSG00000061086, ENSMUSG00000033196,<br>ENSMUSG00000041476, ENSMUSG00000027077,<br>ENSMUSG00000059741, ENSMUSG00000020469                                                                                                                                                                                                                                                                                                                                     |
| GO:<br>0044<br>449 | contractile fiber part   | 1        | 0 |                                                                                                                                                                                                                                                               | 6.12E-21    | 38 | ENSMUSG00000030730, ENSMUSG00000032366,<br>ENSMUSG00000033196, ENSMUSG00000031312,<br>ENSMUSG00000007122, ENSMUSG00000047419,                                                                                                                                                                                                                                                                                                                                                                               |

|                    |                             |          |    |                                                                                                                                                                         |          |    |                                                                                                                                                                                                                                                                                                                                                                                                                                                                                                                                                                                                                                                                                                             |
|--------------------|-----------------------------|----------|----|-------------------------------------------------------------------------------------------------------------------------------------------------------------------------|----------|----|-------------------------------------------------------------------------------------------------------------------------------------------------------------------------------------------------------------------------------------------------------------------------------------------------------------------------------------------------------------------------------------------------------------------------------------------------------------------------------------------------------------------------------------------------------------------------------------------------------------------------------------------------------------------------------------------------------------|
|                    |                             |          |    |                                                                                                                                                                         |          |    | ENSMUSG00000039952, ENSMUSG00000021909,<br>ENSMUSG00000006457, ENSMUSG00000025172,<br>ENSMUSG00000031972, ENSMUSG00000017300,<br>ENSMUSG00000056328, ENSMUSG00000041361,<br>ENSMUSG00000061086, ENSMUSG00000067653,<br>ENSMUSG00000032839, ENSMUSG00000006574,<br>ENSMUSG00000032060, ENSMUSG00000007877,<br>ENSMUSG00000020469, ENSMUSG00000040752,<br>ENSMUSG00000064179, ENSMUSG00000035458,<br>ENSMUSG00000027077, ENSMUSG00000091898,<br>ENSMUSG00000053093, ENSMUSG00000061723,<br>ENSMUSG00000031097, ENSMUSG00000028116,<br>ENSMUSG00000092137, ENSMUSG00000045103,<br>ENSMUSG00000041476, ENSMUSG00000059741,<br>ENSMUSG00000030554, ENSMUSG00000026418,<br>ENSMUSG00000049173, ENSMUSG00000052374 |
| GO:<br>0042<br>612 | MHC class I protein complex | 7.51E-05 | 7  | ENSMUSG00000073411, ENSMUSG00000060802,<br>ENSMUSG00000035929, ENSMUSG00000061232,<br>ENSMUSG00000067212, ENSMUSG00000060550,<br>ENSMUSG00000073409                     | 1        | 0  |                                                                                                                                                                                                                                                                                                                                                                                                                                                                                                                                                                                                                                                                                                             |
| GO:<br>0043<br>230 | extracellular organelle     | 3.24E-05 | 8  | ENSMUSG00000040253, ENSMUSG00000028270,<br>ENSMUSG00000028269, ENSMUSG00000069874,<br>ENSMUSG00000029298, ENSMUSG00000079362,<br>ENSMUSG00000054072, ENSMUSG00000028268 | 1        | 3  | ENSMUSG00000031134, ENSMUSG00000027376,<br>ENSMUSG00000018566                                                                                                                                                                                                                                                                                                                                                                                                                                                                                                                                                                                                                                               |
| GO:<br>0005        | extracellular space         | 9.15E-14 | 79 | ENSMUSG00000060802, ENSMUSG00000058755,<br>ENSMUSG00000022026, ENSMUSG00000009185,                                                                                      | 8.34E-07 | 66 | ENSMUSG00000033327, ENSMUSG00000023328,<br>ENSMUSG00000026715, ENSMUSG0000002588,                                                                                                                                                                                                                                                                                                                                                                                                                                                                                                                                                                                                                           |

ENSMUSG0000003617, ENSMUSG00000016529,  
ENSMUSG00000028613, ENSMUSG00000000392,  
ENSMUSG00000018930, ENSMUSG00000000817,  
ENSMUSG00000020053, ENSMUSG00000030895,  
ENSMUSG00000021091, ENSMUSG00000000182,  
ENSMUSG00000034855, ENSMUSG00000079019,  
ENSMUSG00000044701, ENSMUSG00000018920,  
ENSMUSG0000006403, ENSMUSG00000070427,  
ENSMUSG0000005800, ENSMUSG0000002992,  
ENSMUSG00000035493, ENSMUSG00000022548,  
ENSMUSG00000050578, ENSMUSG00000035373,  
ENSMUSG00000038357, ENSMUSG00000000982,  
ENSMUSG00000057465, ENSMUSG00000029304,  
ENSMUSG00000038067, ENSMUSG00000030218,  
ENSMUSG00000023913, ENSMUSG00000026582,  
ENSMUSG00000079620, ENSMUSG00000021614,  
ENSMUSG00000048806, ENSMUSG00000029380,  
ENSMUSG00000021451, ENSMUSG00000036905,  
ENSMUSG00000025044, ENSMUSG00000035352,  
ENSMUSG00000026822, ENSMUSG00000058427,  
ENSMUSG00000060747, ENSMUSG00000029379,  
ENSMUSG00000029417, ENSMUSG00000046845,  
ENSMUSG00000029377, ENSMUSG00000029811,  
ENSMUSG00000051439, ENSMUSG00000074115,  
ENSMUSG00000029378, ENSMUSG00000035385,  
ENSMUSG00000040017, ENSMUSG00000030413,

ENSMUSG00000039952, ENSMUSG00000044820,  
ENSMUSG00000090639, ENSMUSG00000026983,  
ENSMUSG00000039278, ENSMUSG00000026874,  
ENSMUSG00000032332, ENSMUSG00000039004,  
ENSMUSG00000033208, ENSMUSG00000026668,  
ENSMUSG00000010051, ENSMUSG00000022871,  
ENSMUSG00000017697, ENSMUSG00000061808,  
ENSMUSG00000037010, ENSMUSG00000022878,  
ENSMUSG0000004892, ENSMUSG00000059201,  
ENSMUSG00000022868, ENSMUSG00000026984,  
ENSMUSG00000064057, ENSMUSG00000033544,  
ENSMUSG0000001494, ENSMUSG00000000049,  
ENSMUSG00000024990, ENSMUSG00000032083,  
ENSMUSG00000015405, ENSMUSG00000031780,  
ENSMUSG00000059481, ENSMUSG00000054196,  
ENSMUSG00000031980, ENSMUSG00000031380,  
ENSMUSG00000040488, ENSMUSG00000012705,  
ENSMUSG00000029368, ENSMUSG00000033831,  
ENSMUSG00000061780, ENSMUSG00000031841,  
ENSMUSG00000041012, ENSMUSG00000021319,  
ENSMUSG00000032554, ENSMUSG00000024028,  
ENSMUSG00000041559, ENSMUSG00000023336,  
ENSMUSG0000005705, ENSMUSG00000020427,  
ENSMUSG00000022996, ENSMUSG00000030359,  
ENSMUSG00000074336, ENSMUSG00000025784,  
ENSMUSG00000024386, ENSMUSG00000029019,

|                    |                |          |     |                                                                                                                                                                                                                                                                                                                                                                                                                                                                                                             |             |     |                                                                                                                                                                                                                                                                                                                                                                                                                       |
|--------------------|----------------|----------|-----|-------------------------------------------------------------------------------------------------------------------------------------------------------------------------------------------------------------------------------------------------------------------------------------------------------------------------------------------------------------------------------------------------------------------------------------------------------------------------------------------------------------|-------------|-----|-----------------------------------------------------------------------------------------------------------------------------------------------------------------------------------------------------------------------------------------------------------------------------------------------------------------------------------------------------------------------------------------------------------------------|
|                    |                |          |     | ENSMUSG00000026166, ENSMUSG00000027398,<br>ENSMUSG00000030117, ENSMUSG00000028362,<br>ENSMUSG00000041324, ENSMUSG00000055170,<br>ENSMUSG00000039899, ENSMUSG00000035042,<br>ENSMUSG00000026573, ENSMUSG00000076612,<br>ENSMUSG00000004296, ENSMUSG00000026981,<br>ENSMUSG00000040026, ENSMUSG00000018486,<br>ENSMUSG00000023078, ENSMUSG00000029371,<br>ENSMUSG00000034394, ENSMUSG00000024401,<br>ENSMUSG00000090231, ENSMUSG00000026580,<br>ENSMUSG00000025746, ENSMUSG00000030111,<br>ENSMUSG00000020010 |             |     | ENSMUSG00000074264, ENSMUSG00000019326,<br>ENSMUSG00000023046, ENSMUSG00000024653,<br>ENSMUSG00000032081, ENSMUSG00000035540,<br>ENSMUSG00000062778, ENSMUSG00000058914,<br>ENSMUSG00000060962, ENSMUSG00000023235                                                                                                                                                                                                    |
| GO:<br>0005<br>938 | cell cortex    | 1        | 4   | ENSMUSG00000026582, ENSMUSG00000032322,<br>ENSMUSG00000002307, ENSMUSG00000035683                                                                                                                                                                                                                                                                                                                                                                                                                           | 0.009441919 | 19  | ENSMUSG00000068270, ENSMUSG00000033831,<br>ENSMUSG00000025889, ENSMUSG00000033196,<br>ENSMUSG00000054422, ENSMUSG00000007815,<br>ENSMUSG00000032010, ENSMUSG00000025656,<br>ENSMUSG00000041361, ENSMUSG00000092137,<br>ENSMUSG00000025812, ENSMUSG00000055561,<br>ENSMUSG00000032216, ENSMUSG00000006574,<br>ENSMUSG00000032064, ENSMUSG00000055632,<br>ENSMUSG00000030244, ENSMUSG00000052374,<br>ENSMUSG00000026532 |
| GO:<br>0071<br>944 | cell periphery | 1.06E-06 | 204 | ENSMUSG00000039364, ENSMUSG00000017716,<br>ENSMUSG00000027995, ENSMUSG00000031098,<br>ENSMUSG00000048534, ENSMUSG00000027699,<br>ENSMUSG00000003617, ENSMUSG00000024857,                                                                                                                                                                                                                                                                                                                                    | 0.513064227 | 180 | ENSMUSG00000039956, ENSMUSG00000030302,<br>ENSMUSG00000032547, ENSMUSG00000032452,<br>ENSMUSG00000025889, ENSMUSG00000054422,<br>ENSMUSG00000023328, ENSMUSG00000007122,                                                                                                                                                                                                                                              |

|  |  |  |                                                                                                                                                                                                                                                                                                                                                                                                                                                                                                                                                                                                                                                                                                                                                                                                                                                                                                                                                                                                                                                                                                                                                            |  |  |                                                                                                                                                                                                                                                                                                                                                                                                                                                                                                                                                                                                                                                                                                                                                                                                                                                                                                                                                                                                                                                                                                                                                         |
|--|--|--|------------------------------------------------------------------------------------------------------------------------------------------------------------------------------------------------------------------------------------------------------------------------------------------------------------------------------------------------------------------------------------------------------------------------------------------------------------------------------------------------------------------------------------------------------------------------------------------------------------------------------------------------------------------------------------------------------------------------------------------------------------------------------------------------------------------------------------------------------------------------------------------------------------------------------------------------------------------------------------------------------------------------------------------------------------------------------------------------------------------------------------------------------------|--|--|---------------------------------------------------------------------------------------------------------------------------------------------------------------------------------------------------------------------------------------------------------------------------------------------------------------------------------------------------------------------------------------------------------------------------------------------------------------------------------------------------------------------------------------------------------------------------------------------------------------------------------------------------------------------------------------------------------------------------------------------------------------------------------------------------------------------------------------------------------------------------------------------------------------------------------------------------------------------------------------------------------------------------------------------------------------------------------------------------------------------------------------------------------|
|  |  |  | ENSMUSG00000049103, ENSMUSG00000061232,<br>ENSMUSG00000028613, ENSMUSG00000053977,<br>ENSMUSG00000058728, ENSMUSG00000050232,<br>ENSMUSG00000022831, ENSMUSG00000047293,<br>ENSMUSG00000020848, ENSMUSG00000000817,<br>ENSMUSG00000030786, ENSMUSG00000028071,<br>ENSMUSG00000040264, ENSMUSG00000037321,<br>ENSMUSG00000055541, ENSMUSG00000030156,<br>ENSMUSG00000028262, ENSMUSG00000053395,<br>ENSMUSG00000025473, ENSMUSG00000045322,<br>ENSMUSG00000030954, ENSMUSG00000027322,<br>ENSMUSG00000025492, ENSMUSG00000027219,<br>ENSMUSG00000055994, ENSMUSG00000030149,<br>ENSMUSG00000009292, ENSMUSG00000025739,<br>ENSMUSG00000002307, ENSMUSG00000026656,<br>ENSMUSG00000029075, ENSMUSG00000030124,<br>ENSMUSG00000026582, ENSMUSG00000022094,<br>ENSMUSG00000052212, ENSMUSG00000028068,<br>ENSMUSG00000058818, ENSMUSG00000047330,<br>ENSMUSG00000071715, ENSMUSG00000030187,<br>ENSMUSG00000026009, ENSMUSG00000040528,<br>ENSMUSG00000071005, ENSMUSG00000038209,<br>ENSMUSG00000029377, ENSMUSG00000047798,<br>ENSMUSG00000029811, ENSMUSG00000037202,<br>ENSMUSG00000051439, ENSMUSG00000038179,<br>ENSMUSG00000073406, ENSMUSG00000053063, |  |  | ENSMUSG00000031881, ENSMUSG00000027849,<br>ENSMUSG00000090877, ENSMUSG00000039952,<br>ENSMUSG00000090639, ENSMUSG00000061393,<br>ENSMUSG00000071317, ENSMUSG00000073413,<br>ENSMUSG00000029195, ENSMUSG00000028356,<br>ENSMUSG00000027401, ENSMUSG00000061527,<br>ENSMUSG00000017697, ENSMUSG00000044322,<br>ENSMUSG00000032311, ENSMUSG00000032076,<br>ENSMUSG00000024027, ENSMUSG00000027376,<br>ENSMUSG00000019359, ENSMUSG00000056632,<br>ENSMUSG00000032034, ENSMUSG00000059412,<br>ENSMUSG00000028427, ENSMUSG00000059327,<br>ENSMUSG00000047182, ENSMUSG00000027820,<br>ENSMUSG00000032491, ENSMUSG00000017309,<br>ENSMUSG00000023013, ENSMUSG00000051431,<br>ENSMUSG00000050520, ENSMUSG00000033965,<br>ENSMUSG00000059481, ENSMUSG00000031997,<br>ENSMUSG0000006235, ENSMUSG00000052374,<br>ENSMUSG00000055632, ENSMUSG00000019894,<br>ENSMUSG00000034774, ENSMUSG00000045775,<br>ENSMUSG00000040412, ENSMUSG00000033831,<br>ENSMUSG00000038064, ENSMUSG00000033196,<br>ENSMUSG00000008153, ENSMUSG00000061928,<br>ENSMUSG00000031841, ENSMUSG00000032554,<br>ENSMUSG00000033577, ENSMUSG0000006269,<br>ENSMUSG0000006457, ENSMUSG00000041688, |
|--|--|--|------------------------------------------------------------------------------------------------------------------------------------------------------------------------------------------------------------------------------------------------------------------------------------------------------------------------------------------------------------------------------------------------------------------------------------------------------------------------------------------------------------------------------------------------------------------------------------------------------------------------------------------------------------------------------------------------------------------------------------------------------------------------------------------------------------------------------------------------------------------------------------------------------------------------------------------------------------------------------------------------------------------------------------------------------------------------------------------------------------------------------------------------------------|--|--|---------------------------------------------------------------------------------------------------------------------------------------------------------------------------------------------------------------------------------------------------------------------------------------------------------------------------------------------------------------------------------------------------------------------------------------------------------------------------------------------------------------------------------------------------------------------------------------------------------------------------------------------------------------------------------------------------------------------------------------------------------------------------------------------------------------------------------------------------------------------------------------------------------------------------------------------------------------------------------------------------------------------------------------------------------------------------------------------------------------------------------------------------------|



|  |  |  |                                                                                                                                                                                                                                                                                                                                                                                                                                                                                                                                                                                                                                                                                                                                                                                                                                                                                                                                                                                                                                                                                                                                                          |  |                                                                                                                                                                                                                                                                                                                                                                                                                                                                                                                                                                                                                                                                                                                                                                                                                                                                                                                                                                                                                                                                                                                                                          |
|--|--|--|----------------------------------------------------------------------------------------------------------------------------------------------------------------------------------------------------------------------------------------------------------------------------------------------------------------------------------------------------------------------------------------------------------------------------------------------------------------------------------------------------------------------------------------------------------------------------------------------------------------------------------------------------------------------------------------------------------------------------------------------------------------------------------------------------------------------------------------------------------------------------------------------------------------------------------------------------------------------------------------------------------------------------------------------------------------------------------------------------------------------------------------------------------|--|----------------------------------------------------------------------------------------------------------------------------------------------------------------------------------------------------------------------------------------------------------------------------------------------------------------------------------------------------------------------------------------------------------------------------------------------------------------------------------------------------------------------------------------------------------------------------------------------------------------------------------------------------------------------------------------------------------------------------------------------------------------------------------------------------------------------------------------------------------------------------------------------------------------------------------------------------------------------------------------------------------------------------------------------------------------------------------------------------------------------------------------------------------|
|  |  |  | ENSMUSG00000079451, ENSMUSG00000075602,<br>ENSMUSG00000048031, ENSMUSG00000001901,<br>ENSMUSG00000047230, ENSMUSG00000028217,<br>ENSMUSG00000059089, ENSMUSG00000062593,<br>ENSMUSG00000061577, ENSMUSG00000016496,<br>ENSMUSG00000013643, ENSMUSG00000055170,<br>ENSMUSG00000028965, ENSMUSG00000068227,<br>ENSMUSG00000027843, ENSMUSG00000067341,<br>ENSMUSG00000058715, ENSMUSG00000030077,<br>ENSMUSG00000024124, ENSMUSG00000026475,<br>ENSMUSG00000000791, ENSMUSG00000050896,<br>ENSMUSG00000015947, ENSMUSG00000021624,<br>ENSMUSG00000018486, ENSMUSG00000023903,<br>ENSMUSG00000037440, ENSMUSG00000079298,<br>ENSMUSG00000026358, ENSMUSG00000024401,<br>ENSMUSG00000073409, ENSMUSG00000026580,<br>ENSMUSG00000025746, ENSMUSG00000048498,<br>ENSMUSG00000067610, ENSMUSG00000053101,<br>ENSMUSG00000038304, ENSMUSG00000079700,<br>ENSMUSG0000004328, ENSMUSG00000022583,<br>ENSMUSG00000026271, ENSMUSG00000060802,<br>ENSMUSG0000001773, ENSMUSG00000058755,<br>ENSMUSG00000024112, ENSMUSG00000046908,<br>ENSMUSG00000047197, ENSMUSG00000000392,<br>ENSMUSG00000026073, ENSMUSG00000060550,<br>ENSMUSG00000059994, ENSMUSG00000028072, |  | ENSMUSG00000052698, ENSMUSG00000032232,<br>ENSMUSG00000031996, ENSMUSG00000047797,<br>ENSMUSG00000022996, ENSMUSG00000031146,<br>ENSMUSG00000019278, ENSMUSG00000035776,<br>ENSMUSG00000032216, ENSMUSG0000006574,<br>ENSMUSG00000041523, ENSMUSG00000032060,<br>ENSMUSG00000030244, ENSMUSG00000047216,<br>ENSMUSG00000029361, ENSMUSG00000032528,<br>ENSMUSG00000038119, ENSMUSG00000073424,<br>ENSMUSG00000040752, ENSMUSG00000023011,<br>ENSMUSG00000019326, ENSMUSG00000010064,<br>ENSMUSG0000001946, ENSMUSG00000053093,<br>ENSMUSG00000035459, ENSMUSG00000021573,<br>ENSMUSG00000025812, ENSMUSG00000045103,<br>ENSMUSG00000041476, ENSMUSG00000031377,<br>ENSMUSG00000026961, ENSMUSG00000040808,<br>ENSMUSG00000010047, ENSMUSG00000020123,<br>ENSMUSG00000034783, ENSMUSG00000022491,<br>ENSMUSG00000026304, ENSMUSG00000032511,<br>ENSMUSG00000057454, ENSMUSG00000020524,<br>ENSMUSG00000026824, ENSMUSG00000030865,<br>ENSMUSG00000067951, ENSMUSG00000026874,<br>ENSMUSG00000031209, ENSMUSG00000031176,<br>ENSMUSG00000032839, ENSMUSG00000060579,<br>ENSMUSG00000029193, ENSMUSG00000079355,<br>ENSMUSG00000040055, ENSMUSG00000013076, |
|--|--|--|----------------------------------------------------------------------------------------------------------------------------------------------------------------------------------------------------------------------------------------------------------------------------------------------------------------------------------------------------------------------------------------------------------------------------------------------------------------------------------------------------------------------------------------------------------------------------------------------------------------------------------------------------------------------------------------------------------------------------------------------------------------------------------------------------------------------------------------------------------------------------------------------------------------------------------------------------------------------------------------------------------------------------------------------------------------------------------------------------------------------------------------------------------|--|----------------------------------------------------------------------------------------------------------------------------------------------------------------------------------------------------------------------------------------------------------------------------------------------------------------------------------------------------------------------------------------------------------------------------------------------------------------------------------------------------------------------------------------------------------------------------------------------------------------------------------------------------------------------------------------------------------------------------------------------------------------------------------------------------------------------------------------------------------------------------------------------------------------------------------------------------------------------------------------------------------------------------------------------------------------------------------------------------------------------------------------------------------|

|  |  |                                                                                                                                                                                                                                                                                                                                                                                                                                                                                                                                                                                                                                                                                                                                                                                                                                                                                                                                                                                                                                                                                                                                                           |  |                                                                                                                                                                                                                                                                                                                                                                                                                                                                                                                                                                                                                                                                                                                                                                                                                                                                                                                                                                                                                                                                                                                                                            |
|--|--|-----------------------------------------------------------------------------------------------------------------------------------------------------------------------------------------------------------------------------------------------------------------------------------------------------------------------------------------------------------------------------------------------------------------------------------------------------------------------------------------------------------------------------------------------------------------------------------------------------------------------------------------------------------------------------------------------------------------------------------------------------------------------------------------------------------------------------------------------------------------------------------------------------------------------------------------------------------------------------------------------------------------------------------------------------------------------------------------------------------------------------------------------------------|--|------------------------------------------------------------------------------------------------------------------------------------------------------------------------------------------------------------------------------------------------------------------------------------------------------------------------------------------------------------------------------------------------------------------------------------------------------------------------------------------------------------------------------------------------------------------------------------------------------------------------------------------------------------------------------------------------------------------------------------------------------------------------------------------------------------------------------------------------------------------------------------------------------------------------------------------------------------------------------------------------------------------------------------------------------------------------------------------------------------------------------------------------------------|
|  |  | ENSMUSG00000020684, ENSMUSG00000078452,<br>ENSMUSG00000025804, ENSMUSG00000034652,<br>ENSMUSG00000046718, ENSMUSG00000051498,<br>ENSMUSG00000020651, ENSMUSG00000044811,<br>ENSMUSG00000029816, ENSMUSG00000032586,<br>ENSMUSG00000034855, ENSMUSG00000030651,<br>ENSMUSG00000026770, ENSMUSG00000033470,<br>ENSMUSG00000033031, ENSMUSG00000034641,<br>ENSMUSG00000040133, ENSMUSG00000040751,<br>ENSMUSG00000032322, ENSMUSG00000030525,<br>ENSMUSG00000040552, ENSMUSG00000028270,<br>ENSMUSG00000051378, ENSMUSG00000022824,<br>ENSMUSG00000050241, ENSMUSG00000028459,<br>ENSMUSG0000003283, ENSMUSG00000022586,<br>ENSMUSG00000056025, ENSMUSG00000079620,<br>ENSMUSG00000016498, ENSMUSG00000044138,<br>ENSMUSG00000024397, ENSMUSG00000022582,<br>ENSMUSG00000022587, ENSMUSG00000036362,<br>ENSMUSG00000044583, ENSMUSG00000053219,<br>ENSMUSG00000021451, ENSMUSG00000038963,<br>ENSMUSG00000025044, ENSMUSG00000071311,<br>ENSMUSG00000024791, ENSMUSG00000029417,<br>ENSMUSG00000071068, ENSMUSG00000034730,<br>ENSMUSG00000024696, ENSMUSG00000030677,<br>ENSMUSG00000073411, ENSMUSG00000023992,<br>ENSMUSG00000017146, ENSMUSG00000075122, |  | ENSMUSG00000066072, ENSMUSG00000032086,<br>ENSMUSG00000030278, ENSMUSG00000038201,<br>ENSMUSG00000044338, ENSMUSG00000050164,<br>ENSMUSG00000022040, ENSMUSG00000092137,<br>ENSMUSG00000029205, ENSMUSG00000024471,<br>ENSMUSG00000032548, ENSMUSG00000015405,<br>ENSMUSG00000049281, ENSMUSG00000025265,<br>ENSMUSG00000032531, ENSMUSG00000068270,<br>ENSMUSG00000025810, ENSMUSG00000049556,<br>ENSMUSG00000032366, ENSMUSG00000055980,<br>ENSMUSG00000046480, ENSMUSG00000001943,<br>ENSMUSG00000074505, ENSMUSG00000059898,<br>ENSMUSG00000057182, ENSMUSG00000032010,<br>ENSMUSG00000001986, ENSMUSG00000078658,<br>ENSMUSG00000061259, ENSMUSG00000018566,<br>ENSMUSG00000021055, ENSMUSG00000036813,<br>ENSMUSG00000041361, ENSMUSG00000031489,<br>ENSMUSG00000001300, ENSMUSG00000055561,<br>ENSMUSG00000032064, ENSMUSG00000022595,<br>ENSMUSG00000037681, ENSMUSG00000046834,<br>ENSMUSG00000023092, ENSMUSG00000025153,<br>ENSMUSG00000073465, ENSMUSG00000026532,<br>ENSMUSG00000051726, ENSMUSG00000055653,<br>ENSMUSG00000032570, ENSMUSG00000032911,<br>ENSMUSG00000020183, ENSMUSG00000007815,<br>ENSMUSG00000041748, ENSMUSG00000061273, |
|--|--|-----------------------------------------------------------------------------------------------------------------------------------------------------------------------------------------------------------------------------------------------------------------------------------------------------------------------------------------------------------------------------------------------------------------------------------------------------------------------------------------------------------------------------------------------------------------------------------------------------------------------------------------------------------------------------------------------------------------------------------------------------------------------------------------------------------------------------------------------------------------------------------------------------------------------------------------------------------------------------------------------------------------------------------------------------------------------------------------------------------------------------------------------------------|--|------------------------------------------------------------------------------------------------------------------------------------------------------------------------------------------------------------------------------------------------------------------------------------------------------------------------------------------------------------------------------------------------------------------------------------------------------------------------------------------------------------------------------------------------------------------------------------------------------------------------------------------------------------------------------------------------------------------------------------------------------------------------------------------------------------------------------------------------------------------------------------------------------------------------------------------------------------------------------------------------------------------------------------------------------------------------------------------------------------------------------------------------------------|

|                    |               |   |    |                                                                                                                                                                                                                                                                                                                                                                                                                                                                                                                                                                                                                                                                                                                                                                                                                                                                                                                                     |          |    |                                                                                                                                                                                                                                                                                                                                                                          |
|--------------------|---------------|---|----|-------------------------------------------------------------------------------------------------------------------------------------------------------------------------------------------------------------------------------------------------------------------------------------------------------------------------------------------------------------------------------------------------------------------------------------------------------------------------------------------------------------------------------------------------------------------------------------------------------------------------------------------------------------------------------------------------------------------------------------------------------------------------------------------------------------------------------------------------------------------------------------------------------------------------------------|----------|----|--------------------------------------------------------------------------------------------------------------------------------------------------------------------------------------------------------------------------------------------------------------------------------------------------------------------------------------------------------------------------|
|                    |               |   |    | <p>ENSMUSG0000004952, ENSMUSG00000028874,<br/> ENSMUSG00000029915, ENSMUSG00000030365,<br/> ENSMUSG00000026011, ENSMUSG00000030167,<br/> ENSMUSG00000026285, ENSMUSG00000019320,<br/> ENSMUSG00000079227, ENSMUSG00000049608,<br/> ENSMUSG00000040010, ENSMUSG00000036469,<br/> ENSMUSG00000035683, ENSMUSG00000067212,<br/> ENSMUSG00000057135, ENSMUSG00000040033,<br/> ENSMUSG00000056529, ENSMUSG00000062082,<br/> ENSMUSG00000024349, ENSMUSG00000056494,<br/> ENSMUSG00000035929, ENSMUSG00000043811,<br/> ENSMUSG00000024798, ENSMUSG00000022901,<br/> ENSMUSG00000021886, ENSMUSG00000044827,<br/> ENSMUSG00000038943, ENSMUSG00000050075,<br/> ENSMUSG00000056290, ENSMUSG00000072572,<br/> ENSMUSG00000046879, ENSMUSG00000034422,<br/> ENSMUSG00000012428, ENSMUSG00000024339,<br/> ENSMUSG00000041347, ENSMUSG00000045763,<br/> ENSMUSG00000063234, ENSMUSG00000026177,<br/> ENSMUSG00000020010, ENSMUSG00000022584</p> |          |    | <p>ENSMUSG00000043165, ENSMUSG00000029669,<br/> ENSMUSG00000025656, ENSMUSG00000019478,<br/> ENSMUSG00000044359, ENSMUSG00000044287,<br/> ENSMUSG00000032377, ENSMUSG00000039114,<br/> ENSMUSG00000069441, ENSMUSG00000029862,<br/> ENSMUSG00000028036, ENSMUSG00000075307,<br/> ENSMUSG00000058022, ENSMUSG00000037624,<br/> ENSMUSG00000028307, ENSMUSG00000061974</p> |
| GO:<br>0030<br>054 | cell junction | 1 | 15 | <p>ENSMUSG00000045471, ENSMUSG00000003283,<br/> ENSMUSG00000048534, ENSMUSG00000047230,<br/> ENSMUSG00000049303, ENSMUSG00000028068,<br/> ENSMUSG00000027699, ENSMUSG00000050578,<br/> ENSMUSG00000030525, ENSMUSG00000047197,<br/> ENSMUSG00000029811, ENSMUSG00000024696,</p>                                                                                                                                                                                                                                                                                                                                                                                                                                                                                                                                                                                                                                                     | 6.51E-06 | 60 | <p>ENSMUSG00000038064, ENSMUSG00000070570,<br/> ENSMUSG00000023328, ENSMUSG00000032511,<br/> ENSMUSG00000061928, ENSMUSG00000027849,<br/> ENSMUSG00000020524, ENSMUSG00000059898,<br/> ENSMUSG00000039952, ENSMUSG00000071317,<br/> ENSMUSG0000006457, ENSMUSG00000001986,</p>                                                                                           |

|             |           |   |   |                                                               |          |    |                                                                                                                                                                                                                                                                                                                                                                                                                                                                                                                                                                                                                                                                                                                                                                                                                                                                                                                                                                                                                                                                     |
|-------------|-----------|---|---|---------------------------------------------------------------|----------|----|---------------------------------------------------------------------------------------------------------------------------------------------------------------------------------------------------------------------------------------------------------------------------------------------------------------------------------------------------------------------------------------------------------------------------------------------------------------------------------------------------------------------------------------------------------------------------------------------------------------------------------------------------------------------------------------------------------------------------------------------------------------------------------------------------------------------------------------------------------------------------------------------------------------------------------------------------------------------------------------------------------------------------------------------------------------------|
|             |           |   |   | ENSMUSG00000053395, ENSMUSG00000000392,<br>ENSMUSG00000030677 |          |    | ENSMUSG00000041688, ENSMUSG00000052698,<br>ENSMUSG00000032232, ENSMUSG00000027022,<br>ENSMUSG00000033595, ENSMUSG00000047797,<br>ENSMUSG00000056328, ENSMUSG00000041361,<br>ENSMUSG00000053310, ENSMUSG00000067653,<br>ENSMUSG00000035776, ENSMUSG00000026413,<br>ENSMUSG00000017697, ENSMUSG00000032064,<br>ENSMUSG00000057606, ENSMUSG00000044322,<br>ENSMUSG00000073465, ENSMUSG00000032076,<br>ENSMUSG00000040055, ENSMUSG00000040752,<br>ENSMUSG00000023011, ENSMUSG00000013076,<br>ENSMUSG00000031216, ENSMUSG00000031214,<br>ENSMUSG00000001946, ENSMUSG00000056632,<br>ENSMUSG00000039518, ENSMUSG00000030278,<br>ENSMUSG00000007815, ENSMUSG00000028427,<br>ENSMUSG00000053093, ENSMUSG00000021573,<br>ENSMUSG00000022040, ENSMUSG00000031144,<br>ENSMUSG00000092137, ENSMUSG00000025812,<br>ENSMUSG00000045103, ENSMUSG00000069441,<br>ENSMUSG00000029205, ENSMUSG00000041476,<br>ENSMUSG00000050520, ENSMUSG00000030554,<br>ENSMUSG00000031997, ENSMUSG00000052374,<br>ENSMUSG00000055632, ENSMUSG00000034774,<br>ENSMUSG00000032531, ENSMUSG00000061974 |
| GO:<br>0030 | myofibril | 1 | 0 |                                                               | 1.96E-23 | 42 | ENSMUSG00000009471, ENSMUSG00000030730,<br>ENSMUSG00000032366, ENSMUSG00000033196,                                                                                                                                                                                                                                                                                                                                                                                                                                                                                                                                                                                                                                                                                                                                                                                                                                                                                                                                                                                  |

|                    |                     |                 |    |                                                                                                                                                                |          |                                                                                                                                                                                                                                                                                                                                                                                                                                                                                                                                                                                                                                                                                                                                                                                        |                                                                                                                         |
|--------------------|---------------------|-----------------|----|----------------------------------------------------------------------------------------------------------------------------------------------------------------|----------|----------------------------------------------------------------------------------------------------------------------------------------------------------------------------------------------------------------------------------------------------------------------------------------------------------------------------------------------------------------------------------------------------------------------------------------------------------------------------------------------------------------------------------------------------------------------------------------------------------------------------------------------------------------------------------------------------------------------------------------------------------------------------------------|-------------------------------------------------------------------------------------------------------------------------|
| 016                |                     |                 |    |                                                                                                                                                                |          | ENSMUSG00000057003, ENSMUSG00000031312, ENSMUSG00000007122, ENSMUSG00000047419, ENSMUSG00000039952, ENSMUSG00000021909, ENSMUSG00000006457, ENSMUSG00000025172, ENSMUSG00000031972, ENSMUSG00000017300, ENSMUSG00000061816, ENSMUSG00000056328, ENSMUSG00000041361, ENSMUSG00000061086, ENSMUSG00000067653, ENSMUSG00000032839, ENSMUSG00000006574, ENSMUSG00000032060, ENSMUSG00000007877, ENSMUSG00000060180, ENSMUSG00000020469, ENSMUSG00000040752, ENSMUSG00000064179, ENSMUSG00000035458, ENSMUSG00000027077, ENSMUSG00000091898, ENSMUSG00000053093, ENSMUSG00000061723, ENSMUSG00000028116, ENSMUSG00000031097, ENSMUSG00000092137, ENSMUSG00000045103, ENSMUSG00000041476, ENSMUSG00000059741, ENSMUSG00000030554, ENSMUSG00000026418, ENSMUSG00000049173, ENSMUSG00000052374 |                                                                                                                         |
| GO:<br>0042<br>611 | MHC protein complex | 0.00063215<br>6 | 8  | ENSMUSG00000073411, ENSMUSG00000060802, ENSMUSG00000035929, ENSMUSG00000061232, ENSMUSG00000067341, ENSMUSG00000067212, ENSMUSG00000060550, ENSMUSG00000073409 | 1        | 0                                                                                                                                                                                                                                                                                                                                                                                                                                                                                                                                                                                                                                                                                                                                                                                      |                                                                                                                         |
| GO:<br>0000<br>267 | cell fraction       | 1               | 27 | ENSMUSG00000024079, ENSMUSG00000003665, ENSMUSG00000035042, ENSMUSG00000031444, ENSMUSG00000030525, ENSMUSG00000041431,                                        | 1.78E-06 | 88                                                                                                                                                                                                                                                                                                                                                                                                                                                                                                                                                                                                                                                                                                                                                                                     | ENSMUSG00000037686, ENSMUSG00000030302, ENSMUSG00000032547, ENSMUSG00000074254, ENSMUSG00000025889, ENSMUSG00000070570, |

|  |  |  |                                                                                                                                                                                                                                                                                                                                                                                                                                                                 |  |                                                                                                                                                                                                                                                                                                                                                                                                                                                                                                                                                                                                                                                                                                                                                                                                                                                                                                                                                                                                                                                                                                                                                           |
|--|--|--|-----------------------------------------------------------------------------------------------------------------------------------------------------------------------------------------------------------------------------------------------------------------------------------------------------------------------------------------------------------------------------------------------------------------------------------------------------------------|--|-----------------------------------------------------------------------------------------------------------------------------------------------------------------------------------------------------------------------------------------------------------------------------------------------------------------------------------------------------------------------------------------------------------------------------------------------------------------------------------------------------------------------------------------------------------------------------------------------------------------------------------------------------------------------------------------------------------------------------------------------------------------------------------------------------------------------------------------------------------------------------------------------------------------------------------------------------------------------------------------------------------------------------------------------------------------------------------------------------------------------------------------------------------|
|  |  |  | ENSMUSG0000003555, ENSMUSG00000026475,<br>ENSMUSG00000031891, ENSMUSG00000000982,<br>ENSMUSG00000020638, ENSMUSG00000031898,<br>ENSMUSG00000030148, ENSMUSG00000018930,<br>ENSMUSG00000036986, ENSMUSG00000039519,<br>ENSMUSG00000026580, ENSMUSG00000024339,<br>ENSMUSG00000020649, ENSMUSG00000021091,<br>ENSMUSG00000041347, ENSMUSG00000023045,<br>ENSMUSG00000037321, ENSMUSG00000041831,<br>ENSMUSG00000031551, ENSMUSG00000053219,<br>ENSMUSG00000032218 |  | ENSMUSG00000007122, ENSMUSG00000040867,<br>ENSMUSG00000020182, ENSMUSG00000090877,<br>ENSMUSG00000027849, ENSMUSG00000020524,<br>ENSMUSG00000002588, ENSMUSG00000039952,<br>ENSMUSG00000013418, ENSMUSG00000026874,<br>ENSMUSG00000032310, ENSMUSG00000032418,<br>ENSMUSG00000031812, ENSMUSG00000027513,<br>ENSMUSG00000028356, ENSMUSG00000010051,<br>ENSMUSG00000037071, ENSMUSG00000038776,<br>ENSMUSG00000032311, ENSMUSG00000032076,<br>ENSMUSG00000078597, ENSMUSG00000004892,<br>ENSMUSG00000066072, ENSMUSG00000052974,<br>ENSMUSG00000023019, ENSMUSG00000032086,<br>ENSMUSG00000040181, ENSMUSG00000059412,<br>ENSMUSG00000032315, ENSMUSG00000047182,<br>ENSMUSG00000027820, ENSMUSG00000044338,<br>ENSMUSG00000032491, ENSMUSG00000023013,<br>ENSMUSG00000015405, ENSMUSG00000030554,<br>ENSMUSG00000059481, ENSMUSG00000046814,<br>ENSMUSG00000024892, ENSMUSG00000050195,<br>ENSMUSG00000025175, ENSMUSG0000003053,<br>ENSMUSG00000030730, ENSMUSG00000024500,<br>ENSMUSG00000055980, ENSMUSG00000052911,<br>ENSMUSG00000057182, ENSMUSG00000031844,<br>ENSMUSG00000006269, ENSMUSG00000033577,<br>ENSMUSG00000038216, ENSMUSG00000001986, |
|--|--|--|-----------------------------------------------------------------------------------------------------------------------------------------------------------------------------------------------------------------------------------------------------------------------------------------------------------------------------------------------------------------------------------------------------------------------------------------------------------------|--|-----------------------------------------------------------------------------------------------------------------------------------------------------------------------------------------------------------------------------------------------------------------------------------------------------------------------------------------------------------------------------------------------------------------------------------------------------------------------------------------------------------------------------------------------------------------------------------------------------------------------------------------------------------------------------------------------------------------------------------------------------------------------------------------------------------------------------------------------------------------------------------------------------------------------------------------------------------------------------------------------------------------------------------------------------------------------------------------------------------------------------------------------------------|

|                    |                    |   |   |                                                                                                                                                                   |             |                                                                                                                                                                                                                                                                                                                                                                                                                                                                                                                                                                                                                                                                                                     |                                                                                                                                                                                                                                                                                                                                                                                                                                                                                                                   |
|--------------------|--------------------|---|---|-------------------------------------------------------------------------------------------------------------------------------------------------------------------|-------------|-----------------------------------------------------------------------------------------------------------------------------------------------------------------------------------------------------------------------------------------------------------------------------------------------------------------------------------------------------------------------------------------------------------------------------------------------------------------------------------------------------------------------------------------------------------------------------------------------------------------------------------------------------------------------------------------------------|-------------------------------------------------------------------------------------------------------------------------------------------------------------------------------------------------------------------------------------------------------------------------------------------------------------------------------------------------------------------------------------------------------------------------------------------------------------------------------------------------------------------|
|                    |                    |   |   |                                                                                                                                                                   |             | <p>ENSMUSG00000018566, ENSMUSG00000025037,<br/> ENSMUSG00000033595, ENSMUSG00000036813,<br/> ENSMUSG00000031489, ENSMUSG00000026691,<br/> ENSMUSG00000032216, ENSMUSG00000048142,<br/> ENSMUSG00000032060, ENSMUSG00000033765,<br/> ENSMUSG00000030244, ENSMUSG00000066071,<br/> ENSMUSG00000029361, ENSMUSG00000073424,<br/> ENSMUSG00000057880, ENSMUSG00000019326,<br/> ENSMUSG00000032570, ENSMUSG00000024039,<br/> ENSMUSG00000007815, ENSMUSG00000020990,<br/> ENSMUSG00000019478, ENSMUSG00000031144,<br/> ENSMUSG00000045103, ENSMUSG00000048758,<br/> ENSMUSG00000030747, ENSMUSG00000022206,<br/> ENSMUSG00000020532, ENSMUSG00000028307,<br/> ENSMUSG00000012187, ENSMUSG00000020475</p> |                                                                                                                                                                                                                                                                                                                                                                                                                                                                                                                   |
| GO:<br>0005<br>911 | cell-cell junction | 1 | 7 | <p>ENSMUSG00000047197, ENSMUSG00000029811,<br/> ENSMUSG00000048534, ENSMUSG00000047230,<br/> ENSMUSG00000028068, ENSMUSG00000027699,<br/> ENSMUSG000000050578</p> | 0.000489146 | 29                                                                                                                                                                                                                                                                                                                                                                                                                                                                                                                                                                                                                                                                                                  | <p>ENSMUSG00000013076, ENSMUSG00000038064,<br/> ENSMUSG00000001946, ENSMUSG00000056632,<br/> ENSMUSG00000039518, ENSMUSG00000032511,<br/> ENSMUSG00000061928, ENSMUSG00000007815,<br/> ENSMUSG00000059898, ENSMUSG00000039952,<br/> ENSMUSG00000028427, ENSMUSG00000071317,<br/> ENSMUSG00000041688, ENSMUSG00000052698,<br/> ENSMUSG00000032232, ENSMUSG00000047797,<br/> ENSMUSG00000056328, ENSMUSG00000025812,<br/> ENSMUSG00000069441, ENSMUSG00000067653,<br/> ENSMUSG000000050520, ENSMUSG00000026413,</p> |

|                    |                                  |          |    |                                                                                                                                                                                                                                                                                                           |          |   |                                                                                                                                                                                                |
|--------------------|----------------------------------|----------|----|-----------------------------------------------------------------------------------------------------------------------------------------------------------------------------------------------------------------------------------------------------------------------------------------------------------|----------|---|------------------------------------------------------------------------------------------------------------------------------------------------------------------------------------------------|
|                    |                                  |          |    |                                                                                                                                                                                                                                                                                                           |          |   | ENSMUSG00000031997, ENSMUSG00000044322,<br>ENSMUSG00000034774, ENSMUSG00000032531,<br>ENSMUSG00000032076, ENSMUSG00000040055,<br>ENSMUSG00000061974                                            |
| GO:<br>0018<br>995 | host                             | 1.79E-11 | 11 | ENSMUSG00000028269, ENSMUSG00000069874,<br>ENSMUSG00000079362, ENSMUSG00000028268,<br>ENSMUSG00000040253, ENSMUSG00000024339,<br>ENSMUSG00000028270, ENSMUSG00000029298,<br>ENSMUSG00000054072, ENSMUSG00000037321,<br>ENSMUSG00000034459                                                                 | 1        | 0 |                                                                                                                                                                                                |
| GO:<br>0000<br>777 | condensed chromosome kinetochore | 6.24E-07 | 10 | ENSMUSG00000017716, ENSMUSG00000030867,<br>ENSMUSG00000045273, ENSMUSG00000027379,<br>ENSMUSG00000024056, ENSMUSG00000040084,<br>ENSMUSG00000041431, ENSMUSG00000026605,<br>ENSMUSG00000036223, ENSMUSG00000069910                                                                                        | 1        | 0 |                                                                                                                                                                                                |
| GO:<br>0005<br>861 | troponin complex                 | 1        | 0  |                                                                                                                                                                                                                                                                                                           | 1.63E-08 | 8 | ENSMUSG00000061723, ENSMUSG00000031097,<br>ENSMUSG00000064179, ENSMUSG00000035458,<br>ENSMUSG00000091898, ENSMUSG00000026418,<br>ENSMUSG00000021909, ENSMUSG00000017300                        |
| GO:<br>0044<br>427 | chromosomal part                 | 5.16E-06 | 45 | ENSMUSG00000075266, ENSMUSG00000017716,<br>ENSMUSG00000069302, ENSMUSG00000015880,<br>ENSMUSG00000022034, ENSMUSG00000024791,<br>ENSMUSG00000045273, ENSMUSG00000026605,<br>ENSMUSG00000075031, ENSMUSG00000026646,<br>ENSMUSG00000005410, ENSMUSG00000030677,<br>ENSMUSG00000045328, ENSMUSG00000031004, | 1        | 9 | ENSMUSG00000031134, ENSMUSG00000009471,<br>ENSMUSG00000020889, ENSMUSG00000031245,<br>ENSMUSG00000062270, ENSMUSG00000046532,<br>ENSMUSG00000031176, ENSMUSG00000032216,<br>ENSMUSG00000025862 |



|                    |              |   |    |                                                                                                                                                                                                                                                                                                                                                                                                                                                                                                                                                                                                                                                                                                                            |             |     |                                                                                                                                                                                                                                                                                                                                                                                                                                                                     |
|--------------------|--------------|---|----|----------------------------------------------------------------------------------------------------------------------------------------------------------------------------------------------------------------------------------------------------------------------------------------------------------------------------------------------------------------------------------------------------------------------------------------------------------------------------------------------------------------------------------------------------------------------------------------------------------------------------------------------------------------------------------------------------------------------------|-------------|-----|---------------------------------------------------------------------------------------------------------------------------------------------------------------------------------------------------------------------------------------------------------------------------------------------------------------------------------------------------------------------------------------------------------------------------------------------------------------------|
|                    |              |   |    | <p>ENSMUSG00000028873, ENSMUSG00000058773,<br/> ENSMUSG00000021714, ENSMUSG00000002055,<br/> ENSMUSG00000068101, ENSMUSG00000027379,<br/> ENSMUSG00000024056, ENSMUSG00000035365,<br/> ENSMUSG00000027331, ENSMUSG00000029414,<br/> ENSMUSG00000026683, ENSMUSG00000069273,<br/> ENSMUSG0000001228, ENSMUSG00000026039,<br/> ENSMUSG00000070691, ENSMUSG00000041431,<br/> ENSMUSG00000040084, ENSMUSG00000036223,<br/> ENSMUSG0000002307, ENSMUSG00000069910,<br/> ENSMUSG00000025001, ENSMUSG00000031756,<br/> ENSMUSG00000020897, ENSMUSG00000005470,<br/> ENSMUSG00000028678, ENSMUSG00000030867,<br/> ENSMUSG00000074476, ENSMUSG00000017861,<br/> ENSMUSG00000063021, ENSMUSG00000023940,<br/> ENSMUSG00000041064</p> |             |     |                                                                                                                                                                                                                                                                                                                                                                                                                                                                     |
| GO:<br>0005<br>856 | cytoskeleton | 1 | 67 | <p>ENSMUSG00000017716, ENSMUSG00000079553,<br/> ENSMUSG00000015880, ENSMUSG00000050107,<br/> ENSMUSG00000027699, ENSMUSG00000024989,<br/> ENSMUSG00000068744, ENSMUSG00000019942,<br/> ENSMUSG00000006398, ENSMUSG00000002055,<br/> ENSMUSG00000022534, ENSMUSG00000067615,<br/> ENSMUSG00000027331, ENSMUSG00000053395,<br/> ENSMUSG00000025473, ENSMUSG00000028718,<br/> ENSMUSG00000032322, ENSMUSG00000030525,<br/> ENSMUSG00000041431, ENSMUSG00000027306,</p>                                                                                                                                                                                                                                                        | 0.000371108 | 106 | <p>ENSMUSG00000025889, ENSMUSG00000055775,<br/> ENSMUSG00000050463, ENSMUSG00000041984,<br/> ENSMUSG00000020524, ENSMUSG00000039952,<br/> ENSMUSG00000025597, ENSMUSG00000021909,<br/> ENSMUSG00000044156, ENSMUSG00000042451,<br/> ENSMUSG00000026668, ENSMUSG00000031812,<br/> ENSMUSG00000056328, ENSMUSG00000006777,<br/> ENSMUSG00000027401, ENSMUSG00000074673,<br/> ENSMUSG00000044041, ENSMUSG00000031176,<br/> ENSMUSG00000061527, ENSMUSG00000041991,</p> |

|  |  |  |                                                                                                                                                                                                                                                                                                                                                                                                                                                                                                                                                                                                                                                                                                                                                                                                                                                                                                                                                                                                                                                 |  |                                                                                                                                                                                                                                                                                                                                                                                                                                                                                                                                                                                                                                                                                                                                                                                                                                                                                                                                                                                                                                                                                                                                                          |
|--|--|--|-------------------------------------------------------------------------------------------------------------------------------------------------------------------------------------------------------------------------------------------------------------------------------------------------------------------------------------------------------------------------------------------------------------------------------------------------------------------------------------------------------------------------------------------------------------------------------------------------------------------------------------------------------------------------------------------------------------------------------------------------------------------------------------------------------------------------------------------------------------------------------------------------------------------------------------------------------------------------------------------------------------------------------------------------|--|----------------------------------------------------------------------------------------------------------------------------------------------------------------------------------------------------------------------------------------------------------------------------------------------------------------------------------------------------------------------------------------------------------------------------------------------------------------------------------------------------------------------------------------------------------------------------------------------------------------------------------------------------------------------------------------------------------------------------------------------------------------------------------------------------------------------------------------------------------------------------------------------------------------------------------------------------------------------------------------------------------------------------------------------------------------------------------------------------------------------------------------------------------|
|  |  |  | ENSMUSG00000037313, ENSMUSG00000024795,<br>ENSMUSG00000037474, ENSMUSG00000026656,<br>ENSMUSG00000051378, ENSMUSG00000002068,<br>ENSMUSG00000020897, ENSMUSG00000050635,<br>ENSMUSG00000017499, ENSMUSG00000003283,<br>ENSMUSG00000026582, ENSMUSG00000037544,<br>ENSMUSG00000028678, ENSMUSG00000030867,<br>ENSMUSG00000012443, ENSMUSG00000079597,<br>ENSMUSG00000024397, ENSMUSG00000067613,<br>ENSMUSG00000058290, ENSMUSG00000033952,<br>ENSMUSG00000027496, ENSMUSG00000026605,<br>ENSMUSG00000024696, ENSMUSG00000030677,<br>ENSMUSG00000045328, ENSMUSG00000028873,<br>ENSMUSG00000017146, ENSMUSG00000041498,<br>ENSMUSG00000028874, ENSMUSG00000019845,<br>ENSMUSG00000027469, ENSMUSG00000037725,<br>ENSMUSG00000048327, ENSMUSG00000029414,<br>ENSMUSG00000054215, ENSMUSG00000036223,<br>ENSMUSG00000023015, ENSMUSG00000026981,<br>ENSMUSG00000069910, ENSMUSG00000038943,<br>ENSMUSG00000022385, ENSMUSG00000067614,<br>ENSMUSG00000072082, ENSMUSG00000023940,<br>ENSMUSG00000036768, ENSMUSG00000026779,<br>ENSMUSG00000032218 |  | ENSMUSG00000037287, ENSMUSG00000061397,<br>ENSMUSG00000046095, ENSMUSG00000008035,<br>ENSMUSG00000001349, ENSMUSG00000064179,<br>ENSMUSG00000019359, ENSMUSG00000062380,<br>ENSMUSG00000031214, ENSMUSG00000027470,<br>ENSMUSG00000091898, ENSMUSG00000048455,<br>ENSMUSG00000056267, ENSMUSG00000014846,<br>ENSMUSG00000047746, ENSMUSG00000061723,<br>ENSMUSG00000039585, ENSMUSG00000092137,<br>ENSMUSG00000067594, ENSMUSG00000024471,<br>ENSMUSG00000020061, ENSMUSG00000059741,<br>ENSMUSG00000030554, ENSMUSG00000031355,<br>ENSMUSG00000079480, ENSMUSG00000041729,<br>ENSMUSG00000052374, ENSMUSG00000025265,<br>ENSMUSG00000068270, ENSMUSG00000025810,<br>ENSMUSG00000063651, ENSMUSG00000032366,<br>ENSMUSG00000033196, ENSMUSG00000024500,<br>ENSMUSG00000057003, ENSMUSG00000030672,<br>ENSMUSG00000032010, ENSMUSG00000033577,<br>ENSMUSG0000006457, ENSMUSG00000001986,<br>ENSMUSG00000041688, ENSMUSG00000078658,<br>ENSMUSG00000052698, ENSMUSG00000031972,<br>ENSMUSG00000032232, ENSMUSG00000061816,<br>ENSMUSG00000017300, ENSMUSG00000064201,<br>ENSMUSG00000041361, ENSMUSG00000067653,<br>ENSMUSG00000020623, ENSMUSG0000006574, |
|--|--|--|-------------------------------------------------------------------------------------------------------------------------------------------------------------------------------------------------------------------------------------------------------------------------------------------------------------------------------------------------------------------------------------------------------------------------------------------------------------------------------------------------------------------------------------------------------------------------------------------------------------------------------------------------------------------------------------------------------------------------------------------------------------------------------------------------------------------------------------------------------------------------------------------------------------------------------------------------------------------------------------------------------------------------------------------------|--|----------------------------------------------------------------------------------------------------------------------------------------------------------------------------------------------------------------------------------------------------------------------------------------------------------------------------------------------------------------------------------------------------------------------------------------------------------------------------------------------------------------------------------------------------------------------------------------------------------------------------------------------------------------------------------------------------------------------------------------------------------------------------------------------------------------------------------------------------------------------------------------------------------------------------------------------------------------------------------------------------------------------------------------------------------------------------------------------------------------------------------------------------------|

|                    |                          |                 |    |                                                                                                                                                                                                                                                                                                                                                                                                                         |   |    |                                                                                                                                                                                                                                                                                                                                                                                                                                                                                                                                                                                                                                                                                                                                                                                            |
|--------------------|--------------------------|-----------------|----|-------------------------------------------------------------------------------------------------------------------------------------------------------------------------------------------------------------------------------------------------------------------------------------------------------------------------------------------------------------------------------------------------------------------------|---|----|--------------------------------------------------------------------------------------------------------------------------------------------------------------------------------------------------------------------------------------------------------------------------------------------------------------------------------------------------------------------------------------------------------------------------------------------------------------------------------------------------------------------------------------------------------------------------------------------------------------------------------------------------------------------------------------------------------------------------------------------------------------------------------------------|
|                    |                          |                 |    |                                                                                                                                                                                                                                                                                                                                                                                                                         |   |    | <p>ENSMUSG00000078252, ENSMUSG00000032060,<br/> ENSMUSG00000046834, ENSMUSG00000030244,<br/> ENSMUSG00000060180, ENSMUSG00000029361,<br/> ENSMUSG00000073465, ENSMUSG00000000881,<br/> ENSMUSG00000020469, ENSMUSG00000026532,<br/> ENSMUSG00000040752, ENSMUSG00000035458,<br/> ENSMUSG00000089996, ENSMUSG00000063661,<br/> ENSMUSG0000001134, ENSMUSG00000007815,<br/> ENSMUSG0000005355, ENSMUSG00000053093,<br/> ENSMUSG00000033590, ENSMUSG00000021573,<br/> ENSMUSG00000068697, ENSMUSG00000043165,<br/> ENSMUSG00000028116, ENSMUSG00000031097,<br/> ENSMUSG0000000266, ENSMUSG00000025812,<br/> ENSMUSG00000045103, ENSMUSG00000034467,<br/> ENSMUSG00000075307, ENSMUSG00000059668,<br/> ENSMUSG00000026418, ENSMUSG00000026961,<br/> ENSMUSG00000075402, ENSMUSG00000028307</p> |
| GO:<br>0015<br>630 | microtubule cytoskeleton | 0.00245386<br>4 | 51 | <p>ENSMUSG00000017716, ENSMUSG00000079553,<br/> ENSMUSG00000015880, ENSMUSG00000050107,<br/> ENSMUSG00000027699, ENSMUSG00000024989,<br/> ENSMUSG00000026605, ENSMUSG00000030677,<br/> ENSMUSG00000068744, ENSMUSG00000019942,<br/> ENSMUSG00000045328, ENSMUSG00000006398,<br/> ENSMUSG00000028873, ENSMUSG000000041498,<br/> ENSMUSG00000017146, ENSMUSG00000002055,<br/> ENSMUSG00000019845, ENSMUSG00000037725,</p> | 1 | 19 | <p>ENSMUSG00000062380, ENSMUSG00000001134,<br/> ENSMUSG00000014846, ENSMUSG00000056267,<br/> ENSMUSG00000032010, ENSMUSG00000047746,<br/> ENSMUSG00000025597, ENSMUSG00000021573,<br/> ENSMUSG00000031812, ENSMUSG00000000266,<br/> ENSMUSG00000034467, ENSMUSG00000025812,<br/> ENSMUSG00000074673, ENSMUSG00000031176,<br/> ENSMUSG00000075307, ENSMUSG00000032060,<br/> ENSMUSG00000079480, ENSMUSG00000008035,</p>                                                                                                                                                                                                                                                                                                                                                                     |

|                               |                   |                 |           |                                                                                                                                                                                                                                                                                                                                                                                                                                                                                                                                                                                                                                                                                                                                                                          |          |          |                                                                                                                                                                                                               |
|-------------------------------|-------------------|-----------------|-----------|--------------------------------------------------------------------------------------------------------------------------------------------------------------------------------------------------------------------------------------------------------------------------------------------------------------------------------------------------------------------------------------------------------------------------------------------------------------------------------------------------------------------------------------------------------------------------------------------------------------------------------------------------------------------------------------------------------------------------------------------------------------------------|----------|----------|---------------------------------------------------------------------------------------------------------------------------------------------------------------------------------------------------------------|
|                               |                   |                 |           | <p>ENSMUSG00000027469, ENSMUSG00000022534,<br/> ENSMUSG00000027331, ENSMUSG00000029414,<br/> ENSMUSG00000048327, ENSMUSG00000028718,<br/> ENSMUSG00000041431, ENSMUSG00000036223,<br/> ENSMUSG00000027306, ENSMUSG00000037313,<br/> ENSMUSG00000023015, ENSMUSG00000024795,<br/> ENSMUSG00000026981, ENSMUSG00000037474,<br/> ENSMUSG00000069910, ENSMUSG00000051378,<br/> ENSMUSG0000002068, ENSMUSG00000020897,<br/> ENSMUSG00000038943, ENSMUSG00000017499,<br/> ENSMUSG00000037544, ENSMUSG00000028678,<br/> ENSMUSG00000012443, ENSMUSG00000030867,<br/> ENSMUSG00000022385, ENSMUSG00000023940,<br/> ENSMUSG00000072082, ENSMUSG00000036768,<br/> ENSMUSG00000026779, ENSMUSG00000033952,<br/> ENSMUSG00000058290, ENSMUSG00000032218,<br/> ENSMUSG00000027496</p> |          |          | <p>ENSMUSG00000028307</p>                                                                                                                                                                                     |
| <p>GO:<br/> 0005<br/> 694</p> | <p>chromosome</p> | <p>4.27E-06</p> | <p>50</p> | <p>ENSMUSG00000075266, ENSMUSG00000017716,<br/> ENSMUSG00000069302, ENSMUSG00000015880,<br/> ENSMUSG00000022034, ENSMUSG00000024791,<br/> ENSMUSG00000050107, ENSMUSG00000045273,<br/> ENSMUSG00000026605, ENSMUSG00000075031,<br/> ENSMUSG00000026646, ENSMUSG00000030677,<br/> ENSMUSG00000005410, ENSMUSG00000045328,<br/> ENSMUSG00000031004, ENSMUSG00000028873,<br/> ENSMUSG00000058773, ENSMUSG00000021714,</p>                                                                                                                                                                                                                                                                                                                                                   | <p>1</p> | <p>9</p> | <p>ENSMUSG00000031134, ENSMUSG00000009471,<br/> ENSMUSG00000020889, ENSMUSG00000031245,<br/> ENSMUSG00000062270, ENSMUSG00000046532,<br/> ENSMUSG00000031176, ENSMUSG00000032216,<br/> ENSMUSG00000025862</p> |

|                    |                   |   |   |                                                                                                                                                                                                                                                                                                                                                                                                                                                                                                                                                                                                                                                                                                                                                  |          |    |                                                                                                                                                                                                                                                                                                                                                                                                                                                                     |
|--------------------|-------------------|---|---|--------------------------------------------------------------------------------------------------------------------------------------------------------------------------------------------------------------------------------------------------------------------------------------------------------------------------------------------------------------------------------------------------------------------------------------------------------------------------------------------------------------------------------------------------------------------------------------------------------------------------------------------------------------------------------------------------------------------------------------------------|----------|----|---------------------------------------------------------------------------------------------------------------------------------------------------------------------------------------------------------------------------------------------------------------------------------------------------------------------------------------------------------------------------------------------------------------------------------------------------------------------|
|                    |                   |   |   | <p>ENSMUSG00000017146, ENSMUSG00000002055,<br/> ENSMUSG00000068101, ENSMUSG00000027379,<br/> ENSMUSG00000024056, ENSMUSG00000035365,<br/> ENSMUSG00000027331, ENSMUSG00000042489,<br/> ENSMUSG00000029414, ENSMUSG00000026683,<br/> ENSMUSG00000069273, ENSMUSG00000001228,<br/> ENSMUSG00000026039, ENSMUSG00000070691,<br/> ENSMUSG00000041431, ENSMUSG00000040084,<br/> ENSMUSG00000036223, ENSMUSG00000027306,<br/> ENSMUSG00000002307, ENSMUSG00000069910,<br/> ENSMUSG00000025001, ENSMUSG00000031756,<br/> ENSMUSG00000020897, ENSMUSG00000005470,<br/> ENSMUSG00000071350, ENSMUSG00000028678,<br/> ENSMUSG00000030867, ENSMUSG00000074476,<br/> ENSMUSG00000017861, ENSMUSG00000063021,<br/> ENSMUSG00000023940, ENSMUSG00000041064</p> |          |    |                                                                                                                                                                                                                                                                                                                                                                                                                                                                     |
| GO:<br>0043<br>292 | contractile fiber | 1 | 0 |                                                                                                                                                                                                                                                                                                                                                                                                                                                                                                                                                                                                                                                                                                                                                  | 7.97E-22 | 42 | <p>ENSMUSG00000009471, ENSMUSG00000030730,<br/> ENSMUSG00000032366, ENSMUSG00000033196,<br/> ENSMUSG00000057003, ENSMUSG00000031312,<br/> ENSMUSG00000007122, ENSMUSG00000047419,<br/> ENSMUSG00000039952, ENSMUSG00000021909,<br/> ENSMUSG00000006457, ENSMUSG00000025172,<br/> ENSMUSG00000031972, ENSMUSG00000017300,<br/> ENSMUSG00000061816, ENSMUSG00000056328,<br/> ENSMUSG00000041361, ENSMUSG00000061086,<br/> ENSMUSG00000067653, ENSMUSG00000032839,</p> |

|                    |                               |          |    |                                                                                                                                                                                                                                       |          |    |                                                                                                                                                                                                                                                                                                                                                                                                                                                                            |
|--------------------|-------------------------------|----------|----|---------------------------------------------------------------------------------------------------------------------------------------------------------------------------------------------------------------------------------------|----------|----|----------------------------------------------------------------------------------------------------------------------------------------------------------------------------------------------------------------------------------------------------------------------------------------------------------------------------------------------------------------------------------------------------------------------------------------------------------------------------|
|                    |                               |          |    |                                                                                                                                                                                                                                       |          |    | ENSMUSG00000006574, ENSMUSG000000032060, ENSMUSG00000007877, ENSMUSG000000060180, ENSMUSG000000020469, ENSMUSG000000040752, ENSMUSG000000064179, ENSMUSG000000035458, ENSMUSG000000027077, ENSMUSG000000091898, ENSMUSG000000053093, ENSMUSG000000061723, ENSMUSG000000028116, ENSMUSG000000031097, ENSMUSG000000092137, ENSMUSG000000045103, ENSMUSG000000041476, ENSMUSG000000059741, ENSMUSG000000030554, ENSMUSG000000026418, ENSMUSG000000049173, ENSMUSG000000052374 |
| GO:<br>0044<br>215 | other organism                | 1.79E-11 | 11 | ENSMUSG000000028269, ENSMUSG000000069874, ENSMUSG000000079362, ENSMUSG000000028268, ENSMUSG000000040253, ENSMUSG000000024339, ENSMUSG000000028270, ENSMUSG000000029298, ENSMUSG000000054072, ENSMUSG000000037321, ENSMUSG000000034459 | 1        | 0  |                                                                                                                                                                                                                                                                                                                                                                                                                                                                            |
| GO:<br>0005<br>865 | striated muscle thin filament | 1        | 0  |                                                                                                                                                                                                                                       | 2.36E-11 | 12 | ENSMUSG000000061723, ENSMUSG000000031097, ENSMUSG000000064179, ENSMUSG000000035458, ENSMUSG000000032366, ENSMUSG000000091898, ENSMUSG000000026418, ENSMUSG000000052374, ENSMUSG00000006457, ENSMUSG000000021909, ENSMUSG000000031972, ENSMUSG000000017300                                                                                                                                                                                                                  |
| GO:<br>0043<br>245 | extraorganismal space         | 1.79E-11 | 11 | ENSMUSG000000028269, ENSMUSG000000069874, ENSMUSG000000079362, ENSMUSG000000028268, ENSMUSG000000040253, ENSMUSG000000024339,                                                                                                         | 1        | 0  |                                                                                                                                                                                                                                                                                                                                                                                                                                                                            |

|                    |                                             |          |    |                                                                                                                                                                                                                                           |          |    |                                                                                                                                                                                                                     |
|--------------------|---------------------------------------------|----------|----|-------------------------------------------------------------------------------------------------------------------------------------------------------------------------------------------------------------------------------------------|----------|----|---------------------------------------------------------------------------------------------------------------------------------------------------------------------------------------------------------------------|
|                    |                                             |          |    | ENSMUSG00000028270, ENSMUSG00000029298,<br>ENSMUSG00000054072, ENSMUSG00000037321,<br>ENSMUSG00000034459                                                                                                                                  |          |    |                                                                                                                                                                                                                     |
| GO:<br>0065<br>010 | extracellular membrane-bounded<br>organelle | 3.24E-05 | 8  | ENSMUSG00000040253, ENSMUSG00000028270,<br>ENSMUSG00000028269, ENSMUSG00000069874,<br>ENSMUSG00000029298, ENSMUSG00000079362,<br>ENSMUSG00000054072, ENSMUSG00000028268                                                                   | 1        | 3  | ENSMUSG00000031134, ENSMUSG00000027376,<br>ENSMUSG00000018566                                                                                                                                                       |
| GO:<br>0032<br>982 | myosin filament                             | 1        | 0  |                                                                                                                                                                                                                                           | 1.82E-05 | 8  | ENSMUSG00000056328, ENSMUSG00000055775,<br>ENSMUSG00000033196, ENSMUSG00000057003,<br>ENSMUSG00000053093, ENSMUSG00000060180,<br>ENSMUSG00000042451, ENSMUSG00000040752                                             |
| GO:<br>0044<br>217 | other organism part                         | 1.79E-11 | 11 | ENSMUSG00000028269, ENSMUSG00000069874,<br>ENSMUSG00000079362, ENSMUSG00000028268,<br>ENSMUSG00000040253, ENSMUSG00000024339,<br>ENSMUSG00000028270, ENSMUSG00000029298,<br>ENSMUSG00000054072, ENSMUSG00000037321,<br>ENSMUSG00000034459 | 1        | 0  |                                                                                                                                                                                                                     |
| GO:<br>0033<br>643 | host cell part                              | 4.37E-08 | 8  | ENSMUSG00000040253, ENSMUSG00000028270,<br>ENSMUSG00000028269, ENSMUSG00000069874,<br>ENSMUSG00000029298, ENSMUSG00000079362,<br>ENSMUSG00000054072, ENSMUSG00000028268                                                                   | 1        | 0  |                                                                                                                                                                                                                     |
| GO:<br>0031<br>225 | anchored to membrane                        | 3.08E-07 | 23 | ENSMUSG00000013643, ENSMUSG00000030954,<br>ENSMUSG00000038209, ENSMUSG0000003617,<br>ENSMUSG00000024124, ENSMUSG00000051439,<br>ENSMUSG00000043811, ENSMUSG00000050896,<br>ENSMUSG00000075602, ENSMUSG00000031898,                        | 1        | 11 | ENSMUSG00000044287, ENSMUSG00000055653,<br>ENSMUSG00000039114, ENSMUSG00000019278,<br>ENSMUSG00000023328, ENSMUSG00000020183,<br>ENSMUSG00000057454, ENSMUSG00000031841,<br>ENSMUSG00000022595, ENSMUSG00000073413, |

|                    |                    |                 |    |                                                                                                                                                                                                                                                                                                                                                                                                                                                                                               |          |    |                                                                                                                                                                 |
|--------------------|--------------------|-----------------|----|-----------------------------------------------------------------------------------------------------------------------------------------------------------------------------------------------------------------------------------------------------------------------------------------------------------------------------------------------------------------------------------------------------------------------------------------------------------------------------------------------|----------|----|-----------------------------------------------------------------------------------------------------------------------------------------------------------------|
|                    |                    |                 |    | ENSMUSG00000023903, ENSMUSG00000037440, ENSMUSG00000078452, ENSMUSG00000022586, ENSMUSG00000052212, ENSMUSG00000022582, ENSMUSG00000022587, ENSMUSG00000046718, ENSMUSG00000038304, ENSMUSG00000020010, ENSMUSG00000030651, ENSMUSG00000022583, ENSMUSG00000022584                                                                                                                                                                                                                            |          |    | ENSMUSG00000010047                                                                                                                                              |
| GO:<br>0045<br>335 | phagocytic vesicle | 0.00273988<br>1 | 6  | ENSMUSG00000047517, ENSMUSG00000045322, ENSMUSG00000044827, ENSMUSG00000044583, ENSMUSG00000026177, ENSMUSG00000025473                                                                                                                                                                                                                                                                                                                                                                        | 1        | 0  |                                                                                                                                                                 |
| GO:<br>0005<br>819 | spindle            | 1.02E-07        | 24 | ENSMUSG00000017716, ENSMUSG00000050107, ENSMUSG00000027699, ENSMUSG00000041431, ENSMUSG00000036223, ENSMUSG00000026605, ENSMUSG00000027306, ENSMUSG00000023015, ENSMUSG00000069910, ENSMUSG00000030677, ENSMUSG00000068744, ENSMUSG00000019942, ENSMUSG00000020897, ENSMUSG00000038943, ENSMUSG00000017499, ENSMUSG00000037544, ENSMUSG00000030867, ENSMUSG00000012443, ENSMUSG0000002055, ENSMUSG00000027469, ENSMUSG00000023940, ENSMUSG00000033952, ENSMUSG00000029414, ENSMUSG00000027496 | 1        | 2  | ENSMUSG00000079480, ENSMUSG00000025812                                                                                                                          |
| GO:<br>0015<br>629 | actin cytoskeleton | 1               | 6  | ENSMUSG00000024397, ENSMUSG00000015880, ENSMUSG00000024696, ENSMUSG00000028874, ENSMUSG00000032322, ENSMUSG00000025473                                                                                                                                                                                                                                                                                                                                                                        | 3.01E-10 | 44 | ENSMUSG00000068270, ENSMUSG00000032366, ENSMUSG00000025889, ENSMUSG00000055775, ENSMUSG00000033196, ENSMUSG00000057003, ENSMUSG00000030672, ENSMUSG00000033577, |



|                    |                   |   |    |                                                                                                                                                                                                                                                                                                                                                                           |          |                                                                                                                                                                                                                                                                                                                                                                                                                                                                                                                                                                                                                                                                                                                                                                                                                                            |                                                                                                                                                                                                                                                                                                                                                                           |
|--------------------|-------------------|---|----|---------------------------------------------------------------------------------------------------------------------------------------------------------------------------------------------------------------------------------------------------------------------------------------------------------------------------------------------------------------------------|----------|--------------------------------------------------------------------------------------------------------------------------------------------------------------------------------------------------------------------------------------------------------------------------------------------------------------------------------------------------------------------------------------------------------------------------------------------------------------------------------------------------------------------------------------------------------------------------------------------------------------------------------------------------------------------------------------------------------------------------------------------------------------------------------------------------------------------------------------------|---------------------------------------------------------------------------------------------------------------------------------------------------------------------------------------------------------------------------------------------------------------------------------------------------------------------------------------------------------------------------|
|                    |                   |   |    |                                                                                                                                                                                                                                                                                                                                                                           |          | <p>ENSMUSG00000021909, ENSMUSG00000006457,<br/> ENSMUSG00000041688, ENSMUSG00000052698,<br/> ENSMUSG00000031972, ENSMUSG00000032232,<br/> ENSMUSG00000017300, ENSMUSG00000061816,<br/> ENSMUSG00000042451, ENSMUSG00000056328,<br/> ENSMUSG00000041361, ENSMUSG00000067653,<br/> ENSMUSG00000032060, ENSMUSG00000060180,<br/> ENSMUSG00000030244, ENSMUSG00000020469,<br/> ENSMUSG00000026532, ENSMUSG00000040752,<br/> ENSMUSG00000064179, ENSMUSG00000035458,<br/> ENSMUSG00000031214, ENSMUSG00000089996,<br/> ENSMUSG00000091898, ENSMUSG00000053093,<br/> ENSMUSG00000033590, ENSMUSG00000068697,<br/> ENSMUSG00000061723, ENSMUSG00000028116,<br/> ENSMUSG00000031097, ENSMUSG00000039585,<br/> ENSMUSG00000092137, ENSMUSG00000059741,<br/> ENSMUSG00000031355, ENSMUSG00000041729,<br/> ENSMUSG00000026418, ENSMUSG00000052374</p> |                                                                                                                                                                                                                                                                                                                                                                           |
| GO:<br>0005<br>624 | membrane fraction | 1 | 17 | <p>ENSMUSG00000031898, ENSMUSG00000030148,<br/> ENSMUSG00000003665, ENSMUSG00000039519,<br/> ENSMUSG00000031444, ENSMUSG00000030525,<br/> ENSMUSG00000041431, ENSMUSG00000026580,<br/> ENSMUSG00000024339, ENSMUSG00000003555,<br/> ENSMUSG00000026475, ENSMUSG00000031891,<br/> ENSMUSG00000041347, ENSMUSG00000023045,<br/> ENSMUSG00000037321, ENSMUSG00000041831,</p> | 3.74E-05 | 66                                                                                                                                                                                                                                                                                                                                                                                                                                                                                                                                                                                                                                                                                                                                                                                                                                         | <p>ENSMUSG00000030302, ENSMUSG00000032547,<br/> ENSMUSG00000074254, ENSMUSG00000025889,<br/> ENSMUSG00000070570, ENSMUSG00000007122,<br/> ENSMUSG00000040867, ENSMUSG00000027849,<br/> ENSMUSG00000020524, ENSMUSG00000002588,<br/> ENSMUSG00000013418, ENSMUSG00000032310,<br/> ENSMUSG00000028356, ENSMUSG00000010051,<br/> ENSMUSG00000037071, ENSMUSG00000038776,</p> |

|     |                  |   |   |                    |          |    |                                                                                                                                                                                                                                                                                                                                                                                                                                                                                                                                                                                                                                                                                                                                                                                                                                                                                                                                                                                                                                                                                                                |
|-----|------------------|---|---|--------------------|----------|----|----------------------------------------------------------------------------------------------------------------------------------------------------------------------------------------------------------------------------------------------------------------------------------------------------------------------------------------------------------------------------------------------------------------------------------------------------------------------------------------------------------------------------------------------------------------------------------------------------------------------------------------------------------------------------------------------------------------------------------------------------------------------------------------------------------------------------------------------------------------------------------------------------------------------------------------------------------------------------------------------------------------------------------------------------------------------------------------------------------------|
|     |                  |   |   | ENSMUSG00000032218 |          |    | ENSMUSG00000032076, ENSMUSG00000078597,<br>ENSMUSG00000004892, ENSMUSG00000066072,<br>ENSMUSG00000052974, ENSMUSG00000032086,<br>ENSMUSG00000040181, ENSMUSG00000059412,<br>ENSMUSG00000032315, ENSMUSG00000047182,<br>ENSMUSG00000027820, ENSMUSG00000044338,<br>ENSMUSG00000032491, ENSMUSG00000023013,<br>ENSMUSG00000015405, ENSMUSG00000030554,<br>ENSMUSG00000059481, ENSMUSG00000050195,<br>ENSMUSG00000030730, ENSMUSG0000003053,<br>ENSMUSG00000024500, ENSMUSG00000055980,<br>ENSMUSG00000052911, ENSMUSG00000057182,<br>ENSMUSG00000031844, ENSMUSG00000006269,<br>ENSMUSG00000033577, ENSMUSG00000001986,<br>ENSMUSG00000018566, ENSMUSG00000033595,<br>ENSMUSG00000036813, ENSMUSG00000031489,<br>ENSMUSG00000026691, ENSMUSG00000048142,<br>ENSMUSG00000032216, ENSMUSG00000066071,<br>ENSMUSG00000029361, ENSMUSG00000073424,<br>ENSMUSG00000057880, ENSMUSG00000019326,<br>ENSMUSG00000032570, ENSMUSG00000007815,<br>ENSMUSG00000019478, ENSMUSG000000031144,<br>ENSMUSG00000045103, ENSMUSG00000030747,<br>ENSMUSG00000048758, ENSMUSG00000022206,<br>ENSMUSG00000028307, ENSMUSG00000012187 |
| GO: | keratin filament | 1 | 0 |                    | 8.51E-05 | 10 | ENSMUSG00000064201, ENSMUSG00000059668,                                                                                                                                                                                                                                                                                                                                                                                                                                                                                                                                                                                                                                                                                                                                                                                                                                                                                                                                                                                                                                                                        |

|                    |                      |                 |     |                                                                                                                                                                                                                                                                                                                                                                                                                                                                                                                                                                                                                                                                                                                                                         |             |    |                                                                                                                                                                                                                                                                                                                                                                                                                                                                                                                                                                                                                                                                                                                                                         |
|--------------------|----------------------|-----------------|-----|---------------------------------------------------------------------------------------------------------------------------------------------------------------------------------------------------------------------------------------------------------------------------------------------------------------------------------------------------------------------------------------------------------------------------------------------------------------------------------------------------------------------------------------------------------------------------------------------------------------------------------------------------------------------------------------------------------------------------------------------------------|-------------|----|---------------------------------------------------------------------------------------------------------------------------------------------------------------------------------------------------------------------------------------------------------------------------------------------------------------------------------------------------------------------------------------------------------------------------------------------------------------------------------------------------------------------------------------------------------------------------------------------------------------------------------------------------------------------------------------------------------------------------------------------------------|
| 0045<br>095        |                      |                 |     |                                                                                                                                                                                                                                                                                                                                                                                                                                                                                                                                                                                                                                                                                                                                                         |             |    | ENSMUSG0000005355, ENSMUSG00000046834,<br>ENSMUSG00000075402, ENSMUSG00000067594,<br>ENSMUSG00000044041, ENSMUSG00000061397,<br>ENSMUSG00000061527, ENSMUSG00000063661                                                                                                                                                                                                                                                                                                                                                                                                                                                                                                                                                                                  |
| GO:<br>0005<br>876 | spindle microtubule  | 0.00186310<br>6 | 9   | ENSMUSG00000019942, ENSMUSG00000017716,<br>ENSMUSG00000002055, ENSMUSG00000030867,<br>ENSMUSG00000036223, ENSMUSG00000027469,<br>ENSMUSG00000027306, ENSMUSG00000027496,<br>ENSMUSG00000029414                                                                                                                                                                                                                                                                                                                                                                                                                                                                                                                                                          | 1           | 0  |                                                                                                                                                                                                                                                                                                                                                                                                                                                                                                                                                                                                                                                                                                                                                         |
| GO:<br>0044<br>459 | plasma membrane part | 2.27E-07        | 108 | ENSMUSG00000039364, ENSMUSG00000017716,<br>ENSMUSG00000060802, ENSMUSG00000001773,<br>ENSMUSG00000058755, ENSMUSG00000024112,<br>ENSMUSG00000027995, ENSMUSG00000048534,<br>ENSMUSG00000027699, ENSMUSG00000003617,<br>ENSMUSG00000047197, ENSMUSG00000049103,<br>ENSMUSG00000061232, ENSMUSG00000028613,<br>ENSMUSG00000053977, ENSMUSG00000060550,<br>ENSMUSG00000050232, ENSMUSG00000028072,<br>ENSMUSG00000000817, ENSMUSG00000078452,<br>ENSMUSG00000030786, ENSMUSG00000025804,<br>ENSMUSG00000046718, ENSMUSG00000051498,<br>ENSMUSG00000020651, ENSMUSG00000029816,<br>ENSMUSG00000030156, ENSMUSG00000034855,<br>ENSMUSG00000028262, ENSMUSG00000026770,<br>ENSMUSG00000030651, ENSMUSG00000053395,<br>ENSMUSG00000025473, ENSMUSG00000045322, | 0.222225278 | 88 | ENSMUSG00000030302, ENSMUSG00000034783,<br>ENSMUSG00000007122, ENSMUSG00000032511,<br>ENSMUSG00000090877, ENSMUSG00000026824,<br>ENSMUSG00000020524, ENSMUSG00000039952,<br>ENSMUSG00000090639, ENSMUSG00000071317,<br>ENSMUSG00000067951, ENSMUSG00000026874,<br>ENSMUSG00000027401, ENSMUSG00000032839,<br>ENSMUSG00000017697, ENSMUSG00000032076,<br>ENSMUSG00000040055, ENSMUSG00000024027,<br>ENSMUSG00000013076, ENSMUSG00000066072,<br>ENSMUSG00000056632, ENSMUSG00000032086,<br>ENSMUSG00000030278, ENSMUSG00000032034,<br>ENSMUSG00000059412, ENSMUSG00000028427,<br>ENSMUSG00000038201, ENSMUSG00000059327,<br>ENSMUSG00000032491, ENSMUSG00000022040,<br>ENSMUSG00000023013, ENSMUSG00000092137,<br>ENSMUSG00000029205, ENSMUSG00000050520, |

|  |  |  |                                                                                                                                                                                                                                                                                                                                                                                                                                                                                                                                                                                                                                                                                                                                                                                                                                                                                                                                                                                                                                                                                                                                                           |  |  |                                                                                                                                                                                                                                                                                                                                                                                                                                                                                                                                                                                                                                                                                                                                                                                                                                                                                                                                                                                                                                                                                                                                                             |
|--|--|--|-----------------------------------------------------------------------------------------------------------------------------------------------------------------------------------------------------------------------------------------------------------------------------------------------------------------------------------------------------------------------------------------------------------------------------------------------------------------------------------------------------------------------------------------------------------------------------------------------------------------------------------------------------------------------------------------------------------------------------------------------------------------------------------------------------------------------------------------------------------------------------------------------------------------------------------------------------------------------------------------------------------------------------------------------------------------------------------------------------------------------------------------------------------|--|--|-------------------------------------------------------------------------------------------------------------------------------------------------------------------------------------------------------------------------------------------------------------------------------------------------------------------------------------------------------------------------------------------------------------------------------------------------------------------------------------------------------------------------------------------------------------------------------------------------------------------------------------------------------------------------------------------------------------------------------------------------------------------------------------------------------------------------------------------------------------------------------------------------------------------------------------------------------------------------------------------------------------------------------------------------------------------------------------------------------------------------------------------------------------|
|  |  |  | ENSMUSG00000030954, ENSMUSG00000027219,<br>ENSMUSG00000030149, ENSMUSG00000030525,<br>ENSMUSG00000025739, ENSMUSG00000026656,<br>ENSMUSG00000050241, ENSMUSG00000029075,<br>ENSMUSG00000028459, ENSMUSG00000030124,<br>ENSMUSG00000026582, ENSMUSG00000003283,<br>ENSMUSG00000022094, ENSMUSG00000056025,<br>ENSMUSG00000079620, ENSMUSG00000028068,<br>ENSMUSG00000024397, ENSMUSG00000022582,<br>ENSMUSG00000047330, ENSMUSG00000071715,<br>ENSMUSG00000026009, ENSMUSG00000053219,<br>ENSMUSG00000021451, ENSMUSG00000038963,<br>ENSMUSG00000040528, ENSMUSG00000071005,<br>ENSMUSG00000029417, ENSMUSG00000038209,<br>ENSMUSG00000029811, ENSMUSG00000024696,<br>ENSMUSG00000079451, ENSMUSG00000030677,<br>ENSMUSG00000075602, ENSMUSG00000073411,<br>ENSMUSG0000001901, ENSMUSG00000075122,<br>ENSMUSG00000004952, ENSMUSG00000047230,<br>ENSMUSG00000028874, ENSMUSG00000030365,<br>ENSMUSG00000028217, ENSMUSG00000026011,<br>ENSMUSG00000030167, ENSMUSG00000026285,<br>ENSMUSG00000019320, ENSMUSG00000059089,<br>ENSMUSG00000079227, ENSMUSG00000049608,<br>ENSMUSG00000067212, ENSMUSG00000016496,<br>ENSMUSG00000055170, ENSMUSG00000028965, |  |  | ENSMUSG00000032548, ENSMUSG00000059481,<br>ENSMUSG00000031997, ENSMUSG00000052374,<br>ENSMUSG00000019894, ENSMUSG00000032531,<br>ENSMUSG00000040412, ENSMUSG00000068270,<br>ENSMUSG00000033831, ENSMUSG00000038064,<br>ENSMUSG00000032366, ENSMUSG00000055980,<br>ENSMUSG00000046480, ENSMUSG00000001943,<br>ENSMUSG00000057182, ENSMUSG00000031841,<br>ENSMUSG00000006269, ENSMUSG00000033577,<br>ENSMUSG00000032554, ENSMUSG00000006457,<br>ENSMUSG00000001986, ENSMUSG00000041688,<br>ENSMUSG000000061259, ENSMUSG00000052698,<br>ENSMUSG00000018566, ENSMUSG00000032232,<br>ENSMUSG00000047797, ENSMUSG00000041361,<br>ENSMUSG00000006574, ENSMUSG00000041523,<br>ENSMUSG00000038119, ENSMUSG00000073424,<br>ENSMUSG00000040752, ENSMUSG00000051726,<br>ENSMUSG00000055653, ENSMUSG00000010064,<br>ENSMUSG00000001946, ENSMUSG00000007815,<br>ENSMUSG00000053093, ENSMUSG00000035459,<br>ENSMUSG00000021573, ENSMUSG00000043165,<br>ENSMUSG00000029669, ENSMUSG00000044359,<br>ENSMUSG00000025812, ENSMUSG00000045103,<br>ENSMUSG00000069441, ENSMUSG00000041476,<br>ENSMUSG00000031377, ENSMUSG00000026961,<br>ENSMUSG00000037624, ENSMUSG00000040808, |
|--|--|--|-----------------------------------------------------------------------------------------------------------------------------------------------------------------------------------------------------------------------------------------------------------------------------------------------------------------------------------------------------------------------------------------------------------------------------------------------------------------------------------------------------------------------------------------------------------------------------------------------------------------------------------------------------------------------------------------------------------------------------------------------------------------------------------------------------------------------------------------------------------------------------------------------------------------------------------------------------------------------------------------------------------------------------------------------------------------------------------------------------------------------------------------------------------|--|--|-------------------------------------------------------------------------------------------------------------------------------------------------------------------------------------------------------------------------------------------------------------------------------------------------------------------------------------------------------------------------------------------------------------------------------------------------------------------------------------------------------------------------------------------------------------------------------------------------------------------------------------------------------------------------------------------------------------------------------------------------------------------------------------------------------------------------------------------------------------------------------------------------------------------------------------------------------------------------------------------------------------------------------------------------------------------------------------------------------------------------------------------------------------|

|                    |                                         |          |    |                                                                                                                                                                                                                                                                                                                                                                                                                                                                                      |   |   |                                        |
|--------------------|-----------------------------------------|----------|----|--------------------------------------------------------------------------------------------------------------------------------------------------------------------------------------------------------------------------------------------------------------------------------------------------------------------------------------------------------------------------------------------------------------------------------------------------------------------------------------|---|---|----------------------------------------|
|                    |                                         |          |    | ENSMUSG00000057135, ENSMUSG00000068227,<br>ENSMUSG00000067341, ENSMUSG00000027843,<br>ENSMUSG00000062082, ENSMUSG00000058715,<br>ENSMUSG00000035929, ENSMUSG00000000791,<br>ENSMUSG00000050896, ENSMUSG00000015947,<br>ENSMUSG00000022901, ENSMUSG00000044827,<br>ENSMUSG00000056290, ENSMUSG00000079298,<br>ENSMUSG00000024401, ENSMUSG00000073409,<br>ENSMUSG00000012428, ENSMUSG00000026580,<br>ENSMUSG00000067610, ENSMUSG00000025746,<br>ENSMUSG00000038304, ENSMUSG00000026271 |   |   | ENSMUSG00000010047, ENSMUSG00000061974 |
| GO:<br>0020<br>005 | symbiont-containing vacuole<br>membrane | 2.76E-08 | 7  | ENSMUSG00000040253, ENSMUSG00000028270,<br>ENSMUSG00000028269, ENSMUSG00000029298,<br>ENSMUSG00000079362, ENSMUSG00000054072,<br>ENSMUSG00000028268                                                                                                                                                                                                                                                                                                                                  | 1 | 0 |                                        |
| GO:<br>0000<br>775 | chromosome, centromeric region          | 8.42E-11 | 28 | ENSMUSG00000075266, ENSMUSG00000017716,<br>ENSMUSG00000026683, ENSMUSG00000045273,<br>ENSMUSG00000026039, ENSMUSG00000041431,<br>ENSMUSG00000040084, ENSMUSG00000036223,<br>ENSMUSG00000026605, ENSMUSG00000069910,<br>ENSMUSG00000025001, ENSMUSG00000026646,<br>ENSMUSG00000045328, ENSMUSG00000031756,<br>ENSMUSG00000020897, ENSMUSG00000028873,<br>ENSMUSG00000031004, ENSMUSG00000021714,<br>ENSMUSG00000028678, ENSMUSG00000030867,<br>ENSMUSG0000002055, ENSMUSG00000074476, | 1 | 2 | ENSMUSG00000025862, ENSMUSG00000031176 |

|                    |                                    |   |    |                                                                                                                                                                                                                     |             |    |                                                                                                                                                                                                                                                                                                                                                                                                                                                                                                                                                                                                                                                                                                                                                                                                   |
|--------------------|------------------------------------|---|----|---------------------------------------------------------------------------------------------------------------------------------------------------------------------------------------------------------------------|-------------|----|---------------------------------------------------------------------------------------------------------------------------------------------------------------------------------------------------------------------------------------------------------------------------------------------------------------------------------------------------------------------------------------------------------------------------------------------------------------------------------------------------------------------------------------------------------------------------------------------------------------------------------------------------------------------------------------------------------------------------------------------------------------------------------------------------|
|                    |                                    |   |    | ENSMUSG00000068101, ENSMUSG00000027379,<br>ENSMUSG00000024056, ENSMUSG00000023940,<br>ENSMUSG00000027331, ENSMUSG00000029414                                                                                        |             |    |                                                                                                                                                                                                                                                                                                                                                                                                                                                                                                                                                                                                                                                                                                                                                                                                   |
| GO:<br>0030<br>017 | sarcomere                          | 1 | 0  |                                                                                                                                                                                                                     | 1.04E-20    | 36 | ENSMUSG00000030730, ENSMUSG00000032366,<br>ENSMUSG00000033196, ENSMUSG00000031312,<br>ENSMUSG00000007122, ENSMUSG00000021909,<br>ENSMUSG00000006457, ENSMUSG00000025172,<br>ENSMUSG00000031972, ENSMUSG00000017300,<br>ENSMUSG00000056328, ENSMUSG00000041361,<br>ENSMUSG00000061086, ENSMUSG00000067653,<br>ENSMUSG00000032839, ENSMUSG00000006574,<br>ENSMUSG00000032060, ENSMUSG00000007877,<br>ENSMUSG00000020469, ENSMUSG00000040752,<br>ENSMUSG00000064179, ENSMUSG00000035458,<br>ENSMUSG00000027077, ENSMUSG00000091898,<br>ENSMUSG00000053093, ENSMUSG00000061723,<br>ENSMUSG00000031097, ENSMUSG00000028116,<br>ENSMUSG00000092137, ENSMUSG00000045103,<br>ENSMUSG00000041476, ENSMUSG00000059741,<br>ENSMUSG00000030554, ENSMUSG00000049173,<br>ENSMUSG00000052374, ENSMUSG00000026418 |
| GO:<br>0005<br>578 | proteinaceous extracellular matrix | 1 | 20 | ENSMUSG00000025044, ENSMUSG00000036905,<br>ENSMUSG00000006403, ENSMUSG00000005800,<br>ENSMUSG00000035493, ENSMUSG00000036887,<br>ENSMUSG00000037974, ENSMUSG00000024330,<br>ENSMUSG00000050578, ENSMUSG00000047517, | 0.009279574 | 30 | ENSMUSG00000040533, ENSMUSG00000033327,<br>ENSMUSG00000044892, ENSMUSG00000055653,<br>ENSMUSG00000029368, ENSMUSG00000040488,<br>ENSMUSG00000025889, ENSMUSG00000039269,<br>ENSMUSG00000052911, ENSMUSG00000023328,                                                                                                                                                                                                                                                                                                                                                                                                                                                                                                                                                                               |

|                    |              |          |    |                                                                                                                                                                                                                                                                                                                                                                                                                                                                                                                                                                                                                                                                                                              |   |    |                                                                                                                                                                                                                                                                                                                                                                                                                                                                                                                                                       |
|--------------------|--------------|----------|----|--------------------------------------------------------------------------------------------------------------------------------------------------------------------------------------------------------------------------------------------------------------------------------------------------------------------------------------------------------------------------------------------------------------------------------------------------------------------------------------------------------------------------------------------------------------------------------------------------------------------------------------------------------------------------------------------------------------|---|----|-------------------------------------------------------------------------------------------------------------------------------------------------------------------------------------------------------------------------------------------------------------------------------------------------------------------------------------------------------------------------------------------------------------------------------------------------------------------------------------------------------------------------------------------------------|
|                    |              |          |    | ENSMUSG00000030077, ENSMUSG00000033453,<br>ENSMUSG00000033880, ENSMUSG00000018486,<br>ENSMUSG00000001131, ENSMUSG00000036896,<br>ENSMUSG00000024529, ENSMUSG00000021614,<br>ENSMUSG00000036596, ENSMUSG00000020053                                                                                                                                                                                                                                                                                                                                                                                                                                                                                           |   |    | ENSMUSG00000031274, ENSMUSG00000039952,<br>ENSMUSG00000090639, ENSMUSG00000032554,<br>ENSMUSG00000059327, ENSMUSG00000043719,<br>ENSMUSG00000032332, ENSMUSG00000030607,<br>ENSMUSG00000026668, ENSMUSG00000041559,<br>ENSMUSG00000022996, ENSMUSG00000030606,<br>ENSMUSG00000058914, ENSMUSG00000025784,<br>ENSMUSG00000057606, ENSMUSG00000055632,<br>ENSMUSG00000036655, ENSMUSG00000071347,<br>ENSMUSG00000022878, ENSMUSG00000091345                                                                                                             |
| GO:<br>0009<br>986 | cell surface | 2.70E-12 | 61 | ENSMUSG00000060802, ENSMUSG00000027995,<br>ENSMUSG00000038642, ENSMUSG00000071005,<br>ENSMUSG00000029417, ENSMUSG00000071068,<br>ENSMUSG00000047197, ENSMUSG00000061232,<br>ENSMUSG00000051439, ENSMUSG00000029378,<br>ENSMUSG00000073406, ENSMUSG00000053063,<br>ENSMUSG00000053977, ENSMUSG00000075602,<br>ENSMUSG00000073411, ENSMUSG00000050232,<br>ENSMUSG00000028072, ENSMUSG00000000817,<br>ENSMUSG00000075122, ENSMUSG00000078452,<br>ENSMUSG00000029915, ENSMUSG00000030786,<br>ENSMUSG00000030365, ENSMUSG00000026011,<br>ENSMUSG00000030167, ENSMUSG00000026285,<br>ENSMUSG00000025804, ENSMUSG00000059089,<br>ENSMUSG00000079227, ENSMUSG00000030156,<br>ENSMUSG00000034855, ENSMUSG00000026770, | 1 | 25 | ENSMUSG00000025810, ENSMUSG00000033831,<br>ENSMUSG00000019326, ENSMUSG00000023328,<br>ENSMUSG00000032511, ENSMUSG00000032034,<br>ENSMUSG00000031841, ENSMUSG00000026824,<br>ENSMUSG00000021319, ENSMUSG00000035459,<br>ENSMUSG00000061393, ENSMUSG00000041688,<br>ENSMUSG00000061259, ENSMUSG00000000049,<br>ENSMUSG0000006373, ENSMUSG00000018566,<br>ENSMUSG00000045103, ENSMUSG00000031494,<br>ENSMUSG00000017697, ENSMUSG00000015405,<br>ENSMUSG00000027442, ENSMUSG00000059481,<br>ENSMUSG00000032060, ENSMUSG00000038119,<br>ENSMUSG00000010047 |

|                    |                  |   |     |                                                                                                                                                                                                                                                                                                                                                                                                                                                                                                                                                                                                                                                                                 |             |     |                                                                                                                                                                                                                                                                                                                                                                                                                                                                                                                  |
|--------------------|------------------|---|-----|---------------------------------------------------------------------------------------------------------------------------------------------------------------------------------------------------------------------------------------------------------------------------------------------------------------------------------------------------------------------------------------------------------------------------------------------------------------------------------------------------------------------------------------------------------------------------------------------------------------------------------------------------------------------------------|-------------|-----|------------------------------------------------------------------------------------------------------------------------------------------------------------------------------------------------------------------------------------------------------------------------------------------------------------------------------------------------------------------------------------------------------------------------------------------------------------------------------------------------------------------|
|                    |                  |   |     | <p>ENSMUSG00000025473, ENSMUSG00000016496,<br/> ENSMUSG00000030154, ENSMUSG00000055170,<br/> ENSMUSG00000028965, ENSMUSG00000068227,<br/> ENSMUSG00000055994, ENSMUSG00000062082,<br/> ENSMUSG00000058715, ENSMUSG00000071552,<br/> ENSMUSG00000030149, ENSMUSG00000030525,<br/> ENSMUSG00000043811, ENSMUSG00000000791,<br/> ENSMUSG00000050896, ENSMUSG00000015947,<br/> ENSMUSG00000022901, ENSMUSG00000026656,<br/> ENSMUSG00000050241, ENSMUSG00000023903,<br/> ENSMUSG00000029075, ENSMUSG00000030124,<br/> ENSMUSG00000079298, ENSMUSG00000024401,<br/> ENSMUSG00000022582, ENSMUSG00000026580,<br/> ENSMUSG00000025746, ENSMUSG00000026009,<br/> ENSMUSG00000053219</p> |             |     |                                                                                                                                                                                                                                                                                                                                                                                                                                                                                                                  |
| GO:<br>0044<br>444 | cytoplasmic part | 1 | 146 | <p>ENSMUSG00000017716, ENSMUSG00000027995,<br/> ENSMUSG00000031098, ENSMUSG00000050107,<br/> ENSMUSG00000024857, ENSMUSG00000049103,<br/> ENSMUSG00000044165, ENSMUSG00000078853,<br/> ENSMUSG00000025877, ENSMUSG00000019942,<br/> ENSMUSG00000030268, ENSMUSG00000021190,<br/> ENSMUSG00000022831, ENSMUSG00000020848,<br/> ENSMUSG00000000817, ENSMUSG00000033644,<br/> ENSMUSG00000040264, ENSMUSG00000023045,<br/> ENSMUSG00000037321, ENSMUSG00000031551,<br/> ENSMUSG00000036912, ENSMUSG00000025473,</p>                                                                                                                                                                | 0.000431512 | 277 | <p>ENSMUSG00000042045, ENSMUSG00000030302,<br/> ENSMUSG00000032263, ENSMUSG00000025889,<br/> ENSMUSG00000079334, ENSMUSG00000054422,<br/> ENSMUSG00000023328, ENSMUSG00000007122,<br/> ENSMUSG00000027849, ENSMUSG00000032320,<br/> ENSMUSG00000090639, ENSMUSG00000032549,<br/> ENSMUSG00000021909, ENSMUSG00000057074,<br/> ENSMUSG00000013418, ENSMUSG00000025172,<br/> ENSMUSG00000032454, ENSMUSG00000033208,<br/> ENSMUSG00000033350, ENSMUSG00000073940,<br/> ENSMUSG00000032449, ENSMUSG00000061527,</p> |



|  |  |  |                                                                                                                                                                                                                                                                                                                                                                                                                                                                                                                                                                                                                                                                                                                                                                                                                                                                                                                                                                                                                                                                                                                                                            |  |  |                                                                                                                                                                                                                                                                                                                                                                                                                                                                                                                                                                                                                                                                                                                                                                                                                                                                                                                                                                                                                                                                                                                                                            |
|--|--|--|------------------------------------------------------------------------------------------------------------------------------------------------------------------------------------------------------------------------------------------------------------------------------------------------------------------------------------------------------------------------------------------------------------------------------------------------------------------------------------------------------------------------------------------------------------------------------------------------------------------------------------------------------------------------------------------------------------------------------------------------------------------------------------------------------------------------------------------------------------------------------------------------------------------------------------------------------------------------------------------------------------------------------------------------------------------------------------------------------------------------------------------------------------|--|--|------------------------------------------------------------------------------------------------------------------------------------------------------------------------------------------------------------------------------------------------------------------------------------------------------------------------------------------------------------------------------------------------------------------------------------------------------------------------------------------------------------------------------------------------------------------------------------------------------------------------------------------------------------------------------------------------------------------------------------------------------------------------------------------------------------------------------------------------------------------------------------------------------------------------------------------------------------------------------------------------------------------------------------------------------------------------------------------------------------------------------------------------------------|
|  |  |  | ENSMUSG00000038037, ENSMUSG00000069874,<br>ENSMUSG00000045322, ENSMUSG00000025492,<br>ENSMUSG00000055994, ENSMUSG00000024353,<br>ENSMUSG00000063268, ENSMUSG00000041431,<br>ENSMUSG00000037313, ENSMUSG00000000982,<br>ENSMUSG00000029304, ENSMUSG00000037474,<br>ENSMUSG00000002307, ENSMUSG00000030218,<br>ENSMUSG00000026582, ENSMUSG00000022094,<br>ENSMUSG00000037544, ENSMUSG00000028268,<br>ENSMUSG00000022876, ENSMUSG00000071715,<br>ENSMUSG00000042345, ENSMUSG00000028480,<br>ENSMUSG00000027496, ENSMUSG00000040483,<br>ENSMUSG00000074151, ENSMUSG00000026822,<br>ENSMUSG00000047517, ENSMUSG00000005667,<br>ENSMUSG00000037202, ENSMUSG00000027199,<br>ENSMUSG00000031504, ENSMUSG00000024842,<br>ENSMUSG00000062007, ENSMUSG00000030345,<br>ENSMUSG00000037725, ENSMUSG00000027398,<br>ENSMUSG00000048327, ENSMUSG00000044201,<br>ENSMUSG00000027843, ENSMUSG00000049303,<br>ENSMUSG00000070524, ENSMUSG00000003555,<br>ENSMUSG00000023015, ENSMUSG00000038301,<br>ENSMUSG00000078920, ENSMUSG00000039519,<br>ENSMUSG00000036986, ENSMUSG00000024401,<br>ENSMUSG00000050370, ENSMUSG00000026580,<br>ENSMUSG00000072082, ENSMUSG00000033213, |  |  | ENSMUSG00000074183, ENSMUSG00000044037,<br>ENSMUSG00000032649, ENSMUSG00000074218,<br>ENSMUSG00000057933, ENSMUSG00000037010,<br>ENSMUSG00000032076, ENSMUSG00000008035,<br>ENSMUSG00000034584, ENSMUSG00000040181,<br>ENSMUSG00000032527, ENSMUSG00000032315,<br>ENSMUSG00000047182, ENSMUSG00000027820,<br>ENSMUSG00000052217, ENSMUSG00000061723,<br>ENSMUSG00000032356, ENSMUSG00000050520,<br>ENSMUSG00000059741, ENSMUSG00000079480,<br>ENSMUSG00000029499, ENSMUSG00000003053,<br>ENSMUSG00000030730, ENSMUSG00000033196,<br>ENSMUSG00000031059, ENSMUSG00000035686,<br>ENSMUSG00000047419, ENSMUSG00000035847,<br>ENSMUSG00000032554, ENSMUSG00000006269,<br>ENSMUSG00000031320, ENSMUSG00000006457,<br>ENSMUSG00000041688, ENSMUSG00000025037,<br>ENSMUSG00000017300, ENSMUSG00000047797,<br>ENSMUSG00000005705, ENSMUSG00000006574,<br>ENSMUSG00000032060, ENSMUSG00000030244,<br>ENSMUSG00000029361, ENSMUSG00000055609,<br>ENSMUSG00000040752, ENSMUSG00000009927,<br>ENSMUSG00000032349, ENSMUSG00000041658,<br>ENSMUSG00000035458, ENSMUSG00000020096,<br>ENSMUSG00000032249, ENSMUSG00000021622,<br>ENSMUSG00000025815, ENSMUSG00000053093, |
|--|--|--|------------------------------------------------------------------------------------------------------------------------------------------------------------------------------------------------------------------------------------------------------------------------------------------------------------------------------------------------------------------------------------------------------------------------------------------------------------------------------------------------------------------------------------------------------------------------------------------------------------------------------------------------------------------------------------------------------------------------------------------------------------------------------------------------------------------------------------------------------------------------------------------------------------------------------------------------------------------------------------------------------------------------------------------------------------------------------------------------------------------------------------------------------------|--|--|------------------------------------------------------------------------------------------------------------------------------------------------------------------------------------------------------------------------------------------------------------------------------------------------------------------------------------------------------------------------------------------------------------------------------------------------------------------------------------------------------------------------------------------------------------------------------------------------------------------------------------------------------------------------------------------------------------------------------------------------------------------------------------------------------------------------------------------------------------------------------------------------------------------------------------------------------------------------------------------------------------------------------------------------------------------------------------------------------------------------------------------------------------|

|  |  |  |                                                                                                                                                                                                                                                                                                                                                                                                                                                                                                                                                                                                                                                                                                                                                                                                                                                                                                                                                                                                                                                                                                                                                           |  |  |                                                                                                                                                                                                                                                                                                                                                                                                                                                                                                                                                                                                                                                                                                                                                                                                                                                                                                                                                                                                                                                                                                                                                            |
|--|--|--|-----------------------------------------------------------------------------------------------------------------------------------------------------------------------------------------------------------------------------------------------------------------------------------------------------------------------------------------------------------------------------------------------------------------------------------------------------------------------------------------------------------------------------------------------------------------------------------------------------------------------------------------------------------------------------------------------------------------------------------------------------------------------------------------------------------------------------------------------------------------------------------------------------------------------------------------------------------------------------------------------------------------------------------------------------------------------------------------------------------------------------------------------------------|--|--|------------------------------------------------------------------------------------------------------------------------------------------------------------------------------------------------------------------------------------------------------------------------------------------------------------------------------------------------------------------------------------------------------------------------------------------------------------------------------------------------------------------------------------------------------------------------------------------------------------------------------------------------------------------------------------------------------------------------------------------------------------------------------------------------------------------------------------------------------------------------------------------------------------------------------------------------------------------------------------------------------------------------------------------------------------------------------------------------------------------------------------------------------------|
|  |  |  | ENSMUSG00000015880, ENSMUSG00000022026,<br>ENSMUSG00000006930, ENSMUSG00000024989,<br>ENSMUSG00000006398, ENSMUSG00000068744,<br>ENSMUSG00000028072, ENSMUSG00000059565,<br>ENSMUSG00000040253, ENSMUSG00000023341,<br>ENSMUSG00000051498, ENSMUSG00000046718,<br>ENSMUSG00000029816, ENSMUSG00000054072,<br>ENSMUSG00000079019, ENSMUSG00000028718,<br>ENSMUSG00000079362, ENSMUSG00000022548,<br>ENSMUSG00000032322, ENSMUSG00000050578,<br>ENSMUSG00000040084, ENSMUSG00000028270,<br>ENSMUSG00000038357, ENSMUSG00000024795,<br>ENSMUSG0000002068, ENSMUSG00000001156,<br>ENSMUSG00000030793, ENSMUSG00000003283,<br>ENSMUSG00000079620, ENSMUSG00000030867,<br>ENSMUSG00000022622, ENSMUSG00000024397,<br>ENSMUSG00000036362, ENSMUSG00000044583,<br>ENSMUSG00000058290, ENSMUSG00000055629,<br>ENSMUSG00000025044, ENSMUSG00000003484,<br>ENSMUSG00000038642, ENSMUSG00000028255,<br>ENSMUSG00000029298, ENSMUSG00000020641,<br>ENSMUSG00000060519, ENSMUSG00000020638,<br>ENSMUSG00000017146, ENSMUSG00000028874,<br>ENSMUSG00000037860, ENSMUSG00000026088,<br>ENSMUSG00000026011, ENSMUSG00000029366,<br>ENSMUSG00000079227, ENSMUSG00000037628, |  |  | ENSMUSG00000028116, ENSMUSG00000045103,<br>ENSMUSG00000024653, ENSMUSG00000029695,<br>ENSMUSG00000020532, ENSMUSG00000020475,<br>ENSMUSG00000009471, ENSMUSG00000020123,<br>ENSMUSG00000017204, ENSMUSG00000032262,<br>ENSMUSG00000029153, ENSMUSG00000044156,<br>ENSMUSG00000031209, ENSMUSG00000032310,<br>ENSMUSG00000073131, ENSMUSG00000032418,<br>ENSMUSG00000026668, ENSMUSG00000031176,<br>ENSMUSG00000037071, ENSMUSG00000038776,<br>ENSMUSG00000060579, ENSMUSG00000029193,<br>ENSMUSG00000052187, ENSMUSG00000027077,<br>ENSMUSG00000047746, ENSMUSG00000030785,<br>ENSMUSG00000092137, ENSMUSG00000030554,<br>ENSMUSG00000025260, ENSMUSG00000068270,<br>ENSMUSG00000057003, ENSMUSG00000024500,<br>ENSMUSG00000078658, ENSMUSG00000033595,<br>ENSMUSG00000037347, ENSMUSG00000061086,<br>ENSMUSG00000067653, ENSMUSG00000020216,<br>ENSMUSG00000055561, ENSMUSG00000048142,<br>ENSMUSG00000091971, ENSMUSG00000032064,<br>ENSMUSG00000066071, ENSMUSG00000031710,<br>ENSMUSG00000002769, ENSMUSG00000050296,<br>ENSMUSG00000026532, ENSMUSG00000051373,<br>ENSMUSG00000028396, ENSMUSG00000006373,<br>ENSMUSG00000025656, ENSMUSG00000019478, |
|--|--|--|-----------------------------------------------------------------------------------------------------------------------------------------------------------------------------------------------------------------------------------------------------------------------------------------------------------------------------------------------------------------------------------------------------------------------------------------------------------------------------------------------------------------------------------------------------------------------------------------------------------------------------------------------------------------------------------------------------------------------------------------------------------------------------------------------------------------------------------------------------------------------------------------------------------------------------------------------------------------------------------------------------------------------------------------------------------------------------------------------------------------------------------------------------------|--|--|------------------------------------------------------------------------------------------------------------------------------------------------------------------------------------------------------------------------------------------------------------------------------------------------------------------------------------------------------------------------------------------------------------------------------------------------------------------------------------------------------------------------------------------------------------------------------------------------------------------------------------------------------------------------------------------------------------------------------------------------------------------------------------------------------------------------------------------------------------------------------------------------------------------------------------------------------------------------------------------------------------------------------------------------------------------------------------------------------------------------------------------------------------|

|  |  |  |                                                                                                                                                                                                                                                                                                                                                                                                                                           |  |                                                                                                                                                                                                                                                                                                                                                                                                                                                                                                                                                                                                                                                                                                                                                                                                                                                                                                                                                                                                                                                                                                                                                          |
|--|--|--|-------------------------------------------------------------------------------------------------------------------------------------------------------------------------------------------------------------------------------------------------------------------------------------------------------------------------------------------------------------------------------------------------------------------------------------------|--|----------------------------------------------------------------------------------------------------------------------------------------------------------------------------------------------------------------------------------------------------------------------------------------------------------------------------------------------------------------------------------------------------------------------------------------------------------------------------------------------------------------------------------------------------------------------------------------------------------------------------------------------------------------------------------------------------------------------------------------------------------------------------------------------------------------------------------------------------------------------------------------------------------------------------------------------------------------------------------------------------------------------------------------------------------------------------------------------------------------------------------------------------------|
|  |  |  | ENSMUSG00000036469, ENSMUSG00000035683,<br>ENSMUSG00000031765, ENSMUSG00000028269,<br>ENSMUSG00000040204, ENSMUSG00000024349,<br>ENSMUSG00000036223, ENSMUSG00000031891,<br>ENSMUSG00000043811, ENSMUSG00000026981,<br>ENSMUSG00000044827, ENSMUSG00000045471,<br>ENSMUSG00000072572, ENSMUSG00000046879,<br>ENSMUSG00000012428, ENSMUSG00000024339,<br>ENSMUSG00000023940, ENSMUSG00000026779,<br>ENSMUSG00000026177, ENSMUSG00000032218 |  | ENSMUSG00000031097, ENSMUSG00000048758,<br>ENSMUSG00000026418, ENSMUSG00000049173,<br>ENSMUSG00000028307, ENSMUSG00000039956,<br>ENSMUSG00000032203, ENSMUSG00000032452,<br>ENSMUSG00000090877, ENSMUSG00000039952,<br>ENSMUSG0000002010, ENSMUSG00000063816,<br>ENSMUSG00000032279, ENSMUSG00000039661,<br>ENSMUSG00000010051, ENSMUSG00000017697,<br>ENSMUSG00000028148, ENSMUSG00000061959,<br>ENSMUSG00000038967, ENSMUSG00000032348,<br>ENSMUSG00000064179, ENSMUSG00000052974,<br>ENSMUSG00000027470, ENSMUSG00000041616,<br>ENSMUSG00000091898, ENSMUSG00000059327,<br>ENSMUSG00000023013, ENSMUSG00000017309,<br>ENSMUSG00000032083, ENSMUSG00000075217,<br>ENSMUSG00000032375, ENSMUSG00000042903,<br>ENSMUSG00000055632, ENSMUSG00000024892,<br>ENSMUSG00000052374, ENSMUSG00000031980,<br>ENSMUSG0000006675, ENSMUSG00000025488,<br>ENSMUSG00000033831, ENSMUSG00000025270,<br>ENSMUSG00000031312, ENSMUSG00000008153,<br>ENSMUSG00000032380, ENSMUSG00000032401,<br>ENSMUSG00000031841, ENSMUSG00000033577,<br>ENSMUSG00000024972, ENSMUSG00000031972,<br>ENSMUSG00000061816, ENSMUSG00000026691,<br>ENSMUSG00000032216, ENSMUSG00000028773, |
|--|--|--|-------------------------------------------------------------------------------------------------------------------------------------------------------------------------------------------------------------------------------------------------------------------------------------------------------------------------------------------------------------------------------------------------------------------------------------------|--|----------------------------------------------------------------------------------------------------------------------------------------------------------------------------------------------------------------------------------------------------------------------------------------------------------------------------------------------------------------------------------------------------------------------------------------------------------------------------------------------------------------------------------------------------------------------------------------------------------------------------------------------------------------------------------------------------------------------------------------------------------------------------------------------------------------------------------------------------------------------------------------------------------------------------------------------------------------------------------------------------------------------------------------------------------------------------------------------------------------------------------------------------------|

|  |  |  |  |  |  |                                                                                                                                                                                                                                                                                                                                                                                                                                                                                                                                                                                                                                                                                                                                                                                                                                                                                                                                                                                                                                                                                                                                                            |
|--|--|--|--|--|--|------------------------------------------------------------------------------------------------------------------------------------------------------------------------------------------------------------------------------------------------------------------------------------------------------------------------------------------------------------------------------------------------------------------------------------------------------------------------------------------------------------------------------------------------------------------------------------------------------------------------------------------------------------------------------------------------------------------------------------------------------------------------------------------------------------------------------------------------------------------------------------------------------------------------------------------------------------------------------------------------------------------------------------------------------------------------------------------------------------------------------------------------------------|
|  |  |  |  |  |  | ENSMUSG00000029019, ENSMUSG00000020469,<br>ENSMUSG00000057880, ENSMUSG00000031299,<br>ENSMUSG00000026621, ENSMUSG00000000889,<br>ENSMUSG00000079435, ENSMUSG00000021573,<br>ENSMUSG00000027887, ENSMUSG00000023046,<br>ENSMUSG00000090150, ENSMUSG00000031144,<br>ENSMUSG00000025812, ENSMUSG00000041476,<br>ENSMUSG00000066592, ENSMUSG00000026489,<br>ENSMUSG00000012187, ENSMUSG00000010047,<br>ENSMUSG00000033578, ENSMUSG00000062515,<br>ENSMUSG00000070570, ENSMUSG00000020182,<br>ENSMUSG00000001865, ENSMUSG00000020524,<br>ENSMUSG00000039278, ENSMUSG00000031812,<br>ENSMUSG00000056328, ENSMUSG00000025150,<br>ENSMUSG00000019102, ENSMUSG00000031760,<br>ENSMUSG00000032839, ENSMUSG00000066475,<br>ENSMUSG00000007877, ENSMUSG00000040055,<br>ENSMUSG00000022878, ENSMUSG00000032314,<br>ENSMUSG00000008658, ENSMUSG00000013076,<br>ENSMUSG00000025860, ENSMUSG00000027224,<br>ENSMUSG00000032374, ENSMUSG00000023019,<br>ENSMUSG00000066072, ENSMUSG00000030278,<br>ENSMUSG00000032086, ENSMUSG00000030972,<br>ENSMUSG00000032908, ENSMUSG00000025431,<br>ENSMUSG00000056267, ENSMUSG00000079434,<br>ENSMUSG00000001494, ENSMUSG00000052305, |
|--|--|--|--|--|--|------------------------------------------------------------------------------------------------------------------------------------------------------------------------------------------------------------------------------------------------------------------------------------------------------------------------------------------------------------------------------------------------------------------------------------------------------------------------------------------------------------------------------------------------------------------------------------------------------------------------------------------------------------------------------------------------------------------------------------------------------------------------------------------------------------------------------------------------------------------------------------------------------------------------------------------------------------------------------------------------------------------------------------------------------------------------------------------------------------------------------------------------------------|

|  |  |  |  |  |  |                                                                                                                                                                                                                                                                                                                                                                                                                                                                                                                                                                                                                                                                                                                                                                                                                                                                                                                                                                                                                                                 |
|--|--|--|--|--|--|-------------------------------------------------------------------------------------------------------------------------------------------------------------------------------------------------------------------------------------------------------------------------------------------------------------------------------------------------------------------------------------------------------------------------------------------------------------------------------------------------------------------------------------------------------------------------------------------------------------------------------------------------------------------------------------------------------------------------------------------------------------------------------------------------------------------------------------------------------------------------------------------------------------------------------------------------------------------------------------------------------------------------------------------------|
|  |  |  |  |  |  | ENSMUSG00000022040, ENSMUSG00000025271,<br>ENSMUSG00000046814, ENSMUSG00000025265,<br>ENSMUSG00000032531, ENSMUSG00000032047,<br>ENSMUSG00000027380, ENSMUSG00000025175,<br>ENSMUSG00000025810, ENSMUSG00000032366,<br>ENSMUSG00000055980, ENSMUSG00000040147,<br>ENSMUSG00000032010, ENSMUSG00000018566,<br>ENSMUSG00000021055, ENSMUSG00000064201,<br>ENSMUSG00000041361, ENSMUSG00000031919,<br>ENSMUSG00000032067, ENSMUSG00000060180,<br>ENSMUSG00000022519, ENSMUSG00000073465,<br>ENSMUSG00000025153, ENSMUSG00000024526,<br>ENSMUSG00000030546, ENSMUSG00000055653,<br>ENSMUSG00000031105, ENSMUSG00000032570,<br>ENSMUSG00000024039, ENSMUSG00000001134,<br>ENSMUSG00000045414, ENSMUSG00000000168,<br>ENSMUSG00000007815, ENSMUSG00000025991,<br>ENSMUSG00000038239, ENSMUSG00000061273,<br>ENSMUSG00000043165, ENSMUSG00000052131,<br>ENSMUSG00000000266, ENSMUSG00000034467,<br>ENSMUSG00000025794, ENSMUSG00000035540,<br>ENSMUSG00000030747, ENSMUSG00000075307,<br>ENSMUSG00000041220, ENSMUSG00000031373,<br>ENSMUSG00000035202 |
|--|--|--|--|--|--|-------------------------------------------------------------------------------------------------------------------------------------------------------------------------------------------------------------------------------------------------------------------------------------------------------------------------------------------------------------------------------------------------------------------------------------------------------------------------------------------------------------------------------------------------------------------------------------------------------------------------------------------------------------------------------------------------------------------------------------------------------------------------------------------------------------------------------------------------------------------------------------------------------------------------------------------------------------------------------------------------------------------------------------------------|

**Supplementary Table S5:** The mutation sites of the Jia6/10 and LN/09 viruses genomes after they infected lung tissues.

|                                 | day 3               | day 5             |
|---------------------------------|---------------------|-------------------|
| <b>Jia6/10-HA</b>               |                     |                   |
| 549: A   G <sup>a</sup>         | 32   2 <sup>b</sup> | 7   8             |
| 609: A   C                      | 19   118            | 28   24           |
| 654: C   A                      | 19   114            | 27   24           |
| 748: G   A                      | 43   356            | 99   108          |
| 869: A   G                      | 51   107            | 59   35           |
| 1002: G   A                     | 39   54             | 78   34           |
| <b>Jia6/10-M</b>                |                     |                   |
| 3: G   C                        | 0   66              | 0   22            |
| 7: A   C                        | 81   56             | 33   9            |
| <b>Jia6/10-NA</b>               |                     |                   |
| 1171: G   A                     | 0   102             | 0   30            |
| 1186: C   U                     | 0   116             | 0   29            |
| 1414: C   U                     | 0   29              | 0   12            |
| <b>Jia6/10-NP</b>               |                     |                   |
| 263: U   A                      | 0   138             | 0   51            |
| 461: U   G                      | 0   594             | 0   185           |
| 1076: U   C                     | 84   34             | 28   17           |
| <b>Jia6/10-NS</b>               |                     |                   |
| 295: C   U                      | 0   199             | 0   68            |
| 304: G   A                      | 191   30            | 66   10           |
| 373: U   C                      | 0   115             | 0   49            |
| <b>Jia6/10-PA</b>               |                     |                   |
| 4: A   G                        | 0   47              | 0   11            |
| 181: U   A                      | 76   12             | 14   0            |
| 299: G   A                      | 0   26              | 0   22            |
| 340: C   A                      | 7   9               | 6   4             |
| 1288: G   U                     | 0   25              | 0   13            |
| 1606: G   A                     | 0   12              | 0   6             |
| 1611: U   C                     | 8   6               | 3   3             |
| 2104: U   C                     | 113   21            | 29   12           |
| <b>Jia6/10-PB1</b>              |                     |                   |
| 4: A   G                        | 0   18              | 0   4             |
| 2286: G   A                     | 0   27              | 0   11            |
| <b>Jia6/10-PB2</b>              |                     |                   |
| 1739: C   U                     | 0   2               | 0   6             |
| 1967: C   U                     | 0   10              | 0   8             |
| <b>LN/09-M</b>                  |                     |                   |
| 162: U   A   C   G <sup>c</sup> | 933   29   14   35  | 379   12   8   14 |
| 164: A   G                      | 911   33            | 370   28          |

---

|                  |         |         |
|------------------|---------|---------|
| <b>LN/09-NA</b>  |         |         |
| 326: G   A       | 0   47  | 0   24  |
| 699: C   A       | 0   42  | 0   33  |
| 912: G   C       | 96   3  | 88   7  |
| 913: G   U       | 100   4 | 88   7  |
| 1023: A   U      | 0   102 | 0   51  |
| 1045: A   G      | 0   90  | 0   36  |
| <b>LN/09-NS</b>  |         |         |
| 457: C   U       | 0   231 | 0   121 |
| 633: C   U       | 0   241 | 0   112 |
| 821: G   A       | 0   223 | 0   233 |
| <b>LN/09-PA</b>  |         |         |
| 1357: C   U      | 0   16  | 0   14  |
| 1412: C   U      | 0   29  | 0   29  |
| <b>LN/09-PB1</b> |         |         |
| 219: C   G       | 0   115 | 0   103 |
| 875: G   A       | 0   44  | 0   33  |
| 1977: G   A      | 0   65  | 0   37  |
| <b>LN/09-PB2</b> |         |         |
| 405: C   A       | 0   7   | 0   6   |
| 1187: A   G      | 0   18  | 0   18  |
| 1422: U   C      | 0   12  | 0   9   |

---

Note: a: nucleotide of the virus gene before | after the infection by Jia6/10 and LN/09 viruses;

b: read number of the nucleotide supported by the transcriptome data;

c: three different nucleotides (A, C, G) mutation appeared after Jia6/10 and LN/09 infection.

**Table S6. Expression level of the genes associated with chemokines and pro- and anti-oxidation stimulation (compared the expression level of the chemokines and pro-and anti-oxidation genes between Jia6/10 and Hm/06)**

| ID                  | Symbol | CK-3d   | CK-5d   | Jia6-3d | Jia6-5d | LN-3d   | LN-5d   | HM-3d   | HM-5d   |
|---------------------|--------|---------|---------|---------|---------|---------|---------|---------|---------|
| ENSMUSG00000015340  | Cybb   | 16.1977 | 17.6038 | 61.8652 | 50.5622 | 36.6496 | 15.3475 | 45.2748 | 55.9151 |
| ENSMUSG00000020826  | Nos2   | 2.34194 | 2.53531 | 5.98394 | 6.45757 | 2.54951 | 3.77291 | 5.87551 | 17.0456 |
| ENSMUSG00000024066  | Xdh    | 118.483 | 104.951 | 385.017 | 468.328 | 233.688 | 344.728 | 558.785 | 529.265 |
| ENSMUSG00000031760  | Mt3    | 5.87108 | 2.75646 | 0.55951 | 1.97873 | 5.70209 | 1.89663 | 4.7961  | 5.541   |
| ENSMUSG00000018339  | Gpx3   | 684.833 | 597.253 | 878.31  | 953.496 | 909.898 | 619.1   | 1283.29 | 1744.97 |
| ENSMUSG00000003849  | Nqo1   | 8.74026 | 5.25201 | 3.68275 | 2.10541 | 7.8377  | 4.03612 | 3.09642 | 1.86138 |
| ENSMUSG00000006818  | Sod2   | 41.4789 | 33.8039 | 67.5659 | 63.1345 | 48.3926 | 55.9216 | 86.0939 | 93.8314 |
| ENSMUSG00000027187  | Cat    | 140.386 | 118.048 | 54.6045 | 35.9683 | 91.6875 | 54.5033 | 63.1542 | 30.6649 |
| ENSMUSG00000011382  | Dhdh   | 9.98058 | 10.5057 | 5.91993 | 5.60271 | 7.6412  | 5.62787 | 4.11363 | 3.43853 |
| ENSMUSG00000020676  | Ccl11  | 5.99633 | 4.11177 | 8.99524 | 6.04383 | 13.9018 | 8.89169 | 20.3788 | 11.271  |
| ENSMUSG00000035385  | Ccl2   | 2.32551 | 0.36198 | 152.271 | 88.2676 | 62.5232 | 66.9286 | 342.068 | 429.925 |
| ENSMUSG00000004814  | Ccl24  | 1.45703 | 1.2144  | 0.93411 | 1.23882 | 1.84252 | 2.60101 | 2.72971 | 2.17253 |
| ENSMUSG00000018930  | Ccl4   | 0.77608 | 0.37449 | 64.308  | 65.3251 | 21.4411 | 42.8475 | 127.06  | 68.162  |
| ENSMUSG00000035373  | Ccl7   | 1.81182 | 0.51428 | 145.184 | 91.7983 | 65.9726 | 88.7176 | 306.907 | 359.311 |
| ENSMUSG00000019122  | Ccl9   | 6.39214 | 4.70786 | 19.5735 | 11.3623 | 24.4391 | 10.6515 | 22.6869 | 29.904  |
| ENSMUSG00000029380  | Cxcl1  | 2.23947 | 1.72902 | 75.4909 | 19.8677 | 42.1588 | 23.3262 | 80.3652 | 48.9118 |
| ENSMUSG00000034855  | Cxcl10 | 1.29176 | 0.43362 | 352.77  | 262.087 | 77.0187 | 288.902 | 478.328 | 469.267 |
| ENSMUSG000000061353 | Cxcl12 | 42.5382 | 43.0076 | 36.8907 | 43.2002 | 45.3037 | 39.4466 | 30.1249 | 78.988  |
| ENSMUSG00000023078  | Cxcl13 | 18.1063 | 9.82476 | 96.7491 | 95.1468 | 44.5062 | 47.6794 | 86.2165 | 308.786 |
| ENSMUSG00000021508  | Cxcl14 | 22.6183 | 35.0249 | 27.8505 | 48.3434 | 43.9697 | 54.2139 | 73.3442 | 91.3758 |
| ENSMUSG00000058427  | Cxcl2  | 0.3732  | 0.09004 | 12.2271 | 3.28259 | 10.1663 | 2.27019 | 24.9955 | 14.266  |
| ENSMUSG00000029371  | Cxcl5  | 1.34114 | 0.54759 | 17.8245 | 6.01886 | 12.0784 | 12.4191 | 31.5362 | 15.7745 |
